# Supplementary material for: Orai-mediated calcium entry determines activity of central dopaminergic neurons by regulation of gene expression
Source: eLife. 2024 Jan 30;12:RP88808. doi: 10.7554/eLife.88808 (PMC10945566; doi:10.7554/eLife.88808)
Supplement: Figure 1—figure supplement 1—source data 1. [file elife-88808-fig1-figsupp1-data1.xlsx]

## Sheet: Sheet1
CS	THD'GAL4/+	THD'GAL4>OraiWT
900	87	900
104	105	900
214	214	900
238	238	620
733	733	592
676	676	541
737	737	525
900	900	535
172	172	422
235	235	398
492	492	402
501	501	400
735	735	395
900	900	487
277	277	317
303	303	314
408	408	350
415	415	201
395	395	198
572	572	204
540	540	206
575	575	211
584	584	175
596	596	189
65	65	147
95	95	66
113	113	90
150	150	124
174	174	133
204	204	70
526	526	55
655	655	57
900	900	69
900	900	51
289	289
303	303
404	404
510	510
900	900
203	203
293	293
327	327
438	438
442	442
495	495
900	900
810
650
900
609
759
