# Supplementary material for: Orai-mediated calcium entry determines activity of central dopaminergic neurons by regulation of gene expression
Source: eLife. 2024 Jan 30;12:RP88808. doi: 10.7554/eLife.88808 (PMC10945566; doi:10.7554/eLife.88808)
Supplement: Figure 1—figure supplement 3—source data 1. [file elife-88808-fig1-figsupp3-data1.xlsx]

## Sheet: Sheet1
CS	E180A/+	MB438B/+	MB438B> E180A	MB504BGAL4/+	MB504BGAL4>E180A
900	44	900	900	36	499
104	79	900	495	147	900
214	166	900	642	276	900
238	184	214	800	286	900
733	216	900	650	376	900
676	229	900	520	403	5
737	249	540	449	416	72
900	317	555	405	587	80
172	367	900	900	720	109
235	368	900	338	710	141
492	469	900	557	900	44
501	456	900	900	793	128
735	530	900	900	900	201
900	576	320	562	900	415
277	585	500	145	900	490
303	887	515	215	240	900
408	900	900	670	246	900
415	80	900	650	900	99
395	125	520	900	900	130
572	214	900	344	900	252
540	221	764	735	246	433
575	254	586	357	213	450
584	289	900	900	259	630
596	354	900	243	271	650
65	366	735	440	276	900
95	421	410	453	307	900
113	396	615	620	219	900
150	457	552	586	321	50
174	493	170	900	423	77
204	553		900	403	134
526	570		735	730	113
655	563		410	747	214
900	733		615	808	276
900	723			825	290
289	715			64	900
303	733			126	900
404	816			185	900
510	900			328	87
900	900			319	125
203	881			381	243
293				391	350
327				449	360
438				900	454
442				900	476
495				900	459
900					515
810					559
650					36
900					181
609					226
759					900
					900
