# Supplementary material for: Orai-mediated calcium entry determines activity of central dopaminergic neurons by regulation of gene expression
Source: eLife. 2024 Jan 30;12:RP88808. doi: 10.7554/eLife.88808 (PMC10945566; doi:10.7554/eLife.88808)
Supplement: Figure 1—figure supplement 4—source data 1. [file elife-88808-fig1-figsupp4-data1.xlsx]

## Sheet: Sheet1
CS	shits/+ (18 C)	THD'>shits (30)	THD'-TNT@18C	THD'-TNT@29C
900	109	10	83	0
104	108	8	144	0
214	118	18	106	0
238	162	23	165	0
733	230	29	166	0
676	270	35	213	0
737	325	41	103	0
900	343	69	170	0
172	373	86	256	0
235	382	91	276	0
492	383	103	284	0
501	400	30	314	0
735	445	36	337	0
900	536	44	368	0
277	549	57	373	0
303	580	74	374	0
408	576	106	493	0
415	900	106	523	0
395	900	117	900	0
572	900	138	900	3
540	900	159	900	53
575	456	165	199	141
584	528	176	280	145
596	583	212	199	191
65		277	280	330
95		321	194	251
113		8	282	0
150		10	326	3
174		21	900	2
204		28	900	4
526		41	153	5
655		75	149	6
900		85	182	8
900		158	191	10
289		195	305	9
303		215	267	41
404		257	615	51
510			328	164
900			371	131
203			289	61
293				187
327				120
438				0
442				0
495				0
900				0
810				0
650				0
900
609
759
