# Supplementary material for: Orai-mediated calcium entry determines activity of central dopaminergic neurons by regulation of gene expression
Source: eLife. 2024 Jan 30;12:RP88808. doi: 10.7554/eLife.88808 (PMC10945566; doi:10.7554/eLife.88808)
Supplement: Figure 1—figure supplement 8—source data 1. [file elife-88808-fig1-figsupp8-data1.xlsx]

## Sheet: Sheet1
DOWN	Gene	Base mean	FC	UP	Gene	Base mean	FC
	NM_001258923	52.359	-5.09131		NM_165173	75.5885	6.18521
	NM_001201808	83.3667	-3.98663		NR_047967	33.6339	5.27002
	NM_167957	28.004	-3.90415		NM_001299054	13.1935	3.57294
	NM_139615	76012.8	-3.56019		NR_047969	10.2486	3.32796
	NM_132113	16.1111	-3.51675		NM_140670	1894.82	3.25605
	NM_133081	4125.13	-3.38283		NM_001144636	51.5788	3.03924
	NM_140605	1423.21	-3.14263		NM_167839	8.65106	3.01305
	NM_001299130	12.4615	-3.07786		NM_001014488	11.4674	2.83947
	NM_139617	20930.4	-2.73608		NM_205884	281.292	2.74869
	NM_001201801	76.9797	-2.73141		NR_047972	6.61628	2.73034
	NM_133045	168.806	-2.71965		NM_079157	12.4062	2.67043
	NM_164807	58.0812	-2.65804		NM_176373	21.5182	2.65327
	NM_079252	117.257	-2.609		NR_123834	6.71201	2.62084
	NM_135783	125.32	-2.58656		NM_057988	63.4549	2.5273
	NM_166483	89.3027	-2.57061		NR_124310	38.0841	2.47795
	NM_135846	1129.75	-2.54304		NM_130564	16.7516	2.44231
	NM_144350	19.9134	-2.51938		NM_142904	51.2891	2.36634
	NM_001298528	372.306	-2.51514		NM_165172	7.28344	2.29365
	NM_001272527	176.077	-2.47718		NR_124040	8.17329	2.28808
	NM_206392	90.7375	-2.46281		NM_136420	232.299	2.24609
	NM_141638	16.0686	-2.44048		NM_170226	26.7142	2.20874
	NM_001316470	84.8471	-2.43915		NM_138179	18.8079	2.17268
	NM_141647	11.7064	-2.33346		NR_124778	31.931	2.16655
	NM_001382136	25.1849	-2.3131		NM_176371	11.1026	2.11427
	NM_001382107	73.9316	-2.28362		NR_133298	213.214	2.11281
	NM_001042979	108.391	-2.28036		NM_135298	4.36982	2.09235
	NM_176356	71.7812	-2.27502		NR_124523	3184.33	2.01887
	NM_135845	505.953	-2.27314		NM_001042889	754.448	2.0084
	NM_168448	12.5574	-2.27081		NM_058049	23.1987	2.00281
	NM_141521	22.1023	-2.26278		NM_135115	3.94793	1.99002
	NM_141527	72.8223	-2.25508		NM_142524	5.07068	1.98746
	NM_142798	7.48568	-2.23209		NR_124410	5.79016	1.95399
	NM_144144	12.6902	-2.16223		NM_169962	4.51239	1.94655
	NM_141539	22.7247	-2.13273		NM_079729	66.8496	1.94182
	NM_170415	5.51455	-2.12677		NM_001038981	4.29091	1.93274
	NM_137568	46.4039	-2.09877		NM_136208	6.1328	1.90903
	NM_001043273	6.44618	-2.09319		NM_137257	35.2794	1.89968
	NM_165945	18.4925	-2.07433		NM_057279	4.30496	1.83891
	NM_134955	30.5043	-2.0721		NM_140977	20.031	1.82841
	NM_001144507	8.2863	-2.07008		NM_001298843	7.65925	1.82649
	NM_143039	72.8654	-2.04813		NM_144084	5.92948	1.81503
	NM_132547	14.1288	-2.0474		NM_001259572	5.44748	1.81385
	NR_123918	27.6283	-2.03733		NM_135810	10.4519	1.76695
	NM_143278	12.8792	-2.02969		NM_001272952	55.3702	1.74854
	NM_078891	122.865	-2.01037		NM_132603	22.094	1.73991
	NM_079443	332.681	-2.0093		NM_138052	3.2254	1.72209
	NM_167082	36.4432	-2.00142		NM_137612	165.362	1.70888
	NR_133334	21.6074	-1.99967		NM_176486	150.121	1.70197
	NM_001103433	13.6507	-1.99857		NM_134824	8.63274	1.70093
	NM_137764	5.78254	-1.97609		NM_168830	252.069	1.67096
	NM_001275109	21.1045	-1.9667		NM_001299038	15.7753	1.6595
	NM_057311	10.2148	-1.96202		NM_134575	9.97048	1.6499
	NM_001260210	24.4625	-1.95699		NM_205992	3.36715	1.63047
	NM_143685	23.3599	-1.95337		NR_124199	4.10982	1.61935
	NM_078722	4.27222	-1.94132		NM_001275874	50.0532	1.61907
	NM_166053	25.0649	-1.941		NM_166244	206.301	1.6075
	NR_073866	341.343	-1.93576		NM_057486	471.594	1.5981
	NM_001169430	19.3268	-1.93096		NM_134917	6.63391	1.59581
	NM_166465	4.60826	-1.93092		NR_133269	27.7183	1.58986
	NM_142094	14.9338	-1.92277		NM_135781	192.507	1.58954
	NR_124562	11.8491	-1.9206		NM_169523	3.48473	1.57842
	NM_166734	212.88	-1.91956		NM_170495	6.76389	1.57256
	NM_132108	55.1049	-1.91448		NM_141360	7.27411	1.5716
	NM_170639	80.998	-1.90852		NM_135349	9.30918	1.57146
	NM_001297832	16.7678	-1.8958		NM_057382	585.762	1.56717
	NM_134541	252.957	-1.8939		NM_001273175	6.57578	1.56575
	NM_168539	37.5594	-1.89379		NM_136526	18.9381	1.56412
	NR_133377	41.4252	-1.89318		NR_133378	7.60333	1.55751
	NM_176212	45.9668	-1.89242		NR_124405	15.9467	1.55041
	NM_001300089	6.85949	-1.87863		NM_176685	43.7396	1.54988
	NM_001272419	9.26704	-1.86785		NM_143184	3.65644	1.5344
	NM_144304	12.7209	-1.86623		NR_133279	124.142	1.53257
	NR_133126	203.688	-1.86489		NM_141774	10.4176	1.53053
	NM_080292	18.2148	-1.85723		NM_135555	208.027	1.52586
	NM_140014	37.441	-1.84564		NM_001169977	6.28561	1.5238
	NM_058149	119.331	-1.84441		NM_001299068	4.28384	1.52047
	NM_001169410	3.33469	-1.832		NM_134744	6.47551	1.51292
	NM_142517	9.93456	-1.8257		NR_073822	5.81342	1.51008
	NM_001169746	16.2085	-1.8071		NR_167820	4.70152	1.50066
	NR_124807	11.7039	-1.79921		NM_134843	7.96286	1.50058
	NM_080093	29.3544	-1.78891		NM_138214	32.4021	1.49829
	NM_080018	40.0592	-1.7863		NM_170207	264.83	1.49825
	NM_001300583	12.1609	-1.78414		NM_165508	2.58324	1.47683
	NM_141551	13.2674	-1.78251		NM_001273318	6.07359	1.47604
	NM_135822	6.18779	-1.78012		NM_057313	41.3888	1.46975
	NM_079204	58.1508	-1.77921		NM_001299696	52.4399	1.4681
	NM_164879	1674.66	-1.77492		NM_142346	3.5188	1.45694
	NM_140294	65.8097	-1.77325		NM_140480	3.37541	1.45214
	NM_141529	161.856	-1.76869		NM_132417	10.1146	1.45143
	NM_165914	16.6965	-1.75957		NR_048125	5.99521	1.44064
	NM_141667	28.3602	-1.75783		NM_078819	169.476	1.44046
	NM_135224	6.31643	-1.75713		NM_136266	6.04784	1.43568
	NR_073857	11.6153	-1.74708		NM_140172	2254.39	1.43305
	NM_135844	3.45035	-1.74205		NM_079245	2.64505	1.42659
	NM_001299639	50.0708	-1.73927		NM_141215	2.93922	1.42501
	NM_139892	38.9718	-1.73433		NM_001273184	88.3629	1.42278
	NM_166482	4.23459	-1.73149		NM_001298330	2.23655	1.41866
	NM_135451	390.935	-1.69034		NM_143177	3.35682	1.41212
	NM_140852	31.9455	-1.68997		NM_166282	24.044	1.41185
	NM_132271	22.9641	-1.68956		NM_001273907	7.92396	1.41128
	NM_135595	15.5281	-1.68893		NR_073712	131.64	1.40136
	NR_124608	39.6985	-1.68494		NM_001104442	4.5319	1.39864
	NM_001103561	404.461	-1.68114		NM_143368	3.12408	1.39582
	NM_137158	12.1006	-1.67549		NM_143024	7.91816	1.39327
	NM_166787	8.90943	-1.67212		NM_143778	5.53921	1.39083
	NR_074038	76.9676	-1.66544		NM_143227	4.41104	1.38917
	NM_168231	265.788	-1.66167		NM_168751	54.2885	1.38538
	NM_139465	7.21298	-1.65867		NR_123906	12.4247	1.38015
	NM_001104444	178.555	-1.65804		NM_141423	7.31559	1.38007
	NR_124835	11.475	-1.65576		NM_140325	55.3679	1.37645
	NM_001273716	7.0878	-1.65386		NM_132494	2.67204	1.37597
	NM_001316448	295.587	-1.64732		NM_001273522	16.0966	1.37124
	NM_001274306	5.32948	-1.64658		NM_164800	31.2049	1.37043
	NM_132149	6.36268	-1.64069		NR_124491	4.55337	1.36778
	NM_136587	94.2304	-1.63713		NM_165310	7.06685	1.36364
	NM_001259187	39.3942	-1.63649		NM_001347760	15.6166	1.36319
	NM_001144640	21.3009	-1.63191		NM_001169797	11.4656	1.35082
	NM_001273574	71.412	-1.62919		NR_124415	196.831	1.35042
	NM_167315	3.4619	-1.62564		NM_168025	32.9244	1.34882
	NM_166459	354.909	-1.62197		NM_001299644	16.3434	1.3408
	NM_175974	4.71832	-1.6203		NM_136926	11.4548	1.33879
	NM_137470	13.8236	-1.61922		NM_001169697	3.83908	1.33428
	NM_176343	16.4499	-1.61765		NM_135944	90.875	1.32783
	NM_001259621	34.959	-1.61455		NM_143310	225.095	1.32598
	NM_169221	6.48713	-1.60758		NM_141248	3.02903	1.32434
	NM_135817	6.83736	-1.6023		NM_001299530	160.038	1.32349
	NM_164939	39.4568	-1.59805		NM_135419	14.6725	1.31969
	NR_133182	44.5679	-1.59257		NM_001169539	8.03516	1.31448
	NM_135297	40626.9	-1.58568		NM_001144414	170.311	1.31059
	NM_166309	10.1499	-1.58034		NR_167811	4.43903	1.30742
	NR_124632	13.2528	-1.57929		NR_124373	155.589	1.29843
	NM_206264	13.0978	-1.57252		NM_057214	29.3376	1.29204
	NM_134983	58.7654	-1.57185		NR_156767	5.50943	1.29079
	NM_141136	25.7096	-1.57092		NM_168534	4427.62	1.29058
	NR_124147	12.6458	-1.57073		NM_140606	146.432	1.28888
	NM_166481	3.76243	-1.56951		NM_001347812	18.7062	1.288
	NM_137035	6.44792	-1.5687		NM_001298103	24.3273	1.28692
	NM_205873	17.3389	-1.56426		NR_124433	4.03333	1.28639
	NM_135448	26.0253	-1.55681		NR_003122	24.99	1.2799
	NM_140293	39.4101	-1.551		NM_141829	17.3806	1.27971
	NM_136344	5.95477	-1.54738		NM_001014460	9.09351	1.27955
	NM_134954	20.1899	-1.53906		NM_001300213	326.835	1.27543
	NM_080127	7.41237	-1.53756		NM_001299113	28.4325	1.27163
	NM_001260317	9.49435	-1.53167		NM_057655	331.669	1.2687
	NR_125042	73.9077	-1.52985		NM_132216	207.082	1.26556
	NM_140614	2036.29	-1.52493		NM_001275259	9.65398	1.26415
	NR_124909	36.6008	-1.52211		NM_134694	3.98624	1.25978
	NM_001370021	15.3414	-1.52202		NM_167427	1.98876	1.25081
	NM_001104517	50.7237	-1.52157		NR_073722	12.8851	1.24572
	NM_137483	103.821	-1.51812		NM_167527	12.3745	1.24492
	NM_001144495	6.04168	-1.51644		NM_140781	4.13942	1.24324
	NM_057799	21.8443	-1.51471		NR_125128	25.655	1.24309
	NM_140454	57.9768	-1.51442		NM_078781	11.3988	1.24273
	NM_001274724	3.76162	-1.51353		NM_135139	265.161	1.2404
	NM_142963	32.713	-1.50902		NM_080128	1252.01	1.23557
	NM_001300590	158.296	-1.50746		NM_001298922	10.9767	1.22913
	NM_142384	15.5587	-1.50713		NM_135278	65.1626	1.22235
	NM_142937	375.009	-1.50412		NM_001274514	3.4371	1.2218
	NR_133238	7.24194	-1.50354		NM_168641	520.352	1.21331
	NM_137488	10.9566	-1.49754		NR_124247	36.923	1.20621
	NM_001169832	16.2078	-1.49693		NM_001273383	9.9108	1.20376
	NM_166618	44.8681	-1.49671		NM_169832	394.971	1.20179
	NM_136224	16.8879	-1.49541		NR_073982	3.15477	1.19762
	NM_001275128	85.5713	-1.49422		NM_140160	279.198	1.19199
	NM_140104	7.10143	-1.49193		NM_132772	3.47457	1.19045
	NR_123847	14.9295	-1.48484		NM_057976	2280.69	1.18693
	NM_001038929	7.8517	-1.48328		NR_003868	232.368	1.17915
	NM_138089	8.25565	-1.47955		NM_140508	1.78004	1.17489
	NM_137471	40.5025	-1.47817		NM_137273	5.36653	1.168
	NM_169234	21.7763	-1.47734		NM_134867	2.20365	1.16682
	NR_123842	8.16744	-1.47733		NM_001299561	15.9392	1.16459
	NM_165759	44.1726	-1.47567		NM_057828	241.612	1.16322
	NM_001103488	74.2312	-1.47548		NM_141214	2.71072	1.16181
	NM_001273771	7.84687	-1.47525		NM_132217	1011.3	1.15993
	NM_001363934	3.81913	-1.47419		NM_131962	3.65822	1.15806
	NM_136417	12.7503	-1.47375		NM_001259386	7.19385	1.15725
	NR_124810	6.17088	-1.4735		NM_167955	3.37693	1.15673
	NM_143135	42.5512	-1.46609		NM_141040	3.18269	1.1519
	NM_130637	44.7266	-1.46515		NM_001273289	33.0657	1.15157
	NM_167944	23.0638	-1.46491		NM_141382	23.9149	1.15049
	NM_001104518	6.4475	-1.458		NM_206244	10.7722	1.14798
	NM_165319	11283.8	-1.45756		NM_141353	1.94556	1.14622
	NM_176064	23.8155	-1.45421		NM_001299047	194.833	1.14367
	NM_001300165	2.76621	-1.4534		NM_001299815	43.4355	1.14356
	NR_125223	6.48466	-1.45286		NM_135668	3.64143	1.14276
	NR_123922	7.50716	-1.45215		NM_001275914	5.35582	1.13953
	NM_176572	18.3653	-1.45206		NM_206177	105.255	1.13675
	NM_132970	7.90932	-1.44683		NM_137769	10.565	1.13646
	NM_137472	81.1245	-1.44683		NM_206643	86.3394	1.1285
	NM_144079	610.426	-1.44386		NM_142236	211.532	1.1279
	NM_001169590	9.28544	-1.44256		NM_133155	4.14239	1.1275
	NM_001298694	2.84494	-1.44152		NM_139583	1300.54	1.12655
	NR_124683	79.989	-1.43895		NM_137277	5.45756	1.11324
	NR_123807	4380.3	-1.43696		NR_003867	3081.64	1.11188
	NM_001275073	19.953	-1.43658		NM_134730	237.092	1.10811
	NM_139645	496.686	-1.43606		NM_139616	478.593	1.10034
	NM_057783	39.6907	-1.43546		NM_001260269	2.21446	1.09874
	NM_164943	7.3659	-1.43217		NM_135943	2301.44	1.0974
	NM_001300371	4.53296	-1.43117		NM_140673	7.11162	1.09625
	NM_143402	42.8123	-1.42115		NM_166243	39.2636	1.09541
	NR_001762	6.854	-1.42078		NM_136215	4861.57	1.09412
	NM_001275591	12.9804	-1.41797		NM_001272752	5.01896	1.09252
	NM_141279	25.9171	-1.41756		NM_057797	150.562	1.09165
	NM_166836	29.1623	-1.41554		NM_001299996	249.748	1.08909
	NM_136294	7.20732	-1.41466		NM_139817	202.712	1.08825
	NM_135573	89.8261	-1.41384		NM_167275	4605.38	1.08739
	NM_132569	9.28781	-1.41283		NM_057552	17382.7	1.08563
	NM_079135	6.08335	-1.41269		NM_132512	11.8174	1.0838
	NM_136535	42.225	-1.40957		NM_136089	5.95457	1.08138
	NM_142057	42.316	-1.40949		NM_001298818	2.72452	1.08096
	NM_141526	14.4087	-1.40655		NM_001259001	14.8361	1.08052
	NM_135765	16.8534	-1.40327		NM_001274196	4136.59	1.08027
	NM_001300216	155.544	-1.40312		NM_134644	55.5716	1.07985
	NM_001297997	7.47627	-1.40294		NM_142042	5.26599	1.07854
	NM_139511	245.485	-1.40147		NR_073971	414.742	1.07777
	NM_001043115	11.7535	-1.40116		NM_143198	415.31	1.07761
	NM_139762	17.7611	-1.40106		NM_001273099	52.6422	1.0774
	NM_001298026	32.5373	-1.40097		NM_139837	3149.03	1.07585
	NM_136853	36.3093	-1.4002		NM_057693	42.2717	1.07532
	NM_001298975	3.50389	-1.39821		NR_123743	5.3171	1.07469
	NM_057410	32.9671	-1.39571		NM_001259763	1728.3	1.07007
	NM_170263	25.3957	-1.39554		NM_134831	14.2902	1.06941
	NM_001300061	48.7991	-1.39523		NM_164765	6.32558	1.06693
	NR_163202	33.0081	-1.39361		NM_169402	9.11562	1.06648
	NM_001298159	6.10578	-1.3922		NM_170272	74.5693	1.06534
	NM_079831	16.2118	-1.39134		NM_001103922	86.3362	1.06528
	NM_001274597	29.9807	-1.38963		NM_001273491	10.3892	1.06246
	NR_073815	19.643	-1.38859		NM_001272492	6.44126	1.06222
	NM_165083	45.1734	-1.38841		NM_139691	13.4935	1.06189
	NM_001103869	5.14758	-1.38637		NM_133099	8.53205	1.06144
	NM_168312	8.48145	-1.38549		NM_057818	94.0167	1.06028
	NM_132587	12.7782	-1.38401		NM_133158	11.419	1.05853
	NM_142192	69.5712	-1.3808		NM_001274814	4.83853	1.05624
	NM_001276202	2.39019	-1.37959		NM_079407	87.1004	1.05402
	NM_169704	4.816	-1.37808		NM_141566	11.7245	1.0525
	NM_169924	81.5215	-1.37473		NM_164809	1416.15	1.05231
	NR_125300	10.8746	-1.37292		NM_135235	82.6064	1.05195
	NM_142174	58.3859	-1.36984		NM_001201856	78.437	1.04938
	NR_001645	3.76386	-1.36758		NM_001144476	16.5541	1.04934
	NM_001272705	7.10625	-1.36696		NM_165623	5.72578	1.04725
	NM_001259549	9.20214	-1.36614		NM_001300510	60.1803	1.04683
	NM_001299058	8.54074	-1.36279		NM_001298578	5.30366	1.04579
	NM_001273036	324.419	-1.3607		NM_001273018	3.67806	1.04498
	NM_142866	30.9884	-1.36047		NM_001043219	1.59017	1.04432
	NM_135186	31.1426	-1.35955		NM_001298868	7.69429	1.04395
	NM_136861	128.385	-1.35851		NM_143025	3.04506	1.04333
	NM_140388	6.15803	-1.35755		NM_001259761	1254.36	1.04291
	NM_142056	209.169	-1.35317		NM_141590	4.1977	1.04132
	NM_141377	17.4962	-1.35211		NR_133489	3.42299	1.041
	NM_001258475	180.181	-1.34848		NM_001299603	3.62701	1.0376
	NM_143215	16.108	-1.34744		NM_135938	315.487	1.03717
	NM_141562	6.81825	-1.34739		NM_001259694	19.6046	1.03679
	NM_139898	647.038	-1.34706		NM_142629	54.2535	1.03516
	NM_001260123	2.45524	-1.34635		NM_078752	4787.82	1.03395
	NM_137901	9.08583	-1.34465		NM_141384	17.1448	1.03224
	NM_141797	6.83512	-1.34102		NM_135291	9.23694	1.03164
	NM_001144672	7.77052	-1.34078		NM_135900	3.27169	1.02993
	NM_001300368	5.95506	-1.34063		NR_047772	15.4849	1.02861
	NM_001382204	228.777	-1.33968		NM_133002	23.186	1.02159
	NM_136114	46.9154	-1.33519		NM_001144453	4.55072	1.02093
	NM_140402	11.8515	-1.33498		NM_135194	1174.55	1.01897
	NM_080297	50.2313	-1.33428		NM_140692	5.86701	1.01857
	NM_137492	10.9309	-1.33331		NM_142647	592.878	1.01694
	NM_139674	677.249	-1.33185		NM_166433	3.63654	1.01561
	NM_140733	21.1879	-1.33131		NM_137148	11.6694	1.01435
	NM_001299667	427.196	-1.33021		NM_164313	44.5992	1.01242
	NM_137879	7.13676	-1.32845		NM_001300648	56.4035	1.00924
	NM_001298434	4.99859	-1.32789		NR_125227	97.2213	1.00732
	NM_057916	7.20302	-1.32265		NM_001104441	13.8226	1.00725
	NM_001169555	66.8235	-1.32129		NM_001038959	4354.53	1.00525
	NM_001169211	36.6977	-1.31971		NM_134845	3.55496	1.00504
	NM_167056	4.60334	-1.31934		NM_139461	427.42	1.00476
	NM_001201732	21.3313	-1.31683		NM_001103588	1274.03	0.998922
	NM_001259829	3.18978	-1.31352		NM_142661	231.59	0.99778
	NM_169223	26.411	-1.31311		NR_048449	2.84464	0.996774
	NM_142845	159.247	-1.31261		NM_001042879	4107.18	0.995668
	NR_124593	7.10653	-1.31106		NM_140368	197.376	0.995477
	NM_001274301	5.59659	-1.30862		NM_001273648	6.81002	0.995102
	NM_135068	222.155	-1.30813		NM_142931	93.0646	0.992269
	NM_001299390	23.2441	-1.30793		NM_144377	5.00681	0.992001
	NR_133504	4.7078	-1.30614		NM_001274994	154.339	0.991602
	NM_001274895	4.4865	-1.30518		NM_136199	809.209	0.99018
	NR_048470	59.509	-1.30495		NR_073756	6.45944	0.989874
	NM_137701	95.6299	-1.30475		NM_132199	704.67	0.989379
	NM_206274	5.09681	-1.30227		NM_001273503	7.04246	0.989028
	NM_057496	4.59437	-1.30024		NM_135179	6.23217	0.988633
	NM_078500	4.83219	-1.29829		NM_001298743	17.398	0.988463
	NM_141648	14.5649	-1.29679		NM_079863	2.62878	0.988091
	NM_176581	12.2317	-1.29362		NM_166214	11.6228	0.987928
	NM_169055	5.59211	-1.29206		NM_138236	3022.77	0.98748
	NR_163200	24.6153	-1.29095		NM_206410	6.45046	0.984619
	NM_139726	200.675	-1.28271		NM_139420	174.459	0.984601
	NM_001298273	2.68442	-1.28171		NM_001169796	57.1758	0.98372
	NR_124633	14.3059	-1.28063		NM_080002	5.20903	0.983518
	NM_140599	1073.65	-1.2724		NM_169485	1395.61	0.983093
	NM_206468	10.1401	-1.27222		NM_057248	8.6461	0.982033
	NM_140421	4.7247	-1.27194		NM_167739	7.84518	0.981775
	NR_167865	29.5248	-1.27091		NM_080070	2363.1	0.980482
	NM_167561	35.3624	-1.26786		NM_001272539	8.54388	0.980075
	NM_001297887	29.8309	-1.26778		NM_001273504	79.7329	0.979795
	NM_079731	19.2826	-1.26752		NR_033165	1478.65	0.97656
	NM_001272832	45.5102	-1.26553		NM_001169919	3.93125	0.976427
	NM_132837	3.70815	-1.26267		NM_001299979	4.81116	0.975407
	NM_140127	17.288	-1.25917		NM_132308	572.236	0.974592
	NM_132174	40.5497	-1.25887		NM_135242	1559.86	0.973546
	NM_132409	80.5843	-1.25851		NM_137453	12.9482	0.972783
	NM_142032	30.0792	-1.25783		NM_143251	2.23293	0.972721
	NM_170151	12.6187	-1.254		NM_058115	2947.27	0.972307
	NM_133017	42.0431	-1.25344		NR_003801	7.55059	0.971897
	NM_132163	29.2587	-1.25102		NM_001297834	2.73095	0.971384
	NM_001103843	5.44308	-1.25041		NM_168972	138.622	0.970456
	NM_001298478	4.32464	-1.24795		NM_206010	3.55858	0.969787
	NM_001299114	18.4116	-1.24607		NM_001274480	992.072	0.968934
	NM_001299934	12.2649	-1.24434		NM_140917	2.31375	0.967603
	NM_135320	27.4697	-1.24264		NR_133185	8.30819	0.966621
	NM_078921	2.56554	-1.24019		NM_141216	58.2118	0.966521
	NR_133306	19.7639	-1.23903		NM_137133	3.251	0.965488
	NM_165165	14.7592	-1.23741		NR_124168	13.404	0.963416
	NM_137928	138.072	-1.23725		NM_167858	5.23625	0.96231
	NR_073930	129.716	-1.23686		NM_001298805	29.6425	0.961398
	NM_001038860	20.5027	-1.23646		NM_001169358	8.46365	0.959635
	NM_166871	7.51497	-1.23556		NM_130622	4.13714	0.954865
	NM_141583	16.043	-1.23551		NM_001300472	3.69476	0.954664
	NM_001300564	23.5536	-1.23511		NM_168006	7.44822	0.954515
	NM_141962	4.4949	-1.23181		NM_140317	174.412	0.954189
	NM_001038928	30.4583	-1.23174		NM_079557	1278.96	0.953259
	NM_001298408	32.9773	-1.23059		NM_142172	2.48136	0.952733
	NM_131972	39.95	-1.22785		NM_169074	3.0068	0.952426
	NM_136537	7.61518	-1.2277		NM_001260322	3.25428	0.951157
	NM_168737	81.7541	-1.22767		NM_169551	56.4398	0.950943
	NM_057924	8.70909	-1.22756		NM_176242	29.9473	0.950822
	NM_165451	7.40576	-1.22737		NM_168732	25.5657	0.950217
	NM_001260318	5.66626	-1.22658		NM_166639	8.01871	0.950181
	NM_001272729	3.27851	-1.22627		NM_001274241	220.511	0.949676
	NM_137761	15.2994	-1.22553		NM_134515	51.2916	0.946702
	NM_136511	14.671	-1.22503		NM_080377	235.555	0.944594
	NM_001103703	93.636	-1.22372		NR_133336	16.2501	0.943565
	NM_001259995	9.54705	-1.22284		NM_169859	356.538	0.942818
	NM_140477	11.3965	-1.22277		NM_135470	2.13255	0.941994
	NM_168802	4247.79	-1.22161		NM_136887	1941.7	0.94193
	NM_132566	23.2152	-1.22003		NR_124573	3.37741	0.940286
	NM_001275804	46.712	-1.21953		NM_135532	2397.76	0.939869
	NM_139468	22.6647	-1.21919		NM_135803	11.4811	0.938852
	NR_047944	9.8864	-1.21845		NM_057875	2557.45	0.938248
	NM_001297981	8.65906	-1.21764		NM_142000	32.9549	0.938126
	NM_001299768	11.7228	-1.21702		NR_003747	3.89228	0.937568
	NM_078676	8.52951	-1.21648		NM_176042	3027.12	0.937525
	NM_140302	23.1221	-1.21522		NM_001272412	64.4739	0.936463
	NM_167558	6.43169	-1.21357		NR_003873	30.7019	0.935956
	NM_137241	6.25816	-1.21255		NM_001298707	8.83461	0.933253
	NM_132767	18.8254	-1.21136		NM_001104030	3691.41	0.932309
	NR_123821	103.916	-1.20941		NM_140316	75.9129	0.932289
	NM_141540	23.9923	-1.20922		NM_137759	12.6568	0.931735
	NM_166928	5.93189	-1.20835		NM_001382068	2.24635	0.930545
	NM_001273314	11.6791	-1.2081		NM_140364	21.9942	0.929761
	NM_079076	28.7162	-1.20457		NM_142005	4179.91	0.929043
	NM_137958	18.6517	-1.2031		NM_078645	38086.6	0.928835
	NM_137491	12.1498	-1.20288		NM_001298395	8.29897	0.928387
	NM_001275566	7.37843	-1.19959		NM_139621	9181.73	0.92703
	NR_133456	65.1316	-1.19853		NR_124668	29.541	0.925685
	NM_206213	4.66105	-1.19806		NM_131945	13.2831	0.92536
	NM_143694	65.6035	-1.19797		NM_001316437	24.7999	0.92307
	NM_140938	3.52872	-1.196		NM_169821	64.8855	0.923055
	NM_001272561	48.3709	-1.19594		NM_135961	1034.53	0.918194
	NM_001202168	28.3369	-1.1957		NM_057773	21.7249	0.91815
	NM_001104314	9.53947	-1.1926		NM_001273626	9.71095	0.918119
	NM_137226	3.31692	-1.19169		NM_166217	1.38911	0.917791
	NM_132107	162.768	-1.19114		NR_133223	2.5246	0.91387
	NR_003796	15.9145	-1.18935		NM_001169668	2.78837	0.913814
	NM_137538	18.2484	-1.18916		NM_001274943	335.18	0.912334
	NM_078910	70.6863	-1.18873		NM_080714	73.0953	0.912124
	NM_136758	40.064	-1.1861		NM_168444	15696.4	0.911906
	NM_001300701	17.7509	-1.18524		NM_001259861	3357.81	0.909135
	NM_001260371	41.8906	-1.18494		NM_136773	8.74971	0.908589
	NM_079007	5.07249	-1.18477		NM_141894	26.2287	0.90769
	NM_140822	8.90076	-1.18429		NM_144298	3089.24	0.907436
	NM_134812	359.236	-1.18425		NM_135520	1528.94	0.907374
	NM_001103397	12.5399	-1.18227		NM_137296	3.25723	0.907037
	NM_080091	118.12	-1.1818		NM_001144701	2.67732	0.906858
	NR_124551	30.5774	-1.18146		NM_001300426	3.71337	0.906853
	NM_167237	45.97	-1.18064		NM_140395	569.231	0.906747
	NM_001038805	3.37274	-1.17963		NM_135892	980.263	0.9067
	NM_142221	214.619	-1.17902		NR_124041	2.46949	0.906671
	NM_079813	23.5102	-1.17487		NM_141331	8.38648	0.905939
	NM_136471	68.4915	-1.17476		NM_138148	2.36661	0.905604
	NM_136146	16.0925	-1.17352		NM_135395	1751.27	0.905149
	NM_137777	17.0127	-1.17321		NM_001274979	12.518	0.904027
	NM_141652	12.5152	-1.16999		NM_166477	94.394	0.901862
	NM_001042892	74.1043	-1.16991		NM_001272244	2.34182	0.900562
	NM_141021	26.6667	-1.16508
	NM_001258487	32.5074	-1.16364
	NM_134573	153.123	-1.16338
	NM_205996	156.175	-1.1611
	NM_001038784	17.7714	-1.1594
	NM_079828	3.21294	-1.15935
	NM_144351	418.603	-1.15658
	NM_141882	5411.53	-1.15578
	NM_132969	4.47491	-1.15287
	NM_001273862	2.97899	-1.15272
	NM_144312	10.2322	-1.15267
	NM_136783	7.27317	-1.15194
	NR_133288	4.68953	-1.14996
	NM_165246	3.59606	-1.1495
	NM_001299829	11.894	-1.14932
	NM_001258876	9.4473	-1.14866
	NM_078989	24.1751	-1.14705
	NM_164918	43.822	-1.14465
	NM_001014479	7.4583	-1.14408
	NM_142943	4.77798	-1.14147
	NM_001144425	24.3717	-1.14064
	NM_057270	567.84	-1.13931
	NM_001201764	16.281	-1.13875
	NM_057983	33.4276	-1.13794
	NM_001202315	9.11003	-1.13769
	NM_140609	2813.1	-1.13753
	NR_133060	9.19529	-1.13709
	NM_078963	2.93774	-1.13683
	NR_073748	3.45094	-1.13621
	NM_001259683	4779.94	-1.13511
	NM_167337	14.6445	-1.1351
	NR_133255	8.5371	-1.1327
	NM_137832	20.3901	-1.12951
	NM_001276077	9.42856	-1.12942
	NM_001202003	3.95197	-1.12885
	NR_002130	8.05704	-1.12821
	NM_140767	1382.42	-1.12816
	NM_170556	10.0225	-1.12756
	NR_124512	55.9486	-1.12649
	NM_132457	86.8789	-1.12583
	NM_001275826	16.5891	-1.12558
	NR_125147	3.22544	-1.12474
	NM_136679	138.608	-1.1244
	NM_140449	7.68293	-1.11912
	NM_168276	138.582	-1.11759
	NR_073659	12.3415	-1.11713
	NM_057515	68.9292	-1.11642
	NM_001272295	276.749	-1.11618
	NM_142899	16.44	-1.11519
	NR_073690	3.90495	-1.11516
	NM_168021	50.0926	-1.11354
	NM_141883	3012.69	-1.11302
	NM_001297902	4.41787	-1.11124
	NM_079574	297.939	-1.1103
	NM_001259361	8.57321	-1.10879
	NM_141918	11.7996	-1.10852
	NM_144208	8.23872	-1.10836
	NR_074023	16.8925	-1.10489
	NM_079568	141.526	-1.10425
	NM_001144743	17.1452	-1.10324
	NM_143323	50.8029	-1.10317
	NM_130707	3.70269	-1.10277
	NM_135015	40.5975	-1.10241
	NM_142683	10.213	-1.10214
	NM_137184	47.1003	-1.10208
	NM_142918	8.69731	-1.10108
	NM_168009	27.7902	-1.10023
	NM_134959	186.951	-1.09979
	NM_142366	219.757	-1.09967
	NM_001144406	5.35285	-1.0995
	NM_139643	166.86	-1.09753
	NM_001272607	47.0842	-1.09546
	NM_165005	35.9804	-1.09532
	NR_133254	24.2741	-1.09491
	NM_169889	62.3076	-1.09438
	NM_001104074	3.52125	-1.09381
	NM_175972	5.19384	-1.09335
	NM_132038	9.95906	-1.09335
	NM_057970	110.659	-1.09314
	NM_001298240	11.1223	-1.09251
	NM_001260262	23.7839	-1.09073
	NM_080316	112.918	-1.08953
	NM_001316640	5.01492	-1.08905
	NM_001260178	44.8931	-1.08901
	NM_132748	3.91022	-1.08829
	NM_057280	39.8474	-1.08776
	NM_001103860	18.5499	-1.08667
	NM_137852	47.0988	-1.08662
	NM_169611	53.4986	-1.08658
	NM_164693	7.48022	-1.08636
	NM_139641	3.22231	-1.08595
	NM_142619	7.36951	-1.08452
	NM_057612	5.53293	-1.08345
	NR_133290	3.82667	-1.08262
	NM_001144620	4.64285	-1.08254
	NM_166807	21.0856	-1.0808
	NM_001103992	29.7531	-1.08017
	NR_002104	51.1499	-1.07951
	NM_078909	119.408	-1.07673
	NM_133139	244.139	-1.0759
	NM_143729	10.2714	-1.07421
	NM_164578	9.56077	-1.07401
	NM_001258516	29.5055	-1.07135
	NM_142290	6.75503	-1.07103
	NR_124307	27.6558	-1.07086
	NR_074052	14.8438	-1.07061
	NM_001259993	121.184	-1.0702
	NM_001273597	89.7343	-1.06867
	NR_124352	49.0546	-1.06778
	NM_001299507	8.83086	-1.06737
	NM_001273917	4.27525	-1.06672
	NM_136715	38.7146	-1.0667
	NM_057351	599.953	-1.0657
	NM_078705	14.4806	-1.06542
	NM_143214	21.6774	-1.06411
	NM_143339	131.612	-1.06359
	NM_001300449	3.0707	-1.06329
	NM_168747	346.655	-1.06165
	NM_135720	50.0492	-1.05951
	NM_080260	14.0769	-1.05883
	NM_001043252	10.8	-1.05873
	NR_123954	17.5615	-1.0576
	NM_132576	3.11798	-1.0568
	NM_001260311	6.11872	-1.05552
	NM_078638	30.1953	-1.05497
	NM_137385	75.9746	-1.05478
	NM_135293	15.7246	-1.05476
	NM_001297936	16.7857	-1.05475
	NM_057627	13.9663	-1.0545
	NM_140667	13.6899	-1.05366
	NM_001260032	4.34916	-1.0519
	NM_170555	22.7502	-1.05182
	NM_136804	50.7666	-1.05142
	NM_080485	25.4762	-1.05054
	NM_001103856	2.915	-1.05004
	NM_001258532	23.9923	-1.04822
	NM_058067	31.6434	-1.04591
	NM_142795	13.0248	-1.04573
	NM_206256	205.601	-1.04522
	NM_166042	26.3901	-1.0448
	NM_142117	6.44262	-1.04403
	NM_136726	44.0312	-1.0434
	NM_176735	41.7078	-1.04285
	NM_131938	12.1282	-1.04246
	NM_206420	29.6112	-1.04179
	NM_141237	14.0595	-1.04175
	NM_166584	40.2382	-1.04158
	NM_001274767	14.1138	-1.03918
	NM_057258	10.9417	-1.03893
	NM_142173	31.6134	-1.03888
	NM_137042	18.6011	-1.03859
	NM_168746	234.836	-1.0382
	NM_141300	9.27997	-1.03661
	NM_166128	38.5582	-1.03607
	NR_124960	4.29544	-1.03582
	NM_142939	2139.15	-1.03369
	NM_132953	90.5532	-1.03277
	NM_140408	1407.44	-1.03208
	NM_079058	16.3563	-1.03181
	NM_142954	1032.48	-1.03097
	NM_079428	50.4778	-1.03041
	NR_123897	11.1836	-1.02907
	NM_001014511	6.4766	-1.02899
	NM_165675	2.77637	-1.02842
	NM_001274575	14.2538	-1.0284
	NM_001299983	3.1135	-1.02825
	NM_140422	7.37245	-1.02819
	NM_001202313	56.3636	-1.02788
	NR_047718	5.16365	-1.02675
	NR_073838	58.5907	-1.02674
	NM_142916	13.4575	-1.02534
	NM_001273681	12.5389	-1.02531
	NM_142165	639.927	-1.02522
	NR_167841	22.5211	-1.0237
	NM_001274239	6.1305	-1.02275
	NR_123846	49.8121	-1.02168
	NM_001297989	1656.74	-1.02094
	NM_133026	9.63113	-1.02032
	NM_001299692	16.899	-1.02029
	NM_131981	8.82495	-1.01981
	NM_001031872	48.1208	-1.01881
	NM_001258609	18.7662	-1.01835
	NM_137206	37.1188	-1.01684
	NR_133261	14.5337	-1.0167
	NR_048127	2.96174	-1.01659
	NM_079613	60.6631	-1.01574
	NR_073767	6.73363	-1.0157
	NM_001144426	53.4255	-1.01526
	NR_124388	10.0909	-1.01501
	NM_135252	18.7132	-1.01489
	NM_168710	8.5835	-1.01489
	NM_136467	23.5914	-1.01423
	NM_168638	2.60728	-1.01403
	NM_139387	89.5316	-1.01302
	NM_001202118	1049.88	-1.0114
	NM_133014	26.7936	-1.01137
	NM_001103759	32.8297	-1.01098
	NM_001031972	2.87329	-1.01038
	NM_137032	164.355	-1.01017
	NM_169447	78.7824	-1.00977
	NM_140189	13.1716	-1.00938
	NM_206394	59.2509	-1.00701
	NM_139596	304.008	-1.00643
	NM_001259955	8.27744	-1.00596
	NM_057293	6.67723	-1.00536
	NM_164711	5.10028	-1.00535
	NM_141281	3.57248	-1.00492
	NM_057357	54.1678	-1.00448
	NM_169583	2.97084	-1.00353
	NR_073885	53.6458	-1.00299
	NR_133307	50.5605	-1.00293
	NM_001032084	75.9242	-1.00181
	NM_130717	24.1214	-1.00085
	NM_169451	4.5649	-1.00003
	NM_078706	20.3075	-0.999334
	NM_001169414	181.544	-0.998964
	NM_001273835	114.633	-0.997965
	NM_166304	8.43903	-0.996863
	NM_166264	6.29837	-0.996757
	NM_130557	420.864	-0.996355
	NM_001103907	192.842	-0.995618
	NM_143497	8.5633	-0.995204
	NR_124543	27.0922	-0.995019
	NM_001272124	8.9908	-0.99405
	NM_166904	34.6174	-0.994013
	NR_124439	24.7261	-0.993133
	NM_168040	25.747	-0.992657
	NM_141313	5.6763	-0.991837
	NM_206407	13.6557	-0.991314
	NM_140833	7.33713	-0.991098
	NM_143457	48.8948	-0.988626
	NM_001144741	7.14619	-0.988033
	NM_139717	230.96	-0.986288
	NM_080314	11.9074	-0.985936
	NM_131982	261.816	-0.984997
	NM_140845	3.86924	-0.983643
	NM_001300646	94.599	-0.983384
	NM_001297917	56.2469	-0.982606
	NM_135859	174.938	-0.982394
	NM_166160	5.53774	-0.98196
	NR_123869	13.9118	-0.981878
	NM_001259343	174.623	-0.981757
	NM_001300215	7.25463	-0.981386
	NM_001260239	60.0326	-0.980859
	NM_132632	40.3485	-0.980734
	NM_001169709	37.6824	-0.980701
	NM_168124	172.519	-0.979575
	NM_166473	104.866	-0.979477
	NM_143523	5.31727	-0.979206
	NM_170449	10.4163	-0.97895
	NM_078820	111.122	-0.978884
	NM_001259651	100.374	-0.978586
	NM_001273831	23.6629	-0.977441
	NM_078897	8.52105	-0.977228
	NM_001258889	13.4679	-0.975889
	NM_164790	401.841	-0.97584
	NR_133418	47.331	-0.975179
	NM_165048	6.09478	-0.975103
	NM_176211	34.1859	-0.974761
	NR_125006	114.845	-0.972789
	NM_143615	56.177	-0.972398
	NM_132610	9.94509	-0.972036
	NM_001014558	33.7075	-0.971826
	NM_141332	2.46082	-0.971187
	NM_134679	8.70891	-0.970222
	NM_142429	38.8525	-0.969666
	NM_001104123	6.11506	-0.969615
	NM_001299342	7.57233	-0.969584
	NM_001274580	5.56431	-0.969146
	NR_167851	101.724	-0.968897
	NM_136373	9.48644	-0.9683
	NR_133388	4.58239	-0.967858
	NM_136328	9.57089	-0.96645
	NM_136011	47.9886	-0.966396
	NR_125050	8.50579	-0.966188
	NM_139684	17.717	-0.966055
	NM_135676	159.331	-0.965363
	NM_057229	740.724	-0.965084
	NM_001273365	30.467	-0.964592
	NM_137689	85.9679	-0.964423
	NM_001299366	85.6115	-0.963984
	NM_001298051	45.3866	-0.963845
	NM_142076	24.1697	-0.963818
	NM_001273742	2.61296	-0.963661
	NM_135474	59.2574	-0.963441
	NM_167599	1.79704	-0.962993
	NM_165987	337.247	-0.962447
	NM_136949	25.5377	-0.962391
	NM_137098	50.0109	-0.96162
	NM_132551	3.81278	-0.960469
	NM_079779	2.75425	-0.960068
	NM_080162	123.666	-0.959972
	NM_079644	13.2786	-0.959587
	NM_001298387	4.98234	-0.959319
	NR_124406	2.40856	-0.958979
	NM_001259983	16.2398	-0.957508
	NM_001272338	294.017	-0.95735
	NR_133466	6.24513	-0.957158
	NM_165250	6.71118	-0.957052
	NM_001273519	8.33434	-0.957007
	NM_001273731	3.39872	-0.956711
	NM_139398	4.76777	-0.956205
	NM_167349	53.5122	-0.95586
	NM_135838	28.0699	-0.953206
	NR_002480	5.75383	-0.953101
	NM_144362	2.71479	-0.952464
	NR_074013	121.406	-0.95241
	NR_124549	15.8741	-0.952282
	NM_139775	4.23083	-0.952038
	NM_001201990	251.399	-0.951846
	NR_047747	15.4798	-0.950475
	NM_140403	23.8734	-0.950338
	NM_001260397	8.74029	-0.950214
	NM_136963	7.5222	-0.950028
	NM_001298371	17.9335	-0.949253
	NR_124898	10.3793	-0.948664
	NM_001298277	8.16395	-0.948286
	NM_170145	22.0052	-0.947714
	NR_047813	65.6597	-0.947381
	NM_133066	3.05422	-0.94556
	NM_001274550	11.7071	-0.944823
	NM_166320	36.4674	-0.944773
	NM_144160	818.486	-0.944452
	NM_001369977	25.4551	-0.944359
	NM_001272936	9.35582	-0.943346
	NM_001276171	36.5916	-0.942899
	NM_141961	3.48469	-0.942103
	NM_141723	6.24131	-0.942035
	NM_001170220	4.94314	-0.941587
	NR_047943	10.2905	-0.941502
	NM_169493	5.73149	-0.940999
	NM_168422	8.8825	-0.940099
	NM_206209	2.79419	-0.94009
	NM_143350	117.427	-0.939522
	NM_001259659	6.51627	-0.938746
	NM_001201786	11.1424	-0.938631
	NM_001297880	5.71681	-0.937904
	NM_001298894	25.6756	-0.937595
	NM_001259054	260.987	-0.937573
	NM_001103718	5.07707	-0.937524
	NR_133527	22.6554	-0.937022
	NR_073676	18.9413	-0.936919
	NM_001274984	3.20977	-0.936718
	NM_132833	4.22282	-0.936565
	NR_125026	6.00966	-0.936248
	NM_143256	7.59578	-0.936158
	NM_001274779	7.16158	-0.936128
	NM_001038794	20.0331	-0.936026
	NM_140301	65.6622	-0.935921
	NR_001761	14.9556	-0.935305
	NR_133175	52.8595	-0.935157
	NR_133407	53.8114	-0.934989
	NR_048218	6.96686	-0.934184
	NM_001103854	6.15555	-0.933487
	NM_168056	22.1318	-0.932927
	NM_137976	14.4673	-0.932874
	NM_142070	6.08442	-0.932751
	NR_125187	24.7971	-0.932613
	NM_001259180	2.53225	-0.932584
	NM_001104026	211.549	-0.932448
	NM_134595	11.5274	-0.931376
	NM_057343	133.804	-0.931002
	NM_168756	43.8656	-0.930195
	NM_142089	41.7341	-0.929928
	NM_001299828	8.4622	-0.929447
	NM_140467	19.3906	-0.929143
	NM_141885	16.9848	-0.927084
	NR_133412	265.572	-0.925447
	NM_206483	48.0949	-0.925358
	NM_001273685	3.26617	-0.924782
	NM_001014747	6.81258	-0.92394
	NM_167602	6.78388	-0.923817
	NM_143446	16.3757	-0.923767
	NM_001259210	28.1141	-0.921239
	NM_165587	10.4411	-0.920967
	NM_079857	42.7539	-0.920391
	NM_001104351	920.454	-0.920158
	NR_133104	70.0397	-0.919849
	NM_134875	22.284	-0.919065
	NM_079747	361.185	-0.918947
	NM_136371	59.1875	-0.916975
	NM_080029	25.2841	-0.91642
	NM_001038752	1.36941	-0.916404
	NM_132062	8.95838	-0.915647
	NM_134890	26.5364	-0.914483
	NM_078580	19.0196	-0.914136
	NM_140152	20.5746	-0.913879
	NM_164996	6.01253	-0.913022
	NM_001275793	15.3676	-0.912899
	NM_167121	660.638	-0.911863
	NM_001202345	11.3653	-0.911334
	NM_137458	28.4871	-0.910972
	NM_165954	2.04585	-0.910574
	NR_123979	103.835	-0.909855
	NM_136994	6.8609	-0.909156
	NM_001201613	67.0568	-0.908989
	NM_135348	169.376	-0.908079
	NM_166277	12.0848	-0.90799
	NM_001299404	134.407	-0.906987
	NM_142815	7.55039	-0.906316
	NR_047740	2.41077	-0.905868
	NM_167559	8.56557	-0.905696
	NM_001104198	5.01161	-0.905516
	NM_079006	117.812	-0.90509
	NM_001043085	4.81404	-0.904717
	NM_080021	2.92537	-0.904353
	NM_001273813	10.9051	-0.904332
	NM_001038864	12.7556	-0.904073
	NR_001765	2.26636	-0.903442
	NM_165013	1997.51	-0.903349
	NM_080309	1.44805	-0.902469
	NM_001297899	97.6502	-0.901711
