# Supplementary material for: Orai-mediated calcium entry determines activity of central dopaminergic neurons by regulation of gene expression
Source: eLife. 2024 Jan 30;12:RP88808. doi: 10.7554/eLife.88808 (PMC10945566; doi:10.7554/eLife.88808)
Supplement: Figure 1—figure supplement 9—source data 1. [file elife-88808-fig1-figsupp9-data1.xlsx]

## Sheet: Sheet1
Counts	GT
116185	Control
94926.8	Control
22014	Control
16720.5	Control
23537	Control
15668.2	Control
7935.75	Control
8930.5	Control
6742	Control
13599	Control
5962.5	Control
6119	Control
5567.25	Control
5374	Control
4903.5	Control
12812.8	Control
4783.5	Control
4597	Control
4736	Control
3604.5	Control
3918.5	Control
4053	Control
3651.5	Control
3035	Control
3598.75	Control
3640.5	Control
5319.75	Control
2609	Control
3299.25	Control
1946.75	Control
2683.75	Control
1920	Control
1667.25	Control
1583.75	Control
1758.5	Control
1728.25	Control
1472	Control
1945.75	Control
1922	Control
1653.25	Control
1624.25	Control
1345	Control
1513.25	Control
1651.25	Control
1223.25	Control
1908	Control
1649.25	Control
1158	Control
1193.75	Control
1088.25	Control
1042.25	Control
1036	Control
1008	Control
960.75	Control
940.5	Control
938.5	Control
916.5	Control
884	Control
860.25	Control
857.25	Control
849	Control
815	Control
777.5	Control
775.75	Control
762.75	Control
750.25	Control
735	Control
734.75	Control
712.5	Control
704.75	Control
687.75	Control
685.75	Control
668.25	Control
639.75	Control
639.25	Control
638.25	Control
634.75	Control
624.25	Control
608.25	Control
599	Control
574.75	Control
567.75	Control
565.75	Control
565.5	Control
551.25	Control
547.75	Control
542.75	Control
542.25	Control
541.25	Control
541	Control
524.25	Control
508	Control
497.25	Control
489.5	Control
483.25	Control
481.75	Control
476.75	Control
473.5	Control
470	Control
465.75	Control
458.75	Control
454.5	Control
449	Control
447.75	Control
430.5	Control
427.25	Control
409.75	Control
403.75	Control
400.25	Control
397	Control
396.75	Control
395.75	Control
394.75	Control
393.75	Control
390.75	Control
378.5	Control
371.25	Control
369	Control
365.25	Control
364.25	Control
359.25	Control
354	Control
353.5	Control
352.75	Control
347.75	Control
347.25	Control
337.75	Control
330.25	Control
326.5	Control
324	Control
323.5	Control
320.25	Control
319.25	Control
316.5	Control
315.5	Control
313.75	Control
305.25	Control
303.75	Control
302	Control
301.75	Control
301	Control
298.25	Control
297.25	Control
297.25	Control
295.5	Control
295	Control
292.75	Control
290.75	Control
288.25	Control
285.5	Control
283.75	Control
276.75	Control
276.25	Control
273.5	Control
273	Control
268	Control
264	Control
263	Control
259.75	Control
258	Control
256.5	Control
253.5	Control
253	Control
252.5	Control
245.25	Control
244.25	Control
242.75	Control
241.25	Control
241	Control
236.25	Control
225.75	Control
224	Control
223.75	Control
223.25	Control
222.5	Control
222.25	Control
222.25	Control
222	Control
221	Control
220.5	Control
219	Control
217.75	Control
212.5	Control
210.5	Control
210	Control
209.5	Control
207.25	Control
201	Control
201	Control
198	Control
195.75	Control
195.5	Control
193.75	Control
192.25	Control
187.75	Control
187.25	Control
185	Control
184	Control
183.5	Control
181.25	Control
180.5	Control
178.5	Control
176.5	Control
175.75	Control
175.75	Control
174.75	Control
173.25	Control
172.75	Control
171.75	Control
170.75	Control
169	Control
167.75	Control
165.25	Control
165	Control
164.5	Control
159.75	Control
157.75	Control
156	Control
155.75	Control
154.75	Control
154	Control
152	Control
151.5	Control
151.5	Control
150	Control
149.25	Control
148.5	Control
148.5	Control
143.75	Control
143	Control
142.5	Control
140.25	Control
139.75	Control
139.75	Control
139.5	Control
139.25	Control
137.25	Control
136.75	Control
132.75	Control
129.75	Control
129.5	Control
129.5	Control
127.75	Control
127.25	Control
127	Control
126.75	Control
126.75	Control
126.25	Control
125.5	Control
124.75	Control
124.5	Control
124.5	Control
124	Control
123.5	Control
122.75	Control
122.75	Control
122.5	Control
120.5	Control
120.25	Control
120.25	Control
119.5	Control
119	Control
118	Control
117.5	Control
117.25	Control
117	Control
116.25	Control
114.75	Control
113.25	Control
113.25	Control
112	Control
111	Control
109.75	Control
109.5	Control
109.25	Control
108.25	Control
108	Control
107.5	Control
107.25	Control
106.5	Control
106.25	Control
105.5	Control
105	Control
104.75	Control
104	Control
104	Control
103.5	Control
103.25	Control
102.25	Control
101.5	Control
101	Control
101	Control
100	Control
99.75	Control
99.75	Control
98.25	Control
98.25	Control
97.25	Control
96.5	Control
96	Control
95.5	Control
95.25	Control
95	Control
95	Control
94.75	Control
94.75	Control
94.5	Control
94.25	Control
94	Control
93.25	Control
93	Control
92	Control
92	Control
91.5	Control
91.5	Control
91.5	Control
91	Control
90.75	Control
90.75	Control
88.25	Control
88	Control
87.5	Control
87.25	Control
87.25	Control
87	Control
86	Control
86	Control
85.75	Control
85.5	Control
84.5	Control
83.75	Control
82.75	Control
80	Control
79.75	Control
78.75	Control
78.5	Control
77.5	Control
77.5	Control
77.5	Control
76	Control
75.25	Control
75	Control
75	Control
74.75	Control
74.25	Control
73	Control
73	Control
73	Control
71.25	Control
71	Control
70.75	Control
69.75	Control
69.25	Control
69	Control
69	Control
68.75	Control
68.75	Control
68.5	Control
68	Control
67.25	Control
67	Control
67	Control
66.5	Control
66	Control
65.5	Control
65	Control
64.25	Control
64	Control
63.75	Control
63	Control
62.5	Control
60.75	Control
59.75	Control
59.5	Control
59.5	Control
59.25	Control
59	Control
59	Control
58.75	Control
58.5	Control
58.25	Control
58	Control
58	Control
57.75	Control
57.25	Control
56.75	Control
56.5	Control
56.5	Control
55.75	Control
55.25	Control
55.25	Control
55.25	Control
54.75	Control
54	Control
54	Control
53.25	Control
53	Control
53	Control
52.75	Control
52	Control
52	Control
51.5	Control
51.25	Control
51	Control
51	Control
50.75	Control
50.5	Control
50.25	Control
50.25	Control
49.25	Control
48.75	Control
48.5	Control
48.5	Control
48.25	Control
48.25	Control
48	Control
48	Control
47.25	Control
47	Control
46.5	Control
46	Control
45.75	Control
45.5	Control
45.5	Control
45.5	Control
45.25	Control
45.25	Control
45.25	Control
45	Control
45	Control
44.5	Control
44.5	Control
44.25	Control
44.25	Control
43.75	Control
43.5	Control
43.5	Control
43.25	Control
43.25	Control
42.5	Control
42	Control
42	Control
42	Control
42	Control
41.75	Control
41.25	Control
41	Control
41	Control
40.75	Control
40.5	Control
40.5	Control
40	Control
39.75	Control
39.75	Control
39.5	Control
39.5	Control
39	Control
38.75	Control
38.5	Control
38	Control
37.5	Control
37.25	Control
37.25	Control
37.25	Control
37.25	Control
37	Control
37	Control
36.25	Control
36.25	Control
36.25	Control
36	Control
35.75	Control
35.75	Control
35.5	Control
35.25	Control
35	Control
35	Control
35	Control
34.5	Control
34.25	Control
34.25	Control
34	Control
34	Control
34	Control
33.5	Control
33.5	Control
33.5	Control
33.25	Control
33	Control
33	Control
33	Control
32.75	Control
32.25	Control
32.25	Control
32	Control
32	Control
32	Control
32	Control
32	Control
32	Control
32	Control
31.75	Control
31.5	Control
31.5	Control
31.25	Control
31	Control
31	Control
31	Control
31	Control
31	Control
31	Control
30.75	Control
30.75	Control
30.5	Control
30.25	Control
30	Control
30	Control
30	Control
29.75	Control
29.75	Control
29.75	Control
29.75	Control
29.75	Control
29.5	Control
29.5	Control
29	Control
29	Control
29	Control
29	Control
28.75	Control
28.5	Control
28.5	Control
28.5	Control
28.25	Control
28.25	Control
28.25	Control
28	Control
28	Control
28	Control
28	Control
27.5	Control
27.5	Control
27.5	Control
27.25	Control
27.25	Control
27	Control
27	Control
27	Control
27	Control
26.75	Control
26.5	Control
26.5	Control
26.5	Control
26.25	Control
26	Control
26	Control
26	Control
26	Control
25.5	Control
25.25	Control
25.25	Control
25	Control
25	Control
24.75	Control
24.75	Control
24.75	Control
24.5	Control
24.5	Control
24.25	Control
24.25	Control
24.25	Control
24	Control
24	Control
24	Control
24	Control
24	Control
24	Control
23.5	Control
23.5	Control
23.5	Control
23.5	Control
23.25	Control
23.25	Control
23	Control
23	Control
23	Control
23	Control
23	Control
23	Control
22.75	Control
22.75	Control
22.75	Control
22.5	Control
22.5	Control
22	Control
22	Control
22	Control
22	Control
22	Control
22	Control
22	Control
22	Control
22	Control
22	Control
22	Control
21.75	Control
21.5	Control
21.5	Control
21.5	Control
21.5	Control
21.25	Control
21.25	Control
21	Control
21	Control
21	Control
21	Control
20.75	Control
20.75	Control
20.5	Control
20.5	Control
20.5	Control
20.5	Control
20.25	Control
20	Control
20	Control
20	Control
20	Control
20	Control
20	Control
20	Control
19.75	Control
19.75	Control
19.5	Control
19.5	Control
19.5	Control
19.5	Control
19.5	Control
19.5	Control
19.25	Control
19.25	Control
19.25	Control
19	Control
19	Control
19	Control
19	Control
19	Control
19	Control
19	Control
19	Control
18.75	Control
18.5	Control
18.5	Control
18.5	Control
18.5	Control
18.5	Control
18.5	Control
18.25	Control
18.25	Control
18.25	Control
18	Control
18	Control
18	Control
17.75	Control
17.75	Control
17.75	Control
17.75	Control
17.5	Control
17.5	Control
17.5	Control
17.25	Control
17.25	Control
17.25	Control
17	Control
17	Control
17	Control
16.75	Control
16.5	Control
16.5	Control
16.5	Control
16.5	Control
16.25	Control
16.25	Control
16.25	Control
16.25	Control
16.25	Control
16	Control
16	Control
16	Control
16	Control
16	Control
15.75	Control
15.75	Control
15.5	Control
15.5	Control
15.5	Control
15.25	Control
15	Control
15	Control
15	Control
15	Control
15	Control
15	Control
15	Control
14.75	Control
14.5	Control
14.5	Control
14.5	Control
14.25	Control
14.25	Control
14.25	Control
14.25	Control
14	Control
14	Control
14	Control
14	Control
13.75	Control
13.5	Control
13.5	Control
13.5	Control
13.25	Control
13.25	Control
13.25	Control
13.25	Control
13	Control
13	Control
12.5	Control
12.5	Control
12.5	Control
12.5	Control
12.25	Control
12.25	Control
12.25	Control
12.25	Control
12	Control
12	Control
12	Control
12	Control
11.75	Control
11.75	Control
11.5	Control
11.5	Control
11	Control
11	Control
11	Control
11	Control
11	Control
11	Control
11	Control
10.75	Control
10.75	Control
10.75	Control
10.5	Control
10.5	Control
10.5	Control
10.5	Control
10.5	Control
10.5	Control
10.5	Control
10.25	Control
10.25	Control
10	Control
10	Control
10	Control
10	Control
10	Control
9.75	Control
9.75	Control
9.75	Control
9.5	Control
9.5	Control
9.5	Control
9.5	Control
9.25	Control
9.25	Control
9.25	Control
9	Control
9	Control
9	Control
9	Control
9	Control
9	Control
8.75	Control
8.75	Control
8.75	Control
8.5	Control
8.5	Control
8.5	Control
8.5	Control
8.5	Control
8.5	Control
8.5	Control
8.5	Control
8.25	Control
8.25	Control
8	Control
8	Control
8	Control
8	Control
8	Control
8	Control
7.75	Control
7.75	Control
7.5	Control
7.5	Control
7.5	Control
7.5	Control
7.5	Control
7.5	Control
7.25	Control
7.25	Control
7.25	Control
7.25	Control
7.25	Control
7.25	Control
7	Control
7	Control
7	Control
7	Control
7	Control
7	Control
7	Control
7	Control
7	Control
7	Control
6.75	Control
6.75	Control
6.75	Control
6.5	Control
6.5	Control
6.5	Control
6.5	Control
6.25	Control
6.25	Control
6.25	Control
6.25	Control
6.25	Control
6.25	Control
6.25	Control
6.25	Control
6.25	Control
6.25	Control
6.25	Control
6.25	Control
6.25	Control
6	Control
6	Control
6	Control
6	Control
5.75	Control
5.5	Control
5.5	Control
5.5	Control
5.5	Control
5.5	Control
5.5	Control
5.25	Control
5.25	Control
5.25	Control
5.25	Control
5	Control
5	Control
5	Control
5	Control
5	Control
5	Control
5	Control
5	Control
5	Control
5	Control
5	Control
5	Control
4.75	Control
4.75	Control
4.75	Control
4.75	Control
4.75	Control
4.5	Control
4.5	Control
4.5	Control
4.5	Control
4.5	Control
4.25	Control
4.25	Control
4.25	Control
4.25	Control
4	Control
4	Control
4	Control
4	Control
4	Control
4	Control
4	Control
4	Control
4	Control
4	Control
4	Control
4	Control
4	Control
4	Control
4	Control
4	Control
4	Control
4	Control
4	Control
3.75	Control
3.75	Control
3.75	Control
3.75	Control
3.75	Control
3.75	Control
3.75	Control
3.75	Control
3.75	Control
3.75	Control
3.5	Control
3.5	Control
3.5	Control
3.5	Control
3.5	Control
3.5	Control
3.5	Control
3.5	Control
3.5	Control
3.5	Control
3.5	Control
3.5	Control
3.5	Control
3.5	Control
3.5	Control
3.5	Control
3.5	Control
3.5	Control
3.5	Control
3.5	Control
3.25	Control
3.25	Control
3.25	Control
3.25	Control
3.25	Control
3.25	Control
3.25	Control
3.25	Control
3.25	Control
3	Control
3	Control
3	Control
3	Control
3	Control
3	Control
3	Control
3	Control
3	Control
3	Control
3	Control
3	Control
3	Control
3	Control
3	Control
3	Control
3	Control
3	Control
3	Control
3	Control
3	Control
2.75	Control
2.75	Control
2.75	Control
2.75	Control
2.75	Control
2.75	Control
2.75	Control
2.75	Control
2.75	Control
2.75	Control
2.75	Control
2.75	Control
2.75	Control
2.75	Control
2.5	Control
2.5	Control
2.5	Control
2.5	Control
2.5	Control
2.5	Control
2.5	Control
2.5	Control
2.5	Control
2.5	Control
2.5	Control
2.5	Control
2.5	Control
2.5	Control
2.5	Control
2.25	Control
2.25	Control
2.25	Control
2.25	Control
2.25	Control
2.25	Control
2.25	Control
2.25	Control
2.25	Control
2.25	Control
2.25	Control
2.25	Control
2.25	Control
2.25	Control
2.25	Control
2.25	Control
2.25	Control
2.25	Control
2	Control
2	Control
2	Control
2	Control
2	Control
2	Control
2	Control
2	Control
2	Control
2	Control
2	Control
2	Control
2	Control
2	Control
2	Control
2	Control
2	Control
2	Control
2	Control
2	Control
2	Control
1.75	Control
1.75	Control
1.75	Control
1.75	Control
1.75	Control
1.75	Control
1.75	Control
1.75	Control
1.75	Control
1.75	Control
1.75	Control
1.75	Control
1.75	Control
1.75	Control
1.75	Control
1.75	Control
1.75	Control
1.75	Control
1.75	Control
1.75	Control
1.5	Control
1.5	Control
1.5	Control
1.5	Control
1.5	Control
1.5	Control
1.5	Control
1.5	Control
1.5	Control
1.5	Control
1.5	Control
1.5	Control
1.5	Control
1.5	Control
1.5	Control
1.5	Control
1.5	Control
1.5	Control
1.5	Control
1.5	Control
1.5	Control
1.5	Control
1.5	Control
1.5	Control
1.25	Control
1.25	Control
1.25	Control
1.25	Control
1.25	Control
1.25	Control
1.25	Control
1.25	Control
1.25	Control
1.25	Control
1.25	Control
1.25	Control
1.25	Control
1.25	Control
1.25	Control
1.25	Control
1.25	Control
1.25	Control
1.25	Control
1.25	Control
1.25	Control
1.25	Control
1.25	Control
1.25	Control
1.25	Control
1.25	Control
1.25	Control
1.25	Control
1.25	Control
1.25	Control
1.25	Control
1.25	Control
1.25	Control
1.25	Control
1.25	Control
1.25	Control
1.25	Control
1.25	Control
1.25	Control
1	Control
1	Control
1	Control
1	Control
1	Control
1	Control
1	Control
1	Control
1	Control
1	Control
1	Control
1	Control
1	Control
1	Control
1	Control
1	Control
1	Control
1	Control
1	Control
1	Control
1	Control
1	Control
1	Control
1	Control
1	Control
0.75	Control
0.75	Control
0.75	Control
0.75	Control
0.75	Control
0.75	Control
0.75	Control
0.75	Control
0.75	Control
0.75	Control
0.75	Control
0.75	Control
0.5	Control
0.5	Control
0.5	Control
0.5	Control
0.5	Control
0.5	Control
0.5	Control
0.5	Control
0.5	Control
0.5	Control
0.5	Control
0.5	Control
0.5	Control
0.5	Control
0.5	Control
0.5	Control
0.5	Control
0.5	Control
0.5	Control
0.5	Control
0.5	Control
0.5	Control
0.5	Control
0.5	Control
0.5	Control
0.5	Control
0.5	Control
0.5	Control
0.5	Control
0.5	Control
0.5	Control
0.5	Control
0.5	Control
0.5	Control
0.5	Control
0.5	Control
0.5	Control
0.5	Control
0.5	Control
0.5	Control
0.5	Control
0.5	Control
0.5	Control
0.25	Control
0.25	Control
0.25	Control
0.25	Control
0.25	Control
0.25	Control
0.25	Control
0.25	Control
0.25	Control
0.25	Control
0.25	Control
0.25	Control
0.25	Control
0	Control
0	Control
0	Control
0	Control
0	Control
0	Control
0	Control
0	Control
0	Control
0	Control
0	Control
0	Control
0	Control
0	Control
0	Control
0	Control
0	Control
0	Control
0	Control
0	Control
0	Control
0	Control
0	Control
0	Control
0	Control
0	Control
0	Control
0	Control
0	Control
0	Control
0	Control
0	Control
0	Control
0	Control
0	Control
0	Control
0	Control
0	Control
0	Control
0	Control
0	Control
0	Control
0	Control
0	Control
0	Control
0	Control
0	Control
0	Control
0	Control
0	Control
0	Control
0	Control
0	Control
0	Control
0	Control
0	Control
0	Control
0	Control
0	Control
0	Control
0	Control
0	Control
0	Control
0	Control
0	Control
0	Control
0	Control
0	Control
0	Control
0	Control
0	Control
0	Control
0	Control
0	Control
0	Control
0	Control
0	Control
0	Control
0	Control
0	Control
0	Control
871.75	E180A
16143.8	E180A
344.5	E180A
4661.75	E180A
1408.5	E180A
435	E180A
3850	E180A
2265	E180A
2532.75	E180A
86.25	E180A
10.25	E180A
460.25	E180A
2962.25	E180A
2609.75	E180A
2081.5	E180A
231.75	E180A
737	E180A
139.75	E180A
205	E180A
1.25	E180A
1402	E180A
787.5	E180A
1437	E180A
1301.5	E180A
206.25	E180A
21.25	E180A
435.75	E180A
95.5	E180A
169.75	E180A
315.25	E180A
67.25	E180A
658.5	E180A
704.25	E180A
646.75	E180A
551.75	E180A
676.5	E180A
669.5	E180A
193	E180A
47.25	E180A
671.25	E180A
7.25	E180A
616.5	E180A
699.5	E180A
119.75	E180A
673.5	E180A
250.25	E180A
172.25	E180A
682	E180A
330.75	E180A
21.5	E180A
12	E180A
49.75	E180A
544.25	E180A
414	E180A
503	E180A
187.75	E180A
117.25	E180A
438.5	E180A
405.25	E180A
419.5	E180A
362.75	E180A
477.5	E180A
380	E180A
359.75	E180A
386.75	E180A
37.75	E180A
428	E180A
68.5	E180A
253	E180A
310.25	E180A
166.5	E180A
284.75	E180A
9.75	E180A
275.75	E180A
223.5	E180A
299.25	E180A
182.5	E180A
67.5	E180A
233.25	E180A
283	E180A
278.25	E180A
260.25	E180A
181.5	E180A
267.25	E180A
205.5	E180A
269.5	E180A
54.5	E180A
259.5	E180A
320.5	E180A
34.25	E180A
92.5	E180A
112.75	E180A
159.75	E180A
21.25	E180A
176.25	E180A
248	E180A
236.5	E180A
77.25	E180A
21.5	E180A
18.75	E180A
221	E180A
141.25	E180A
101.5	E180A
220.25	E180A
29	E180A
173	E180A
19	E180A
181	E180A
192.25	E180A
167.5	E180A
118.25	E180A
91.5	E180A
41.75	E180A
11.5	E180A
0	E180A
185	E180A
67.5	E180A
160.75	E180A
158	E180A
33.5	E180A
134.5	E180A
180	E180A
172.75	E180A
115.25	E180A
77.5	E180A
100.25	E180A
58.5	E180A
180.5	E180A
33.75	E180A
74	E180A
108.5	E180A
42.5	E180A
134.25	E180A
66.25	E180A
11.75	E180A
108.25	E180A
93.25	E180A
47.5	E180A
111.5	E180A
142.75	E180A
132.5	E180A
1.75	E180A
126.25	E180A
131.75	E180A
83.25	E180A
144	E180A
119.75	E180A
75.25	E180A
101.5	E180A
103.75	E180A
55.25	E180A
82.75	E180A
128	E180A
142	E180A
251.5	E180A
137.75	E180A
71.75	E180A
111.75	E180A
15	E180A
7.5	E180A
101	E180A
44	E180A
95.5	E180A
128.25	E180A
81.75	E180A
105.5	E180A
116.25	E180A
114	E180A
115	E180A
100.5	E180A
1	E180A
79.5	E180A
124.5	E180A
116	E180A
38	E180A
2.5	E180A
113.25	E180A
115	E180A
79.25	E180A
110.5	E180A
19.75	E180A
9.5	E180A
88.5	E180A
58.75	E180A
19.75	E180A
21.5	E180A
104.75	E180A
59	E180A
95.25	E180A
47.25	E180A
44.5	E180A
126.5	E180A
48	E180A
121.25	E180A
18.5	E180A
33.5	E180A
76.25	E180A
38.5	E180A
87.5	E180A
86	E180A
5.75	E180A
83	E180A
7.5	E180A
0	E180A
19.25	E180A
90.25	E180A
24.75	E180A
81	E180A
29.25	E180A
33.25	E180A
44.75	E180A
20.75	E180A
50.75	E180A
109.25	E180A
80.75	E180A
64	E180A
13	E180A
40.25	E180A
65.5	E180A
31.75	E180A
0.5	E180A
4.25	E180A
29.5	E180A
90	E180A
73.25	E180A
10.5	E180A
30.5	E180A
82.5	E180A
16.75	E180A
19	E180A
0	E180A
8	E180A
4.5	E180A
23	E180A
64.5	E180A
37.75	E180A
19	E180A
57.5	E180A
21.75	E180A
48.25	E180A
19.75	E180A
68.75	E180A
18.25	E180A
74.25	E180A
43.5	E180A
0.5	E180A
13.5	E180A
65.25	E180A
17.5	E180A
65.75	E180A
35.75	E180A
47.25	E180A
11	E180A
7	E180A
56.75	E180A
45.25	E180A
13	E180A
0	E180A
0.5	E180A
0.75	E180A
51.25	E180A
23.25	E180A
13.25	E180A
27	E180A
63.5	E180A
50	E180A
15.5	E180A
49	E180A
16	E180A
38.5	E180A
17.5	E180A
26	E180A
26.75	E180A
15.75	E180A
6.5	E180A
37.25	E180A
0	E180A
4.75	E180A
55.25	E180A
5.5	E180A
0.25	E180A
44	E180A
42	E180A
20.25	E180A
0.75	E180A
40.25	E180A
0.5	E180A
38.25	E180A
0	E180A
0	E180A
35.5	E180A
51.75	E180A
15.5	E180A
0	E180A
0	E180A
0	E180A
42.75	E180A
10.5	E180A
10	E180A
7.5	E180A
0	E180A
45.75	E180A
0.5	E180A
22.75	E180A
5.5	E180A
33	E180A
56.25	E180A
32	E180A
11.25	E180A
0	E180A
39	E180A
0	E180A
51	E180A
3.25	E180A
31	E180A
36.5	E180A
8.5	E180A
26.25	E180A
34.25	E180A
49.25	E180A
16	E180A
6.25	E180A
11.25	E180A
7.75	E180A
14.75	E180A
0	E180A
49	E180A
26.75	E180A
48	E180A
28.5	E180A
0	E180A
34.75	E180A
24.75	E180A
11.75	E180A
47.75	E180A
28	E180A
3	E180A
40.5	E180A
50.5	E180A
1.25	E180A
21	E180A
2	E180A
21.75	E180A
44.5	E180A
7.25	E180A
0	E180A
0	E180A
21.25	E180A
37.25	E180A
0	E180A
26.75	E180A
33.5	E180A
28.75	E180A
26	E180A
29.25	E180A
9.75	E180A
33.25	E180A
25.25	E180A
27.25	E180A
11.25	E180A
0	E180A
20	E180A
0.25	E180A
3.5	E180A
0.5	E180A
15.25	E180A
15.5	E180A
0	E180A
3.75	E180A
10.25	E180A
14.25	E180A
9	E180A
17.75	E180A
9	E180A
4.5	E180A
15.75	E180A
0	E180A
27.75	E180A
15.5	E180A
1.25	E180A
27.5	E180A
18.5	E180A
16.5	E180A
25.25	E180A
23.5	E180A
31.25	E180A
0	E180A
26.75	E180A
9.75	E180A
9	E180A
8.25	E180A
15.25	E180A
8.5	E180A
0.25	E180A
2.5	E180A
18.25	E180A
0	E180A
23.75	E180A
3.5	E180A
0	E180A
16.5	E180A
7.75	E180A
23.5	E180A
0	E180A
16.5	E180A
8	E180A
8.25	E180A
7.25	E180A
9.5	E180A
16.75	E180A
2.75	E180A
5.25	E180A
14.25	E180A
6.25	E180A
7.25	E180A
0.25	E180A
31	E180A
0.25	E180A
20.75	E180A
6.5	E180A
14	E180A
12.25	E180A
6.25	E180A
23.25	E180A
18.25	E180A
0.25	E180A
13	E180A
17	E180A
0	E180A
24	E180A
9	E180A
14.75	E180A
6.75	E180A
8.75	E180A
14.5	E180A
0	E180A
24.25	E180A
17.5	E180A
24	E180A
8.5	E180A
0	E180A
0	E180A
0	E180A
5.5	E180A
4.5	E180A
13.75	E180A
10.75	E180A
15.5	E180A
14	E180A
8	E180A
8.75	E180A
23.5	E180A
9.5	E180A
16.25	E180A
16.25	E180A
21.75	E180A
14.25	E180A
9.75	E180A
17.75	E180A
2.5	E180A
0	E180A
4.25	E180A
5.25	E180A
7.25	E180A
10	E180A
0	E180A
0	E180A
0	E180A
3.75	E180A
8.75	E180A
0	E180A
4.25	E180A
5.75	E180A
11	E180A
0	E180A
0	E180A
0	E180A
0	E180A
13.25	E180A
7	E180A
11.75	E180A
0	E180A
7.5	E180A
13.25	E180A
0.25	E180A
0.25	E180A
8	E180A
3.5	E180A
0	E180A
3	E180A
5.5	E180A
16.75	E180A
0	E180A
0.25	E180A
0	E180A
0	E180A
0	E180A
0	E180A
1.75	E180A
10.25	E180A
12	E180A
2.5	E180A
0	E180A
8.25	E180A
0	E180A
0	E180A
0	E180A
0	E180A
0	E180A
0	E180A
2.75	E180A
0	E180A
12.75	E180A
8.25	E180A
6	E180A
0	E180A
2.75	E180A
9.5	E180A
0	E180A
3.5	E180A
6.75	E180A
9	E180A
8.25	E180A
0	E180A
3.75	E180A
0	E180A
1.5	E180A
1.25	E180A
5.5	E180A
0	E180A
3	E180A
9	E180A
12.5	E180A
0	E180A
4.5	E180A
8	E180A
0	E180A
0	E180A
3.5	E180A
6	E180A
1.25	E180A
3.5	E180A
9	E180A
5.25	E180A
15.75	E180A
0	E180A
0	E180A
3.75	E180A
2.75	E180A
11.25	E180A
1.75	E180A
5	E180A
6	E180A
1.75	E180A
0	E180A
0	E180A
0	E180A
6	E180A
4.5	E180A
5.5	E180A
7	E180A
1.5	E180A
10.5	E180A
0	E180A
5.25	E180A
6.5	E180A
7.75	E180A
6	E180A
0.5	E180A
2.25	E180A
6.5	E180A
0	E180A
0	E180A
0	E180A
0	E180A
0	E180A
2.25	E180A
2	E180A
2.75	E180A
7.5	E180A
11	E180A
1	E180A
3.75	E180A
0	E180A
0	E180A
0	E180A
1.75	E180A
12.75	E180A
6.25	E180A
0.5	E180A
2	E180A
3	E180A
0	E180A
3	E180A
0	E180A
0	E180A
0	E180A
0	E180A
0	E180A
0.25	E180A
1	E180A
2	E180A
2.5	E180A
3.25	E180A
5.75	E180A
1	E180A
0	E180A
0	E180A
6.25	E180A
5	E180A
1	E180A
3	E180A
0	E180A
0	E180A
0	E180A
0	E180A
5.5	E180A
10	E180A
0	E180A
0	E180A
1.25	E180A
0.5	E180A
5.75	E180A
0	E180A
0	E180A
0	E180A
0	E180A
0	E180A
0	E180A
7	E180A
0	E180A
1.25	E180A
0	E180A
0	E180A
0	E180A
3	E180A
5	E180A
3.5	E180A
0.25	E180A
0	E180A
0	E180A
0	E180A
0	E180A
0	E180A
0	E180A
0.5	E180A
3.75	E180A
3	E180A
6.5	E180A
0.25	E180A
0	E180A
0	E180A
0	E180A
2.25	E180A
2	E180A
2.25	E180A
0	E180A
5.75	E180A
6.75	E180A
0	E180A
0	E180A
0	E180A
0	E180A
0.25	E180A
1.25	E180A
3.75	E180A
1	E180A
3.25	E180A
4.25	E180A
0	E180A
0	E180A
3.5	E180A
0	E180A
0	E180A
0	E180A
3.5	E180A
0.25	E180A
0.25	E180A
4.25	E180A
1.75	E180A
0	E180A
1.75	E180A
2.5	E180A
3.5	E180A
6	E180A
0	E180A
0.25	E180A
2	E180A
3	E180A
3.75	E180A
0.75	E180A
2.5	E180A
0.25	E180A
1.5	E180A
4.25	E180A
4.5	E180A
0	E180A
0	E180A
1.5	E180A
1.75	E180A
2.75	E180A
4	E180A
5.25	E180A
0.75	E180A
2	E180A
4.5	E180A
7.5	E180A
0	E180A
2.25	E180A
4	E180A
[truncated: 579 more rows]
