# Supplementary material for: Orai-mediated calcium entry determines activity of central dopaminergic neurons by regulation of gene expression
Source: eLife. 2024 Jan 30;12:RP88808. doi: 10.7554/eLife.88808 (PMC10945566; doi:10.7554/eLife.88808)
Supplement: Figure 1—source data 1. [file elife-88808-fig1-data1.xlsx]

## Sheet: Panel C
CS	THD'GAL4/+	E180A/+	MB296B/+	MB296BGAL4>E180A
900	187	509	900	0
104	87	268	900	44
214	105	381	900	0
238	214	396	900	12
733	238	674	900	15
676	733	731	900	26
737	676	374	900	50
900	737	353	900	74
172	900	184	900	82
235	172	227	900	0
492	235	540	900	3
501	492	345	731	59
735	501	357	702	63
900	735	374	638	76
277	900	520	616	81
303	277	900	610	144
408	303	100	603	73
415	408	169	600	112
395	415	267	579	241
572	395	283	568	108
540	572	294	552	0
575	540	471	532	0
584	575	782	525	0
596	584	641	518	11
65	596	900	509	35
95	65	900	490	23
113	95	247	473	32
150	113	234	464	56
174	150	258	461	66
204	174	351	455	21
526	204	471	446	58
655	526	611	443	120
900	655	900	437	141
900	900	900	427	179
289	900		419	5
303	289		409	67
404	303		406	77
510	404		396	241
900	510		391	421
203	900		391	65
293	203		375	86
327	293		375	54
438	327		365	97
442	438		361	137
495	442		361	217
900	495		358	80
810	900		350	125
650			349	197
900			342	184
609			337	244
759			327
			315
			313
			312
			309
			308
			302
			300
			290
			288
			288
			284
			273
			258
			257
			236
			236
			230
			214
			198

## Sheet: Panel D
CS	THD'GAL4/+	E180A/+	THD'GAL4>E180A	18C	29C	0-24	24-48	48-72	72-96	0-2 days PE	5-7 days PE
900	87	509	0	125	0	674	268	70	0	0	139
104	105	268	0	234	0	731	284	31	0	0	153
214	214	381	0	248	0	74	432	246	0	0	191
238	238	396	0	312	0	153	418	60	0	0	228
733	733	674	0	479	0	184	439	286	0	0	239
676	676	731	0	491	0	227	147	354	0	0	266
737	737	374	0	648	0	240	217	381	0	0	273
900	900	353	0	818	0	345	251	449	0	0	286
172	172	184	0	900	0	357	273	20	0	0	299
235	235	227	0	259	0	374	286	170	0	0	311
492	492	540	0	507	0	520	299	0	0	0	322
501	501	345	0	541	0	900	311	0	0	0	343
735	735	357	0	900	0	168	322	136	0	0	363
900	900	374	0	900	0	217	343	59	0	0	371
277	277	520	0	137	0	296	425	72	0	0	371
303	303	900	0	157	0	425	443	46	0	0	383
408	408	100	0	196	0	443	569	114	0	0	491
415	415	169	0	270	0	569	571	125	0	0	613
395	395	267	0	375	0	571	594	136	0	0	900
572	572	283	0	412	0	594	813	75	0	0	900
540	540	294	0	509	0	813	383	44			900
575	575	471	0	520	0	866	491	23			814
584	584	782	0	574	0	890	613				768
596	596	641	0	567	0						246
65	65	900	0	644	0						900
95	95	900	0	780	0						246
113	113	247	0	731	0						258
150	150	234	0	900	0						156
174	174	258	0	245	0						523
204	204	351	0	900	0						105
526	526	471	0	526	0
655	655	611	0	655	0
900	900	900	0	900	0
900	900	900		900
289	289			289
303	303			303
404	404			404
510	510			510
900	900			900
203	203			203
293	293			293
327	327			327
438	438			438
442	442			442
495	495			495
900	900			900
810
650
900
609
759

## Sheet: Panel E
No	CT	Cat	log10CT
1	0.785385	Neg	-0.104918
2	1.41441	Neg	0.150577
3	1.00533	Neg	0.00230926
4	0.992546	Neg	-0.00324951
5	107.764	Pos	2.03248
6	109.07	Pos	2.0377
7	105.798	Pos	2.02448

## Sheet: Panel F
Symbol	GeneID	logFC	logCPM	F	PValue	log10P	FDR
CG11703	NM_142535	9.0169	2.8171	13.3045	0.000265114	3.57657	1
CG42364	NM_001144260	8.41234	2.24824	8.17668	0.00424407	2.37222	1
lncRNA:CR45180	NR_125320	8.40801	2.24628	8.16128	0.00428027	2.36853	1
CG9166	NM_138261	8.27491	2.12066	7.3558	0.00668579	2.17485	1
asRNA:CR45028	NR_125206	8.15056	2.00836	6.6697	0.00980791	2.00842	1
DptA	NM_057460	8.13723	1.99342	6.58676	0.0102754	1.9882	1
Drsl6	NM_168028	8.09066	1.95033	6.35537	0.0117041	1.93166	1
cnc	NM_001260331	7.90006	1.77661	5.51486	0.0188574	1.72452	1
Tsp42En	NM_001273829	7.87848	1.75684	5.43097	0.0197846	1.70367	1
CG9861	NM_137934	7.84226	1.7238	5.29342	0.0214082	1.66942	1
CG6216	NM_206320	7.83257	1.71834	5.26828	0.0217195	1.66315	1
CG42391	NM_001144199	7.80692	1.69591	5.17648	0.0228967	1.64023	1
lncRNA:CR44565	NR_124969	7.74921	1.64104	4.96556	0.0258591	1.58739	1
Blimp-1	NM_001300016	7.73897	1.63742	4.94791	0.0261243	1.58296	1
Dic1	NM_001300384	7.66553	1.56704	4.71302	0.0299373	1.52379	1
CG13003	NM_001169308	7.64548	1.54823	4.65297	0.0310021	1.50861	1
CG31933	NM_164441	7.61937	1.52468	4.57793	0.0323887	1.48961	1
lncRNA:CR45573	NR_125307	7.59848	1.50727	4.52197	0.0334646	1.47541	1
CG12075	NM_001272431	7.54276	1.45671	4.3711	0.0365559	1.43704	1
snoRNA:Psi28S-1192c	NR_003737	7.54276	1.45671	4.3711	0.0365559	1.43704	1
CG4788	NM_135655	7.52655	1.44347	4.33214	0.0374016	1.42711	1
CoRest	NM_001258826	7.51909	1.43771	4.315	0.0377802	1.42274	1
scaRNA:PsiU5-44	NR_048113	7.49333	1.41398	4.24818	0.0392948	1.40566	1
Ssl2	NM_143399	7.48707	1.40929	4.23431	0.0396171	1.40212	1
CG13857	NM_142778	7.45687	1.38177	4.15774	0.0414472	1.3825	1
CG44329	NM_001297981	7.42488	1.35407	4.08072	0.0433778	1.36273	1
Odc2	NM_057705	7.38982	1.33035	4.01081	0.0452121	1.34475	1
Actn	NM_001201604	7.373	1.31711	3.97397	0.0462113	1.33525	1
PK1-R	NM_001260160	7.36441	1.30409	3.94647	0.0469725	1.32816	1
CG13884	NM_138191	7.34204	1.29012	3.90907	0.0480289	1.3185	1
CG7631	NM_135916	7.32524	1.26683	3.85967	0.0494627	1.30572	1
Drsl1	NM_168027	7.32524	1.26683	3.85967	0.0494627	1.30572	1
Col4a1	NM_164616	7.27573	1.22487	3.76028	0.0524866	1.27995	1
GstD6	NM_080176	7.24636	1.20415	3.70894	0.0541245	1.26661	1
CG33339	NM_206557	7.24479	1.19755	3.69729	0.0545035	1.26358	1
CG17298	NM_142708	7.23523	1.19237	3.68326	0.054964	1.25992	1
CG11634	NM_001299200	7.22274	1.18123	3.65793	0.0558058	1.25332	1
kcc	NM_001299866	7.21807	1.18016	3.65348	0.055955	1.25216	1
Nepl21	NM_143389	7.21734	1.17496	3.64467	0.0562517	1.24986	1
CG34238	NM_001104106	7.21695	1.1737	3.64243	0.0563276	1.24928	1
CG14891	NM_142303	7.19962	1.1623	3.61406	0.0572958	1.24188	1
CG31244	NM_169857	7.19786	1.16646	3.6197	0.057102	1.24335	1
loqs	NM_001038814	7.18683	1.14996	3.58699	0.0582364	1.23481	1
Ir100a	NM_143641	7.17825	1.14102	3.56891	0.0588739	1.23008	1
CG43051	NM_001382204	7.15616	1.12594	3.53514	0.0600842	1.22124	1
CG1468	NM_132357	7.15477	1.12086	3.52726	0.0603703	1.21918	1
lncRNA:CR46011	NR_133378	7.13003	1.0997	3.48382	0.0619745	1.20779	1
lncRNA:CR44633	NR_124644	7.09985	1.07416	3.4381	0.0637117	1.19578	1
asRNA:CR44793	NR_124091	7.09438	1.06974	3.4304	0.0640094	1.19376	1
lncRNA:CR44923	NR_125068	7.09399	1.07264	3.43322	0.0639002	1.1945	1
CG6907	NM_135088	7.06902	1.04817	3.39365	0.0654506	1.18409	1
slgA	NM_167754	7.06672	1.0519	3.39629	0.0653462	1.18478	1
CG14194	NM_133132	7.06075	1.04932	3.39027	0.0655849	1.1832	1
CG34207	NM_001103940	7.05891	1.05007	3.39004	0.0655942	1.18313	1
HP1D3csd	NM_133130	7.05359	1.03575	3.37209	0.0663126	1.1784	1
lncRNA:CR45435	NR_124987	7.0484	1.03159	3.36486	0.066604	1.1765	1
CG12426	NM_143334	7.0484	1.03159	3.36486	0.066604	1.1765	1
CG3690	NM_001297835	7.03752	1.0217	3.34848	0.0672698	1.17218	1
lncRNA:CR32657	NR_002108	7.03752	1.0217	3.34848	0.0672698	1.17218	1
Cyp313a2	NM_141912	7.03752	1.0217	3.34848	0.0672698	1.17218	1
CG14551	NM_143205	7.03752	1.0217	3.34848	0.0672698	1.17218	1
Ir60b	NM_001144283	7.0227	1.01221	3.33041	0.068013	1.16741	1
	NM_001382085	7.02175	1.01145	3.32909	0.0680674	1.16706	1
Tbc1d15-17	NM_001272878	7.0058	0.99634	3.30453	0.0690922	1.16057	1
lncRNA:CR44667	NR_124671	7.00531	0.994731	3.30257	0.0691743	1.16006	1
CG13051	NM_001104148	7.00531	0.994731	3.30257	0.0691743	1.16006	1
Myo10A	NM_001272506	7.00044	0.992077	3.29714	0.0694036	1.15862	1
Jon99Ciii	NM_001300669	6.99458	0.986174	3.28776	0.069801	1.15614	1
lncRNA:CR45759	NR_124821	6.99059	0.993841	3.29363	0.0695521	1.15769	1
CG8249	NM_001259421	6.98595	0.986647	3.28357	0.0699795	1.15503	1
Sarm	NM_001104074	6.97554	0.975991	3.26682	0.0706975	1.1506	1
CG32655	NM_167320	6.97268	0.978672	3.26803	0.0706453	1.15092	1
ena	NM_001144237	6.97237	0.967254	3.25684	0.071129	1.14795	1
lncRNA:CR44638	NR_124650	6.97237	0.967254	3.25684	0.071129	1.14795	1
Andorra	NM_133044	6.97073	0.977128	3.26536	0.0707606	1.15021	1
Pi3K92E	NM_001275841	6.96056	0.962947	3.24638	0.0715842	1.14518	1
snoRNA:Psi28S-3385a	NR_003881	6.95033	0.949786	3.22842	0.0723735	1.14042	1
CG31454	NM_169224	6.9466	0.957082	3.23333	0.0721569	1.14172	1
AnxB9	NM_001275867	6.93867	0.939245	3.21217	0.0730955	1.13611	1
CG33137	NM_176163	6.92848	0.933885	3.20164	0.0735675	1.13331	1
Blos4	NM_140157	6.91982	0.928403	3.19182	0.0740106	1.13071	1
CG14326	NM_142382	6.91208	0.920979	3.18065	0.0745179	1.12774	1
CG42235	NM_170250	6.9091	0.922678	3.18068	0.0745166	1.12775	1
CG31882	NM_164865	6.90469	0.912491	3.16867	0.0750664	1.12455	1
CG34040	NM_001038874	6.90415	0.910683	3.16667	0.0751585	1.12402	1
qvr	NM_001144174	6.89874	0.917342	3.17012	0.0749998	1.12494	1
CG15643	NM_176736	6.89452	0.90996	3.16088	0.0754255	1.12248	1
Vha100-4	NM_142463	6.88686	0.897111	3.14463	0.0761804	1.11816	1
Ugt37A3	NM_141972	6.8853	0.895877	3.14263	0.0762736	1.11763	1
Sgs5bis	NM_169764	6.87259	0.885933	3.12649	0.0770324	1.11333	1
FASN1	NM_001144306	6.8724	0.895626	3.1356	0.076603	1.11575	1
Boot	NM_176109	6.8559	0.882903	3.11486	0.0775843	1.11023	1
CG31807	NM_001299054	6.84511	0.863079	3.09037	0.0787598	1.1037	1
CG8925	NM_142269	6.80337	0.830716	3.03794	0.0813423	1.08968	1
Ddc	NM_078876	6.79983	0.83718	3.04226	0.0811257	1.09084	1
Inx6	NM_132146	6.79159	0.821656	3.02325	0.0820816	1.08575	1
CG14851	NM_142115	6.78448	0.819283	3.01734	0.0823813	1.08417	1
CG14443	NM_132102	6.78171	0.820333	3.01693	0.0824024	1.08406	1
lncRNA:CR44738	NR_124373	6.78103	0.821469	3.01766	0.0823652	1.08426	1
lncRNA:CR45018	NR_123892	6.76437	0.800774	2.9897	0.0837988	1.07676	1
lncRNA:CR44723	NR_124885	6.76416	0.797417	2.98656	0.0839616	1.07592	1
HP6	NM_134998	6.75721	0.790437	2.9767	0.0844742	1.07328	1
CG6218	NM_142191	6.7395	0.781841	2.95993	0.0853544	1.06877	1
	NM_001382133	6.73554	0.780465	2.95669	0.0855261	1.0679	1
Sply	NM_143775	6.73291	0.775219	2.9506	0.0858485	1.06627	1
Lamtor5	NM_001272215	6.71802	0.758747	2.92815	0.08705	1.06023	1
RhoGAP18B	NM_001298497	6.71802	0.758747	2.92815	0.08705	1.06023	1
snoRNA:Me28S-A2634b	NR_003850	6.71608	0.769253	2.93672	0.0865895	1.06253	1
kappaB-Ras	NM_136434	6.70229	0.751944	2.91409	0.0878119	1.05645	1
CG32235	NM_168105	6.67773	0.726346	2.87856	0.0897694	1.04687	1
sals	NM_169391	6.67773	0.726346	2.87856	0.0897694	1.04687	1
CG14422	NM_130687	6.67349	0.735653	2.88493	0.0894149	1.04859	1
lncRNA:CR44285	NR_124487	6.65898	0.715817	2.85968	0.0908286	1.04178	1
CG32523	NM_167738	6.64527	0.703684	2.84186	0.091841	1.03696	1
Tlk	NM_001103403	6.63628	0.693204	2.82788	0.0926437	1.03318	1
CG12177	NM_132683	6.61628	0.682082	2.80794	0.093802	1.02779	1
CG9095	NM_001103514	6.59362	0.659285	2.77607	0.0956854	1.01915	1
lncRNA:CR44581	NR_124184	6.59362	0.659285	2.77607	0.0956854	1.01915	1
CG13159	NM_136924	6.59362	0.659285	2.77607	0.0956854	1.01915	1
CG43392	NM_001259949	6.59362	0.659285	2.77607	0.0956854	1.01915	1
fd96Ca	NM_001300587	6.59263	0.672202	2.78743	0.0950098	1.02223	1
osp	NM_001169504	6.58277	0.65319	2.76525	0.0963346	1.01622	1
dpr10	NM_168399	6.57668	0.65876	2.76742	0.0962039	1.01681	1
CG12054	NM_170545	6.56378	0.649235	2.7525	0.0971054	1.01276	1
CG14613	NM_134619	6.56052	0.636723	2.73947	0.0979005	1.00922	1
CG5756	NM_137448	6.55857	0.637398	2.73915	0.0979197	1.00913	1
CG34408	NM_001298146	6.55846	0.635254	2.73713	0.0980435	1.00858	1
CG31627	NM_165357	6.55241	2.73494	9.30868	0.00228129	2.64182	1
lncRNA:CR46231	NR_133216	6.54965	0.624553	2.72359	0.0988786	1.0049	1
lncRNA:CR43977	NR_073968	6.54965	0.624553	2.72359	0.0988786	1.0049	1
lncRNA:CR43650	NR_073882	6.52754	0.608241	2.69882	0.100425	0.998156	1
asRNA:CR44896	NR_123773	6.52547	0.615177	2.70391	0.100106	0.999541	1
CG13654	NM_143093	6.52439	0.61859	2.70638	0.0999508	1.00021	1
Pkn	NM_176114	6.52172	0.616641	2.70341	0.100137	0.999407	1
Nup98-96	NM_001260337	6.52039	0.615665	2.70193	0.10023	0.999003	1
mrt	NM_001260399	6.5043	0.588966	2.67097	0.102197	0.990564	1
CG9132	NM_206768	6.49482	0.58424	2.66238	0.10275	0.988218	1
	NM_001370038	6.48184	0.585791	2.65766	0.103055	0.98693	1
Or82a	NM_164323	6.48101	0.58299	2.65482	0.10324	0.986154	1
snoRNA:Psi28S-3436a	NR_002464	6.46923	0.567893	2.63785	0.104348	0.981518	1
Tango9	NM_001316533	6.46607	0.561067	2.63276	0.104683	0.980124	1
MsrA	NM_206371	6.46317	0.568077	2.63513	0.104527	0.980773	1
CG33303	NM_001273406	6.46119	0.566571	2.63341	0.10464	0.980304	1
shot	NM_001259382	6.45914	0.558366	2.62809	0.104991	0.978849	1
Ccs	NM_143772	6.45747	0.552483	2.62417	0.10525	0.977776	1
kst	NM_206266	6.45747	0.552483	2.62417	0.10525	0.977776	1
wbl	NM_001299680	6.45551	0.553383	2.62375	0.105279	0.977659	1
unc79	NM_001170182	6.45415	0.563882	2.62872	0.10495	0.979019	1
CG17477	NM_142341	6.44785	0.559335	2.62338	0.105303	0.977558	1
Pngl	NM_165454	6.43238	0.543778	2.60788	0.106337	0.973316	1
app	NM_001300114	6.41382	0.523339	2.58823	0.107663	0.967932	1
Diap1	NM_001274987	6.41233	0.531855	2.59219	0.107395	0.969017	1
Btk29A	NM_001273314	6.40906	0.515057	2.58151	0.108122	0.966087	1
lncRNA:CR45118	NR_124741	6.40906	0.515057	2.58151	0.108122	0.966087	1
asRNA:CR45814	NR_133152	6.40906	0.515057	2.58151	0.108122	0.966087	1
Zip99C	NM_170440	6.40906	0.515057	2.58151	0.108122	0.966087	1
lncRNA:CR46259	NR_133062	6.40873	0.529278	2.58914	0.107602	0.968179	1
vis	NM_176157	6.40657	0.52773	2.5873	0.107727	0.967676	1
CG13998	NM_144294	6.40649	0.518106	2.582	0.108088	0.966223	1
CG46301	NM_001347778	6.39869	0.514914	2.57667	0.108452	0.964761	1
Cyp6a8	NM_079025	6.39716	0.521007	2.57931	0.108272	0.965485	1
asRNA:CR45713	NR_124411	6.39285	0.503419	2.56765	0.109072	0.962285	1
drm	NM_080527	6.38248	0.495973	2.55878	0.109686	0.959847	1
lncRNA:CR44017	NR_073986	6.37897	0.495968	2.55718	0.109798	0.959407	1
CG30043	NM_165889	6.37005	0.49224	2.55103	0.110225	0.957719	1
CG34384	NM_001260042	6.3663	0.496996	2.55198	0.11016	0.957978	1
gw	NM_166780	6.36482	0.495943	2.55071	0.110247	0.957631	1
tyf	NM_001169188	6.35896	0.476639	2.53724	0.111192	0.953927	1
rtv	NM_001272514	6.35896	0.476639	2.53724	0.111192	0.953927	1
lncRNA:CR45461	NR_124229	6.35896	0.476639	2.53724	0.111192	0.953927	1
CG2201	NM_001299196	6.35896	0.476639	2.53724	0.111192	0.953927	1
lncRNA:CR45587	NR_125152	6.35896	0.476639	2.53724	0.111192	0.953927	1
CG8128	NM_001298353	6.35588	0.489611	2.54312	0.110779	0.955544	1
lncRNA:CR45005	NR_124016	6.35588	0.489611	2.54312	0.110779	0.955544	1
lncRNA:CR45353	NR_124284	6.35588	0.489611	2.54312	0.110779	0.955544	1
Tlk	NM_206620	6.35541	0.476679	2.53565	0.111304	0.953489	1
AOX2	NM_169665	6.34504	0.474607	2.52978	0.111719	0.951874	1
lncRNA:CR44620	NR_123896	6.33469	0.462067	2.51807	0.112552	0.948649	1
CG30485	NM_166013	6.3264	0.46666	2.51686	0.112638	0.948317	1
X11Lbeta	NM_001298156	6.31799	0.460746	2.50982	0.113142	0.946377	1
obst-A	NM_134534	6.31764	0.450073	2.50388	0.11357	0.944738	1
CG9674	NM_001300159	6.31492	0.45859	2.50728	0.113325	0.945675	1
Z600	NM_079359	6.30806	0.440622	2.4944	0.114255	0.942125	1
	NM_001382172	6.30707	0.437174	2.49206	0.114425	0.941481	1
lncRNA:CR44985	NR_124085	6.30707	0.437174	2.49206	0.114425	0.941481	1
sqa	NM_001273903	6.30707	0.437174	2.49206	0.114425	0.941481	1
CG11726	NM_140204	6.30707	0.437174	2.49206	0.114425	0.941481	1
lncRNA:CR44549	NR_124892	6.30707	0.437174	2.49206	0.114425	0.941481	1
CG8677	NM_001299194	6.29762	0.430517	2.48416	0.115001	0.939299	1
CG34165	NM_001299011	6.29472	0.431224	2.48325	0.115067	0.939049	1
snoRNA:Me18S-U1356c	NR_003876	6.29394	0.43067	2.4826	0.115115	0.938868	1
rl	NM_001015121	6.28692	0.436756	2.48281	0.115099	0.938927	1
RIC-3	NM_001103921	6.28614	0.436209	2.48216	0.115147	0.938747	1
CG13492	NM_166487	6.28092	0.418806	2.4702	0.116027	0.935443	1
tws	NM_057532	6.27907	0.431276	2.47629	0.115578	0.937125	1
CG17684	NM_001276228	6.27749	0.430178	2.47498	0.115674	0.936763	1
f	NM_001201729	6.26959	0.424677	2.46841	0.116158	0.934949	1
Cyt-c-p	NM_057828	6.26383	0.41248	2.45905	0.116852	0.932363	1
lncRNA:CR44773	NR_124112	6.25325	0.396605	2.44543	0.117871	0.928594	1
und	NM_058025	6.25325	0.396605	2.44543	0.117871	0.928594	1
ND-ACP	NM_057654	6.25325	0.396605	2.44543	0.117871	0.928594	1
CAH5	NM_001104518	6.25325	0.396605	2.44543	0.117871	0.928594	1
GstE4	NM_137482	6.24531	0.394016	2.44045	0.118245	0.927216	1
CG3168	NM_001298028	6.23988	0.401733	2.44241	0.118098	0.927758	1
lncRNA:CR43942	NR_073976	6.23965	0.390037	2.43569	0.118605	0.925897	1
Pka-C1	NM_057629	6.23854	0.395079	2.43806	0.118426	0.926553	1
CG3330	NM_143301	6.23409	0.389168	2.43274	0.118828	0.925081	1
asRNA:CR43257	NR_048202	6.23176	0.39613	2.43566	0.118607	0.92589	1
CG9254	NM_135820	6.20291	0.373832	2.41027	0.120545	0.918852	1
CG4598	NM_001273375	6.19734	0.354867	2.39687	0.121581	0.915134	1
brp	NM_001043070	6.19734	0.354867	2.39687	0.121581	0.915134	1
CG43175	NM_001300449	6.19734	0.354867	2.39687	0.121581	0.915134	1
asRNA:CR45712	NR_124024	6.18799	0.348443	2.38905	0.122191	0.91296	1
CG11318	NM_143585	6.18715	0.347857	2.38834	0.122247	0.912763	1
Hsp60B	NM_080186	6.18622	0.362402	2.39639	0.121619	0.914999	1
CG17666	NM_140342	6.18575	0.349992	2.38897	0.122197	0.91294	1
omd	NM_142046	6.18033	0.358384	2.39149	0.122	0.91364	1
Jon66Cii	NM_139960	6.17859	0.341995	2.38117	0.122808	0.910773	1
CG43880	NM_001274625	6.1778	0.356659	2.38939	0.122164	0.913055	1
CG11912	NM_134673	6.17142	0.343387	2.37887	0.122989	0.910132	1
CG33170	NM_001144528	6.15561	0.32947	2.36382	0.12418	0.905947	1
Jon66Ci	NM_168271	6.15001	0.322512	2.35728	0.124703	0.904124	1
	NM_001382154	6.15001	0.322512	2.35728	0.124703	0.904124	1
yellow-h	NM_143655	6.14373	0.324611	2.35581	0.12482	0.903715	1
pyd	NM_001104242	6.14351	0.330785	2.35937	0.124536	0.904707	1
CysRS-m	NM_001299476	6.13918	0.311892	2.34627	0.125586	0.901059	1
CG5504	NM_001299848	6.13918	0.311892	2.34627	0.125586	0.901059	1
CG13059	NM_140617	6.13918	0.311892	2.34627	0.125586	0.901059	1
CG10417	NM_136325	6.13918	0.327857	2.35577	0.124823	0.903705	1
CG42797	NM_001272456	6.13397	0.324337	2.35144	0.12517	0.902499	1
CG42825	NM_168396	6.13049	0.321986	2.34855	0.125403	0.901693	1
CG13023	NM_001300161	6.12962	0.321398	2.34782	0.125461	0.901491	1
CG31207	NM_169943	6.12946	0.305293	2.33813	0.126244	0.89879	1
Sxl	NM_167116	6.11382	0.298002	2.32703	0.127147	0.895694	1
snoRNA:Psi18S-1820	NR_001911	6.11382	0.298002	2.32703	0.127147	0.895694	1
Rab19	NM_001274646	6.10981	0.292022	2.32168	0.127585	0.8942	1
Toll-9	NM_140957	6.10483	0.302017	2.32561	0.127264	0.895296	1
glob3	NM_141340	6.10128	0.299631	2.32265	0.127506	0.894471	1
CG43055	NM_001258938	6.10039	0.299034	2.32191	0.127566	0.894265	1
CG10433	NM_166463	6.10039	0.299034	2.32191	0.127566	0.894265	1
CG6650	NM_140428	6.09989	0.28535	2.31334	0.128272	0.89187	1
Patronin	NM_001274127	6.09874	0.297827	2.32048	0.127683	0.893865	1
UQCR-C2	NM_140648	6.09771	0.297242	2.31969	0.127748	0.893644	1
CG43078	NM_168279	6.08337	0.287652	2.30772	0.128736	0.890301	1
lncRNA:CR46127	NR_133360	6.08157	0.28645	2.30622	0.12886	0.88988	1
lncRNA:CR43960	NR_073652	6.07977	0.285247	2.30471	0.128986	0.889459	1
wnd	NM_001202203	6.07977	0.285247	2.30471	0.128986	0.889459	1
lncRNA:TS9	NR_156781	6.07859	0.267605	2.29327	0.129939	0.88626	1
snoRNA:Me28S-A982a	NR_003788	6.07441	0.268247	2.29189	0.130054	0.885876	1
lncRNA:CR45052	NR_125311	6.05824	0.254013	2.27615	0.131381	0.881468	1
CG5062	NM_131979	6.05225	0.264103	2.27995	0.131059	0.882532	1
Ance-2	NM_176028	6.05055	0.262865	2.27846	0.131185	0.882114	1
CG6299	NM_001298340	6.05041	0.262881	2.27841	0.13119	0.882101	1
CG32302	NM_167944	6.04796	0.247179	2.26751	0.132115	0.879048	1
CG8584	NM_136560	6.0458	0.259824	2.27455	0.131516	0.881021	1
sisRNA:4	NR_163207	6.04395	0.2586	2.27301	0.131647	0.880588	1
lncRNA:CR43644	NR_074062	6.04395	0.2586	2.27301	0.131647	0.880588	1
CG12693	NM_131933	6.04302	0.257987	2.27223	0.131713	0.880372	1
CG12716	NM_132617	6.03931	0.255535	2.26914	0.131976	0.879504	1
lncRNA:CR44409	NR_124330	6.03187	0.250621	2.26293	0.132507	0.877762	1
Lnk	NM_170247	6.02907	0.248774	2.26059	0.132707	0.877107	1
CD98hc	NM_001275427	6.01668	0.226522	2.24129	0.134372	0.871693	1
CG16898	NM_137608	6.01534	0.221923	2.23779	0.134676	0.87071	1
lncRNA:CR46024	NR_133399	6.01534	0.221923	2.23779	0.134676	0.87071	1
CG11854	NM_143101	5.99959	0.226411	2.23411	0.134997	0.869675	1
asRNA:CR46136	NR_133328	5.99783	0.22514	2.23257	0.135132	0.869241	1
CG6974	NM_142157	5.99577	0.223908	2.23092	0.135276	0.86878	1
CG4009	NM_001275726	5.99409	0.20794	2.21997	0.136239	0.865698	1
lncRNA:CR43801	NR_073731	5.98906	0.219521	2.22533	0.135766	0.867208	1
CG2225	NM_165393	5.98906	0.219521	2.22533	0.135766	0.867208	1
lncRNA:CR45181	NR_125324	5.98044	0.19898	2.20852	0.137253	0.862478	1
ImpE2	NM_057232	5.98039	0.213864	2.21811	0.136403	0.865177	1
Sarm	NM_001259733	5.98039	0.213864	2.21811	0.136403	0.865177	1
CG9737	NM_143526	5.97651	0.211344	2.21489	0.136688	0.864271	1
CG45066	NM_001259657	5.97457	0.210082	2.21328	0.13683	0.863817	1
snoRNA:Psi28S-1175c	NR_003829	5.96862	0.191269	2.19864	0.138136	0.859693	1
APC7	NM_132101	5.9492	0.174756	2.17986	0.13983	0.854398	1
Tim9a	NM_132653	5.9492	0.174756	2.17986	0.13983	0.854398	1
CG7720	NM_001170179	5.9492	0.174756	2.17986	0.13983	0.854398	1
Mpc1	NM_001275791	5.9492	0.174756	2.17986	0.13983	0.854398	1
ver	NM_140330	5.94568	0.1764	2.1795	0.139863	0.854297	1
CG5327	NM_166297	5.94394	0.187056	2.18577	0.139295	0.856066	1
CG42561	NM_001169709	5.94295	0.186415	2.18494	0.139369	0.855833	1
Or98a	NM_079812	5.93997	0.184491	2.18247	0.139593	0.855135	1
CG42329	NM_134746	5.93957	0.172514	2.17445	0.140323	0.852871	1
LysS	NM_057481	5.93798	0.183207	2.18082	0.139743	0.854669	1
lncRNA:CR32773	NR_123791	5.929	0.177418	2.17336	0.140422	0.852565	1
CG6220	NM_137053	5.92842	0.165346	2.16518	0.141172	0.850253	1
CG2070	NM_001273857	5.92398	0.174194	2.1692	0.140802	0.851391	1
Ubc87F	NM_142052	5.92339	0.162067	2.16096	0.141559	0.849063	1
VhaSFD	NM_165177	5.92334	0.16999	2.16618	0.14108	0.850536	1
Clamp	NM_001014498	5.92298	0.173548	2.16837	0.140878	0.851156	1
CG6337	NM_001299466	5.91895	0.170964	2.16504	0.141184	0.850213	1
CG5078	NM_140981	5.91895	0.170964	2.16504	0.141184	0.850213	1
Irbp18	NM_001274769	5.9097	2.22354	5.47629	0.019278	1.71494	1
	NM_001382020	5.90787	0.160282	2.15349	0.142249	0.84695	1
CG2961	NM_001298153	5.90176	0.156364	2.14842	0.14272	0.845516	1
cv-c	NM_001104316	5.88606	0.146588	2.13559	0.143918	0.841885	1
CG14400	NM_136224	5.87989	0.126005	2.1193	0.145456	0.837267	1
CG45072	NM_001300671	5.87989	0.126005	2.1193	0.145456	0.837267	1
CG3294	NM_135013	5.87571	0.140003	2.12703	0.144724	0.839461	1
CG13748	NM_136586	5.87379	0.138653	2.12536	0.144882	0.838986	1
Efr	NM_132071	5.87259	0.138023	2.12446	0.144967	0.838731	1
SkpD	NM_134513	5.87155	0.137363	2.1236	0.145048	0.838487	1
gro	NM_170254	5.87155	0.137363	2.1236	0.145048	0.838487	1
RpS10b	NM_001258829	5.8705	0.136702	2.12274	0.14513	0.838243	1
lva	NM_080325	5.86842	0.13538	2.12102	0.145293	0.837755	1
lncRNA:CR43705	NR_073961	5.86842	0.13538	2.12102	0.145293	0.837755	1
Dro	NM_001259395	5.86827	0.118602	2.10939	0.146401	0.834456	1
CG16824	NM_001103688	5.86633	0.134057	2.11929	0.145457	0.837266	1
CG43796	NM_001273325	5.86528	0.133395	2.11843	0.145539	0.837022	1
nSyb	NM_001274340	5.86319	0.13207	2.1167	0.145703	0.836532	1
scaRNA:MeU2-48	NR_048216	5.86109	0.130745	2.11498	0.145867	0.836042	1
Arp10	NM_001298523	5.85812	0.116492	2.10381	0.146936	0.832872	1
mbl	NM_001274115	5.84155	0.101659	2.08639	0.14862	0.827923	1
lncRNA:CR46060	NR_133455	5.82575	0.104941	2.08255	0.148994	0.826832	1
Pgant2	NM_205903	5.82468	0.104266	2.08164	0.149083	0.826571	1
nemy	NM_001299430	5.82468	0.104266	2.08164	0.149083	0.826571	1
CG18449	NM_136530	5.82037	0.101565	2.07796	0.149443	0.825526	1
lncRNA:CR46095	NR_133444	5.81388	0.0975058	2.07244	0.149985	0.823953	1
14-3-3zeta	NM_001273917	5.81279	0.0968284	2.07151	0.150076	0.82369	1
Rdl	NM_168322	5.80874	0.081145	2.05838	0.151374	0.819948	1
ITP	NM_001169823	5.80845	0.0941161	2.06782	0.15044	0.822638	1
bves	NM_001272823	5.80709	0.0755604	2.0536	0.15185	0.818586	1
Gr22a	NM_164440	5.80709	0.0755604	2.0536	0.15185	0.818586	1
CG33798	NM_001032243	5.80709	0.0755604	2.0536	0.15185	0.818586	1
par-1	NM_001169740	5.80709	0.0755604	2.0536	0.15185	0.818586	1
Gabat	NM_001170008	5.80709	0.0755604	2.0536	0.15185	0.818586	1
lncRNA:CR45945	NR_133288	5.80709	0.0755604	2.0536	0.15185	0.818586	1
CG18368	NM_137052	5.80409	0.0913998	2.06412	0.150805	0.821583	1
RpS23	NM_137095	5.80181	2.02828	4.6341	0.0313448	1.50383	1
Cka	NM_164780	5.80082	0.0893599	2.06133	0.151081	0.82079	1
Hers	NM_001258842	5.76281	0.0620452	2.02636	0.154594	0.810808	1
Nep3	NM_078693	5.76281	0.0620452	2.02636	0.154594	0.810808	1
lncRNA:CR45127	NR_124443	5.76281	0.0620452	2.02636	0.154594	0.810808	1
CG43935	NM_001276075	5.76281	0.0620452	2.02636	0.154594	0.810808	1
CycT	NM_206395	5.75719	0.0585778	2.02161	0.155078	0.80945	1
CG31954	NM_164543	5.75532	0.0434185	2.01291	0.155969	0.806962	1
CG3517	NM_142550	5.75493	0.057189	2.0197	0.155273	0.808905	1
mth	NM_001259606	5.7538	0.0564942	2.01875	0.15537	0.808633	1
lncRNA:CR44529	NR_124779	5.75305	0.042001	2.01152	0.156112	0.806564	1
fog	NM_001272855	5.75267	0.0557992	2.0178	0.155468	0.80836	1
Rpn12R	NM_206364	5.74928	0.0537124	2.01493	0.155761	0.807541	1
Oatp58Da	NM_137813	5.74815	0.0530163	2.01398	0.155859	0.807268	1
alt	NM_001275749	5.74247	0.0495319	2.0102	0.156248	0.806187	1
SkpE	NM_134515	5.73791	0.0467395	2.00743	0.156533	0.805394	1
Sarm	NM_001104071	5.73791	0.0467395	2.00743	0.156533	0.805394	1
CG34245	NM_001202178	5.73791	0.0467395	2.00743	0.156533	0.805394	1
CAH7	NM_001300339	5.73791	0.0467395	2.00743	0.156533	0.805394	1
asRNA:CR43474	NR_048467	5.73791	0.0467395	2.00743	0.156533	0.805394	1
	NM_001382143	5.73039	0.0233009	1.99588	0.15773	0.802085	1
CG5773	NM_001299629	5.73039	0.0233009	1.99588	0.15773	0.802085	1
lncRNA:CR45325	NR_124716	5.73039	0.0233009	1.99588	0.15773	0.802085	1
CG11382	NM_130539	5.71118	0.0164355	1.98595	0.158767	0.799238	1
CG10793	NM_130698	5.69702	0.0178219	1.98108	0.15928	0.79784	1
CG10962	NM_176714	5.69702	0.0178219	1.98108	0.15928	0.79784	1
mthl10	NM_138186	5.69702	0.0178219	1.98108	0.15928	0.79784	1
CG5509	NM_141947	5.69702	0.0178219	1.98108	0.15928	0.79784	1
Gpo1	NM_001103862	5.69114	0.0142579	1.9775	0.159657	0.796811	1
CG46281	NM_001104295	5.69114	0.0142579	1.9775	0.159657	0.796811	1
Myd88	NM_001273892	5.68782	-0.00262936	1.96979	0.160473	0.794599	1
lncRNA:CR45567	NR_125287	5.68405	0.00997201	1.97318	0.160114	0.795572	1
klar	NM_001274284	5.68287	0.00925673	1.97246	0.16019	0.795364	1
Dscam1	NM_001043040	5.68168	0.00854118	1.97174	0.160267	0.795157	1
CG10512	NM_141032	5.6805	0.00782535	1.97101	0.160343	0.794949	1
CecA2	NM_079850	5.67931	0.00710925	1.97029	0.16042	0.794742	1
FeCH	NM_170580	5.67814	-0.00842283	1.96388	0.161102	0.792899	1
kirre	NM_166958	5.67812	0.00639287	1.96957	0.160497	0.794534	1
CG5367	NM_135543	5.67693	0.00567621	1.96884	0.160574	0.794325	1
asRNA:CR45129	NR_124449	5.67217	0.00280682	1.96594	0.160882	0.793491	1
CG33773	NM_001032042	5.67217	0.00280682	1.96594	0.160882	0.793491	1
esn	NM_080251	5.66479	-0.0164364	1.95571	0.161976	0.790549	1
CG32053	NM_168394	5.66285	-0.00761785	1.9584	0.161687	0.791324	1
CG13366	NM_001297820	5.65526	-0.0118704	1.95389	0.162171	0.790026	1
Zasp52	NM_001274079	5.65131	-0.0244834	1.94746	0.162864	0.788176	1
Tim8	NM_001298191	5.64934	-0.0309079	1.94418	0.163218	0.787231	1
CG33523	NM_001259713	5.64934	-0.0309079	1.94418	0.163218	0.787231	1
Cp16	NM_079257	5.64934	-0.0309079	1.94418	0.163218	0.787231	1
smp-30	NM_001275652	5.64934	-0.0309079	1.94418	0.163218	0.787231	1
Qsox4	NM_170084	5.64934	-0.0309079	1.94418	0.163218	0.787231	1
CG5506	NM_140764	5.64818	-0.0162861	1.94949	0.162644	0.788761	1
eIF4E4	NM_139795	5.62809	-0.0278143	1.93741	0.163953	0.78528	1
lncRNA:CR42755	NR_124889	5.62809	-0.0278143	1.93741	0.163953	0.78528	1
CG10657	NM_140322	5.62809	-0.0278143	1.93741	0.163953	0.78528	1
CG13046	NM_140606	5.62809	-0.0278143	1.93741	0.163953	0.78528	1
Or74a	NM_079399	5.62809	-0.0278143	1.93741	0.163953	0.78528	1
lncRNA:CR45964	NR_133306	5.62809	-0.0278143	1.93741	0.163953	0.78528	1
Gr93a	NM_079718	5.62809	-0.0278143	1.93741	0.163953	0.78528	1
lncRNA:CR43643	NR_074061	5.62809	-0.0278143	1.93741	0.163953	0.78528	1
lncRNA:CR44302	NR_124510	5.62439	-0.0300131	1.93515	0.164199	0.78463	1
PAN3	NM_167983	5.62439	-0.0300131	1.93515	0.164199	0.78463	1
dan	NM_001276020	5.62439	-0.0300131	1.93515	0.164199	0.78463	1
CG6664	NM_168709	5.62192	-0.0314805	1.93364	0.164363	0.784195	1
lncRNA:CR43656	NR_073669	5.62069	-0.0322146	1.93289	0.164446	0.783978	1
sug	NM_001274003	5.61697	-0.0344186	1.93062	0.164693	0.783324	1
CG7179	NM_164771	5.61573	-0.0351539	1.92987	0.164776	0.783106	1
Pgant8	NM_140543	5.61573	-0.0351539	1.92987	0.164776	0.783106	1
asRNA:CR46033	NR_133254	5.61573	-0.0351539	1.92987	0.164776	0.783106	1
Tm2	NM_001275664	5.61573	-0.0351539	1.92987	0.164776	0.783106	1
CG7365	NM_140921	5.61449	-0.0358894	1.92911	0.164859	0.782887	1
Madm	NM_001316491	5.61449	-0.0358894	1.92911	0.164859	0.782887	1
alpha-Est4	NM_079542	5.61325	-0.0366253	1.92835	0.164942	0.782668	1
sba	NM_001104422	5.61201	-0.0373614	1.92759	0.165025	0.78245	1
CG5004	NM_001298430	5.61076	-0.0380978	1.92683	0.165109	0.782231	1
Nepl7	NM_135733	5.61016	-0.0488262	1.92223	0.165614	0.780904	1
CG10996	NM_132696	5.60952	-0.0388345	1.92607	0.165192	0.782011	1
CG18135	NM_176348	5.60952	-0.0388345	1.92607	0.165192	0.782011	1
CG11585	NM_132715	5.60827	-0.0395715	1.92531	0.165275	0.781792	1
Prp6	NM_001316442	5.60578	-0.0410464	1.92379	0.165443	0.781352	1
CG7231	NM_135323	5.60391	-0.0525675	1.91824	0.166054	0.779752	1
snoRNA:Psi18S-640d	NR_003772	5.60328	-0.0425224	1.92226	0.16561	0.780912	1
CG32040	NM_168326	5.60224	-0.0482308	1.91954	0.16591	0.780126	1
ics	NM_001298974	5.59408	-0.0636962	1.90962	0.167008	0.777261	1
eIF3a	NM_168999	5.5805	1.9268	4.04788	0.0442293	1.35429	1
CG42237	NM_001298256	5.56349	-0.0872161	1.88763	0.169473	0.7709	1
CG5613	NM_176750	5.56349	-0.0872161	1.88763	0.169473	0.7709	1
Kdm5	NM_001298720	5.56349	-0.0872161	1.88763	0.169473	0.7709	1
lncRNA:CR45913	NR_133083	5.56349	-0.0872161	1.88763	0.169473	0.7709	1
Uhg3	NR_033154	5.56349	-0.0872161	1.88763	0.169473	0.7709	1
ppk27	NM_139569	5.56349	-0.0872161	1.88763	0.169473	0.7709	1
CG3349	NM_140473	5.56349	-0.0872161	1.88763	0.169473	0.7709	1
Suv3	NM_001316529	5.56349	-0.0872161	1.88763	0.169473	0.7709	1
nAChRalpha4	NM_001316465	5.55792	-0.0848876	1.88663	0.169585	0.770612	1
snoRNA:Psi18S-1377d	NR_003916	5.55754	-0.0795432	1.88892	0.169327	0.771274	1
Npc1a	NM_001298868	5.55569	-0.0749573	1.89031	0.169169	0.771678	1
CG18636	NM_205992	5.55569	-0.0749573	1.89031	0.169169	0.771678	1
h-cup	NM_142205	5.55569	-0.0749573	1.89031	0.169169	0.771678	1
lncRNA:CR44022	NR_074064	5.55569	-0.0749573	1.89031	0.169169	0.771678	1
whip	NM_001103760	5.55181	-0.0772211	1.88786	0.169447	0.770966	1
snoRNA:Psi18S-1377a	NR_002506	5.54921	-0.0787318	1.88621	0.169632	0.770491	1
CG12535	NM_001297909	5.54661	-0.0802438	1.88457	0.169819	0.770015	1
CG14205	NM_134479	5.54661	-0.0802438	1.88457	0.169819	0.770015	1
lncRNA:CR46475	NR_167861	5.54661	-0.0802438	1.88457	0.169819	0.770015	1
lncRNA:CR45312	NR_124542	5.54531	-0.0810002	1.88375	0.169912	0.769777	1
CG31717	NM_164902	5.5414	-0.0832712	1.88128	0.170192	0.76906	1
CG5004	NM_001201726	5.53879	-0.0847868	1.87962	0.17038	0.768582	1
CG30288	NM_001103928	5.53879	-0.0847868	1.87962	0.17038	0.768582	1
CG44521	NM_001300019	5.53879	-0.0847868	1.87962	0.17038	0.768582	1
mtd	NM_001144534	5.53879	-0.0847868	1.87962	0.17038	0.768582	1
Rel	NM_057746	5.53879	-0.0847868	1.87962	0.17038	0.768582	1
Acp98AB	NM_001276097	5.53879	-0.0847868	1.87962	0.17038	0.768582	1
wls	NM_140188	5.53748	-0.0855451	1.8788	0.170474	0.768342	1
Scsalpha2	NM_142552	5.53748	-0.0855451	1.8788	0.170474	0.768342	1
SKIP	NM_001275899	5.53617	-0.0863036	1.87797	0.170568	0.768102	1
asRNA:CR45804	NR_133199	5.53486	-0.0870625	1.87714	0.170662	0.767862	1
lncRNA:CR45647	NR_125233	5.53445	-0.104106	1.86915	0.171575	0.765545	1
CG31075	NM_170304	5.53445	-0.104106	1.86915	0.171575	0.765545	1
CG31681	NM_164473	5.53355	-0.0878216	1.87631	0.170757	0.767622	1
Nox	NM_001299557	5.53355	-0.0878216	1.87631	0.170757	0.767622	1
Asator	NM_166766	5.53224	-0.0885811	1.87548	0.170851	0.767381	1
AP-2alpha	NM_205885	5.53224	-0.0885811	1.87548	0.170851	0.767381	1
CG5347	NM_132742	5.53093	-0.0893408	1.87465	0.170946	0.767141	1
mir-976	NR_047850	5.53093	-0.0893408	1.87465	0.170946	0.767141	1
CG43814	NM_001273617	5.53093	-0.0893408	1.87465	0.170946	0.767141	1
	NM_080149	5.53093	-0.0893408	1.87465	0.170946	0.767141	1
mir-989	NR_048107	5.53093	-0.0893408	1.87465	0.170946	0.767141	1
SmydA-7	NM_001274110	5.53093	-0.0893408	1.87465	0.170946	0.767141	1
CG5111	NM_143145	5.53093	-0.0893408	1.87465	0.170946	0.767141	1
snoRNA:Psi28S-2949	NR_003786	5.51972	-0.112605	1.85979	0.172652	0.76283	1
lncRNA:CR45327	NR_124694	5.49946	-0.124281	1.84692	0.174145	0.759089	1
CG15873	NM_138066	5.48981	-0.129716	1.84084	0.174856	0.757321	1
chm	NM_001273263	5.48975	1.84693	3.72915	0.0534735	1.27186	1
Jafrac1	NM_058162	5.47946	-0.123711	1.83992	0.174963	0.757053	1
CG6508	NM_135613	5.47946	-0.123711	1.83992	0.174963	0.757053	1
Or42b	NM_078900	5.47946	-0.123711	1.83992	0.174963	0.757053	1
Ir68b	NM_140291	5.47946	-0.123711	1.83992	0.174963	0.757053	1
lncRNA:CR43991	NR_124899	5.47946	-0.123711	1.83992	0.174963	0.757053	1
asRNA:CR45145	NR_124589	5.47674	-0.125266	1.8382	0.175165	0.756552	1
CG9498	NM_135171	5.47221	-0.145792	1.8268	0.176509	0.753233	1
CG32237	NM_168104	5.47221	-0.145792	1.8268	0.176509	0.753233	1
CG15641	NM_132801	5.4699	-0.129159	1.83388	0.175673	0.755296	1
Sgf29	NM_001299744	5.4699	-0.129159	1.83388	0.175673	0.755296	1
CG15721	NM_132616	5.46716	-0.130718	1.83215	0.175876	0.754792	1
CG6106	NM_001298474	5.46304	-0.133059	1.82955	0.176183	0.754035	1
Sxl	NM_001169218	5.46166	-0.13384	1.82868	0.176286	0.753782	1
Vha16-4	NM_137325	5.46166	-0.13384	1.82868	0.176286	0.753782	1
CG10543	NM_176241	5.4589	-0.135403	1.82694	0.176492	0.753276	1
Gr98a	NM_143307	5.4579	-0.14777	1.82068	0.177236	0.751449	1
l(2)gd1	NM_001259047	5.45752	-0.136186	1.82607	0.176595	0.753022	1
Dscam1	NM_001043016	5.45614	-0.136968	1.8252	0.176698	0.752768	1
CG17650	NM_134777	5.45475	-0.137751	1.82433	0.176801	0.752514	1
Crtp	NM_079997	5.45475	-0.137751	1.82433	0.176801	0.752514	1
CG7465	NM_139652	5.45475	-0.137751	1.82433	0.176801	0.752514	1
rols	NM_140285	5.45475	-0.137751	1.82433	0.176801	0.752514	1
CG13058	NM_140620	5.45475	-0.137751	1.82433	0.176801	0.752514	1
CG31802	NM_165246	5.44379	-0.155661	1.81179	0.178296	0.748858	1
PCNA	NM_057557	5.44129	-0.163286	1.8072	0.178848	0.747516	1
lncRNA:CR44265	NR_125221	5.43849	-0.164898	1.8054	0.179064	0.746993	1
l(2)k09848	NM_001201938	5.42559	-0.172091	1.79727	0.180046	0.744616	1
lncRNA:CR45618	NR_123873	5.40972	-0.180936	1.78725	0.181264	0.741688	1
lncRNA:CR42874	NR_037728	5.39898	-0.174191	1.78675	0.181326	0.74154	1
TTLL6A	NM_137589	5.39898	-0.174191	1.78675	0.181326	0.74154	1
CG7551	NM_140209	5.39898	-0.174191	1.78675	0.181326	0.74154	1
CG31220	NM_169868	5.39898	-0.174191	1.78675	0.181326	0.74154	1
asRNA:CR46487	NR_167881	5.39754	-0.174992	1.78584	0.181437	0.741275	1
Zdhhc8	NM_001258663	5.3961	-0.175794	1.78494	0.181547	0.74101	1
Rsph9	NM_165215	5.39466	-0.176597	1.78403	0.181658	0.740745	1
CG18568	NM_001299470	5.39322	-0.177399	1.78312	0.181769	0.740479	1
Ugt37B1	NM_080269	5.39177	-0.178202	1.78221	0.181881	0.740213	1
lncRNA:CR46475	NR_167859	5.39033	-0.179006	1.7813	0.181992	0.739947	1
lncRNA:CR45617	NR_123863	5.38888	-0.179809	1.7804	0.182104	0.739681	1
Ir48c	NM_136856	5.38743	-0.180613	1.77949	0.182215	0.739415	1
CG10845	NM_143052	5.38743	-0.180613	1.77949	0.182215	0.739415	1
lncRNA:CR46265	NR_133417	5.38598	-0.181418	1.77857	0.182327	0.739148	1
Gpo1	NM_137219	5.38307	-0.183028	1.77675	0.182552	0.738614	1
CG12769	NM_136503	5.38307	-0.183028	1.77675	0.182552	0.738614	1
Chro	NM_141169	5.38307	-0.183028	1.77675	0.182552	0.738614	1
Lar	NM_001273667	5.38162	-0.183833	1.77584	0.182664	0.738346	1
lncRNA:CR45004	NR_124404	5.38162	-0.183833	1.77584	0.182664	0.738346	1
CG5107	NM_143144	5.38016	-0.184639	1.77492	0.182777	0.738079	1
lncRNA:CR44991	NR_124146	5.37871	-0.185445	1.77401	0.18289	0.737811	1
snoRNA:Psi18S-525a	NR_003764	5.37871	-0.185445	1.77401	0.18289	0.737811	1
CkIIalpha	NM_001300223	5.37871	-0.185445	1.77401	0.18289	0.737811	1
asRNA:CR44961	NR_123915	5.37579	-0.187058	1.77218	0.183116	0.737274	1
PIP4K	NM_001038717	5.37479	-0.206823	1.76195	0.184385	0.734275	1
CG2901	NM_130721	5.37479	-0.206823	1.76195	0.184385	0.734275	1
CG12986	NM_133015	5.37479	-0.206823	1.76195	0.184385	0.734275	1
lncRNA:CR44727	NR_124247	5.37479	-0.206823	1.76195	0.184385	0.734275	1
CG12483	NM_144069	5.37479	-0.206823	1.76195	0.184385	0.734275	1
lncRNA:CR45542	NR_123846	5.37433	-0.187865	1.77126	0.183229	0.737006	1
Sk1	NM_132489	5.37433	-0.187865	1.77126	0.183229	0.737006	1
CG12963	NM_001259412	5.37433	-0.187865	1.77126	0.183229	0.737006	1
CG8299	NM_137222	5.37433	-0.187865	1.77126	0.183229	0.737006	1
Nxt1	NM_001299854	5.37433	-0.187865	1.77126	0.183229	0.737006	1
lncRNA:CR43940	NR_073967	5.37433	-0.187865	1.77126	0.183229	0.737006	1
CG6231	NM_142562	5.37433	-0.187865	1.77126	0.183229	0.737006	1
CG1774	NM_143618	5.37433	-0.187865	1.77126	0.183229	0.737006	1
CG1409	NM_132181	5.37014	-0.20285	1.76231	0.18434	0.73438	1
CG8188	NM_001298455	5.35997	2.53547	6.20461	0.0127433	1.89472	1
Sf3b2	NM_001273050	5.3596	-0.208529	1.75574	0.18516	0.732453	1
Trxr-2	NM_079492	5.34302	-0.217536	1.74536	0.186465	0.729404	1
BORCS6	NM_001274285	5.32776	-0.22575	1.73583	0.187671	0.726603	1
CG6271	NM_143269	5.32491	-0.2341	1.73055	0.188344	0.725048	1
CG15375	NM_131921	5.31374	-0.226524	1.73055	0.188344	0.725048	1
Pkg21D	NM_057865	5.31374	-0.226524	1.73055	0.188344	0.725048	1
lncRNA:CR44725	NR_124678	5.31374	-0.226524	1.73055	0.188344	0.725048	1
l(2)k09913	NM_166584	5.31374	-0.226524	1.73055	0.188344	0.725048	1
CRAT	NM_001043219	5.31374	-0.226524	1.73055	0.188344	0.725048	1
Mst85C	NM_001275470	5.31374	-0.226524	1.73055	0.188344	0.725048	1
lncRNA:CR46087	NR_133468	5.31374	-0.226524	1.73055	0.188344	0.725048	1
lncRNA:CR45030	NR_125289	5.31374	-0.226524	1.73055	0.188344	0.725048	1
Cad89D	NM_142297	5.30915	-0.229008	1.72768	0.18871	0.724204	1
snoRNA:Me28S-A771	NR_003845	5.30303	-0.232325	1.72385	0.189201	0.723076	1
mmd	NM_206752	5.29841	-0.234817	1.72097	0.189572	0.722227	1
lncRNA:CR44937	NR_125118	5.29841	-0.234817	1.72097	0.189572	0.722227	1
prage	NM_166908	5.29533	-0.23648	1.71904	0.189819	0.721659	1
lncRNA:CR43928	NR_124049	5.29533	-0.23648	1.71904	0.189819	0.721659	1
lncRNA:CR45375	NR_124177	5.29378	-0.237312	1.71808	0.189944	0.721375	1
CG13198	NM_136846	5.29378	-0.237312	1.71808	0.189944	0.721375	1
CG8249	NM_001259420	5.29378	-0.237312	1.71808	0.189944	0.721375	1
hrg	NM_166372	5.29224	-0.238144	1.71711	0.190068	0.721091	1
CG13392	NM_001273318	5.28914	-0.23981	1.71518	0.190317	0.720521	1
cora	NM_166336	5.28914	-0.23981	1.71518	0.190317	0.720521	1
CG33680	NM_001032277	5.28914	-0.23981	1.71518	0.190317	0.720521	1
Cks85A	NM_001260063	5.28914	-0.23981	1.71518	0.190317	0.720521	1
tnc	NM_143061	5.28914	-0.23981	1.71518	0.190317	0.720521	1
CG30161	NM_138109	5.27333	-0.261749	1.69829	0.192515	0.715535	1
Utx	NM_001273390	5.27032	-0.270525	1.69262	0.193259	0.713859	1
CG4714	NM_137013	5.27032	-0.270525	1.69262	0.193259	0.713859	1
CG13667	NM_168274	5.27032	-0.270525	1.69262	0.193259	0.713859	1
lncRNA:CR45407	NR_124840	5.27032	-0.270525	1.69262	0.193259	0.713859	1
CG5262	NM_001275180	5.26551	1.54324	2.8974	0.0887258	1.05195	1
CG8952	NM_132844	5.25882	-0.262322	1.693	0.193208	0.713974	1
Edg84A	NM_079523	5.25565	-0.264018	1.69102	0.193469	0.713389	1
CG14817	NM_001297867	5.22313	-0.280853	1.67102	0.196125	0.707466	1
lncRNA:CR44817	NR_123813	5.22313	-0.280853	1.67102	0.196125	0.707466	1
karr	NM_144149	5.22313	-0.280853	1.67102	0.196125	0.707466	1
lncRNA:CR46258	NR_133060	5.22313	-0.280853	1.67102	0.196125	0.707466	1
CG31819	NM_165148	5.22313	-0.280853	1.67102	0.196125	0.707466	1
PpN58A	NM_058036	5.22313	-0.280853	1.67102	0.196125	0.707466	1
lncRNA:CR46003	NR_133206	5.22313	-0.280853	1.67102	0.196125	0.707466	1
Nrx-IV	NM_168491	5.22313	-0.280853	1.67102	0.196125	0.707466	1
lncRNA:CR46197	NR_133244	5.22313	-0.280853	1.67102	0.196125	0.707466	1
Dsp1	NM_167502	5.21826	-0.283421	1.66799	0.19653	0.70657	1
lncRNA:CR44220	NR_073674	5.21826	-0.283421	1.66799	0.19653	0.70657	1
Hr4	NM_001272233	5.2167	-0.298853	1.65917	0.197718	0.703953	1
lncRNA:CR44076	NR_073713	5.2167	-0.298853	1.65917	0.197718	0.703953	1
snRNA:U4:38AB	NR_001670	5.21663	-0.284277	1.66698	0.196666	0.706271	1
Sam-S	NM_164362	5.215	-0.285134	1.66597	0.196802	0.705971	1
hdly	NM_001275860	5.215	-0.285134	1.66597	0.196802	0.705971	1
Tsp5D	NM_078499	5.21337	-0.285992	1.66496	0.196938	0.705672	1
CG1103	NM_141199	5.2101	-0.287708	1.66294	0.19721	0.705071	1
CG6830	NM_141846	5.20846	-0.288566	1.66192	0.197347	0.70477	1
alph	NM_170418	5.20682	-0.289425	1.66091	0.197483	0.704469	1
wech	NM_001144142	5.20518	-0.290284	1.65989	0.197621	0.704168	1
sturkopf	NM_167867	5.20518	-0.290284	1.65989	0.197621	0.704168	1
pAbp	NM_166265	5.20354	-0.291144	1.65888	0.197758	0.703866	1
CG31495	NM_169559	5.2019	-0.292004	1.65786	0.197895	0.703564	1
CG13689	NM_134694	5.1986	-0.293725	1.65582	0.198171	0.70296	1
PpD6	NM_080208	5.1986	-0.293725	1.65582	0.198171	0.70296	1
Snx6	NM_001259010	5.1986	-0.293725	1.65582	0.198171	0.70296	1
Gpb5	NM_001015386	5.1986	-0.293725	1.65582	0.198171	0.70296	1
lncRNA:CR44842	NR_124753	5.1986	-0.293725	1.65582	0.198171	0.70296	1
lncRNA:CR45243	NR_125030	5.1986	-0.293725	1.65582	0.198171	0.70296	1
CG10301	NM_142916	5.1986	-0.293725	1.65582	0.198171	0.70296	1
btz	NM_170350	5.1986	-0.293725	1.65582	0.198171	0.70296	1
Cep135	NM_001274940	5.19838	-0.300941	1.65185	0.19871	0.701781	1
Max	NM_001300185	5.17147	-0.322375	1.63113	0.20155	0.695618	1
CG6415	NM_135597	5.16111	-0.327576	1.62481	0.202426	0.693735	1
CG7970	NM_001316449	5.16111	-0.327576	1.62481	0.202426	0.693735	1
asRNA:CR44181	NR_073755	5.15771	-0.337137	1.61838	0.203321	0.691818	1
	NM_135873	5.15771	-0.337137	1.61838	0.203321	0.691818	1
CG34173	NM_001103717	5.15771	-0.337137	1.61838	0.203321	0.691818	1
CG11458	NM_144026	5.15771	-0.337137	1.61838	0.203321	0.691818	1
CG40160	NM_001170384	5.15771	-0.337137	1.61838	0.203321	0.691818	1
CG34308	NM_001104300	5.15771	-0.337137	1.61838	0.203321	0.691818	1
lncRNA:CR44791	NR_124046	5.13691	-0.347813	1.60552	0.205125	0.687981	1
CG3598	NM_130684	5.12644	-0.337339	1.60791	0.204789	0.688693	1
sordd1	NM_167462	5.12644	-0.337339	1.60791	0.204789	0.688693	1
CG1139	NM_139429	5.12644	-0.337339	1.60791	0.204789	0.688693	1
SCCRO4	NM_001202210	5.12644	-0.337339	1.60791	0.204789	0.688693	1
ND-B14.5AL	NM_141142	5.12644	-0.337339	1.60791	0.204789	0.688693	1
cona	NM_142462	5.12644	-0.337339	1.60791	0.204789	0.688693	1
CG31189	NM_169942	5.12644	-0.337339	1.60791	0.204789	0.688693	1
CG14434	NM_001298040	5.12471	-0.338224	1.60684	0.204939	0.688375	1
lncRNA:CR45414	NR_124826	5.12297	-0.33911	1.60578	0.205089	0.688057	1
snoRNA:CG32479-b	NR_048214	5.12124	-0.339996	1.60471	0.20524	0.687739	1
CG17065	NM_001169334	5.1195	-0.340882	1.60365	0.20539	0.68742	1
14-3-3zeta	NM_165745	5.11776	-0.341769	1.60258	0.205541	0.687101	1
CG5757	NM_001274136	5.11776	-0.341769	1.60258	0.205541	0.687101	1
Pde6	NM_142112	5.11776	-0.341769	1.60258	0.205541	0.687101	1
MED21	NM_001015223	5.11601	-0.342657	1.60151	0.205692	0.686782	1
Sec23	NM_001260003	5.11427	-0.343544	1.60044	0.205844	0.686463	1
CG3337	NM_001316498	5.11427	-0.343544	1.60044	0.205844	0.686463	1
Qsox3	NM_142740	5.11427	-0.343544	1.60044	0.205844	0.686463	1
asRNA:CR43957	NR_073611	5.11252	-0.344432	1.59937	0.205995	0.686143	1
Bsg25D	NM_001273164	5.11252	-0.344432	1.59937	0.205995	0.686143	1
CG11786	NM_001104436	5.11252	-0.344432	1.59937	0.205995	0.686143	1
CG42578	NM_001169336	5.11077	-0.345321	1.5983	0.206147	0.685823	1
CG34185	NM_001103844	5.11077	-0.345321	1.5983	0.206147	0.685823	1
DCTN3-p24	NM_143779	5.11077	-0.345321	1.5983	0.206147	0.685823	1
lncRNA:CR45678	NR_125010	5.11077	-0.345321	1.5983	0.206147	0.685823	1
CG14877	NM_142250	5.11077	-0.345321	1.5983	0.206147	0.685823	1
CG10984	NM_168511	5.10902	-0.34621	1.59723	0.206299	0.685502	1
Rh2	NM_079674	5.10902	-0.34621	1.59723	0.206299	0.685502	1
CG9171	NM_001273177	5.10726	-0.347099	1.59615	0.206452	0.685181	1
Kua	NM_001273692	5.10726	-0.347099	1.59615	0.206452	0.685181	1
snoRNA:Psi18S-176	NR_002554	5.10726	-0.347099	1.59615	0.206452	0.685181	1
Lsp1beta	NM_001298627	5.10551	-0.347988	1.59508	0.206605	0.68486	1
lncRNA:CR45401	NR_124736	5.10551	-0.347988	1.59508	0.206605	0.68486	1
lncRNA:CR45961	NR_133311	5.10551	-0.347988	1.59508	0.206605	0.68486	1
lncRNA:CR44113	NR_073704	5.10375	-0.348879	1.59401	0.206758	0.684539	1
sqh	NM_001297999	5.10199	-0.349769	1.59293	0.206911	0.684217	1
CG2004	NM_001272428	5.10199	-0.349769	1.59293	0.206911	0.684217	1
CG12057	NM_132306	5.10199	-0.349769	1.59293	0.206911	0.684217	1
Chc	NM_001298371	5.10199	-0.349769	1.59293	0.206911	0.684217	1
Abca3	NM_001272836	5.10199	-0.349769	1.59293	0.206911	0.684217	1
sau	NM_001014460	5.10199	-0.349769	1.59293	0.206911	0.684217	1
Rab5	NM_001272997	5.10199	-0.349769	1.59293	0.206911	0.684217	1
Optix	NM_165584	5.10199	-0.349769	1.59293	0.206911	0.684217	1
shn	NM_057375	5.10199	-0.349769	1.59293	0.206911	0.684217	1
CG43389	NM_001259665	5.10199	-0.349769	1.59293	0.206911	0.684217	1
Unr	NM_139969	5.10199	-0.349769	1.59293	0.206911	0.684217	1
ND-AGGG	NM_001015476	5.10199	-0.349769	1.59293	0.206911	0.684217	1
Clbn	NM_143084	5.10199	-0.349769	1.59293	0.206911	0.684217	1
CG10550	NM_170219	5.10199	-0.349769	1.59293	0.206911	0.684217	1
SRPK	NM_166094	5.03559	-0.406938	1.53986	0.214641	0.668287	1
Mpcp2	NM_079345	5.03559	-0.406938	1.53986	0.214641	0.668287	1
Npc2c	NM_141719	5.03559	-0.406938	1.53986	0.214641	0.668287	1
AdamTS-B	NM_132019	5.0228	-0.396161	1.54138	0.214416	0.668743	1
CG10993	NM_132695	5.0228	-0.396161	1.54138	0.214416	0.668743	1
	NM_001382138	5.0228	-0.396161	1.54138	0.214416	0.668743	1
Abcd3	NM_001272804	5.0228	-0.396161	1.54138	0.214416	0.668743	1
CG15450	NM_134565	5.0228	-0.396161	1.54138	0.214416	0.668743	1
lncRNA:CR44185	NR_073672	5.0228	-0.396161	1.54138	0.214416	0.668743	1
lncRNA:CR45311	NR_124614	5.0228	-0.396161	1.54138	0.214416	0.668743	1
AANATL4	NM_137562	5.0228	-0.396161	1.54138	0.214416	0.668743	1
CG34198	NM_001103909	5.0228	-0.396161	1.54138	0.214416	0.668743	1
CG43207	NM_001259547	5.0228	-0.396161	1.54138	0.214416	0.668743	1
lncRNA:CR45156	NR_124781	5.0228	-0.396161	1.54138	0.214416	0.668743	1
CG34452	NM_001300144	5.0228	-0.396161	1.54138	0.214416	0.668743	1
lncRNA:CR45965	NR_133307	5.0228	-0.396161	1.54138	0.214416	0.668743	1
snoRNA:Psi28S-2442b	NR_003885	5.0228	-0.396161	1.54138	0.214416	0.668743	1
Hat1	NM_169106	5.0228	-0.396161	1.54138	0.214416	0.668743	1
CG11608	NM_141961	5.0228	-0.396161	1.54138	0.214416	0.668743	1
Gr93c	NM_169973	5.0228	-0.396161	1.54138	0.214416	0.668743	1
Npl4	NM_143150	5.0228	-0.396161	1.54138	0.214416	0.668743	1
CG9988	NM_143368	5.0228	-0.396161	1.54138	0.214416	0.668743	1
br	NM_166895	5.02094	-0.397079	1.5403	0.214575	0.66842	1
asRNA:CR44201	NR_073852	5.01908	-0.397996	1.53923	0.214735	0.668098	1
lncRNA:CR44339	NR_124537	5.01908	-0.397996	1.53923	0.214735	0.668098	1
Nna1	NM_001103505	5.01721	-0.398914	1.53816	0.214895	0.667775	1
htl	NM_079670	5.01485	-0.417118	1.52788	0.216434	0.664675	1
CG4004	NM_001298237	5.0116	-0.401671	1.53494	0.215376	0.666803	1
CG15431	NM_134987	5.0116	-0.401671	1.53494	0.215376	0.666803	1
CG10947	NM_165328	5.0116	-0.401671	1.53494	0.215376	0.666803	1
CG6733	NM_142866	5.0116	-0.401671	1.53494	0.215376	0.666803	1
Taf12	NM_079596	5.00973	-0.402591	1.53386	0.215537	0.666478	1
CG33099	NM_176537	5.00973	-0.402591	1.53386	0.215537	0.666478	1
S6KL	NM_001258813	5.00785	-0.403511	1.53278	0.215698	0.666154	1
Obp19a	NM_167700	5.00785	-0.403511	1.53278	0.215698	0.666154	1
Ir25a	NM_001273120	5.00785	-0.403511	1.53278	0.215698	0.666154	1
Hsl	NM_166381	5.00785	-0.403511	1.53278	0.215698	0.666154	1
CG14115	NM_140372	5.00785	-0.403511	1.53278	0.215698	0.666154	1
CG5114	NM_001259831	5.00597	-0.404432	1.5317	0.21586	0.665828	1
Ccdc58	NM_140893	5.00409	-0.405353	1.53062	0.216022	0.665503	1
snoRNA:Me28S-U2134b	NR_003887	5.00409	-0.405353	1.53062	0.216022	0.665503	1
CG18493	NM_142546	5.00409	-0.405353	1.53062	0.216022	0.665503	1
CG15199	NM_132461	5.00221	-0.406274	1.52954	0.216184	0.665177	1
asRNA:CR44130	NR_073837	5.00032	-0.407196	1.52846	0.216346	0.66485	1
CG43115	NM_001258613	4.99843	-0.408118	1.52738	0.216509	0.664524	1
mir-283	NR_047809	4.99843	-0.408118	1.52738	0.216509	0.664524	1
lncRNA:CR45710	NR_123949	4.99843	-0.408118	1.52738	0.216509	0.664524	1
CG18266	NM_135101	4.99843	-0.408118	1.52738	0.216509	0.664524	1
PolD3	NM_001201887	4.99843	-0.408118	1.52738	0.216509	0.664524	1
CAH14	NM_137675	4.99843	-0.408118	1.52738	0.216509	0.664524	1
CG30413	NM_166593	4.99843	-0.408118	1.52738	0.216509	0.664524	1
sigmar	NM_137976	4.99843	-0.408118	1.52738	0.216509	0.664524	1
snoRNA:Me28S-G3113b	NR_003842	4.99843	-0.408118	1.52738	0.216509	0.664524	1
CG32148	NM_168602	4.99843	-0.408118	1.52738	0.216509	0.664524	1
Chro	NM_001300221	4.99843	-0.408118	1.52738	0.216509	0.664524	1
Ubc84D	NM_079536	4.99843	-0.408118	1.52738	0.216509	0.664524	1
CG7695	NM_142476	4.99843	-0.408118	1.52738	0.216509	0.664524	1
TwdlS	NM_143234	4.99843	-0.408118	1.52738	0.216509	0.664524	1
lncRNA:CR45168	NR_124906	4.99382	-0.427348	1.51577	0.218263	0.661019	1
Src64B	NM_001014563	4.98647	-0.422244	1.51615	0.218206	0.661134	1
lncRNA:CR45292	NR_124377	4.98265	-0.424116	1.51395	0.21854	0.660469	1
lncRNA:CR44768	NR_124368	4.97665	-0.426788	1.51064	0.219045	0.659468	1
Fer3HCH	NM_132626	4.9725	-0.437627	1.50354	0.220131	0.65732	1
lncRNA:CR46126	NR_133364	4.9725	-0.437627	1.50354	0.220131	0.65732	1
REPTOR	NM_143014	4.94502	1.38063	2.39988	0.121348	0.915969	1
alphaTry	NM_057423	4.93328	-0.447231	1.48608	0.222829	0.652028	1
Hmgs	NM_166168	4.93328	-0.447231	1.48608	0.222829	0.652028	1
Grip	NM_132057	4.91112	-0.457525	1.47361	0.22478	0.648242	1
CG33181	NM_001103442	4.91112	-0.457525	1.47361	0.22478	0.648242	1
CG4301	NM_001258782	4.91112	-0.457525	1.47361	0.22478	0.648242	1
Obp18a	NM_133122	4.91112	-0.457525	1.47361	0.22478	0.648242	1
Gr22f	NM_164437	4.91112	-0.457525	1.47361	0.22478	0.648242	1
lncRNA:CR44396	NR_124322	4.91112	-0.457525	1.47361	0.22478	0.648242	1
CG43338	NM_001259151	4.91112	-0.457525	1.47361	0.22478	0.648242	1
lncRNA:CR43700	NR_073800	4.91112	-0.457525	1.47361	0.22478	0.648242	1
Dscam1	NM_001259249	4.91112	-0.457525	1.47361	0.22478	0.648242	1
dve	NM_057893	4.91112	-0.457525	1.47361	0.22478	0.648242	1
GstE13	NM_001201960	4.91112	-0.457525	1.47361	0.22478	0.648242	1
Galphao	NM_001273940	4.91112	-0.457525	1.47361	0.22478	0.648242	1
CG43396	NM_001259323	4.91112	-0.457525	1.47361	0.22478	0.648242	1
Cpr49Aa	NM_001103815	4.91112	-0.457525	1.47361	0.22478	0.648242	1
CG43071	NM_001299665	4.91112	-0.457525	1.47361	0.22478	0.648242	1
CG34269	NM_001103996	4.91112	-0.457525	1.47361	0.22478	0.648242	1
CG9192	NM_138241	4.91112	-0.457525	1.47361	0.22478	0.648242	1
dikar	NM_206285	4.91112	-0.457525	1.47361	0.22478	0.648242	1
lncRNA:CR46090	NR_133438	4.91112	-0.457525	1.47361	0.22478	0.648242	1
CG6277	NM_143268	4.91112	-0.457525	1.47361	0.22478	0.648242	1
lncRNA:CR46117	NR_133494	4.91112	-0.457525	1.47361	0.22478	0.648242	1
CG11334	NM_001276215	4.91112	-0.457525	1.47361	0.22478	0.648242	1
lncRNA:CR44728	NR_124248	4.90911	-0.458476	1.47247	0.22496	0.647895	1
CG30379	NM_165574	4.9071	-0.459428	1.47133	0.22514	0.647548	1
bdg	NM_166121	4.9071	-0.459428	1.47133	0.22514	0.647548	1
CG14607	NM_141452	4.9071	-0.459428	1.47133	0.22514	0.647548	1
	NM_001370021	4.90509	-0.460381	1.47018	0.22532	0.647201	1
cpx	NM_001170032	4.90509	-0.460381	1.47018	0.22532	0.647201	1
snoRNA:Psi28S-3327a	NR_003869	4.90307	-0.461334	1.46904	0.2255	0.646853	1
Cog1	NM_001275567	4.90307	-0.461334	1.46904	0.2255	0.646853	1
pim	NM_001273405	4.90215	-0.480244	1.46503	0.226134	0.645635	1
CG16743	NM_001273438	4.90215	-0.480244	1.46503	0.226134	0.645635	1
lncRNA:CR43301	NR_048352	4.90105	-0.462287	1.46789	0.225681	0.646505	1
Alms1a	NM_167011	4.89903	-0.463241	1.46675	0.225862	0.646157	1
CG7191	NM_135302	4.89903	-0.463241	1.46675	0.225862	0.646157	1
sax	NM_001259264	4.89903	-0.463241	1.46675	0.225862	0.646157	1
CG43092	NM_001260318	4.89903	-0.463241	1.46675	0.225862	0.646157	1
Dscam1	NM_001043053	4.89701	-0.464195	1.4656	0.226044	0.645808	1
mrj	NM_166154	4.89701	-0.464195	1.4656	0.226044	0.645808	1
Sod2	NM_001299574	4.89701	-0.464195	1.4656	0.226044	0.645808	1
CG42853	NM_001202199	4.89701	-0.464195	1.4656	0.226044	0.645808	1
CG9616	NM_142090	4.89701	-0.464195	1.4656	0.226044	0.645808	1
snoRNA:Psi28S-3405b	NR_003908	4.89498	-0.46515	1.46445	0.226226	0.645458	1
snoRNA:Psi28S-2622	NR_002472	4.89449	-0.474556	1.46252	0.226533	0.644869	1
Ppt1	NM_001298095	4.89295	-0.466105	1.4633	0.226408	0.645109	1
wek	NM_001273543	4.89295	-0.466105	1.4633	0.226408	0.645109	1
CngA	NM_057768	4.89295	-0.466105	1.4633	0.226408	0.645109	1
CG43108	NM_001259461	4.89295	-0.466105	1.4633	0.226408	0.645109	1
Pp4-19C	NM_001298560	4.89092	-0.467061	1.46215	0.22659	0.644758	1
CycE	NM_057611	4.89092	-0.467061	1.46215	0.22659	0.644758	1
Nadsyn	NM_001298295	4.88888	-0.468017	1.461	0.226773	0.644408	1
Herc4	NM_001274320	4.88888	-0.468017	1.461	0.226773	0.644408	1
MED6	NM_143731	4.88742	2.10936	3.93495	0.0472951	1.32518	1
CG45002	NM_001298429	4.88685	-0.468973	1.46003	0.226929	0.644111	1
alpha-Man-Ia	NM_001272473	4.88685	-0.468973	1.46003	0.226929	0.644111	1
CG12702	NM_001298536	4.88685	-0.468973	1.46003	0.226929	0.644111	1
Pif1	NM_001298658	4.88685	-0.468973	1.46003	0.226929	0.644111	1
rost	NM_001273345	4.88685	-0.468973	1.46003	0.226929	0.644111	1
Pxn	NM_167957	4.88685	-0.468973	1.46003	0.226929	0.644111	1
APP-BP1	NM_140178	4.88685	-0.468973	1.46003	0.226929	0.644111	1
lncRNA:CR44718	NR_124873	4.88685	-0.468973	1.46003	0.226929	0.644111	1
CG11529	NM_140301	4.88685	-0.468973	1.46003	0.226929	0.644111	1
cmpy	NM_001259920	4.88685	-0.468973	1.46003	0.226929	0.644111	1
pyd	NM_176426	4.88685	-0.468973	1.46003	0.226929	0.644111	1
asRNA:CR31429	NR_048348	4.88685	-0.468973	1.46003	0.226929	0.644111	1
CG6231	NM_169864	4.88685	-0.468973	1.46003	0.226929	0.644111	1
tx	NM_001300614	4.88685	-0.468973	1.46003	0.226929	0.644111	1
superdeath	NM_170398	4.88685	-0.468973	1.46003	0.226929	0.644111	1
Atg16	NM_001144652	4.88685	-0.468973	1.46003	0.226929	0.644111	1
	NM_001363929	4.8794	-0.490865	1.45825	0.227211	0.643571	1
asRNA:CR44020	NR_073991	4.84437	-0.497576	1.4476	0.228917	0.640323	1
SK	NM_001103415	4.81415	-0.51098	1.43858	0.230372	0.637569	1
C3G	NM_176694	4.79015	-0.521661	1.4314	0.231538	0.635377	1
lncRNA:CR43899	NR_073645	4.79015	-0.521661	1.4314	0.231538	0.635377	1
CG12725	NM_132657	4.79015	-0.521661	1.4314	0.231538	0.635377	1
CG9512	NM_001298324	4.79015	-0.521661	1.4314	0.231538	0.635377	1
mir-4957	NR_047806	4.79015	-0.521661	1.4314	0.231538	0.635377	1
lncRNA:CR45261	NR_124012	4.79015	-0.521661	1.4314	0.231538	0.635377	1
Iris	NM_134726	4.79015	-0.521661	1.4314	0.231538	0.635377	1
Argl	NM_135413	4.79015	-0.521661	1.4314	0.231538	0.635377	1
lncRNA:CR44868	NR_124298	4.79015	-0.521661	1.4314	0.231538	0.635377	1
CG10336	NM_165261	4.79015	-0.521661	1.4314	0.231538	0.635377	1
CG33511	NM_001014492	4.79015	-0.521661	1.4314	0.231538	0.635377	1
	NM_001273808	4.79015	-0.521661	1.4314	0.231538	0.635377	1
CG34190	NM_001103881	4.79015	-0.521661	1.4314	0.231538	0.635377	1
CG10866	NM_001300002	4.79015	-0.521661	1.4314	0.231538	0.635377	1
CG4669	NM_139699	4.79015	-0.521661	1.4314	0.231538	0.635377	1
CG6168	NM_001300103	4.79015	-0.521661	1.4314	0.231538	0.635377	1
lncRNA:CR45399	NR_124935	4.79015	-0.521661	1.4314	0.231538	0.635377	1
lncRNA:CR45577	NR_125136	4.79015	-0.521661	1.4314	0.231538	0.635377	1
lncRNA:CR46009	NR_133376	4.79015	-0.521661	1.4314	0.231538	0.635377	1
CG32473	NM_169503	4.79015	-0.521661	1.4314	0.231538	0.635377	1
lncRNA:CR46036	NR_133414	4.79015	-0.521661	1.4314	0.231538	0.635377	1
DPCoAC	NM_001300501	4.79015	-0.521661	1.4314	0.231538	0.635377	1
CenB1A	NM_170049	4.79015	-0.521661	1.4314	0.231538	0.635377	1
snmRNA:157	NR_002502	4.79015	-0.521661	1.4314	0.231538	0.635377	1
asRNA:CR46109	NR_133480	4.79015	-0.521661	1.4314	0.231538	0.635377	1
snoRNA:Psi18S-525e	NR_003771	4.78797	-0.52265	1.43075	0.231644	0.635178	1
Treh	NM_166424	4.78797	-0.52265	1.43075	0.231644	0.635178	1
snoRNA:Me28S-A774a	NR_003868	4.78797	-0.52265	1.43075	0.231644	0.635178	1
CG31431	NM_001260302	4.78797	-0.52265	1.43075	0.231644	0.635178	1
CG42335	NM_169967	4.7858	-0.523639	1.4301	0.231751	0.634979	1
lncRNA:CR46206	NR_133081	4.78361	-0.524628	1.42945	0.231857	0.634779	1
lok	NM_057871	4.78143	-0.525619	1.42879	0.231964	0.634579	1
RpS7	NM_170477	4.78143	-0.525619	1.42879	0.231964	0.634579	1
snoRNA:nop5-x16-a	NR_047915	4.77924	-0.526609	1.42814	0.232071	0.634379	1
Lrp4	NM_001298378	4.77705	-0.5276	1.42748	0.232178	0.634179	1
clu	NM_001274092	4.77485	-0.528592	1.42683	0.232286	0.633978	1
CG34408	NM_001298149	4.77266	-0.529584	1.42617	0.232393	0.633776	1
CG1628	NM_001272494	4.77266	-0.529584	1.42617	0.232393	0.633776	1
lncRNA:CR42715	NR_133119	4.77266	-0.529584	1.42617	0.232393	0.633776	1
	NM_001370028	4.77266	-0.529584	1.42617	0.232393	0.633776	1
CG15213	NM_144202	4.77266	-0.529584	1.42617	0.232393	0.633776	1
Gem2	NM_140835	4.77266	-0.529584	1.42617	0.232393	0.633776	1
CG1024	NM_141395	4.77266	-0.529584	1.42617	0.232393	0.633776	1
CG9853	NM_001104210	4.77045	-0.530576	1.42551	0.232501	0.633575	1
Gclc	NM_001298073	4.76825	-0.531569	1.42485	0.232609	0.633373	1
CG6441	NM_164753	4.76825	-0.531569	1.42485	0.232609	0.633373	1
asRNA:CR44019	NR_156772	4.76825	-0.531569	1.42485	0.232609	0.633373	1
snoRNA:CD-24	NR_073613	4.76604	-0.532563	1.42419	0.232718	0.633171	1
Rcd-1	NM_001272793	4.76604	-0.532563	1.42419	0.232718	0.633171	1
CG32820	NM_167764	4.76604	-0.532563	1.42419	0.232718	0.633171	1
GABPI	NM_001298644	4.76604	-0.532563	1.42419	0.232718	0.633171	1
dpr19	NM_001273407	4.76604	-0.532563	1.42419	0.232718	0.633171	1
lncRNA:CR44904	NR_124370	4.76604	-0.532563	1.42419	0.232718	0.633171	1
Amacr	NM_001273709	4.76604	-0.532563	1.42419	0.232718	0.633171	1
CG44438	NM_001299214	4.76604	-0.532563	1.42419	0.232718	0.633171	1
CG12831	NM_001299225	4.76604	-0.532563	1.42419	0.232718	0.633171	1
CG1620	NM_136443	4.76604	-0.532563	1.42419	0.232718	0.633171	1
mir-4981	NR_048060	4.76604	-0.532563	1.42419	0.232718	0.633171	1
CG8180	NM_001299529	4.76604	-0.532563	1.42419	0.232718	0.633171	1
CG6910	NM_140299	4.76604	-0.532563	1.42419	0.232718	0.633171	1
CG43980	NM_206420	4.76604	-0.532563	1.42419	0.232718	0.633171	1
CG42544	NM_001170068	4.76604	-0.532563	1.42419	0.232718	0.633171	1
CG12948	NM_001300334	4.76604	-0.532563	1.42419	0.232718	0.633171	1
CG34309	NM_001104301	4.76604	-0.532563	1.42419	0.232718	0.633171	1
lncRNA:bxd	NR_002033	4.76604	-0.532563	1.42419	0.232718	0.633171	1
CG42821	NM_001038971	4.76604	-0.532563	1.42419	0.232718	0.633171	1
lncRNA:CR44178	NR_125218	4.76604	-0.532563	1.42419	0.232718	0.633171	1
CG42828	NM_001202342	4.76604	-0.532563	1.42419	0.232718	0.633171	1
Lsd-1	NM_142926	4.76604	-0.532563	1.42419	0.232718	0.633171	1
Tusp	NM_001202374	4.76604	-0.532563	1.42419	0.232718	0.633171	1
mei-S332	NM_001299776	4.76163	1.11123	1.98742	0.158614	0.799659	1
CG11034	NM_001298709	4.75485	-0.557421	1.42109	0.233226	0.632223	1
Idgf6	NM_001299570	4.75485	-0.557421	1.42109	0.233226	0.632223	1
CG13541	NM_001299833	4.75485	-0.557421	1.42109	0.233226	0.632223	1
Naa30B	NM_167877	4.72972	-0.568522	1.41453	0.234309	0.630211	1
lncRNA:CR42719	NR_124744	4.70418	-0.579679	1.40795	0.2354	0.628194	1
UQCR-6.4L	NM_001259865	4.70418	-0.579679	1.40795	0.2354	0.628194	1
pdgy	NM_001201661	4.65812	-0.588836	1.39489	0.237584	0.624182	1
Yp3	NM_001298299	4.65812	-0.588836	1.39489	0.237584	0.624182	1
Tengl3	NM_134816	4.65812	-0.588836	1.39489	0.237584	0.624182	1
Bsg	NM_164787	4.65812	-0.588836	1.39489	0.237584	0.624182	1
CG8997	NM_001298983	4.65812	-0.588836	1.39489	0.237584	0.624182	1
ProtB	NM_057703	4.65812	-0.588836	1.39489	0.237584	0.624182	1
CG31798	NM_165292	4.65812	-0.588836	1.39489	0.237584	0.624182	1
CG10189	NM_001273656	4.65812	-0.588836	1.39489	0.237584	0.624182	1
CG6209	NM_137050	4.65812	-0.588836	1.39489	0.237584	0.624182	1
CG15096	NM_137532	4.65812	-0.588836	1.39489	0.237584	0.624182	1
pirk	NM_001299757	4.65812	-0.588836	1.39489	0.237584	0.624182	1
Obp58b	NM_137865	4.65812	-0.588836	1.39489	0.237584	0.624182	1
CG18128	NM_137978	4.65812	-0.588836	1.39489	0.237584	0.624182	1
lncRNA:Yu	NR_037745	4.65812	-0.588836	1.39489	0.237584	0.624182	1
lncRNA:CR45826	NR_133157	4.65812	-0.588836	1.39489	0.237584	0.624182	1
CG15822	NM_001144400	4.65812	-0.588836	1.39489	0.237584	0.624182	1
CG15212	NM_144201	4.65812	-0.588836	1.39489	0.237584	0.624182	1
alphaKap4	NM_139750	4.65812	-0.588836	1.39489	0.237584	0.624182	1
lncRNA:CR45246	NR_124861	4.65812	-0.588836	1.39489	0.237584	0.624182	1
lncRNA:CR45753	NR_124924	4.65812	-0.588836	1.39489	0.237584	0.624182	1
lncRNA:CR46482	NR_167870	4.65812	-0.588836	1.39489	0.237584	0.624182	1
Dys	NM_001275801	4.65812	-0.588836	1.39489	0.237584	0.624182	1
lncRNA:CR45762	NR_133333	4.65812	-0.588836	1.39489	0.237584	0.624182	1
lncRNA:CR44334	NR_125096	4.65812	-0.588836	1.39489	0.237584	0.624182	1
CG42489	NM_001275449	4.65812	-0.588836	1.39489	0.237584	0.624182	1
CG17738	NM_141915	4.65812	-0.588836	1.39489	0.237584	0.624182	1
CG10013	NM_141918	4.65812	-0.588836	1.39489	0.237584	0.624182	1
GstD8	NM_080177	4.65812	-0.588836	1.39489	0.237584	0.624182	1
GstD1	NM_001038953	4.65812	-0.588836	1.39489	0.237584	0.624182	1
CG43179	NM_001260165	4.65812	-0.588836	1.39489	0.237584	0.624182	1
CG45079	NM_001300442	4.65812	-0.588836	1.39489	0.237584	0.624182	1
	NM_001275730	4.65812	-0.588836	1.39489	0.237584	0.624182	1
veli	NM_170197	4.65812	-0.588836	1.39489	0.237584	0.624182	1
PH4alphaNE2	NM_170499	4.65812	-0.588836	1.39489	0.237584	0.624182	1
lncRNA:CR44361	NR_124882	4.65181	-0.602161	1.39436	0.237673	0.62402	1
Zif	NM_141400	4.65098	-0.591924	1.39304	0.237896	0.623614	1
Cyp4d1	NM_057559	4.64859	-0.592954	1.39242	0.238	0.623423	1
lncRNA:CR44146	NR_073815	4.64859	-0.592954	1.39242	0.238	0.623423	1
klar	NM_001299960	4.64859	-0.592954	1.39242	0.238	0.623423	1
snoRNA:Me28S-C3351	NR_003853	4.64859	-0.592954	1.39242	0.238	0.623423	1
lncRNA:CR45681	NR_124904	4.64859	-0.592954	1.39242	0.238	0.623423	1
CG41099	NM_001110981	4.64859	-0.592954	1.39242	0.238	0.623423	1
p115	NM_001298063	4.6462	-0.593985	1.3918	0.238104	0.623233	1
lncRNA:CR45463	NR_124119	4.6462	-0.593985	1.3918	0.238104	0.623233	1
pie	NM_001273419	4.6462	-0.593985	1.3918	0.238104	0.623233	1
CG10395	NM_136323	4.6462	-0.593985	1.3918	0.238104	0.623233	1
CG14329	NM_142379	4.6462	-0.593985	1.3918	0.238104	0.623233	1
CG10357	NM_139564	4.6438	-0.595017	1.39118	0.238209	0.623042	1
mdy	NM_206002	4.6422	-0.606345	1.39186	0.238094	0.623252	1
CG42299	NM_167452	4.6414	-0.596049	1.39056	0.238314	0.62285	1
Sps2	NM_058130	4.6414	-0.596049	1.39056	0.238314	0.62285	1
	NM_001382041	4.6414	-0.596049	1.39056	0.238314	0.62285	1
CG15705	NM_137265	4.6414	-0.596049	1.39056	0.238314	0.62285	1
Hr39	NM_057585	4.639	-0.597081	1.38993	0.238419	0.622659	1
Parp16	NM_166177	4.639	-0.597081	1.38993	0.238419	0.622659	1
Magi	NM_137707	4.639	-0.597081	1.38993	0.238419	0.622659	1
CG44253	NM_001169790	4.639	-0.597081	1.38993	0.238419	0.622659	1
Rrp4	NM_137963	4.639	-0.597081	1.38993	0.238419	0.622659	1
asRNA:CR45969	NR_133312	4.639	-0.597081	1.38993	0.238419	0.622659	1
CG11550	NM_143625	4.639	-0.597081	1.38993	0.238419	0.622659	1
Tlk	NM_001272291	4.6366	-0.598114	1.38931	0.238525	0.622466	1
CG9921	NM_001272680	4.6366	-0.598114	1.38931	0.238525	0.622466	1
CycB	NM_166557	4.6366	-0.598114	1.38931	0.238525	0.622466	1
arm	NM_001272220	4.63419	-0.599148	1.38868	0.238631	0.622274	1
Trf4-1	NM_206658	4.63419	-0.599148	1.38868	0.238631	0.622274	1
lncRNA:CR44822	NR_124095	4.63419	-0.599148	1.38868	0.238631	0.622274	1
mir-9c	NR_047967	4.63419	-0.599148	1.38868	0.238631	0.622274	1
CG13272	NM_135967	4.63419	-0.599148	1.38868	0.238631	0.622274	1
CG5050	NM_135995	4.63419	-0.599148	1.38868	0.238631	0.622274	1
CG11211	NM_136364	4.63419	-0.599148	1.38868	0.238631	0.622274	1
ACC	NM_001103756	4.63419	-0.599148	1.38868	0.238631	0.622274	1
snoRNA:Me28S-G3255a	NR_003787	4.63419	-0.599148	1.38868	0.238631	0.622274	1
lncRNA:CR45228	NR_124511	4.63419	-0.599148	1.38868	0.238631	0.622274	1
Spn47C	NM_001299373	4.63419	-0.599148	1.38868	0.238631	0.622274	1
asRNA:CR43964	NR_073888	4.63419	-0.599148	1.38868	0.238631	0.622274	1
CG43277	NM_001259508	4.63419	-0.599148	1.38868	0.238631	0.622274	1
asRNA:CR43812	NR_073891	4.63419	-0.599148	1.38868	0.238631	0.622274	1
snoRNA:Me28S-A2589a	NR_003810	4.63419	-0.599148	1.38868	0.238631	0.622274	1
lncRNA:CR44531	NR_124765	4.63419	-0.599148	1.38868	0.238631	0.622274	1
lncRNA:CR45440	NR_124805	4.63419	-0.599148	1.38868	0.238631	0.622274	1
Nplp2	NM_001300130	4.63419	-0.599148	1.38868	0.238631	0.622274	1
CG5895	NM_001169981	4.63419	-0.599148	1.38868	0.238631	0.622274	1
CG33257	NM_206385	4.63419	-0.599148	1.38868	0.238631	0.622274	1
fbl	NM_168851	4.63419	-0.599148	1.38868	0.238631	0.622274	1
Cyp313b1	NM_001300310	4.63419	-0.599148	1.38868	0.238631	0.622274	1
asRNA:CR46145	NR_133368	4.63419	-0.599148	1.38868	0.238631	0.622274	1
CG31326	NM_142087	4.63419	-0.599148	1.38868	0.238631	0.622274	1
SNF4Agamma	NM_169948	4.63419	-0.599148	1.38868	0.238631	0.622274	1
CG9313	NM_001299727	4.59517	-0.625925	1.37951	0.240187	0.61945	1
CG33985	NM_001038929	4.59079	-0.638897	1.37944	0.240199	0.61943	1
CG43291	NM_001316577	4.59079	-0.638897	1.37944	0.240199	0.61943	1
lncRNA:CR44041	NR_074069	4.59079	-0.638897	1.37944	0.240199	0.61943	1
CG6701	NM_001201995	4.5827	-0.631213	1.37623	0.240747	0.618439	1
CG11164	NM_001298291	4.52867	-0.653144	1.36189	0.243212	0.614015	1
trol	NM_001258566	4.51277	-0.659356	1.35764	0.243949	0.612701	1
U2af50	NM_001258779	4.51277	-0.659356	1.35764	0.243949	0.612701	1
Obp19d	NM_078697	4.51277	-0.659356	1.35764	0.243949	0.612701	1
CG2983	NM_134879	4.51277	-0.659356	1.35764	0.243949	0.612701	1
CG34126	NM_001273139	4.51277	-0.659356	1.35764	0.243949	0.612701	1
CG14535	NM_001298797	4.51277	-0.659356	1.35764	0.243949	0.612701	1
CG31710	NM_001273366	4.51277	-0.659356	1.35764	0.243949	0.612701	1
lncRNA:CR44587	NR_124211	4.51277	-0.659356	1.35764	0.243949	0.612701	1
asRNA:CR44600	NR_124234	4.51277	-0.659356	1.35764	0.243949	0.612701	1
CG12448	NM_165140	4.51277	-0.659356	1.35764	0.243949	0.612701	1
CG13284	NM_001273593	4.51277	-0.659356	1.35764	0.243949	0.612701	1
lncRNA:CR45722	NR_124382	4.51277	-0.659356	1.35764	0.243949	0.612701	1
EcR	NM_165461	4.51277	-0.659356	1.35764	0.243949	0.612701	1
Drep3	NM_136879	4.51277	-0.659356	1.35764	0.243949	0.612701	1
NAT1	NM_143770	4.51277	-0.659356	1.35764	0.243949	0.612701	1
CG42807	NM_166009	4.51277	-0.659356	1.35764	0.243949	0.612701	1
CG12963	NM_001274073	4.51277	-0.659356	1.35764	0.243949	0.612701	1
lncRNA:CR42736	NR_124617	4.51277	-0.659356	1.35764	0.243949	0.612701	1
Tim10	NM_166474	4.51277	-0.659356	1.35764	0.243949	0.612701	1
CG11269	NM_137800	4.51277	-0.659356	1.35764	0.243949	0.612701	1
CG34268	NM_001103995	4.51277	-0.659356	1.35764	0.243949	0.612701	1
CG9173	NM_138264	4.51277	-0.659356	1.35764	0.243949	0.612701	1
asRNA:CR11538	NR_133226	4.51277	-0.659356	1.35764	0.243949	0.612701	1
CG34451	NM_001259846	4.51277	-0.659356	1.35764	0.243949	0.612701	1
Adgf-A2	NM_080281	4.51277	-0.659356	1.35764	0.243949	0.612701	1
CG34260	NM_001275191	4.51277	-0.659356	1.35764	0.243949	0.612701	1
lncRNA:CR45431	NR_125044	4.51277	-0.659356	1.35764	0.243949	0.612701	1
CG1116	NM_169028	4.51277	-0.659356	1.35764	0.243949	0.612701	1
lncRNA:CR44926	NR_125078	4.51277	-0.659356	1.35764	0.243949	0.612701	1
CG14357	NM_142079	4.51277	-0.659356	1.35764	0.243949	0.612701	1
lncRNA:CR44177	NR_074014	4.51277	-0.659356	1.35764	0.243949	0.612701	1
CG34276	NM_001275687	4.51277	-0.659356	1.35764	0.243949	0.612701	1
CG32855	NM_169704	4.51277	-0.659356	1.35764	0.243949	0.612701	1
lncRNA:CR45640	NR_125175	4.51277	-0.659356	1.35764	0.243949	0.612701	1
CG7059	NM_170008	4.51277	-0.659356	1.35764	0.243949	0.612701	1
Mst57Da	NM_080167	4.51277	-0.659356	1.35764	0.243949	0.612701	1
Jon99Cii	NM_079830	4.51277	-0.659356	1.35764	0.243949	0.612701	1
CG45073	NM_001300672	4.51277	-0.659356	1.35764	0.243949	0.612701	1
lncRNA:CR46207	NR_133495	4.51277	-0.659356	1.35764	0.243949	0.612701	1
CG15602	NM_001298369	4.51015	-0.660429	1.35695	0.24407	0.612485	1
CG30015	NM_001273945	4.51015	-0.660429	1.35695	0.24407	0.612485	1
asRNA:CR44375	NR_124576	4.51015	-0.660429	1.35695	0.24407	0.612485	1
RIC-3	NM_001274184	4.51015	-0.660429	1.35695	0.24407	0.612485	1
asRNA:CR45326	NR_124715	4.51015	-0.660429	1.35695	0.24407	0.612485	1
SpdS	NM_169298	4.51015	-0.660429	1.35695	0.24407	0.612485	1
OtopLa	NM_001169205	4.50753	-0.661502	1.35625	0.244192	0.612269	1
cype	NM_001258956	4.50753	-0.661502	1.35625	0.244192	0.612269	1
CG8668	NM_001298811	4.50753	-0.661502	1.35625	0.244192	0.612269	1
nub	NM_057311	4.50753	-0.661502	1.35625	0.244192	0.612269	1
thr	NM_001299623	4.50753	-0.661502	1.35625	0.244192	0.612269	1
lncRNA:CR44814	NR_124721	4.50753	-0.661502	1.35625	0.244192	0.612269	1
CG33459	NM_206133	4.5049	-0.662576	1.35555	0.244314	0.612052	1
Svil	NM_167948	4.5049	-0.662576	1.35555	0.244314	0.612052	1
POLDIP2	NM_141283	4.5049	-0.662576	1.35555	0.244314	0.612052	1
CG34404	NM_142199	4.5049	-0.662576	1.35555	0.244314	0.612052	1
CG9281	NM_167458	4.50227	-0.66365	1.35484	0.244436	0.611835	1
lncRNA:CR45338	NR_124041	4.50227	-0.66365	1.35484	0.244436	0.611835	1
coro	NM_001273814	4.50227	-0.66365	1.35484	0.244436	0.611835	1
mir-956	NR_048265	4.50227	-0.66365	1.35484	0.244436	0.611835	1
snoRNA:Psi18S-640g	NR_003779	4.49963	-0.664724	1.35414	0.244558	0.611618	1
PGRP-LD	NM_001144421	4.49963	-0.664724	1.35414	0.244558	0.611618	1
CG45076	NM_001300346	4.49963	-0.664724	1.35414	0.244558	0.611618	1
lncRNA:CR43912	NR_133231	4.49699	-0.6658	1.35344	0.244681	0.6114	1
Taf4	NM_168651	4.49699	-0.6658	1.35344	0.244681	0.6114	1
CG32017	NM_001169364	4.4917	-0.667952	1.35202	0.244928	0.610962	1
snoRNA:Or-CD10	NR_002462	4.4917	-0.667952	1.35202	0.244928	0.610962	1
lncRNA:CR45541	NR_123845	4.4917	-0.667952	1.35202	0.244928	0.610962	1
CG15458	NM_144036	4.4917	-0.667952	1.35202	0.244928	0.610962	1
chrb	NM_001300105	4.4917	-0.667952	1.35202	0.244928	0.610962	1
Ank	NM_175928	4.48904	-0.669029	1.35131	0.245051	0.610743	1
Ten-a	NM_001258713	4.48904	-0.669029	1.35131	0.245051	0.610743	1
HDAC6	NM_001258752	4.48904	-0.669029	1.35131	0.245051	0.610743	1
HDAC6	NM_001258751	4.48904	-0.669029	1.35131	0.245051	0.610743	1
CycD	NM_167473	4.48904	-0.669029	1.35131	0.245051	0.610743	1
lncRNA:CR46328	NR_156779	4.48904	-0.669029	1.35131	0.245051	0.610743	1
CG43707	NM_001273075	4.48904	-0.669029	1.35131	0.245051	0.610743	1
CG7742	NM_001298686	4.48904	-0.669029	1.35131	0.245051	0.610743	1
Fkbp59	NM_001298855	4.48904	-0.669029	1.35131	0.245051	0.610743	1
CG4970	NM_001032082	4.48904	-0.669029	1.35131	0.245051	0.610743	1
lncRNA:CR45354	NR_124308	4.48904	-0.669029	1.35131	0.245051	0.610743	1
Dscam1	NM_001043029	4.48904	-0.669029	1.35131	0.245051	0.610743	1
Pal1	NM_136693	4.48904	-0.669029	1.35131	0.245051	0.610743	1
lncRNA:CR43831	NR_073878	4.48904	-0.669029	1.35131	0.245051	0.610743	1
CG11345	NM_139647	4.48904	-0.669029	1.35131	0.245051	0.610743	1
CG13024	NM_140667	4.48904	-0.669029	1.35131	0.245051	0.610743	1
Su(var)3-3	NM_140937	4.48904	-0.669029	1.35131	0.245051	0.610743	1
beat-Vb	NM_001275582	4.48904	-0.669029	1.35131	0.245051	0.610743	1
Tm1	NM_001260190	4.48904	-0.669029	1.35131	0.245051	0.610743	1
Doa	NM_001260424	4.48904	-0.669029	1.35131	0.245051	0.610743	1
spz5	NM_139496	4.44214	0.851703	1.62571	0.202301	0.694002	1
GluRIIB	NM_078761	4.40568	-0.725173	1.33058	0.248704	0.604317	1
CG7786	NM_137257	4.40568	-0.725173	1.33058	0.248704	0.604317	1
Ir56d	NM_137588	4.40568	-0.725173	1.33058	0.248704	0.604317	1
Mlp60A	NM_001299891	4.40568	-0.725173	1.33058	0.248704	0.604317	1
CG42841	NM_001274374	4.40568	-0.725173	1.33058	0.248704	0.604317	1
JIL-1	NM_168439	4.40568	-0.725173	1.33058	0.248704	0.604317	1
CG11373	NM_144062	4.40568	-0.725173	1.33058	0.248704	0.604317	1
asRNA:CR45135	NR_124504	4.39233	2.53493	4.73664	0.0295289	1.52975	1
CG34461	NM_001274647	4.38311	-0.721532	1.32352	0.249963	0.602123	1
kek3	NM_001169515	4.37652	3.75444	12.2513	0.000465716	3.33188	1
CG43244	NM_001259346	4.36299	-0.729344	1.31803	0.250949	0.600415	1
CG3777	NM_001297804	4.35111	-0.733578	1.31486	0.251519	0.599429	1
CG11664	NM_130509	4.35111	-0.733578	1.31486	0.251519	0.599429	1
lncRNA:CR45529	NR_123806	4.35111	-0.733578	1.31486	0.251519	0.599429	1
CG7884	NM_133138	4.35111	-0.733578	1.31486	0.251519	0.599429	1
mir-974	NR_047840	4.35111	-0.733578	1.31486	0.251519	0.599429	1
bark	NM_001258936	4.35111	-0.733578	1.31486	0.251519	0.599429	1
CG31948	NM_164482	4.35111	-0.733578	1.31486	0.251519	0.599429	1
Coprox	NM_001298768	4.35111	-0.733578	1.31486	0.251519	0.599429	1
Spn28Da	NM_001042880	4.35111	-0.733578	1.31486	0.251519	0.599429	1
Mal-B1	NM_135678	4.35111	-0.733578	1.31486	0.251519	0.599429	1
ACXB	NM_138989	4.35111	-0.733578	1.31486	0.251519	0.599429	1
CG33679	NM_001032102	4.35111	-0.733578	1.31486	0.251519	0.599429	1
amd	NM_057244	4.35111	-0.733578	1.31486	0.251519	0.599429	1
lncRNA:CR45700	NR_124380	4.35111	-0.733578	1.31486	0.251519	0.599429	1
lncRNA:CR45723	NR_124383	4.35111	-0.733578	1.31486	0.251519	0.599429	1
snoRNA:Psi18S-525j	NR_003780	4.35111	-0.733578	1.31486	0.251519	0.599429	1
Dscam1	NM_001043047	4.35111	-0.733578	1.31486	0.251519	0.599429	1
conu	NM_001042993	4.35111	-0.733578	1.31486	0.251519	0.599429	1
stw	NM_165431	4.35111	-0.733578	1.31486	0.251519	0.599429	1
asRNA:CR44165	NR_073844	4.35111	-0.733578	1.31486	0.251519	0.599429	1
Epac	NM_001273807	4.35111	-0.733578	1.31486	0.251519	0.599429	1
CG8726	NM_001169608	4.35111	-0.733578	1.31486	0.251519	0.599429	1
CG43188	NM_001259331	4.35111	-0.733578	1.31486	0.251519	0.599429	1
snoRNA:Me18S-C1366	NR_003794	4.35111	-0.733578	1.31486	0.251519	0.599429	1
CG15711	NM_001299561	4.35111	-0.733578	1.31486	0.251519	0.599429	1
Gbp1	NM_137350	4.35111	-0.733578	1.31486	0.251519	0.599429	1
Dp1	NM_166282	4.35111	-0.733578	1.31486	0.251519	0.599429	1
Idgf5	NM_137477	4.35111	-0.733578	1.31486	0.251519	0.599429	1
lncRNA:CR44572	NR_124635	4.35111	-0.733578	1.31486	0.251519	0.599429	1
plu	NM_057335	4.35111	-0.733578	1.31486	0.251519	0.599429	1
HmgZ	NM_001299766	4.35111	-0.733578	1.31486	0.251519	0.599429	1
CG11474	NM_166504	4.35111	-0.733578	1.31486	0.251519	0.599429	1
CG42694	NM_001274218	4.35111	-0.733578	1.31486	0.251519	0.599429	1
eIF2Bdelta	NM_166601	4.35111	-0.733578	1.31486	0.251519	0.599429	1
pita	NM_166607	4.35111	-0.733578	1.31486	0.251519	0.599429	1
MCU	NM_001259718	4.35111	-0.733578	1.31486	0.251519	0.599429	1
ACXD	NM_001274391	4.35111	-0.733578	1.31486	0.251519	0.599429	1
CG32259	NM_168054	4.35111	-0.733578	1.31486	0.251519	0.599429	1
CG33946	NM_001316477	4.35111	-0.733578	1.31486	0.251519	0.599429	1
CG13306	NM_144187	4.35111	-0.733578	1.31486	0.251519	0.599429	1
CG33702	NM_001031949	4.35111	-0.733578	1.31486	0.251519	0.599429	1
mir-314	NR_048263	4.35111	-0.733578	1.31486	0.251519	0.599429	1
lncRNA:CR44554	NR_124916	4.35111	-0.733578	1.31486	0.251519	0.599429	1
Ogdh	NM_168702	4.35111	-0.733578	1.31486	0.251519	0.599429	1
CG12746	NM_176406	4.35111	-0.733578	1.31486	0.251519	0.599429	1
CG10903	NM_141505	4.35111	-0.733578	1.31486	0.251519	0.599429	1
ssp5	NM_141892	4.35111	-0.733578	1.31486	0.251519	0.599429	1
CG31342	NM_001104294	4.35111	-0.733578	1.31486	0.251519	0.599429	1
mir-995	NR_048438	4.35111	-0.733578	1.31486	0.251519	0.599429	1
lncRNA:CR45651	NR_125251	4.35111	-0.733578	1.31486	0.251519	0.599429	1
BG642167	NM_001043293	4.35111	-0.733578	1.31486	0.251519	0.599429	1
lncRNA:CR45788	NR_133462	4.35111	-0.733578	1.31486	0.251519	0.599429	1
CG13500	NM_137786	4.3482	-0.734698	1.31409	0.251658	0.599189	1
pod1	NM_001258625	4.34527	-0.735819	1.31332	0.251798	0.598948	1
CG32651	NM_167321	4.34527	-0.735819	1.31332	0.251798	0.598948	1
l(1)G0196	NM_001298606	4.34235	-0.73694	1.31254	0.251938	0.598706	1
LRR	NM_165549	4.34235	-0.73694	1.31254	0.251938	0.598706	1
Lis-1	NM_176190	4.34235	-0.73694	1.31254	0.251938	0.598706	1
SKIP	NM_001260305	4.34235	-0.73694	1.31254	0.251938	0.598706	1
lncRNA:CR45575	NR_125115	4.34235	-0.73694	1.31254	0.251938	0.598706	1
CG31388	NM_001260113	4.34235	-0.73694	1.31254	0.251938	0.598706	1
CG5455	NM_170273	4.34235	-0.73694	1.31254	0.251938	0.598706	1
CG43136	NM_001258609	4.33942	-0.738062	1.31176	0.252078	0.598464	1
CG4438	NM_001201824	4.33648	-0.739184	1.31098	0.252219	0.598222	1
CG7294	NM_135594	4.33648	-0.739184	1.31098	0.252219	0.598222	1
CG43332	NM_001259099	4.33648	-0.739184	1.31098	0.252219	0.598222	1
Nlp	NM_079833	4.33648	-0.739184	1.31098	0.252219	0.598222	1
CG3328	NM_001299901	4.33562	-0.75192	1.31184	0.252065	0.598487	1
lncRNA:CR45609	NR_123943	4.33354	-0.740308	1.3102	0.252361	0.597978	1
CG42489	NM_001202264	4.33354	-0.740308	1.3102	0.252361	0.597978	1
lncRNA:CR45539	NR_123841	4.33059	-0.741431	1.30942	0.252502	0.597734	1
Syx6	NM_206092	4.33059	-0.741431	1.30942	0.252502	0.597734	1
lncRNA:CR46214	NR_133256	4.33059	-0.741431	1.30942	0.252502	0.597734	1
CG18234	NM_140786	4.33059	-0.741431	1.30942	0.252502	0.597734	1
4E-T	NM_166798	4.32763	-0.742555	1.30863	0.252645	0.59749	1
CG17778	NM_001297812	4.32763	-0.742555	1.30863	0.252645	0.59749	1
CG11596	NM_130607	4.32763	-0.742555	1.30863	0.252645	0.59749	1
CAH3	NM_001298094	4.32763	-0.742555	1.30863	0.252645	0.59749	1
CG15741	NM_132523	4.32763	-0.742555	1.30863	0.252645	0.59749	1
mir-971	NR_047802	4.32763	-0.742555	1.30863	0.252645	0.59749	1
CG15742	NM_132639	4.32763	-0.742555	1.30863	0.252645	0.59749	1
snoRNA:Psi18S-1854b	NR_003742	4.32763	-0.742555	1.30863	0.252645	0.59749	1
pico	NM_001201746	4.32763	-0.742555	1.30863	0.252645	0.59749	1
bbx	NM_001031916	4.32763	-0.742555	1.30863	0.252645	0.59749	1
ds	NM_078722	4.32763	-0.742555	1.30863	0.252645	0.59749	1
lncRNA:CR45259	NR_124009	4.32763	-0.742555	1.30863	0.252645	0.59749	1
CG43707	NM_134962	4.32763	-0.742555	1.30863	0.252645	0.59749	1
CG7231	NM_164776	4.32763	-0.742555	1.30863	0.252645	0.59749	1
CG4382	NM_135457	4.32763	-0.742555	1.30863	0.252645	0.59749	1
Mabi	NM_135780	4.32763	-0.742555	1.30863	0.252645	0.59749	1
a	NM_166514	4.32763	-0.742555	1.30863	0.252645	0.59749	1
CG14764	NM_001299244	4.32763	-0.742555	1.30863	0.252645	0.59749	1
CG4630	NM_137003	4.32763	-0.742555	1.30863	0.252645	0.59749	1
CG13325	NM_001299446	4.32763	-0.742555	1.30863	0.252645	0.59749	1
Vmat	NM_001274027	4.32763	-0.742555	1.30863	0.252645	0.59749	1
CG8067	NM_001274031	4.32763	-0.742555	1.30863	0.252645	0.59749	1
snoRNA:Me18S-G1952	NR_003798	4.32763	-0.742555	1.30863	0.252645	0.59749	1
CG43371	NM_001259454	4.32763	-0.742555	1.30863	0.252645	0.59749	1
CG43110	NM_001299603	4.32763	-0.742555	1.30863	0.252645	0.59749	1
Klp54D	NM_001259469	4.32763	-0.742555	1.30863	0.252645	0.59749	1
Pde8	NM_137970	4.32763	-0.742555	1.30863	0.252645	0.59749	1
CG12004	NM_167897	4.32763	-0.742555	1.30863	0.252645	0.59749	1
lncRNA:CR45400	NR_124738	4.32763	-0.742555	1.30863	0.252645	0.59749	1
CG5687	NM_001299981	4.32763	-0.742555	1.30863	0.252645	0.59749	1
axo	NM_079917	4.32763	-0.742555	1.30863	0.252645	0.59749	1
CG32373	NM_001274605	4.32763	-0.742555	1.30863	0.252645	0.59749	1
Or71a	NM_079354	4.32763	-0.742555	1.30863	0.252645	0.59749	1
Lmpt	NM_206390	4.32763	-0.742555	1.30863	0.252645	0.59749	1
CG11456	NM_001170013	4.32763	-0.742555	1.30863	0.252645	0.59749	1
CG32452	NM_168956	4.32763	-0.742555	1.30863	0.252645	0.59749	1
lncRNA:CR40053	NR_073977	4.32763	-0.742555	1.30863	0.252645	0.59749	1
CG1092	NM_164325	4.32763	-0.742555	1.30863	0.252645	0.59749	1
asRNA:CR44093	NR_073985	4.32763	-0.742555	1.30863	0.252645	0.59749	1
Son	NM_141657	4.32763	-0.742555	1.30863	0.252645	0.59749	1
GlyS	NM_169610	4.32763	-0.742555	1.30863	0.252645	0.59749	1
CG14893	NM_142311	4.32763	-0.742555	1.30863	0.252645	0.59749	1
eIF1A	NM_206509	4.32763	-0.742555	1.30863	0.252645	0.59749	1
Sfp93F	NM_001170206	4.32763	-0.742555	1.30863	0.252645	0.59749	1
TwdlK	NM_143231	4.30847	-0.761965	1.30455	0.253387	0.596216	1
msi	NM_001276032	4.27906	0.839978	1.51827	0.217884	0.661775	1
RpL36	NM_001297821	4.26726	1.56898	2.17537	0.140239	0.853132	1
Fancm	NM_001275877	4.24023	-0.786813	1.28611	0.256769	0.590457	1
Rs1	NM_001299259	4.2377	0.684435	1.41808	0.233722	0.6313	1
Pex12	NM_001272915	4.23077	-0.790294	1.28354	0.257244	0.589655	1
Ntf-2r	NM_136034	4.22195	1.53268	2.09474	0.14781	0.830298	1
ine	NM_057665	4.19333	-0.816841	1.27418	0.258986	0.586724	1
asRNA:CR43820	NR_073722	4.19333	-0.816841	1.27418	0.258986	0.586724	1
CG5535	NM_168753	4.17936	0.762873	1.42177	0.233115	0.63243	1
fz3	NM_001297831	4.16901	-0.811917	1.26668	0.260394	0.58437	1
lncRNA:CR44834	NR_123795	4.16901	-0.811917	1.26668	0.260394	0.58437	1
CG34417	NM_206636	4.16901	-0.811917	1.26668	0.260394	0.58437	1
Ir7b	NM_132182	4.16901	-0.811917	1.26668	0.260394	0.58437	1
mir-13b-2	NR_047785	4.16901	-0.811917	1.26668	0.260394	0.58437	1
Ypel	NM_001272467	4.16901	-0.811917	1.26668	0.260394	0.58437	1
CG11151	NM_001272602	4.16901	-0.811917	1.26668	0.260394	0.58437	1
snRNA:U5:14B	NR_002129	4.16901	-0.811917	1.26668	0.260394	0.58437	1
snoRNA:Psi18S-1854a	NR_003744	4.16901	-0.811917	1.26668	0.260394	0.58437	1
CG10598	NM_167562	4.16901	-0.811917	1.26668	0.260394	0.58437	1
CG14190	NM_133116	4.16901	-0.811917	1.26668	0.260394	0.58437	1
ccb	NM_134594	4.16901	-0.811917	1.26668	0.260394	0.58437	1
lncRNA:CR44074	NR_073689	4.16901	-0.811917	1.26668	0.260394	0.58437	1
Eogt	NM_134834	4.16901	-0.811917	1.26668	0.260394	0.58437	1
lncRNA:CR45299	NR_124050	4.16901	-0.811917	1.26668	0.260394	0.58437	1
lncRNA:CR44058	NR_124065	4.16901	-0.811917	1.26668	0.260394	0.58437	1
TpnC25D	NM_001298690	4.16901	-0.811917	1.26668	0.260394	0.58437	1
CG14022	NM_135078	4.16901	-0.811917	1.26668	0.260394	0.58437	1
lncRNA:CR31647	NR_047895	4.16901	-0.811917	1.26668	0.260394	0.58437	1
CG31913	NM_164662	4.16901	-0.811917	1.26668	0.260394	0.58437	1
	NM_001370007	4.16901	-0.811917	1.26668	0.260394	0.58437	1
Piezo	NM_001273297	4.16901	-0.811917	1.26668	0.260394	0.58437	1
CG12438	NM_135405	4.16901	-0.811917	1.26668	0.260394	0.58437	1
CYLD	NM_164909	4.16901	-0.811917	1.26668	0.260394	0.58437	1
CG5421	NM_001273489	4.16901	-0.811917	1.26668	0.260394	0.58437	1
CG15293	NM_001298996	4.16901	-0.811917	1.26668	0.260394	0.58437	1
lncRNA:CR43840	NR_073790	4.16901	-0.811917	1.26668	0.260394	0.58437	1
CG4631	NM_135955	4.16901	-0.811917	1.26668	0.260394	0.58437	1
amd	NM_165278	4.16901	-0.811917	1.26668	0.260394	0.58437	1
Pax	NM_001038824	4.16901	-0.811917	1.26668	0.260394	0.58437	1
Roc2	NM_001169648	4.16901	-0.811917	1.26668	0.260394	0.58437	1
CG9410	NM_165481	4.16901	-0.811917	1.26668	0.260394	0.58437	1
LRR	NM_136472	4.16901	-0.811917	1.26668	0.260394	0.58437	1
lncRNA:CR44280	NR_124466	4.16901	-0.811917	1.26668	0.260394	0.58437	1
mlt	NM_165754	4.16901	-0.811917	1.26668	0.260394	0.58437	1
CG13193	NM_136855	4.16901	-0.811917	1.26668	0.260394	0.58437	1
CG12963	NM_166101	4.16901	-0.811917	1.26668	0.260394	0.58437	1
asRNA:CR43898	NR_073879	4.16901	-0.811917	1.26668	0.260394	0.58437	1
CG15614	NM_137324	4.16901	-0.811917	1.26668	0.260394	0.58437	1
BomBc1	NM_137474	4.16901	-0.811917	1.26668	0.260394	0.58437	1
rib	NM_001274155	4.16901	-0.811917	1.26668	0.260394	0.58437	1
Treh	NM_080082	4.16901	-0.811917	1.26668	0.260394	0.58437	1
Or59c	NM_079099	4.16901	-0.811917	1.26668	0.260394	0.58437	1
Snap25	NM_001043177	4.16901	-0.811917	1.26668	0.260394	0.58437	1
Glut1	NM_001274303	4.16901	-0.811917	1.26668	0.260394	0.58437	1
asRNA:CR45807	NR_133145	4.16901	-0.811917	1.26668	0.260394	0.58437	1
Mul1	NM_001316436	4.16901	-0.811917	1.26668	0.260394	0.58437	1
CG10853	NM_139585	4.16901	-0.811917	1.26668	0.260394	0.58437	1
CG14985	NM_001259679	4.16901	-0.811917	1.26668	0.260394	0.58437	1
CG8006	NM_139934	4.16901	-0.811917	1.26668	0.260394	0.58437	1
dpr6	NM_144182	4.16901	-0.811917	1.26668	0.260394	0.58437	1
CG10725	NM_140390	4.16901	-0.811917	1.26668	0.260394	0.58437	1
CG10222	NM_001300131	4.16901	-0.811917	1.26668	0.260394	0.58437	1
mir-289	NR_048273	4.16901	-0.811917	1.26668	0.260394	0.58437	1
CG33796	NM_001031957	4.16901	-0.811917	1.26668	0.260394	0.58437	1
CG7402	NM_140766	4.16901	-0.811917	1.26668	0.260394	0.58437	1
lncRNA:CR44669	NR_124979	4.16901	-0.811917	1.26668	0.260394	0.58437	1
CG32195	NM_001275078	4.16901	-0.811917	1.26668	0.260394	0.58437	1
CG34258	NM_001104178	4.16901	-0.811917	1.26668	0.260394	0.58437	1
CG13250	NM_140988	4.16901	-0.811917	1.26668	0.260394	0.58437	1
CG12971	NM_001275225	4.16901	-0.811917	1.26668	0.260394	0.58437	1
CG32445	NM_168931	4.16901	-0.811917	1.26668	0.260394	0.58437	1
lncRNA:CR45971	NR_133301	4.16901	-0.811917	1.26668	0.260394	0.58437	1
CG11438	NM_001300216	4.16901	-0.811917	1.26668	0.260394	0.58437	1
lncRNA:CR46122	NR_133318	4.16901	-0.811917	1.26668	0.260394	0.58437	1
PEK	NM_001275354	4.16901	-0.811917	1.26668	0.260394	0.58437	1
lncRNA:CR45906	NR_133349	4.16901	-0.811917	1.26668	0.260394	0.58437	1
alpha-Est1	NM_079545	4.16901	-0.811917	1.26668	0.260394	0.58437	1
lncRNA:CR46017	NR_133385	4.16901	-0.811917	1.26668	0.260394	0.58437	1
CG15922	NM_001275834	4.16901	-0.811917	1.26668	0.260394	0.58437	1
CG31198	NM_169966	4.16901	-0.811917	1.26668	0.260394	0.58437	1
WASp	NM_176578	4.16901	-0.811917	1.26668	0.260394	0.58437	1
Doa	NM_001043299	4.16901	-0.811917	1.26668	0.260394	0.58437	1
SP1029	NM_170406	4.16901	-0.811917	1.26668	0.260394	0.58437	1
mey	NM_143613	4.16901	-0.811917	1.26668	0.260394	0.58437	1
lncRNA:CR45274	NR_124598	4.16572	-0.813089	1.26578	0.260563	0.584087	1
eIF2Bdelta	NM_137946	4.16572	-0.813089	1.26578	0.260563	0.584087	1
CG33490	NM_206325	4.16572	-0.813089	1.26578	0.260563	0.584087	1
CG12589	NM_001300239	4.16572	-0.813089	1.26578	0.260563	0.584087	1
sta	NM_057402	4.16242	-0.814262	1.26488	0.260733	0.583804	1
CG33120	NM_176059	4.16242	-0.814262	1.26488	0.260733	0.583804	1
asRNA:CR44907	NR_124391	4.16242	-0.814262	1.26488	0.260733	0.583804	1
snoRNA:Me28S-A774b	NR_003867	4.16242	-0.814262	1.26488	0.260733	0.583804	1
CG6244	NM_206377	4.16242	-0.814262	1.26488	0.260733	0.583804	1
Ir76a	NM_168817	4.16242	-0.814262	1.26488	0.260733	0.583804	1
Incenp	NM_078924	4.15912	-0.815436	1.26397	0.260903	0.58352	1
Hr78	NM_001202222	4.15912	-0.815436	1.26397	0.260903	0.58352	1
lncRNA:CR46002	NR_133142	4.15912	-0.815436	1.26397	0.260903	0.58352	1
tut	NM_168261	4.15912	-0.815436	1.26397	0.260903	0.58352	1
CG43072	NM_001259925	4.15912	-0.815436	1.26397	0.260903	0.58352	1
lncRNA:CR44081	NR_073733	4.15675	-0.829675	1.26409	0.260881	0.583557	1
snoRNA:SC35-a	NR_047943	4.15581	-0.81661	1.26306	0.261074	0.583236	1
eEF1beta	NM_001299577	4.15581	-0.81661	1.26306	0.261074	0.583236	1
Tmc	NM_001259769	4.15581	-0.81661	1.26306	0.261074	0.583236	1
CG10311	NM_001300435	4.15581	-0.81661	1.26306	0.261074	0.583236	1
asRNA:CR45800	NR_133424	4.15581	-0.81661	1.26306	0.261074	0.583236	1
CG7309	NM_135624	4.1525	-0.817785	1.26216	0.261246	0.58295	1
Ptpmeg	NM_138187	4.1525	-0.817785	1.26216	0.261246	0.58295	1
form3	NM_001104057	4.1525	-0.817785	1.26216	0.261246	0.58295	1
Zasp67	NM_001274725	4.1525	-0.817785	1.26216	0.261246	0.58295	1
snoRNA:Edc3-a	NR_048291	4.1525	-0.817785	1.26216	0.261246	0.58295	1
GluProRS	NM_170103	4.1525	-0.817785	1.26216	0.261246	0.58295	1
eEF1gamma	NM_143743	4.1525	-0.817785	1.26216	0.261246	0.58295	1
lncRNA:CR45389	NR_124988	4.1512	0.728899	1.38764	0.238807	0.621953	1
snoRNA:Psi18S-525h	NR_003776	4.14917	-0.81896	1.26124	0.261418	0.582664	1
Dscam1	NM_001043021	4.14917	-0.81896	1.26124	0.261418	0.582664	1
snoRNA:Psi28S-3316b	NR_003812	4.14917	-0.81896	1.26124	0.261418	0.582664	1
Tnpo	NM_168161	4.14917	-0.81896	1.26124	0.261418	0.582664	1
snoRNA:Psi28S-2626	NR_003919	4.14917	-0.81896	1.26124	0.261418	0.582664	1
CG1909	NM_143671	4.14584	-0.820136	1.26033	0.261591	0.582377	1
mamo	NM_001258732	4.14584	-0.820136	1.26033	0.261591	0.582377	1
Kap3	NM_001103480	4.14584	-0.820136	1.26033	0.261591	0.582377	1
Cyp318a1	NM_167318	4.14584	-0.820136	1.26033	0.261591	0.582377	1
LIMK1	NM_001169263	4.14584	-0.820136	1.26033	0.261591	0.582377	1
asRNA:CR45623	NR_123886	4.14584	-0.820136	1.26033	0.261591	0.582377	1
lncRNA:CR45605	NR_123935	4.14584	-0.820136	1.26033	0.261591	0.582377	1
lncRNA:CR45608	NR_123942	4.14584	-0.820136	1.26033	0.261591	0.582377	1
lncRNA:CR45514	NR_123948	4.14584	-0.820136	1.26033	0.261591	0.582377	1
Abca3	NM_001272835	4.14584	-0.820136	1.26033	0.261591	0.582377	1
Gr22e	NM_164438	4.14584	-0.820136	1.26033	0.261591	0.582377	1
Hnf4	NM_164833	4.14584	-0.820136	1.26033	0.261591	0.582377	1
snoRNA:Psi18S-525i	NR_003778	4.14584	-0.820136	1.26033	0.261591	0.582377	1
snoRNA:Psi18S-640f	NR_003777	4.14584	-0.820136	1.26033	0.261591	0.582377	1
IKKepsilon	NM_136204	4.14584	-0.820136	1.26033	0.261591	0.582377	1
Dscam1	NM_001043036	4.14584	-0.820136	1.26033	0.261591	0.582377	1
hts	NM_001299683	4.14584	-0.820136	1.26033	0.261591	0.582377	1
Mob4	NM_001259222	4.14584	-0.820136	1.26033	0.261591	0.582377	1
Cyp4ad1	NM_136536	4.14584	-0.820136	1.26033	0.261591	0.582377	1
CG12963	NM_137204	4.14584	-0.820136	1.26033	0.261591	0.582377	1
lncRNA:CR44420	NR_124615	4.14584	-0.820136	1.26033	0.261591	0.582377	1
CG13427	NM_137642	4.14584	-0.820136	1.26033	0.261591	0.582377	1
CG43710	NM_001274176	4.14584	-0.820136	1.26033	0.261591	0.582377	1
Rgk3	NM_001103926	4.14584	-0.820136	1.26033	0.261591	0.582377	1
CG9205	NM_167851	4.14584	-0.820136	1.26033	0.261591	0.582377	1
CG34242	NM_001144468	4.14584	-0.820136	1.26033	0.261591	0.582377	1
lncRNA:CR44702	NR_124941	4.14584	-0.820136	1.26033	0.261591	0.582377	1
lncRNA:CR43870	NR_073943	4.14584	-0.820136	1.26033	0.261591	0.582377	1
CG3819	NM_001275098	4.14584	-0.820136	1.26033	0.261591	0.582377	1
fln	NM_079450	4.14584	-0.820136	1.26033	0.261591	0.582377	1
CG5199	NM_140970	4.14584	-0.820136	1.26033	0.261591	0.582377	1
Polr3E	NM_001170015	4.14584	-0.820136	1.26033	0.261591	0.582377	1
CG31097	NM_170214	4.14584	-0.820136	1.26033	0.261591	0.582377	1
asRNA:CR44019	NR_156771	4.14584	-0.820136	1.26033	0.261591	0.582377	1
CG14689	NM_141752	4.14584	-0.820136	1.26033	0.261591	0.582377	1
asRNA:CR45206	NR_125169	4.14584	-0.820136	1.26033	0.261591	0.582377	1
CG5478	NM_142256	4.14584	-0.820136	1.26033	0.261591	0.582377	1
CG14301	NM_142477	4.14584	-0.820136	1.26033	0.261591	0.582377	1
CG4390	NM_169887	4.14584	-0.820136	1.26033	0.261591	0.582377	1
cnc	NM_170059	4.14584	-0.820136	1.26033	0.261591	0.582377	1
CG11790	NM_170192	4.14584	-0.820136	1.26033	0.261591	0.582377	1
tbrd-3	NM_166592	4.08105	-0.855547	1.24305	0.264887	0.576939	1
CG14340	NM_134723	4.07888	2.25548	3.40836	0.0648697	1.18796	1
isoQC	NM_176373	4.07511	1.41093	1.84872	0.173936	0.759611	1
	NM_175999	4.07035	0.679984	1.32086	0.25044	0.601296	1
Uros2	NM_142232	4.06993	1.71915	2.26307	0.132495	0.877802	1
CG6424	NM_001169710	4.0697	0.679516	1.32028	0.250545	0.601115	1
asRNA:CR44046	NR_074066	4.06444	0.66449	1.30878	0.252619	0.597534	1
Mrtf	NM_001144407	4.06362	0.661947	1.30687	0.252965	0.596939	1
Plp	NM_001274935	4.06001	2.06421	2.93934	0.0864489	1.06324	1
U2af50	NM_001258780	4.05271	0.660005	1.30083	0.254065	0.595055	1
CG14502	NM_137467	4.02639	0.531837	1.23939	0.265591	0.575787	1
CG30428	NM_166709	4.00321	1.34828	1.73427	0.18787	0.726143	1
CG43149	NM_001259591	4.00168	-0.881691	1.2208	0.269205	0.569916	1
Mks1	NM_132576	3.99679	0.624699	1.2551	0.262584	0.580732	1
pico	NM_001201745	3.98698	0.605522	1.23974	0.265525	0.575895	1
asRNA:CR45164	NR_125054	3.98338	0.487403	1.20345	0.272636	0.564417	1
snoRNA:Psi28S-3385b	NR_003880	3.97692	1.32663	1.6951	0.192934	0.714592	1
CG13887	NM_001299962	3.97564	0.482038	1.19804	0.273716	0.5627	1
Ac78C	NM_001275208	3.97044	0.591746	1.22464	0.268455	0.571129	1
CG14634	NM_001042790	3.96053	-0.894865	1.20921	0.271491	0.566244	1
wapl	NM_166931	3.96053	-0.894865	1.20921	0.271491	0.566244	1
CG32772	NM_131968	3.96053	-0.894865	1.20921	0.271491	0.566244	1
CG4607	NM_132152	3.96053	-0.894865	1.20921	0.271491	0.566244	1
CG2059	NM_001201624	3.96053	-0.894865	1.20921	0.271491	0.566244	1
Tbh	NM_176711	3.96053	-0.894865	1.20921	0.271491	0.566244	1
mys	NM_001298068	3.96053	-0.894865	1.20921	0.271491	0.566244	1
Gr10b	NM_078566	3.96053	-0.894865	1.20921	0.271491	0.566244	1
CG1492	NM_001316624	3.96053	-0.894865	1.20921	0.271491	0.566244	1
CG8509	NM_132851	3.96053	-0.894865	1.20921	0.271491	0.566244	1
I-3	NM_167716	3.96053	-0.894865	1.20921	0.271491	0.566244	1
asRNA:CR44987	NR_123998	3.96053	-0.894865	1.20921	0.271491	0.566244	1
Ts	NM_058019	3.96053	-0.894865	1.20921	0.271491	0.566244	1
gudu	NM_135267	3.96053	-0.894865	1.20921	0.271491	0.566244	1
Mtpalpha	NM_164860	3.96053	-0.894865	1.20921	0.271491	0.566244	1
CYLD	NM_164911	3.96053	-0.894865	1.20921	0.271491	0.566244	1
lncRNA:CR44496	NR_124201	3.96053	-0.894865	1.20921	0.271491	0.566244	1
lncRNA:CR45349	NR_124276	3.96053	-0.894865	1.20921	0.271491	0.566244	1
CG31816	NM_165166	3.96053	-0.894865	1.20921	0.271491	0.566244	1
RPA2	NM_136233	3.96053	-0.894865	1.20921	0.271491	0.566244	1
lncRNA:CR45334	NR_144658	3.96053	-0.894865	1.20921	0.271491	0.566244	1
a	NM_079902	3.96053	-0.894865	1.20921	0.271491	0.566244	1
CG4781	NM_138107	3.96053	-0.894865	1.20921	0.271491	0.566244	1
lncRNA:CR44284	NR_124480	3.96053	-0.894865	1.20921	0.271491	0.566244	1
Jra	NM_165739	3.96053	-0.894865	1.20921	0.271491	0.566244	1
asRNA:CR45271	NR_124524	3.96053	-0.894865	1.20921	0.271491	0.566244	1
CG13337	NM_137051	3.96053	-0.894865	1.20921	0.271491	0.566244	1
Ih	NM_001259391	3.96053	-0.894865	1.20921	0.271491	0.566244	1
CG10151	NM_166067	3.96053	-0.894865	1.20921	0.271491	0.566244	1
GstS1	NM_166216	3.96053	-0.894865	1.20921	0.271491	0.566244	1
CheA56a	NM_001032267	3.96053	-0.894865	1.20921	0.271491	0.566244	1
CG34206	NM_001103938	3.96053	-0.894865	1.20921	0.271491	0.566244	1
CG45063	NM_001299799	3.96053	-0.894865	1.20921	0.271491	0.566244	1
CG12849	NM_138125	3.96053	-0.894865	1.20921	0.271491	0.566244	1
CG3760	NM_001259584	3.96053	-0.894865	1.20921	0.271491	0.566244	1
Fhos	NM_168294	3.96053	-0.894865	1.20921	0.271491	0.566244	1
Agpat3	NM_168661	3.96053	-0.894865	1.20921	0.271491	0.566244	1
robl62A	NM_138266	3.96053	-0.894865	1.20921	0.271491	0.566244	1
CG13707	NM_001259704	3.96053	-0.894865	1.20921	0.271491	0.566244	1
Rcc1	NM_079219	3.96053	-0.894865	1.20921	0.271491	0.566244	1
CG18417	NM_139862	3.96053	-0.894865	1.20921	0.271491	0.566244	1
CG43169	NM_001259757	3.96053	-0.894865	1.20921	0.271491	0.566244	1
	NM_001370034	3.96053	-0.894865	1.20921	0.271491	0.566244	1
CG5906	NM_140261	3.96053	-0.894865	1.20921	0.271491	0.566244	1
CG34244	NM_001274905	3.96053	-0.894865	1.20921	0.271491	0.566244	1
Ocho	NM_080514	3.96053	-0.894865	1.20921	0.271491	0.566244	1
lncRNA:CR44050	NR_073939	3.96053	-0.894865	1.20921	0.271491	0.566244	1
CG13049	NM_168657	3.96053	-0.894865	1.20921	0.271491	0.566244	1
CG13038	NM_144158	3.96053	-0.894865	1.20921	0.271491	0.566244	1
CG13043	NM_140611	3.96053	-0.894865	1.20921	0.271491	0.566244	1
CG6885	NM_140799	3.96053	-0.894865	1.20921	0.271491	0.566244	1
ms(3)76Ba	NM_140852	3.96053	-0.894865	1.20921	0.271491	0.566244	1
kug	NM_001031967	3.96053	-0.894865	1.20921	0.271491	0.566244	1
Sfp77F	NM_001300205	3.96053	-0.894865	1.20921	0.271491	0.566244	1
CG43895	NM_001275265	3.96053	-0.894865	1.20921	0.271491	0.566244	1
CG7140	NM_141119	3.96053	-0.894865	1.20921	0.271491	0.566244	1
Nep2	NM_001275331	3.96053	-0.894865	1.20921	0.271491	0.566244	1
mtd	NM_170642	3.96053	-0.894865	1.20921	0.271491	0.566244	1
Osi7	NM_141369	3.96053	-0.894865	1.20921	0.271491	0.566244	1
Tm1	NM_169640	3.96053	-0.894865	1.20921	0.271491	0.566244	1
rec	NM_169674	3.96053	-0.894865	1.20921	0.271491	0.566244	1
Dad	NM_169740	3.96053	-0.894865	1.20921	0.271491	0.566244	1
CG5246	NM_142346	3.96053	-0.894865	1.20921	0.271491	0.566244	1
CG14325	NM_142384	3.96053	-0.894865	1.20921	0.271491	0.566244	1
Obp93a	NM_142688	3.96053	-0.894865	1.20921	0.271491	0.566244	1
lncRNA:CR45644	NR_125227	3.96053	-0.894865	1.20921	0.271491	0.566244	1
CG6569	NM_169975	3.96053	-0.894865	1.20921	0.271491	0.566244	1
CG43091	NM_001260317	3.96053	-0.894865	1.20921	0.271491	0.566244	1
CG10300	NM_142917	3.96053	-0.894865	1.20921	0.271491	0.566244	1
Rpn9	NM_170088	3.96053	-0.894865	1.20921	0.271491	0.566244	1
CG13640	NM_143043	3.96053	-0.894865	1.20921	0.271491	0.566244	1
lncRNA:CR45039	NR_125263	3.96053	-0.894865	1.20921	0.271491	0.566244	1
asRNA:CR43476	NR_048501	3.96053	-0.894865	1.20921	0.271491	0.566244	1
Gr98b	NM_170334	3.96053	-0.894865	1.20921	0.271491	0.566244	1
lncRNA:CR46106	NR_133477	3.96053	-0.894865	1.20921	0.271491	0.566244	1
spn-A	NM_170463	3.96053	-0.894865	1.20921	0.271491	0.566244	1
lncRNA:CR46115	NR_133489	3.96053	-0.894865	1.20921	0.271491	0.566244	1
Galphao	NM_176125	3.95961	1.30929	1.66725	0.19663	0.70635	1
Adar	NM_001258542	3.95675	-0.896095	1.20815	0.271702	0.565907	1
CG3216	NM_166415	3.95675	-0.896095	1.20815	0.271702	0.565907	1
Dscam2	NM_001169896	3.95675	-0.896095	1.20815	0.271702	0.565907	1
meru	NM_168635	3.95675	-0.896095	1.20815	0.271702	0.565907	1
Gel	NM_206426	3.95675	-0.896095	1.20815	0.271702	0.565907	1
lncRNA:CR46233	NR_133463	3.95675	-0.896095	1.20815	0.271702	0.565907	1
Actn	NM_001272237	3.95297	-0.897325	1.20708	0.271914	0.565568	1
Hers	NM_001258845	3.95297	-0.897325	1.20708	0.271914	0.565568	1
PAN3	NM_167982	3.95297	-0.897325	1.20708	0.271914	0.565568	1
park	NM_168885	3.95297	-0.897325	1.20708	0.271914	0.565568	1
beat-IV	NM_142899	3.95297	-0.897325	1.20708	0.271914	0.565568	1
stac	NM_001276018	3.95297	-0.897325	1.20708	0.271914	0.565568	1
CG42866	NM_001201924	3.95181	0.591528	1.21649	0.270052	0.568552	1
CG17078	NM_001272883	3.94919	-0.898556	1.20601	0.272127	0.565229	1
CG10734	NM_137246	3.94919	-0.898556	1.20601	0.272127	0.565229	1
asRNA:CR45827	NR_133158	3.94919	-0.898556	1.20601	0.272127	0.565229	1
Yif1	NM_143241	3.94919	-0.898556	1.20601	0.272127	0.565229	1
CG14464	NM_001299208	3.94847	1.15746	1.54414	0.214006	0.669575	1
snoRNA:684	NR_002476	3.94539	-0.899788	1.20493	0.27234	0.564888	1
lncRNA:CR45240	NR_124949	3.94539	-0.899788	1.20493	0.27234	0.564888	1
Mps1	NM_001275748	3.94539	-0.899788	1.20493	0.27234	0.564888	1
LamC	NM_001274045	3.9443	-0.91461	1.20494	0.272338	0.564891	1
CG15185	NM_141403	3.9443	-0.91461	1.20494	0.272338	0.564891	1
Dscam1	NM_001259240	3.94158	-0.901021	1.20387	0.272552	0.56455	1
CG13229	NM_136793	3.94158	-0.901021	1.20387	0.272552	0.56455	1
Eaf	NM_165519	3.94158	-0.901021	1.20387	0.272552	0.56455	1
lncRNA:CR44300	NR_124507	3.94158	-0.901021	1.20387	0.272552	0.56455	1
wntD	NM_142015	3.94158	-0.901021	1.20387	0.272552	0.56455	1
asRNA:CR44238	NR_074026	3.94158	-0.901021	1.20387	0.272552	0.56455	1
Smr	NM_080536	3.93777	-0.902254	1.2028	0.272765	0.564211	1
CoRest	NM_001258824	3.93777	-0.902254	1.2028	0.272765	0.564211	1
Ptp4E	NM_001169199	3.93777	-0.902254	1.2028	0.272765	0.564211	1
IP3K2	NM_001298272	3.93777	-0.902254	1.2028	0.272765	0.564211	1
aop	NM_001272980	3.93777	-0.902254	1.2028	0.272765	0.564211	1
lncRNA:CR44579	NR_124107	3.93777	-0.902254	1.2028	0.272765	0.564211	1
Glyat	NM_001038794	3.93777	-0.902254	1.2028	0.272765	0.564211	1
	NM_176000	3.93777	-0.902254	1.2028	0.272765	0.564211	1
	NM_001382121	3.93777	-0.902254	1.2028	0.272765	0.564211	1
lncRNA:CR44395	NR_124323	3.93777	-0.902254	1.2028	0.272765	0.564211	1
lncRNA:CR46209	NR_133090	3.93777	-0.902254	1.2028	0.272765	0.564211	1
Letm1	NM_166675	3.93777	-0.902254	1.2028	0.272765	0.564211	1
Spn42Dc	NM_001259225	3.93777	-0.902254	1.2028	0.272765	0.564211	1
mir-4980	NR_048058	3.93777	-0.902254	1.2028	0.272765	0.564211	1
PAN2	NM_136583	3.93777	-0.902254	1.2028	0.272765	0.564211	1
Sfp51E	NM_001169686	3.93777	-0.902254	1.2028	0.272765	0.564211	1
CG12963	NM_001103860	3.93777	-0.902254	1.2028	0.272765	0.564211	1
CG8303	NM_137297	3.93777	-0.902254	1.2028	0.272765	0.564211	1
CG43788	NM_001274107	3.93777	-0.902254	1.2028	0.272765	0.564211	1
CG34199	NM_001103910	3.93777	-0.902254	1.2028	0.272765	0.564211	1
CG30395	NM_166486	3.93777	-0.902254	1.2028	0.272765	0.564211	1
lncRNA:CR44763	NR_124704	3.93777	-0.902254	1.2028	0.272765	0.564211	1
CG14457	NM_141144	3.93777	-0.902254	1.2028	0.272765	0.564211	1
lncRNA:CR45402	NR_124737	3.93777	-0.902254	1.2028	0.272765	0.564211	1
E(bx)	NM_001274258	3.93777	-0.902254	1.2028	0.272765	0.564211	1
CG33233	NM_206257	3.93777	-0.902254	1.2028	0.272765	0.564211	1
upSET	NM_001274890	3.93777	-0.902254	1.2028	0.272765	0.564211	1
FucTA	NM_001274943	3.93777	-0.902254	1.2028	0.272765	0.564211	1
CG34251	NM_001169990	3.93777	-0.902254	1.2028	0.272765	0.564211	1
MESR6	NM_001275104	3.93777	-0.902254	1.2028	0.272765	0.564211	1
CG12984	NM_001300208	3.93777	-0.902254	1.2028	0.272765	0.564211	1
siz	NM_001043153	3.93777	-0.902254	1.2028	0.272765	0.564211	1
lncRNA:CR45972	NR_133302	3.93777	-0.902254	1.2028	0.272765	0.564211	1
asRNA:CR46255	NR_133320	3.93777	-0.902254	1.2028	0.272765	0.564211	1
lncRNA:CR45915	NR_133338	3.93777	-0.902254	1.2028	0.272765	0.564211	1
CAHbeta	NM_001300313	3.93777	-0.902254	1.2028	0.272765	0.564211	1
lncRNA:CR44942	NR_125150	3.93777	-0.902254	1.2028	0.272765	0.564211	1
	NM_001382016	3.93777	-0.902254	1.2028	0.272765	0.564211	1
CG44215	NM_001347772	3.93777	-0.902254	1.2028	0.272765	0.564211	1
CG13627	NM_170166	3.93777	-0.902254	1.2028	0.272765	0.564211	1
CG14354	NM_143176	3.93777	-0.902254	1.2028	0.272765	0.564211	1
snoRNA:Psi28S-3305a	NR_003907	3.93777	-0.902254	1.2028	0.272765	0.564211	1
CG7567	NM_143442	3.93777	-0.902254	1.2028	0.272765	0.564211	1
asRNA:CR46082	NR_133484	3.93777	-0.902254	1.2028	0.272765	0.564211	1
5-HT2A	NM_079499	3.93329	0.570189	1.1969	0.273944	0.562339	1
Klc	NM_001274852	3.92731	0.572714	1.1953	0.274266	0.561828	1
PPP4R2r	NM_080344	3.91526	1.1304	1.50327	0.220172	0.657238	1
lncRNA:CR45527	NR_123929	3.90815	2.10424	2.84441	0.0916955	1.03765	1
CG43060	NM_001260050	3.90119	-0.928145	1.19271	0.274786	0.561005	1
Ttc7	NM_143806	3.89614	0.435641	1.14669	0.284245	0.546307	1
CG14356	NM_142082	3.89153	2.34247	3.40549	0.0649826	1.1872	1
CG34208	NM_001103943	3.86827	0.530072	1.15441	0.28263	0.548782	1
CG9377	NM_135796	3.81146	-0.955432	1.16711	0.279998	0.552844	1
Ilp8	NM_140692	3.79852	0.365244	1.07932	0.298851	0.524545	1
CG42748	NM_001103719	3.79315	1.65144	1.92259	0.165575	0.781007	1
CG42867	NM_001202054	3.78131	0.46694	1.09455	0.295468	0.529489	1
Acer	NM_001273329	3.77463	0.449705	1.08544	0.297487	0.526532	1
lncRNA:CR44208	NR_073866	3.76474	-0.969184	1.15372	0.282775	0.54856	1
tej	NM_137106	3.76068	1.6249	1.86389	0.17218	0.764018	1
pzg	NM_141040	3.75378	2.87689	4.96694	0.0258384	1.58773	1
CG33494	NM_001276029	3.74013	0.308276	1.03342	0.309359	0.509537	1
CG42857	NM_001202277	3.73961	0.428894	1.06352	0.302415	0.519397	1
Mst77F	NM_079464	3.73426	2.05312	2.56686	0.109127	0.962068	1
cyr	NM_132214	3.7167	-0.983009	1.13992	0.285672	0.544132	1
ph-d	NM_080055	3.7167	-0.983009	1.13992	0.285672	0.544132	1
CG17776	NM_001297878	3.7167	-0.983009	1.13992	0.285672	0.544132	1
tyf	NM_001258589	3.7167	-0.983009	1.13992	0.285672	0.544132	1
CG15576	NM_131928	3.7167	-0.983009	1.13992	0.285672	0.544132	1
rux	NM_001258611	3.7167	-0.983009	1.13992	0.285672	0.544132	1
ND-B16.6	NM_001316630	3.7167	-0.983009	1.13992	0.285672	0.544132	1
CG32719	NM_167128	3.7167	-0.983009	1.13992	0.285672	0.544132	1
spirit	NM_132264	3.7167	-0.983009	1.13992	0.285672	0.544132	1
CG44532	NM_001298109	3.7167	-0.983009	1.13992	0.285672	0.544132	1
Idgf4	NM_001298139	3.7167	-0.983009	1.13992	0.285672	0.544132	1
sofe	NM_001298163	3.7167	-0.983009	1.13992	0.285672	0.544132	1
Karl	NM_001298208	3.7167	-0.983009	1.13992	0.285672	0.544132	1
lncRNA:CR45619	NR_123876	3.7167	-0.983009	1.13992	0.285672	0.544132	1
sicily	NM_001298213	3.7167	-0.983009	1.13992	0.285672	0.544132	1
HDAC4	NM_167356	3.7167	-0.983009	1.13992	0.285672	0.544132	1
lncRNA:CR44663	NR_123912	3.7167	-0.983009	1.13992	0.285672	0.544132	1
Chc	NM_206728	3.7167	-0.983009	1.13992	0.285672	0.544132	1
CG8945	NM_132962	3.7167	-0.983009	1.13992	0.285672	0.544132	1
chas	NM_001298453	3.7167	-0.983009	1.13992	0.285672	0.544132	1
nAChRalpha7	NM_001298507	3.7167	-0.983009	1.13992	0.285672	0.544132	1
GCS2alpha	NM_167758	3.7167	-0.983009	1.13992	0.285672	0.544132	1
lectin-21Ca	NM_144385	3.7167	-0.983009	1.13992	0.285672	0.544132	1
CG33673	NM_001032047	3.7167	-0.983009	1.13992	0.285672	0.544132	1
CG33282	NM_001103597	3.7167	-0.983009	1.13992	0.285672	0.544132	1
sob	NM_057534	3.7167	-0.983009	1.13992	0.285672	0.544132	1
asRNA:CR43926	NR_073729	3.7167	-0.983009	1.13992	0.285672	0.544132	1
CG9497	NM_001273201	3.7167	-0.983009	1.13992	0.285672	0.544132	1
Caper	NM_001298772	3.7167	-0.983009	1.13992	0.285672	0.544132	1
CG4502	NM_135259	3.7167	-0.983009	1.13992	0.285672	0.544132	1
lncRNA:CR44825	NR_124138	3.7167	-0.983009	1.13992	0.285672	0.544132	1
CG32982	NM_176002	3.7167	-0.983009	1.13992	0.285672	0.544132	1
lncRNA:CR44874	NR_124170	3.7167	-0.983009	1.13992	0.285672	0.544132	1
CG43850	NM_001298971	3.7167	-0.983009	1.13992	0.285672	0.544132	1
CG16852	NM_135817	3.7167	-0.983009	1.13992	0.285672	0.544132	1
lncRNA:CR45352	NR_124244	3.7167	-0.983009	1.13992	0.285672	0.544132	1
Gr36a	NM_165205	3.7167	-0.983009	1.13992	0.285672	0.544132	1
asRNA:CR45701	NR_124389	3.7167	-0.983009	1.13992	0.285672	0.544132	1
CG31673	NM_001299181	3.7167	-0.983009	1.13992	0.285672	0.544132	1
CG8671	NM_001273740	3.7167	-0.983009	1.13992	0.285672	0.544132	1
Dscam1	NM_001043014	3.7167	-0.983009	1.13992	0.285672	0.544132	1
ced-6	NM_165675	3.7167	-0.983009	1.13992	0.285672	0.544132	1
lncRNA:CR44316	NR_124525	3.7167	-0.983009	1.13992	0.285672	0.544132	1
scaf	NM_165441	3.7167	-0.983009	1.13992	0.285672	0.544132	1
Epac	NM_165490	3.7167	-0.983009	1.13992	0.285672	0.544132	1
CG12769	NM_001299252	3.7167	-0.983009	1.13992	0.285672	0.544132	1
Tom7	NM_001299291	3.7167	-0.983009	1.13992	0.285672	0.544132	1
asRNA:CR46453	NR_167842	3.7167	-0.983009	1.13992	0.285672	0.544132	1
lncRNA:CR46322	NR_144681	3.7167	-0.983009	1.13992	0.285672	0.544132	1
thetaTry	NM_078969	3.7167	-0.983009	1.13992	0.285672	0.544132	1
zetaTry	NM_078967	3.7167	-0.983009	1.13992	0.285672	0.544132	1
CG43192	NM_001259370	3.7167	-0.983009	1.13992	0.285672	0.544132	1
lncRNA:CR45032	NR_124546	3.7167	-0.983009	1.13992	0.285672	0.544132	1
Obp50d	NM_166053	3.7167	-0.983009	1.13992	0.285672	0.544132	1
lncRNA:CR44463	NR_124557	3.7167	-0.983009	1.13992	0.285672	0.544132	1
CG30458	NM_166220	3.7167	-0.983009	1.13992	0.285672	0.544132	1
snoRNA:U31:54Eb	NR_001765	3.7167	-0.983009	1.13992	0.285672	0.544132	1
HnRNP-K	NM_001274173	3.7167	-0.983009	1.13992	0.285672	0.544132	1
lncRNA:CR44757	NR_124695	3.7167	-0.983009	1.13992	0.285672	0.544132	1
lncRNA:CR43422	NR_048188	3.7167	-0.983009	1.13992	0.285672	0.544132	1
CG3085	NM_001274220	3.7167	-0.983009	1.13992	0.285672	0.544132	1
CG30177	NM_166624	3.7167	-0.983009	1.13992	0.285672	0.544132	1
CG3640	NM_138106	3.7167	-0.983009	1.13992	0.285672	0.544132	1
Fcp1	NM_001299917	3.7167	-0.983009	1.13992	0.285672	0.544132	1
snoRNA:Psi18S-110	NR_003846	3.7167	-0.983009	1.13992	0.285672	0.544132	1
CG13924	NM_139415	3.7167	-0.983009	1.13992	0.285672	0.544132	1
promL	NM_001274422	3.7167	-0.983009	1.13992	0.285672	0.544132	1
lncRNA:CR45820	NR_133166	3.7167	-0.983009	1.13992	0.285672	0.544132	1
CG13288	NM_001104052	3.7167	-0.983009	1.13992	0.285672	0.544132	1
lncRNA:CR45420	NR_124811	3.7167	-0.983009	1.13992	0.285672	0.544132	1
Pdp1	NM_168239	3.7167	-0.983009	1.13992	0.285672	0.544132	1
Unr	NM_001259740	3.7167	-0.983009	1.13992	0.285672	0.544132	1
snoRNA:U49:66Db	NR_001955	3.7167	-0.983009	1.13992	0.285672	0.544132	1
Argk	NM_001104086	3.7167	-0.983009	1.13992	0.285672	0.544132	1
CG11658	NM_206339	3.7167	-0.983009	1.13992	0.285672	0.544132	1
lncRNA:CR43612	NR_048270	3.7167	-0.983009	1.13992	0.285672	0.544132	1
CG43120	NM_001259825	3.7167	-0.983009	1.13992	0.285672	0.544132	1
comm3	NM_001300143	3.7167	-0.983009	1.13992	0.285672	0.544132	1
Vps60	NM_001275065	3.7167	-0.983009	1.13992	0.285672	0.544132	1
snoRNA:Me28S-A30	NR_003872	3.7167	-0.983009	1.13992	0.285672	0.544132	1
CG42393	NM_001144495	3.7167	-0.983009	1.13992	0.285672	0.544132	1
Capr	NM_001300178	3.7167	-0.983009	1.13992	0.285672	0.544132	1
asRNA:CR45912	NR_133273	3.7167	-0.983009	1.13992	0.285672	0.544132	1
Dysb	NM_140807	3.7167	-0.983009	1.13992	0.285672	0.544132	1
lush	NM_001169997	3.7167	-0.983009	1.13992	0.285672	0.544132	1
btsz	NM_001104324	3.7167	-0.983009	1.13992	0.285672	0.544132	1
smash	NM_001259983	3.7167	-0.983009	1.13992	0.285672	0.544132	1
lncRNA:CR45585	NR_125071	3.7167	-0.983009	1.13992	0.285672	0.544132	1
CG14664	NM_001300241	3.7167	-0.983009	1.13992	0.285672	0.544132	1
snoRNA:Psi28S-2442a	NR_003886	3.7167	-0.983009	1.13992	0.285672	0.544132	1
CG15594	NM_169132	3.7167	-0.983009	1.13992	0.285672	0.544132	1
sunz	NM_141416	3.7167	-0.983009	1.13992	0.285672	0.544132	1
alpha-Est2	NM_001275416	3.7167	-0.983009	1.13992	0.285672	0.544132	1
CG2678	NM_001260044	3.7167	-0.983009	1.13992	0.285672	0.544132	1
CG3999	NM_141732	3.7167	-0.983009	1.13992	0.285672	0.544132	1
Ugt304A1	NM_144362	3.7167	-0.983009	1.13992	0.285672	0.544132	1
PGRP-LB	NM_169392	3.7167	-0.983009	1.13992	0.285672	0.544132	1
CG18765	NM_001104280	3.7167	-0.983009	1.13992	0.285672	0.544132	1
Vha55	NM_169475	3.7167	-0.983009	1.13992	0.285672	0.544132	1
Art6	NM_142065	3.7167	-0.983009	1.13992	0.285672	0.544132	1
lncRNA:CR45635	NR_125167	3.7167	-0.983009	1.13992	0.285672	0.544132	1
CG5916	NM_001300428	3.7167	-0.983009	1.13992	0.285672	0.544132	1
Keap1	NM_142337	3.7167	-0.983009	1.13992	0.285672	0.544132	1
RhoGAP92B	NM_001300487	3.7167	-0.983009	1.13992	0.285672	0.544132	1
Octbeta1R	NM_001170219	3.7167	-0.983009	1.13992	0.285672	0.544132	1
lncRNA:CR43387	NR_048471	3.7167	-0.983009	1.13992	0.285672	0.544132	1
crb	NM_001275980	3.7167	-0.983009	1.13992	0.285672	0.544132	1
lncRNA:CR43631	NR_048490	3.7167	-0.983009	1.13992	0.285672	0.544132	1
Mlc1	NM_001300640	3.7167	-0.983009	1.13992	0.285672	0.544132	1
SP1029	NM_001276136	3.7167	-0.983009	1.13992	0.285672	0.544132	1
lncRNA:CR46110	NR_133481	3.7167	-0.983009	1.13992	0.285672	0.544132	1
sima	NM_001300670	3.7167	-0.983009	1.13992	0.285672	0.544132	1
lncRNA:CR46114	NR_133486	3.7167	-0.983009	1.13992	0.285672	0.544132	1
Cyp4c3	NM_079859	3.7167	-0.983009	1.13992	0.285672	0.544132	1
lncRNA:CR45918	NR_133108	3.71228	-0.984302	1.13864	0.285942	0.543722	1
snoRNA:Me28S-A992	NR_003800	3.71228	-0.984302	1.13864	0.285942	0.543722	1
CG8009	NM_140143	3.71228	-0.984302	1.13864	0.285942	0.543722	1
mRpL17	NM_001274267	3.70785	-0.985596	1.13737	0.286212	0.543312	1
Spt20	NM_001038916	3.70785	-0.985596	1.13737	0.286212	0.543312	1
Pka-C1	NM_205950	3.70341	-0.986891	1.13608	0.286484	0.5429	1
Cdk4	NM_166185	3.70341	-0.986891	1.13608	0.286484	0.5429	1
Fad2	NM_143709	3.70341	-0.986891	1.13608	0.286484	0.5429	1
asRNA:CR46251	NR_133230	3.70341	-0.986891	1.13608	0.286484	0.5429	1
Lk	NM_080154	3.70341	-0.986891	1.13608	0.286484	0.5429	1
Ttc26	NM_142229	3.7015	0.409272	1.04093	0.307607	0.512004	1
tutl	NM_001273090	3.69895	-0.988186	1.1348	0.286756	0.542487	1
Pex10	NM_139367	3.69895	-0.988186	1.1348	0.286756	0.542487	1
Miro	NM_001275966	3.69895	-0.988186	1.1348	0.286756	0.542487	1
CG31300	NM_143116	3.69895	-0.988186	1.1348	0.286756	0.542487	1
snoRNA:Psi18S-1377e	NR_003915	3.69895	-0.988186	1.1348	0.286756	0.542487	1
CG9925	NM_142067	3.69812	0.407042	1.03876	0.308113	0.51129	1
meigo	NM_001104383	3.69669	0.27985	1.00501	0.316104	0.50017	1
cac	NM_001272548	3.69448	-0.989482	1.13351	0.28703	0.542072	1
CG4822	NM_001038772	3.69448	-0.989482	1.13351	0.28703	0.542072	1
CG17648	NM_134776	3.69448	-0.989482	1.13351	0.28703	0.542072	1
CG3104	NM_001273040	3.69448	-0.989482	1.13351	0.28703	0.542072	1
lilli	NM_001144300	3.69448	-0.989482	1.13351	0.28703	0.542072	1
lncRNA:CR43704	NR_073712	3.69448	-0.989482	1.13351	0.28703	0.542072	1
Ugt307A1	NM_135253	3.69448	-0.989482	1.13351	0.28703	0.542072	1
gcm	NM_001273363	3.69448	-0.989482	1.13351	0.28703	0.542072	1
lncRNA:CR43410	NR_047950	3.69448	-0.989482	1.13351	0.28703	0.542072	1
lncRNA:CR43853	NR_073777	3.69448	-0.989482	1.13351	0.28703	0.542072	1
CG10839	NM_001299040	3.69448	-0.989482	1.13351	0.28703	0.542072	1
CG14402	NM_136222	3.69448	-0.989482	1.13351	0.28703	0.542072	1
lncRNA:CR46476	NR_167862	3.69448	-0.989482	1.13351	0.28703	0.542072	1
Fis1	NM_001144137	3.69448	-0.989482	1.13351	0.28703	0.542072	1
CG1946	NM_136475	3.69448	-0.989482	1.13351	0.28703	0.542072	1
Sting	NM_136681	3.69448	-0.989482	1.13351	0.28703	0.542072	1
snoRNA:lola-a	NR_048082	3.69448	-0.989482	1.13351	0.28703	0.542072	1
cag	NM_057859	3.69448	-0.989482	1.13351	0.28703	0.542072	1
CG30487	NM_165964	3.69448	-0.989482	1.13351	0.28703	0.542072	1
unc-104	NM_166192	3.69448	-0.989482	1.13351	0.28703	0.542072	1
CG5757	NM_137446	3.69448	-0.989482	1.13351	0.28703	0.542072	1
snoRNA:hts-a	NR_048146	3.69448	-0.989482	1.13351	0.28703	0.542072	1
CG3788	NM_137894	3.69448	-0.989482	1.13351	0.28703	0.542072	1
CG13564	NM_138038	3.69448	-0.989482	1.13351	0.28703	0.542072	1
wac	NM_001274265	3.69448	-0.989482	1.13351	0.28703	0.542072	1
CG34057	NM_001038891	3.69448	-0.989482	1.13351	0.28703	0.542072	1
Pcyt1	NM_167894	3.69448	-0.989482	1.13351	0.28703	0.542072	1
Oseg4	NM_139396	3.69448	-0.989482	1.13351	0.28703	0.542072	1
asRNA:CR45882	NR_133223	3.69448	-0.989482	1.13351	0.28703	0.542072	1
Hsc70-1	NM_168568	3.69448	-0.989482	1.13351	0.28703	0.542072	1
CG3764	NM_140686	3.69448	-0.989482	1.13351	0.28703	0.542072	1
lncRNA:CR43985	NR_073946	3.69448	-0.989482	1.13351	0.28703	0.542072	1
snoRNA:Me18S-U1356b	NR_003875	3.69448	-0.989482	1.13351	0.28703	0.542072	1
lncRNA:CR44156	NR_073980	3.69448	-0.989482	1.13351	0.28703	0.542072	1
snoRNA:Psi18S-1275	NR_002494	3.69448	-0.989482	1.13351	0.28703	0.542072	1
lncRNA:CR45576	NR_125131	3.69448	-0.989482	1.13351	0.28703	0.542072	1
lncRNA:CR44945	NR_125186	3.69448	-0.989482	1.13351	0.28703	0.542072	1
CG6432	NM_001300573	3.69448	-0.989482	1.13351	0.28703	0.542072	1
Ctl2	NM_170389	3.69448	-0.989482	1.13351	0.28703	0.542072	1
kay	NM_001300662	3.69448	-0.989482	1.13351	0.28703	0.542072	1
CG14764	NM_001259268	3.68837	1.08774	1.33086	0.248656	0.604401	1
alien	NM_001273347	3.67225	1.72328	1.94177	0.16348	0.786536	1
lncRNA:CR45232	NR_133126	3.66549	0.383204	1.01692	0.313254	0.504104	1
CG6834	NM_141847	3.65683	0.377528	1.01138	0.314575	0.502276	1
ple	NM_001300026	3.65204	0.365717	1.00507	0.316088	0.500192	1
CG33468	NM_206115	3.65173	3.69827	9.00629	0.00269116	2.57006	1
Or22b	NM_058077	3.64767	1.8796	2.13984	0.14352	0.843089	1
CG42851	NM_001202077	3.64321	-1.01934	1.12064	0.289784	0.537926	1
CG10183	NM_142903	3.64321	-1.01934	1.12064	0.289784	0.537926	1
B52	NM_176490	3.64052	0.358208	0.997735	0.317861	0.497762	1
ocm	NM_138050	3.63973	0.351662	0.994971	0.318533	0.496846	1
NLaz	NM_001298631	3.62277	2.18583	2.72124	0.099024	1.00426	1
CG43736	NM_001298042	3.60985	0.344472	0.98062	0.322048	0.492079	1
CLIP-190	NM_001273597	3.60831	1.03336	1.25967	0.261717	0.582169	1
zetaCOP	NM_168680	3.59536	0.322807	0.966861	0.325467	0.487494	1
asRNA:CR44512	NR_123959	3.59107	1.47766	1.58389	0.208204	0.681511	1
Rip11	NM_001169320	3.59072	-1.03365	1.10653	0.29284	0.533369	1
nito	NM_136495	3.56513	0.306629	0.949144	0.32994	0.481565	1
CG6443	NM_136005	3.56189	0.30131	0.945898	0.330768	0.480477	1
mRpS30	NM_001298368	3.55634	1.45088	1.53601	0.215215	0.667127	1
TwdlV	NM_141189	3.55089	1.89302	2.09088	0.148184	0.829198	1
asRNA:CR45870	NR_133191	3.54661	0.975669	1.19726	0.273873	0.562451	1
CG6607	NM_001274146	3.53989	0.184461	0.906994	0.340915	0.467353	1
morgue	NM_079712	3.53981	0.296925	0.935835	0.333353	0.477095	1
Antp	NM_206454	3.5368	0.821071	1.13174	0.287406	0.541504	1
puf	NM_206564	3.5366	-1.04804	1.09187	0.296059	0.528622	1
asRNA:CR45834	NR_133155	3.53618	1.43825	1.5116	0.218898	0.659757	1
lncRNA:CR44830	NR_124732	3.53032	0.972003	1.18758	0.27582	0.559374	1
ATPCL	NM_001298255	3.5253	0.281367	0.924422	0.336319	0.473249	1
sprt	NM_001299375	3.52464	0.270987	0.920212	0.337422	0.471827	1
spn-B	NM_143189	3.50913	0.274732	0.915802	0.338582	0.470336	1
pn	NM_176270	3.50046	0.269261	0.910463	0.339994	0.468529	1
CG11398	NM_001272193	3.48994	0.932179	1.14798	0.283976	0.546719	1
CG5958	NM_135275	3.48823	1.28327	1.35857	0.243788	0.612988	1
CG15642	NM_001298343	3.48076	-1.06251	1.07666	0.299449	0.523677	1
CycT	NM_001275064	3.47555	0.925395	1.13778	0.286124	0.543446	1
CG11453	NM_001299682	3.47323	0.139972	0.864638	0.352446	0.452907	1
snoRNA:Psi28S-1192d	NR_003736	3.46912	1.37914	1.41587	0.234086	0.630624	1
CG14391	NM_141968	3.45524	2.94914	4.6505	0.0310468	1.50798	1
per	NM_080317	3.43831	0.891369	1.10331	0.293544	0.532326	1
CG13366	NM_001297818	3.43517	0.898542	1.10547	0.293071	0.533027	1
Ir62a	NM_001299618	3.43191	0.223562	0.867654	0.351608	0.453942	1
Crk	NM_001258483	3.42312	-1.07706	1.06092	0.303008	0.518546	1
Syt7	NM_166749	3.42312	-1.07706	1.06092	0.303008	0.518546	1
	NM_001382171	3.42312	-1.07706	1.06092	0.303008	0.518546	1
CG32017	NM_001297794	3.42312	-1.07706	1.06092	0.303008	0.518546	1
SK	NM_001272322	3.42312	-1.07706	1.06092	0.303008	0.518546	1
mei-P26	NM_001272448	3.42312	-1.07706	1.06092	0.303008	0.518546	1
sdk	NM_001169159	3.42312	-1.07706	1.06092	0.303008	0.518546	1
CG11379	NM_001297837	3.42312	-1.07706	1.06092	0.303008	0.518546	1
Scgdelta	NM_001169170	3.42312	-1.07706	1.06092	0.303008	0.518546	1
Hr4	NM_001272228	3.42312	-1.07706	1.06092	0.303008	0.518546	1
CG3592	NM_130683	3.42312	-1.07706	1.06092	0.303008	0.518546	1
ec	NM_130722	3.42312	-1.07706	1.06092	0.303008	0.518546	1
AdamTS-B	NM_001169207	3.42312	-1.07706	1.06092	0.303008	0.518546	1
CG43736	NM_001298043	3.42312	-1.07706	1.06092	0.303008	0.518546	1
Sxl	NM_167115	3.42312	-1.07706	1.06092	0.303008	0.518546	1
lncRNA:CR45666	NR_123830	3.42312	-1.07706	1.06092	0.303008	0.518546	1
	NM_001382069	3.42312	-1.07706	1.06092	0.303008	0.518546	1
Obp8a	NM_167184	3.42312	-1.07706	1.06092	0.303008	0.518546	1
lncRNA:CR32690	NR_037725	3.42312	-1.07706	1.06092	0.303008	0.518546	1
CG12640	NM_132401	3.42312	-1.07706	1.06092	0.303008	0.518546	1
lncRNA:CR45708	NR_123894	3.42312	-1.07706	1.06092	0.303008	0.518546	1
CG32631	NM_167372	3.42312	-1.07706	1.06092	0.303008	0.518546	1
jub	NM_001201658	3.42312	-1.07706	1.06092	0.303008	0.518546	1
lncRNA:CR44655	NR_123901	3.42312	-1.07706	1.06092	0.303008	0.518546	1
betaNACtes6	NM_167406	3.42312	-1.07706	1.06092	0.303008	0.518546	1
CG43076	NM_001258749	3.42312	-1.07706	1.06092	0.303008	0.518546	1
CG4301	NM_132897	3.42312	-1.07706	1.06092	0.303008	0.518546	1
snoRNA:Psi28S-1135d	NR_003745	3.42312	-1.07706	1.06092	0.303008	0.518546	1
RpS5a	NM_001298433	3.42312	-1.07706	1.06092	0.303008	0.518546	1
TTLL1A	NM_132969	3.42312	-1.07706	1.06092	0.303008	0.518546	1
CG6891	NM_001272760	3.42312	-1.07706	1.06092	0.303008	0.518546	1
CG14195	NM_001298501	3.42312	-1.07706	1.06092	0.303008	0.518546	1
mir-2499	NR_047842	3.42312	-1.07706	1.06092	0.303008	0.518546	1
CG34120	NM_001298584	3.42312	-1.07706	1.06092	0.303008	0.518546	1
tty	NM_001272840	3.42312	-1.07706	1.06092	0.303008	0.518546	1
Usp2	NM_167775	3.42312	-1.07706	1.06092	0.303008	0.518546	1
zyd	NM_001316629	3.42312	-1.07706	1.06092	0.303008	0.518546	1
NTPase	NM_164515	3.42312	-1.07706	1.06092	0.303008	0.518546	1
GABA-B-R3	NM_164387	3.42312	-1.07706	1.06092	0.303008	0.518546	1
CG33922	NM_001032046	3.42312	-1.07706	1.06092	0.303008	0.518546	1
lncRNA:CR42859	NR_073697	3.42312	-1.07706	1.06092	0.303008	0.518546	1
Tengl1	NM_164467	3.42312	-1.07706	1.06092	0.303008	0.518546	1
CG31689	NM_164494	3.42312	-1.07706	1.06092	0.303008	0.518546	1
CG3123	NM_134872	3.42312	-1.07706	1.06092	0.303008	0.518546	1
CG34176	NM_001103606	3.42312	-1.07706	1.06092	0.303008	0.518546	1
tutl	NM_164578	3.42312	-1.07706	1.06092	0.303008	0.518546	1
mxt	NM_164599	3.42312	-1.07706	1.06092	0.303008	0.518546	1
CG9171	NM_164660	3.42312	-1.07706	1.06092	0.303008	0.518546	1
chm	NM_001259001	3.42312	-1.07706	1.06092	0.303008	0.518546	1
CG7214	NM_135297	3.42312	-1.07706	1.06092	0.303008	0.518546	1
lncRNA:CR44121	NR_073742	3.42312	-1.07706	1.06092	0.303008	0.518546	1
PGAP5	NM_164798	3.42312	-1.07706	1.06092	0.303008	0.518546	1
lncRNA:CR43855	NR_073745	3.42312	-1.07706	1.06092	0.303008	0.518546	1
Hnf4	NM_001298829	3.42312	-1.07706	1.06092	0.303008	0.518546	1
Npc1a	NM_001201842	3.42312	-1.07706	1.06092	0.303008	0.518546	1
Cnot4	NM_001273413	3.42312	-1.07706	1.06092	0.303008	0.518546	1
lncRNA:CR46454	NR_167845	3.42312	-1.07706	1.06092	0.303008	0.518546	1
CG13078	NM_136145	3.42312	-1.07706	1.06092	0.303008	0.518546	1
snRNA:U5:38ABb	NR_001674	3.42312	-1.07706	1.06092	0.303008	0.518546	1
CG9316	NM_136207	3.42312	-1.07706	1.06092	0.303008	0.518546	1
nompB	NM_165385	3.42312	-1.07706	1.06092	0.303008	0.518546	1
CG31612	NM_001169571	3.42312	-1.07706	1.06092	0.303008	0.518546	1
lncRNA:CR44803	NR_124432	3.42312	-1.07706	1.06092	0.303008	0.518546	1
lncRNA:CR43765	NR_073822	3.42312	-1.07706	1.06092	0.303008	0.518546	1
Nplp1	NM_001043105	3.42312	-1.07706	1.06092	0.303008	0.518546	1
Zip42C.2	NM_136387	3.42312	-1.07706	1.06092	0.303008	0.518546	1
Corin	NM_136453	3.42312	-1.07706	1.06092	0.303008	0.518546	1
Rs1	NM_143713	3.42312	-1.07706	1.06092	0.303008	0.518546	1
CG12126	NM_136525	3.42312	-1.07706	1.06092	0.303008	0.518546	1
lncRNA:CR44279	NR_124471	3.42312	-1.07706	1.06092	0.303008	0.518546	1
dmpd	NM_001259306	3.42312	-1.07706	1.06092	0.303008	0.518546	1
CG13228	NM_136801	3.42312	-1.07706	1.06092	0.303008	0.518546	1
Sobp	NM_136859	3.42312	-1.07706	1.06092	0.303008	0.518546	1
CG43190	NM_001259341	3.42312	-1.07706	1.06092	0.303008	0.518546	1
lncRNA:CR44313	NR_124522	3.42312	-1.07706	1.06092	0.303008	0.518546	1
St4	NM_001299469	3.42312	-1.07706	1.06092	0.303008	0.518546	1
Fs	NM_144119	3.42312	-1.07706	1.06092	0.303008	0.518546	1
CG30471	NM_001274072	3.42312	-1.07706	1.06092	0.303008	0.518546	1
lncRNA:CR45994	NR_133125	3.42312	-1.07706	1.06092	0.303008	0.518546	1
CG43103	NM_001259456	3.42312	-1.07706	1.06092	0.303008	0.518546	1
CG18538	NM_137470	3.42312	-1.07706	1.06092	0.303008	0.518546	1
Topors	NM_001274154	3.42312	-1.07706	1.06092	0.303008	0.518546	1
Treh	NM_166423	3.42312	-1.07706	1.06092	0.303008	0.518546	1
CG15649	NM_001169749	3.42312	-1.07706	1.06092	0.303008	0.518546	1
snoRNA:Psi18S-841a	NR_002551	3.42312	-1.07706	1.06092	0.303008	0.518546	1
CG10339	NM_138037	3.42312	-1.07706	1.06092	0.303008	0.518546	1
Start1	NM_001299919	3.42312	-1.07706	1.06092	0.303008	0.518546	1
sls	NM_001259622	3.42312	-1.07706	1.06092	0.303008	0.518546	1
Svil	NM_206244	3.42312	-1.07706	1.06092	0.303008	0.518546	1
Agpat3	NM_001259864	3.42312	-1.07706	1.06092	0.303008	0.518546	1
tey	NM_001275131	3.42312	-1.07706	1.06092	0.303008	0.518546	1
snoRNA:Psi28S-3308	NR_003847	3.42312	-1.07706	1.06092	0.303008	0.518546	1
lncRNA:CR45810	NR_133148	3.42312	-1.07706	1.06092	0.303008	0.518546	1
trio	NM_167850	3.42312	-1.07706	1.06092	0.303008	0.518546	1
CG12104	NM_001274338	3.42312	-1.07706	1.06092	0.303008	0.518546	1
CG11815	NM_139428	3.42312	-1.07706	1.06092	0.303008	0.518546	1
snoRNA:Or-CD11a	NR_003856	3.42312	-1.07706	1.06092	0.303008	0.518546	1
CG12009	NM_001259669	3.42312	-1.07706	1.06092	0.303008	0.518546	1
DopEcR	NM_001014559	3.42312	-1.07706	1.06092	0.303008	0.518546	1
CG15876	NM_139668	3.42312	-1.07706	1.06092	0.303008	0.518546	1
snoRNA:Psi28S-1837b	NR_003860	3.42312	-1.07706	1.06092	0.303008	0.518546	1
CG9948	NM_001274563	3.42312	-1.07706	1.06092	0.303008	0.518546	1
Ank2	NM_139891	3.42312	-1.07706	1.06092	0.303008	0.518546	1
ERR	NM_139926	3.42312	-1.07706	1.06092	0.303008	0.518546	1
Atat	NM_170631	3.42312	-1.07706	1.06092	0.303008	0.518546	1
Ae2	NM_001274724	3.42312	-1.07706	1.06092	0.303008	0.518546	1
nudE	NM_001300088	3.42312	-1.07706	1.06092	0.303008	0.518546	1
CG14131	NM_140249	3.42312	-1.07706	1.06092	0.303008	0.518546	1
eyg	NM_001300118	3.42312	-1.07706	1.06092	0.303008	0.518546	1
lncRNA:CR45664	NR_124959	3.42312	-1.07706	1.06092	0.303008	0.518546	1
CG42718	NM_001202190	3.42312	-1.07706	1.06092	0.303008	0.518546	1
nxf2	NM_079387	3.42312	-1.07706	1.06092	0.303008	0.518546	1
Nedd4	NM_001275061	3.42312	-1.07706	1.06092	0.303008	0.518546	1
Bet1	NM_168789	3.42312	-1.07706	1.06092	0.303008	0.518546	1
Psn	NM_079460	3.42312	-1.07706	1.06092	0.303008	0.518546	1
ZnT77C	NM_140976	3.42312	-1.07706	1.06092	0.303008	0.518546	1
lncRNA:CR43967	NR_073974	3.42312	-1.07706	1.06092	0.303008	0.518546	1
CkIIalpha	NM_001300224	3.42312	-1.07706	1.06092	0.303008	0.518546	1
CG9804	NM_141215	3.42312	-1.07706	1.06092	0.303008	0.518546	1
plx	NM_169094	3.42312	-1.07706	1.06092	0.303008	0.518546	1
lncRNA:CR45905	NR_133344	3.42312	-1.07706	1.06092	0.303008	0.518546	1
Obp84a	NM_001104230	3.42312	-1.07706	1.06092	0.303008	0.518546	1
Srr	NM_169273	3.42312	-1.07706	1.06092	0.303008	0.518546	1
asRNA:CR44137	NR_073997	3.42312	-1.07706	1.06092	0.303008	0.518546	1
CG14708	NM_141825	3.42312	-1.07706	1.06092	0.303008	0.518546	1
CG6908	NM_141848	3.42312	-1.07706	1.06092	0.303008	0.518546	1
Kyat	NM_169438	3.42312	-1.07706	1.06092	0.303008	0.518546	1
Desat1	NM_169468	3.42312	-1.07706	1.06092	0.303008	0.518546	1
asRNA:CR17025	NR_048380	3.42312	-1.07706	1.06092	0.303008	0.518546	1
Droj2	NM_169520	3.42312	-1.07706	1.06092	0.303008	0.518546	1
lncRNA:CR45642	NR_125178	3.42312	-1.07706	1.06092	0.303008	0.518546	1
Fer2	NM_001300430	3.42312	-1.07706	1.06092	0.303008	0.518546	1
bor	NM_080257	3.42312	-1.07706	1.06092	0.303008	0.518546	1
CG5225	NM_142330	3.42312	-1.07706	1.06092	0.303008	0.518546	1
CG42822	NM_001202314	3.42312	-1.07706	1.06092	0.303008	0.518546	1
lncRNA:CR43372	NR_048450	3.42312	-1.07706	1.06092	0.303008	0.518546	1
CG33110	NM_176539	3.42312	-1.07706	1.06092	0.303008	0.518546	1
loco	NM_001260311	3.42312	-1.07706	1.06092	0.303008	0.518546	1
lncRNA:CR44092	NR_074057	3.42312	-1.07706	1.06092	0.303008	0.518546	1
twin	NM_170128	3.42312	-1.07706	1.06092	0.303008	0.518546	1
ms(3)K81	NM_143253	3.42312	-1.07706	1.06092	0.303008	0.518546	1
Inx3	NM_001300646	3.42312	-1.07706	1.06092	0.303008	0.518546	1
ppk30	NM_001276147	3.42312	-1.07706	1.06092	0.303008	0.518546	1
Anp	NM_001300676	3.42312	-1.07706	1.06092	0.303008	0.518546	1
lncRNA:CR46219	NR_133491	3.42312	-1.07706	1.06092	0.303008	0.518546	1
Ctr1C	NM_143580	3.42312	-1.07706	1.06092	0.303008	0.518546	1
CG1572	NM_001298198	3.41779	-1.07842	1.05946	0.30334	0.51807	1
IFT20	NM_165429	3.41779	-1.07842	1.05946	0.30334	0.51807	1
lncRNA:CR43685	NR_073989	3.41779	-1.07842	1.05946	0.30334	0.51807	1
CG4511	NM_001170114	3.41779	-1.07842	1.05946	0.30334	0.51807	1
CG15553	NM_143584	3.41779	-1.07842	1.05946	0.30334	0.51807	1
CG18870	NM_001299755	3.41695	1.96606	2.06783	0.150439	0.82264	1
CG11555	NM_001298615	3.41244	-1.07978	1.058	0.303674	0.517592	1
lncRNA:CR46210	NR_133069	3.41244	-1.07978	1.058	0.303674	0.517592	1
CG2246	NM_170509	3.41244	-1.07978	1.058	0.303674	0.517592	1
asRNA:CR45525	NR_123802	3.40708	-1.08115	1.05653	0.30401	0.517112	1
Usp14	NM_001273392	3.40708	-1.08115	1.05653	0.30401	0.517112	1
MFS12	NM_001259267	3.40708	-1.08115	1.05653	0.30401	0.517112	1
CG5853	NM_001298857	3.40255	1.48893	1.47637	0.224346	0.649082	1
VGAT	NR_124363	3.40219	0.0934042	0.81993	0.365203	0.437466	1
ppk8	NM_001144679	3.4017	-1.08252	1.05506	0.304347	0.516631	1
CG34408	NM_001298151	3.4017	-1.08252	1.05506	0.304347	0.516631	1
asRNA:CR45621	NR_123884	3.4017	-1.08252	1.05506	0.304347	0.516631	1
tth	NM_001298287	3.4017	-1.08252	1.05506	0.304347	0.516631	1
Ranbp16	NM_001201665	3.4017	-1.08252	1.05506	0.304347	0.516631	1
Tob	NM_001169301	3.4017	-1.08252	1.05506	0.304347	0.516631	1
mei-218	NM_001201728	3.4017	-1.08252	1.05506	0.304347	0.516631	1
GCS2alpha	NM_167757	3.4017	-1.08252	1.05506	0.304347	0.516631	1
mir-4972	NR_047881	3.4017	-1.08252	1.05506	0.304347	0.516631	1
CG15425	NM_134976	3.4017	-1.08252	1.05506	0.304347	0.516631	1
lncRNA:CR44610	NR_124129	3.4017	-1.08252	1.05506	0.304347	0.516631	1
ATPsynGL	NM_135298	3.4017	-1.08252	1.05506	0.304347	0.516631	1
lncRNA:CR46208	NR_133075	3.4017	-1.08252	1.05506	0.304347	0.516631	1
CG16956	NM_135810	3.4017	-1.08252	1.05506	0.304347	0.516631	1
CG33643	NM_001032087	3.4017	-1.08252	1.05506	0.304347	0.516631	1
ck	NM_001299021	3.4017	-1.08252	1.05506	0.304347	0.516631	1
Cul3	NM_165110	3.4017	-1.08252	1.05506	0.304347	0.516631	1
CG34168	NM_001103696	3.4017	-1.08252	1.05506	0.304347	0.516631	1
Sgt	NM_001259129	3.4017	-1.08252	1.05506	0.304347	0.516631	1
scaRNA:PsiU2-38.40.42	NR_048031	3.4017	-1.08252	1.05506	0.304347	0.516631	1
CG8671	NM_001273742	3.4017	-1.08252	1.05506	0.304347	0.516631	1
Cyp49a1	NM_165774	3.4017	-1.08252	1.05506	0.304347	0.516631	1
Sod3	NM_001316415	3.4017	-1.08252	1.05506	0.304347	0.516631	1
CG42287	NM_001144193	3.4017	-1.08252	1.05506	0.304347	0.516631	1
mir-1016	NR_048111	3.4017	-1.08252	1.05506	0.304347	0.516631	1
CG43101	NM_001259400	3.4017	-1.08252	1.05506	0.304347	0.516631	1
CG30095	NM_166143	3.4017	-1.08252	1.05506	0.304347	0.516631	1
CG13896	NM_138212	3.4017	-1.08252	1.05506	0.304347	0.516631	1
yellow-g	NM_079164	3.4017	-1.08252	1.05506	0.304347	0.516631	1
CG1246	NM_001202107	3.4017	-1.08252	1.05506	0.304347	0.516631	1
CG12016	NM_168022	3.4017	-1.08252	1.05506	0.304347	0.516631	1
CG32246	NM_168098	3.4017	-1.08252	1.05506	0.304347	0.516631	1
jv	NM_001259719	3.4017	-1.08252	1.05506	0.304347	0.516631	1
snoRNA:U49:66Da	NR_001954	3.4017	-1.08252	1.05506	0.304347	0.516631	1
Zasp66	NM_176306	3.4017	-1.08252	1.05506	0.304347	0.516631	1
lncRNA:CR45403	NR_124845	3.4017	-1.08252	1.05506	0.304347	0.516631	1
OXA1L	NM_140160	3.4017	-1.08252	1.05506	0.304347	0.516631	1
snoRNA:Or-ACA8	NR_163224	3.4017	-1.08252	1.05506	0.304347	0.516631	1
lncRNA:CR45746	NR_124898	3.4017	-1.08252	1.05506	0.304347	0.516631	1
CG32102	NM_168500	3.4017	-1.08252	1.05506	0.304347	0.516631	1
CG33795	NM_001031958	3.4017	-1.08252	1.05506	0.304347	0.516631	1
wnd	NM_176363	3.4017	-1.08252	1.05506	0.304347	0.516631	1
CG12984	NM_141019	3.4017	-1.08252	1.05506	0.304347	0.516631	1
chb	NM_168882	3.4017	-1.08252	1.05506	0.304347	0.516631	1
lncRNA:CR46227	NR_133310	3.4017	-1.08252	1.05506	0.304347	0.516631	1
plh	NM_141254	3.4017	-1.08252	1.05506	0.304347	0.516631	1
l(3)neo38	NM_001260130	3.4017	-1.08252	1.05506	0.304347	0.516631	1
CG3942	NM_141914	3.4017	-1.08252	1.05506	0.304347	0.516631	1
smp-30	NM_169602	3.4017	-1.08252	1.05506	0.304347	0.516631	1
Abd-B	NM_206498	3.4017	-1.08252	1.05506	0.304347	0.516631	1
mir-4969	NR_048457	3.4017	-1.08252	1.05506	0.304347	0.516631	1
tsl	NM_001275881	3.4017	-1.08252	1.05506	0.304347	0.516631	1
lncRNA:CR43440	NR_125283	3.4017	-1.08252	1.05506	0.304347	0.516631	1
janA	NM_176585	3.4017	-1.08252	1.05506	0.304347	0.516631	1
lncRNA:CR46115	NR_133488	3.4017	-1.08252	1.05506	0.304347	0.516631	1
eEF5	NM_001298470	3.38737	0.193092	0.839866	0.359437	0.444377	1
CG3348	NM_134683	3.38319	0.190535	0.837387	0.360147	0.44352	1
Cp190	NM_169632	3.38058	1.30973	1.30454	0.253389	0.596213	1
Obp46a	NM_136730	3.36868	0.847825	1.05001	0.305507	0.514979	1
CG8701	NM_136532	3.36336	1.29127	1.28083	0.257747	0.588807	1
gnu	NM_140469	3.34346	0.828396	1.02924	0.310341	0.508161	1
Ns1	NM_001316437	3.3363	0.146825	0.80402	0.369896	0.43192	1
CG2269	NM_001259304	3.33337	0.82114	1.02123	0.312229	0.505526	1
Frl	NM_140452	3.31457	0.129685	0.789857	0.374146	0.426959	1
NaCP60E	NM_001274245	3.29626	1.71038	1.61904	0.203229	0.692014	1
Tep3	NM_078783	3.29322	1.86035	1.79534	0.18028	0.744053	1
CG13926	NM_001300187	3.28273	0.114775	0.772952	0.379307	0.421009	1
lncRNA:CR45962	NR_133305	3.26874	2.07187	2.09954	0.147347	0.831659	1
CG1632	NM_132239	3.26237	-1.13207	1.01436	0.313862	0.503261	1
asRNA:CR44976	NR_124023	3.26237	-1.13207	1.01436	0.313862	0.503261	1
CG13131	NM_135493	3.26237	-1.13207	1.01436	0.313862	0.503261	1
mRpS18B	NM_078882	3.26237	-1.13207	1.01436	0.313862	0.503261	1
lncRNA:CR44640	NR_124652	3.26237	-1.13207	1.01436	0.313862	0.503261	1
CG14095	NM_140855	3.26237	-1.13207	1.01436	0.313862	0.503261	1
mRpL12	NM_001259914	3.25447	0.106564	0.759972	0.383339	0.416417	1
Wnt5	NM_137443	3.2538	-0.0109213	0.737135	0.390582	0.408287	1
lncRNA:CR44471	NR_123797	3.25168	1.86248	1.77537	0.182722	0.738208	1
CG1943	NM_169167	3.25103	1.1995	1.15402	0.282712	0.548655	1
csw	NM_057783	3.24834	2.45252	2.81683	0.0932833	1.0302	1
CG10907	NM_057967	3.23568	0.0828395	0.744169	0.388331	0.410798	1
lncRNA:CR45387	NR_124993	3.22847	1.35154	1.25188	0.263196	0.579721	1
TwdlF	NM_141186	3.22458	1.76458	1.61814	0.203354	0.691747	1
CG8089	NM_137170	3.21955	1.76076	1.60971	0.204536	0.68923	1
CG11180	NR_123839	3.20755	-0.0422076	0.714371	0.397998	0.400119	1
Dis3	NM_142989	3.2067	1.78697	1.62798	0.201986	0.69468	1
lncRNA:CR43605	NR_048086	3.19545	-1.14725	0.995272	0.31846	0.496946	1
stw	NM_165432	3.17986	1.48943	1.31488	0.251515	0.599435	1
Mmp2	NM_001259936	3.17897	0.0588479	0.7157	0.39756	0.400597	1
Mnt	NM_001169180	3.17069	1.48056	1.30165	0.253915	0.595311	1
CG17658	NM_138001	3.15546	0.965252	0.996888	0.318067	0.497481	1
CG13738	NM_140416	3.15203	1.12413	1.05435	0.30451	0.516399	1
[truncated: 32,452 more rows]

## Sheet: Panel H
Search Gene	Found FBGN	Found Gene	embryo 00-02hr	embryo 02-04hr	embryo 04-06hr	embryo 06-08hr	embryo 08-10hr	embryo 10-12hr	embryo 12-14hr	embryo 14-16hr	embryo 16-18hr	embryo 18-20hr	embryo 20-22hr	embryo 22-24hr	larva L1	larva L2	larva L3 12hr old	larva L3 puffstage 1-2	larva L3 puffstage 3-6	larva L3 puffstage 7-9	white prepupae new	white prepupae 12hr	white prepupae 24hr	pupae 2d postWPP	pupae 3d postWPP	pupae 4d postWPP	adult male 01day	adult male 05day	adult male 30day	adult female 01day	adult female 05day	adult female 30day
Act57B	FBgn0000044	Act57B	32	31	36	255	635	897	1675	6965	10709	12835	9960	9326	9272	9494	14855	7474	3650	1137	201	511	225	331	5183	6507	1423	849	1187	1820	250	328
AdipoR	FBgn0038984	AdipoR	48	37	65	72	72	96	85	63	61	51	32	38	32	38	39	33	48	56	64	60	49	66	54	48	99	104	90	58	66	61
AnxB9	FBgn0000083	AnxB9	67	75	47	56	75	170	211	309	194	260	351	324	198	252	184	186	184	152	121	120	89	240	148	192	109	107	116	90	70	79
AstA-R2	FBgn0039595	AstA-R2	0	0	0	0	0	0	0	1	3	8	15	14	15	6	3	5	11	17	11	8	6	2	2	3	4	5	5	3	1	1
Asx	FBgn0261823	Asx	23	13	17	20	17	10	17	12	11	10	7	7	8	4	4	4	9	11	12	13	16	13	9	9	11	16	18	11	15	15
BomBc3	FBgn0040582	CG5791	0	0	0	0	0	0	0	0	0	0	0	0	0	0	0	0	0	0	0	0	0	0	0	4	62	81	177	46	13	82
BomS6	FBgn0040733	CG15068	0	0	0	0	0	0	0	0	0	3	27	35	1	2	0	7	29	7	21	2	2	1	8	1	309	19	10	7	55	16
CG10348	FBgn0032707	CG10348	0	0	0	0	1	4	8	7	7	5	1	1	1	2	1	1	1	1	1	1	2	20	15	14	5	4	4	3	0	0
CG10513	FBgn0039311	CG10513	0	0	0	0	0	0	0	0	0	1	8	9	18	17	37	63	66	28	4	0	0	0	1	11	52	78	73	23	13	14
CG10514	FBgn0039312	CG10514	0	0	0	0	0	0	0	2	1	1	1	0	21	21	53	59	64	95	87	1	1	0	0	6	86	88	96	43	28	27
CG10910	FBgn0034289	CG10910	0	0	0	0	0	0	0	0	2	9	59	71	146	122	176	235	158	65	15	4	0	0	0	1	29	35	40	43	51	47
CG10936	FBgn0034253	CG10936	2	1	0	1	2	5	13	44	51	36	15	17	10	18	16	12	15	12	12	42	20	34	34	8	9	2	1	7	3	3
CG11529	FBgn0036264	CG11529	0	0	0	0	0	0	1	0	1	10	77	49	5	5	4	9	80	303	24	1	0	1	0	2	4	7	7	2	2	1
CG11841	FBgn0039628	CG11841	0	0	0	0	0	0	0	0	0	0	0	0	0	0	0	2	3	1	0	1	0	1	0	35	52	69	95	28	18	19
CG12347	FBgn0038558	CG12347	0	0	0	0	0	0	0	0	0	0	0	0	0	0	0	0	1	2	1	3	5	6	7	4	8	11	10	0	0	0
CG12547	FBgn0250830	CG12547	23	31	24	21	22	19	28	8	12	8	9	15	6	9	7	7	12	19	18	17	22	20	13	4	7	6	5	6	20	16
CG12581	FBgn0037213	CG12581	3	36	68	57	49	62	51	48	34	31	18	18	21	25	16	11	17	20	22	28	36	31	25	35	15	13	14	15	7	7
CG12880	FBgn0046258	CG12880	0	0	1	5	5	30	23	5	2	3	4	4	3	1	1	8	20	37	43	25	94	144	23	7	3	2	2	3	2	3
CG12947	FBgn0037753	CG12947	0	3	5	6	5	4	6	2	4	3	2	2	2	3	4	1	2	5	3	13	4	19	48	10	2	1	1	2	2	1
CG12995	FBgn0030826	CG12995	0	0	0	0	0	0	0	0	1	0	0	0	0	0	2	0	0	0	0	5	0	2	14	6	1	1	1	1	0	0
CG13022	FBgn0036679	CG13022	0	0	0	0	0	0	0	0	0	0	1	1	0	0	0	0	0	1	0	2	2	16	67	3	2	2	3	0	0	0
CG13038	FBgn0040795	CG13038	0	0	0	0	0	0	0	4	19	17	5	6	6	9	6	2	2	1	1	2	2	3	9	2	4	0	0	3	0	0
CG13056	FBgn0040794	CG13056	0	0	0	0	1	0	0	0	2	7	7	8	3	1	1	0	0	0	0	37	343	33	88	12	6	2	3	6	0	0
CG13059	FBgn0036607	CG13059	2	2	1	1	4	5	7	71	672	2029	512	385	88	33	331	4	1	0	0	21	3	5	17	7	1	0	1	1	0	0
CG13065	FBgn0036590	CG13065	0	0	0	0	0	0	1	0	0	0	1	0	0	0	0	0	0	0	0	11	88	68	2714	888	18	0	0	13	0	0
CG13203	FBgn0033628	CG13203	0	0	0	1	0	1	2	2	1	1	2	2	2	1	0	0	1	1	1	1	1	2	7	2	2	2	2	0	0	0
CG1360	FBgn0033195	CG1360	12	8	5	6	6	5	5	2	2	1	3	3	4	3	2	1	2	2	2	2	3	3	1	1	2	3	2	4	9	10
CG13676	FBgn0035844	CG13676	0	0	1	1	1	3	10	28	106	62	8	10	14	35	58	31	45	39	32	117	58	63	81	15	9	1	0	6	1	1
CG13748	FBgn0033355	CG13748	0	0	0	0	0	0	1	5	3	2	2	2	2	24	15	2	2	10	67	604	283	491	164	45	2	1	2	2	0	0
CG13841	FBgn0040588	CG13841	0	0	0	0	0	0	0	0	0	0	0	0	0	0	0	0	0	0	0	0	0	0	5	11	6	6	10	5	2	2
CG13917	FBgn0035237	CG13917	35	12	21	16	15	14	24	24	20	22	16	18	16	10	10	6	12	22	19	39	37	48	16	41	23	20	23	25	29	29
CG14275	FBgn0032022	CG14275	0	1	2	7	34	50	33	37	46	90	141	123	15	9	40	11	18	27	15	36	28	8	16	37	31	31	28	24	12	10
CG15021	FBgn0035544	CG15021	0	0	0	0	1	1	1	8	57	203	961	541	106	27	64	10	8	3	2	2	0	15	501	282	186	104	116	152	10	9
CG15024	FBgn0040699	CG15024	0	0	0	0	0	1	1	2	26	124	24	28	2	4	9	0	0	0	0	0	0	1	3	2	1	0	0	1	0	0
CG15044	FBgn0030928	CG15044	0	0	0	0	0	0	1	4	7	15	45	43	33	20	33	55	69	102	56	1	0	0	0	242	7	9	6	26	10	10
CG15528	FBgn0039742	CG15528	1	7	9	3	3	2	2	3	5	13	17	15	7	4	5	12	28	33	10	2	1	2	10	31	15	24	14	7	3	3
CG15546	FBgn0039807	CG15546	0	0	0	0	0	1	2	4	18	37	20	23	9	2	7	3	4	3	1	3	2	2	42	47	20	14	12	10	3	3
CG1561	FBgn0030317	CG1561	0	1	2	2	1	0	0	0	0	0	0	0	0	0	0	0	0	0	1	1	0	15	10	54	68	49	44	61	13	10
CG15649	FBgn0034563	CG15649	0	0	0	0	0	0	0	5	31	13	1	2	0	11	7	0	0	0	0	1	1	2	10	5	12	9	4	1	0	1
CG16700	FBgn0030816	CG16700	1	1	1	1	1	3	3	6	7	20	40	38	21	13	9	6	18	42	42	9	9	7	25	9	11	11	11	12	11	9
CG16713	FBgn0031560	CG16713	0	0	0	0	0	1	0	1	9	59	183	208	41	37	132	114	92	44	40	143	27	27	13	136	53	52	48	27	33	54
CG16762	FBgn0035343	CG16762	0	0	0	0	0	0	0	1	2	1	4	3	35	29	67	70	65	54	28	10	1	3	6	107	38	72	195	27	10	25
CG16786	FBgn0034974	CG16786	0	0	0	1	3	8	26	60	80	53	17	21	9	35	15	2	5	9	12	7	24	87	120	22	12	1	1	8	0	0
CG16820	FBgn0032495	CG16820	0	0	0	0	1	0	1	3	29	44	9	12	6	11	13	4	4	3	2	35	10	29	62	16	28	26	15	6	2	1
CG16852	FBgn0028942	CG16852	0	0	0	0	0	0	0	0	0	0	0	0	0	0	0	3	5	6	5	9	13	17	13	11	15	25	26	0	0	0
CG17108	FBgn0032285	CG17108	0	0	0	0	0	0	0	0	0	0	0	0	9	10	43	186	172	90	53	4	18	9	1	464	724	1437	1825	297	301	456
CG17147	FBgn0260393	CG17147	0	0	0	0	0	0	0	0	1	5	16	17	38	24	19	47	26	11	1	0	0	0	0	0	1	0	1	0	0	0
CG17279	FBgn0038850	CG17279	0	0	0	0	0	0	0	0	0	0	0	0	0	0	0	0	0	0	0	0	0	0	0	4	3	3	3	2	1	1
CG17744	FBgn0035730	CG17744	0	0	0	0	0	0	0	0	0	0	0	0	0	0	0	3	7	10	10	15	24	30	24	10	26	29	22	0	0	0
CG18507	FBgn0028527	CG18507	0	0	0	6	16	58	51	32	19	14	7	7	11	11	11	11	16	25	35	33	27	16	13	20	13	17	22	9	5	5
CG18662	FBgn0040963	CG18662	0	0	0	0	0	0	0	0	0	0	0	0	0	0	0	10	24	32	29	52	78	111	121	67	150	165	152	0	0	0
CG30069	FBgn0050069	CG30069	0	0	0	0	0	1	4	7	17	18	11	15	5	7	10	6	11	12	9	10	3	4	14	8	5	4	5	3	2	2
CG31097	FBgn0051097	CG31097	0	0	0	0	0	0	0	0	0	1	4	6	2	3	3	2	1	2	3	2	1	1	0	2	3	2	2	1	0	1
CG31272	FBgn0051272	CG31272	0	0	0	1	2	5	5	3	2	5	11	23	10	17	14	6	3	1	1	2	1	0	1	4	7	7	10	4	3	7
CG31650	FBgn0031673	CG31650	63	115	123	100	107	120	82	60	44	27	47	42	26	23	14	14	22	31	34	34	48	53	41	22	31	41	41	29	40	39
CG31871	FBgn0051871	CG31871	0	2	2	1	2	7	7	13	50	35	5	5	2	11	5	0	0	0	0	5	2	3	18	4	1	1	1	1	0	0
CG31883	FBgn0032122	CG31883	0	0	0	0	1	0	0	0	0	0	0	0	0	0	0	0	0	0	0	1	0	0	0	5	87	114	38	0	0	0
CG32006	FBgn0052006	CG32006	0	0	0	0	0	1	2	0	1	1	1	1	0	0	0	0	1	1	1	2	3	4	3	1	2	2	1	0	0	0
CG32036	FBgn0052036	CG32036	0	0	1	0	1	1	1	10	51	21	1	1	1	4	1	0	0	0	0	1	0	27	240	10	1	0	0	1	0	0
CG32228	FBgn0052228	CG32228	0	0	0	0	0	0	0	0	0	0	0	0	0	0	0	0	0	1	1	1	1	2	1	0	2	1	1	0	0	0
CG32302	FBgn0052302	CG32302	0	0	0	1	1	2	2	13	30	73	349	349	356	178	253	646	947	810	343	6	2	1	0	3	0	0	0	6	4	2
CG32523	FBgn0052523	CG32523	0	0	0	0	0	0	0	0	0	0	0	0	0	0	0	0	0	0	0	0	0	0	0	0	7	11	16	9	5	8
CG32572	FBgn0052572	CG32572	0	0	0	0	0	0	0	0	0	0	0	0	0	0	0	2	5	5	5	9	16	18	16	18	27	39	41	0	0	0
CG32650	FBgn0052650	CG32650	1	1	0	1	1	1	1	1	0	1	0	0	1	1	1	2	5	6	5	9	15	17	15	17	24	32	34	1	1	1
CG33474	FBgn0053474	CG33474	0	1	1	1	1	0	0	0	0	1	2	2	0	0	0	0	0	0	0	0	0	0	0	0	0	0	0	0	0	0
CG33946	FBgn0047000	CG33946	0	0	0	0	0	0	0	0	0	0	0	0	0	0	1	4	3	2	33	0	0	2	150	4	11	6	2	3	14	9
CG34034	FBgn0054034	CG34034	0	0	0	1	2	2	2	0	0	1	1	1	0	0	0	1	1	1	1	117	11	15	9	64	233	236	159	1	1	1
CG34217	FBgn0085246	CG34217	0	0	0	0	0	0	0	0	0	0	0	0	0	0	0	0	0	0	0	0	0	1	0	97	8	0	0	2	0	0
CG34247	FBgn0085276	CG34247	0	0	0	0	0	0	0	0	0	0	0	0	0	0	0	0	0	0	0	285	3380	180	15	12	1	0	0	0	0	0
CG34398	FBgn0085427	CG34398	0	0	0	1	1	3	6	13	16	17	14	12	8	9	9	5	11	14	19	23	29	45	10	22	16	14	15	10	3	3
CG34461	FBgn0250833	CG34461	0	0	0	0	1	1	1	22	173	126	3	4	0	5	7	0	0	1	0	7	0	237	4652	148	6	0	0	3	0	0
CG3513	FBgn0031559	CG3513	0	0	0	0	0	0	1	0	0	0	1	0	0	0	1	6	5	3	4	79	135	848	666	33	10	6	5	3	1	1
CG3635	FBgn0032981	CG3635	0	0	0	0	0	2	3	3	3	3	1	2	1	3	4	13	5	1	0	0	1	1	3	1	3	3	3	2	2	2
CG3880	FBgn0035057	CG3880	0	1	1	3	6	15	14	6	7	5	0	0	0	6	4	4	5	5	4	27	33	17	7	2	1	0	0	0	0	0
CG4000	FBgn0038820	CG4000	0	0	0	0	0	0	0	1	7	28	18	13	1	0	0	12	15	9	3	1	3	1	6	147	810	239	96	578	54	32
CG42323	FBgn0259223	CG42323	0	0	0	0	0	0	0	0	0	0	0	0	0	0	0	0	0	0	0	15	0	142	3407	873	4	0	0	4	0	0
CG43051	FBgn0262353	CR43051	1	1	1	2	6	14	41	27	59	51	38	60	10	13	7	26	33	64	96	60	17	27	20	7	11	7	6	8	14	10
CG4328	FBgn0036274	CG4328	0	0	0	0	1	3	4	4	4	5	4	4	3	1	0	0	1	1	1	2	2	1	1	1	1	1	1	0	0	0
CG43329	FBgn0263034	CG43329	0	0	0	0	0	0	0	0	0	0	0	0	0	0	0	0	2	2	2	4	6	8	11	8	17	19	19	0	0	0
CG43646	FBgn0263655	CG43646	0	0	0	0	0	0	1	0	0	1	1	1	0	0	0	0	0	0	0	0	0	0	0	0	0	1	0	0	0	0
CG43647	FBgn0263656	CG43647	0	0	0	0	0	0	0	0	0	0	0	1	0	0	0	0	0	0	1	1	1	1	1	0	1	1	0	0	0	0
CG43938	FBgn0264566	CG43938	0	0	0	0	0	0	0	0	0	0	0	0	0	0	0	0	0	0	0	0	0	0	0	0	2	3	2	0	0	0
CG4462	FBgn0038752	CG4462	0	0	0	0	1	1	1	2	3	5	10	10	10	6	10	10	10	8	7	15	3	2	7	13	16	16	12	11	5	4
CG4476	FBgn0035969	CG4476	85	2	1	1	1	1	1	1	0	0	0	1	2	0	1	2	3	2	1	1	2	1	3	1	1	2	2	26	70	65
CG46397	FBgn0286875	Data Not Found
CG4741	FBgn0035040	CG4741	0	0	0	0	0	0	0	1	1	1	10	9	22	16	11	21	27	26	17	3	7	4	2	4	6	8	6	5	2	2
CG5162	FBgn0030828	CG5162	0	0	0	1	1	0	0	0	0	11	137	97	40	1	25	17	7	4	6	41	1	2	0	126	198	387	299	32	32	25
CG5225	FBgn0038468	CG5225	0	0	0	0	0	0	0	0	0	0	0	0	6	200	39	1	2	1	0	0	0	1	3	1	0	0	0	1	0	0
CG5653	FBgn0035943	CG5653	0	0	0	0	0	0	0	0	0	0	0	0	0	0	0	1	3	5	5	10	16	19	67	10	10	16	16	0	0	0
CG5715	FBgn0039180	CG5715	0	0	0	0	0	0	0	0	0	0	0	0	1	20	16	1	0	0	0	0	0	0	1	5	0	0	0	0	0	0
CG5770	FBgn0034291	CG5770	0	0	0	0	0	0	0	2	10	25	39	43	54	49	44	351	425	394	221	1	0	0	0	0	2	3	9	9	5	6
CG5810	FBgn0038866	CG5810	0	0	0	0	0	0	0	0	0	4	12	22	3	1	9	3	1	0	0	5	0	0	0	0	0	0	0	0	0	0
CG5897	FBgn0036220	CG5897	0	0	0	0	0	0	0	1	3	4	3	4	3	1	1	2	2	2	1	0	0	0	0	0	1	1	3	1	1	1
CG5909	FBgn0039495	CG5909	0	0	0	0	0	0	0	0	0	0	1	1	2	0	0	0	0	0	0	11	3	3	1	7	9	9	10	6	3	2
CG5953	FBgn0032587	CG5953	12	8	2	3	4	6	7	10	9	17	19	20	3	2	3	2	8	13	14	16	6	5	2	43	3	3	5	10	11	11
CG5973	FBgn0031914	CG5973	0	1	1	9	21	25	50	35	75	89	18	29	4	8	23	16	15	12	10	139	25	14	14	16	32	30	20	16	22	18
CG6126	FBgn0038407	CG6126	11	1	2	10	15	16	8	7	25	69	94	77	70	45	45	22	24	16	3	30	17	20	63	83	35	33	31	35	22	24
CG6142	FBgn0039415	CG6142	0	0	0	0	0	1	1	0	6	18	2	3	0	4	3	1	1	1	0	13	4	2	16	11	1	1	0	1	1	1
CG6280	FBgn0033866	CG6280	0	0	0	0	0	0	0	3	2	0	0	0	0	0	0	0	1	1	2	4	3	252	5	2	0	0	0	0	0	0
CG6553	FBgn0033880	CG6553	0	0	0	0	0	0	0	0	0	0	0	0	0	0	0	1	0	0	0	1	1	1	1	0	1	1	1	0	0	0
CG6652	FBgn0036687	CG6652	0	0	1	0	0	1	1	1	1	0	0	0	0	0	0	6	16	18	18	34	54	62	58	54	83	118	126	0	0	0
CG7135	FBgn0030895	CG7135	0	0	0	0	0	0	0	0	0	0	0	0	0	0	0	0	0	1	1	2	3	3	14	3	4	4	5	1	0	1
CG8034	FBgn0031011	CG8034	11	5	14	30	24	14	11	10	16	21	23	23	11	9	8	12	20	28	24	25	15	7	4	15	16	14	12	14	10	10
CG8160	FBgn0034011	CG8160	0	0	0	0	1	1	1	7	8	35	353	227	361	243	106	51	32	7	1	1	2	2	1	1	1	1	1	0	0	0
CG8736	FBgn0033308	CG8736	0	0	0	0	0	0	0	3	27	105	29	21	1	2	34	9	1	1	10	1411	86	108	2169	1838	1071	1	1	996	0	1
CG8916	FBgn0030707	CG8916	0	0	0	0	0	0	0	0	0	0	0	0	0	0	0	0	0	0	0	0	0	0	5	1	1	1	1	0	0	0
CG8925	FBgn0038404	CG8925	0	0	0	0	0	1	3	3	6	9	6	6	6	3	3	3	9	19	9	2	1	2	11	29	5	5	5	3	1	1
CG9427	FBgn0037721	CG9427	0	0	0	1	2	7	7	11	14	18	19	20	36	49	35	22	25	53	91	63	31	18	83	20	33	33	38	13	6	5
CG9628	FBgn0036433	CG9628	1	2	3	19	53	132	188	174	135	85	41	52	20	19	8	6	12	27	26	10	64	97	98	19	49	50	48	26	15	12
CG9689	FBgn0030159	CG9689	0	0	0	1	2	32	50	32	11	6	1	2	1	14	3	3	6	12	25	15	51	140	23	8	8	7	10	3	1	2
CG9812	FBgn0034860	CG9812	0	0	0	0	0	3	3	5	11	17	25	20	36	56	32	44	64	377	719	87	74	44	66	133	44	28	25	48	12	11
Capa	FBgn0039722	Capa	0	0	0	0	0	0	0	0	1	3	7	6	8	6	2	4	4	5	5	6	7	10	8	6	10	15	21	5	3	4
Cda4	FBgn0052499	Cda4	1	1	1	4	9	31	44	132	300	149	50	46	62	92	142	41	25	16	14	160	37	50	40	27	15	2	1	8	0	0
Cdep	FBgn0265082	Cdep	0	3	9	10	9	9	12	11	10	11	12	12	10	6	4	4	7	10	11	12	13	11	10	9	6	7	7	4	2	2
Cht2	FBgn0022702	Cht2	39	2	1	7	16	24	16	29	20	30	34	27	25	14	21	24	34	41	36	148	70	42	17	29	8	3	3	24	29	31
Cp1	FBgn0013770	Cp1	432	401	337	283	251	327	219	229	212	170	79	83	64	145	178	229	446	677	698	650	306	262	322	141	366	287	226	413	344	356
Cp18	FBgn0000357	Cp18	0	1	1	1	0	0	0	0	0	0	0	0	1	0	1	1	0	0	1	1	1	1	1	3	1	2	3	1240	2475	2837
Cpr100A	FBgn0039805	Cpr100A	0	0	0	0	0	0	0	5	51	138	43	44	45	15	80	16	9	3	2	4150	185	182	442	615	226	4	2	173	1	1
Cpr30B	FBgn0032125	Cpr30B	0	0	0	0	0	0	0	0	0	0	0	0	0	0	0	0	0	1	0	13	0	129	6062	105	0	0	0	0	0	1
Cpr30F	FBgn0051876	Cpr30F	0	0	0	0	0	0	0	0	0	0	0	0	2	135	74	1	0	1	0	11	0	91	4730	131	0	0	0	0	0	0
Cpr47Ec	FBgn0033600	Cpr47Ec	0	0	0	0	0	0	0	0	0	1	7	7	7	61	595	216	20	1	0	78	12	29	5	1	0	0	0	0	0	0
Cpr56F	FBgn0034499	Cpr56F	1	1	0	0	2	2	2	52	351	446	187	164	20	61	94	3	8	16	19	5	30	82	547	36	9	10	10	0	0	0
Cpr64Aa	FBgn0035510	Cpr64Aa	0	0	0	0	0	0	0	0	0	1	0	0	0	0	0	7	9	5	1	44	4	130	5585	1584	14	1	0	15	0	0
Cpr64Ac	FBgn0035512	Cpr64Ac	0	0	0	0	0	0	0	0	2	5	1	3	0	0	1	0	0	1	4	36	3	223	8027	403	2	1	1	2	0	0
Cpr66D	FBgn0052029	Cpr66D	1	1	1	1	2	3	4	110	345	77	2	3	2	126	86	3	5	8	13	15	6	782	313	28	5	5	11	5	3	3
Cpr73D	FBgn0036680	Cpr73D	0	1	1	3	4	2	1	1	0	3	12	10	2	1	2	0	0	0	1	1	4	11	25	27	4	5	5	3	1	1
Cpr92A	FBgn0038714	Cpr92A	0	0	0	0	0	0	0	0	0	0	0	0	0	0	0	0	1	1	0	1	2	24	492	21	19	3	3	22	0	0
Cyp313a1	FBgn0038236	Cyp313a1	0	0	0	0	0	0	0	0	0	0	0	0	0	0	0	0	0	0	0	0	0	0	0	2	41	33	27	4	3	2
Cyp49a1	FBgn0033524	Cyp49a1	0	0	0	0	1	1	3	19	25	6	3	4	4	16	9	2	0	0	0	1	1	11	11	6	6	8	8	2	2	1
Cyp4p1	FBgn0015037	Cyp4p1	0	0	0	0	0	0	0	1	2	8	34	48	18	35	44	28	15	6	1	1	0	1	5	13	32	32	35	16	14	20
Cyp6w1	FBgn0033065	Cyp6w1	0	0	0	0	0	0	0	0	0	0	2	6	7	28	16	37	11	3	0	0	0	0	1	3	27	29	46	8	14	31
Cyp9b2	FBgn0015039	Cyp9b2	0	3	19	31	29	20	9	4	9	12	15	16	15	20	43	139	72	32	50	9	27	4	3	15	24	22	16	18	14	16
DIP-kappa	FBgn0051814	CG31814	0	0	0	0	0	0	1	3	5	6	5	5	4	1	0	0	1	1	1	2	3	5	3	1	1	1	2	1	0	0
Drsl4	FBgn0052282	Drsl4	0	0	0	0	0	0	0	2	2	1	1	1	0	0	0	0	0	1	8	1	1	0	1	66	251	273	189	80	57	27
ELOVL	FBgn0037534	CG2781	1	1	1	1	3	6	11	88	361	104	27	31	27	105	40	13	29	33	11	145	61	19	51	21	35	39	40	23	21	22
ETHR	FBgn0038874	ETHR	0	0	0	0	0	0	1	4	3	2	2	2	3	3	2	3	4	3	2	1	1	3	8	3	1	1	1	1	0	0
FMRFa	FBgn0000715	FMRFa	0	0	0	0	0	0	0	0	1	2	3	4	6	3	2	1	1	1	1	1	1	2	2	2	4	6	13	2	1	2
Fhos	FBgn0266084	Fhos	10	8	2	3	6	6	12	19	29	15	9	8	3	5	6	6	10	13	15	7	9	18	38	16	36	26	14	21	11	8
Fim	FBgn0024238	Fim	42	11	24	37	38	39	38	44	48	49	57	52	39	42	24	19	27	40	61	51	42	32	17	22	26	27	28	42	45	45
Gfat1	FBgn0287209	Data Not Found
Glut1	FBgn0264574	Glut1	7	4	2	2	3	7	12	15	14	14	13	14	12	5	2	2	5	10	10	9	12	20	10	11	7	7	8	6	5	5
GstE14	FBgn0033817	GstE14	0	4	3	1	1	0	0	0	0	1	1	1	1	1	1	2	2	1	0	0	1	4	1	8	8	5	4	6	2	2
Hf	FBgn0014000	Hf	0	1	2	8	11	16	9	3	2	4	6	8	12	13	32	43	31	15	15	7	25	18	9	9	31	30	23	16	17	22
Hn	FBgn0001208	Hn	2	0	0	0	1	4	11	19	23	16	17	31	45	35	66	71	54	28	24	30	17	19	56	24	58	39	29	27	33	30
Hr4	FBgn0264562	Hr4	1	1	1	7	12	41	82	97	16	5	1	1	1	10	3	0	6	32	25	9	5	74	14	5	1	0	1	2	1	1
Hydr2	FBgn0014906	Hydr2	54	31	20	19	21	25	20	16	15	14	16	18	22	16	15	22	21	18	19	26	32	33	25	25	35	48	58	30	38	40
IRSp53	FBgn0052082	CG32082	0	0	0	1	2	6	27	78	29	31	18	19	13	28	12	7	9	6	4	6	20	86	50	21	18	12	13	12	3	3
Jon65Aii	FBgn0035666	Jon65Aii	0	0	0	0	0	0	0	0	0	0	5	6	8	6	6	26	40	49	40	1	0	0	0	0	0	0	0	0	0	0
Jra	FBgn0001291	Jra	39	12	16	19	21	39	34	32	39	58	46	49	26	18	16	24	32	46	57	42	37	25	21	25	22	30	35	23	29	32
Kank	FBgn0027596	Kank	1	3	6	16	14	12	10	16	20	27	19	16	10	10	13	8	9	7	8	9	23	30	21	30	23	27	29	8	3	4
Lmpt	FBgn0261565	Lmpt	0	0	0	2	3	6	11	17	20	18	15	16	10	9	12	9	12	17	9	8	6	23	77	84	41	28	22	25	7	6
Lst	FBgn0034140	Lst	0	1	1	1	1	2	2	2	10	55	51	55	24	17	57	121	199	155	57	40	9	14	20	29	35	26	23	22	13	14
Mef2	FBgn0011656	Mef2	13	10	23	27	45	34	27	27	23	19	20	18	16	9	9	7	10	17	9	14	24	20	15	14	11	11	13	13	9	10
Mlc2	FBgn0002773	Mlc2	6	4	4	10	25	120	242	921	1741	2211	2151	1980	1880	1840	3054	2647	1245	307	52	58	32	664	4653	6990	2736	618	292	2379	129	83
Msr-110	FBgn0015766	Msr-110	2	1	1	4	11	23	39	396	630	351	221	197	252	234	348	268	263	152	112	220	141	637	537	334	563	622	731	401	120	101
MtnD	FBgn0053192	MtnD	0	0	0	0	0	0	0	0	6	22	85	88	144	72	92	79	69	85	154	102	122	39	24	16	14	6	15	6	12	24
NAAT1	FBgn0029762	NAAT1	0	0	0	0	1	1	1	1	4	7	11	13	14	11	8	19	9	7	5	1	0	0	1	3	19	29	33	12	8	9
NaCP60E	FBgn0085434	NaCP60E	0	1	2	4	4	2	3	2	4	4	4	5	5	2	1	1	2	2	2	2	3	8	8	4	7	7	6	3	2	2
Neos	FBgn0024542	Neos	50	59	25	24	31	38	23	20	16	9	27	20	7	6	6	8	12	14	14	17	25	17	9	9	11	17	19	11	19	23
Nep2	FBgn0027570	Nep2	1	1	1	5	8	74	101	150	93	65	15	15	19	90	33	13	54	157	104	40	26	158	78	48	15	15	16	18	24	26
Nhe2	FBgn0040297	Nhe2	1	9	19	13	9	5	8	7	8	8	14	14	16	9	5	4	9	14	18	4	5	6	6	10	12	13	12	6	3	3
Nlg4	FBgn0083975	Nlg4	0	0	0	0	0	0	0	1	3	4	4	4	5	1	0	0	1	1	1	1	2	3	3	2	2	3	4	1	0	0
Npl4	FBgn0039348	Npl4	101	17	32	29	23	23	20	17	10	8	5	5	14	24	22	28	44	50	51	44	54	39	31	89	267	409	335	176	135	102
Or82a	FBgn0041621	Or82a	0	0	0	0	0	0	0	0	0	0	1	1	0	0	0	0	0	0	0	0	0	0	0	0	0	0	1	0	0	0
Past1	FBgn0016693	Past1	65	39	18	32	53	120	97	86	89	98	103	101	109	146	123	55	60	78	96	66	77	92	82	104	101	107	117	67	56	59
Pu	FBgn0003162	Pu	1	1	0	1	4	24	23	15	9	22	14	15	28	19	18	18	75	172	154	15	9	16	265	103	38	18	16	23	7	8
Pxn	FBgn0011828	Pxn	0	2	7	21	27	46	47	72	56	41	13	12	22	27	31	32	38	20	22	15	28	46	44	17	18	18	16	22	7	6
Rab32	FBgn0002567	Rab32	59	36	11	10	17	20	24	24	33	28	30	32	14	13	9	15	29	41	23	25	20	35	34	52	32	26	24	36	42	41
Rab9E	FBgn0052673	Rab9E	0	0	0	0	0	0	0	0	0	0	0	0	0	0	0	0	0	0	1	1	1	1	1	0	1	1	1	0	0	0
Rchy1	FBgn0031816	CG16947	0	0	1	4	8	22	36	51	31	27	10	11	17	14	12	16	21	18	14	30	26	31	21	27	6	5	7	6	5	5
Rh2	FBgn0003248	Rh2	0	0	0	0	0	0	0	0	0	0	0	0	0	0	0	0	0	0	0	0	0	0	1	9	11	12	12	6	3	3
Rh6	FBgn0019940	Rh6	0	0	0	0	0	1	0	1	1	1	1	1	2	0	0	0	0	0	0	0	0	0	0	4	5	7	11	3	1	1
RhoGAP100F	FBgn0039883	RhoGAP100F	0	0	0	1	2	2	6	6	9	9	9	10	9	3	1	0	1	2	2	4	7	12	7	1	2	2	2	1	1	1
Rox8	FBgn0005649	Rox8	183	231	139	119	118	92	93	82	56	33	42	38	25	26	23	28	46	66	85	81	79	54	25	36	26	29	33	59	91	92
Rsph1	FBgn0032478	CG5458	1	2	3	2	2	2	2	1	1	2	1	2	1	1	1	2	4	5	5	8	13	13	14	7	16	24	18	0	1	1
Rtnl1	FBgn0053113	Rtnl1	51	103	121	106	117	156	163	105	76	48	54	63	54	103	108	81	71	75	83	82	95	128	63	50	69	63	54	53	61	64
Sarm	FBgn0262579	Ect4	14	6	4	3	6	9	14	12	22	28	28	28	24	20	26	25	25	23	23	13	13	13	19	62	65	94	104	43	29	34
Scr	FBgn0003339	Scr	0	2	5	11	10	11	13	9	8	7	3	4	3	2	1	1	4	6	7	5	9	5	2	1	1	1	1	1	0	0
SecCl	FBgn0036727	CG7589	0	1	1	0	0	1	2	3	2	2	5	5	4	4	4	3	3	5	10	7	1	1	1	30	10	12	13	7	3	4
Ser7	FBgn0019929	Ser7	0	0	0	0	0	0	0	0	0	0	1	1	0	0	0	0	1	1	1	10	11	5	4	33	28	27	26	14	7	12
Shab	FBgn0262593	Shab	0	0	0	0	0	0	3	7	10	14	16	17	12	4	2	1	2	2	2	6	2	9	13	19	9	10	9	5	1	1
Six4	FBgn0027364	Six4	0	5	21	9	6	4	2	2	1	1	0	0	0	0	0	0	0	0	1	1	1	1	1	3	1	1	1	11	7	8
Sod3	FBgn0033631	Sod3	117	27	14	14	9	3	2	4	14	52	70	76	47	34	31	80	92	80	46	127	64	40	82	325	41	33	41	118	167	153
Sodh-2	FBgn0022359	Sodh-2	22	29	13	6	15	28	12	14	10	22	42	34	109	42	155	125	43	11	7	6	9	8	14	5	26	16	22	18	10	13
TM4SF	FBgn0020372	TM4SF	0	1	4	12	16	8	7	5	5	6	10	11	22	10	4	3	3	2	1	10	12	25	131	70	27	21	13	15	4	3
TTLL3B	FBgn0031853	TTLL3B	0	0	0	0	0	0	0	0	0	0	0	0	0	0	0	3	9	10	10	21	35	41	41	51	83	107	126	0	0	0
Tie	FBgn0014073	Tie	0	0	0	0	0	1	4	15	22	21	8	9	5	5	4	2	3	2	1	4	4	35	22	10	7	7	10	4	3	3
Tps1	FBgn0027560	Tps1	1	5	16	72	66	42	31	44	42	75	91	88	101	109	155	76	52	22	27	12	27	40	24	226	364	308	348	201	117	140
Ugt35A1	FBgn0026315	Ugt35a	12	7	3	6	11	8	15	16	23	22	34	47	20	28	28	47	20	9	1	0	0	1	6	4	17	20	17	10	12	12
Vajk1	FBgn0028938	CG16886	1	2	4	1	2	1	3	75	535	375	7	10	1	47	39	1	1	1	1	4	4	51	531	30	3	0	0	3	0	0
Vajk2	FBgn0032538	CG16885	1	1	0	0	3	3	3	50	452	1268	623	479	692	178	2516	620	591	497	65	54	4	208	2424	302	315	3	2	317	1	1
Vajk3	FBgn0028544	CG16884	1	1	0	1	3	4	5	73	485	1256	638	491	757	160	1877	514	427	325	45	55	2	159	2130	293	314	2	1	372	0	1
Vdup1	FBgn0035103	Vdup1	0	2	3	11	18	45	46	65	109	79	20	24	13	20	36	22	23	31	29	47	51	46	98	60	26	13	14	18	4	3
Zip89B	FBgn0038412	Zip89B	0	0	0	0	1	3	6	14	21	15	13	12	17	10	9	7	8	19	27	31	7	27	14	22	11	10	10	12	16	10
ase	FBgn0000137	ase	0	2	11	25	20	9	10	2	2	1	1	1	0	0	1	1	1	2	2	2	1	0	0	0	0	0	0	0	0	0
bs	FBgn0004101	bs	13	4	1	2	2	4	8	9	9	9	4	4	4	4	3	2	4	6	5	4	8	6	7	4	3	3	3	5	7	8
cac	FBgn0263111	cac	0	0	0	0	0	0	2	3	6	6	5	7	6	2	1	0	3	3	3	4	4	12	9	2	5	4	4	2	1	1
ckd	FBgn0035427	ckd	0	0	0	0	0	0	1	3	16	11	4	6	3	7	21	17	23	20	2	8	5	11	22	2	2	1	0	1	1	1
comt	FBgn0000346	comt	8	3	2	2	4	7	8	11	15	18	19	19	20	8	3	3	5	6	6	10	14	18	28	34	32	37	37	16	9	9
d	FBgn0041712	yellow-d	0	0	0	1	2	6	9	19	7	9	19	15	27	74	23	13	11	23	32	21	11	13	4	10	24	32	44	31	18	24
d	FBgn0000618	e(y)2	47	61	57	45	43	47	24	19	14	10	10	10	13	15	13	24	28	26	25	29	33	22	11	9	11	12	13	18	27	28
d	FBgn0016120	ATPsynD	232	235	151	136	147	211	190	234	281	404	498	462	618	670	579	306	168	136	130	127	143	219	569	847	885	633	291	686	321	261
d	FBgn0262029	d	1	11	34	41	34	35	24	16	14	9	3	2	2	2	3	7	15	18	21	28	58	30	6	4	2	1	1	1	0	0
d	FBgn0053194	CheA29a	0	0	0	0	0	0	0	0	0	0	0	0	0	0	0	0	0	0	0	1	1	1	0	0	1	1	1	0	0	0
dati	FBgn0262636	dati	0	0	0	0	0	2	4	7	7	5	3	4	4	1	1	1	3	5	5	8	11	8	5	5	5	5	7	3	3	3
disco-r	FBgn0285879	Data Not Found
dmrt11E	FBgn0030477	dmrt11E	0	2	7	11	2	1	1	1	0	1	1	0	1	0	0	0	0	0	0	0	0	0	0	0	0	1	0	0	0	0
ds	FBgn0284247	Data Not Found
fd59A	FBgn0004896	fd59A	0	0	0	1	1	3	3	2	2	2	1	1	1	0	0	1	1	2	3	3	3	2	1	1	1	1	1	0	0	0
fog	FBgn0000719	fog	22	13	11	10	16	13	15	15	14	10	9	10	7	4	3	3	6	11	9	21	6	7	6	5	4	5	6	12	18	17
fru	FBgn0004652	fru	0	0	0	0	0	0	0	0	0	1	4	3	3	4	9	3	3	1	1	1	2	8	13	3	3	3	4	2	1	1
ft	FBgn0001075	ft	1	6	31	49	48	22	36	16	6	5	3	3	5	3	2	3	8	9	11	12	28	14	5	2	2	1	1	1	0	0
grh	FBgn0259211	grh	1	12	17	30	31	21	22	16	11	15	9	9	7	5	7	4	10	11	14	14	23	26	9	10	5	3	3	3	1	1
hdly	FBgn0038842	hdly	0	0	0	0	1	1	2	3	8	15	26	24	16	14	24	28	31	30	27	47	27	23	34	23	17	16	15	13	8	7
heph	FBgn0011224	heph	20	28	12	12	14	11	16	9	12	9	14	17	8	5	3	7	19	25	23	25	43	22	11	6	11	15	13	7	12	12
how	FBgn0264491	how	19	35	42	43	56	52	85	69	61	46	23	27	15	15	13	8	22	32	30	16	24	33	33	14	18	13	11	16	15	15
iotaTry	FBgn0015001	iotaTry	0	0	0	0	0	1	1	1	1	7	14	12	13	21	19	83	42	15	2	0	1	0	0	4	20	24	21	23	13	18
kkv	FBgn0001311	kkv	0	2	2	4	9	25	44	111	61	30	21	22	17	44	46	28	28	20	21	165	85	125	58	24	18	2	2	13	0	0
l(2)41Ab	FBgn0262123	l(2)41Ab	0	0	0	0	0	0	1	0	0	0	0	1	0	0	0	0	1	2	3	4	6	6	5	1	4	4	2	0	0	0
mah	FBgn0285912	Data Not Found
ninaE	FBgn0002940	ninaE	0	0	0	0	0	0	0	0	0	0	0	0	0	0	0	0	0	0	3	4	0	6	249	587	1295	2253	3620	636	443	517
nub	FBgn0085424	nub	1	15	29	27	16	16	12	11	9	10	5	5	5	3	1	3	5	7	6	7	8	5	3	3	2	3	3	3	1	2
pip	FBgn0003089	pip	0	0	1	7	16	25	27	16	18	8	2	3	5	10	5	1	1	1	1	0	1	12	8	1	0	0	0	0	0	0
pr	FBgn0003141	pr	42	71	61	40	41	32	42	15	19	22	24	30	27	34	37	49	40	43	37	33	30	26	33	39	27	18	14	28	40	39
rn	FBgn0267337	rn	0	0	0	0	0	0	1	1	1	1	1	1	1	0	0	2	4	5	5	4	5	4	2	2	2	2	3	1	0	0
shot	FBgn0013733	shot	5	6	13	15	14	7	19	24	36	67	63	57	25	17	32	9	24	20	15	22	20	17	24	47	40	37	28	22	11	12
stw	FBgn0286203	Data Not Found
tsh	FBgn0003866	tsh	1	26	64	61	58	39	47	27	26	26	22	26	15	9	6	8	14	21	26	23	31	12	5	5	3	3	3	2	1	1
tum	FBgn0086356	tum	162	110	139	152	116	65	42	47	33	16	48	37	2	3	4	10	14	14	11	31	21	5	3	5	3	4	5	32	62	69
tutl	FBgn0010473	tutl	1	12	11	17	19	19	23	25	30	31	19	20	19	6	2	2	5	7	9	12	26	23	18	12	10	9	8	6	2	2
twin	FBgn0011725	twin	99	42	36	37	29	26	28	29	20	16	12	12	14	12	8	12	26	31	36	48	69	75	59	71	92	128	164	34	51	54
tx	FBgn0263118	tx	0	0	0	2	6	14	16	20	26	21	7	8	4	3	5	3	3	2	2	2	5	9	21	9	3	4	5	2	1	1
vari	FBgn0250785	vari	7	13	4	23	58	256	168	141	123	104	60	57	42	30	20	22	33	37	46	51	62	55	85	52	29	22	25	23	11	13
vri	FBgn0016076	vri	0	0	1	4	8	28	54	18	3	2	1	1	1	11	2	11	33	40	40	40	34	71	3	11	21	28	28	13	8	7
yellow-b	FBgn0032601	yellow-b	0	0	0	1	3	12	14	20	43	44	22	25	15	11	18	11	28	38	15	10	9	10	51	24	9	7	5	6	2	2
yellow-d2	FBgn0034856	yellow-d2	0	0	0	0	1	2	3	7	16	17	3	3	3	3	9	263	317	128	18	9	5	67	203	18	24	2	2	20	1	2
yellow-e	FBgn0041711	yellow-e	0	1	1	0	0	1	0	3	7	5	1	1	1	4	6	42	74	85	30	1	1	34	65	42	18	8	8	11	2	2
zip	FBgn0265434	zip	39	84	181	128	101	80	101	50	43	42	45	47	31	47	37	46	119	172	215	92	97	62	72	44	30	28	27	33	48	44
Psi28S-2442b	FBgn0082988	snoRNA:Psi28S-2442b	0	0	1	1	1	1	2	0	0	0	0	1	0	1	1	0	1	1	2	1	1	1	0	0	1	0	0	0	0	0
CR34046	FBgn0054046	CR34046	0	0	0	0	0	0	1	0	1	1	0	0	0	0	0	0	0	0	0	0	1	1	3	1	1	0	0	1	1	1
CR34335	FBgn0267910	MRE16	81	75	64	70	184	423	172	70	128	72	80	103	86	44	71	151	198	623	206	365	467	498	265	330	127	190	238	223	198	216
CR43126	FBgn0262741	MRE23	0	0	2	2	2	0	1	0	1	1	0	1	1	0	0	0	1	1	1	0	1	1	1	0	0	1	1	0	0	0
CR43431	FBgn0263379	CR43431	0	0	2	1	1	1	1	1	1	1	1	1	1	0	0	0	0	0	0	0	1	1	0	0	0	0	0	0	0	0
CR43966	FBgn0264697	CR43966	0	0	0	0	0	0	0	0	0	0	0	0	0	0	0	0	0	0	0	0	0	0	1	0	1	1	1	0	0	0
CR44017	FBgn0264787	CR44017	0	0	0	0	0	0	0	0	0	0	0	0	0	0	0	1	2	4	3	6	9	12	12	5	12	10	9	0	0	0
CR44042	FBgn0264834	CR44042	0	0	0	0	0	0	1	0	0	0	0	0	0	0	0	0	0	1	1	3	3	1	0	0	0	0	0	0	0	0
CR44146	FBgn0264995	CR44146	0	0	0	0	0	1	1	0	1	0	0	0	0	0	0	0	0	0	0	0	0	0	1	0	0	0	0	0	0	0
CR44923	FBgn0266228	CR44923	0	0	0	0	0	1	1	0	0	0	0	0	0	0	0	0	0	2	1	0	0	1	0	0	0	0	0	0	0	0
CR45030	FBgn0266390	CR45030	0	0	0	0	0	0	0	0	0	0	0	0	0	0	0	1	2	3	2	4	6	8	7	5	9	11	11	0	0	0
CR45159	FBgn0266652	CR45159	0	0	0	0	0	0	0	0	0	0	0	0	0	0	0	0	0	0	0	0	1	1	0	1	1	1	2	0	0	0
CR45179	FBgn0266689	CR45179	0	0	0	1	1	1	2	1	1	1	1	1	1	1	1	1	1	1	1	1	2	1	1	0	0	0	1	0	0	1
CR45320	FBgn0266859	CR45320	0	0	0	0	0	0	1	0	0	0	0	0	0	0	0	0	0	0	0	0	0	0	1	0	0	0	0	0	0	0
CR45938	FBgn0267600	CR45938	0	0	0	0	0	0	0	1	4	3	0	0	0	1	0	0	0	0	0	2	1	1	3	2	0	0	0	0	0	0
CR45964	FBgn0267626	CR45964	0	0	0	0	0	0	0	0	0	0	0	0	0	0	0	0	0	1	1	1	1	1	1	0	1	2	2	0	0	0
CR46088	FBgn0267757	CR46088	0	0	0	0	0	0	0	0	0	0	0	0	0	0	0	0	0	0	0	0	0	0	0	0	0	0	0	0	0	0
CR46100	FBgn0267769	CR46100	0	0	0	0	0	0	0	0	0	0	0	0	0	0	0	0	1	2	0	0	0	0	0	0	0	0	0	0	0	0
CR46475	FBgn0287606	Data Not Found
CR46482	FBgn0287613	Data Not Found
CR44992	FBgn0266327	CR44992	0	0	0	0	0	0	0	0	0	0	0	0	0	0	0	0	1	2	2	1	1	0	0	0	0	0	0	0	0	0
CR45137	FBgn0266630	CR45137	0	1	6	7	5	1	1	0	0	0	0	0	0	0	0	0	0	0	0	0	0	0	0	0	0	0	0	0	0	0
CR45185	FBgn0267495	CR45185	0	0	0	0	0	0	1	1	3	1	0	1	0	1	1	1	1	1	2	4	2	3	4	0	0	0	0	0	0	0
CR45682	FBgn0267242	CR45682	0	0	0	0	0	0	1	2	12	3	0	0	1	2	1	0	1	1	1	2	1	2	4	1	2	1	1	1	0	0

## Sheet: Panel I
Category	Cluster	Number	Frac
Down	1	90	0.75
Down	3	30	0.25
Up	1	15	0.166667
Up	3	75	0.833333
Random	1	15	0.111111
Random	3	120	0.888889
