# Supplementary material for: Orai-mediated calcium entry determines activity of central dopaminergic neurons by regulation of gene expression
Source: eLife. 2024 Jan 30;12:RP88808. doi: 10.7554/eLife.88808 (PMC10945566; doi:10.7554/eLife.88808)
Supplement: Figure 2—figure supplement 2—source data 1. [file elife-88808-fig2-figsupp2-data1.xlsx]

## Sheet: Sheet1
	Dev stage	Set1	Set2
1	embryo 00-02hr	8	50
2	embryo 02-04hr	7	54
3	embryo 04-06hr	13	24
4	embryo 06-08hr	10	24
5	embryo 08-10hr	11	28
6	embryo 10-12hr	8	15
7	embryo 12-14hr	17	22
8	embryo 14-16hr	4	24
9	embryo 16-18hr	7	17
10	embryo 18-20hr	4	10
11	embryo 20-22hr	6	24
12	embryo 22-24hr	9	17
13	larva L1	4	6
14	larva L2	4	4
15	larva L3 12hr old	3	4
16	larva L3 puffstage 1-2	2	4
17	larva L3 puffstage 3-6	6	7
18	larva L3 puffstage 7-9	10	7
19	white prepupae new	11	7
20	white prepupae 12hr	9	9
21	white prepupae 24hr	10	14
22	pupae 2d postWPP	8	10
23	pupae 3d postWPP	5	6
24	pupae 4d postWPP	1	7
25	adult male 01day	4	10
26	adult male 05day	4	12
27	adult male 30day	2	13
28	adult female 01day	3	21
29	adult female 05day	10	34
30	adult female 30day	7	36
