# Supplementary material for: Orai-mediated calcium entry determines activity of central dopaminergic neurons by regulation of gene expression
Source: eLife. 2024 Jan 30;12:RP88808. doi: 10.7554/eLife.88808 (PMC10945566; doi:10.7554/eLife.88808)
Supplement: Figure 2—figure supplement 3—source data 1. [file elife-88808-fig2-figsupp3-data1.xlsx]

## Sheet: Sheet1
CS	THD'/+	Set2 RNAi-2/+	THD'>Set2 RNAi-1	Set2 RNAi-2/+	THD'>Set2 RNAi-2	Set2 RNAi-3/+	THD'>Set2 RNAi-3	Set2 RNAi-4/+	THD'> Set2 RNAi-4
900	87	545	121	245	241	187	156	345	126
104	105	441	130	211	210	105	314	239	136
214	214	373	111	133	211	214	311	128	155
238	238	605	264	606	287	238	249	329	157
733	733	900	253	657	264	733	276	459	150
676	676	117	57	125	311	676	156	506	169
737	737	195	216	375	154	737	98	396	199
900	900	206	249	156	274	900	411	391	178
172	172	235	55	900	101	172	406	491	186
235	235	256	78	900	99	235	315	675	192
492	492	270	94	421	189	492	293	375	194
501	501	294	134	189	169	501	245	265	197
735	735	316	129	246	125	735	247	261	198
900	900	330	181	246	175	900	196	561	298
277	277	390	291	900	193	277	75	358	211
303	303	420	148	159	196	303	96	350	233
408	408	223	278	356	289	408	402	399	241
415	415	291	217	650	260	415	311	342	247
395	395	395	127	667	230	395	217	373	250
572	572	431	233	482	147	572	223	327	454
540	540	490	137	287	156	540	246	315	256
575	575	463	136	133	186	575	450	313	259
584	584	501	187	311	210	584	377	412	279
596	596	520	227	345	178	596	369	309	286
65	65	227	254	456	265	265	345	328	287
95	95	283	282	189	256	195	193	302	289
113	113	244	154	289	296	113	187	900	299
150	150	262	285	287	200	150	83	745	300
174	174	319	301	444	189	174	415	150	316
204	204	283	316	468	211	204		174	341
526	526	428	254	372	256	526		204	347
655	655	900	222	689	311	655		526	347
900	900	365	234	772	356	900		655	369
900	900	654	234	397	314	900		900
289	289	478				289		145
303	303	520				303		289
404	404					404		303
510	510					510		900
900	900					900		890
203	203					203		765
293	293					293		125	410
327	327					327		211
438	438					438		900
442	442					442		900	413
495	495					495		666	416
900	900							658	425
810									486
650									523
900									547
609									745
759
