# Supplementary material for: Orai-mediated calcium entry determines activity of central dopaminergic neurons by regulation of gene expression
Source: eLife. 2024 Jan 30;12:RP88808. doi: 10.7554/eLife.88808 (PMC10945566; doi:10.7554/eLife.88808)
Supplement: Figure 2—figure supplement 4—source data 1. [file elife-88808-fig2-figsupp4-data1.xlsx]

## Sheet: Sheet1
CS	E180A/+	SetRNAi-1/+	MB504BGAL4/+	MB504B>E180A	MB438B/+	MB438B> E180A	MB296BGAL4>Set2 RNAi	MB504B>Set2 RNAi	MB438B>Set2 RNAi
900	44	545	36	199	214	300	170	111	69
104	79	441	147	65	900	495	148	89	147
214	166	373	276	72	600	642	137	91	234
238	184	605	286	80	540	800	122	125	236
733	216	900	376	109	555	650	120	136	256
676	229	117	403	141	320	520	111	221	257
737	249	195	416	44	500	449	108	172	307
900	317	206	587	128	515	405	91	119	376
172	367	235	720	201	900	900	91	132	41
235	368	256	710	215	900	338	86	143	121
492	469	270	900	159	520	557	79	216	137
501	456	294	793	95	900	800	78	166	390
735	530	316	900	130	764	700	73	174	396
900	576	330	900	252	586	562	72	172	371
277	585	390	900	433	735	145	69	143	366
303	887	420	240	450	410	215	60	216	373
408	900	223	246	130	615	670	54	136	372
415	80	291	900	150	552	650	50	193	305
395	125	395	900	110	170	900	46	191	59
572	214	431	900	59	278	344	44	195	168
540	221	490	246	78	296	735	43	215	404
575	254	463	213	134	455	357	43	199	345
584	289	501	259	113	489	900	34	229	224
596	354	520	271	214	742	243	31	215	198
65	366	227	276	276	811	440	24	247	236
95	421	283	307	90	356	453	23	154	202
113	396	244	219	147	470	620	22	191	176
150	457	262	321	89		586	21	220	245
174	493	319	423	125		735	20	135	263
204	553	283	403	243		410	19	184	318
526	570	428	730	350		615	17	254	289
655	563	900	747	260		542	16	141	263
900	733	365	808	254		468	15	196	200
900	723	654	825	176		411	15	298	165
289	715	478	64	459		345	15		145
303	733	520	126	515			14		286
404	816		185	159			13		139
510	900		328	36			12		201
900	900		319	181			11		261
203	881		381	226			11		225
293			391				11		376
327			449				10		431
438			900				10		366
442			900				10		305
495			900				9		345
900							9		900
810							9		711
650							8		456
900							8		611
609							8		519
759							7		636
							3		711
							1		546
							0
