# Supplementary material for: Orai-mediated calcium entry determines activity of central dopaminergic neurons by regulation of gene expression
Source: eLife. 2024 Jan 30;12:RP88808. doi: 10.7554/eLife.88808 (PMC10945566; doi:10.7554/eLife.88808)
Supplement: Figure 2—figure supplement 5—source data 1. [file elife-88808-fig2-figsupp5-data1.xlsx]

## Sheet: Sheet1
CS	THD'/+	THD'>E180A	THD'>E180A; GCaMP6m	THD'>Set2 RNAi	THD'>Set2RNAi;STIM_OE
900	187	0	0	121	57
104	87	0	0	130	116
214	105	0	0	111	129
238	214	0	0	264	126
733	238	0	0	253	126
676	733	0	0	57	159
737	676	0	0	216	175
900	737	0	0	349	189
172	900	0	0	55	226
235	172	0	0	78	232
492	235	0	0	94	273
501	492	0	0	134	363
735	501	0	0	129	369
900	735	0	0	181	399
277	900	0	0	291	442
303	277	0	0	148	641
408	303	0	0	278	704
415	408	0	0	217	732
395	415	0	0	127	739
572	395	0	0	233	900
540	572	0	0	137	900
575	540	0	0	136	900
584	575	0	0	187	179
596	584	0	0	227	196
65	596	0	0	254	206
95	65	0	0	282	142
113	95	0	0	154	131
150	113	0	0	285	283
174	150	0	0	301	304
204	174	0		316	315
526	204	0		454	388
655	526	0		222	441
900	655	0		234	628
900	900	0		234	671
289	900	0			521
303	289	0			533
404	303	0			645
510	404	0
900	510	0
203	900	0
293	203	0
327	293	0
438	327	0
442	438	0
495	442	0
900	495	0
810	900	0
650		0
900		0
609
759
