# Supplementary material for: Orai-mediated calcium entry determines activity of central dopaminergic neurons by regulation of gene expression
Source: eLife. 2024 Jan 30;12:RP88808. doi: 10.7554/eLife.88808 (PMC10945566; doi:10.7554/eLife.88808)
Supplement: Figure 2—figure supplement 6—source data 1. [file elife-88808-fig2-figsupp6-data1.xlsx]

## Sheet: Sheet1
Gene	Transcript ID	Counts
Kdm4A	NM_136487	0.973523
Kdm4A	NM_001259265	0
Kdm4B	NM_176164	0
Kdm4B	NM_001169666	4.36411
Kdm4B	NM_001169667	0
Kdm4B	NM_001169668	29.7482
Kdm4B	NM_001274013	0
