# Supplementary material for: Orai-mediated calcium entry determines activity of central dopaminergic neurons by regulation of gene expression
Source: eLife. 2024 Jan 30;12:RP88808. doi: 10.7554/eLife.88808 (PMC10945566; doi:10.7554/eLife.88808)
Supplement: Figure 2—figure supplement 7—source data 1. [file elife-88808-fig2-figsupp7-data1.xlsx]

## Sheet: Sheet1
CS	Kdm4A RNAi	Kdm4B RNAi	THD'>Kdm4A RNAi	THD'>Kdm4B RNAi	E180A	E180A; Kdm4aRNAi	THD'>E180A; Kdm4BRNAi
900	423	87	127	63	0	4	106
104	307	105	512	80	0	3	144
214	484	214	58	75	0	5	194
238	611	238	273	53	0	9	229
733	900	733	72	145	0	1	249
676	523	676	181	272	0	2	253
737	307	737	386	281	0	1	263
900	484	900	262	229	0	8	273
172	611	172	195	201	0	0	190
235	900	235	353	362	0	0	288
492	241	492	370	426	0	0	356
501	250	501	384	466	0	0	391
735	284	735	409	900	0	0	261
900	331	900	900	900	0	0	449
277	360	277	280	900	0	0	626
303	391	303	165	781	0	0	735
408	421	408	106	70	0	0	815
415	449	415	150	135	0	0	900
395	471	395	284	86	0	0	889
572	477	572	490	63	0	0	900
540	371	540	72	74	0	0	94
575	345	575	259	73	0	0	74
584	397	584	518	107	0	0	64
596	431	596	197	124	0	0	119
65	416	65	129	184	0	0	182
95	367	95	277	200	0	0	375
113	494	113	338	229	0	0	51
150	567	150	336	238	0	0	129
174	595	174	390	258	0	0	245
204	676	204	102	115	0	0	385
526	889	526	302	170	0	0	312
655	900	655	369	245	0	0
900	655	900	401	3
900	900	900	421	10
289	900	289	288	26
303	289	303	178
404	303	404	297
510	404	510	435
900	510	900	559
203	900	203
293	900	293
327	900	327
438		438
442		442
495		495
900		900
810
650
900
609
759
