# Supplementary material for: Orai-mediated calcium entry determines activity of central dopaminergic neurons by regulation of gene expression
Source: eLife. 2024 Jan 30;12:RP88808. doi: 10.7554/eLife.88808 (PMC10945566; doi:10.7554/eLife.88808)
Supplement: Figure 2—figure supplement 8—source data 1. [file elife-88808-fig2-figsupp8-data1.xlsx]

## Sheet: Sheet1
Genotype	CS		THD'>E180A
GSK-343 (mM)	0	0.5 mM	0	0.1	0.2	0.5
	30	30	0	4	9	15
	32	33	0	5	11	18
	34	31	0	3	8	13
	35	33	0	4	10	14
