# Supplementary material for: Orai-mediated calcium entry determines activity of central dopaminergic neurons by regulation of gene expression
Source: eLife. 2024 Jan 30;12:RP88808. doi: 10.7554/eLife.88808 (PMC10945566; doi:10.7554/eLife.88808)
Supplement: Figure 3—figure supplement 1—source data 1. [file elife-88808-fig3-figsupp1-data1.xlsx]

## Sheet: Panel B
Time	WT-1	WT-2	WT-3	WT-4	WT-5	WT-6	WT-7	WT-8	WT-9	WT-10	WT-11	WT-12	WT-13	WT-14	WT-15	WT-16	WT-17	WT-18	WT-19	WT-20	WT-21	WT-22	WT-23	WT-24	WT-25	WT-26	WT-27	WT-28	WT-29	WT-30	WT-31	WT-32	WT-33	WT-34	WT-35	WT-36	WT-37	WT-38	WT-39	WT-40	WT-41	WT-42	WT-43	WT-44	WT-45	WT-46	WT-47	WT-48	WT-49
1	-0.0213588	-0.00414845	-0.0204678	0.0109283	0.010682	-0.0213588	0.0703454	0.0614712	0.101461	0.0135278	0.0287523	0.013108	-0.0214806	-0.0209708	0.0411943	-0.148433	-0.115654	-0.0045393	-0.098526	-0.0899518	-0.0213588	-0.00414845	-0.036433	0.0109283	0.010682	-0.0213588	0.0703454	0.101461	0.0135278	0.0287523	0.013108	-0.0214806	-0.0209708	0.0597003	0.0879854	-0.0244483	-0.0342515	-0.0287061	-0.098526	-0.0899518	-0.098526	-0.0899518	-0.0711325	0.0177252	0.0971483	0.0217532	0.0503414	0.0258784	0.0176268
2	-0.0479827	-0.0823621	-0.036433	-0.0112837	0.031796	-0.0479827	-0.104749	-0.0286782	0.0226738	-0.0518761	-0.0592354	-0.0362756	-0.00638746	0.0239481	0.055432	-0.125811	-0.0698692	-0.0287061	-0.0992411	-0.0671681	-0.0479827	-0.0823621	0.0532835	-0.0112837	0.031796	-0.0479827	-0.104749	0.0226738	-0.0518761	-0.0592354	-0.0362756	-0.00638746	0.0239481	0.0597003	0.0879854	-0.063077	-0.069946	-0.0572238	-0.0992411	-0.0671681	-0.0992411	-0.0671681	-0.0896704	0.00217027	0.0860924	0.042865	0.029877	0.0324894	0.00264166
3	-0.0299183	0.029526	0.0532835	0.0243903	0.0508428	-0.0299183	0.0790355	0.00611115	-0.0211099	-0.0230919	0.0538343	0.0121842	-0.00429813	0.0146449	0.019912	-0.141068	-0.0853964	-0.0572238	-0.0929494	-0.0808694	-0.0299183	0.029526	0.00330665	0.0243903	0.0508428	-0.0299183	0.0790355	-0.0211099	-0.0230919	0.0538343	0.0121842	-0.00429813	0.0146449	0.0597003	0.0879854	-0.034453	-0.0428642	0.0643347	-0.0929494	-0.0808694	-0.0929494	-0.0808694	-0.0860408	0.00889315	0.0842705	-0.0702428	-0.00757916	0.000974498	0.00789206
4	0.0331994	-0.0570795	0.00330665	-0.0301286	-0.0127278	0.0331994	-0.017336	-0.0048502	0.0204335	0.0198715	-0.0115005	-0.0104543	-0.0499909	-0.00436249	0.0683796	-0.121337	-0.0482839	0.0643347	-0.069215	-0.0971015	0.0331994	-0.0570795	-0.0193053	-0.0301286	-0.0127278	0.0331994	-0.017336	0.0204335	0.0198715	-0.0115005	-0.0104543	-0.0499909	-0.00436249	0.0597003	0.0879854	-0.0182064	-0.0683625	0.0512627	-0.069215	-0.0971015	-0.069215	-0.0971015	-0.104131	0.00364368	-0.0659897	0.007492	-0.0484969	-0.021006	0.001372
5	-0.0401795	-0.0644576	-0.0193053	-0.0809375	0.0607074	-0.0401795	0.0383188	0.00202153	-0.0302311	0.0240856	0.0324588	-0.00772013	-0.0411411	0.0171759	-0.0802868	-0.0889398	-0.0763628	0.0512627	-0.0120162	-0.0712262	-0.0401795	-0.0644576	-0.0370049	-0.0809375	0.0607074	-0.0401795	0.0383188	-0.0302311	0.0240856	0.0324588	-0.00772013	-0.0411411	0.0171759	0.0597003	0.0879854	-0.0224768	-0.0834527	-0.0316622	-0.0120162	-0.0712262	-0.0120162	-0.0712262	-0.117862	0.000748391	0.0491401	0.025955	-0.0275183	-0.021928	0.00018946
6	-0.0510795	0.0146945	-0.0370049	0.0112242	0.0501595	-0.0510795	0.0251187	-0.0220855	-0.0116919	0.00610298	0.00594346	0.00525231	0.0111855	0.030391	0.0569657	-0.0802643	-0.0196789	-0.0316622	-0.0501953	-0.0442903	-0.0510795	0.0146945	-0.0667229	0.0112242	0.0501595	-0.0510795	0.0251187	-0.0116919	0.00610298	0.00594346	0.00525231	0.0111855	0.030391	0.0597003	0.0663644	-0.0233327	-0.0208567	-0.0606399	-0.0501953	-0.0442903	-0.0501953	-0.0442903	-0.0938981	0.00532609	-0.0199983	0.00463596	0.0694973	-0.0217685	0.00612689
7	-0.0328987	0.0115752	-0.0667229	-0.0601136	-0.0213686	-0.0328987	0.134586	0.0225583	0.0251309	0.0353869	0.0878286	0.0300529	-0.0230599	0.0365602	0.0879854	-0.0531987	-0.0293043	-0.0606399	-0.0548634	-0.072646	-0.0328987	0.0115752	-0.0449734	-0.0601136	-0.0213686	-0.0328987	0.134586	0.0251309	0.0353869	0.0878286	0.0300529	-0.0230599	0.0365602	0.0338584	-0.00411072	-0.0298461	-0.0490211	0.0155851	-0.0548634	-0.072646	-0.0548634	-0.072646	-0.0453242	0.00481136	0.0575148	-0.0374281	0.0223153	0.0450853	0.00481935
8	0.0167785	-0.0153675	-0.0449734	-0.0240175	-0.0418472	0.0167785	0.0353286	-0.017276	0.0596412	0.0136075	0.00321156	-0.0350508	-0.00456545	-0.0216676	0.0663644	-0.0289646	-0.0531089	0.0155851	-0.0731866	-0.00754241	0.0167785	-0.0153675	-0.0312488	-0.0240175	-0.0418472	0.0167785	0.0353286	0.0596412	0.0136075	0.00321156	-0.0350508	-0.00456545	-0.0216676	0.0379365	0.019811	-0.000504888	-0.0297975	0.0363114	-0.0731866	-0.00754241	-0.0731866	-0.00754241	-0.0860015	-0.000361426	0.0239457	-0.0490572	0.0474193	-0.0321256	-0.00035681
9	0.00437675	0.0695316	-0.0312488	0.0473093	0.00758988	0.00437675	-0.00331894	0.0179984	0.0310336	-0.00800217	-0.0256039	0.000733617	0.00331001	0.014971	-0.00411072	-0.0304707	-0.0245204	0.0363114	-0.0359975	-0.048379	0.00437675	0.0695316	0.0569022	0.0473093	0.00758988	0.00437675	-0.00331894	0.0310336	-0.00800217	-0.0256039	0.000733617	0.00331001	0.014971	0.148872	0.0597003	-0.00275373	-0.0221808	0.0243895	-0.0359975	-0.048379	-0.0359975	-0.048379	-0.0290792	0.00164223	0.0941689	0.00280181	0.0221581	-0.0599237	0.00285746
10	-0.00487969	-0.0322887	0.0569022	-0.140965	0.00946807	-0.00487969	0.0328559	0.0166414	0.0413678	0.000191607	-0.0292084	-0.000688598	-0.0791642	-0.0280373	0.019811	-0.011207	0.0206065	0.0243895	-0.0628417	-0.0505	-0.00487969	-0.0322887	-0.0364424	-0.140965	0.00946807	-0.00487969	0.0328559	0.0413678	0.000191607	-0.0292084	-0.000688598	-0.0791642	-0.0280373	0.0804594	0.0338584	0.0151544	-0.00629137	-0.0313881	-0.0628417	-0.0505	-0.0628417	-0.0505	-0.0230255	-0.00678379	-0.0385696	0.0118416	0.0103264	0.0189794	-0.00566052
11	-0.0659562	0.0380103	-0.0364424	0.0644462	-0.00799434	-0.0659562	0.00525709	0.0396122	0.0135526	0.0159368	-0.00171247	0.0157876	0.0159058	-0.000662197	0.0597003	-0.00717047	-0.00383107	-0.0313881	-0.0430323	-0.0377891	-0.0659562	0.0380103	0.0094565	0.0644462	-0.00799434	-0.0659562	0.00525709	0.0135526	0.0159368	-0.00171247	0.0157876	0.0159058	-0.000662197	0.10985	0.0379365	-0.0132778	-0.0417265	-0.042708	-0.0430323	-0.0377891	-0.0430323	-0.0377891	-0.0238541	0.00384713	-0.0293192	0.0453971	0.0314026	-0.00925624	0.00493175
12	0.056112	0.116254	0.0094565	0.072116	-0.033567	0.056112	-0.0826009	0.0293614	0.0646792	-0.0454527	-0.0297512	0.0319284	0.0585947	-0.00920818	0.0338584	-0.0249431	-0.0528952	-0.042708	-0.0340361	-0.00323021	0.056112	0.116254	-0.0349987	0.072116	-0.033567	0.056112	-0.0826009	0.0646792	-0.0454527	-0.0297512	0.0319284	0.0585947	-0.00920818	0.163734	0.148872	0.00730408	-0.0443002	0.0022145	-0.0340361	-0.00323021	-0.0340361	-0.00323021	-0.0394205	-6.78e-05	-0.0979129	-0.0460534	0.00592432	0.00300703	-0.00111019
13	0.0506832	-0.0398359	-0.0349987	-0.0360342	0.0413479	0.0506832	-0.0847731	-0.0250438	-0.0230121	-0.0234042	-0.0584647	-0.0297673	-0.016194	0.00240971	0.0379365	-0.0143699	-0.0331183	0.0022145	-0.0317161	-0.0319694	0.0506832	-0.0398359	0.00176919	-0.0360342	0.0413479	0.0506832	-0.0847731	-0.0230121	-0.0234042	-0.0584647	-0.0297673	-0.016194	0.00240971	0.156737	0.0804594	0.0260739	-0.0347406	-0.0331646	-0.0317161	-0.0319694	-0.0317161	-0.0319694	-0.0262764	-0.00593143	0.040573	-0.0134745	0.0579613	0.0653445	-0.00470297
14	-0.000779318	-0.00812827	0.00176919	-0.0670091	-0.0315081	-0.000779318	-0.074367	-0.0321505	0.00121299	-0.0434976	-0.0572562	-0.0271587	-0.00726154	0.00833081	0.148872	-0.0162526	-0.049673	-0.0331646	-0.00683558	-0.0154634	-0.000779318	-0.00812827	0.0142001	-0.0670091	-0.0315081	-0.000779318	-0.074367	0.00121299	-0.0434976	-0.0572562	-0.0271587	-0.00726154	0.00833081	0.0689028	0.10985	-0.00417032	0.000452996	0.0138085	-0.00683558	-0.0154634	-0.00683558	-0.0154634	-0.00705041	-0.0060432	-0.0186131	0.0141331	-0.00450604	-0.0169118	-0.00507015
15	0.0485658	-0.030076	0.0142001	-0.0445575	0.00463973	0.0485658	-0.0944555	-0.0278896	0.12144	-0.0170793	-0.0581318	-0.0141834	-0.043496	-0.0232457	0.0804594	-0.0194457	-0.0128236	0.0138085	-0.0440596	-0.0228323	0.0485658	-0.030076	-0.0203646	-0.0445575	0.00463973	0.0485658	-0.0944555	0.12144	-0.0170793	-0.0581318	-0.0141834	-0.043496	-0.0232457	0.116942	0.163734	0.0147737	0.00619383	0.0564064	-0.0440596	-0.0228323	-0.0440596	-0.0228323	0.0369078	-0.00319547	-0.00782021	-0.0875982	-0.0452335	0.0357843	-0.00268565
16	-0.0354222	-0.0607064	-0.0203646	0.0553652	-0.00497817	-0.0354222	0.0353187	-0.00478157	0.0201135	-0.0013003	0.00146626	-0.0185851	0.0212945	0.0330874	0.10985	-0.018798	-0.00161172	0.0564064	-0.0019112	-0.0203541	-0.0354222	-0.0607064	0.0208843	0.0553652	-0.00497817	-0.0354222	0.0353187	0.0201135	-0.0013003	0.00146626	-0.0185851	0.0212945	0.0330874	0.0558184	0.156737	0.0204873	0.0117319	-0.0797267	-0.0019112	-0.0203541	-0.0019112	-0.0203541	-0.0127048	-0.00202642	0.0175855	0.00667735	0.0152286	0.0209419	-0.00106657
17	-0.0239077	-0.0131086	0.0208843	0.00848203	0.00342583	-0.0239077	-0.00497471	-0.00683354	-0.0568951	0.0159856	-0.00134661	-0.0159228	-0.00797381	-0.0214815	0.163734	-0.0247925	0.0467784	-0.0797267	0.00329039	0.0128967	-0.0239077	-0.0131086	-0.0132679	0.00848203	0.00342583	-0.0239077	-0.00497471	-0.0568951	0.0159856	-0.00134661	-0.0159228	-0.00797381	-0.0214815	0.0486252	0.0689028	-0.00962421	0.0145412	-0.018179	0.00329039	0.0128967	0.00329039	0.0128967	-0.00156478	-0.00262238	0.0643305	0.0312074	0.0103783	-0.0143016	-0.00246174
18	0.0413443	0.0191515	-0.0132679	0.118442	0.0451802	0.0413443	-0.0607841	0.0137764	0.0663956	-0.0321474	-0.0223202	0.0370193	0.0328931	-0.00297368	0.156737	-0.0215392	0.0200557	-0.018179	-0.0164467	-0.012685	0.0413443	0.0191515	0.0129627	0.118442	0.0451802	0.0413443	-0.0607841	0.0663956	-0.0321474	-0.0223202	0.0370193	0.0328931	-0.00297368	0.0757155	0.116942	0.0016082	-0.00901416	0.0363652	-0.0164467	-0.012685	-0.0164467	-0.012685	0.0542289	0.00851856	0.084024	-0.0184458	-0.0340655	0.0172211	0.00902
19	-0.0354392	0.0216562	0.0129627	0.011862	-0.0179729	-0.0354392	-0.0184435	-0.0181867	0.00490637	-0.0218232	-0.0293134	0.0153717	0.0136828	-0.00431954	0.0689028	-0.0244913	0.0275933	0.0363652	0.0396712	0.0242469	-0.0354392	0.0216562	0.0687988	0.011862	-0.0179729	-0.0354392	-0.0184435	0.00490637	-0.0218232	-0.0293134	0.0153717	0.0136828	-0.00431954	0.138183	0.0558184	0.0346443	0.00572413	-0.0130941	0.0396712	0.0242469	0.0396712	0.0242469	0.040228	0.00010499	-0.0631347	0.0351877	0.00408108	0.0217316	0.000518468
20	0.0136574	-0.0372069	0.0687988	0.021591	-0.0914452	0.0136574	0.0283568	0.0133453	0.00605749	0.00149128	0.0247759	0.019738	-0.0273934	-0.0393116	0.116942	-0.0712726	0.0257274	-0.0130941	0.00906733	-0.005463	0.0136574	-0.0372069	0.0212687	0.021591	-0.0914452	0.0136574	0.0283568	0.00605749	0.00149128	0.0247759	0.019738	-0.0273934	-0.0393116	0.103085	0.0486252	0.0223879	-0.0288506	-0.0367177	0.00906733	-0.005463	0.00906733	-0.005463	0.0533009	-0.00303725	0.00680903	0.0858462	-0.0197474	-0.025038	-0.00158009
21	0.0575568	-0.0490261	0.0212687	-0.0460709	-0.0390208	0.0575568	-0.000619263	-0.0270912	0.0201754	0.0127251	0.019552	-0.0134253	-0.0197061	-0.0345057	0.0558184	-0.0555483	0.0410985	-0.0367177	0.0151122	0.00421533	0.0575568	-0.0490261	0.000231725	-0.0460709	-0.0390208	0.0575568	-0.000619263	0.0201754	0.0127251	0.019552	-0.0134253	-0.0197061	-0.0345057	0.162824	0.0757155	-0.0150338	0.0209142	0.0269295	0.0151122	0.00421533	0.0151122	0.00421533	0.040528	-0.00429439	0.0637529	-0.0630372	-0.0260713	-0.0385461	-0.00368233
22	0.0191529	0.0646596	0.000231725	0.0268827	-0.0487617	0.0191529	-0.0222496	-0.011286	0.0540663	-0.0206407	-0.0509137	-0.00653847	0.0194496	-0.00673602	0.0486252	-0.0890001	-0.000830835	0.0269295	0.0191188	0.00770146	0.0191529	0.0646596	-0.0198959	0.0268827	-0.0487617	0.0191529	-0.0222496	0.0540663	-0.0206407	-0.0509137	-0.00653847	0.0194496	-0.00673602	0.078349	0.138183	-0.0113713	-0.0129731	-0.00358006	0.0191188	0.00770146	0.0191188	0.00770146	0.0516867	-0.00323149	-0.0295469	-0.0557721	-0.0287088	-0.00928736	-0.00355783
23	-0.0274772	-0.000521552	-0.0198959	-0.0098043	-0.0201259	-0.0274772	-0.0360078	-0.00418419	-0.00847342	0.0202391	-0.000120106	0.0167115	-0.0272034	-0.000698786	0.0757155	-0.0863793	0.00770135	-0.00358006	0.0111778	0.00664752	-0.0274772	-0.000521552	-0.027827	-0.0098043	-0.0201259	-0.0274772	-0.0360078	-0.00847342	0.0202391	-0.000120106	0.0167115	-0.0272034	-0.000698786	0.12605	0.103085	0.00703552	-0.0261964	-0.0438826	0.0111778	0.00664752	0.0111778	0.00664752	0.0722494	-0.00513607	-0.0268469	0.0379842	-0.0162135	-0.0478685	-0.00516619
24	-0.0940661	0.0935849	-0.027827	-0.0354544	-0.0605524	-0.0940661	0.0637969	0.0304388	-0.0451104	0.0265124	0.0155936	0.00976718	0.020387	0.00429486	0.138183	-0.102315	0.0189378	-0.0438826	0.0105628	-0.000320358	-0.0940661	0.0935849	0.0579991	-0.0354544	-0.0605524	-0.0940661	0.0637969	-0.0451104	0.0265124	0.0155936	0.00976718	0.020387	0.00429486	0.124712	0.162824	0.00280935	0.00220358	0.0601503	0.0105628	-0.000320358	0.0105628	-0.000320358	0.0817321	0.00084513	-0.125195	0.0286491	-0.0606054	-0.00287078	-6.69e-05
25	-0.0503244	-0.00413259	0.0579991	0.0609187	-0.0576303	-0.0503244	-0.0430323	0.0424826	-0.0553414	1.44e-05	-0.0317184	0.0149337	0.00801981	-0.0071385	0.103085	-0.0954314	0.0803893	0.0601503	0.0306657	0.0190232	-0.0503244	-0.00413259	-0.0489764	0.0609187	-0.0576303	-0.0503244	-0.0430323	-0.0553414	1.44e-05	-0.0317184	0.0149337	0.00801981	-0.0071385	0.130603	0.078349	-0.00204248	0.0528959	0.026303	0.0306657	0.0190232	0.0306657	0.0190232	0.0483458	0.00041649	-0.0604535	-0.0125575	0.039878	0.0154434	0.000127617
26	0.00357922	-0.0451071	-0.0489764	0.0824376	0.00677374	0.00357922	-0.0809144	-0.00172529	-0.0592696	-0.0159578	-0.0862576	-0.014906	0.0124253	0.0189656	0.162824	-0.0865751	0.0133977	0.026303	0.0468155	0.0275818	0.00357922	-0.0451071	-0.0391611	0.0824376	0.00677374	0.00357922	-0.0809144	-0.0592696	-0.0159578	-0.0862576	-0.014906	0.0124253	0.0189656	0.200793	0.12605	0.0420814	0.00165335	0.0682451	0.0468155	0.0275818	0.0468155	0.0275818	0.029568	0.00401721	-4.19e-05	-0.0289791	-0.0496151	-0.0718193	0.00307569
27	-0.0941655	-0.0808408	-0.0391611	-0.0341907	-0.0551456	-0.0941655	-0.068336	0.0068262	-0.105655	-0.0142755	-0.0163406	0.00633431	-0.0381601	-0.012323	0.078349	-0.0429869	0.0198174	0.0682451	0.023512	0.0071471	-0.0941655	-0.0808408	0.0043285	-0.0341907	-0.0551456	-0.0941655	-0.068336	-0.105655	-0.0142755	-0.0163406	0.00633431	-0.0381601	-0.012323	0.172074	0.124712	0.0248344	0.0198004	-0.00918376	0.023512	0.0071471	0.023512	0.0071471	0.0687791	-0.00819554	-0.0892589	0.0513593	-0.0213925	-0.0699774	-0.00908477
28	0.00118057	0.0211037	0.0043285	-0.0987463	0.126108	0.00118057	-0.0407767	0.0390639	-0.00971745	-0.00760457	0.0526317	0.0277825	-0.025895	0.0108125	0.12605	-0.00848083	0.029525	-0.00918376	0.0403956	0.0217621	0.00118057	0.0211037	0.0499743	-0.0987463	0.126108	0.00118057	-0.0407767	-0.00971745	-0.00760457	0.0526317	0.0277825	-0.025895	0.0108125	0.212588	0.130603	-0.018593	0.0295568	0.054439	0.0403956	0.0217621	0.0403956	0.0217621	0.0412254	0.00407485	-0.0551451	0.0397731	0.0256778	-0.0109309	0.00366169
29	0.00340469	-0.116405	0.0499743	-0.0686821	-0.00502521	0.00340469	0.02067	0.00724255	-0.134201	0.0100404	0.00760779	-0.0234795	-0.0264788	-0.00379138	0.124712	0.0438431	0.0212805	0.054439	0.0325898	0.0440615	0.00340469	-0.116405	0.0148657	-0.0686821	-0.00502521	0.00340469	0.02067	-0.134201	0.0100404	0.00760779	-0.0234795	-0.0264788	-0.00379138	0.122168	0.200793	0.0319558	0.0276153	-0.00743658	0.0325898	0.0440615	0.0325898	0.0440615	0.0969797	0.000391071	0.0280638	0.00886643	-0.0195225	-0.0457893	-0.000138286
30	-0.0661392	0.0020453	0.0148657	-0.0407912	-0.0586074	-0.0661392	0.0924209	-0.035628	0.0413678	0.0301957	0.0498429	-0.0163196	-0.0262432	-0.0562986	0.130603	0.0985016	-0.0107028	-0.00743658	0.0131485	0.0335593	-0.0661392	0.0020453	0.0943919	-0.0407912	-0.0586074	-0.0661392	0.0924209	0.0413678	0.0301957	0.0498429	-0.0163196	-0.0262432	-0.0562986	0.205686	0.172074	0.0205315	0.0111697	0.0512921	0.0131485	0.0335593	0.0131485	0.0335593	0.0611694	0.00470508	0.0818358	0.0198452	-0.0091456	0.0411545	0.00491636
31	0.0700094	0.0428665	0.0943919	0.0173925	0.011697	0.0700094	-0.027422	-0.0516686	-0.119538	-0.0278358	0.00126234	-0.00867466	0.000853105	-0.0266056	0.200793	0.157302	-0.00439002	0.0512921	0.0469995	0.0383601	0.0700094	0.0428665	0.081286	0.0173925	0.011697	0.0700094	-0.027422	-0.119538	-0.0278358	0.00126234	-0.00867466	0.000853105	-0.0266056	0.30123	0.212588	-2.38e-05	0.0311478	0.00574311	0.0469995	0.0383601	0.0469995	0.0383601	0.123058	0.00663503	-0.0595238	-0.100144	-0.0304262	0.00994098	0.00493147
32	0.019651	0.00604229	0.081286	0.0319126	0.0692534	0.019651	-0.0395771	0.00401995	-0.0153001	-0.00736546	-0.0414495	-0.00783993	0.0420313	0.0336697	0.172074	0.12998	-0.0302167	0.00574311	0.0411923	0.0483145	0.019651	0.00604229	-0.047889	0.0319126	0.0692534	0.019651	-0.0395771	-0.0153001	-0.00736546	-0.0414495	-0.00783993	0.0420313	0.0336697	0.287426	0.122168	0.0204754	0.0149005	0.0288186	0.0411923	0.0483145	0.0411923	0.0483145	0.116725	0.00971083	0.102283	0.0252166	-0.00286096	0.0515836	0.00990898
33	0.0727741	-0.0530839	-0.047889	-0.0745996	0.0112415	0.0727741	-0.0141089	-0.00899376	-0.0528017	-0.00988416	-0.052803	-0.00799806	-0.00606914	0.00918987	0.212588	0.201764	-0.0288276	0.0288186	0.0438245	0.0522082	0.0727741	-0.0530839	-0.0188928	-0.0745996	0.0112415	0.0727741	-0.0141089	-0.0528017	-0.00988416	-0.052803	-0.00799806	-0.00606914	0.00918987	0.2973	0.205686	0.00467158	0.0332086	0.0205329	0.0438245	0.0522082	0.0438245	0.0522082	0.113793	0.00646045	0.0355979	0.0158648	0.0234807	0.0102425	0.00628466
34	0.0290493	-0.0605531	-0.0188928	0.0637752	0.0645109	0.0290493	0.0100259	0.0078354	-0.0412028	0.014444	0.0360244	0.00306245	0.0257651	0.043307	0.122168	0.203285	0.0571847	0.0205329	0.0782067	0.0669284	0.0290493	-0.0605531	0.01975	0.0637752	0.0645109	0.0290493	0.0100259	-0.0412028	0.014444	0.0360244	0.00306245	0.0257651	0.043307	0.314029	0.30123	-0.016114	0.0773906	0.0373734	0.0782067	0.0669284	0.0782067	0.0669284	0.119687	0.0184734	-0.086033	0.0290922	0.0494796	-0.00799393	0.0161641
35	-0.0124599	0.0352122	0.01975	0.0240603	0.0289985	-0.0124599	-0.00497471	0.0157454	-0.0828882	-0.0122191	0.00770676	0.0213692	0.0411432	0.0486427	0.205686	0.206343	0.00309824	0.0373734	0.0430185	0.0650024	-0.0124599	0.0352122	0.0104596	0.0240603	0.0289985	-0.0124599	-0.00497471	-0.0828882	-0.0122191	0.00770676	0.0213692	0.0411432	0.0486427	0.353389	0.287426	-0.0220164	0.0524322	0.0857413	0.0430185	0.0650024	0.0430185	0.0650024	0.179172	0.0168344	-0.00741639	0.00169178	-0.0984752	0.0204868	0.0152909
36	0.0244411	0.0253756	0.0104596	0.0181999	-0.00033963	0.0244411	0.0542702	-0.0132742	0.135968	0.0173406	0.0623089	0.00537594	0.0138024	0.0346035	0.30123	0.175105	0.0489977	0.0857413	0.073245	0.0734778	0.0244411	0.0253756	0.0427463	0.0181999	-0.00033963	0.0244411	0.0542702	0.135968	0.0173406	0.0623089	0.00537594	0.0138024	0.0346035	0.423287	0.2973	-0.00399915	0.051281	0.0270959	0.073245	0.0734778	0.073245	0.0734778	0.189324	0.0227951	-0.0885733	-0.0500481	-0.0574458	-0.00365656	0.0193397
37	0.0392184	-0.0542206	0.0427463	0.0469332	-0.00594533	0.0392184	0.07619	-0.025568	-0.011106	0.0194392	0.019558	-0.0219097	0.0237549	-0.0232648	0.287426	0.123248	0.0305771	0.0270959	0.0676055	0.0658087	0.0392184	-0.0542206	0.0707675	0.0469332	-0.00594533	0.0392184	0.07619	-0.011106	0.0194392	0.019558	-0.0219097	0.0237549	-0.0232648	0.479668	0.314029	-0.00445659	0.0940226	0.0851687	0.0676055	0.0658087	0.0676055	0.0658087	0.248849	0.0197016	0.00864971	0.0231585	0.0263887	0.0064458	0.018212
38	0.0570501	0.183372	0.0707675	0.0455902	0.00574965	0.0570501	0.0985144	-0.00115695	-0.0263235	0.0328185	0.111483	0.0382613	0.0850016	-0.0314306	0.2973	0.163025	0.109339	0.0851687	0.0682554	0.0728116	0.0570501	0.183372	0.105407	0.0455902	0.00574965	0.0570501	0.0985144	-0.0263235	0.0328185	0.111483	0.0382613	0.0850016	-0.0314306	0.555945	0.353389	0.010394	0.0345446	0.0854134	0.0682554	0.0728116	0.0682554	0.0728116	0.301971	0.0390996	-0.0558448	0.03711	0.0299494	0.0428913	0.0366112
39	0.0726492	0.113995	0.105407	0.039127	-0.0256086	0.0726492	0.0234114	-0.00820027	0.0581907	0.0535008	0.0416052	-0.00787634	0.0526626	-0.00597082	0.314029	0.137089	0.128993	0.0854134	0.0695948	0.088027	0.0726492	0.113995	0.310237	0.039127	-0.0256086	0.0726492	0.0234114	0.0581907	0.0535008	0.0416052	-0.00787634	0.0526626	-0.00597082	0.64382	0.423287	0.0325991	0.0314446	0.0551486	0.0695948	0.088027	0.0695948	0.088027	0.386336	0.0383596	-0.000549028	-0.0215663	0.0358644	0.0453732	0.0364233
40	0.0335569	0.123693	0.310237	0.0126925	0.0285999	0.0335569	-0.0477704	0.00223725	0.093883	-0.00685628	-0.00704133	0.0643068	0.0694354	-0.0234096	0.353389	0.507273	0.289239	0.0551486	0.0789404	0.1434	0.0335569	0.123693	0.539075	0.0126925	0.0285999	0.0335569	-0.0477704	0.093883	-0.00685628	-0.00704133	0.0643068	0.0694354	-0.0234096	0.701781	0.479668	0.0951152	0.0835534	0.0736579	0.0789404	0.1434	0.0789404	0.1434	0.567872	0.0496691	0.0660491	0.221931	0.295202	0.0709714	0.0525814
41	-0.0589409	0.0179381	0.539075	0.145946	0.0206514	-0.0589409	0.105931	-0.0188973	0.369655	0.024772	0.0362313	0.0201415	0.0875183	0.00541003	0.423287	0.917385	0.675159	0.0736579	0.102032	0.240205	-0.0589409	0.0179381	0.838102	0.145946	0.0206514	-0.0589409	0.105931	0.369655	0.024772	0.0362313	0.0201415	0.0875183	0.00541003	0.859032	0.555945	0.180645	0.137772	0.0579382	0.102032	0.240205	0.102032	0.240205	0.791699	0.0908304	4.82344	2.49216	2.2132	1.27033	0.167184
42	0.103557	0.264261	0.838102	0.202968	0.135764	0.103557	0.158317	0.0166071	0.772525	0.036937	0.108631	0.0930856	0.182068	0.0869262	0.479668	1.44749	1.1933	0.0579382	0.154078	0.361957	0.103557	0.264261	0.918631	0.202968	0.135764	0.103557	0.158317	0.772525	0.036937	0.108631	0.0930856	0.182068	0.0869262	0.913682	0.64382	0.253901	0.159409	0.155433	0.154078	0.361957	0.154078	0.361957	1.01939	0.142359	5.37439	4.00264	2.51324	1.89511	0.246414
43	0.485959	0.361718	0.918631	0.211515	0.293096	0.485959	0.329698	0.141179	0.851003	0.0788651	0.28622	0.263346	0.261464	0.185946	0.555945	1.7676	2.08587	0.155433	0.205509	0.492365	0.485959	0.361718	1.01558	0.211515	0.293096	0.485959	0.329698	0.851003	0.0788651	0.28622	0.263346	0.261464	0.185946	1.08407	0.701781	0.357099	0.23587	0.479537	0.205509	0.492365	0.205509	0.492365	1.17413	0.214445	5.52994	4.48393	2.60043	2.00002	0.335502
44	1.27525	0.519867	1.01558	0.387236	0.866991	1.27525	0.760317	0.2171	1.3025	0.238169	0.615539	0.43011	0.477742	0.551055	0.64382	1.87551	3.03482	0.479537	0.313321	0.741303	1.27525	0.519867	1.12816	0.387236	0.866991	1.27525	0.760317	1.3025	0.238169	0.615539	0.43011	0.477742	0.551055	1.13024	0.859032	0.488122	0.284887	1.74226	0.313321	0.741303	0.313321	0.741303	1.35755	0.351939	5.77685	4.88204	2.60993	1.97478	0.476765
45	1.764	0.793194	1.12816	0.608954	1.37889	1.764	1.32137	0.285978	1.56871	0.447645	1.05352	0.617516	0.73692	0.951176	0.701781	1.89333	4.04646	1.74226	0.519402	1.02973	1.764	0.793194	1.28001	0.608954	1.37889	1.764	1.32137	1.56871	0.447645	1.05352	0.617516	0.73692	0.951176	1.23393	0.913682	0.565153	0.397766	3.78556	0.519402	1.02973	0.519402	1.02973	1.50496	0.491666	5.49292	4.84671	2.58607	1.97292	0.609477
46	2.00805	1.00467	1.28001	0.891199	1.6982	2.00805	2.08634	0.402791	1.81527	0.696606	1.55651	0.782661	1.02329	1.2663	0.859032	1.8409	4.78432	3.78556	0.674069	1.35489	2.00805	1.00467	1.5842	0.891199	1.6982	2.00805	2.08634	1.81527	0.696606	1.55651	0.782661	1.02329	1.2663	1.45557	1.08407	0.655404	0.401014	5.2178	0.674069	1.35489	0.674069	1.35489	1.70814	0.627577	5.54231	4.79288	2.58058	2.01278	0.739558
47	2.06759	1.29512	1.5842	1.09285	1.89815	2.06759	2.55281	0.403021	1.73709	0.900924	1.92782	0.89108	1.20037	1.41921	0.913682	1.86878	5.37614	5.2178	0.923821	1.70183	2.06759	1.29512	1.60696	1.09285	1.89815	2.06759	2.55281	1.73709	0.900924	1.92782	0.89108	1.20037	1.41921	1.73396	1.13024	0.70801	0.453736	5.98877	0.923821	1.70183	0.923821	1.70183	1.82648	0.71988	5.24162	4.99167	2.5537	2.02236	0.82649
48	2.16524	1.48715	1.60696	1.31494	1.92278	2.16524	2.97524	0.434558	1.92242	1.07671	2.36171	1.03235	1.34768	1.53765	1.08407	1.90042	5.39915	5.98877	1.1016	2.01327	2.16524	1.48715	1.87274	1.31494	1.92278	2.16524	2.97524	1.92242	1.07671	2.36171	1.03235	1.34768	1.53765	2.11659	1.23393	0.741639	0.481356	6.14461	1.1016	2.01327	1.1016	2.01327	1.93984	0.79166	5.32346	4.85734	2.54903	1.93318	0.893298
49	2.1572	1.61662	1.87274	1.54016	1.96245	2.1572	3.2046	0.421314	2.01673	1.2462	2.58366	1.06847	1.50236	1.64268	1.13024	1.84086	5.59532	6.14461	1.35716	2.16962	2.1572	1.61662	2.17795	1.54016	1.96245	2.1572	3.2046	2.01673	1.2462	2.58366	1.06847	1.50236	1.64268	2.42634	1.45557	0.809317	0.502807	6.11082	1.35716	2.16962	1.35716	2.16962	2.01889	0.842716	5.2512	4.91513	2.5374	1.90887	0.941539
50	2.14698	1.90086	2.17795	1.64489	2.01283	2.14698	3.32539	0.462544	2.01079	1.3246	2.71152	1.14141	1.6511	1.73642	1.23393	1.79907	5.44756	6.11082	1.35528	2.24004	2.14698	1.90086	2.34227	1.64489	2.01283	2.14698	3.32539	2.01079	1.3246	2.71152	1.14141	1.6511	1.73642	2.67621	1.73396	0.773979	0.554657	6.02103	1.35528	2.24004	1.35528	2.24004	2.12899	0.866928	5.42389	4.82891	2.62509	2.01432	0.967078
51	2.13882	2.06844	2.34227	1.68645	1.99592	2.13882	3.44761	0.449707	2.1368	1.388	2.88951	1.2129	1.78755	1.89197	1.45557	1.77868	5.75116	6.02103	1.40636	2.31197	2.13882	2.06844	2.55939	1.68645	1.99592	2.13882	3.44761	2.1368	1.388	2.88951	1.2129	1.78755	1.89197	2.78954	2.11659	0.824189	0.499102	5.9895	1.40636	2.31197	1.40636	2.31197	2.19541	0.900682	5.25558	4.87146	2.57743	1.95964	0.998945
52	2.16685	2.09995	2.55939	1.81118	1.99135	2.16685	3.44711	0.466331	2.27972	1.44534	2.96844	1.22281	1.847	1.91852	1.73396	1.72643	5.83894	5.9895	1.41016	2.32535	2.16685	2.09995	2.898	1.81118	1.99135	2.16685	3.44711	2.27972	1.44534	2.96844	1.22281	1.847	1.91852	2.80354	2.42634	0.854468	0.556519	5.89482	1.41016	2.32535	1.41016	2.32535	2.29207	0.927666	5.36903	4.97425	2.59411	1.91897	1.02503
53	2.16295	2.27199	2.898	1.82316	2.00505	2.16295	3.4842	0.485358	2.23535	1.48359	3.10122	1.27602	1.92548	2.03613	2.11659	1.76466	6.16798	5.89482	1.46107	2.33153	2.16295	2.27199	2.97832	1.82316	2.00505	2.16295	3.4842	2.23535	1.48359	3.10122	1.27602	1.92548	2.03613	3.01856	2.67621	0.827978	0.557156	5.96031	1.46107	2.33153	1.46107	2.33153	2.33424	0.958261	5.00485	4.88946	2.61342	1.9887	1.0529
54	1.99676	2.31675	2.97832	1.91029	1.96869	1.99676	3.48615	0.453498	2.37807	1.50788	3.14803	1.28727	2.02949	2.10557	2.42634	1.72387	6.61484	5.96031	1.41125	2.32711	1.99676	2.31675	3.17909	1.91029	1.96869	1.99676	3.48615	2.37807	1.50788	3.14803	1.28727	2.02949	2.10557	3.03054	2.78954	0.851482	0.537072	5.99779	1.41125	2.32711	1.41125	2.32711	2.42425	0.983798	5.10651	4.8687	2.56799	1.98866	1.07934
55	1.98332	2.41665	3.17909	1.97329	2.00985	1.98332	3.49032	0.48576	2.27356	1.5049	3.20964	1.33873	2.13628	2.18835	2.67621	1.62391	7.13826	5.99779	1.39502	2.26831	1.98332	2.41665	3.19554	1.97329	2.00985	1.98332	3.49032	2.27356	1.5049	3.20964	1.33873	2.13628	2.18835	3.0549	2.80354	0.881767	0.600677	5.97873	1.39502	2.26831	1.39502	2.26831	2.49734	1.00476	5.15277	4.87686	2.52984	2.00247	1.09847
56	1.97964	2.40924	3.19554	1.9008	1.96901	1.97964	3.49032	0.440862	2.38712	1.56629	3.37857	1.3522	2.16889	2.27451	2.78954	1.60937	7.51169	5.97873	1.40636	2.30649	1.97964	2.40924	3.24266	1.9008	1.96901	1.97964	3.49032	2.38712	1.56629	3.37857	1.3522	2.16889	2.27451	3.26891	3.01856	0.941205	0.595517	5.91366	1.40636	2.30649	1.40636	2.30649	2.48074	1.0203	5.08303	4.97377	2.48613	1.92013	1.11445
57	1.89086	2.34966	3.24266	2.01891	1.97362	1.89086	3.49032	0.449702	2.55447	1.50292	3.44689	1.361	2.26162	2.38042	2.80354	1.59248	7.97099	5.91366	1.38511	2.25336	1.89086	2.34966	3.3309	2.01891	1.97362	1.89086	3.49032	2.55447	1.50292	3.44689	1.361	2.26162	2.38042	3.10241	3.03054	1.01359	0.634961	5.84575	1.38511	2.25336	1.38511	2.25336	2.55666	1.04267	5.26924	4.77076	2.54981	1.94777	1.14317
58	1.82738	2.39937	3.3309	1.94538	1.93888	1.82738	3.49032	0.437786	2.44481	1.50452	3.51338	1.36261	2.29821	2.41623	3.01856	1.59945	8.08545	5.84575	1.37204	2.30576	1.82738	2.39937	3.41328	1.94538	1.93888	1.82738	3.49032	2.44481	1.50452	3.51338	1.36261	2.29821	2.41623	3.05116	3.0549	1.09712	0.648672	5.79746	1.37204	2.30576	1.37204	2.30576	2.58742	1.0584	5.27196	4.77449	2.57912	1.97259	1.17046
59	1.78221	2.25766	3.41328	1.91129	1.91241	1.78221	3.49032	0.427799	2.4977	1.47028	3.60218	1.38873	2.2966	2.47633	3.03054	1.56389	8.33499	5.79746	1.40185	2.28291	1.78221	2.25766	3.4572	1.91129	1.91241	1.78221	3.49032	2.4977	1.47028	3.60218	1.38873	2.2966	2.47633	3.14244	3.26891	1.20213	0.65325	5.7877	1.40185	2.28291	1.40185	2.28291	2.59402	1.07314	5.19836	4.81192	2.54473	1.96949	1.19385
60	1.62533	2.17488	3.4572	1.82693	1.87677	1.62533	3.48081	0.4045	2.57495	1.50583	3.79634	1.40373	2.29762	2.48382	3.0549	1.55625	8.39292	5.7877	1.44081	2.26992	1.62533	2.17488	3.48252	1.82693	1.87677	1.62533	3.48081	2.57495	1.50583	3.79634	1.40373	2.29762	2.48382	3.07005	3.10241	1.21629	0.741183	5.72927	1.44081	2.26992	1.44081	2.26992	2.60639	1.08202	5.13355	4.63934	2.61282	1.95563	1.20489
61	1.5762	2.23725	3.48252	1.73767	1.84516	1.5762	3.47343	0.374697	2.73949	1.4817	3.89696	1.41546	2.3758	2.5551	3.26891	1.52431	8.55487	5.72927	1.47578	2.27422	1.5762	2.23725	3.58373	1.73767	1.84516	1.5762	3.47343	2.73949	1.4817	3.89696	1.41546	2.3758	2.5551	3.20448	3.05116	1.22841	0.689514	5.6113	1.47578	2.27422	1.47578	2.27422	2.66827	1.0928	5.14222	4.83447	2.54982	2.02418	1.22142
62	1.46521	2.12247	3.58373	1.68939	1.87861	1.46521	3.48626	0.364946	2.67205	1.48527	4.00265	1.43745	2.38258	2.55079	3.10241	1.49855	8.41136	5.6113	1.48126	2.31086	1.46521	2.12247	3.63519	1.68939	1.87861	1.46521	3.48626	2.67205	1.48527	4.00265	1.43745	2.38258	2.55079	3.02091	3.14244	1.27253	0.682008	5.44413	1.48126	2.31086	1.48126	2.31086	2.66575	1.09951	5.06677	4.80016	2.56529	1.98408	1.23213
63	1.30886	2.13072	3.63519	1.50395	1.68413	1.30886	3.43214	0.278925	2.57969	1.49227	4.17	1.42552	2.39645	2.52241	3.05116	1.4759	8.51868	5.44413	1.50873	2.35608	1.30886	2.13072	3.5922	1.50395	1.68413	1.30886	3.43214	2.57969	1.49227	4.17	1.42552	2.39645	2.52241	2.85872	3.07005	1.22832	0.667208	5.3051	1.50873	2.35608	1.50873	2.35608	2.6713	1.09643	4.91588	4.89369	2.53347	1.93756	1.2285
64	1.19007	2.14769	3.5922	1.44152	1.70959	1.19007	3.44208	0.214749	2.77236	1.53848	4.42885	1.44726	2.39809	2.53167	3.14244	1.44986	8.81977	5.3051	1.50325	2.31921	1.19007	2.14769	3.56738	1.44152	1.70959	1.19007	3.44208	2.77236	1.53848	4.42885	1.44726	2.39809	2.53167	2.84832	3.20448	1.28021	0.66688	5.27429	1.50325	2.31921	1.50325	2.31921	2.67159	1.11232	4.90894	4.7589	2.53287	1.94709	1.24317
65	1.03257	2.09059	3.56738	1.32634	1.59009	1.03257	3.40355	0.195863	2.64087	1.45253	4.48721	1.44021	2.44406	2.54612	3.07005	1.39499	8.60081	5.27429	1.53235	2.33198	1.03257	2.09059	3.58251	1.32634	1.59009	1.03257	3.40355	2.64087	1.45253	4.48721	1.44021	2.44406	2.54612	2.94794	3.02091	1.26493	0.664796	5.25813	1.53235	2.33198	1.53235	2.33198	2.73102	1.09901	4.90617	4.81416	2.54475	1.93231	1.23185
66	0.923984	2.01949	3.58251	1.25386	1.54752	0.923984	3.38772	0.144925	2.79107	1.45792	4.60181	1.39227	2.48718	2.60744	3.20448	1.37357	8.7594	5.25813	1.54506	2.33921	0.923984	2.01949	3.58663	1.25386	1.54752	0.923984	3.38772	2.79107	1.45792	4.60181	1.39227	2.48718	2.60744	2.96276	2.85872	1.2577	0.625265	5.15126	1.54506	2.33921	1.54506	2.33921	2.73871	1.10381	4.77048	4.76395	2.53167	1.92611	1.23647
67	0.768143	2.1495	3.58663	1.10195	1.51817	0.768143	3.36763	0.135624	2.67712	1.38569	4.66571	1.42126	2.51303	2.6144	3.02091	1.41749	8.72594	5.15126	1.48491	2.36098	0.768143	2.1495	3.61474	1.10195	1.51817	0.768143	3.36763	2.67712	1.38569	4.66571	1.42126	2.51303	2.6144	2.83207	2.84832	1.23361	0.630314	5.00296	1.48491	2.36098	1.48491	2.36098	2.73989	1.09061	4.8004	4.97658	2.5535	1.94449	1.22776
68	0.723413	2.18442	3.61474	0.998723	1.48193	0.723413	3.39077	0.113055	2.60897	1.38907	4.82448	1.43516	2.46457	2.57335	2.85872	1.35033	8.82287	5.00296	1.48091	2.35919	0.723413	2.18442	3.58972	0.998723	1.48193	0.723413	3.39077	2.60897	1.38907	4.82448	1.43516	2.46457	2.57335	2.81922	2.94794	1.25642	0.581923	4.99	1.48091	2.35919	1.48091	2.35919	2.78905	1.0931	5.18618	4.71689	2.61186	1.93674	1.23082
69	0.633913	2.00314	3.58972	1.01847	1.43005	0.633913	3.35309	0.0389952	2.56444	1.39886	4.95	1.38379	2.44979	2.57866	2.84832	1.37384	8.74675	4.99	1.48398	2.33884	0.633913	2.00314	3.61136	1.01847	1.43005	0.633913	3.35309	2.56444	1.39886	4.95	1.38379	2.44979	2.57866	2.91337	2.96276	1.18237	0.601909	4.76301	1.48398	2.33884	1.48398	2.33884	2.80627	1.07938	5.08386	4.78109	2.56879	1.95687	1.21777
70	0.603021	2.18734	3.61136	0.869976	1.39824	0.603021	3.36613	0.0248305	2.55183	1.35366	4.97354	1.40463	2.50441	2.5905	2.94794	1.31599	8.82462	4.76301	1.52567	2.32609	0.603021	2.18734	3.59666	0.869976	1.39824	0.603021	3.36613	2.55183	1.35366	4.97354	1.40463	2.50441	2.5905	2.88581	2.83207	1.16209	0.577642	4.71727	1.52567	2.32609	1.52567	2.32609	2.85303	1.07911	5.00527	4.74623	2.52455	1.9367	1.21531
71	0.549434	2.15609	3.59666	0.879114	1.36833	0.549434	3.31275	-0.0155762	2.42317	1.31899	5.02124	1.36643	2.55348	2.63334	2.96276	1.36218	8.74222	4.71727	1.50754	2.34766	0.549434	2.15609	3.57269	0.879114	1.36833	0.549434	3.31275	2.42317	1.31899	5.02124	1.36643	2.55348	2.63334	2.86543	2.81922	1.17173	0.569018	4.6756	1.50754	2.34766	1.50754	2.34766	2.8215	1.07867	4.84322	4.8017	2.57076	1.91059	1.21552
72	0.446336	2.02841	3.57269	0.821135	1.34829	0.446336	3.31955	0.00840827	2.42652	1.31501	5.12058	1.33514	2.48135	2.62721	2.83207	1.39669	8.90497	4.6756	1.51563	2.33216	0.446336	2.02841	3.59203	0.821135	1.34829	0.446336	3.31955	2.42652	1.31501	5.12058	1.33514	2.48135	2.62721	2.77727	2.91337	1.13081	0.552688	4.48722	1.51563	2.33216	1.51563	2.33216	2.82151	1.07135	4.99928	4.70705	2.5135	1.9592	1.20773
73	0.406246	2.04296	3.59203	0.686027	1.32024	0.406246	3.30544	-0.0220267	2.30127	1.3069	5.13134	1.34323	2.50253	2.61685	2.81922	1.35955	8.70209	4.48722	1.52419	2.31258	0.406246	2.04296	3.56656	0.686027	1.32024	0.406246	3.30544	2.30127	1.3069	5.13134	1.34323	2.50253	2.61685	2.9058	2.88581	1.14363	0.572588	4.60268	1.52419	2.31258	1.52419	2.31258	2.76152	1.06244	5.00308	4.7652	2.52993	2.00422	1.20135
74	0.35832	2.1243	3.56656	0.631497	1.1652	0.35832	3.26724	-0.0526774	2.33405	1.24953	5.16319	1.34251	2.475	2.61138	2.91337	1.26419	8.73883	4.60268	1.50115	2.36519	0.35832	2.1243	3.57465	0.631497	1.1652	0.35832	3.26724	2.33405	1.24953	5.16319	1.34251	2.475	2.61138	2.84108	2.86543	1.10953	0.51298	4.44148	1.50115	2.36519	1.50115	2.36519	2.84603	1.05224	4.86858	4.73956	2.55424	1.94668	1.1894
75	0.247335	2.09257	3.57465	0.623223	1.22716	0.247335	3.27608	-0.0276935	2.41742	1.24621	5.23088	1.3647	2.53119	2.59907	2.88581	1.27471	8.78159	4.44148	1.49445	2.30964	0.247335	2.09257	3.54762	0.623223	1.22716	0.247335	3.27608	2.41742	1.24621	5.23088	1.3647	2.53119	2.59907	2.70272	2.77727	1.10297	0.534412	4.30138	1.49445	2.30964	1.49445	2.30964	2.80719	1.04669	4.75385	4.86875	2.59885	1.93526	1.18578
76	0.240909	2.08085	3.54762	0.606825	1.16122	0.240909	3.22395	-0.0778276	2.3342	1.20776	5.26073	1.3059	2.4709	2.5737	2.86543	1.30212	8.53192	4.30138	1.42257	2.31703	0.240909	2.08085	3.50125	0.606825	1.16122	0.240909	3.22395	2.3342	1.20776	5.26073	1.3059	2.4709	2.5737	2.81303	2.9058	1.05204	0.515312	4.20069	1.42257	2.31703	1.42257	2.31703	2.81243	1.03113	4.88394	4.74095	2.55676	1.95847	1.17353
77	0.187272	2.10576	3.50125	0.451348	1.14558	0.187272	3.24371	-0.064447	2.30305	1.18578	5.33938	1.33647	2.49072	2.56333	2.77727	1.28109	8.62713	4.20069	1.4616	2.29813	0.187272	2.10576	3.46226	0.451348	1.14558	0.187272	3.24371	2.30305	1.18578	5.33938	1.33647	2.49072	2.56333	2.80848	2.84108	1.05508	0.510666	4.23431	1.4616	2.29813	1.4616	2.29813	2.77614	1.03868	4.99858	4.76577	2.53871	1.94084	1.17803
78	0.178729	1.9754	3.46226	0.460167	1.13098	0.178729	3.17824	-0.128305	2.25251	1.1473	5.31922	1.26963	2.46088	2.55488	2.9058	1.28671	8.54117	4.23431	1.46623	2.34822	0.178729	1.9754	3.53351	0.460167	1.13098	0.178729	3.17824	2.25251	1.1473	5.31922	1.26963	2.46088	2.55488	2.75713	2.70272	1.05691	0.479617	4.1045	1.46623	2.34822	1.46623	2.34822	2.80355	1.01503	4.95408	4.90398	2.56429	1.97281	1.16107
79	0.118226	2.08031	3.53351	0.363328	1.15769	0.118226	3.25327	-0.110438	2.19005	1.1315	5.40378	1.29926	2.45643	2.59841	2.84108	1.27044	8.40799	4.1045	1.43848	2.30964	0.118226	2.08031	3.50407	0.363328	1.15769	0.118226	3.25327	2.19005	1.1315	5.40378	1.29926	2.45643	2.59841	2.88427	2.81303	1.05095	0.477768	4.03489	1.43848	2.30964	1.43848	2.30964	2.78632	1.01106	4.98696	4.7876	2.57123	1.97385	1.15421
80	0.0648133	1.9608	3.50407	0.339317	1.09515	0.0648133	3.17087	-0.125444	2.09329	1.09887	5.41447	1.26549	2.39957	2.58651	2.70272	1.26931	8.30234	4.03489	1.46114	2.28083	0.0648133	1.9608	3.50815	0.339317	1.09515	0.0648133	3.17087	2.09329	1.09887	5.41447	1.26549	2.39957	2.58651	2.77564	2.80848	1.03855	0.484548	3.86554	1.46114	2.28083	1.46114	2.28083	2.80332	0.997224	4.58559	4.7512	2.5498	1.91003	1.13612
81	0.018182	2.0741	3.50815	0.305805	1.08462	0.018182	3.12728	-0.157765	2.14649	1.078	5.44593	1.27717	2.45247	2.54198	2.81303	1.2497	8.48624	3.86554	1.46738	2.34182	0.018182	2.0741	3.40198	0.305805	1.08462	0.018182	3.12728	2.14649	1.078	5.44593	1.27717	2.45247	2.54198	2.69706	2.75713	1.01845	0.441269	3.74174	1.46738	2.34182	1.46738	2.34182	2.87488	1.00328	4.58948	4.69872	2.58832	1.91287	1.14367
82	0.0190038	2.052	3.40198	0.268344	1.01929	0.0190038	3.08281	-0.179281	2.19282	1.07228	5.43042	1.23866	2.44208	2.50107	2.80848	1.19188	8.40388	3.74174	1.42009	2.34579	0.0190038	2.052	3.49451	0.268344	1.01929	0.0190038	3.08281	2.19282	1.07228	5.43042	1.23866	2.44208	2.50107	2.56873	2.88427	0.990066	0.458779	3.84541	1.42009	2.34579	1.42009	2.34579	2.87081	0.994059	4.77953	4.75236	2.60877	1.95	1.13821
83	-0.0767483	1.89457	3.49451	0.177706	0.993127	-0.0767483	3.0767	-0.178978	1.9713	1.04346	5.50716	1.24609	2.39905	2.52347	2.75713	1.21554	8.29638	3.84541	1.40065	2.32465	-0.0767483	1.89457	3.44324	0.177706	0.993127	-0.0767483	3.0767	1.9713	1.04346	5.50716	1.24609	2.39905	2.52347	2.69783	2.77564	1.01364	0.408081	3.675	1.40065	2.32465	1.40065	2.32465	2.87839	0.972969	4.71157	4.85245	2.54804	1.90985	1.11782
84	-0.102517	2.0196	3.44324	0.172108	0.87586	-0.102517	3.07124	-0.227275	1.95134	1.03799	5.57702	1.23125	2.41796	2.49237	2.88427	1.27392	8.37336	3.675	1.42549	2.26773	-0.102517	2.0196	3.46717	0.172108	0.87586	-0.102517	3.07124	1.95134	1.03799	5.57702	1.23125	2.41796	2.49237	2.59787	2.69706	0.962147	0.409751	3.78248	1.42549	2.26773	1.42549	2.26773	2.86912	0.973725	4.46528	4.91913	2.53115	1.91777	1.1146
85	-0.077421	1.88887	3.46717	0.176909	0.934659	-0.077421	2.96197	-0.171249	2.01843	1.01121	5.51958	1.22259	2.40243	2.51091	2.77564	1.27632	8.24947	3.78248	1.34431	2.28852	-0.077421	1.88887	3.36135	0.176909	0.934659	-0.077421	2.96197	2.01843	1.01121	5.51958	1.22259	2.40243	2.51091	2.6299	2.56873	0.96176	0.387087	3.78893	1.34431	2.28852	1.34431	2.28852	2.8657	0.968023	4.81275	4.69687	2.55508	1.87984	1.11178
86	-0.169272	2.06383	3.36135	0.000994766	0.88912	-0.169272	2.85527	-0.240989	1.94757	0.940275	5.5002	1.20806	2.35278	2.45484	2.69706	1.23616	8.35516	3.78893	1.40683	2.29685	-0.169272	2.06383	3.30312	0.000994766	0.88912	-0.169272	2.85527	1.94757	0.940275	5.5002	1.20806	2.35278	2.45484	2.70061	2.69783	0.958623	0.412295	3.60922	1.40683	2.29685	1.40683	2.29685	2.86283	0.960465	4.7717	4.8087	2.55027	1.90786	1.10792
87	-0.179184	1.89764	3.30312	0.0336878	0.911051	-0.179184	2.7797	-0.254698	1.8205	0.941415	5.56662	1.1662	2.39927	2.44939	2.56873	1.2868	8.26927	3.60922	1.37914	2.30447	-0.179184	1.89764	3.34835	0.0336878	0.911051	-0.179184	2.7797	1.8205	0.941415	5.56662	1.1662	2.39927	2.44939	2.75407	2.59787	0.942197	0.395855	3.50056	1.37914	2.30447	1.37914	2.30447	2.8779	0.948659	4.60636	4.74077	2.53528	1.95336	1.09537
88	-0.207292	2.00963	3.34835	0.0156052	0.900342	-0.207292	2.86782	-0.27907	1.918	0.922231	5.6151	1.20524	2.37886	2.47409	2.69783	1.26037	8.30867	3.50056	1.32084	2.32659	-0.207292	2.00963	3.38706	0.0156052	0.900342	-0.207292	2.86782	1.918	0.922231	5.6151	1.20524	2.37886	2.47409	2.52644	2.6299	0.920608	0.382101	3.44897	1.32084	2.32659	1.32084	2.32659	2.8164	0.950613	4.48613	4.74117	2.61577	1.89051	1.09648
89	-0.245066	1.92579	3.38706	-0.0426458	0.850934	-0.245066	2.66859	-0.268265	1.84573	0.891939	5.53771	1.14904	2.3555	2.45014	2.59787	1.19648	8.21359	3.44897	1.31376	2.28937	-0.245066	1.92579	3.3553	-0.0426458	0.850934	-0.245066	2.66859	1.84573	0.891939	5.53771	1.14904	2.3555	2.45014	2.56978	2.70061	0.930398	0.35284	3.4	1.31376	2.28937	1.31376	2.28937	2.8161	0.927623	4.79399	4.85748	2.60084	1.91211	1.07977
90	-0.322554	1.8832	3.3553	-0.0374343	0.854092	-0.322554	2.65924	-0.295384	1.84938	0.869912	5.50271	1.14286	2.3408	2.46596	2.6299	1.20871	8.19592	3.4	1.31893	2.28966	-0.322554	1.8832	3.27517	-0.0374343	0.854092	-0.322554	2.65924	1.84938	0.869912	5.50271	1.14286	2.3408	2.46596	2.44086	2.75407	0.918209	0.298091	3.21294	1.31893	2.28966	1.31893	2.28966	2.84613	0.920416	4.63321	4.77554	2.50278	1.88752	1.06735
91	-0.265298	2.05117	3.27517	-0.0104302	0.82115	-0.265298	2.60933	-0.304073	1.78698	0.851516	5.62385	1.18962	2.35477	2.41758	2.70061	1.24085	8.14336	3.21294	1.31548	2.2597	-0.265298	2.05117	3.24037	-0.0104302	0.82115	-0.265298	2.60933	1.78698	0.851516	5.62385	1.18962	2.35477	2.41758	2.50261	2.52644	0.928591	0.279789	3.24052	1.31548	2.2597	1.31548	2.2597	2.89505	0.917912	4.63329	4.77778	2.5517	1.88462	1.06621
92	-0.330084	1.94437	3.24037	-0.076409	0.874059	-0.330084	2.43185	-0.274794	1.7502	0.80897	5.56301	1.15766	2.35698	2.4381	2.75407	1.27565	8.09395	3.24052	1.30485	2.29159	-0.330084	1.94437	3.26362	-0.076409	0.874059	-0.330084	2.43185	1.7502	0.80897	5.56301	1.15766	2.35698	2.4381	2.52956	2.56978	0.91063	0.284076	3.11185	1.30485	2.29159	1.30485	2.29159	2.90002	0.913025	4.59556	4.81632	2.47925	1.89604	1.06325
93	-0.404061	1.91426	3.26362	-0.153561	0.806068	-0.404061	2.38782	-0.292181	1.6654	0.774859	5.5527	1.15237	2.35905	2.37506	2.52644	1.23297	8.20561	3.11185	1.24388	2.29114	-0.404061	1.91426	3.155	-0.153561	0.806068	-0.404061	2.38782	1.6654	0.774859	5.5527	1.15237	2.35905	2.37506	2.46474	2.44086	0.854214	0.313558	3.16911	1.24388	2.29114	1.24388	2.29114	2.78764	0.888473	4.6065	4.83297	2.52697	1.85129	1.03924
94	-0.393584	1.86858	3.155	-0.19859	0.721649	-0.393584	2.43446	-0.321642	1.57458	0.781819	5.58067	1.12773	2.31356	2.4009	2.56978	1.30774	8.08688	3.16911	1.22493	2.31985	-0.393584	1.86858	3.04195	-0.19859	0.721649	-0.393584	2.43446	1.57458	0.781819	5.58067	1.12773	2.31356	2.4009	2.41713	2.50261	0.873303	0.283024	2.99207	1.22493	2.31985	1.22493	2.31985	2.85888	0.884305	4.58207	4.80492	2.54062	1.89507	1.03462
95	-0.4353	1.86771	3.04195	-0.184514	0.650425	-0.4353	2.34852	-0.353742	1.5403	0.745836	5.59888	1.09888	2.30946	2.3141	2.44086	1.24095	8.17573	2.99207	1.21048	2.30297	-0.4353	1.86771	3.0405	-0.184514	0.650425	-0.4353	2.34852	1.5403	0.745836	5.59888	1.09888	2.30946	2.3141	2.42687	2.52956	0.877423	0.257223	3.03937	1.21048	2.30297	1.21048	2.30297	2.88535	0.868217	4.40683	4.74796	2.50394	1.86455	1.0208
96	-0.469993	1.88824	3.0405	-0.2791	0.675465	-0.469993	2.2381	-0.371016	1.60131	0.697623	5.46418	1.08159	2.24737	2.27993	2.50261	1.2918	7.97305	3.03937	1.22702	2.22586	-0.469993	1.88824	3.03813	-0.2791	0.675465	-0.469993	2.2381	1.60131	0.697623	5.46418	1.08159	2.24737	2.27993	2.45304	2.46474	0.86426	0.223788	2.89488	1.22702	2.22586	1.22702	2.22586	2.90281	0.85158	4.48914	4.72581	2.47729	1.89006	1.00243
97	-0.439999	1.9829	3.03813	-0.245349	0.666407	-0.439999	2.22724	-0.332652	1.58395	0.702747	5.54563	1.10454	2.2963	2.32489	2.52956	1.29368	8.1405	2.89488	1.20554	2.24709	-0.439999	1.9829	3.0266	-0.245349	0.666407	-0.439999	2.22724	1.58395	0.702747	5.54563	1.10454	2.2963	2.32489	2.50678	2.41713	0.832726	0.210633	3.01242	1.20554	2.24709	1.20554	2.24709	2.83432	0.856731	4.55682	4.65502	2.52703	1.88492	1.00987
98	-0.478718	1.85744	3.0266	-0.286929	0.631729	-0.478718	2.13495	-0.372016	1.53367	0.660762	5.51724	1.07723	2.26748	2.27675	2.46474	1.28981	7.98314	3.01242	1.21316	2.29183	-0.478718	1.85744	2.98166	-0.286929	0.631729	-0.478718	2.13495	1.53367	0.660762	5.51724	1.07723	2.26748	2.27675	2.40174	2.42687	0.832452	0.214383	2.96394	1.21316	2.29183	1.21316	2.29183	2.88891	0.842456	4.58698	4.88627	2.51282	1.86997	0.995521
99	-0.461974	1.92394	2.98166	-0.291367	0.626777	-0.461974	2.08254	-0.367794	1.49677	0.667583	5.58024	1.08363	2.26213	2.26329	2.41713	1.26242	8.1549	2.96394	1.174	2.25575	-0.461974	1.92394	2.84496	-0.291367	0.626777	-0.461974	2.08254	1.49677	0.667583	5.58024	1.08363	2.26213	2.26329	2.60904	2.45304	0.817055	0.215849	2.76973	1.174	2.25575	1.174	2.25575	2.87584	0.840072	4.44473	4.80168	2.52498	1.84039	0.991393
100	-0.507915	1.927	2.84496	-0.324219	0.614627	-0.507915	2.062	-0.37898	1.46762	0.624733	5.51673	1.06531	2.23579	2.26609	2.42687	1.25344	7.99716	2.76973	1.16234	2.22227	-0.507915	1.927	2.81299	-0.324219	0.614627	-0.507915	2.062	1.46762	0.624733	5.51673	1.06531	2.23579	2.26609	2.3853	2.50678	0.802795	0.188154	2.88265	1.16234	2.22227	1.16234	2.22227	2.90318	0.819179	4.44599	4.82459	2.45785	1.85524	0.972755
101	-0.494408	1.97374	2.81299	-0.34939	0.58638	-0.494408	1.97384	-0.3869	1.39988	0.569876	5.49917	1.07643	2.21625	2.22135	2.45304	1.25719	8.17093	2.88265	1.13618	2.21778	-0.494408	1.97374	2.76613	-0.34939	0.58638	-0.494408	1.97384	1.39988	0.569876	5.49917	1.07643	2.21625	2.22135	2.3957	2.40174	0.787068	0.16684	2.84402	1.13618	2.21778	1.13618	2.21778	2.86343	0.81887	4.53797	4.74595	2.45326	1.89049	0.972911
102	-0.560772	2.03091	2.76613	-0.425781	0.585668	-0.560772	1.95887	-0.437362	1.42923	0.585986	5.53448	1.07357	2.23581	2.22858	2.50678	1.24523	8.01002	2.84402	1.10836	2.24858	-0.560772	2.03091	2.77038	-0.425781	0.585668	-0.560772	1.95887	1.42923	0.585986	5.53448	1.07357	2.23581	2.22858	2.51239	2.60904	0.769591	0.173392	2.66469	1.10836	2.24858	1.10836	2.24858	2.82185	0.810936	4.48965	4.65866	2.52545	1.87721	0.966223
103	-0.528844	2.0542	2.77038	-0.321545	0.59062	-0.528844	1.84771	-0.408705	1.39675	0.545174	5.50411	1.06785	2.24185	2.18666	2.40174	1.25754	8.00307	2.66469	1.08625	2.22711	-0.528844	2.0542	2.77768	-0.321545	0.59062	-0.528844	1.84771	1.39675	0.545174	5.50411	1.06785	2.24185	2.18666	2.40582	2.3853	0.768997	0.138664	2.76167	1.08625	2.22711	1.08625	2.22711	2.90824	0.810275	4.55665	4.68496	2.53856	1.86704	0.964223
104	-0.568434	1.95983	2.77768	-0.419283	0.582899	-0.568434	1.79618	-0.386248	1.33034	0.525893	5.39892	1.04916	2.14454	2.14981	2.60904	1.28472	8.01006	2.76167	1.06916	2.24431	-0.568434	1.95983	2.62124	-0.419283	0.582899	-0.568434	1.79618	1.33034	0.525893	5.39892	1.04916	2.14454	2.14981	2.34968	2.3957	0.776228	0.142462	2.62794	1.06916	2.24431	1.06916	2.24431	2.82737	0.79189	4.58507	4.7629	2.53627	1.88304	0.950413
105	-0.592086	1.98153	2.62124	-0.467088	0.513733	-0.592086	1.78201	-0.425319	1.29284	0.503881	5.46073	1.05587	2.14138	2.11514	2.3853	1.29796	7.97839	2.62794	1.04114	2.21253	-0.592086	1.98153	2.56957	-0.467088	0.513733	-0.592086	1.78201	1.29284	0.503881	5.46073	1.05587	2.14138	2.11514	2.30624	2.51239	0.749634	0.0953527	2.68285	1.04114	2.21253	1.04114	2.21253	2.91059	0.786056	4.25515	4.75588	2.51146	1.83287	0.94265
106	-0.647916	1.92463	2.56957	-0.474359	0.525418	-0.647916	1.68127	-0.445571	1.22866	0.488587	5.37422	1.0035	2.09156	2.11402	2.3957	1.20807	7.88027	2.68285	0.983983	2.18177	-0.647916	1.92463	2.69208	-0.474359	0.525418	-0.647916	1.68127	1.22866	0.488587	5.37422	1.0035	2.09156	2.11402	2.2596	2.40582	0.776343	0.0988539	2.6636	0.983983	2.18177	0.983983	2.18177	2.90085	0.768076	4.54447	4.68272	2.46164	1.8685	0.925207
107	-0.585453	1.9513	2.69208	-0.45992	0.513856	-0.585453	1.81343	-0.446247	1.26037	0.493783	5.43821	1.0168	2.13466	2.12352	2.51239	1.29632	8.00069	2.6636	0.995977	2.18456	-0.585453	1.9513	2.46888	-0.45992	0.513856	-0.585453	1.81343	1.26037	0.493783	5.43821	1.0168	2.13466	2.12352	2.37379	2.34968	0.753686	0.104213	2.50961	0.995977	2.18456	0.995977	2.18456	2.87882	0.778278	4.09132	4.55406	2.39541	1.85041	0.928982
108	-0.597864	1.90843	2.46888	-0.521368	0.496507	-0.597864	1.54579	-0.468841	1.19902	0.427521	5.28257	0.983411	2.11806	2.07436	2.40582	1.31774	7.92749	2.50961	1.00963	2.14451	-0.597864	1.90843	2.51687	-0.521368	0.496507	-0.597864	1.54579	1.19902	0.427521	5.28257	0.983411	2.11806	2.07436	2.40193	2.30624	0.715728	0.102172	2.52047	1.00963	2.14451	1.00963	2.14451	2.85253	0.748852	4.40804	4.53145	2.47036	1.86537	0.902095
109	-0.558772	1.97899	2.51687	-0.498848	0.488341	-0.558772	1.52531	-0.436593	1.22004	0.409631	5.33485	1.0107	2.08789	2.01973	2.34968	1.25913	8.06319	2.52047	1.01465	2.1869	-0.558772	1.97899	2.51985	-0.498848	0.488341	-0.558772	1.52531	1.22004	0.409631	5.33485	1.0107	2.08789	2.01973	2.30442	2.2596	0.720742	0.0624928	2.43727	1.01465	2.1869	1.01465	2.1869	2.85395	0.748299	4.27859	4.64786	2.54118	1.85295	0.9016
110	-0.626024	2.03469	2.51985	-0.442338	0.405477	-0.626024	1.52892	-0.492257	1.159	0.404893	5.36121	0.996531	2.10118	1.99718	2.30624	1.21889	7.78902	2.43727	0.925096	2.20322	-0.626024	2.03469	2.50588	-0.442338	0.405477	-0.626024	1.52892	1.159	0.404893	5.36121	0.996531	2.10118	1.99718	2.22637	2.37379	0.711832	0.051108	2.28629	0.925096	2.20322	0.925096	2.20322	2.88782	0.734432	4.26209	4.6417	2.4813	1.84373	0.888574
111	-0.644968	1.99861	2.50588	-0.499338	0.396295	-0.644968	1.47133	-0.483328	1.20344	0.399074	5.40617	0.998159	2.08157	2.03428	2.2596	1.33212	7.88249	2.28629	0.940961	2.20336	-0.644968	1.99861	2.26789	-0.499338	0.396295	-0.644968	1.47133	1.20344	0.399074	5.40617	0.998159	2.08157	2.03428	2.1816	2.40193	0.707786	0.0691059	2.35653	0.940961	2.20336	0.940961	2.20336	2.86578	0.737706	4.19184	4.58613	2.53466	1.8318	0.892839
112	-0.65425	2.00354	2.26789	-0.545652	0.400507	-0.65425	1.45982	-0.477334	1.20928	0.396788	5.33945	0.994097	2.09644	1.93824	2.37379	1.30609	7.71728	2.35653	0.913632	2.1821	-0.65425	2.00354	2.30396	-0.545652	0.400507	-0.65425	1.45982	1.20928	0.396788	5.33945	0.994097	2.09644	1.93824	2.0964	2.30442	0.661088	0.0333442	2.31276	0.913632	2.1821	0.913632	2.1821	2.88539	0.726047	4.20286	4.49513	2.4748	1.8432	0.87998
113	-0.710087	2.04352	2.30396	-0.56312	0.433876	-0.710087	1.42204	-0.519563	1.21149	0.352345	5.37913	0.977199	2.15388	2.01392	2.40193	1.28261	7.79067	2.31276	0.881286	2.1122	-0.710087	2.04352	2.17433	-0.56312	0.433876	-0.710087	1.42204	1.21149	0.352345	5.37913	0.977199	2.15388	2.01392	2.23692	2.22637	0.652362	0.00550791	2.17594	0.881286	2.1122	0.881286	2.1122	2.88507	0.715718	4.25823	4.59181	2.44108	1.89188	0.873866
114	-0.635919	1.9967	2.17433	-0.609343	0.439586	-0.635919	1.27527	-0.526875	1.14692	0.322037	5.26357	0.952855	2.06889	1.97448	2.30442	1.22363	7.85609	2.17594	0.847722	2.11481	-0.635919	1.9967	2.14224	-0.609343	0.439586	-0.635919	1.27527	1.14692	0.322037	5.26357	0.952855	2.06889	1.97448	2.0789	2.1816	0.6566	0.0186746	2.23035	0.847722	2.11481	0.847722	2.11481	2.84162	0.703575	4.19367	4.60359	2.39598	1.85387	0.858566
115	-0.671301	1.8783	2.14224	-0.64215	0.391041	-0.671301	1.26435	-0.518103	1.08821	0.308683	5.27096	0.940139	2.03268	1.98322	2.22637	1.30314	7.75033	2.23035	0.852802	2.15464	-0.671301	1.8783	2.0642	-0.64215	0.391041	-0.671301	1.26435	1.08821	0.308683	5.27096	0.940139	2.03268	1.98322	2.07258	2.0964	0.672191	-0.013073	2.19582	0.852802	2.15464	0.852802	2.15464	2.81894	0.692292	4.03513	4.70645	2.49014	1.88507	0.849206
116	-0.732792	2.13639	2.0642	-0.535502	0.335173	-0.732792	1.31665	-0.533649	1.08951	0.3124	5.3163	0.988732	2.01864	1.86361	2.1816	1.24693	7.68683	2.19582	0.849317	2.1374	-0.732792	2.13639	2.19534	-0.535502	0.335173	-0.732792	1.31665	1.08951	0.3124	5.3163	0.988732	2.01864	1.86361	2.14598	2.23692	0.635236	-0.0228488	2.2587	0.849317	2.1374	0.849317	2.1374	2.82272	0.694352	4.1987	4.60714	2.47395	1.87326	0.853246
117	-0.645442	2.03834	2.19534	-0.48022	0.300637	-0.645442	1.20551	-0.547588	1.09601	0.265673	5.21842	0.967567	2.03602	1.90102	2.0964	1.27603	7.7208	2.2587	0.861577	2.13851	-0.645442	2.03834	1.97045	-0.48022	0.300637	-0.645442	1.20551	1.09601	0.265673	5.21842	0.967567	2.03602	1.90102	2.16079	2.0789	0.640303	-0.0199769	2.2627	0.861577	2.13851	0.861577	2.13851	2.83209	0.686139	3.83137	4.5745	2.42119	1.85949	0.840435
118	-0.727288	2.03758	1.97045	-0.554585	0.316544	-0.727288	1.19592	-0.568403	0.990871	0.270245	5.32662	0.949646	1.97743	1.84743	2.23692	1.26189	7.64793	2.2627	0.765118	2.10304	-0.727288	2.03758	1.97606	-0.554585	0.316544	-0.727288	1.19592	0.990871	0.270245	5.32662	0.949646	1.97743	1.84743	2.22139	2.07258	0.638842	-0.0162834	2.06001	0.765118	2.10304	0.765118	2.10304	2.84426	0.673489	4.1975	4.63175	2.42784	1.83489	0.830583
119	-0.735781	1.97501	1.97606	-0.637575	0.33522	-0.735781	0.99538	-0.587657	1.00424	0.195038	5.1767	0.918491	1.91102	1.82406	2.0789	1.24722	7.7078	2.06001	0.752206	2.11844	-0.735781	1.97501	2.08368	-0.637575	0.33522	-0.735781	0.99538	1.00424	0.195038	5.1767	0.918491	1.91102	1.82406	2.22489	2.14598	0.621563	-0.02567	2.22026	0.752206	2.11844	0.752206	2.11844	2.85978	0.659473	4.0098	4.42133	2.40728	1.80767	0.81361
120	-0.753621	2.09337	2.08368	-0.576957	0.284616	-0.753621	1.08995	-0.578381	1.0634	0.23106	5.22848	0.930555	1.94015	1.7974	2.07258	1.33405	7.76164	2.22026	0.725472	2.10327	-0.753621	2.09337	1.90751	-0.576957	0.284616	-0.753621	1.08995	1.0634	0.23106	5.22848	0.930555	1.94015	1.7974	2.03882	2.16079	0.599446	-0.0295798	2.22209	0.725472	2.10327	0.725472	2.10327	2.84533	0.665859	4.12465	4.55672	2.48102	1.82775	0.821562
121	-0.745984	2.09492	1.90751	-0.581349	0.283886	-0.745984	0.961593	-0.567155	0.991743	0.187785	5.1052	0.909085	1.96144	1.86492	2.14598	1.32572	7.5396	2.22209	0.695942	2.05334	-0.745984	2.09492	1.78588	-0.581349	0.283886	-0.745984	0.961593	0.991743	0.187785	5.1052	0.909085	1.96144	1.86492	2.04659	2.22139	0.552468	-0.0654413	2.10327	0.695942	2.05334	0.695942	2.05334	2.87617	0.65599	4.17739	4.75583	2.42075	1.82807	0.818664
122	-0.729197	2.07645	1.78588	-0.622418	0.313518	-0.729197	1.01122	-0.557991	0.990355	0.188302	5.03359	0.901091	1.94034	1.76897	2.16079	1.2757	7.5489	2.10327	0.749078	2.03894	-0.729197	2.07645	1.79283	-0.622418	0.313518	-0.729197	1.01122	0.990355	0.188302	5.03359	0.901091	1.94034	1.76897	2.0779	2.22489	0.557164	-0.0801543	2.11418	0.749078	2.03894	0.749078	2.03894	2.86179	0.645925	3.97784	4.61788	2.43043	1.83346	0.803798
123	-0.735233	1.99106	1.79283	-0.661188	0.262573	-0.735233	0.958635	-0.618381	0.998232	0.169618	5.05717	0.857774	1.91479	1.78343	2.22139	1.31662	7.33721	2.11418	0.657013	2.03578	-0.735233	1.99106	1.85012	-0.661188	0.262573	-0.735233	0.958635	0.998232	0.169618	5.05717	0.857774	1.91479	1.78343	2.01787	2.03882	0.545725	-0.113393	2.07084	0.657013	2.03578	0.657013	2.03578	2.89394	0.628059	3.59178	4.60466	2.37277	1.86791	0.78425
124	-0.745618	1.9621	1.85012	-0.50637	0.200757	-0.745618	0.879632	-0.59519	0.979693	0.132508	5.07447	0.893194	1.9133	1.81392	2.22489	1.2749	7.43353	2.07084	0.673437	2.06131	-0.745618	1.9621	1.99866	-0.50637	0.200757	-0.745618	0.879632	0.979693	0.132508	5.07447	0.893194	1.9133	1.81392	2.17134	2.04659	0.555552	-0.0901911	2.00481	0.673437	2.06131	0.673437	2.06131	2.89734	0.631599	3.90248	4.51407	2.45177	1.84872	0.788511
125	-0.745096	1.86405	1.99866	-0.635152	0.215213	-0.745096	0.828912	-0.619419	0.869038	0.13302	5.0712	0.861518	1.83654	1.7404	2.03882	1.27909	7.34918	2.00481	0.626169	2.03529	-0.745096	1.86405	1.73589	-0.635152	0.215213	-0.745096	0.828912	0.869038	0.13302	5.0712	0.861518	1.83654	1.7404	2.07723	2.0779	0.576376	-0.131935	1.9915	0.626169	2.03529	0.626169	2.03529	2.86857	0.618298	3.84137	4.62716	2.51233	1.82151	0.777081
126	-0.788688	2.1187	1.73589	-0.674661	0.250166	-0.788688	0.878453	-0.601728	0.861881	0.122208	5.04374	0.866811	1.90508	1.715	2.04659	1.23323	7.27052	1.9915	0.630911	2.03787	-0.788688	2.1187	1.76389	-0.674661	0.250166	-0.788688	0.878453	0.861881	0.122208	5.04374	0.866811	1.90508	1.715	2.03355	2.01787	0.545326	-0.0854627	2.03369	0.630911	2.03787	0.630911	2.03787	2.88418	0.615286	3.76969	4.75194	2.33348	1.87751	0.774655
127	-0.787268	2.05437	1.76389	-0.613747	0.21324	-0.787268	0.791216	-0.624048	0.926891	0.110288	5.06162	0.862409	1.90557	1.70558	2.0779	1.27776	7.2268	2.03369	0.644548	2.03844	-0.787268	2.05437	1.61591	-0.613747	0.21324	-0.787268	0.791216	0.926891	0.110288	5.06162	0.862409	1.90557	1.70558	2.00162	2.17134	0.549051	-0.0883406	1.96604	0.644548	2.03844	0.644548	2.03844	2.88893	0.61982	3.77439	4.73724	2.41259	1.84754	0.776284
128	-0.774476	2.08268	1.61591	-0.61385	0.23738	-0.774476	0.765562	-0.623299	0.887198	0.0775101	5.03863	0.840644	1.90207	1.67213	2.01787	1.30022	7.36878	1.96604	0.556261	2.02267	-0.774476	2.08268	1.65621	-0.61385	0.23738	-0.774476	0.765562	0.887198	0.0775101	5.03863	0.840644	1.90207	1.67213	2.14972	2.07723	0.557497	-0.125717	1.95962	0.556261	2.02267	0.556261	2.02267	2.87594	0.6149	3.86981	4.65742	2.4714	1.86404	0.774882
129	-0.751438	2.04945	1.65621	-0.620472	0.248089	-0.751438	0.732904	-0.596934	0.798797	0.0852632	5.05982	0.863454	1.9515	1.78292	2.17134	1.38133	7.10971	1.95962	0.567402	2.03239	-0.751438	2.04945	1.65769	-0.620472	0.248089	-0.751438	0.732904	0.798797	0.0852632	5.05982	0.863454	1.9515	1.78292	2.17512	2.03355	0.52053	-0.122308	1.98953	0.567402	2.03239	0.567402	2.03239	2.92094	0.607216	3.53636	4.50695	2.44439	1.81972	0.761999
130	-0.803449	1.96293	1.65769	-0.638418	0.182451	-0.803449	0.747593	-0.598941	0.911519	0.082766	5.08879	0.852045	1.81269	1.74301	2.07723	1.31893	7.10008	1.98953	0.59509	2.04275	-0.803449	1.96293	1.61261	-0.638418	0.182451	-0.803449	0.747593	0.911519	0.082766	5.08879	0.852045	1.81269	1.74301	2.00373	2.00162	0.528672	-0.103698	1.90669	0.59509	2.04275	0.59509	2.04275	2.88756	0.603736	3.57743	4.69038	2.44819	1.80518	0.761988
131	-0.764812	1.9657	1.61261	-0.629985	0.239068	-0.764812	0.682111	-0.633946	0.853945	0.0608769	5.04147	0.811219	1.85164	1.66477	2.03355	1.33751	7.1711	1.90669	0.552464	1.98762	-0.764812	1.9657	1.67162	-0.629985	0.239068	-0.764812	0.682111	0.853945	0.0608769	5.04147	0.811219	1.85164	1.66477	2.03001	2.14972	0.50776	-0.126094	1.97701	0.552464	1.98762	0.552464	1.98762	2.84193	0.595564	3.66763	4.6062	2.42619	1.80776	0.752334
132	-0.771554	2.03171	1.67162	-0.639852	0.193776	-0.771554	0.606366	-0.647523	0.900586	0.0292768	4.96	0.829672	1.86224	1.60594	2.00162	1.38434	7.17694	1.97701	0.55317	2.02051	-0.771554	2.03171	1.59501	-0.639852	0.193776	-0.771554	0.606366	0.900586	0.0292768	4.96	0.829672	1.86224	1.60594	2.03293	2.17512	0.500169	-0.14819	1.99213	0.55317	2.02051	0.55317	2.02051	2.87558	0.596838	3.77968	4.66796	2.44781	1.8389	0.75529
133	-0.80344	1.90395	1.59501	-0.615955	0.201544	-0.80344	0.569291	-0.641102	0.736154	0.0255653	4.95315	0.809601	1.80217	1.63062	2.14972	1.33602	7.13034	1.99213	0.528885	2.00571	-0.80344	1.90395	1.49925	-0.615955	0.201544	-0.80344	0.569291	0.736154	0.0255653	4.95315	0.809601	1.80217	1.63062	1.9731	2.00373	0.512299	-0.138192	1.87016	0.528885	2.00571	0.528885	2.00571	2.84802	0.589318	3.58914	4.55659	2.39304	1.80485	0.745174
134	-0.806786	2.02149	1.49925	-0.595745	0.113209	-0.806786	0.6944	-0.657461	0.813049	0.0565803	5.10608	0.809998	1.8402	1.58126	2.17512	1.32985	7.12343	1.87016	0.569089	2.01375	-0.806786	2.02149	1.50311	-0.595745	0.113209	-0.806786	0.6944	0.813049	0.0565803	5.10608	0.809998	1.8402	1.58126	2.01457	2.03001	0.504006	-0.110701	1.94384	0.569089	2.01375	0.569089	2.01375	2.86076	0.593328	3.71743	4.61001	2.40489	1.81532	0.748982
135	-0.808968	2.00689	1.50311	-0.657683	0.103021	-0.808968	0.506271	-0.66112	0.835589	0.00324669	4.95587	0.782459	1.77101	1.58773	2.00373	1.37227	7.11566	1.94384	0.490441	1.98937	-0.808968	2.00689	1.53513	-0.657683	0.103021	-0.808968	0.506271	0.835589	0.00324669	4.95587	0.782459	1.77101	1.58773	2.08648	2.03293	0.522652	-0.14699	1.76492	0.490441	1.98937	0.490441	1.98937	2.9016	0.573649	3.61905	4.54114	2.34002	1.81508	0.730212
136	-0.806304	2.04081	1.53513	-0.625877	0.139701	-0.806304	0.52033	-0.648077	0.782694	0.00660559	4.92776	0.802685	1.83862	1.57888	2.03001	1.32552	7.13955	1.76492	0.503371	2.00822	-0.806304	2.04081	1.54106	-0.625877	0.139701	-0.806304	0.52033	0.782694	0.00660559	4.92776	0.802685	1.83862	1.57888	2.03724	1.9731	0.482952	-0.146661	1.74871	0.503371	2.00822	0.503371	2.00822	2.88336	0.575282	3.6766	4.34783	2.38561	1.87501	0.73214
137	-0.763973	2.07265	1.54106	-0.609537	0.111301	-0.763973	0.443789	-0.671052	0.745699	-0.0298453	4.95858	0.811869	1.82698	1.5934	2.03293	1.35541	6.82369	1.74871	0.505976	1.99413	-0.763973	2.07265	1.52517	-0.609537	0.111301	-0.763973	0.443789	0.745699	-0.0298453	4.95858	0.811869	1.82698	1.5934	2.00426	2.01457	0.481866	-0.159834	1.75297	0.505976	1.99413	0.505976	1.99413	2.81214	0.567622	3.45195	4.75422	2.39104	1.80676	0.72542
138	-0.761359	1.88856	1.52517	-0.639373	0.0846577	-0.761359	0.503592	-0.681142	0.789614	-0.0253874	4.94219	0.76711	1.73014	1.50745	1.9731	1.3478	6.96587	1.75297	0.465567	1.99488	-0.761359	1.88856	1.47835	-0.639373	0.0846577	-0.761359	0.503592	0.789614	-0.0253874	4.94219	0.76711	1.73014	1.50745	2.00896	2.08648	0.49411	-0.161925	1.72883	0.465567	1.99488	0.465567	1.99488	2.90912	0.566727	3.57213	4.53182	2.35614	1.80899	0.723743
139	-0.780752	1.97738	1.47835	-0.619402	0.127322	-0.780752	0.489585	-0.651348	0.706396	-0.0263402	4.91096	0.784656	1.78776	1.51476	2.01457	1.39463	6.90511	1.72883	0.456958	1.95377	-0.780752	1.97738	1.50367	-0.619402	0.127322	-0.780752	0.489585	0.706396	-0.0263402	4.91096	0.784656	1.78776	1.51476	1.87328	2.03724	0.480157	-0.149836	1.82395	0.456958	1.95377	0.456958	1.95377	2.84887	0.560589	3.61253	4.52044	2.36306	1.82007	0.717658
140	-0.775953	2.06898	1.50367	-0.698388	0.129893	-0.775953	0.470603	-0.656188	0.802829	-0.0116649	4.97429	0.78703	1.77893	1.55023	2.08648	1.40773	6.94742	1.82395	0.454775	1.9643	-0.775953	2.06898	1.36815	-0.698388	0.129893	-0.775953	0.470603	0.802829	-0.0116649	4.97429	0.78703	1.77893	1.55023	1.8367	2.00426	0.456795	-0.158107	1.70923	0.454775	1.9643	0.454775	1.9643	2.90743	0.560006	3.29825	4.61651	2.36476	1.83015	0.71608
141	-0.77108	2.15925	1.36815	-0.638588	0.0504822	-0.77108	0.436827	-0.659302	0.741729	-0.0187062	4.92486	0.807366	1.8668	1.58279	2.03724	1.40303	6.85382	1.70923	0.408515	2.00745	-0.77108	2.15925	1.37319	-0.638588	0.0504822	-0.77108	0.436827	0.741729	-0.0187062	4.92486	0.807366	1.8668	1.58279	1.98796	2.00896	0.436747	-0.1675	1.76484	0.408515	2.00745	0.408515	2.00745	2.86785	0.564343	3.41798	4.7889	2.37362	1.82559	0.722718
142	-0.787941	2.0581	1.37319	-0.653598	0.0967793	-0.787941	0.342081	-0.671645	0.665647	-0.0714612	4.92451	0.794621	1.78891	1.55573	2.00426	1.37557	6.88925	1.76484	0.411019	1.96438	-0.787941	2.0581	1.50877	-0.653598	0.0967793	-0.787941	0.342081	0.665647	-0.0714612	4.92451	0.794621	1.78891	1.55573	1.86628	1.87328	0.448968	-0.185413	1.68924	0.411019	1.96438	0.411019	1.96438	2.86845	0.547595	3.69978	4.6353	2.35786	1.83029	0.708637
143	-0.767644	1.95605	1.50877	-0.657421	0.0955943	-0.767644	0.340508	-0.698176	0.675723	-0.0789348	4.91475	0.756069	1.73861	1.51836	2.00896	1.36563	6.94694	1.68924	0.436936	1.96363	-0.767644	1.95605	1.40398	-0.657421	0.0955943	-0.767644	0.340508	0.675723	-0.0789348	4.91475	0.756069	1.73861	1.51836	1.88685	1.8367	0.460735	-0.154198	1.7915	0.436936	1.96363	0.436936	1.96363	2.87441	0.540033	3.32058	4.43701	2.31475	1.87494	0.695715
144	-0.781964	1.91636	1.40398	-0.612745	0.0278126	-0.781964	0.280519	-0.702731	0.698983	-0.105384	4.83812	0.725054	1.71143	1.4579	1.87328	1.39955	6.86137	1.7915	0.436433	1.97292	-0.781964	1.91636	1.44889	-0.612745	0.0278126	-0.781964	0.280519	0.698983	-0.105384	4.83812	0.725054	1.71143	1.4579	1.85209	1.98796	0.45954	-0.172975	1.65255	0.436433	1.97292	0.436433	1.97292	2.82526	0.53828	3.43054	4.59294	2.31249	1.82661	0.695913
145	-0.795769	2.07891	1.44889	-0.65493	-0.00250252	-0.795769	0.321742	-0.714075	0.644207	-0.100086	4.81459	0.741616	1.7245	1.43956	1.8367	1.41083	6.77522	1.65255	0.379407	1.95252	-0.795769	2.07891	1.43983	-0.65493	-0.00250252	-0.795769	0.321742	0.644207	-0.100086	4.81459	0.741616	1.7245	1.43956	1.9976	1.86628	0.467452	-0.163472	1.71951	0.379407	1.95252	0.379407	1.95252	2.87877	0.531018	3.45407	4.50815	2.35311	1.8264	0.688838
146	-0.766879	1.99146	1.43983	-0.621713	0.00561679	-0.766879	0.29078	-0.687259	0.664762	-0.0907023	4.81435	0.718179	1.70955	1.44271	1.98796	1.32915	6.91119	1.71951	0.402363	1.981	-0.766879	1.99146	1.49114	-0.621713	0.00561679	-0.766879	0.29078	0.664762	-0.0907023	4.81435	0.718179	1.70955	1.44271	1.96399	1.88685	0.46404	-0.171343	1.70034	0.402363	1.981	0.402363	1.981	2.84725	0.538911	3.15245	4.45483	2.34656	1.79802	0.694796
147	-0.791577	2.15563	1.49114	-0.663657	0.0309518	-0.791577	0.289571	-0.690688	0.63347	-0.11394	4.84473	0.771401	1.7314	1.49041	1.86628	1.38069	6.99611	1.70034	0.352546	1.91871	-0.791577	2.15563	1.27183	-0.663657	0.0309518	-0.791577	0.289571	0.63347	-0.11394	4.84473	0.771401	1.7314	1.49041	1.98302	1.85209	0.484268	-0.170594	1.64451	0.352546	1.91871	0.352546	1.91871	2.88972	0.534475	3.25704	4.5216	2.32784	1.81376	0.689273
148	-0.777813	1.9882	1.27183	-0.605713	0.00809244	-0.777813	0.200285	-0.70233	0.609235	-0.123952	4.79418	0.736599	1.70965	1.46856	1.88685	1.42386	6.88917	1.64451	0.372933	1.89554	-0.777813	1.9882	1.39759	-0.605713	0.00809244	-0.777813	0.200285	0.609235	-0.123952	4.79418	0.736599	1.70965	1.46856	1.96653	1.9976	0.435062	-0.165471	1.68172	0.372933	1.89554	0.372933	1.89554	2.8615	0.531611	3.32727	4.39631	2.32861	1.81618	0.688286
149	-0.776883	2.03021	1.39759	-0.630384	0.0427895	-0.776883	0.209751	-0.705455	0.617336	-0.134325	4.75514	0.711479	1.70964	1.5023	1.85209	1.41654	6.89806	1.68172	0.349758	1.92103	-0.776883	2.03021	1.39014	-0.630384	0.0427895	-0.776883	0.209751	0.617336	-0.134325	4.75514	0.711479	1.70964	1.5023	1.83368	1.96399	0.433336	-0.179818	1.6134	0.349758	1.92103	0.349758	1.92103	2.82671	0.5262	3.27937	4.37603	2.27628	1.82999	0.681901
150	-0.765867	2.17657	1.39014	-0.619766	0.0604508	-0.765867	0.186217	-0.695801	0.66103	-0.153398	4.83171	0.784736	1.79613	1.48715	1.9976	1.46087	6.84884	1.6134	0.319357	1.92072	-0.765867	2.17657	1.31882	-0.619766	0.0604508	-0.765867	0.186217	0.66103	-0.153398	4.83171	0.784736	1.79613	1.48715	1.93374	1.98302	0.435599	-0.182189	1.60216	0.319357	1.92072	0.319357	1.92072	2.8389	0.533364	3.20925	4.58527	2.28646	1.85145	0.69038
151	-0.767128	2.05	1.31882	-0.615249	-0.028359	-0.767128	0.295747	-0.696565	0.579117	-0.100364	4.84846	0.758897	1.73253	1.50111	1.96399	1.43742	7.03105	1.60216	0.35117	1.91779	-0.767128	2.05	1.33083	-0.615249	-0.028359	-0.767128	0.295747	0.579117	-0.100364	4.84846	0.758897	1.73253	1.50111	1.93182	1.96653	0.389852	-0.163461	1.51948	0.35117	1.91779	0.35117	1.91779	2.84678	0.531279	3.23844	4.51784	2.35252	1.80222	0.688515
152	-0.782719	2.06824	1.33083	-0.661723	-0.0256655	-0.782719	0.244457	-0.723875	0.629614	-0.138906	4.79057	0.731592	1.68195	1.43558	1.98302	1.48474	6.86844	1.51948	0.325218	1.95753	-0.782719	2.06824	1.21109	-0.661723	-0.0256655	-0.782719	0.244457	0.629614	-0.138906	4.79057	0.731592	1.68195	1.43558	1.93268	1.83368	0.42223	-0.176855	1.58827	0.325218	1.95753	0.325218	1.95753	2.89499	0.525686	3.1303	4.53294	2.30111	1.81703	0.68299
153	-0.780901	2.1663	1.21109	-0.605644	0.006442	-0.780901	0.130748	-0.739617	0.578098	-0.162928	4.83372	0.738574	1.7619	1.468	1.96653	1.41781	6.79384	1.58827	0.26169	1.89275	-0.780901	2.1663	1.29208	-0.605644	0.006442	-0.780901	0.130748	0.578098	-0.162928	4.83372	0.738574	1.7619	1.468	1.88167	1.93374	0.392591	-0.171138	1.54537	0.26169	1.89275	0.26169	1.89275	2.85598	0.515243	3.20413	4.66861	2.32374	1.75089	0.673871
154	-0.80432	2.0084	1.29208	-0.59678	0.0171888	-0.80432	0.225299	-0.738814	0.512432	-0.137503	4.88617	0.721384	1.72407	1.46365	1.83368	1.45419	7.01394	1.54537	0.314761	1.87629	-0.80432	2.0084	1.23001	-0.59678	0.0171888	-0.80432	0.225299	0.512432	-0.137503	4.88617	0.721384	1.72407	1.46365	1.87626	1.93182	0.397154	-0.166028	1.47577	0.314761	1.87629	0.314761	1.87629	2.81321	0.523286	3.18873	4.52127	2.24622	1.76598	0.679513
155	-0.786571	2.01577	1.23001	-0.693369	-0.0142924	-0.786571	0.137866	-0.746106	0.50837	-0.174049	4.7816	0.679658	1.71877	1.45718	1.93374	1.50299	6.8919	1.47577	0.281443	1.896	-0.786571	2.01577	1.27624	-0.693369	-0.0142924	-0.786571	0.137866	0.50837	-0.174049	4.7816	0.679658	1.71877	1.45718	1.94755	1.93268	0.412978	-0.171702	1.54778	0.281443	1.896	0.281443	1.896	2.8346	0.509274	3.17745	4.46444	2.23408	1.79972	0.666192
156	-0.785699	2.06597	1.27624	-0.671418	-0.0559238	-0.785699	0.158721	-0.751945	0.464259	-0.152671	4.89996	0.717655	1.68457	1.43559	1.93182	1.47052	6.93384	1.54778	0.270686	1.8834	-0.785699	2.06597	1.41757	-0.671418	-0.0559238	-0.785699	0.158721	0.464259	-0.152671	4.89996	0.717655	1.68457	1.43559	1.87266	1.88167	0.399942	-0.201827	1.42663	0.270686	1.8834	0.270686	1.8834	2.85988	0.515518	3.13233	4.48336	2.26553	1.80457	0.673383
157	-0.789377	2.01476	1.41757	-0.613007	-0.0286058	-0.789377	0.211355	-0.748462	0.50001	-0.136261	4.94585	0.715729	1.70751	1.4155	1.93268	1.38303	6.80685	1.42663	0.297034	1.84864	-0.789377	2.01476	1.39237	-0.613007	-0.0286058	-0.789377	0.211355	0.50001	-0.136261	4.94585	0.715729	1.70751	1.4155	1.85056	1.87626	0.391413	-0.19116	1.39902	0.297034	1.84864	0.297034	1.84864	2.85829	0.510994	3.18164	4.61685	2.28911	1.83275	0.667202
158	-0.791792	2.26537	1.39237	-0.587164	0.00697344	-0.791792	0.0699419	-0.738495	0.543087	-0.189276	4.83151	0.752086	1.82049	1.45434	1.88167	1.44222	6.78274	1.39902	0.246814	1.78085	-0.791792	2.26537	1.30748	-0.587164	0.00697344	-0.791792	0.0699419	0.543087	-0.189276	4.83151	0.752086	1.82049	1.45434	1.88144	1.94755	0.355199	-0.200509	1.53135	0.246814	1.78085	0.246814	1.78085	2.85373	0.50916	3.12909	4.40492	2.34336	1.76739	0.664623
159	-0.80168	1.92058	1.30748	-0.57674	-0.0433557	-0.80168	0.0626082	-0.775195	0.518304	-0.196928	4.80717	0.671995	1.67244	1.40311	1.87626	1.42437	6.90677	1.53135	0.215239	1.85167	-0.80168	1.92058	1.42441	-0.57674	-0.0433557	-0.80168	0.0626082	0.518304	-0.196928	4.80717	0.671995	1.67244	1.40311	1.83742	1.87266	0.37947	-0.173514	1.34573	0.215239	1.85167	0.215239	1.85167	2.8271	0.497777	3.05133	4.50647	2.26143	1.77394	0.654762
160	-0.796401	2.02921	1.42441	-0.649638	0.0258775	-0.796401	0.0568876	-0.755785	0.505203	-0.202263	4.85575	0.696525	1.69734	1.44184	1.94755	1.42876	6.89195	1.34573	0.24565	1.83839	-0.796401	2.02921	1.37393	-0.649638	0.0258775	-0.796401	0.0568876	0.505203	-0.202263	4.85575	0.696525	1.69734	1.44184	1.83421	1.85056	0.375494	-0.177555	1.55114	0.24565	1.83839	0.24565	1.83839	2.8799	0.496519	3.02321	4.4918	2.33091	1.83088	0.653535
161	-0.804012	1.95208	1.37393	-0.630475	-0.0354064	-0.804012	0.131162	-0.738011	0.410848	-0.185562	4.8211	0.686185	1.73624	1.5017	1.87266	1.4607	6.9511	1.55114	0.244438	1.85274	-0.804012	1.95208	1.21813	-0.630475	-0.0354064	-0.804012	0.131162	0.410848	-0.185562	4.8211	0.686185	1.73624	1.5017	1.75793	1.88144	0.379042	-0.182114	1.41846	0.244438	1.85274	0.244438	1.85274	2.82928	0.500438	3.1187	4.52296	2.28387	1.83537	0.657133
162	-0.797645	2.10385	1.21813	-0.584388	-0.00970172	-0.797645	0.0367464	-0.726084	0.478222	-0.19532	4.82864	0.732134	1.77808	1.50027	1.85056	1.40274	6.90634	1.41846	0.247255	1.85723	-0.797645	2.10385	1.33811	-0.584388	-0.00970172	-0.797645	0.0367464	0.478222	-0.19532	4.82864	0.732134	1.77808	1.50027	1.74815	1.83742	0.423417	-0.193407	1.4114	0.247255	1.85723	0.247255	1.85723	2.85017	0.503029	3.0699	4.49054	2.3496	1.79611	0.658484
163	-0.764215	2.02678	1.33811	-0.640978	-0.020989	-0.764215	0.167472	-0.725967	0.401791	-0.16701	4.89556	0.716532	1.68138	1.46342	1.88144	1.45242	6.93898	1.4114	0.231885	1.8217	-0.764215	2.02678	1.24627	-0.640978	-0.020989	-0.764215	0.167472	0.401791	-0.16701	4.89556	0.716532	1.68138	1.46342	1.81935	1.83421	0.381255	-0.197354	1.40881	0.231885	1.8217	0.231885	1.8217	2.80629	0.500652	3.23367	4.54519	2.22785	1.7311	0.657693
164	-0.773421	2.08878	1.24627	-0.62103	-0.018855	-0.773421	0.0813623	-0.736257	0.446233	-0.184836	4.92578	0.735996	1.77833	1.51024	1.83742	1.50452	7.01133	1.40881	0.228382	1.82172	-0.773421	2.08878	1.43733	-0.62103	-0.018855	-0.773421	0.0813623	0.446233	-0.184836	4.92578	0.735996	1.77833	1.51024	1.89774	1.75793	0.371856	-0.196413	1.35839	0.228382	1.82172	0.228382	1.82172	2.78686	0.501111	3.04068	4.40247	2.27012	1.7549	0.658421
165	-0.80608	1.9481	1.43733	-0.6551	0.0152256	-0.80608	0.0954726	-0.749858	0.422305	-0.182835	4.87656	0.702171	1.70342	1.5022	1.83421	1.44816	6.96523	1.35839	0.247439	1.81975	-0.80608	1.9481	1.50392	-0.6551	0.0152256	-0.80608	0.0954726	0.422305	-0.182835	4.87656	0.702171	1.70342	1.5022	1.8705	1.74815	0.362928	-0.182034	1.41583	0.247439	1.81975	0.247439	1.81975	2.729	0.497531	2.96296	4.60941	2.23277	1.78015	0.653646
166	-0.832853	2.04063	1.50392	-0.609195	-0.00513909	-0.832853	0.045011	-0.756862	0.427794	-0.174959	4.92886	0.735395	1.71945	1.43073	1.75793	1.40306	6.92071	1.41583	0.192064	1.78109	-0.832853	2.04063	1.42162	-0.609195	-0.00513909	-0.832853	0.045011	0.427794	-0.174959	4.92886	0.735395	1.71945	1.43073	1.81767	1.81935	0.352233	-0.214536	1.38428	0.192064	1.78109	0.192064	1.78109	2.81692	0.491039	2.94326	4.39539	2.27269	1.7476	0.6469
167	-0.79215	2.13158	1.42162	-0.603494	-0.0476617	-0.79215	0.0108637	-0.769993	0.39053	-0.213639	4.81489	0.709251	1.76565	1.46479	1.74815	1.42525	6.85748	1.38428	0.203611	1.75029	-0.79215	2.13158	1.25835	-0.603494	-0.0476617	-0.79215	0.0108637	0.39053	-0.213639	4.81489	0.709251	1.76565	1.46479	1.87798	1.89774	0.358846	-0.205293	1.35473	0.203611	1.75029	0.203611	1.75029	2.79	0.494096	3.16085	4.73362	2.27764	1.78005	0.654525
168	-0.795976	2.03483	1.25835	-0.620598	-0.0279415	-0.795976	0.0643978	-0.756544	0.400534	-0.185731	4.91755	0.696093	1.68892	1.40993	1.81935	1.42736	6.83469	1.35473	0.22618	1.80787	-0.795976	2.03483	1.23707	-0.620598	-0.0279415	-0.795976	0.0643978	0.400534	-0.185731	4.91755	0.696093	1.68892	1.40993	1.86911	1.8705	0.391133	-0.213422	1.4169	0.22618	1.80787	0.22618	1.80787	2.77933	0.49382	2.81975	4.38748	2.2705	1.7414	0.647716
169	-0.780054	2.16418	1.23707	-0.598817	-0.0603246	-0.780054	0.129486	-0.77637	0.405492	-0.185264	4.85278	0.695769	1.82342	1.49355	1.89774	1.45663	6.72187	1.4169	0.204398	1.79544	-0.780054	2.16418	1.39687	-0.598817	-0.0603246	-0.780054	0.129486	0.405492	-0.185264	4.85278	0.695769	1.82342	1.49355	1.82438	1.81767	0.361367	-0.197812	1.34322	0.204398	1.79544	0.204398	1.79544	2.74745	0.494004	2.92474	4.45654	2.29767	1.7113	0.64974
170	-0.828486	2.0387	1.39687	-0.607715	-0.0459733	-0.828486	0.00498734	-0.781082	0.425472	-0.196082	4.89671	0.697952	1.80734	1.48078	1.8705	1.48698	6.81129	1.34322	0.17928	1.7522	-0.828486	2.0387	1.32034	-0.607715	-0.0459733	-0.828486	0.00498734	0.425472	-0.196082	4.89671	0.697952	1.80734	1.48078	1.94084	1.87798	0.375438	-0.172808	1.36342	0.17928	1.7522	0.17928	1.7522	2.71426	0.494356	3.10882	4.53328	2.27959	1.72191	0.649266
171	-0.782519	1.97821	1.32034	-0.632272	-0.0380149	-0.782519	0.190096	-0.781322	0.301123	-0.169587	4.93754	0.677438	1.68945	1.41166	1.81767	1.42254	6.79535	1.36342	0.176254	1.73675	-0.782519	1.97821	1.3156	-0.632272	-0.0380149	-0.782519	0.190096	0.301123	-0.169587	4.93754	0.677438	1.68945	1.41166	1.73958	1.86911	0.34705	-0.193226	1.39431	0.176254	1.73675	0.176254	1.73675	2.71033	0.4892	2.83295	4.40992	2.25667	1.7302	0.643128
172	-0.803324	2.11909	1.3156	-0.612586	-0.111222	-0.803324	-0.00805708	-0.744206	0.383652	-0.230431	4.87085	0.715889	1.77178	1.38484	1.87798	1.398	6.80691	1.39431	0.134956	1.73811	-0.803324	2.11909	1.35023	-0.612586	-0.111222	-0.803324	-0.00805708	0.383652	-0.230431	4.87085	0.715889	1.77178	1.38484	1.79998	1.82438	0.388238	-0.217524	1.39713	0.134956	1.73811	0.134956	1.73811	2.74543	0.48473	2.82636	4.56191	2.23453	1.68602	0.637086
173	-0.791336	2.13903	1.35023	-0.584604	-0.0623926	-0.791336	0.0339327	-0.778202	0.344483	-0.21587	4.83426	0.711829	1.73831	1.45163	1.86911	1.4211	6.7866	1.39713	0.143055	1.65984	-0.791336	2.13903	1.45441	-0.584604	-0.0623926	-0.791336	0.0339327	0.344483	-0.21587	4.83426	0.711829	1.73831	1.45163	1.71067	1.94084	0.322821	-0.212185	1.43043	0.143055	1.65984	0.143055	1.65984	2.78885	0.483604	2.76456	4.33562	2.23432	1.73866	0.637076
174	-0.804286	2.09428	1.45441	-0.552502	-0.0432798	-0.804286	0.0841761	-0.755104	0.34399	-0.218686	4.87783	0.700883	1.77254	1.47316	1.82438	1.37413	6.76736	1.43043	0.124932	1.67386	-0.804286	2.09428	1.34278	-0.552502	-0.0432798	-0.804286	0.0841761	0.34399	-0.218686	4.87783	0.700883	1.77254	1.47316	1.80985	1.73958	0.360921	-0.222678	1.50778	0.124932	1.67386	0.124932	1.67386	2.7763	0.489433	2.75983	4.48575	2.25883	1.72172	0.645874
175	-0.789576	1.98832	1.34278	-0.613178	-0.106385	-0.789576	-0.0365155	-0.767956	0.281739	-0.237299	4.83108	0.697655	1.73941	1.4762	1.94084	1.44773	6.54392	1.50778	0.143642	1.70386	-0.789576	1.98832	1.42678	-0.613178	-0.106385	-0.789576	-0.0365155	0.281739	-0.237299	4.83108	0.697655	1.73941	1.4762	1.82112	1.79998	0.382208	-0.223575	1.28325	0.143642	1.70386	0.143642	1.70386	2.76864	0.471659	3.0859	4.49322	2.24879	1.681	0.627748
176	-0.774699	2.08346	1.42678	-0.589384	-0.0481263	-0.774699	-0.0678491	-0.770576	0.305451	-0.239465	4.83738	0.689485	1.74099	1.44563	1.73958	1.45157	6.80081	1.28325	0.159948	1.70882	-0.774699	2.08346	1.39999	-0.589384	-0.0481263	-0.774699	-0.0678491	0.305451	-0.239465	4.83738	0.689485	1.74099	1.44563	1.77318	1.71067	0.337724	-0.237335	1.33072	0.159948	1.70882	0.159948	1.70882	2.72791	0.479957	2.70936	4.5419	2.28874	1.70422	0.634879
177	-0.812464	2.01427	1.39999	-0.574966	-0.0901175	-0.812464	-0.0273912	-0.75863	0.263342	-0.215128	4.85024	0.68494	1.73573	1.46467	1.79998	1.45846	6.72003	1.33072	0.187929	1.69559	-0.812464	2.01427	1.43931	-0.574966	-0.0901175	-0.812464	-0.0273912	0.263342	-0.215128	4.85024	0.68494	1.73573	1.46467	1.83229	1.80985	0.332958	-0.211318	1.30149	0.187929	1.69559	0.187929	1.69559	2.69461	0.476477	2.64024	4.40582	2.22173	1.68386	0.631509
178	-0.791801	1.99484	1.43931	-0.654428	-0.0276766	-0.791801	-0.00359856	-0.766134	0.31817	-0.239343	4.82608	0.679192	1.75048	1.55193	1.71067	1.42717	6.63423	1.30149	0.182234	1.70483	-0.791801	1.99484	1.4006	-0.654428	-0.0276766	-0.791801	-0.00359856	0.31817	-0.239343	4.82608	0.679192	1.75048	1.55193	1.77725	1.82112	0.360245	-0.2101	1.41436	0.182234	1.70483	0.182234	1.70483	2.67392	0.479756	2.97191	4.59652	2.23572	1.68616	0.635797
179	-0.813975	2.0575	1.4006	-0.599523	-0.051579	-0.813975	0.0134395	-0.797294	0.240637	-0.225697	4.91528	0.701794	1.75462	1.48803	1.80985	1.42365	6.80959	1.41436	0.174262	1.64701	-0.813975	2.0575	1.34583	-0.599523	-0.051579	-0.813975	0.0134395	0.240637	-0.225697	4.91528	0.701794	1.75462	1.48803	1.79749	1.77318	0.342019	-0.184898	1.28369	0.174262	1.64701	0.174262	1.64701	2.73421	0.482057	2.96835	4.59911	2.26758	1.67966	0.639546
180	-0.800078	1.98729	1.34583	-0.623602	-0.0781378	-0.800078	-0.0355945	-0.764449	0.320514	-0.244708	4.85341	0.693832	1.76355	1.47336	1.82112	1.46079	6.68222	1.28369	0.150172	1.64887	-0.800078	1.98729	1.40197	-0.623602	-0.0781378	-0.800078	-0.0355945	0.320514	-0.244708	4.85341	0.693832	1.76355	1.47336	1.78061	1.83229	0.333867	-0.217988	1.17113	0.150172	1.64887	0.150172	1.64887	2.685	0.473865	2.80145	4.7873	2.31642	1.62592	0.632288
181	-0.804245	2.07213	1.40197	-0.573372	-0.0559609	-0.804245	-0.0151012	-0.7826	0.33052	-0.230076	4.8974	0.691837	1.81554	1.50557	1.77318	1.40784	6.6819	1.17113	0.117404	1.68551	-0.804245	2.07213	1.42846	-0.573372	-0.0559609	-0.804245	-0.0151012	0.33052	-0.230076	4.8974	0.691837	1.81554	1.50557	1.74116	1.77725	0.335741	-0.204401	1.22373	0.117404	1.68551	0.117404	1.68551	2.75486	0.479383	2.90627	4.50273	2.20858	1.75324	0.637089
182	-0.81082	2.11749	1.42846	-0.571369	-0.128704	-0.81082	-0.0288803	-0.783061	0.2945	-0.250368	4.83708	0.675957	1.77998	1.50211	1.83229	1.43046	6.63757	1.22373	0.13083	1.70034	-0.81082	2.11749	1.41925	-0.571369	-0.128704	-0.81082	-0.0288803	0.2945	-0.250368	4.83708	0.675957	1.77998	1.50211	1.64724	1.79749	0.352575	-0.21797	1.22384	0.13083	1.70034	0.13083	1.70034	2.72168	0.469566	2.75325	4.38388	2.3105	1.6989	0.623439
183	-0.779042	2.00213	1.41925	-0.601457	-0.138805	-0.779042	0.0125699	-0.785172	0.257543	-0.264685	4.80665	0.669671	1.72724	1.4794	1.77725	1.38672	6.6035	1.22384	0.105785	1.64884	-0.779042	2.00213	1.36972	-0.601457	-0.138805	-0.779042	0.0125699	0.257543	-0.264685	4.80665	0.669671	1.72724	1.4794	1.78737	1.78061	0.315342	-0.197478	1.35049	0.105785	1.64884	0.105785	1.64884	2.71143	0.464761	2.91279	4.46495	2.312	1.73109	0.621424
184	-0.812024	2.01948	1.36972	-0.68133	-0.135875	-0.812024	0.0100873	-0.788443	0.194593	-0.232828	4.87859	0.64991	1.72101	1.44076	1.79749	1.42142	6.61984	1.35049	0.135471	1.65716	-0.812024	2.01948	1.58332	-0.68133	-0.135875	-0.812024	0.0100873	0.194593	-0.232828	4.87859	0.64991	1.72101	1.44076	1.82309	1.74116	0.357061	-0.182016	1.21493	0.135471	1.65716	0.135471	1.65716	2.68586	0.465917	2.89984	4.56891	2.25523	1.66742	0.621573
185	-0.781216	2.15559	1.58332	-0.668061	-0.0690984	-0.781216	0.0283052	-0.773804	0.25093	-0.231568	4.88946	0.699757	1.73764	1.50232	1.78061	1.39652	6.65141	1.21493	0.131599	1.71766	-0.781216	2.15559	1.41522	-0.668061	-0.0690984	-0.781216	0.0283052	0.25093	-0.231568	4.88946	0.699757	1.73764	1.50232	1.68123	1.64724	0.34	-0.209685	1.11018	0.131599	1.71766	0.131599	1.71766	2.69413	0.47389	2.87689	4.51034	2.22511	1.68203	0.629037
186	-0.80222	2.236	1.41522	-0.678883	-0.0719627	-0.80222	-0.0132503	-0.783648	0.289655	-0.214297	4.89577	0.694005	1.77405	1.49801	1.74116	1.43077	6.64962	1.11018	0.143652	1.68826	-0.80222	2.236	1.44413	-0.678883	-0.0719627	-0.80222	-0.0132503	0.289655	-0.214297	4.89577	0.694005	1.77405	1.49801	1.76206	1.78737	0.339472	-0.218514	1.14854	0.143652	1.68826	0.143652	1.68826	2.66291	0.476731	2.89052	4.48687	2.25634	1.66777	0.63295
187	-0.814198	2.1332	1.44413	-0.565179	-0.123705	-0.814198	-0.0718833	-0.781278	0.188166	-0.25913	4.85207	0.691085	1.75932	1.48651	1.64724	1.40383	6.70309	1.14854	0.112948	1.65881	-0.814198	2.1332	1.55498	-0.565179	-0.123705	-0.814198	-0.0718833	0.188166	-0.25913	4.85207	0.691085	1.75932	1.48651	1.74202	1.82309	0.357486	-0.185103	1.19196	0.112948	1.65881	0.112948	1.65881	2.70133	0.47241	2.73108	4.40403	2.26114	1.6877	0.626069
188	-0.793926	2.04911	1.55498	-0.665648	-0.0796653	-0.793926	-0.0387295	-0.7922	0.345337	-0.22801	4.87669	0.665495	1.71117	1.47364	1.78737	1.39277	6.69209	1.19196	0.161132	1.6692	-0.793926	2.04911	1.44165	-0.665648	-0.0796653	-0.793926	-0.0387295	0.345337	-0.22801	4.87669	0.665495	1.71117	1.47364	1.82204	1.68123	0.334555	-0.205	1.06067	0.161132	1.6692	0.161132	1.6692	2.69685	0.468937	2.76746	4.36138	2.19696	1.63003	0.622672
189	-0.79083	2.00744	1.44165	-0.638008	-0.119987	-0.79083	0.013253	-0.806908	0.159393	-0.229898	4.9339	0.668637	1.75451	1.56914	1.82309	1.33656	6.52017	1.06067	0.0991528	1.68341	-0.79083	2.00744	1.45229	-0.638008	-0.119987	-0.79083	0.013253	0.159393	-0.229898	4.9339	0.668637	1.75451	1.56914	1.76604	1.76206	0.342396	-0.180816	1.042	0.0991528	1.68341	0.0991528	1.68341	2.65851	0.468926	3.009	4.52815	2.24155	1.62554	0.626833
190	-0.788016	2.12892	1.45229	-0.625741	-0.116534	-0.788016	-0.0199326	-0.770145	0.211364	-0.248794	4.83864	0.700198	1.71777	1.53069	1.68123	1.35205	6.64041	1.042	0.0868651	1.67691	-0.788016	2.12892	1.55053	-0.625741	-0.116534	-0.788016	-0.0199326	0.211364	-0.248794	4.83864	0.700198	1.71777	1.53069	1.75453	1.74202	0.339829	-0.172333	1.12902	0.0868651	1.67691	0.0868651	1.67691	2.65954	0.468604	2.88926	4.4664	2.2312	1.63382	0.626638
191	-0.819545	2.02278	1.55053	-0.584775	-0.0887897	-0.819545	-0.0660179	-0.775204	0.207394	-0.259574	4.85866	0.66865	1.77328	1.51069	1.76206	1.35718	6.61495	1.12902	0.127308	1.67892	-0.819545	2.02278	1.49501	-0.584775	-0.0887897	-0.819545	-0.0660179	0.207394	-0.259574	4.85866	0.66865	1.77328	1.51069	1.6191	1.82204	0.336435	-0.210291	1.00098	0.127308	1.67892	0.127308	1.67892	2.58019	0.465611	2.67719	4.38024	2.24473	1.68207	0.621084
192	-0.814116	2.1856	1.49501	-0.668812	-0.15163	-0.814116	-0.0841941	-0.79556	0.215527	-0.271725	4.8221	0.682594	1.78012	1.49603	1.74202	1.421	6.68008	1.00098	0.115112	1.65085	-0.814116	2.1856	1.58911	-0.668812	-0.15163	-0.814116	-0.0841941	0.215527	-0.271725	4.8221	0.682594	1.78012	1.49603	1.65659	1.76604	0.336461	-0.173427	1.05578	0.115112	1.65085	0.115112	1.65085	2.66488	0.459799	2.71077	4.47746	2.21091	1.63789	0.61679
193	-0.792672	2.22616	1.58911	-0.666184	-0.119987	-0.792672	-0.108307	-0.768646	0.229152	-0.283437	4.78411	0.679142	1.75704	1.46473	1.82204	1.37485	6.61511	1.05578	0.122328	1.64721	-0.792672	2.22616	1.53344	-0.666184	-0.119987	-0.792672	-0.108307	0.229152	-0.283437	4.78411	0.679142	1.75704	1.46473	1.73694	1.75453	0.326073	-0.214473	0.970636	0.122328	1.64721	0.122328	1.64721	2.6423	0.464985	2.59454	4.44203	2.17604	1.69088	0.620095
194	-0.803324	2.13504	1.53344	-0.596609	-0.131359	-0.803324	-0.0331327	-0.806683	0.239055	-0.245141	4.89112	0.684053	1.77632	1.51747	1.76604	1.33411	6.3746	0.970636	0.106087	1.62812	-0.803324	2.13504	1.5445	-0.596609	-0.131359	-0.803324	-0.0331327	0.239055	-0.245141	4.89112	0.684053	1.77632	1.51747	1.70491	1.6191	0.340174	-0.200224	0.989473	0.106087	1.62812	0.106087	1.62812	2.64025	0.463158	2.76814	4.59797	2.29595	1.64709	0.618769
195	-0.772939	2.22383	1.5445	-0.641115	-0.144715	-0.772939	-0.115693	-0.777546	0.214817	-0.270539	4.88544	0.705026	1.83196	1.51443	1.75453	1.42782	6.46225	0.989473	0.125657	1.64341	-0.772939	2.22383	1.50794	-0.641115	-0.144715	-0.772939	-0.115693	0.214817	-0.270539	4.88544	0.705026	1.83196	1.51443	1.64992	1.65659	0.329741	-0.192707	0.942147	0.125657	1.64341	0.125657	1.64341	2.60566	0.467358	2.61429	4.51927	2.20448	1.6267	0.621848
196	-0.809965	2.11229	1.50794	-0.635391	-0.177752	-0.809965	0.0028151	-0.793277	0.233842	-0.222596	4.89205	0.663821	1.80372	1.51012	1.6191	1.48248	6.62834	0.942147	0.125179	1.62876	-0.809965	2.11229	1.51139	-0.635391	-0.177752	-0.809965	0.0028151	0.233842	-0.222596	4.89205	0.663821	1.80372	1.51012	1.63252	1.73694	0.315124	-0.238152	0.996501	0.125179	1.62876	0.125179	1.62876	2.61002	0.46284	2.63733	4.47156	2.22242	1.68979	0.617863
197	-0.78457	2.13539	1.51139	-0.676846	-0.186383	-0.78457	-0.0453394	-0.801579	0.108422	-0.249594	4.93189	0.673281	1.75949	1.57132	1.65659	1.42324	6.54632	0.996501	0.0882581	1.62376	-0.78457	2.13539	1.50867	-0.676846	-0.186383	-0.78457	-0.0453394	0.108422	-0.249594	4.93189	0.673281	1.75949	1.57132	1.63204	1.70491	0.316939	-0.213292	0.980477	0.0882581	1.62376	0.0882581	1.62376	2.63691	0.460613	2.74412	4.39007	2.20118	1.65259	0.616006
198	-0.775688	2.14701	1.50867	-0.606395	-0.0889135	-0.775688	-0.0145321	-0.809519	0.104607	-0.237029	4.92555	0.6635	1.81651	1.58121	1.73694	1.51354	6.40386	0.980477	0.124455	1.57451	-0.775688	2.14701	1.58706	-0.606395	-0.0889135	-0.775688	-0.0145321	0.104607	-0.237029	4.92555	0.6635	1.81651	1.58121	1.70721	1.64992	0.34147	-0.185258	0.905672	0.124455	1.57451	0.124455	1.57451	2.61693	0.463726	2.52696	4.59017	2.21599	1.60803	0.621954
199	-0.795081	2.24218	1.58706	-0.622623	-0.15144	-0.795081	-0.00802638	-0.808128	0.202325	-0.23983	4.92758	0.691224	1.76685	1.50453	1.70491	1.45228	6.44182	0.905672	0.141064	1.5916	-0.795081	2.24218	1.63541	-0.622623	-0.15144	-0.795081	-0.00802638	0.202325	-0.23983	4.92758	0.691224	1.76685	1.50453	1.64393	1.63252	0.358076	-0.231105	0.89192	0.141064	1.5916	0.141064	1.5916	2.587	0.459339	2.44293	4.35562	2.10909	1.63831	0.613574
200	-0.822318	2.1922	1.63541	-0.612632	-0.148452	-0.822318	0.0229256	-0.804528	0.163631	-0.234112	4.87122	0.665608	1.80031	1.54582	1.64992	1.38292	6.36209	0.89192	0.112992	1.57518	-0.822318	2.1922	1.60338	-0.612632	-0.148452	-0.822318	0.0229256	0.163631	-0.234112	4.87122	0.665608	1.80031	1.54582	1.59753	1.63204	0.342942	-0.216788	1.04684	0.112992	1.57518	0.112992	1.57518	2.59543	0.460747	2.48428	4.57126	2.13905	1.63456	0.614459
201	-0.807732	2.11125	1.60338	-0.585071	-0.18683	-0.807732	0.0121466	-0.831843	0.138469	-0.248845	4.88554	0.648082	1.78194	1.55276	1.63252	1.4532	6.42266	1.04684	0.0823624	1.56939	-0.807732	2.11125	1.50758	-0.585071	-0.18683	-0.807732	0.0121466	0.138469	-0.248845	4.88554	0.648082	1.78194	1.55276	1.74408	1.70721	0.339123	-0.202743	0.92514	0.0823624	1.56939	0.0823624	1.56939	2.53398	0.454269	2.59478	4.49146	2.10435	1.63935	0.609468
202	-0.792955	2.17271	1.50758	-0.530074	-0.161712	-0.792955	-0.0313947	-0.837192	0.189379	-0.239928	4.93509	0.64502	1.84918	1.56249	1.63204	1.49182	6.20531	0.92514	0.0906714	1.60376	-0.792955	2.17271	1.50482	-0.530074	-0.161712	-0.792955	-0.0313947	0.189379	-0.239928	4.93509	0.64502	1.84918	1.56249	1.75645	1.64393	0.362175	-0.215112	1.03631	0.0906714	1.60376	0.0906714	1.60376	2.59585	0.461065	2.77073	4.52174	2.25303	1.64964	0.619794
203	-0.783765	2.18159	1.50482	-0.683606	-0.149116	-0.783765	-0.0318081	-0.794595	0.126192	-0.249198	4.93362	0.724699	1.78685	1.58449	1.70721	1.49426	6.4581	1.03631	0.116349	1.5341	-0.783765	2.18159	1.55064	-0.683606	-0.149116	-0.783765	-0.0318081	0.126192	-0.249198	4.93362	0.724699	1.78685	1.58449	1.74394	1.59753	0.316045	-0.201926	0.988983	0.116349	1.5341	0.116349	1.5341	2.54657	0.464121	2.49984	4.3811	2.22348	1.63258	0.618085
204	-0.776128	2.09489	1.55064	-0.618446	-0.141376	-0.776128	0.0355051	-0.856675	0.0915575	-0.220895	4.97278	0.640166	1.76783	1.5632	1.64393	1.45314	6.32198	0.988983	0.125401	1.55662	-0.776128	2.09489	1.63007	-0.618446	-0.141376	-0.776128	0.0355051	0.0915575	-0.220895	4.97278	0.640166	1.76783	1.5632	1.68986	1.74408	0.339953	-0.199328	0.917104	0.125401	1.55662	0.125401	1.55662	2.55623	0.462028	2.62508	4.52112	2.13842	1.6355	0.620005
205	-0.770407	2.19959	1.63007	-0.678849	-0.16987	-0.770407	-0.103125	-0.804611	0.146354	-0.272687	4.87117	0.676596	1.83592	1.50862	1.59753	1.49613	6.22596	0.917104	0.112882	1.51553	-0.770407	2.19959	1.59488	-0.678849	-0.16987	-0.770407	-0.103125	0.146354	-0.272687	4.87117	0.676596	1.83592	1.50862	1.69638	1.75645	0.333271	-0.215198	0.791826	0.112882	1.51553	0.112882	1.51553	2.54399	0.458274	2.59894	4.47578	2.17218	1.57457	0.614068
206	-0.811185	2.24893	1.59488	-0.656226	-0.164994	-0.811185	-0.0532323	-0.838122	0.172443	-0.239597	4.98681	0.665477	1.78079	1.5402	1.74408	1.45063	6.51731	0.791826	0.0553435	1.57654	-0.811185	2.24893	1.57516	-0.656226	-0.164994	-0.811185	-0.0532323	0.172443	-0.239597	4.98681	0.665477	1.78079	1.5402	1.73056	1.74394	0.360425	-0.234897	0.734135	0.0553435	1.57654	0.0553435	1.57654	2.57397	0.460109	2.75118	4.50075	2.18882	1.63308	0.616332
207	-0.79288	2.09517	1.57516	-0.655145	-0.199151	-0.79288	-0.0745841	-0.829727	0.146592	-0.272025	4.82326	0.661432	1.7567	1.52192	1.75645	1.43454	6.24234	0.734135	0.12872	1.57542	-0.79288	2.09517	1.53528	-0.655145	-0.199151	-0.79288	-0.0745841	0.146592	-0.272025	4.82326	0.661432	1.7567	1.52192	1.79097	1.68986	0.326026	-0.206251	0.773782	0.12872	1.57542	0.12872	1.57542	2.54549	0.448301	2.41266	4.34647	2.09651	1.61401	0.600343
208	-0.787484	2.23688	1.53528	-0.624921	-0.228716	-0.787484	-0.150059	-0.808813	0.116936	-0.280011	4.92439	0.695731	1.83738	1.53598	1.74394	1.49194	6.30006	0.773782	0.0903592	1.60744	-0.787484	2.23688	1.61754	-0.624921	-0.228716	-0.787484	-0.150059	0.116936	-0.280011	4.92439	0.695731	1.83738	1.53598	1.7112	1.69638	0.329771	-0.20815	0.816923	0.0903592	1.60744	0.0903592	1.60744	2.54326	0.453268	2.44876	4.48908	2.23078	1.63009	0.610482
209	-0.785044	2.07585	1.61754	-0.613861	-0.190434	-0.785044	-0.0470664	-0.828963	0.205606	-0.244739	4.95229	0.640714	1.81182	1.5865	1.68986	1.42172	6.3904	0.816923	0.0881579	1.59188	-0.785044	2.07585	1.65943	-0.613861	-0.190434	-0.785044	-0.0470664	0.205606	-0.244739	4.95229	0.640714	1.81182	1.5865	1.7483	1.73056	0.349069	-0.175215	0.803499	0.0881579	1.59188	0.0881579	1.59188	2.54087	0.461744	2.50343	4.27282	2.15443	1.58842	0.615328
210	-0.807599	2.12431	1.65943	-0.64957	-0.170629	-0.807599	-0.024515	-0.853305	0.114345	-0.251279	4.91445	0.628206	1.77951	1.56401	1.69638	1.416	6.43559	0.803499	0.0970819	1.55462	-0.807599	2.12431	1.6205	-0.64957	-0.170629	-0.807599	-0.024515	0.114345	-0.251279	4.91445	0.628206	1.77951	1.56401	1.79322	1.79097	0.328422	-0.213057	0.696818	0.0970819	1.55462	0.0970819	1.55462	2.54315	0.461146	2.44397	4.40329	2.16961	1.63426	0.617617
211	-0.798476	2.08198	1.6205	-0.667083	-0.180266	-0.798476	-0.0706837	-0.806404	0.119886	-0.263224	4.92967	0.626859	1.74907	1.57064	1.73056	1.48191	6.29146	0.696818	0.114478	1.60003	-0.798476	2.08198	1.65231	-0.667083	-0.180266	-0.798476	-0.0706837	0.119886	-0.263224	4.92967	0.626859	1.74907	1.57064	1.75295	1.7112	0.340853	-0.183649	0.826442	0.114478	1.60003	0.114478	1.60003	2.54883	0.458478	2.35971	4.29294	2.20293	1.60465	0.612942
212	-0.813303	2.28183	1.65231	-0.630122	-0.174783	-0.813303	-0.0562631	-0.828963	0.0322157	-0.255517	4.95686	0.684459	1.88554	1.5547	1.79097	1.42731	6.27528	0.826442	0.119521	1.57938	-0.813303	2.28183	1.66288	-0.630122	-0.174783	-0.813303	-0.0562631	0.0322157	-0.255517	4.95686	0.684459	1.88554	1.5547	1.79452	1.7483	0.360275	-0.196729	0.681969	0.119521	1.57938	0.119521	1.57938	2.51807	0.457129	2.51822	4.34357	2.22793	1.63299	0.612544
213	-0.795761	2.28901	1.66288	-0.523451	-0.209385	-0.795761	-0.0929346	-0.825397	0.0158265	-0.265176	4.95151	0.683501	1.92066	1.63333	1.7112	1.46411	6.23272	0.681969	0.108783	1.58177	-0.795761	2.28901	1.77557	-0.523451	-0.209385	-0.795761	-0.0929346	0.0158265	-0.265176	4.95151	0.683501	1.92066	1.63333	1.74724	1.79322	0.354243	-0.196246	0.658757	0.108783	1.58177	0.108783	1.58177	2.50108	0.467797	2.64672	4.29745	2.18463	1.59542	0.624784
214	-0.797695	2.19043	1.77557	-0.599488	-0.249783	-0.797695	-0.090587	-0.847668	0.00173951	-0.266261	4.90901	0.655107	1.83032	1.60385	1.7483	1.4312	6.35593	0.658757	0.113938	1.59252	-0.797695	2.19043	1.62641	-0.599488	-0.249783	-0.797695	-0.090587	0.00173951	-0.266261	4.90901	0.655107	1.83032	1.60385	1.71153	1.75295	0.345108	-0.212277	0.720711	0.113938	1.59252	0.113938	1.59252	2.53739	0.457013	2.71011	4.62771	2.18179	1.61845	0.618535
215	-0.808355	2.11463	1.62641	-0.620234	-0.180825	-0.808355	-0.0886834	-0.855299	0.066313	-0.238874	4.9853	0.617686	1.78096	1.61414	1.79322	1.38595	6.3403	0.720711	0.126721	1.58266	-0.808355	2.11463	1.70174	-0.620234	-0.180825	-0.808355	-0.0886834	0.066313	-0.238874	4.9853	0.617686	1.78096	1.61414	1.82563	1.79452	0.342963	-0.198931	0.641231	0.126721	1.58266	0.126721	1.58266	2.51468	0.456241	2.38774	4.30022	2.0977	1.60206	0.611472
216	-0.799222	2.07376	1.70174	-0.663851	-0.233962	-0.799222	-0.135752	-0.816263	0.0560717	-0.274272	4.90442	0.640077	1.81226	1.5595	1.75295	1.43427	6.34523	0.641231	0.150337	1.61927	-0.799222	2.07376	1.67151	-0.663851	-0.233962	-0.799222	-0.135752	0.0560717	-0.274272	4.90442	0.640077	1.81226	1.5595	1.71785	1.74724	0.359735	-0.19989	0.595516	0.150337	1.61927	0.150337	1.61927	2.50384	0.455562	2.47466	4.65935	2.18382	1.59172	0.614934
217	-0.815527	2.28157	1.67151	-0.600285	-0.224135	-0.815527	-0.071232	-0.8339	0.0626222	-0.250139	4.99076	0.679313	1.90642	1.63237	1.79452	1.46373	6.35098	0.595516	0.137891	1.61395	-0.815527	2.28157	1.71056	-0.600285	-0.224135	-0.815527	-0.071232	0.0626222	-0.250139	4.99076	0.679313	1.90642	1.63237	1.76513	1.71153	0.344267	-0.167358	0.578431	0.137891	1.61395	0.137891	1.61395	2.50173	0.465536	2.57604	4.38375	2.07941	1.66607	0.622487
218	-0.833808	2.21418	1.71056	-0.59917	-0.215702	-0.833808	-0.130839	-0.859462	-0.0703859	-0.281902	4.96457	0.649391	1.85773	1.64872	1.74724	1.51664	6.35508	0.578431	0.14145	1.57236	-0.833808	2.21418	1.6553	-0.59917	-0.215702	-0.833808	-0.130839	-0.0703859	-0.281902	4.96457	0.649391	1.85773	1.64872	1.8007	1.82563	0.381453	-0.167828	0.572005	0.14145	1.57236	0.14145	1.57236	2.51778	0.457463	2.45693	4.59625	2.11181	1.6001	0.616031
219	-0.769594	2.22364	1.6553	-0.599306	-0.228261	-0.769594	-0.191727	-0.855896	0.0587043	-0.309681	4.91514	0.655573	1.84223	1.60597	1.71153	1.45317	6.15025	0.572005	0.143486	1.54953	-0.769594	2.22364	1.72242	-0.599306	-0.228261	-0.769594	-0.191727	0.0587043	-0.309681	4.91514	0.655573	1.84223	1.60597	1.78445	1.71785	0.330051	-0.186489	0.514808	0.143486	1.54953	0.143486	1.54953	2.50331	0.446525	2.65713	4.39612	2.07636	1.64235	0.604014
220	-0.829109	2.10871	1.72242	-0.65906	-0.261165	-0.829109	-0.12552	-0.841168	-0.00130604	-0.268985	4.98917	0.649391	1.80493	1.60898	1.82563	1.43574	6.312	0.514808	0.109801	1.58669	-0.829109	2.10871	1.80261	-0.65906	-0.261165	-0.829109	-0.12552	-0.00130604	-0.268985	4.98917	0.649391	1.80493	1.60898	1.67576	1.76513	0.330671	-0.219931	0.484812	0.109801	1.58669	0.109801	1.58669	2.50801	0.454651	2.34413	4.44333	2.13099	1.60851	0.608258
221	-0.778934	2.06356	1.80261	-0.680192	-0.252818	-0.778934	-0.238433	-0.888187	0.000165116	-0.318344	4.9089	0.609971	1.77018	1.58876	1.71785	1.43234	6.19924	0.484812	0.0961082	1.52076	-0.778934	2.06356	1.73825	-0.680192	-0.252818	-0.778934	-0.238433	0.000165116	-0.318344	4.9089	0.609971	1.77018	1.58876	1.62686	1.8007	0.331568	-0.214151	0.475984	0.0961082	1.52076	0.0961082	1.52076	2.47362	0.439076	2.53672	4.54601	2.13373	1.57017	0.597116
222	-0.829109	2.24035	1.73825	-0.637541	-0.214478	-0.829109	-0.152521	-0.864703	0.0771634	-0.30047	4.94207	0.620793	1.85381	1.65335	1.76513	1.50486	6.12144	0.475984	0.0747964	1.54344	-0.829109	2.24035	1.72606	-0.637541	-0.214478	-0.829109	-0.152521	0.0771634	-0.30047	4.94207	0.620793	1.85381	1.65335	1.6888	1.78445	0.330435	-0.206171	0.556036	0.0747964	1.54344	0.0747964	1.54344	2.48778	0.449988	2.35459	4.60479	2.19959	1.58543	0.607218
223	-0.791411	2.19775	1.72606	-0.598044	-0.270233	-0.791411	-0.214144	-0.840404	-0.0075262	-0.30157	4.92247	0.646547	1.82256	1.61502	1.8007	1.4787	6.02132	0.556036	0.137432	1.55406	-0.791411	2.19775	1.7404	-0.598044	-0.270233	-0.791411	-0.214144	-0.0075262	-0.30157	4.92247	0.646547	1.82256	1.61502	1.63683	1.67576	0.34811	-0.192596	0.579057	0.137432	1.55406	0.137432	1.55406	2.55138	0.444165	2.34352	4.51297	2.18996	1.59357	0.600194
224	-0.775289	2.15148	1.7404	-0.634913	-0.294752	-0.775289	-0.184134	-0.858208	-0.074962	-0.287889	4.98357	0.622007	1.81808	1.62285	1.78445	1.40469	6.24979	0.579057	0.114441	1.5188	-0.775289	2.15148	1.81666	-0.634913	-0.294752	-0.775289	-0.184134	-0.074962	-0.287889	4.98357	0.622007	1.81808	1.62285	1.73962	1.62686	0.358188	-0.200063	0.537472	0.114441	1.5188	0.114441	1.5188	2.45011	0.445096	2.17656	4.342	2.15647	1.60051	0.600527
225	-0.817719	2.15062	1.81666	-0.612096	-0.307017	-0.817719	-0.165266	-0.850048	-0.0182424	-0.290158	4.97246	0.641954	1.82957	1.67048	1.67576	1.4471	6.2041	0.537472	0.132866	1.5806	-0.817719	2.15062	1.7546	-0.612096	-0.307017	-0.817719	-0.165266	-0.0182424	-0.290158	4.97246	0.641954	1.82957	1.67048	1.66742	1.6888	0.33845	-0.177406	0.412796	0.132866	1.5806	0.132866	1.5806	2.49374	0.449522	2.28197	4.5566	2.18332	1.57823	0.60688
226	-0.80197	2.15574	1.7546	-0.60717	-0.304314	-0.80197	-0.165462	-0.878078	0.0130597	-0.281197	4.9674	0.613617	1.83364	1.61651	1.62686	1.43778	6.1941	0.412796	0.0800586	1.55875	-0.80197	2.15574	1.74449	-0.60717	-0.304314	-0.80197	-0.165462	0.0130597	-0.281197	4.9674	0.613617	1.83364	1.61651	1.66272	1.63683	0.378965	-0.213774	0.44126	0.0800586	1.55875	0.0800586	1.55875	2.42236	0.440916	2.29477	4.6201	2.15474	1.61961	0.596684
227	-0.807441	2.17463	1.74449	-0.598715	-0.327828	-0.807441	-0.214165	-0.851136	-0.002261	-0.311697	4.92295	0.632111	1.77162	1.62155	1.6888	1.44103	6.2699	0.44126	0.139752	1.55556	-0.807441	2.17463	1.74355	-0.598715	-0.327828	-0.807441	-0.214165	-0.002261	-0.311697	4.92295	0.632111	1.77162	1.62155	1.68717	1.73962	0.364566	-0.201183	0.381083	0.139752	1.55556	0.139752	1.55556	2.49985	0.44457	2.31356	4.50418	2.08629	1.58767	0.600531
228	-0.797952	2.06167	1.74355	-0.606476	-0.303318	-0.797952	-0.17203	-0.874224	-0.0323397	-0.299204	5.034	0.628925	1.81061	1.69609	1.63683	1.40942	6.22761	0.381083	0.123465	1.51687	-0.797952	2.06167	1.72506	-0.606476	-0.303318	-0.797952	-0.17203	-0.0323397	-0.299204	5.034	0.628925	1.81061	1.69609	1.77855	1.66742	0.350146	-0.202965	0.404266	0.123465	1.51687	0.123465	1.51687	2.46173	0.439673	2.41022	4.51284	2.18066	1.55554	0.597853
229	-0.801622	2.23831	1.72506	-0.606919	-0.316085	-0.801622	-0.223548	-0.866093	-0.0121849	-0.330013	4.87242	0.628407	1.85913	1.70796	1.73962	1.42723	6.07922	0.404266	0.0987032	1.49989	-0.801622	2.23831	1.59843	-0.606919	-0.316085	-0.801622	-0.223548	-0.0121849	-0.330013	4.87242	0.628407	1.85913	1.70796	1.74638	1.66272	0.353882	-0.154086	0.437702	0.0987032	1.49989	0.0987032	1.49989	2.47709	0.436877	2.36978	4.3282	2.08839	1.56622	0.590786
230	-0.833584	2.18032	1.59843	-0.59876	-0.291698	-0.833584	-0.258047	-0.86577	-0.0884631	-0.34088	4.82663	0.625064	1.83249	1.66448	1.66742	1.42308	6.1956	0.437702	0.0966044	1.50203	-0.833584	2.18032	1.75611	-0.59876	-0.291698	-0.833584	-0.258047	-0.0884631	-0.34088	4.82663	0.625064	1.83249	1.66448	1.6992	1.68717	0.343261	-0.199067	0.461106	0.0966044	1.50203	0.0966044	1.50203	2.44605	0.436185	2.06083	4.36974	2.13979	1.62763	0.591661
231	-0.811791	2.26672	1.75611	-0.605122	-0.283845	-0.811791	-0.191448	-0.861857	-0.121654	-0.321852	4.89861	0.631161	1.91784	1.65649	1.66272	1.47189	6.1412	0.461106	0.155031	1.52991	-0.811791	2.26672	1.70245	-0.605122	-0.283845	-0.811791	-0.191448	-0.121654	-0.321852	4.89861	0.631161	1.91784	1.65649	1.67332	1.77855	0.349825	-0.196004	0.348572	0.155031	1.52991	0.155031	1.52991	2.45419	0.438194	2.26732	4.49326	2.08658	1.57114	0.592265
232	-0.809658	2.1833	1.70245	-0.61798	-0.317413	-0.809658	-0.238909	-0.868004	-0.131168	-0.313015	4.96541	0.626942	1.84776	1.68674	1.68717	1.49878	6.12935	0.348572	0.110325	1.5051	-0.809658	2.1833	1.79124	-0.61798	-0.317413	-0.809658	-0.238909	-0.131168	-0.313015	4.96541	0.626942	1.84776	1.68674	1.57451	1.74638	0.36533	-0.219003	0.339195	0.110325	1.5051	0.110325	1.5051	2.43913	0.435779	2.5475	4.62102	2.1944	1.50551	0.59161
233	-0.808886	2.15685	1.79124	-0.584934	-0.339105	-0.808886	-0.279915	-0.85809	-0.0507344	-0.363447	4.83432	0.604875	1.83394	1.69716	1.77855	1.45843	6.09766	0.339195	0.127795	1.51483	-0.808886	2.15685	1.80032	-0.584934	-0.339105	-0.808886	-0.279915	-0.0507344	-0.363447	4.83432	0.604875	1.83394	1.69716	1.62346	1.6992	0.365847	-0.181013	0.278797	0.127795	1.51483	0.127795	1.51483	2.42189	0.4285	2.00841	4.41438	2.0763	1.5923	0.580975
234	-0.805424	2.19791	1.80032	-0.586493	-0.321606	-0.805424	-0.200365	-0.872118	-0.10836	-0.306696	5.00547	0.63133	1.88796	1.64892	1.74638	1.45573	6.05815	0.278797	0.154153	1.51193	-0.805424	2.19791	1.75879	-0.586493	-0.321606	-0.805424	-0.200365	-0.10836	-0.306696	5.00547	0.63133	1.88796	1.64892	1.5841	1.67332	0.375459	-0.190126	0.307178	0.154153	1.51193	0.154153	1.51193	2.42198	0.440737	1.96853	4.22041	2.00806	1.60269	0.589667
235	-0.816374	2.17054	1.75879	-0.658878	-0.284603	-0.816374	-0.246741	-0.876359	-0.111968	-0.31638	4.98111	0.61016	1.86846	1.68926	1.6992	1.43085	6.19497	0.307178	0.117313	1.5401	-0.816374	2.17054	1.7356	-0.658878	-0.284603	-0.816374	-0.246741	-0.111968	-0.31638	4.98111	0.61016	1.86846	1.68926	1.60644	1.57451	0.400276	-0.196407	0.223651	0.117313	1.5401	0.117313	1.5401	2.50102	0.433275	2.04561	4.45625	2.00551	1.56199	0.586145
236	-0.821073	2.17156	1.7356	-0.651243	-0.32282	-0.821073	-0.174172	-0.878803	-0.125255	-0.293106	4.94784	0.60048	1.83226	1.665	1.67332	1.42574	6.19698	0.223651	0.131143	1.55104	-0.821073	2.17156	1.76484	-0.651243	-0.32282	-0.821073	-0.174172	-0.125255	-0.293106	4.94784	0.60048	1.83226	1.665	1.65558	1.62346	0.371203	-0.193623	0.256515	0.131143	1.55104	0.131143	1.55104	2.45226	0.433774	2.16249	4.44539	2.06095	1.55958	0.585753
237	-0.776501	2.22417	1.76484	-0.59125	-0.355326	-0.776501	-0.213358	-0.886806	-0.112482	-0.296212	4.96315	0.622267	1.89853	1.70954	1.57451	1.43261	6.04268	0.256515	0.182846	1.56279	-0.776501	2.22417	1.7572	-0.59125	-0.355326	-0.776501	-0.213358	-0.112482	-0.296212	4.96315	0.622267	1.89853	1.70954	1.68833	1.5841	0.365983	-0.19225	0.273766	0.182846	1.56279	0.182846	1.56279	2.45913	0.441632	2.13882	4.41787	2.07361	1.58952	0.594678
238	-0.798916	2.06302	1.7572	-0.616011	-0.285628	-0.798916	-0.303036	-0.880875	-0.0756511	-0.349218	4.87045	0.59444	1.87257	1.70856	1.62346	1.44951	6.07459	0.273766	0.170375	1.5615	-0.798916	2.06302	1.83411	-0.616011	-0.285628	-0.798916	-0.303036	-0.0756511	-0.349218	4.87045	0.59444	1.87257	1.70856	1.66033	1.60644	0.337441	-0.173861	0.205088	0.170375	1.5615	0.170375	1.5615	2.44327	0.43174	2.11699	4.59871	2.08498	1.57891	0.586801
239	-0.776609	2.08349	1.83411	-0.648477	-0.316389	-0.776609	-0.28546	-0.845601	-0.0967506	-0.311385	4.89824	0.593301	1.7714	1.6897	1.5841	1.47795	6.07804	0.205088	0.13801	1.52788	-0.776609	2.08349	1.70637	-0.648477	-0.316389	-0.776609	-0.28546	-0.0967506	-0.311385	4.89824	0.593301	1.7714	1.6897	1.64354	1.65558	0.377301	-0.172437	0.239615	0.13801	1.52788	0.13801	1.52788	2.40634	0.432189	2.14187	4.64907	2.06587	1.56327	0.586679
240	-0.7832	2.11727	1.70637	-0.617741	-0.349321	-0.7832	-0.223403	-0.878069	-0.132554	-0.337809	4.93803	0.623713	1.87143	1.6887	1.60644	1.38511	6.18072	0.239615	0.167146	1.53992	-0.7832	2.11727	1.76985	-0.617741	-0.349321	-0.7832	-0.223403	-0.132554	-0.337809	4.93803	0.623713	1.87143	1.6887	1.65923	1.68833	0.360006	-0.161449	0.183515	0.167146	1.53992	0.167146	1.53992	2.41184	0.435828	2.18725	4.52596	2.07398	1.5542	0.589757
241	-0.788048	2.31083	1.76985	-0.647624	-0.307804	-0.788048	-0.23924	-0.858453	-0.187013	-0.321651	4.97601	0.655985	1.93764	1.71345	1.65558	1.44767	6.11378	0.183515	0.132389	1.54047	-0.788048	2.31083	1.82946	-0.647624	-0.307804	-0.788048	-0.23924	-0.187013	-0.321651	4.97601	0.655985	1.93764	1.71345	1.68775	1.66033	0.361641	-0.183977	0.0982897	0.132389	1.54047	0.132389	1.54047	2.38959	0.437698	2.06549	4.57341	2.11263	1.52468	0.592337
242	-0.79586	2.13899	1.82946	-0.639635	-0.331129	-0.79586	-0.327812	-0.865697	-0.225593	-0.305541	4.97288	0.600714	1.88477	1.70232	1.68833	1.4671	6.14307	0.0982897	0.116798	1.56759	-0.79586	2.13899	1.89809	-0.639635	-0.331129	-0.79586	-0.327812	-0.225593	-0.305541	4.97288	0.600714	1.88477	1.70232	1.52058	1.64354	0.385092	-0.14663	0.133591	0.116798	1.56759	0.116798	1.56759	2.42868	0.42738	2.22889	4.36102	2.11352	1.54617	0.581444
243	-0.800003	2.07613	1.89809	-0.627072	-0.371877	-0.800003	-0.273957	-0.880674	-0.211413	-0.343509	4.85234	0.571686	1.84702	1.71439	1.66033	1.43517	6.15136	0.133591	0.129307	1.51997	-0.800003	2.07613	1.74592	-0.627072	-0.371877	-0.800003	-0.273957	-0.211413	-0.343509	4.85234	0.571686	1.84702	1.71439	1.54479	1.65923	0.380975	-0.133563	0.124786	0.129307	1.51997	0.129307	1.51997	2.43822	0.427954	2.13269	4.35886	2.13684	1.5203	0.580948
244	-0.857584	2.05784	1.74592	-0.61328	-0.361681	-0.857584	-0.306626	-0.849416	-0.11785	-0.343497	4.89573	0.593741	1.80697	1.70254	1.64354	1.41139	6.10542	0.124786	0.133269	1.48181	-0.857584	2.05784	1.85181	-0.61328	-0.361681	-0.857584	-0.306626	-0.11785	-0.343497	4.89573	0.593741	1.80697	1.70254	1.68137	1.68775	0.364932	-0.18324	0.0923336	0.133269	1.48181	0.133269	1.48181	2.38797	0.424723	2.07932	4.46348	2.06079	1.54727	0.579245
245	-0.813087	2.27156	1.85181	-0.614555	-0.375415	-0.813087	-0.26803	-0.876825	-0.136709	-0.313772	4.99179	0.608776	1.90455	1.70939	1.65923	1.45341	6.16237	0.0923336	0.110625	1.50331	-0.813087	2.27156	1.77366	-0.614555	-0.375415	-0.813087	-0.26803	-0.136709	-0.313772	4.99179	0.608776	1.90455	1.70939	1.73272	1.52058	0.391041	-0.160261	0.0712256	0.110625	1.50331	0.110625	1.50331	2.43002	0.436591	2.18839	4.35298	2.08325	1.56935	0.589827
246	-0.806429	2.23546	1.77366	-0.559342	-0.361367	-0.806429	-0.206645	-0.896504	-0.186951	-0.306626	4.97806	0.605686	1.90256	1.71811	1.68775	1.45575	6.18594	0.0712256	0.127821	1.55734	-0.806429	2.23546	1.8866	-0.559342	-0.361367	-0.806429	-0.206645	-0.186951	-0.306626	4.97806	0.605686	1.90256	1.71811	1.75055	1.54479	0.384322	-0.156141	0.0355724	0.127821	1.55734	0.127821	1.55734	2.38889	0.431212	2.24158	4.37666	2.14062	1.56366	0.586034
247	-0.770191	2.13496	1.8866	-0.62367	-0.406641	-0.770191	-0.359094	-0.855166	-0.151258	-0.365971	4.92591	0.637568	1.88703	1.69255	1.52058	1.48793	6.05694	0.0355724	0.11268	1.4987	-0.770191	2.13496	1.75776	-0.62367	-0.406641	-0.770191	-0.359094	-0.151258	-0.365971	4.92591	0.637568	1.88703	1.69255	1.66267	1.68137	0.356893	-0.141854	0.0224465	0.11268	1.4987	0.11268	1.4987	2.36301	0.429144	2.15639	4.56603	2.01382	1.54122	0.582758
248	-0.809076	2.23074	1.75776	-0.557475	-0.36739	-0.809076	-0.295174	-0.865932	-0.106971	-0.351474	4.86773	0.608164	1.88249	1.68944	1.54479	1.4136	6.05386	0.0224465	0.152014	1.54878	-0.809076	2.23074	1.81714	-0.557475	-0.36739	-0.809076	-0.295174	-0.106971	-0.351474	4.86773	0.608164	1.88249	1.68944	1.73267	1.73272	0.367939	-0.154575	0.0295576	0.152014	1.54878	0.152014	1.54878	2.39672	0.428594	2.08859	4.56737	2.04569	1.57015	0.584577
249	-0.828976	2.13974	1.81714	-0.621519	-0.352812	-0.828976	-0.314932	-0.864032	-0.214931	-0.319408	5.00144	0.597093	1.8653	1.6918	1.68137	1.41101	6.06017	0.0295576	0.15395	1.55316	-0.828976	2.13974	1.88449	-0.621519	-0.352812	-0.828976	-0.314932	-0.214931	-0.319408	5.00144	0.597093	1.8653	1.6918	1.76772	1.75055	0.336815	-0.154544	0.00431894	0.15395	1.55316	0.15395	1.55316	2.36905	0.427795	2.13095	4.26814	2.02975	1.52829	0.58126
250	-0.819762	2.21679	1.88449	-0.636357	-0.375453	-0.819762	-0.263933	-0.870756	-0.177481	-0.324641	4.91257	0.592456	1.81499	1.71734	1.73272	1.46085	6.11843	0.00431894	0.119174	1.4836	-0.819762	2.21679	1.79187	-0.636357	-0.375453	-0.819762	-0.263933	-0.177481	-0.324641	4.91257	0.592456	1.81499	1.71734	1.563	1.66267	0.365829	-0.149705	0.0231562	0.119174	1.4836	0.119174	1.4836	2.40274	0.427091	2.06646	4.42481	2.06158	1.58125	0.581016
251	-0.824153	2.10708	1.79187	-0.600012	-0.357128	-0.824153	-0.202971	-0.887849	-0.161851	-0.30111	5.05604	0.597284	1.86893	1.76962	1.75055	1.46263	6.19239	0.0231562	0.161791	1.51181	-0.824153	2.10708	1.8744	-0.600012	-0.357128	-0.824153	-0.202971	-0.161851	-0.30111	5.05604	0.597284	1.86893	1.76962	1.73507	1.73267	0.386538	-0.168843	-0.0280503	0.161791	1.51181	0.161791	1.51181	2.37843	0.438357	2.21139	4.36324	2.0753	1.56304	0.591051
252	-0.808172	2.15259	1.8744	-0.603892	-0.408272	-0.808172	-0.272384	-0.879749	-0.190982	-0.325671	4.95465	0.604036	1.88049	1.69072	1.66267	1.47472	5.9988	-0.0280503	0.157728	1.55416	-0.808172	2.15259	1.76546	-0.603892	-0.408272	-0.808172	-0.272384	-0.190982	-0.325671	4.95465	0.604036	1.88049	1.69072	1.73373	1.76772	0.362412	-0.138878	-0.137198	0.157728	1.55416	0.157728	1.55416	2.36127	0.429886	2.13395	4.54213	2.08829	1.54159	0.582836
253	-0.791361	2.22818	1.76546	-0.599056	-0.405683	-0.791361	-0.287157	-0.854162	-0.155927	-0.3071	5.01221	0.615402	1.9242	1.71322	1.73267	1.47942	6.10332	-0.137198	0.15583	1.48027	-0.791361	2.22818	1.86664	-0.599056	-0.405683	-0.791361	-0.287157	-0.155927	-0.3071	5.01221	0.615402	1.9242	1.71322	1.72083	1.563	0.370522	-0.139137	-0.0632386	0.15583	1.48027	0.15583	1.48027	2.40898	0.426422	2.11403	4.51115	2.05221	1.51529	0.579914
254	-0.836863	2.13824	1.86664	-0.587858	-0.369079	-0.836863	-0.275561	-0.898443	-0.180452	-0.319193	5.01783	0.602189	1.905	1.73081	1.76772	1.47039	5.81348	-0.0632386	0.0902125	1.52729	-0.836863	2.13824	1.82386	-0.587858	-0.369079	-0.836863	-0.275561	-0.180452	-0.319193	5.01783	0.602189	1.905	1.73081	1.66435	1.73507	0.369306	-0.180641	-0.0353229	0.0902125	1.52729	0.0902125	1.52729	2.33792	0.421961	2.11276	4.58791	2.10888	1.54232	0.575255
255	-0.7856	1.98716	1.82386	-0.589895	-0.413243	-0.7856	-0.298588	-0.860476	-0.110427	-0.317755	4.92692	0.555035	1.80991	1.69075	1.563	1.49213	5.97664	-0.0353229	0.128236	1.49015	-0.7856	1.98716	1.94022	-0.589895	-0.413243	-0.7856	-0.298588	-0.110427	-0.317755	4.92692	0.555035	1.80991	1.69075	1.77668	1.73373	0.390903	-0.15387	-0.148405	0.128236	1.49015	0.128236	1.49015	2.36856	0.425551	1.94898	4.47128	2.03983	1.545	0.576999
256	-0.763567	2.15322	1.94022	-0.656284	-0.370359	-0.763567	-0.334008	-0.851743	-0.179177	-0.345271	4.96586	0.597162	1.89273	1.73006	1.73507	1.41002	5.86131	-0.148405	0.159764	1.50473	-0.763567	2.15322	1.7907	-0.656284	-0.370359	-0.763567	-0.334008	-0.179177	-0.345271	4.96586	0.597162	1.89273	1.73006	1.56919	1.72083	0.392313	-0.153647	-0.128584	0.159764	1.50473	0.159764	1.50473	2.35592	0.418124	2.12941	4.47879	2.06239	1.49109	0.571333
257	-0.793179	1.99415	1.7907	-0.593993	-0.402135	-0.793179	-0.374642	-0.892003	-0.199001	-0.338661	4.95536	0.550355	1.84507	1.65558	1.73373	1.47709	6.02934	-0.128584	0.164167	1.52377	-0.793179	1.99415	1.69763	-0.593993	-0.402135	-0.793179	-0.374642	-0.199001	-0.338661	4.95536	0.550355	1.84507	1.65558	1.63545	1.66435	0.395167	-0.170804	-0.0894071	0.164167	1.52377	0.164167	1.52377	2.32429	0.412415	2.10642	4.43296	2.0744	1.51314	0.56342
258	-0.797978	2.06446	1.69763	-0.61072	-0.403121	-0.797978	-0.319526	-0.896059	-0.184411	-0.341333	4.8758	0.558319	1.88132	1.74551	1.72083	1.50016	5.90322	-0.0894071	0.153225	1.53133	-0.797978	2.06446	1.91151	-0.61072	-0.403121	-0.797978	-0.319526	-0.184411	-0.341333	4.8758	0.558319	1.88132	1.74551	1.68296	1.77668	0.340726	-0.164653	-0.108763	0.153225	1.53133	0.153225	1.53133	2.29303	0.42049	2.1268	4.50082	2.0406	1.49302	0.573335
259	-0.794316	2.05891	1.91151	-0.591215	-0.429035	-0.794316	-0.357967	-0.896377	-0.266138	-0.351014	4.87592	0.548356	1.86196	1.67503	1.66435	1.52324	5.88807	-0.108763	0.147677	1.53992	-0.794316	2.05891	1.8578	-0.591215	-0.429035	-0.794316	-0.357967	-0.266138	-0.351014	4.87592	0.548356	1.86196	1.67503	1.69187	1.56919	0.34937	-0.151036	-0.110951	0.147677	1.53992	0.147677	1.53992	2.37426	0.417106	1.999	4.40491	2.10717	1.44408	0.568188
260	-0.818151	1.98067	1.8578	-0.557396	-0.43152	-0.818151	-0.357563	-0.858012	-0.225572	-0.351161	4.93204	0.55932	1.88437	1.75507	1.77668	1.51132	5.94961	-0.110951	0.16289	1.48593	-0.818151	1.98067	1.80007	-0.557396	-0.43152	-0.818151	-0.357563	-0.225572	-0.351161	4.93204	0.55932	1.88437	1.75507	1.59177	1.63545	0.399715	-0.147335	-0.179086	0.16289	1.48593	0.16289	1.48593	2.34383	0.417417	1.8999	4.56783	1.99503	1.50552	0.568862
261	-0.762405	1.96178	1.80007	-0.600422	-0.414305	-0.762405	-0.382038	-0.90124	-0.249542	-0.360747	4.9081	0.534702	1.81387	1.66583	1.56919	1.49295	5.85845	-0.179086	0.147237	1.46449	-0.762405	1.96178	1.78491	-0.600422	-0.414305	-0.762405	-0.382038	-0.249542	-0.360747	4.9081	0.534702	1.81387	1.66583	1.52954	1.68296	0.356778	-0.131477	-0.188654	0.147237	1.46449	0.147237	1.46449	2.31611	0.408838	2.0946	4.36162	2.02286	1.53186	0.560388
262	-0.809741	2.04261	1.78491	-0.617775	-0.428097	-0.809741	-0.335622	-0.889148	-0.146633	-0.370801	4.86316	0.561118	1.80601	1.66855	1.63545	1.57538	5.79025	-0.188654	0.131224	1.49084	-0.809741	2.04261	1.89989	-0.617775	-0.428097	-0.809741	-0.335622	-0.146633	-0.370801	4.86316	0.561118	1.80601	1.66855	1.69278	1.69187	0.37769	-0.119548	-0.163718	0.131224	1.49084	0.131224	1.49084	2.32439	0.414524	1.97516	4.66899	2.04513	1.50503	0.56821
263	-0.811866	1.96495	1.89989	-0.6259	-0.442134	-0.811866	-0.361784	-0.885406	-0.219763	-0.361458	4.92332	0.551263	1.85682	1.7603	1.68296	1.54622	5.96197	-0.163718	0.157085	1.47397	-0.811866	1.96495	1.82157	-0.6259	-0.442134	-0.811866	-0.361784	-0.219763	-0.361458	4.92332	0.551263	1.85682	1.7603	1.67792	1.59177	0.348535	-0.136192	-0.208093	0.157085	1.47397	0.157085	1.47397	2.3209	0.410823	1.99149	4.50378	2.17932	1.51633	0.561913
264	-0.791419	1.96664	1.82157	-0.633445	-0.432223	-0.791419	-0.369325	-0.868552	-0.278446	-0.352445	4.90166	0.558613	1.82119	1.69618	1.69187	1.5392	5.87565	-0.208093	0.148364	1.46542	-0.791419	1.96664	1.88343	-0.633445	-0.432223	-0.791419	-0.369325	-0.278446	-0.352445	4.90166	0.558613	1.82119	1.69618	1.7295	1.52954	0.353254	-0.146222	-0.228981	0.148364	1.46542	0.148364	1.46542	2.29467	0.406761	1.97153	4.33056	2.00421	1.49548	0.556819
265	-0.827142	1.97698	1.88343	-0.599454	-0.414997	-0.827142	-0.308084	-0.886532	-0.226499	-0.328812	4.92298	0.545535	1.85701	1.69741	1.59177	1.48557	5.79593	-0.228981	0.167898	1.47441	-0.827142	1.97698	1.95618	-0.599454	-0.414997	-0.827142	-0.308084	-0.226499	-0.328812	4.92298	0.545535	1.85701	1.69741	1.67414	1.69278	0.37455	-0.0975841	-0.222721	0.167898	1.47441	0.167898	1.47441	2.31316	0.413363	1.90541	4.41926	1.99777	1.45545	0.56182
266	-0.79713	1.99469	1.95618	-0.625911	-0.410444	-0.79713	-0.351398	-0.87657	-0.160986	-0.34673	4.94788	0.557859	1.81102	1.70195	1.52954	1.52834	6.02523	-0.222721	0.177179	1.50348	-0.79713	1.99469	1.83137	-0.625911	-0.410444	-0.79713	-0.351398	-0.160986	-0.34673	4.94788	0.557859	1.81102	1.70195	1.71134	1.67792	0.384437	-0.135104	-0.255937	0.177179	1.50348	0.177179	1.50348	2.26867	0.419233	1.87544	4.4972	2.04361	1.46645	0.568918
267	-0.828902	2.05896	1.83137	-0.544673	-0.4249	-0.828902	-0.296188	-0.887854	-0.267722	-0.325218	4.93963	0.54973	1.85491	1.73082	1.69278	1.54026	5.93261	-0.255937	0.149144	1.52612	-0.828902	2.05896	1.87562	-0.544673	-0.4249	-0.828902	-0.296188	-0.267722	-0.325218	4.93963	0.54973	1.85491	1.73082	1.68271	1.7295	0.368653	-0.150021	-0.278029	0.149144	1.52612	0.149144	1.52612	2.32997	0.41681	1.96979	4.42639	2.085	1.4754	0.567839
268	-0.802129	1.86368	1.87562	-0.632387	-0.406422	-0.802129	-0.321646	-0.891548	-0.257675	-0.323094	5.03433	0.526303	1.78717	1.71366	1.67792	1.51098	5.93069	-0.278029	0.17143	1.50047	-0.802129	1.86368	1.92101	-0.632387	-0.406422	-0.802129	-0.321646	-0.257675	-0.323094	5.03433	0.526303	1.78717	1.71366	1.68736	1.67414	0.396177	-0.102435	-0.270869	0.17143	1.50047	0.17143	1.50047	2.25654	0.413564	1.92322	4.28659	2.06118	1.47489	0.563885
269	-0.828619	2.03563	1.92101	-0.547815	-0.391862	-0.828619	-0.321108	-0.871457	-0.230693	-0.332725	4.94062	0.533262	1.87718	1.72178	1.7295	1.46498	5.8818	-0.270869	0.160479	1.46778	-0.828619	2.03563	1.91269	-0.547815	-0.391862	-0.828619	-0.321108	-0.230693	-0.332725	4.94062	0.533262	1.87718	1.72178	1.70161	1.71134	0.36963	-0.118843	-0.329896	0.160479	1.46778	0.160479	1.46778	2.29754	0.416277	1.90195	4.33368	2.01547	1.49844	0.562544
270	-0.778684	1.99771	1.91269	-0.583124	-0.441034	-0.778684	-0.383776	-0.881884	-0.235014	-0.349549	4.9503	0.576664	1.903	1.75211	1.67414	1.55726	5.76529	-0.329896	0.140339	1.43776	-0.778684	1.99771	1.8829	-0.583124	-0.441034	-0.778684	-0.383776	-0.235014	-0.349549	4.9503	0.576664	1.903	1.75211	1.7961	1.68271	0.400176	-0.154025	-0.317318	0.140339	1.43776	0.140339	1.43776	2.27699	0.411028	1.91872	4.31057	2.00486	1.42829	0.559649
271	-0.801547	2.08411	1.8829	-0.616023	-0.406555	-0.801547	-0.304319	-0.893227	-0.314921	-0.325352	5.00244	0.557807	1.87025	1.77099	1.71134	1.45481	5.76204	-0.317318	0.105179	1.46161	-0.801547	2.08411	1.82717	-0.616023	-0.406555	-0.801547	-0.304319	-0.314921	-0.325352	5.00244	0.557807	1.87025	1.77099	1.68803	1.68736	0.365971	-0.133396	-0.266601	0.105179	1.46161	0.105179	1.46161	2.25945	0.409946	2.00485	4.6188	2.07769	1.44158	0.562275
272	-0.808737	1.9692	1.82717	-0.618776	-0.429424	-0.808737	-0.366397	-0.90583	-0.224011	-0.370896	4.8199	0.532317	1.86579	1.73958	1.68271	1.50899	5.86981	-0.266601	0.124648	1.46946	-0.808737	1.9692	1.87227	-0.618776	-0.429424	-0.808737	-0.366397	-0.224011	-0.370896	4.8199	0.532317	1.86579	1.73958	1.63108	1.70161	0.361323	-0.124888	-0.343458	0.124648	1.46946	0.124648	1.46946	2.25959	0.406498	1.94346	4.47674	2.07809	1.47119	0.558372
273	-0.798666	1.9738	1.87227	-0.600854	-0.453706	-0.798666	-0.37248	-0.873396	-0.191865	-0.365524	4.84485	0.532822	1.84812	1.71683	1.68736	1.54217	5.81074	-0.343458	0.183764	1.47567	-0.798666	1.9738	1.929	-0.600854	-0.453706	-0.798666	-0.37248	-0.191865	-0.365524	4.84485	0.532822	1.84812	1.71683	1.80362	1.7961	0.368766	-0.14449	-0.365138	0.183764	1.47567	0.183764	1.47567	2.24276	0.408547	1.86078	4.47517	2.06816	1.51896	0.559849
274	-0.814457	1.99959	1.929	-0.611676	-0.42157	-0.814457	-0.355081	-0.897165	-0.256389	-0.339682	4.99495	0.533922	1.84821	1.74917	1.70161	1.41267	5.85343	-0.365138	0.17453	1.5154	-0.814457	1.99959	1.90403	-0.611676	-0.42157	-0.814457	-0.355081	-0.256389	-0.339682	4.99495	0.533922	1.84821	1.74917	1.67265	1.68803	0.383256	-0.0876845	-0.359535	0.17453	1.5154	0.17453	1.5154	2.23777	0.417596	2.09015	4.64994	2.16437	1.46933	0.569767
275	-0.808097	1.94025	1.90403	-0.601446	-0.393626	-0.808097	-0.386239	-0.876864	-0.241306	-0.335768	4.87744	0.505246	1.84018	1.74519	1.7961	1.56142	5.88466	-0.359535	0.180829	1.48985	-0.808097	1.94025	1.94876	-0.601446	-0.393626	-0.808097	-0.386239	-0.241306	-0.335768	4.87744	0.505246	1.84018	1.74519	1.66387	1.63108	0.354502	-0.108214	-0.374735	0.180829	1.48985	0.180829	1.48985	2.27943	0.412001	1.66742	4.53519	2.07805	1.49334	0.56067
276	-0.806304	1.97217	1.94876	-0.619801	-0.445663	-0.806304	-0.36796	-0.904199	-0.276936	-0.34828	4.87588	0.517853	1.84537	1.72077	1.68803	1.54521	5.77665	-0.374735	0.146943	1.50047	-0.806304	1.97217	1.90274	-0.619801	-0.445663	-0.806304	-0.36796	-0.276936	-0.34828	4.87588	0.517853	1.84537	1.72077	1.8928	1.80362	0.38276	-0.104841	-0.390323	0.146943	1.50047	0.146943	1.50047	2.26698	0.412242	1.98621	4.58036	2.10931	1.45112	0.562695
277	-0.800169	1.91472	1.90274	-0.579279	-0.453147	-0.800169	-0.354087	-0.873215	-0.223208	-0.359745	4.88821	0.519674	1.86225	1.75052	1.63108	1.51685	5.60281	-0.390323	0.137707	1.45792	-0.800169	1.91472	1.83248	-0.579279	-0.453147	-0.800169	-0.354087	-0.223208	-0.359745	4.88821	0.519674	1.86225	1.75052	1.8928	1.67265	0.386051	-0.109576	-0.42671	0.137707	1.45792	0.137707	1.45792	2.27973	0.407101	1.87933	4.49436	2.11084	1.4673	0.559189
278	-0.791992	1.90641	1.83248	-0.599488	-0.484752	-0.791992	-0.400949	-0.921194	-0.303701	-0.376786	4.89236	0.487178	1.80396	1.71482	1.80362	1.51669	5.65681	-0.42671	0.148851	1.46351	-0.791992	1.90641	1.91914	-0.599488	-0.484752	-0.791992	-0.400949	-0.303701	-0.376786	4.89236	0.487178	1.80396	1.71482	1.8928	1.66387	0.39597	-0.0989708	-0.453863	0.148851	1.46351	0.148851	1.46351	2.28458	0.400616	1.92086	4.52697	2.13863	1.50623	0.551629
279	-0.795653	1.91374	1.91914	-0.603779	-0.460944	-0.795653	-0.410466	-0.891474	-0.305327	-0.371628	4.85456	0.502575	1.85102	1.68554	1.67265	1.52657	5.66908	-0.453863	0.155848	1.45607	-0.795653	1.91374	1.96181	-0.603779	-0.460944	-0.795653	-0.410466	-0.305327	-0.371628	4.85456	0.502575	1.85102	1.68554	1.8928	1.8928	0.36889	-0.081541	-0.433273	0.155848	1.45607	0.155848	1.45607	2.27343	0.403093	2.02845	4.43726	2.14743	1.46619	0.553842
280	-0.790008	2.09291	1.96181	-0.665876	-0.407399	-0.790008	-0.419362	-0.898694	-0.296206	-0.348985	4.94118	0.536252	1.86437	1.76499	1.66387	1.54113	5.79808	-0.433273	0.143274	1.512	-0.790008	2.09291	1.92127	-0.665876	-0.407399	-0.790008	-0.419362	-0.296206	-0.348985	4.94118	0.536252	1.86437	1.76499	1.8928	1.8928	0.381509	-0.0916881	-0.467723	0.143274	1.512	0.143274	1.512	2.16957	0.407435	1.87672	4.35348	2.12123	1.51374	0.556893
281	-0.792266	2.09142	1.92127	-0.59909	-0.422263	-0.792266	-0.385328	-0.909307	-0.155331	-0.370691	4.88085	0.529047	1.84086	1.79823	1.8928	1.47707	5.68705	-0.467723	0.192485	1.49894	-0.792266	2.09142	1.95894	-0.59909	-0.422263	-0.792266	-0.385328	-0.155331	-0.370691	4.88085	0.529047	1.84086	1.79823	1.8928	1.8928	0.366042	-0.0986293	-0.456515	0.192485	1.49894	0.192485	1.49894	2.2305	0.421681	1.83674	4.5996	2.09778	1.49441	0.573837
282	-0.802834	2.05301	1.95894	-0.638122	-0.419816	-0.802834	-0.290643	-0.898791	-0.276389	-0.299884	4.93618	0.530452	1.8352	1.7365	1.8928	1.5065	5.58974	-0.456515	0.177391	1.47558	-0.802834	2.05301	1.92155	-0.638122	-0.419816	-0.802834	-0.290643	-0.276389	-0.299884	4.93618	0.530452	1.8352	1.7365	1.8928	1.8928	0.366942	-0.0880811	-0.492222	0.177391	1.47558	0.177391	1.47558	2.2049	0.415281	1.87637	4.38434	2.15286	1.47348	0.563518
283	-0.827166	2.13415	1.92155	-0.616	-0.442609	-0.827166	-0.371642	-0.869904	-0.362674	-0.3639	4.899	0.546562	1.84905	1.76665	1.8928	1.523	5.7261	-0.492222	0.205425	1.48961	-0.827166	2.13415	1.9033	-0.616	-0.442609	-0.827166	-0.371642	-0.362674	-0.3639	4.899	0.546562	1.84905	1.76665	1.8928	1.8928	0.37298	-0.0953817	-0.502147	0.205425	1.48961	0.205425	1.48961	2.24822	0.41272	1.83544	4.21087	2.16598	1.5068	0.559002
284	-0.821156	1.96399	1.9033	-0.576752	-0.41863	-0.821156	-0.43102	-0.897033	-0.30621	-0.377059	4.8503	0.505147	1.89846	1.76341	1.8928	1.54066	5.70209	-0.502147	0.145282	1.52439	-0.821156	1.96399	1.99246	-0.576752	-0.41863	-0.821156	-0.43102	-0.30621	-0.377059	4.8503	0.505147	1.89846	1.76341	1.8928	1.8928	0.370097	-0.0820361	-0.49627	0.145282	1.52439	0.145282	1.52439	2.22147	0.409863	1.73817	4.23888	2.11986	1.46467	0.555967
285	-0.835601	1.99496	1.99246	-0.581145	-0.438663	-0.835601	-0.456045	-0.875571	-0.24112	-0.371505	4.89563	0.554344	1.86882	1.77656	1.8928	1.548	5.84916	-0.49627	0.193403	1.47988	-0.835601	1.99496	1.92507	-0.581145	-0.438663	-0.835601	-0.456045	-0.24112	-0.371505	4.89563	0.554344	1.86882	1.77656	1.8928	1.8928	0.373768	-0.0818258	-0.49627	0.193403	1.47988	0.193403	1.47988	2.27482	0.416221	1.9316	4.57505	2.15623	1.4699	0.567415
286	-0.822335	2.05146	1.92507	-0.597691	-0.4752	-0.822335	-0.379224	-0.88087	-0.25387	-0.345792	4.88421	0.531682	1.92445	1.75975	1.8928	1.51534	5.70094	-0.49627	0.180345	1.47783	-0.822335	2.05146	1.94961	-0.597691	-0.4752	-0.822335	-0.379224	-0.25387	-0.345792	4.88421	0.531682	1.92445	1.75975	1.8928	1.8928	0.322074	-0.0900792	-0.49627	0.180345	1.47783	0.180345	1.47783	2.24012	0.416728	1.8647	4.32179	2.04214	1.47364	0.564172
287	-0.827897	2.0267	1.94961	-0.571438	-0.450169	-0.827897	-0.434331	-0.895907	-0.266613	-0.373259	4.87456	0.509487	1.85596	1.76084	1.8928	1.56663	5.74925	-0.49627	0.189541	1.52333	-0.827897	2.0267	1.86962	-0.571438	-0.450169	-0.827897	-0.434331	-0.266613	-0.373259	4.87456	0.509487	1.85596	1.76084	1.8928	1.8928	0.377802	-0.0770184	-0.49627	0.189541	1.52333	0.189541	1.52333	2.24258	0.416521	1.69834	4.47178	2.0584	1.47403	0.559553
288	-0.776816	2.02009	1.86962	-0.606031	-0.431985	-0.776816	-0.409524	-0.889295	-0.270179	-0.357523	4.87897	0.520372	1.8558	1.75973	1.8928	1.55714	5.70601	-0.49627	0.201188	1.50337	-0.776816	2.02009	1.84776	-0.606031	-0.431985	-0.776816	-0.409524	-0.270179	-0.357523	4.87897	0.520372	1.8558	1.75973	1.8928	1.8928	0.40586	-0.0488108	-0.49627	0.201188	1.50337	0.201188	1.50337	2.23253	0.410026	1.92391	4.43784	2.1692	1.43778	0.555952
289	-0.808778	2.06173	1.84776	-0.612279	-0.440769	-0.808778	-0.447438	-0.916933	-0.309583	-0.396647	4.85847	0.500896	1.84769	1.78689	1.8928	1.52238	5.80076	-0.49627	0.193944	1.49568	-0.808778	2.06173	1.96934	-0.612279	-0.440769	-0.808778	-0.447438	-0.309583	-0.396647	4.85847	0.500896	1.84769	1.78689	1.8928	1.8928	0.391148	-0.0542296	-0.49627	0.193944	1.49568	0.193944	1.49568	2.2176	0.411416	1.69471	4.18079	2.13011	1.46014	0.557789
290	-0.825124	2.11764	1.96934	-0.631453	-0.429149	-0.825124	-0.314705	-0.898625	-0.39562	-0.334934	4.91713	0.523295	1.89507	1.75326	1.8928	1.55934	5.61841	-0.49627	0.193753	1.49222	-0.825124	2.11764	1.9191	-0.631453	-0.429149	-0.825124	-0.314705	-0.39562	-0.334934	4.91713	0.523295	1.89507	1.75326	1.8928	1.8928	0.380739	-0.0641292	-0.49627	0.193753	1.49222	0.193753	1.49222	2.23061	0.408805	1.85242	4.54544	2.20902	1.46076	0.558392
291	-0.793794	1.99609	1.9191	-0.573111	-0.404468	-0.793794	-0.414439	-0.920351	-0.32764	-0.361341	4.93367	0.502763	1.90357	1.78476	1.8928	1.5644	5.59361	-0.49627	0.195099	1.50082	-0.793794	1.99609	1.93736	-0.573111	-0.404468	-0.793794	-0.414439	-0.32764	-0.361341	4.93367	0.502763	1.90357	1.78476	1.8928	1.8928	0.387435	-0.051304	-0.49627	0.195099	1.50082	0.195099	1.50082	2.20192	0.413783	2.08268	4.36176	2.12489	1.45447	0.563172
292	-0.81488	1.97767	1.93736	-0.607647	-0.453839	-0.81488	-0.388948	-0.884318	-0.338787	-0.373868	4.84248	0.512207	1.79938	1.71198	1.8928	1.56235	5.61648	-0.49627	0.200473	1.50715	-0.81488	1.97767	1.95291	-0.607647	-0.453839	-0.81488	-0.388948	-0.338787	-0.373868	4.84248	0.512207	1.79938	1.71198	1.8928	1.8928	0.407403	-0.0546143	-0.49627	0.200473	1.50715	0.200473	1.50715	2.21428	0.404648	1.94681	4.61512	2.14219	1.45673	0.555302
293	-0.813851	1.89279	1.95291	-0.662827	-0.476053	-0.813851	-0.410135	-0.896974	-0.306868	-0.368564	4.86719	0.494103	1.8063	1.74181	1.8928	1.57713	5.64803	-0.49627	0.187901	1.5297	-0.813851	1.89279	2.01885	-0.662827	-0.476053	-0.813851	-0.410135	-0.306868	-0.368564	4.86719	0.494103	1.8063	1.74181	1.8928	1.8928	0.368715	-0.0533826	-0.49627	0.187901	1.5297	0.187901	1.5297	2.18034	0.404393	1.65897	4.41593	2.06533	1.44815	0.547423
294	-0.786588	1.83211	2.01885	-0.623522	-0.474157	-0.786588	-0.370401	-0.9003	-0.313839	-0.345041	4.95861	0.48464	1.80574	1.78458	1.8928	1.57158	5.68701	-0.49627	0.212423	1.44064	-0.786588	1.83211	2.01885	-0.623522	-0.474157	-0.786588	-0.370401	-0.313839	-0.345041	4.95861	0.48464	1.80574	1.78458	1.8928	1.8928	0.391219	-0.0320371	-0.49627	0.212423	1.44064	0.212423	1.44064	2.18034	0.412801	1.71742	4.51998	2.15765	1.4348	0.561596
295	-0.789883	1.96089	2.01885	-0.572474	-0.405664	-0.789883	-0.4388	-0.896367	-0.316616	-0.366367	4.92796	0.511283	1.87323	1.77686	1.8928	1.54291	5.73988	-0.49627	0.199264	1.50091	-0.789883	1.96089	2.01885	-0.572474	-0.405664	-0.789883	-0.4388	-0.316616	-0.366367	4.92796	0.511283	1.87323	1.77686	1.8928	1.8928	0.377126	-0.0430253	-0.49627	0.199264	1.50091	0.199264	1.50091	2.18034	0.413186	1.79493	4.53104	2.13767	1.42986	0.560018
296	-0.839112	1.98221	2.01885	-0.591147	-0.451108	-0.839112	-0.408852	-0.880277	-0.362457	-0.384021	4.82092	0.504919	1.88254	1.76478	1.8928	1.62189	5.76049	-0.49627	0.174181	1.49061	-0.839112	1.98221	2.01885	-0.591147	-0.451108	-0.839112	-0.408852	-0.362457	-0.384021	4.82092	0.504919	1.88254	1.76478	1.8928	1.8928	0.368792	-0.0276875	-0.49627	0.174181	1.49061	0.174181	1.49061	2.18034	0.413204	1.71274	4.32868	2.11294	1.38033	0.55964
297	-0.801896	1.97617	2.01885	-0.596564	-0.4516	-0.801896	-0.456696	-0.894702	-0.318663	-0.358629	4.86312	0.485743	1.87835	1.78857	1.8928	1.59517	5.52505	-0.49627	0.226693	1.51425	-0.801896	1.97617	2.01885	-0.596564	-0.4516	-0.801896	-0.456696	-0.318663	-0.358629	4.86312	0.485743	1.87835	1.78857	1.8928	1.8928	0.359832	-0.0423692	-0.49627	0.226693	1.51425	0.226693	1.51425	2.18034	0.40888	1.57871	4.43852	2.10862	1.42958	0.55573
298	-0.798575	1.89439	2.01885	-0.670735	-0.437041	-0.798575	-0.395311	-0.890969	-0.330559	-0.377718	4.85737	0.489145	1.88255	1.8135	1.8928	1.61584	5.56365	-0.49627	0.187405	1.52267	-0.798575	1.89439	2.01885	-0.670735	-0.437041	-0.798575	-0.395311	-0.330559	-0.377718	4.85737	0.489145	1.88255	1.8135	1.8928	1.8928	0.408908	-0.0310649	-0.49627	0.187405	1.52267	0.187405	1.52267	2.18034	0.400597	1.88534	4.48578	2.1679	1.40488	0.548329
299	-0.798575	1.89439	2.01885	-0.670735	-0.437041	-0.798575	-0.395311	-0.890969	-0.330559	-0.377718	4.85737	0.489145	1.88255	1.8135	1.8928	1.61584	5.56365	-0.49627	0.187405	1.52267	-0.798575	1.89439	2.01885	-0.670735	-0.437041	-0.798575	-0.395311	-0.330559	-0.377718	4.85737	0.489145	1.88255	1.8135	1.8928	1.8928	0.408908	-0.0310649	-0.49627	0.187405	1.52267	0.187405	1.52267	2.18034	0.400597	1.88534	4.48578	2.1679	1.40488	0.548329
300	-0.798575	1.89439	2.01885	-0.670735	-0.437041	-0.798575	-0.395311	-0.890969	-0.330559	-0.377718	4.85737	0.489145	1.88255	1.8135	1.8928	1.61584	5.56365	-0.49627	0.187405	1.52267	-0.798575	1.89439	2.01885	-0.670735	-0.437041	-0.798575	-0.395311	-0.330559	-0.377718	4.85737	0.489145	1.88255	1.8135	1.8928	1.8928	0.408908	-0.0310649	-0.49627	0.187405	1.52267	0.187405	1.52267	2.18034	0.400597	1.88534	4.48578	2.1679	1.40488	0.548329
[truncated: 170 more columns]

## Sheet: Panel C
Genotype	Condition	Peak
WT	Baseline	0.0727741
WT	Baseline	0.183372
WT	Baseline	0.105407
WT	Baseline	0.118442
WT	Baseline	0.126108
WT	Baseline	0.0727741
WT	Baseline	0.134586
WT	Baseline	0.0614712
WT	Baseline	0.135968
WT	Baseline	0.0535008
WT	Baseline	0.111483
WT	Baseline	0.0382613
WT	Baseline	0.0850016
WT	Baseline	0.0486427
WT	Baseline	0.314029
WT	Baseline	0.206343
WT	Baseline	0.128993
WT	Baseline	0.0857413
WT	Baseline	0.0782067
WT	Baseline	0.088027
WT	Baseline	0.0727741
WT	Baseline	0.183372
WT	Baseline	0.310237
WT	Baseline	0.118442
WT	Baseline	0.126108
WT	Baseline	0.0727741
WT	Baseline	0.134586
WT	Baseline	0.135968
WT	Baseline	0.0535008
WT	Baseline	0.111483
WT	Baseline	0.0382613
WT	Baseline	0.0850016
WT	Baseline	0.0486427
WT	Baseline	0.64382
WT	Baseline	0.423287
WT	Baseline	0.0420814
WT	Baseline	0.0940226
WT	Baseline	0.0857413
WT	Baseline	0.0782067
WT	Baseline	0.088027
WT	Baseline	0.0782067
WT	Baseline	0.088027
WT	Baseline	0.386336
WT	Baseline	0.0390996
WT	Baseline	0.102283
WT	Baseline	0.0858462
WT	Baseline	0.0694973
WT	Baseline	0.0653445
WT	Baseline	0.0366112
WT	Baseline	0.0907223
WT	Baseline	0.115862
WT	Baseline	0.19585
WT	Baseline	0.117394
WT	Baseline	0.140616
WT	Baseline	0.0725414
WT	Baseline	1.43811
WT	Baseline	1.43811
WT	Baseline	0.118944
WT	Baseline	0.0874408
WT	Baseline	0.0438002
WT	Baseline	0.128993
WT	Baseline	0.197915
WT	Baseline	1.43811
WT	Baseline	0.0573336
WT	Baseline	0.131594
WT	Baseline	0.0944277
WT	Baseline	0.0944277
WT	Baseline	1.43811
WT	Baseline	0.0483948
WT	Baseline	1.43811
WT	Baseline	0.118944
WT	Baseline	0.115862
WT	Baseline	0.19585
WT	Baseline	0.117394
WT	Baseline	0.140616
WT	Baseline	0.0725414
WT	Baseline	1.43811
WT	Baseline	1.43811
WT	Baseline	0.118944
WT	Baseline	0.0874408
WT	Baseline	0.0438002
WT	Baseline	0.128993
WT	Baseline	0.197915
WT	Baseline	0.0573336
WT	Baseline	0.131594
WT	Baseline	0.0944277
WT	Baseline	0.0944277
WT	Baseline	0.175108
WT	Baseline	0.175108
WT	CCh	2.16685
WT	CCh	2.41665
WT	CCh	3.63519
WT	CCh	2.01891
WT	CCh	2.01283
WT	CCh	2.16685
WT	CCh	3.49032
WT	CCh	0.48576
WT	CCh	2.79107
WT	CCh	1.56629
WT	CCh	5.62385
WT	CCh	1.44726
WT	CCh	2.55348
WT	CCh	2.63334
WT	CCh	3.26891
WT	CCh	1.90042
WT	CCh	8.90497
WT	CCh	6.14461
WT	CCh	1.54506
WT	CCh	2.36519
WT	CCh	2.16685
WT	CCh	2.41665
WT	CCh	3.63519
WT	CCh	2.01891
WT	CCh	2.01283
WT	CCh	2.16685
WT	CCh	3.49032
WT	CCh	2.79107
WT	CCh	1.56629
WT	CCh	5.62385
WT	CCh	1.44726
WT	CCh	2.55348
WT	CCh	2.63334
WT	CCh	3.26891
WT	CCh	3.26891
WT	CCh	1.28021
WT	CCh	0.741183
WT	CCh	6.14461
WT	CCh	1.54506
WT	CCh	2.36519
WT	CCh	1.54506
WT	CCh	2.36519
WT	CCh	2.92094
WT	CCh	1.11232
WT	CCh	5.77685
WT	CCh	4.99167
WT	CCh	2.62509
WT	CCh	2.02418
WT	CCh	1.24317
WT	CCh	0.835677
WT	CCh	3.8902
WT	CCh	2.63281
WT	CCh	2.668
WT	CCh	2.1326
WT	CCh	2.15196
WT	CCh	3.99567
WT	CCh	3.99567
WT	CCh	1.90233
WT	CCh	2.59982
WT	CCh	1.82587
WT	CCh	8.90497
WT	CCh	2.16499
WT	CCh	3.99567
WT	CCh	2.17123
WT	CCh	2.47639
WT	CCh	2.42822
WT	CCh	2.42822
WT	CCh	3.99567
WT	CCh	1.13257
WT	CCh	3.99567
WT	CCh	1.90233
WT	CCh	3.8902
WT	CCh	2.63281
WT	CCh	2.668
WT	CCh	2.1326
WT	CCh	2.15196
WT	CCh	3.99567
WT	CCh	3.99567
WT	CCh	1.90233
WT	CCh	2.59982
WT	CCh	1.82587
WT	CCh	8.90497
WT	CCh	2.16499
WT	CCh	2.17123
WT	CCh	2.47639
WT	CCh	2.42822
WT	CCh	2.42822
WT	CCh	2.49493
WT	CCh	2.49493
itprRNAi	Baseline	0.139725
itprRNAi	Baseline	0.0507642
itprRNAi	Baseline	0.0727845
itprRNAi	Baseline	0.429836
itprRNAi	Baseline	0.410519
itprRNAi	Baseline	0.164412
itprRNAi	Baseline	0.11681
itprRNAi	Baseline	0.305003
itprRNAi	Baseline	0.149146
itprRNAi	Baseline	0.292682
itprRNAi	Baseline	0.305003
itprRNAi	Baseline	0.176177
itprRNAi	Baseline	0.118523
itprRNAi	Baseline	0.104997
itprRNAi	Baseline	0.0771784
itprRNAi	Baseline	0.0732828
itprRNAi	Baseline	0.122313
itprRNAi	Baseline	0.0351594
itprRNAi	Baseline	0.215861
itprRNAi	Baseline	0.133923
itprRNAi	Baseline	0.140638
itprRNAi	Baseline	0.122938
itprRNAi	Baseline	0.283941
itprRNAi	Baseline	0.321333
itprRNAi	Baseline	0.243002
itprRNAi	Baseline	0.171188
itprRNAi	Baseline	0.104243
itprRNAi	Baseline	0.130724
itprRNAi	Baseline	0.14154
itprRNAi	Baseline	0.156782
itprRNAi	Baseline	0.140953
itprRNAi	Baseline	0.156467
itprRNAi	Baseline	0.127416
itprRNAi	Baseline	0.149094
itprRNAi	Baseline	0.117092
itprRNAi	Baseline	0.03708
itprRNAi	Baseline	0.0938036
itprRNAi	Baseline	0.130798
itprRNAi	Baseline	0.0419266
itprRNAi	Baseline	0.0849592
itprRNAi	Baseline	0.0700126
itprRNAi	Baseline	0.0956696
itprRNAi	Baseline	0.0869548
itprRNAi	Baseline	0.10573
itprRNAi	Baseline	0.0903789
itprRNAi	Baseline	0.045351
itprRNAi	Baseline	0.205417
itprRNAi	Baseline	0.0646054
itprRNAi	Baseline	0.0750846
itprRNAi	Baseline	0.0628571
itprRNAi	Baseline	0.170625
itprRNAi	Baseline	0.0317285
itprRNAi	Baseline	0.0536501
itprRNAi	Baseline	0.0627705
itprRNAi	Baseline	0.254506
itprRNAi	Baseline	0.0475127
itprRNAi	Baseline	0.0604493
itprRNAi	Baseline	0.0432194
itprRNAi	Baseline	0.196561
itprRNAi	Baseline	0.0789447
itprRNAi	Baseline	0.085156
itprRNAi	Baseline	0.0416166
itprRNAi	Baseline	0.0704484
itprRNAi	Baseline	0.10398
itprRNAi	Baseline	0.0835122
itprRNAi	Baseline	0.0761761
itprRNAi	Baseline	0.135887
itprRNAi	Baseline	0.100086
itprRNAi	Baseline	0.0653445
itprRNAi	Baseline	0.102377
itprRNAi	Baseline	0.119656
itprRNAi	Baseline	0.0985563
itprRNAi	Baseline	0.100086
itprRNAi	Baseline	0.102377
itprRNAi	Baseline	0.0153297
itprRNAi	Baseline	0.0183193
itprRNAi	Baseline	0.0646146
itprRNAi	CCh	0.12655
itprRNAi	CCh	0.076236
itprRNAi	CCh	0.0540245
itprRNAi	CCh	0.213222
itprRNAi	CCh	0.572755
itprRNAi	CCh	0.15139
itprRNAi	CCh	0.272957
itprRNAi	CCh	0.430972
itprRNAi	CCh	0.15773
itprRNAi	CCh	0.20495
itprRNAi	CCh	0.430972
itprRNAi	CCh	0.162403
itprRNAi	CCh	0.00439637
itprRNAi	CCh	0.170467
itprRNAi	CCh	0.113426
itprRNAi	CCh	0.0465853
itprRNAi	CCh	0.153971
itprRNAi	CCh	0.0510987
itprRNAi	CCh	0.221262
itprRNAi	CCh	0.176274
itprRNAi	CCh	0.209876
itprRNAi	CCh	0.230514
itprRNAi	CCh	0.268802
itprRNAi	CCh	0.359966
itprRNAi	CCh	0.222052
itprRNAi	CCh	0.0794855
itprRNAi	CCh	0.174999
itprRNAi	CCh	0.115784
itprRNAi	CCh	0.0588942
itprRNAi	CCh	0.180947
itprRNAi	CCh	0.119057
itprRNAi	CCh	0.141506
itprRNAi	CCh	0.225868
itprRNAi	CCh	0.437544
itprRNAi	CCh	0.15711
itprRNAi	CCh	0.101369
itprRNAi	CCh	0.149458
itprRNAi	CCh	0.20673
itprRNAi	CCh	0.369632
itprRNAi	CCh	0.631203
itprRNAi	CCh	0.0279814
itprRNAi	CCh	0.610367
itprRNAi	CCh	0.395654
itprRNAi	CCh	0.362264
itprRNAi	CCh	0.00987024
itprRNAi	CCh	0.166432
itprRNAi	CCh	2.51462
itprRNAi	CCh	0.28043
itprRNAi	CCh	2.3178
itprRNAi	CCh	0.0290459
itprRNAi	CCh	0.791872
itprRNAi	CCh	0.0781896
itprRNAi	CCh	0.773363
itprRNAi	CCh	0.518116
itprRNAi	CCh	0.201671
itprRNAi	CCh	0.163437
itprRNAi	CCh	0.0492085
itprRNAi	CCh	0.218709
itprRNAi	CCh	0.828448
itprRNAi	CCh	0.0485619
itprRNAi	CCh	0.0540051
itprRNAi	CCh	0.183623
itprRNAi	CCh	0.0317633
itprRNAi	CCh	0.119069
itprRNAi	CCh	0.120489
itprRNAi	CCh	0.0531772
itprRNAi	CCh	0.0500051
itprRNAi	CCh	0.098197
itprRNAi	CCh	2.02418
itprRNAi	CCh	2.03472
itprRNAi	CCh	1.03035
itprRNAi	CCh	0.111263
itprRNAi	CCh	0.098197
itprRNAi	CCh	2.03472
itprRNAi	CCh	0.417241
itprRNAi	CCh	0.150539
itprRNAi	CCh	0.138332
itprRNAilSet2OE	Baseline	0.0309
itprRNAilSet2OE	Baseline	0.125876
itprRNAilSet2OE	Baseline	0.0638693
itprRNAilSet2OE	Baseline	0.0309
itprRNAilSet2OE	Baseline	0.125876
itprRNAilSet2OE	Baseline	0.0638693
itprRNAilSet2OE	Baseline	0.0661394
itprRNAilSet2OE	Baseline	0.33981
itprRNAilSet2OE	Baseline	0.33981
itprRNAilSet2OE	Baseline	0.352124
itprRNAilSet2OE	Baseline	0.109477
itprRNAilSet2OE	Baseline	0.0744468
itprRNAilSet2OE	Baseline	0.115489
itprRNAilSet2OE	Baseline	0.067269
itprRNAilSet2OE	Baseline	0.0801753
itprRNAilSet2OE	Baseline	0.0400373
itprRNAilSet2OE	Baseline	0.386336
itprRNAilSet2OE	Baseline	0.0390996
itprRNAilSet2OE	Baseline	0.102283
itprRNAilSet2OE	Baseline	0.0694973
itprRNAilSet2OE	Baseline	0.0653445
itprRNAilSet2OE	Baseline	0.0366112
itprRNAilSet2OE	Baseline	0.0390996
itprRNAilSet2OE	Baseline	0.0390996
itprRNAilSet2OE	Baseline	0.0462504
itprRNAilSet2OE	Baseline	0.0462504
itprRNAilSet2OE	Baseline	0.0462504
itprRNAilSet2OE	Baseline	0.0309
itprRNAilSet2OE	Baseline	0.125876
itprRNAilSet2OE	Baseline	0.0638693
itprRNAilSet2OE	Baseline	0.0309
itprRNAilSet2OE	Baseline	0.125876
itprRNAilSet2OE	Baseline	0.0638693
itprRNAilSet2OE	Baseline	0.0661394
itprRNAilSet2OE	Baseline	0.33981
itprRNAilSet2OE	Baseline	0.33981
itprRNAilSet2OE	Baseline	0.352124
itprRNAilSet2OE	Baseline	0.109477
itprRNAilSet2OE	Baseline	0.0744468
itprRNAilSet2OE	Baseline	0.115489
itprRNAilSet2OE	Baseline	0.067269
itprRNAilSet2OE	Baseline	0.0400373
itprRNAilSet2OE	Baseline	0.386336
itprRNAilSet2OE	Baseline	0.0390996
itprRNAilSet2OE	Baseline	0.102283
itprRNAilSet2OE	Baseline	0.0694973
itprRNAilSet2OE	Baseline	0.0653445
itprRNAilSet2OE	Baseline	0.0366112
itprRNAilSet2OE	Baseline	0.0390996
itprRNAilSet2OE	Baseline	0.0390996
itprRNAilSet2OE	Baseline	0.0462504
itprRNAilSet2OE	Baseline	0.0462504
itprRNAilSet2OE	Baseline	0.0462504
itprRNAilSet2OE	CCh	0.310357
itprRNAilSet2OE	CCh	1.25971
itprRNAilSet2OE	CCh	5.14092
itprRNAilSet2OE	CCh	0.310357
itprRNAilSet2OE	CCh	1.25971
itprRNAilSet2OE	CCh	5.14092
itprRNAilSet2OE	CCh	0.555381
itprRNAilSet2OE	CCh	1.80708
itprRNAilSet2OE	CCh	1.80708
itprRNAilSet2OE	CCh	1.75461
itprRNAilSet2OE	CCh	0.460413
itprRNAilSet2OE	CCh	0.364993
itprRNAilSet2OE	CCh	0.551395
itprRNAilSet2OE	CCh	0.368317
itprRNAilSet2OE	CCh	0.44284
itprRNAilSet2OE	CCh	0.537562
itprRNAilSet2OE	CCh	2.92094
itprRNAilSet2OE	CCh	1.11232
itprRNAilSet2OE	CCh	5.77685
itprRNAilSet2OE	CCh	2.62509
itprRNAilSet2OE	CCh	2.02418
itprRNAilSet2OE	CCh	1.24317
itprRNAilSet2OE	CCh	1.11232
itprRNAilSet2OE	CCh	1.11232
itprRNAilSet2OE	CCh	0.783782
itprRNAilSet2OE	CCh	0.783782
itprRNAilSet2OE	CCh	0.783782
itprRNAilSet2OE	CCh	0.310357
itprRNAilSet2OE	CCh	1.25971
itprRNAilSet2OE	CCh	5.14092
itprRNAilSet2OE	CCh	0.310357
itprRNAilSet2OE	CCh	1.25971
itprRNAilSet2OE	CCh	5.14092
itprRNAilSet2OE	CCh	0.555381
itprRNAilSet2OE	CCh	1.80708
itprRNAilSet2OE	CCh	1.80708
itprRNAilSet2OE	CCh	1.75461
itprRNAilSet2OE	CCh	0.460413
itprRNAilSet2OE	CCh	0.364993
itprRNAilSet2OE	CCh	0.551395
itprRNAilSet2OE	CCh	0.368317
itprRNAilSet2OE	CCh	0.537562
itprRNAilSet2OE	CCh	2.92094
itprRNAilSet2OE	CCh	1.11232
itprRNAilSet2OE	CCh	5.77685
itprRNAilSet2OE	CCh	2.62509
itprRNAilSet2OE	CCh	2.02418
itprRNAilSet2OE	CCh	1.24317
itprRNAilSet2OE	CCh	1.11232
itprRNAilSet2OE	CCh	1.11232
itprRNAilSet2OE	CCh	0.783782
itprRNAilSet2OE	CCh	0.783782
itprRNAilSet2OE	CCh	0.783782
