# Supplementary material for: Orai-mediated calcium entry determines activity of central dopaminergic neurons by regulation of gene expression
Source: eLife. 2024 Jan 30;12:RP88808. doi: 10.7554/eLife.88808 (PMC10945566; doi:10.7554/eLife.88808)
Supplement: Figure 4—figure supplement 2—source data 1. — Flight bout durations in seconds (s) are represented as a swarm plot where each genotype is represented by a different colour, and each fly as a single data point. The Δ Flight parameter shown below indicates the mean difference for comparisons against the shared Canton S control and is shown as a Cumming estimation plot. Mean differences are plotted as bootstrap sampling distributions. Each 95% confidence interval is indicated by the ends of the vertical error bars. The same letter beneath each distribution refers to statistically indistinguishable groups after performing a Kruskal–Wallis test followed by a post hoc Mann–Whitney U-test (p<0.005). At least 30 flies were tested for each genotype. [file elife-88808-fig4-figsupp2-data1.xlsx]

## Sheet: Sheet1
CS	Trl 13C/+	Trl62/+	TrlKG02898/+	TrlEY04024/+	Trl2.3/+	Trl13C/Trl62	Trl13C/TrlKG02898	Trl13C/TrlEY04024	Trl13C/Trl2.3
900	1	21	111	44	36	38	26	45	0
104	18	38	79	132	55	48	38	110	10
214	24	46	134	97	46	32	214	89	11
238	83	93	112	65	125	0	256	143	15
733	117	137	89	129	163	50	210	122	26
676	134	155	213	231	256	40	113	179	32
737	141	161	228	211	460	73	129	210	4
900	192	172	234	900	900	61	176	213	26
172	240	220	311	900	900	81	167	211	3
235	301	251	900	334	255	99	143	79	6
492	370	350	900	457	369	108	159	100	7
501	398	378	136	140	300	0	189	179	10
735	483	463	178	209	156	23	201	234	5
900	671	651	171	177	189	32	235	255	0
277	725	705	310	97	213	39	238	140	1
303	690	660	256	900	69	46	289	134	12
408	781	751	154	900	79	56	341	123	19
415	814	784	140	670	200	77	100	290	25
395	900	900	132	544	215	84	121	324	11
572	900	900	690	413	356	5	76	411	10
540	900	900	430	236	311	73	65	25	25
575	96	66	321	611	366	30	122	130	0
584	283	253	166	175	750	45	125	134	0
596	314	284	179	333	800	75	321	213	16
65	371	341	190	290	156	121	311	289	25
95	383	353	234	217	116	197	278	344	36
113	451	421	310	201	200	146	289	567	62
150	503	473	560	450	466	214			38
174	858	828	122	314	400	26			44
204	841	811			456	181			16
526	878	888			876
655	900	870			900
900	900	870			125
900	64	34			456
289	92	62			150
303	5	-25			750
404	57	27			600
510	72	42			800
900	75	45			650
203	430	400			590
293	611	402			710
327	114	84			120
438	176	146			63
442	241	211			150
495	615	585			200
900	576	546
810	632	587
650	498	450
900	667	630
609	677	325
759	714	684
	754	724
	900	800
	900	850
	900	780
