# Supplementary material for: Orai-mediated calcium entry determines activity of central dopaminergic neurons by regulation of gene expression
Source: eLife. 2024 Jan 30;12:RP88808. doi: 10.7554/eLife.88808 (PMC10945566; doi:10.7554/eLife.88808)
Supplement: Figure 4—figure supplement 3—source data 1. [file elife-88808-fig4-figsupp3-data1.xlsx]

## Sheet: Sheet1
CS	Trl 13C/+	Trl 13C/itpr ka1091	Trl 13C/itpr ug3	Trl 13C/itpr ka901	Trl 13C/itpr sv35
900	1	337	99	0	15
104	18	253	161	23	6
214	24	355	226	34	8
238	83	218	239	44	13
733	117	240	420	69	8
676	134	511	393	82	13
737	141	34	473	22	8
900	192	153	325	83	13
172	240	170	72	162	126
235	301	202	29	8	113
492	370	250	35	40	5
501	398	99	491	230	10
735	483	110	288	276	11
900	671	266	437	435	0
277	725	480	34	465	42
303	690	376	46	36	74
408	781	110	112	114	92
415	814	135	147	190	60
395	900	197	180	199	72
572	900	230	216	63	79
540	900	256	228	130	103
575	96	385	252	5	196
584	283	403	323	22	34
596	314	430	47	39	61
65	371	45	52	47	90
95	383	127	132	178	75
113	451	145	173	118	43
150	503	197	259	217	60
174	858	0		52	36
204	841	219		39	33
526	878	77		105	36
655	900	112		172	133
900	900	126		75	124
900	64	228		133	0
289	92	284		30	0
303	5	421		59	0
404	57			100	93
510	72			114	75
900	75			138	145
203	430			398	11
293	611			0	17
327	114			21	32
438	176			26	38
442	241			31	69
495	615			14	17
900	576			87	32
810	632			197	38
650	498			51	69
900	667			69	17
609	677				87
759	714				95
	754				202
	900
	900
	900
