# Supplementary material for: Orai-mediated calcium entry determines activity of central dopaminergic neurons by regulation of gene expression
Source: eLife. 2024 Jan 30;12:RP88808. doi: 10.7554/eLife.88808 (PMC10945566; doi:10.7554/eLife.88808)
Supplement: Figure 4—source data 1. [file elife-88808-fig4-data1.xlsx]

## Sheet: Panel B
Search Gene	Trl	Gcm2	Opa	hkb	brk	btd	h	Mad	odd	CTCF			TF_NAME	MATRIX_ID	Z_SCORE	P_VALUE	SAMPLE_AVERAGE	BACKGROUND_AVERAGE	SAMPLE_DEVSTD	SAMPLE_SIZE
Found FBGN	FBgn0013263	FBgn0019809	FBgn0003002	FBgn0261434	FBgn0024250	FBgn0000233	FBgn0001168	FBgn0011648	FBgn0002985	FBgn0035769			Trl	MA0535.1	3.6192	0.000132967	0.835194	0.824498	0.0540758	298
Found Gene	Trl	gcm2	opa	hkb	brk	btd	h	Mad	odd	CTCF			gcm2	MA1457.1	2.93115	0.00154428	0.801978	0.792375	0.0670603	298
embryo 00-02hr	32	0	3	3	1	1	2	79	3	67			opa	MA0205.2	2.93507	0.00155001	0.809481	0.797854	0.0733131	298
embryo 02-04hr	60	1	99	32	33	20	53	86	65	24			hkb	MA1700.1	2.698	0.003265	0.745846	0.734561	0.0795311	298
embryo 04-06hr	49	3	32	32	28	26	17	31	45	48			brk	MA0247.2	2.24989	0.0118046	0.86632	0.859864	0.0470147	298
embryo 06-08hr	84	4	20	27	34	18	15	49	40	56			btd	MA0449.1	2.12778	0.0160587	0.749233	0.741546	0.064379	298
embryo 08-10hr	71	7	25	13	29	7	18	62	29	43			h	MA1460.1	1.92384	0.0263605	0.815667	0.809103	0.0600318	298
embryo 10-12hr	81	8	17	7	30	3	16	58	23	28			Mad	MA0443.1	1.65137	0.0481311	0.830247	0.824861	0.0584037	298
embryo 12-14hr	77	8	15	6	26	3	14	43	21	19			odd	MA0255.1	1.58273	0.0558113	0.885809	0.881988	0.0367403	298
embryo 14-16hr	59	4	12	4	11	2	10	49	14	14			CTCF	MA0022.1	1.46933	0.0691908	0.849083	0.845901	0.0421635	298
embryo 16-18hr	41	1	7	3	4	2	22	39	11	10			tin	MA0213.1	1.45451	0.0717878	0.888953	0.884309	0.0503176	298
embryo 18-20hr	34	1	8	2	2	2	64	25	9	9			schlank	MA0193.1	1.39483	0.0802281	0.920793	0.916811	0.0476405	298
embryo 20-22hr	29	0	6	1	2	1	43	41	6	7			grh	MA0917.1	1.37639	0.0830619	0.865997	0.862169	0.045811	298
embryo 22-24hr	23	0	5	2	2	1	49	33	6	8			Bgb::run	MA0242.1	1.36011	0.0857138	0.854182	0.85048	0.0427582	298
larva L1	17	0	4	1	5	1	28	10	5	12			dl(var.2)	MA0023.1	1.11728	0.130369	0.837046	0.834017	0.046471	298
larva L2	18	0	2	0	2	0	18	8	3	8			vnd	MA0253.1	1.1025	0.133468	0.879087	0.875983	0.0495014	298
larva L3 12hr old	13	0	1	0	2	0	20	10	4	7			Deaf1	MA0185.1	1.06319	0.142524	0.971301	0.968448	0.0420807	298
larva L3 puffstage 1-2	14	0	2	0	5	1	20	11	3	7			Clamp	MA0456.1	0.998884	0.15752	0.778582	0.775991	0.0418251	298
larva L3 puffstage 3-6	25	1	4	0	11	2	31	21	6	9			pho	MA0531.1	0.981199	0.161841	0.794358	0.791884	0.0406654	298
larva L3 puffstage 7-9	26	1	4	0	11	3	26	26	7	11			cnc::maf-S	MA0530.1	0.931114	0.173993	0.841092	0.839093	0.0403587	298
white prepupae new	27	1	5	0	11	3	35	27	6	10			sna	MA0086.2	0.898779	0.182651	0.808927	0.806284	0.0529144	298
white prepupae 12hr	27	1	4	1	13	2	28	24	6	16			EcR::usp	MA0534.1	0.879691	0.187983	0.852142	0.850443	0.0327132	298
white prepupae 24hr	43	1	6	1	16	4	19	33	9	18			pan	MA0237.2	0.674605	0.24874	0.841667	0.840144	0.0360587	298
pupae 2d postWPP	29	1	3	1	7	3	11	20	5	11			Ets21C	MA0916.1	0.514988	0.302175	0.822767	0.821017	0.0562727	298
pupae 3d postWPP	21	0	1	0	3	1	10	15	2	7			tll	MA0459.1	0.388586	0.347753	0.837116	0.835964	0.0531893	298
pupae 4d postWPP	18	0	2	0	4	1	20	17	3	7			ttk	MA0460.1	0.31642	0.375134	0.829331	0.828367	0.0494104	298
adult male 01day	18	0	1	0	4	1	23	15	6	6			D	MA0445.1	0.258115	0.397473	0.871734	0.87109	0.0437115	298
adult male 05day	21	0	1	0	4	1	39	17	9	8			usp	MA0016.1	0.223223	0.411186	0.768832	0.768123	0.0506539	298
adult male 30day	27	1	1	0	4	1	39	19	10	10			h	MA0450.1	0.197714	0.421095	0.798731	0.798069	0.0590209	298
adult female 01day	25	0	1	0	5	1	21	31	6	17			cad	MA0216.2	0.149458	0.440138	0.888178	0.887826	0.0438196	298
adult female 05day	21	0	0	0	3	0	11	40	3	27			oc	MA0234.1	0.0587689	0.476419	0.889918	0.889709	0.0599809	298
adult female 30day	23	0	0	0	3	0	12	41	3	28			sv	MA1461.1	-0.0155169	0.506227	0.742645	0.742679	0.0354503	298
													odd	MA0454.1	-0.0297163	0.51193	0.811469	0.811547	0.0446816	298
													mirr	MA0233.1	-0.20073	0.580173	0.997604	0.997753	0.0139614	298
													Stat92E	MA0532.1	-0.500754	0.693139	0.815284	0.816535	0.0472068	298
													slp1	MA0458.1	-0.52395	0.70108	0.902175	0.903401	0.0407032	298
													dve	MA0915.1	-0.528256	0.702544	0.855415	0.857137	0.0558271	298
													gt	MA0447.1	-0.583456	0.721559	0.802329	0.804015	0.0506534	298
													vvl	MA0254.1	-0.71448	0.764145	0.972454	0.973595	0.0288058	298
													bap	MA0211.1	-0.789145	0.78664	0.880561	0.88328	0.0616689	298
													nub	MA0197.2	-0.81918	0.795299	0.845597	0.847762	0.0468176	298
													ind	MA0228.1	-0.836692	0.800146	0.915957	0.918923	0.0604107	298
													Su(H)	MA0085.1	-0.849552	0.803583	0.772728	0.774974	0.042568	298
													Eip74EF	MA0026.1	-0.865387	0.808258	0.880869	0.883743	0.0588945	298
													hb	MA0049.1	-0.86678	0.80871	0.917369	0.919388	0.042145	298
													Six4	MA0204.1	-1.02891	0.849816	0.904434	0.908146	0.0616356	298
													zen	MA0256.1	-1.05944	0.856954	0.898812	0.902782	0.065627	298
													CG11085	MA0171.1	-1.06596	0.858407	0.913069	0.916582	0.0573178	298
													Pdp1	MA1702.1	-1.102	0.866476	0.841929	0.845186	0.0527802	298
													B-H2	MA0169.1	-1.10645	0.867334	0.927174	0.930677	0.0547778	298
													Hsf	MA1458.1	-1.1132	0.868769	0.811624	0.815145	0.0544049	298
													fkh	MA0446.1	-1.11636	0.869543	0.889478	0.892257	0.0441326	298
													kni	MA0451.1	-1.15074	0.876478	0.824686	0.827457	0.0391609	298
													ct	MA0218.1	-1.17001	0.880647	0.961168	0.963898	0.0412692	298
													bcd	MA0212.1	-1.19332	0.885117	0.880791	0.885008	0.0597087	298
													br	MA0010.1	-1.20554	0.887659	0.882974	0.885392	0.0358293	298
													su(Hw)	MA0533.1	-1.23253	0.892478	0.748357	0.751116	0.0363405	298
													B-H1	MA0168.1	-1.23549	0.893259	0.943273	0.946695	0.0486637	298
													Scr	MA0203.1	-1.25878	0.897519	0.90926	0.913605	0.0608071	298
													tup	MA0248.1	-1.31844	0.90793	0.940753	0.944	0.0445287	298
													ara	MA0210.1	-1.31544	0.909305	0.996877	0.997663	0.0158669	298
													ems	MA0219.1	-1.35722	0.914137	0.955947	0.958878	0.0380546	298
													Dfd	MA0186.1	-1.36961	0.916221	0.902169	0.906703	0.0611069	298
													so	MA0246.1	-1.38841	0.918824	0.888634	0.893831	0.0629148	298
													vfl	MA1462.1	-1.40583	0.921369	0.821513	0.825823	0.0503657	298
													Gsc	MA0190.1	-1.46605	0.929985	0.891203	0.897229	0.0703311	298
													ro	MA0241.1	-1.48736	0.932817	0.904684	0.910069	0.0618956	298
													eve	MA0221.1	-1.48976	0.933282	0.946905	0.950478	0.0433504	298
													lms	MA0175.1	-1.54595	0.940238	0.936916	0.941722	0.0549174	298
													bsh	MA0214.1	-1.54886	0.940671	0.946358	0.95096	0.0542153	298
													Kr	MA0452.2	-1.58334	0.944483	0.804592	0.808754	0.0445991	298
													btn	MA0215.1	-1.61642	0.948184	0.924112	0.928938	0.0521994	298
													slou	MA0245.1	-1.64952	0.951593	0.94247	0.947373	0.0512148	298
													Hmx	MA0192.1	-1.66412	0.953076	0.913137	0.918513	0.056273	298
													Rx	MA0202.1	-1.67386	0.954004	0.913724	0.920237	0.0669527	298
													br(var.4)	MA0013.1	-1.67776	0.954364	0.912789	0.916115	0.0338378	298
													en	MA0220.1	-1.68276	0.95487	0.922182	0.928581	0.0657118	298
													Vsx2	MA0180.1	-1.69272	0.955729	0.86627	0.871609	0.0522698	298
													br(var.3)	MA0012.1	-1.76066	0.961987	0.909984	0.913185	0.0336735	298
													exd	MA0222.1	-1.77473	0.962917	0.899333	0.905059	0.0533048	298
													ovo	MA0126.1	-1.78912	0.964037	0.88619	0.890771	0.041361	298
													prd	MA0239.1	-1.78912	0.964037	0.88619	0.890771	0.041361	298
													Antp	MA0166.1	-1.83738	0.967838	0.904645	0.911389	0.0640663	298
													CG18599	MA0177.1	-1.83802	0.967875	0.921006	0.927575	0.0620514	298
													lbe	MA0231.1	-1.84471	0.968478	0.969006	0.972356	0.0335727	298
													Dr	MA0188.1	-1.88054	0.970858	0.890828	0.897586	0.0631182	298
													pb	MA0238.1	-1.90194	0.972232	0.909953	0.917691	0.0702308	298
													unc-4	MA0250.1	-1.91429	0.973067	0.913385	0.920208	0.063469	298
													twi	MA0249.2	-1.93433	0.974179	0.833646	0.840025	0.0543344	298
													zen2	MA0257.1	-1.94185	0.974734	0.929776	0.935881	0.055498	298
													CG34031	MA0444.1	-1.95342	0.975415	0.922316	0.927866	0.0502169	298
													CG11294	MA0172.1	-1.97434	0.976543	0.887262	0.895091	0.0672571	298
													slbo	MA0244.1	-1.98283	0.977031	0.929315	0.933164	0.0333469	298
													sd	MA0243.1	-1.98579	0.977199	0.902766	0.905791	0.026284	298
													E5	MA0189.1	-2.01506	0.978775	0.946825	0.951815	0.0435902	298
													onecut	MA0235.1	-2.02612	0.979293	0.922555	0.929904	0.0619054	298
													caup	MA0217.1	-2.02616	0.979339	0.979684	0.982784	0.0269689	298
													al	MA0208.1	-2.03365	0.979673	0.884935	0.893083	0.0686411	298
													ftz	MA0225.1	-2.05715	0.980862	0.926872	0.933509	0.0576388	298
													exex	MA0224.1	-2.12254	0.98372	0.908637	0.915855	0.0601771	298
													ap	MA0209.1	-2.13053	0.984058	0.925177	0.931549	0.0535713	298
													NK7.1	MA0196.1	-2.16673	0.985489	0.944844	0.949761	0.0417265	298
													CG32532	MA0179.1	-2.17621	0.985792	0.927396	0.93486	0.0606877	298
													Ptx1	MA0201.1	-2.19192	0.986287	0.85103	0.858044	0.0530134	298
													Dll	MA0187.1	-2.23693	0.9879	0.948406	0.953458	0.0415639	298
													HGTX	MA0191.1	-2.24628	0.988128	0.925967	0.933403	0.0570201	298
													OdsH	MA0198.1	-2.26489	0.988733	0.919055	0.926929	0.0623402	298
													vis	MA0252.1	-2.27421	0.988964	0.888027	0.898764	0.0806877	298
													unpg	MA0251.1	-2.2852	0.989307	0.92417	0.931699	0.0580317	298
													Lim1	MA0194.1	-2.33535	0.99063	0.879532	0.889033	0.0695559	298
													Awh	MA0167.1	-2.3675	0.991437	0.929499	0.936051	0.0487988	298
													CG9876	MA0184.1	-2.37314	0.991576	0.921017	0.928594	0.0568444	298
													Vsx1	MA0181.1	-2.43006	0.992795	0.926845	0.934479	0.0551536	298
													lbl	MA0232.1	-2.45316	0.993312	0.95628	0.962063	0.0454044	298
													achi	MA0207.1	-2.47581	0.993647	0.894299	0.903734	0.0649016	298
													otp	MA0236.1	-2.47501	0.993655	0.925759	0.93313	0.0526633	298
													lab	MA0230.1	-2.51317	0.994318	0.909575	0.918498	0.0636501	298
													hth	MA0227.1	-2.52385	0.994451	0.887425	0.897944	0.0695844	298
													inv	MA0229.1	-2.54015	0.994717	0.898149	0.90673	0.0576254	298
													abd-A	MA0206.1	-2.54481	0.994797	0.926901	0.93417	0.0496534	298
													Abd-B	MA0165.1	-2.58054	0.995331	0.954891	0.959897	0.0350039	298
													Ubx	MA0094.2	-2.59416	0.995504	0.912905	0.921509	0.0586065	298
													repo	MA0240.1	-2.64129	0.996084	0.908031	0.9173	0.0610948	298
													Cf2	MA0015.1	-2.71256	0.996858	0.860306	0.87028	0.0667151	298
													Pph13	MA0200.1	-2.71197	0.996864	0.920229	0.929438	0.0633537	298
													hbn	MA0226.1	-2.75555	0.997246	0.918226	0.928353	0.0664122	298
													C15	MA0170.1	-2.78746	0.997526	0.961752	0.96775	0.0411388	298
													CG15696-RA	MA0176.1	-2.92302	0.998386	0.945159	0.952588	0.0466879	298
													CG11617	MA0173.1	-3.01101	0.998775	0.887374	0.898111	0.0591201	298
													HHEX	MA0183.1	-3.06431	0.998984	0.938569	0.945071	0.0372594	298
													CG32105	MA0178.1	-3.0925	0.999078	0.92615	0.934739	0.0491766	298
													Lim3	MA0195.1	-3.09577	0.999091	0.944905	0.951449	0.0382058	298
													PHDP	MA0457.1	-3.16375	0.999286	0.952311	0.960209	0.0470776	298
													CG4328-RA	MA0182.1	-3.25676	0.999489	0.977331	0.982701	0.0319257	298
													H2.0	MA0448.1	-3.26892	0.999505	0.961076	0.967942	0.0382363	298
													br(var.2)	MA0011.1	-3.32412	0.999588	0.918059	0.925555	0.0376682	298
													dmrt99B	MA1455.1	-3.36641	0.999649	0.772181	0.779797	0.0392663	298
													Dbx	MA0174.1	-3.52934	0.999813	0.957722	0.965492	0.0421529	298
													Optix	MA0199.1	-3.82388	0.999942	0.946242	0.959983	0.0699777	298
													pnr	MA0536.1	-3.89017	0.999954	0.834793	0.84882	0.0519091	298
													Dref	MA1456.1	-4.13118	0.999983	0.823024	0.841288	0.0626234	298
													BEAF-32	MA0529.2	-4.42815	0.999996	0.799717	0.818345	0.058133	298
													M1BP	MA1459.1	-4.70524	0.999999	0.752044	0.77013	0.0454091	298

## Sheet: Panel C
CS	Trl RNAi 1/+	Trl RNAi 2/+	THD'GAL4>Trl RNAi 1	THD'GAL4>Trl RNAi 2	THD'>Trl RNAi-1;STIM_OE	THD'>Trl RNAi-1;Set2_OE
900	223	229	131	556	44	87
104	307	317	160	501	68	77
214	484	384	165	487	109	96
238	611	615	133	475	129	108
733	900	900	217	409	106	137
676	223	210	241	373	139	157
737	307	301	257	306	177	218
900	484	384	373	250	167	223
172	611	711	515	249	226	273
235	900	900	45	190	293	237
492	241	341	194	180	338	287
501	250	350	371	180	343	257
735	284	354	13	172	399	313
900	331	431	121	170	421	419
277	360	260	48	154	900	421
303	391	491	191	149	228	469
408	421	521	74	141	251	463
415	449	249	108	138	660	181
395	471	371	132	134	299	119
572	477	277	158	130	279	113
540	371	571	181	129	371	156
575	345	245	196	120	900	189
584	397	357	322	112	481	376
596	431	491	110	110	491	396
65	416	316	89	104	456	221
95	367	267	111	101	535	191
113	494	594	71	99	558	195
150	567	267	138	89	491	250
174	595	495	166	82	900	254
204	676	576	22	81	900	264
526	889	789	90	73	765	371
655			29	71	99	354
900			56	68	165	355
900			68	61	127	191
289			75	54	235	300
303			82	45	249	314
404			146	44	339	434
510			133	40	157	456
900			131	8	202	238
203			189	7	213	733
293			241	6	266	676
327			211		218	737
438					297	900
442						172
495						235
900						492
810						501
650						731
900						74
609						153
759						184
						227
						240
						345
						357
						374
						520
						900
						168
						217
						296
						425
						333
						356
						402
						245
						256
						201
						289

## Sheet: Panel D
CS	dSTIM-KO/+	dSTIM-KO;Trl13C	dSTIM-KO;Trl13C;UAS-STIM	dSTIM-KO;Trl13C;UAS-Set2
900	32	21	132	132
104	149	39	174	174
214	173	81	234	234
238	189	131	258	258
733	207	140	316	316
676	229	167	900	900
737	241	3	900	900
900	293	52	9	9
172	313	43	70	70
235	361	110	74	74
492	373	130	174	174
501	388	239	190	190
735	90	142	220	220
900	457	5	279	279
277	216	0	287	287
303	254	13	293	293
408	623	26	302	302
415	689	27	318	318
395	750	35	392	392
572	900	39	580	580
540	900	43	51	51
575	900	68	50	50
584	900	69	86	86
596	900	21	900	900
65	112	22	109	109
95	62	23	130	130
113	157	51	148	148
150	131	55	20	20
174	205	44	175	175
204	242	71	263	263
526	333	86	272	272
655	343	96	335	335
900	526	134	354	354
900	493	125	436	436
289	604	145	465	465
303	661	175	530	530
404	681	355	456	456
510		76	900	900
900		144
203
293
327
438
442
495
900
810
650
900
609
759

## Sheet: Panel E
Genotype	DDCT	Gene
WT	0.954141	Set2
WT	0.971361	Set2
WT	1.06726	Set2
Trl_RNAi	0.692641	Set2
Trl_RNAi	0.672641	Set2
Trl_RNAi	0.692641	Set2
WT	0.892795	itpr
WT	1.06726	itpr
WT	1.04949	itpr
Trl_RNAi	0.51	itpr
Trl_RNAi	0.43	itpr
Trl_RNAi	0.39	itpr
WT	1.0956	mAChR
WT	0.941414	mAChR
WT	0.971361	mAChR
Trl_RNAi	0.29027	mAChR
Trl_RNAi	0.267621	mAChR
Trl_RNAi	0.252652	mAChR

## Sheet: Panel F
H3K36me3/Total H3	Genotype
1.02	WT
0.99	WT
1.01	WT
0.95	13C/62
0.78	13C/62
0.33	13C/62

## Sheet: Panel H
Time	WT-1	WT-2	WT-3	WT-4	WT-5	WT-6	WT-7	WT-8	WT-9	WT-10	WT-11	WT-12	WT-13	WT-14	WT-15	WT-16	WT-17	WT-18	WT-19	WT-20	WT-21	WT-22	WT-23	WT-24	WT-25	WT-26	WT-27	WT-28	WT-29	WT-30	WT-31	WT-32	WT-33	WT-34	WT-35	WT-36	WT-37	WT-38	WT-39	WT-40	WT-41	WT-42	WT-43	WT-44	WT-45	WT-46	WT-47	WT-48	WT-49
1	-0.0213588	-0.00414845	-0.0204678	0.0109283	0.010682	-0.0213588	0.0703454	0.0614712	0.101461	0.0135278	0.0287523	0.013108	-0.0214806	-0.0209708	0.0411943	-0.148433	-0.115654	-0.0045393	-0.098526	-0.0899518	-0.0213588	-0.00414845	-0.036433	0.0109283	0.010682	-0.0213588	0.0703454	0.101461	0.0135278	0.0287523	0.013108	-0.0214806	-0.0209708	0.0597003	0.0879854	-0.0244483	-0.0342515	-0.0287061	-0.098526	-0.0899518	-0.098526	-0.0899518	-0.0711325	0.0177252	0.0971483	0.0217532	0.0503414	0.0258784	0.0176268
2	-0.0479827	-0.0823621	-0.036433	-0.0112837	0.031796	-0.0479827	-0.104749	-0.0286782	0.0226738	-0.0518761	-0.0592354	-0.0362756	-0.00638746	0.0239481	0.055432	-0.125811	-0.0698692	-0.0287061	-0.0992411	-0.0671681	-0.0479827	-0.0823621	0.0532835	-0.0112837	0.031796	-0.0479827	-0.104749	0.0226738	-0.0518761	-0.0592354	-0.0362756	-0.00638746	0.0239481	0.0597003	0.0879854	-0.063077	-0.069946	-0.0572238	-0.0992411	-0.0671681	-0.0992411	-0.0671681	-0.0896704	0.00217027	0.0860924	0.042865	0.029877	0.0324894	0.00264166
3	-0.0299183	0.029526	0.0532835	0.0243903	0.0508428	-0.0299183	0.0790355	0.00611115	-0.0211099	-0.0230919	0.0538343	0.0121842	-0.00429813	0.0146449	0.019912	-0.141068	-0.0853964	-0.0572238	-0.0929494	-0.0808694	-0.0299183	0.029526	0.00330665	0.0243903	0.0508428	-0.0299183	0.0790355	-0.0211099	-0.0230919	0.0538343	0.0121842	-0.00429813	0.0146449	0.0597003	0.0879854	-0.034453	-0.0428642	0.0643347	-0.0929494	-0.0808694	-0.0929494	-0.0808694	-0.0860408	0.00889315	0.0842705	-0.0702428	-0.00757916	0.000974498	0.00789206
4	0.0331994	-0.0570795	0.00330665	-0.0301286	-0.0127278	0.0331994	-0.017336	-0.0048502	0.0204335	0.0198715	-0.0115005	-0.0104543	-0.0499909	-0.00436249	0.0683796	-0.121337	-0.0482839	0.0643347	-0.069215	-0.0971015	0.0331994	-0.0570795	-0.0193053	-0.0301286	-0.0127278	0.0331994	-0.017336	0.0204335	0.0198715	-0.0115005	-0.0104543	-0.0499909	-0.00436249	0.0597003	0.0879854	-0.0182064	-0.0683625	0.0512627	-0.069215	-0.0971015	-0.069215	-0.0971015	-0.104131	0.00364368	-0.0659897	0.007492	-0.0484969	-0.021006	0.001372
5	-0.0401795	-0.0644576	-0.0193053	-0.0809375	0.0607074	-0.0401795	0.0383188	0.00202153	-0.0302311	0.0240856	0.0324588	-0.00772013	-0.0411411	0.0171759	-0.0802868	-0.0889398	-0.0763628	0.0512627	-0.0120162	-0.0712262	-0.0401795	-0.0644576	-0.0370049	-0.0809375	0.0607074	-0.0401795	0.0383188	-0.0302311	0.0240856	0.0324588	-0.00772013	-0.0411411	0.0171759	0.0597003	0.0879854	-0.0224768	-0.0834527	-0.0316622	-0.0120162	-0.0712262	-0.0120162	-0.0712262	-0.117862	0.000748391	0.0491401	0.025955	-0.0275183	-0.021928	0.00018946
6	-0.0510795	0.0146945	-0.0370049	0.0112242	0.0501595	-0.0510795	0.0251187	-0.0220855	-0.0116919	0.00610298	0.00594346	0.00525231	0.0111855	0.030391	0.0569657	-0.0802643	-0.0196789	-0.0316622	-0.0501953	-0.0442903	-0.0510795	0.0146945	-0.0667229	0.0112242	0.0501595	-0.0510795	0.0251187	-0.0116919	0.00610298	0.00594346	0.00525231	0.0111855	0.030391	0.0597003	0.0663644	-0.0233327	-0.0208567	-0.0606399	-0.0501953	-0.0442903	-0.0501953	-0.0442903	-0.0938981	0.00532609	-0.0199983	0.00463596	0.0694973	-0.0217685	0.00612689
7	-0.0328987	0.0115752	-0.0667229	-0.0601136	-0.0213686	-0.0328987	0.134586	0.0225583	0.0251309	0.0353869	0.0878286	0.0300529	-0.0230599	0.0365602	0.0879854	-0.0531987	-0.0293043	-0.0606399	-0.0548634	-0.072646	-0.0328987	0.0115752	-0.0449734	-0.0601136	-0.0213686	-0.0328987	0.134586	0.0251309	0.0353869	0.0878286	0.0300529	-0.0230599	0.0365602	0.0338584	-0.00411072	-0.0298461	-0.0490211	0.0155851	-0.0548634	-0.072646	-0.0548634	-0.072646	-0.0453242	0.00481136	0.0575148	-0.0374281	0.0223153	0.0450853	0.00481935
8	0.0167785	-0.0153675	-0.0449734	-0.0240175	-0.0418472	0.0167785	0.0353286	-0.017276	0.0596412	0.0136075	0.00321156	-0.0350508	-0.00456545	-0.0216676	0.0663644	-0.0289646	-0.0531089	0.0155851	-0.0731866	-0.00754241	0.0167785	-0.0153675	-0.0312488	-0.0240175	-0.0418472	0.0167785	0.0353286	0.0596412	0.0136075	0.00321156	-0.0350508	-0.00456545	-0.0216676	0.0379365	0.019811	-0.000504888	-0.0297975	0.0363114	-0.0731866	-0.00754241	-0.0731866	-0.00754241	-0.0860015	-0.000361426	0.0239457	-0.0490572	0.0474193	-0.0321256	-0.00035681
9	0.00437675	0.0695316	-0.0312488	0.0473093	0.00758988	0.00437675	-0.00331894	0.0179984	0.0310336	-0.00800217	-0.0256039	0.000733617	0.00331001	0.014971	-0.00411072	-0.0304707	-0.0245204	0.0363114	-0.0359975	-0.048379	0.00437675	0.0695316	0.0569022	0.0473093	0.00758988	0.00437675	-0.00331894	0.0310336	-0.00800217	-0.0256039	0.000733617	0.00331001	0.014971	0.148872	0.0597003	-0.00275373	-0.0221808	0.0243895	-0.0359975	-0.048379	-0.0359975	-0.048379	-0.0290792	0.00164223	0.0941689	0.00280181	0.0221581	-0.0599237	0.00285746
10	-0.00487969	-0.0322887	0.0569022	-0.140965	0.00946807	-0.00487969	0.0328559	0.0166414	0.0413678	0.000191607	-0.0292084	-0.000688598	-0.0791642	-0.0280373	0.019811	-0.011207	0.0206065	0.0243895	-0.0628417	-0.0505	-0.00487969	-0.0322887	-0.0364424	-0.140965	0.00946807	-0.00487969	0.0328559	0.0413678	0.000191607	-0.0292084	-0.000688598	-0.0791642	-0.0280373	0.0804594	0.0338584	0.0151544	-0.00629137	-0.0313881	-0.0628417	-0.0505	-0.0628417	-0.0505	-0.0230255	-0.00678379	-0.0385696	0.0118416	0.0103264	0.0189794	-0.00566052
11	-0.0659562	0.0380103	-0.0364424	0.0644462	-0.00799434	-0.0659562	0.00525709	0.0396122	0.0135526	0.0159368	-0.00171247	0.0157876	0.0159058	-0.000662197	0.0597003	-0.00717047	-0.00383107	-0.0313881	-0.0430323	-0.0377891	-0.0659562	0.0380103	0.0094565	0.0644462	-0.00799434	-0.0659562	0.00525709	0.0135526	0.0159368	-0.00171247	0.0157876	0.0159058	-0.000662197	0.10985	0.0379365	-0.0132778	-0.0417265	-0.042708	-0.0430323	-0.0377891	-0.0430323	-0.0377891	-0.0238541	0.00384713	-0.0293192	0.0453971	0.0314026	-0.00925624	0.00493175
12	0.056112	0.116254	0.0094565	0.072116	-0.033567	0.056112	-0.0826009	0.0293614	0.0646792	-0.0454527	-0.0297512	0.0319284	0.0585947	-0.00920818	0.0338584	-0.0249431	-0.0528952	-0.042708	-0.0340361	-0.00323021	0.056112	0.116254	-0.0349987	0.072116	-0.033567	0.056112	-0.0826009	0.0646792	-0.0454527	-0.0297512	0.0319284	0.0585947	-0.00920818	0.163734	0.148872	0.00730408	-0.0443002	0.0022145	-0.0340361	-0.00323021	-0.0340361	-0.00323021	-0.0394205	-6.78e-05	-0.0979129	-0.0460534	0.00592432	0.00300703	-0.00111019
13	0.0506832	-0.0398359	-0.0349987	-0.0360342	0.0413479	0.0506832	-0.0847731	-0.0250438	-0.0230121	-0.0234042	-0.0584647	-0.0297673	-0.016194	0.00240971	0.0379365	-0.0143699	-0.0331183	0.0022145	-0.0317161	-0.0319694	0.0506832	-0.0398359	0.00176919	-0.0360342	0.0413479	0.0506832	-0.0847731	-0.0230121	-0.0234042	-0.0584647	-0.0297673	-0.016194	0.00240971	0.156737	0.0804594	0.0260739	-0.0347406	-0.0331646	-0.0317161	-0.0319694	-0.0317161	-0.0319694	-0.0262764	-0.00593143	0.040573	-0.0134745	0.0579613	0.0653445	-0.00470297
14	-0.000779318	-0.00812827	0.00176919	-0.0670091	-0.0315081	-0.000779318	-0.074367	-0.0321505	0.00121299	-0.0434976	-0.0572562	-0.0271587	-0.00726154	0.00833081	0.148872	-0.0162526	-0.049673	-0.0331646	-0.00683558	-0.0154634	-0.000779318	-0.00812827	0.0142001	-0.0670091	-0.0315081	-0.000779318	-0.074367	0.00121299	-0.0434976	-0.0572562	-0.0271587	-0.00726154	0.00833081	0.0689028	0.10985	-0.00417032	0.000452996	0.0138085	-0.00683558	-0.0154634	-0.00683558	-0.0154634	-0.00705041	-0.0060432	-0.0186131	0.0141331	-0.00450604	-0.0169118	-0.00507015
15	0.0485658	-0.030076	0.0142001	-0.0445575	0.00463973	0.0485658	-0.0944555	-0.0278896	0.12144	-0.0170793	-0.0581318	-0.0141834	-0.043496	-0.0232457	0.0804594	-0.0194457	-0.0128236	0.0138085	-0.0440596	-0.0228323	0.0485658	-0.030076	-0.0203646	-0.0445575	0.00463973	0.0485658	-0.0944555	0.12144	-0.0170793	-0.0581318	-0.0141834	-0.043496	-0.0232457	0.116942	0.163734	0.0147737	0.00619383	0.0564064	-0.0440596	-0.0228323	-0.0440596	-0.0228323	0.0369078	-0.00319547	-0.00782021	-0.0875982	-0.0452335	0.0357843	-0.00268565
16	-0.0354222	-0.0607064	-0.0203646	0.0553652	-0.00497817	-0.0354222	0.0353187	-0.00478157	0.0201135	-0.0013003	0.00146626	-0.0185851	0.0212945	0.0330874	0.10985	-0.018798	-0.00161172	0.0564064	-0.0019112	-0.0203541	-0.0354222	-0.0607064	0.0208843	0.0553652	-0.00497817	-0.0354222	0.0353187	0.0201135	-0.0013003	0.00146626	-0.0185851	0.0212945	0.0330874	0.0558184	0.156737	0.0204873	0.0117319	-0.0797267	-0.0019112	-0.0203541	-0.0019112	-0.0203541	-0.0127048	-0.00202642	0.0175855	0.00667735	0.0152286	0.0209419	-0.00106657
17	-0.0239077	-0.0131086	0.0208843	0.00848203	0.00342583	-0.0239077	-0.00497471	-0.00683354	-0.0568951	0.0159856	-0.00134661	-0.0159228	-0.00797381	-0.0214815	0.163734	-0.0247925	0.0467784	-0.0797267	0.00329039	0.0128967	-0.0239077	-0.0131086	-0.0132679	0.00848203	0.00342583	-0.0239077	-0.00497471	-0.0568951	0.0159856	-0.00134661	-0.0159228	-0.00797381	-0.0214815	0.0486252	0.0689028	-0.00962421	0.0145412	-0.018179	0.00329039	0.0128967	0.00329039	0.0128967	-0.00156478	-0.00262238	0.0643305	0.0312074	0.0103783	-0.0143016	-0.00246174
18	0.0413443	0.0191515	-0.0132679	0.118442	0.0451802	0.0413443	-0.0607841	0.0137764	0.0663956	-0.0321474	-0.0223202	0.0370193	0.0328931	-0.00297368	0.156737	-0.0215392	0.0200557	-0.018179	-0.0164467	-0.012685	0.0413443	0.0191515	0.0129627	0.118442	0.0451802	0.0413443	-0.0607841	0.0663956	-0.0321474	-0.0223202	0.0370193	0.0328931	-0.00297368	0.0757155	0.116942	0.0016082	-0.00901416	0.0363652	-0.0164467	-0.012685	-0.0164467	-0.012685	0.0542289	0.00851856	0.084024	-0.0184458	-0.0340655	0.0172211	0.00902
19	-0.0354392	0.0216562	0.0129627	0.011862	-0.0179729	-0.0354392	-0.0184435	-0.0181867	0.00490637	-0.0218232	-0.0293134	0.0153717	0.0136828	-0.00431954	0.0689028	-0.0244913	0.0275933	0.0363652	0.0396712	0.0242469	-0.0354392	0.0216562	0.0687988	0.011862	-0.0179729	-0.0354392	-0.0184435	0.00490637	-0.0218232	-0.0293134	0.0153717	0.0136828	-0.00431954	0.138183	0.0558184	0.0346443	0.00572413	-0.0130941	0.0396712	0.0242469	0.0396712	0.0242469	0.040228	0.00010499	-0.0631347	0.0351877	0.00408108	0.0217316	0.000518468
20	0.0136574	-0.0372069	0.0687988	0.021591	-0.0914452	0.0136574	0.0283568	0.0133453	0.00605749	0.00149128	0.0247759	0.019738	-0.0273934	-0.0393116	0.116942	-0.0712726	0.0257274	-0.0130941	0.00906733	-0.005463	0.0136574	-0.0372069	0.0212687	0.021591	-0.0914452	0.0136574	0.0283568	0.00605749	0.00149128	0.0247759	0.019738	-0.0273934	-0.0393116	0.103085	0.0486252	0.0223879	-0.0288506	-0.0367177	0.00906733	-0.005463	0.00906733	-0.005463	0.0533009	-0.00303725	0.00680903	0.0858462	-0.0197474	-0.025038	-0.00158009
21	0.0575568	-0.0490261	0.0212687	-0.0460709	-0.0390208	0.0575568	-0.000619263	-0.0270912	0.0201754	0.0127251	0.019552	-0.0134253	-0.0197061	-0.0345057	0.0558184	-0.0555483	0.0410985	-0.0367177	0.0151122	0.00421533	0.0575568	-0.0490261	0.000231725	-0.0460709	-0.0390208	0.0575568	-0.000619263	0.0201754	0.0127251	0.019552	-0.0134253	-0.0197061	-0.0345057	0.162824	0.0757155	-0.0150338	0.0209142	0.0269295	0.0151122	0.00421533	0.0151122	0.00421533	0.040528	-0.00429439	0.0637529	-0.0630372	-0.0260713	-0.0385461	-0.00368233
22	0.0191529	0.0646596	0.000231725	0.0268827	-0.0487617	0.0191529	-0.0222496	-0.011286	0.0540663	-0.0206407	-0.0509137	-0.00653847	0.0194496	-0.00673602	0.0486252	-0.0890001	-0.000830835	0.0269295	0.0191188	0.00770146	0.0191529	0.0646596	-0.0198959	0.0268827	-0.0487617	0.0191529	-0.0222496	0.0540663	-0.0206407	-0.0509137	-0.00653847	0.0194496	-0.00673602	0.078349	0.138183	-0.0113713	-0.0129731	-0.00358006	0.0191188	0.00770146	0.0191188	0.00770146	0.0516867	-0.00323149	-0.0295469	-0.0557721	-0.0287088	-0.00928736	-0.00355783
23	-0.0274772	-0.000521552	-0.0198959	-0.0098043	-0.0201259	-0.0274772	-0.0360078	-0.00418419	-0.00847342	0.0202391	-0.000120106	0.0167115	-0.0272034	-0.000698786	0.0757155	-0.0863793	0.00770135	-0.00358006	0.0111778	0.00664752	-0.0274772	-0.000521552	-0.027827	-0.0098043	-0.0201259	-0.0274772	-0.0360078	-0.00847342	0.0202391	-0.000120106	0.0167115	-0.0272034	-0.000698786	0.12605	0.103085	0.00703552	-0.0261964	-0.0438826	0.0111778	0.00664752	0.0111778	0.00664752	0.0722494	-0.00513607	-0.0268469	0.0379842	-0.0162135	-0.0478685	-0.00516619
24	-0.0940661	0.0935849	-0.027827	-0.0354544	-0.0605524	-0.0940661	0.0637969	0.0304388	-0.0451104	0.0265124	0.0155936	0.00976718	0.020387	0.00429486	0.138183	-0.102315	0.0189378	-0.0438826	0.0105628	-0.000320358	-0.0940661	0.0935849	0.0579991	-0.0354544	-0.0605524	-0.0940661	0.0637969	-0.0451104	0.0265124	0.0155936	0.00976718	0.020387	0.00429486	0.124712	0.162824	0.00280935	0.00220358	0.0601503	0.0105628	-0.000320358	0.0105628	-0.000320358	0.0817321	0.00084513	-0.125195	0.0286491	-0.0606054	-0.00287078	-6.69e-05
25	-0.0503244	-0.00413259	0.0579991	0.0609187	-0.0576303	-0.0503244	-0.0430323	0.0424826	-0.0553414	1.44e-05	-0.0317184	0.0149337	0.00801981	-0.0071385	0.103085	-0.0954314	0.0803893	0.0601503	0.0306657	0.0190232	-0.0503244	-0.00413259	-0.0489764	0.0609187	-0.0576303	-0.0503244	-0.0430323	-0.0553414	1.44e-05	-0.0317184	0.0149337	0.00801981	-0.0071385	0.130603	0.078349	-0.00204248	0.0528959	0.026303	0.0306657	0.0190232	0.0306657	0.0190232	0.0483458	0.00041649	-0.0604535	-0.0125575	0.039878	0.0154434	0.000127617
26	0.00357922	-0.0451071	-0.0489764	0.0824376	0.00677374	0.00357922	-0.0809144	-0.00172529	-0.0592696	-0.0159578	-0.0862576	-0.014906	0.0124253	0.0189656	0.162824	-0.0865751	0.0133977	0.026303	0.0468155	0.0275818	0.00357922	-0.0451071	-0.0391611	0.0824376	0.00677374	0.00357922	-0.0809144	-0.0592696	-0.0159578	-0.0862576	-0.014906	0.0124253	0.0189656	0.200793	0.12605	0.0420814	0.00165335	0.0682451	0.0468155	0.0275818	0.0468155	0.0275818	0.029568	0.00401721	-4.19e-05	-0.0289791	-0.0496151	-0.0718193	0.00307569
27	-0.0941655	-0.0808408	-0.0391611	-0.0341907	-0.0551456	-0.0941655	-0.068336	0.0068262	-0.105655	-0.0142755	-0.0163406	0.00633431	-0.0381601	-0.012323	0.078349	-0.0429869	0.0198174	0.0682451	0.023512	0.0071471	-0.0941655	-0.0808408	0.0043285	-0.0341907	-0.0551456	-0.0941655	-0.068336	-0.105655	-0.0142755	-0.0163406	0.00633431	-0.0381601	-0.012323	0.172074	0.124712	0.0248344	0.0198004	-0.00918376	0.023512	0.0071471	0.023512	0.0071471	0.0687791	-0.00819554	-0.0892589	0.0513593	-0.0213925	-0.0699774	-0.00908477
28	0.00118057	0.0211037	0.0043285	-0.0987463	0.126108	0.00118057	-0.0407767	0.0390639	-0.00971745	-0.00760457	0.0526317	0.0277825	-0.025895	0.0108125	0.12605	-0.00848083	0.029525	-0.00918376	0.0403956	0.0217621	0.00118057	0.0211037	0.0499743	-0.0987463	0.126108	0.00118057	-0.0407767	-0.00971745	-0.00760457	0.0526317	0.0277825	-0.025895	0.0108125	0.212588	0.130603	-0.018593	0.0295568	0.054439	0.0403956	0.0217621	0.0403956	0.0217621	0.0412254	0.00407485	-0.0551451	0.0397731	0.0256778	-0.0109309	0.00366169
29	0.00340469	-0.116405	0.0499743	-0.0686821	-0.00502521	0.00340469	0.02067	0.00724255	-0.134201	0.0100404	0.00760779	-0.0234795	-0.0264788	-0.00379138	0.124712	0.0438431	0.0212805	0.054439	0.0325898	0.0440615	0.00340469	-0.116405	0.0148657	-0.0686821	-0.00502521	0.00340469	0.02067	-0.134201	0.0100404	0.00760779	-0.0234795	-0.0264788	-0.00379138	0.122168	0.200793	0.0319558	0.0276153	-0.00743658	0.0325898	0.0440615	0.0325898	0.0440615	0.0969797	0.000391071	0.0280638	0.00886643	-0.0195225	-0.0457893	-0.000138286
30	-0.0661392	0.0020453	0.0148657	-0.0407912	-0.0586074	-0.0661392	0.0924209	-0.035628	0.0413678	0.0301957	0.0498429	-0.0163196	-0.0262432	-0.0562986	0.130603	0.0985016	-0.0107028	-0.00743658	0.0131485	0.0335593	-0.0661392	0.0020453	0.0943919	-0.0407912	-0.0586074	-0.0661392	0.0924209	0.0413678	0.0301957	0.0498429	-0.0163196	-0.0262432	-0.0562986	0.205686	0.172074	0.0205315	0.0111697	0.0512921	0.0131485	0.0335593	0.0131485	0.0335593	0.0611694	0.00470508	0.0818358	0.0198452	-0.0091456	0.0411545	0.00491636
31	0.0700094	0.0428665	0.0943919	0.0173925	0.011697	0.0700094	-0.027422	-0.0516686	-0.119538	-0.0278358	0.00126234	-0.00867466	0.000853105	-0.0266056	0.200793	0.157302	-0.00439002	0.0512921	0.0469995	0.0383601	0.0700094	0.0428665	0.081286	0.0173925	0.011697	0.0700094	-0.027422	-0.119538	-0.0278358	0.00126234	-0.00867466	0.000853105	-0.0266056	0.30123	0.212588	-2.38e-05	0.0311478	0.00574311	0.0469995	0.0383601	0.0469995	0.0383601	0.123058	0.00663503	-0.0595238	-0.100144	-0.0304262	0.00994098	0.00493147
32	0.019651	0.00604229	0.081286	0.0319126	0.0692534	0.019651	-0.0395771	0.00401995	-0.0153001	-0.00736546	-0.0414495	-0.00783993	0.0420313	0.0336697	0.172074	0.12998	-0.0302167	0.00574311	0.0411923	0.0483145	0.019651	0.00604229	-0.047889	0.0319126	0.0692534	0.019651	-0.0395771	-0.0153001	-0.00736546	-0.0414495	-0.00783993	0.0420313	0.0336697	0.287426	0.122168	0.0204754	0.0149005	0.0288186	0.0411923	0.0483145	0.0411923	0.0483145	0.116725	0.00971083	0.102283	0.0252166	-0.00286096	0.0515836	0.00990898
33	0.0727741	-0.0530839	-0.047889	-0.0745996	0.0112415	0.0727741	-0.0141089	-0.00899376	-0.0528017	-0.00988416	-0.052803	-0.00799806	-0.00606914	0.00918987	0.212588	0.201764	-0.0288276	0.0288186	0.0438245	0.0522082	0.0727741	-0.0530839	-0.0188928	-0.0745996	0.0112415	0.0727741	-0.0141089	-0.0528017	-0.00988416	-0.052803	-0.00799806	-0.00606914	0.00918987	0.2973	0.205686	0.00467158	0.0332086	0.0205329	0.0438245	0.0522082	0.0438245	0.0522082	0.113793	0.00646045	0.0355979	0.0158648	0.0234807	0.0102425	0.00628466
34	0.0290493	-0.0605531	-0.0188928	0.0637752	0.0645109	0.0290493	0.0100259	0.0078354	-0.0412028	0.014444	0.0360244	0.00306245	0.0257651	0.043307	0.122168	0.203285	0.0571847	0.0205329	0.0782067	0.0669284	0.0290493	-0.0605531	0.01975	0.0637752	0.0645109	0.0290493	0.0100259	-0.0412028	0.014444	0.0360244	0.00306245	0.0257651	0.043307	0.314029	0.30123	-0.016114	0.0773906	0.0373734	0.0782067	0.0669284	0.0782067	0.0669284	0.119687	0.0184734	-0.086033	0.0290922	0.0494796	-0.00799393	0.0161641
35	-0.0124599	0.0352122	0.01975	0.0240603	0.0289985	-0.0124599	-0.00497471	0.0157454	-0.0828882	-0.0122191	0.00770676	0.0213692	0.0411432	0.0486427	0.205686	0.206343	0.00309824	0.0373734	0.0430185	0.0650024	-0.0124599	0.0352122	0.0104596	0.0240603	0.0289985	-0.0124599	-0.00497471	-0.0828882	-0.0122191	0.00770676	0.0213692	0.0411432	0.0486427	0.353389	0.287426	-0.0220164	0.0524322	0.0857413	0.0430185	0.0650024	0.0430185	0.0650024	0.179172	0.0168344	-0.00741639	0.00169178	-0.0984752	0.0204868	0.0152909
36	0.0244411	0.0253756	0.0104596	0.0181999	-0.00033963	0.0244411	0.0542702	-0.0132742	0.135968	0.0173406	0.0623089	0.00537594	0.0138024	0.0346035	0.30123	0.175105	0.0489977	0.0857413	0.073245	0.0734778	0.0244411	0.0253756	0.0427463	0.0181999	-0.00033963	0.0244411	0.0542702	0.135968	0.0173406	0.0623089	0.00537594	0.0138024	0.0346035	0.423287	0.2973	-0.00399915	0.051281	0.0270959	0.073245	0.0734778	0.073245	0.0734778	0.189324	0.0227951	-0.0885733	-0.0500481	-0.0574458	-0.00365656	0.0193397
37	0.0392184	-0.0542206	0.0427463	0.0469332	-0.00594533	0.0392184	0.07619	-0.025568	-0.011106	0.0194392	0.019558	-0.0219097	0.0237549	-0.0232648	0.287426	0.123248	0.0305771	0.0270959	0.0676055	0.0658087	0.0392184	-0.0542206	0.0707675	0.0469332	-0.00594533	0.0392184	0.07619	-0.011106	0.0194392	0.019558	-0.0219097	0.0237549	-0.0232648	0.479668	0.314029	-0.00445659	0.0940226	0.0851687	0.0676055	0.0658087	0.0676055	0.0658087	0.248849	0.0197016	0.00864971	0.0231585	0.0263887	0.0064458	0.018212
38	0.0570501	0.183372	0.0707675	0.0455902	0.00574965	0.0570501	0.0985144	-0.00115695	-0.0263235	0.0328185	0.111483	0.0382613	0.0850016	-0.0314306	0.2973	0.163025	0.109339	0.0851687	0.0682554	0.0728116	0.0570501	0.183372	0.105407	0.0455902	0.00574965	0.0570501	0.0985144	-0.0263235	0.0328185	0.111483	0.0382613	0.0850016	-0.0314306	0.555945	0.353389	0.010394	0.0345446	0.0854134	0.0682554	0.0728116	0.0682554	0.0728116	0.301971	0.0390996	-0.0558448	0.03711	0.0299494	0.0428913	0.0366112
39	0.0726492	0.113995	0.105407	0.039127	-0.0256086	0.0726492	0.0234114	-0.00820027	0.0581907	0.0535008	0.0416052	-0.00787634	0.0526626	-0.00597082	0.314029	0.137089	0.128993	0.0854134	0.0695948	0.088027	0.0726492	0.113995	0.310237	0.039127	-0.0256086	0.0726492	0.0234114	0.0581907	0.0535008	0.0416052	-0.00787634	0.0526626	-0.00597082	0.64382	0.423287	0.0325991	0.0314446	0.0551486	0.0695948	0.088027	0.0695948	0.088027	0.386336	0.0383596	-0.000549028	-0.0215663	0.0358644	0.0453732	0.0364233
40	0.0335569	0.123693	0.310237	0.0126925	0.0285999	0.0335569	-0.0477704	0.00223725	0.093883	-0.00685628	-0.00704133	0.0643068	0.0694354	-0.0234096	0.353389	0.507273	0.289239	0.0551486	0.0789404	0.1434	0.0335569	0.123693	0.539075	0.0126925	0.0285999	0.0335569	-0.0477704	0.093883	-0.00685628	-0.00704133	0.0643068	0.0694354	-0.0234096	0.701781	0.479668	0.0951152	0.0835534	0.0736579	0.0789404	0.1434	0.0789404	0.1434	0.567872	0.0496691	0.0660491	0.221931	0.295202	0.0709714	0.0525814
41	-0.0589409	0.0179381	0.539075	0.145946	0.0206514	-0.0589409	0.105931	-0.0188973	0.369655	0.024772	0.0362313	0.0201415	0.0875183	0.00541003	0.423287	0.917385	0.675159	0.0736579	0.102032	0.240205	-0.0589409	0.0179381	0.838102	0.145946	0.0206514	-0.0589409	0.105931	0.369655	0.024772	0.0362313	0.0201415	0.0875183	0.00541003	0.859032	0.555945	0.180645	0.137772	0.0579382	0.102032	0.240205	0.102032	0.240205	0.791699	0.0908304	4.82344	2.49216	2.2132	1.27033	0.167184
42	0.103557	0.264261	0.838102	0.202968	0.135764	0.103557	0.158317	0.0166071	0.772525	0.036937	0.108631	0.0930856	0.182068	0.0869262	0.479668	1.44749	1.1933	0.0579382	0.154078	0.361957	0.103557	0.264261	0.918631	0.202968	0.135764	0.103557	0.158317	0.772525	0.036937	0.108631	0.0930856	0.182068	0.0869262	0.913682	0.64382	0.253901	0.159409	0.155433	0.154078	0.361957	0.154078	0.361957	1.01939	0.142359	5.37439	4.00264	2.51324	1.89511	0.246414
43	0.485959	0.361718	0.918631	0.211515	0.293096	0.485959	0.329698	0.141179	0.851003	0.0788651	0.28622	0.263346	0.261464	0.185946	0.555945	1.7676	2.08587	0.155433	0.205509	0.492365	0.485959	0.361718	1.01558	0.211515	0.293096	0.485959	0.329698	0.851003	0.0788651	0.28622	0.263346	0.261464	0.185946	1.08407	0.701781	0.357099	0.23587	0.479537	0.205509	0.492365	0.205509	0.492365	1.17413	0.214445	5.52994	4.48393	2.60043	2.00002	0.335502
44	1.27525	0.519867	1.01558	0.387236	0.866991	1.27525	0.760317	0.2171	1.3025	0.238169	0.615539	0.43011	0.477742	0.551055	0.64382	1.87551	3.03482	0.479537	0.313321	0.741303	1.27525	0.519867	1.12816	0.387236	0.866991	1.27525	0.760317	1.3025	0.238169	0.615539	0.43011	0.477742	0.551055	1.13024	0.859032	0.488122	0.284887	1.74226	0.313321	0.741303	0.313321	0.741303	1.35755	0.351939	5.77685	4.88204	2.60993	1.97478	0.476765
45	1.764	0.793194	1.12816	0.608954	1.37889	1.764	1.32137	0.285978	1.56871	0.447645	1.05352	0.617516	0.73692	0.951176	0.701781	1.89333	4.04646	1.74226	0.519402	1.02973	1.764	0.793194	1.28001	0.608954	1.37889	1.764	1.32137	1.56871	0.447645	1.05352	0.617516	0.73692	0.951176	1.23393	0.913682	0.565153	0.397766	3.78556	0.519402	1.02973	0.519402	1.02973	1.50496	0.491666	5.49292	4.84671	2.58607	1.97292	0.609477
46	2.00805	1.00467	1.28001	0.891199	1.6982	2.00805	2.08634	0.402791	1.81527	0.696606	1.55651	0.782661	1.02329	1.2663	0.859032	1.8409	4.78432	3.78556	0.674069	1.35489	2.00805	1.00467	1.5842	0.891199	1.6982	2.00805	2.08634	1.81527	0.696606	1.55651	0.782661	1.02329	1.2663	1.45557	1.08407	0.655404	0.401014	5.2178	0.674069	1.35489	0.674069	1.35489	1.70814	0.627577	5.54231	4.79288	2.58058	2.01278	0.739558
47	2.06759	1.29512	1.5842	1.09285	1.89815	2.06759	2.55281	0.403021	1.73709	0.900924	1.92782	0.89108	1.20037	1.41921	0.913682	1.86878	5.37614	5.2178	0.923821	1.70183	2.06759	1.29512	1.60696	1.09285	1.89815	2.06759	2.55281	1.73709	0.900924	1.92782	0.89108	1.20037	1.41921	1.73396	1.13024	0.70801	0.453736	5.98877	0.923821	1.70183	0.923821	1.70183	1.82648	0.71988	5.24162	4.99167	2.5537	2.02236	0.82649
48	2.16524	1.48715	1.60696	1.31494	1.92278	2.16524	2.97524	0.434558	1.92242	1.07671	2.36171	1.03235	1.34768	1.53765	1.08407	1.90042	5.39915	5.98877	1.1016	2.01327	2.16524	1.48715	1.87274	1.31494	1.92278	2.16524	2.97524	1.92242	1.07671	2.36171	1.03235	1.34768	1.53765	2.11659	1.23393	0.741639	0.481356	6.14461	1.1016	2.01327	1.1016	2.01327	1.93984	0.79166	5.32346	4.85734	2.54903	1.93318	0.893298
49	2.1572	1.61662	1.87274	1.54016	1.96245	2.1572	3.2046	0.421314	2.01673	1.2462	2.58366	1.06847	1.50236	1.64268	1.13024	1.84086	5.59532	6.14461	1.35716	2.16962	2.1572	1.61662	2.17795	1.54016	1.96245	2.1572	3.2046	2.01673	1.2462	2.58366	1.06847	1.50236	1.64268	2.42634	1.45557	0.809317	0.502807	6.11082	1.35716	2.16962	1.35716	2.16962	2.01889	0.842716	5.2512	4.91513	2.5374	1.90887	0.941539
50	2.14698	1.90086	2.17795	1.64489	2.01283	2.14698	3.32539	0.462544	2.01079	1.3246	2.71152	1.14141	1.6511	1.73642	1.23393	1.79907	5.44756	6.11082	1.35528	2.24004	2.14698	1.90086	2.34227	1.64489	2.01283	2.14698	3.32539	2.01079	1.3246	2.71152	1.14141	1.6511	1.73642	2.67621	1.73396	0.773979	0.554657	6.02103	1.35528	2.24004	1.35528	2.24004	2.12899	0.866928	5.42389	4.82891	2.62509	2.01432	0.967078
51	2.13882	2.06844	2.34227	1.68645	1.99592	2.13882	3.44761	0.449707	2.1368	1.388	2.88951	1.2129	1.78755	1.89197	1.45557	1.77868	5.75116	6.02103	1.40636	2.31197	2.13882	2.06844	2.55939	1.68645	1.99592	2.13882	3.44761	2.1368	1.388	2.88951	1.2129	1.78755	1.89197	2.78954	2.11659	0.824189	0.499102	5.9895	1.40636	2.31197	1.40636	2.31197	2.19541	0.900682	5.25558	4.87146	2.57743	1.95964	0.998945
52	2.16685	2.09995	2.55939	1.81118	1.99135	2.16685	3.44711	0.466331	2.27972	1.44534	2.96844	1.22281	1.847	1.91852	1.73396	1.72643	5.83894	5.9895	1.41016	2.32535	2.16685	2.09995	2.898	1.81118	1.99135	2.16685	3.44711	2.27972	1.44534	2.96844	1.22281	1.847	1.91852	2.80354	2.42634	0.854468	0.556519	5.89482	1.41016	2.32535	1.41016	2.32535	2.29207	0.927666	5.36903	4.97425	2.59411	1.91897	1.02503
53	2.16295	2.27199	2.898	1.82316	2.00505	2.16295	3.4842	0.485358	2.23535	1.48359	3.10122	1.27602	1.92548	2.03613	2.11659	1.76466	6.16798	5.89482	1.46107	2.33153	2.16295	2.27199	2.97832	1.82316	2.00505	2.16295	3.4842	2.23535	1.48359	3.10122	1.27602	1.92548	2.03613	3.01856	2.67621	0.827978	0.557156	5.96031	1.46107	2.33153	1.46107	2.33153	2.33424	0.958261	5.00485	4.88946	2.61342	1.9887	1.0529
54	1.99676	2.31675	2.97832	1.91029	1.96869	1.99676	3.48615	0.453498	2.37807	1.50788	3.14803	1.28727	2.02949	2.10557	2.42634	1.72387	6.61484	5.96031	1.41125	2.32711	1.99676	2.31675	3.17909	1.91029	1.96869	1.99676	3.48615	2.37807	1.50788	3.14803	1.28727	2.02949	2.10557	3.03054	2.78954	0.851482	0.537072	5.99779	1.41125	2.32711	1.41125	2.32711	2.42425	0.983798	5.10651	4.8687	2.56799	1.98866	1.07934
55	1.98332	2.41665	3.17909	1.97329	2.00985	1.98332	3.49032	0.48576	2.27356	1.5049	3.20964	1.33873	2.13628	2.18835	2.67621	1.62391	7.13826	5.99779	1.39502	2.26831	1.98332	2.41665	3.19554	1.97329	2.00985	1.98332	3.49032	2.27356	1.5049	3.20964	1.33873	2.13628	2.18835	3.0549	2.80354	0.881767	0.600677	5.97873	1.39502	2.26831	1.39502	2.26831	2.49734	1.00476	5.15277	4.87686	2.52984	2.00247	1.09847
56	1.97964	2.40924	3.19554	1.9008	1.96901	1.97964	3.49032	0.440862	2.38712	1.56629	3.37857	1.3522	2.16889	2.27451	2.78954	1.60937	7.51169	5.97873	1.40636	2.30649	1.97964	2.40924	3.24266	1.9008	1.96901	1.97964	3.49032	2.38712	1.56629	3.37857	1.3522	2.16889	2.27451	3.26891	3.01856	0.941205	0.595517	5.91366	1.40636	2.30649	1.40636	2.30649	2.48074	1.0203	5.08303	4.97377	2.48613	1.92013	1.11445
57	1.89086	2.34966	3.24266	2.01891	1.97362	1.89086	3.49032	0.449702	2.55447	1.50292	3.44689	1.361	2.26162	2.38042	2.80354	1.59248	7.97099	5.91366	1.38511	2.25336	1.89086	2.34966	3.3309	2.01891	1.97362	1.89086	3.49032	2.55447	1.50292	3.44689	1.361	2.26162	2.38042	3.10241	3.03054	1.01359	0.634961	5.84575	1.38511	2.25336	1.38511	2.25336	2.55666	1.04267	5.26924	4.77076	2.54981	1.94777	1.14317
58	1.82738	2.39937	3.3309	1.94538	1.93888	1.82738	3.49032	0.437786	2.44481	1.50452	3.51338	1.36261	2.29821	2.41623	3.01856	1.59945	8.08545	5.84575	1.37204	2.30576	1.82738	2.39937	3.41328	1.94538	1.93888	1.82738	3.49032	2.44481	1.50452	3.51338	1.36261	2.29821	2.41623	3.05116	3.0549	1.09712	0.648672	5.79746	1.37204	2.30576	1.37204	2.30576	2.58742	1.0584	5.27196	4.77449	2.57912	1.97259	1.17046
59	1.78221	2.25766	3.41328	1.91129	1.91241	1.78221	3.49032	0.427799	2.4977	1.47028	3.60218	1.38873	2.2966	2.47633	3.03054	1.56389	8.33499	5.79746	1.40185	2.28291	1.78221	2.25766	3.4572	1.91129	1.91241	1.78221	3.49032	2.4977	1.47028	3.60218	1.38873	2.2966	2.47633	3.14244	3.26891	1.20213	0.65325	5.7877	1.40185	2.28291	1.40185	2.28291	2.59402	1.07314	5.19836	4.81192	2.54473	1.96949	1.19385
60	1.62533	2.17488	3.4572	1.82693	1.87677	1.62533	3.48081	0.4045	2.57495	1.50583	3.79634	1.40373	2.29762	2.48382	3.0549	1.55625	8.39292	5.7877	1.44081	2.26992	1.62533	2.17488	3.48252	1.82693	1.87677	1.62533	3.48081	2.57495	1.50583	3.79634	1.40373	2.29762	2.48382	3.07005	3.10241	1.21629	0.741183	5.72927	1.44081	2.26992	1.44081	2.26992	2.60639	1.08202	5.13355	4.63934	2.61282	1.95563	1.20489
61	1.5762	2.23725	3.48252	1.73767	1.84516	1.5762	3.47343	0.374697	2.73949	1.4817	3.89696	1.41546	2.3758	2.5551	3.26891	1.52431	8.55487	5.72927	1.47578	2.27422	1.5762	2.23725	3.58373	1.73767	1.84516	1.5762	3.47343	2.73949	1.4817	3.89696	1.41546	2.3758	2.5551	3.20448	3.05116	1.22841	0.689514	5.6113	1.47578	2.27422	1.47578	2.27422	2.66827	1.0928	5.14222	4.83447	2.54982	2.02418	1.22142
62	1.46521	2.12247	3.58373	1.68939	1.87861	1.46521	3.48626	0.364946	2.67205	1.48527	4.00265	1.43745	2.38258	2.55079	3.10241	1.49855	8.41136	5.6113	1.48126	2.31086	1.46521	2.12247	3.63519	1.68939	1.87861	1.46521	3.48626	2.67205	1.48527	4.00265	1.43745	2.38258	2.55079	3.02091	3.14244	1.27253	0.682008	5.44413	1.48126	2.31086	1.48126	2.31086	2.66575	1.09951	5.06677	4.80016	2.56529	1.98408	1.23213
63	1.30886	2.13072	3.63519	1.50395	1.68413	1.30886	3.43214	0.278925	2.57969	1.49227	4.17	1.42552	2.39645	2.52241	3.05116	1.4759	8.51868	5.44413	1.50873	2.35608	1.30886	2.13072	3.5922	1.50395	1.68413	1.30886	3.43214	2.57969	1.49227	4.17	1.42552	2.39645	2.52241	2.85872	3.07005	1.22832	0.667208	5.3051	1.50873	2.35608	1.50873	2.35608	2.6713	1.09643	4.91588	4.89369	2.53347	1.93756	1.2285
64	1.19007	2.14769	3.5922	1.44152	1.70959	1.19007	3.44208	0.214749	2.77236	1.53848	4.42885	1.44726	2.39809	2.53167	3.14244	1.44986	8.81977	5.3051	1.50325	2.31921	1.19007	2.14769	3.56738	1.44152	1.70959	1.19007	3.44208	2.77236	1.53848	4.42885	1.44726	2.39809	2.53167	2.84832	3.20448	1.28021	0.66688	5.27429	1.50325	2.31921	1.50325	2.31921	2.67159	1.11232	4.90894	4.7589	2.53287	1.94709	1.24317
65	1.03257	2.09059	3.56738	1.32634	1.59009	1.03257	3.40355	0.195863	2.64087	1.45253	4.48721	1.44021	2.44406	2.54612	3.07005	1.39499	8.60081	5.27429	1.53235	2.33198	1.03257	2.09059	3.58251	1.32634	1.59009	1.03257	3.40355	2.64087	1.45253	4.48721	1.44021	2.44406	2.54612	2.94794	3.02091	1.26493	0.664796	5.25813	1.53235	2.33198	1.53235	2.33198	2.73102	1.09901	4.90617	4.81416	2.54475	1.93231	1.23185
66	0.923984	2.01949	3.58251	1.25386	1.54752	0.923984	3.38772	0.144925	2.79107	1.45792	4.60181	1.39227	2.48718	2.60744	3.20448	1.37357	8.7594	5.25813	1.54506	2.33921	0.923984	2.01949	3.58663	1.25386	1.54752	0.923984	3.38772	2.79107	1.45792	4.60181	1.39227	2.48718	2.60744	2.96276	2.85872	1.2577	0.625265	5.15126	1.54506	2.33921	1.54506	2.33921	2.73871	1.10381	4.77048	4.76395	2.53167	1.92611	1.23647
67	0.768143	2.1495	3.58663	1.10195	1.51817	0.768143	3.36763	0.135624	2.67712	1.38569	4.66571	1.42126	2.51303	2.6144	3.02091	1.41749	8.72594	5.15126	1.48491	2.36098	0.768143	2.1495	3.61474	1.10195	1.51817	0.768143	3.36763	2.67712	1.38569	4.66571	1.42126	2.51303	2.6144	2.83207	2.84832	1.23361	0.630314	5.00296	1.48491	2.36098	1.48491	2.36098	2.73989	1.09061	4.8004	4.97658	2.5535	1.94449	1.22776
68	0.723413	2.18442	3.61474	0.998723	1.48193	0.723413	3.39077	0.113055	2.60897	1.38907	4.82448	1.43516	2.46457	2.57335	2.85872	1.35033	8.82287	5.00296	1.48091	2.35919	0.723413	2.18442	3.58972	0.998723	1.48193	0.723413	3.39077	2.60897	1.38907	4.82448	1.43516	2.46457	2.57335	2.81922	2.94794	1.25642	0.581923	4.99	1.48091	2.35919	1.48091	2.35919	2.78905	1.0931	5.18618	4.71689	2.61186	1.93674	1.23082
69	0.633913	2.00314	3.58972	1.01847	1.43005	0.633913	3.35309	0.0389952	2.56444	1.39886	4.95	1.38379	2.44979	2.57866	2.84832	1.37384	8.74675	4.99	1.48398	2.33884	0.633913	2.00314	3.61136	1.01847	1.43005	0.633913	3.35309	2.56444	1.39886	4.95	1.38379	2.44979	2.57866	2.91337	2.96276	1.18237	0.601909	4.76301	1.48398	2.33884	1.48398	2.33884	2.80627	1.07938	5.08386	4.78109	2.56879	1.95687	1.21777
70	0.603021	2.18734	3.61136	0.869976	1.39824	0.603021	3.36613	0.0248305	2.55183	1.35366	4.97354	1.40463	2.50441	2.5905	2.94794	1.31599	8.82462	4.76301	1.52567	2.32609	0.603021	2.18734	3.59666	0.869976	1.39824	0.603021	3.36613	2.55183	1.35366	4.97354	1.40463	2.50441	2.5905	2.88581	2.83207	1.16209	0.577642	4.71727	1.52567	2.32609	1.52567	2.32609	2.85303	1.07911	5.00527	4.74623	2.52455	1.9367	1.21531
71	0.549434	2.15609	3.59666	0.879114	1.36833	0.549434	3.31275	-0.0155762	2.42317	1.31899	5.02124	1.36643	2.55348	2.63334	2.96276	1.36218	8.74222	4.71727	1.50754	2.34766	0.549434	2.15609	3.57269	0.879114	1.36833	0.549434	3.31275	2.42317	1.31899	5.02124	1.36643	2.55348	2.63334	2.86543	2.81922	1.17173	0.569018	4.6756	1.50754	2.34766	1.50754	2.34766	2.8215	1.07867	4.84322	4.8017	2.57076	1.91059	1.21552
72	0.446336	2.02841	3.57269	0.821135	1.34829	0.446336	3.31955	0.00840827	2.42652	1.31501	5.12058	1.33514	2.48135	2.62721	2.83207	1.39669	8.90497	4.6756	1.51563	2.33216	0.446336	2.02841	3.59203	0.821135	1.34829	0.446336	3.31955	2.42652	1.31501	5.12058	1.33514	2.48135	2.62721	2.77727	2.91337	1.13081	0.552688	4.48722	1.51563	2.33216	1.51563	2.33216	2.82151	1.07135	4.99928	4.70705	2.5135	1.9592	1.20773
73	0.406246	2.04296	3.59203	0.686027	1.32024	0.406246	3.30544	-0.0220267	2.30127	1.3069	5.13134	1.34323	2.50253	2.61685	2.81922	1.35955	8.70209	4.48722	1.52419	2.31258	0.406246	2.04296	3.56656	0.686027	1.32024	0.406246	3.30544	2.30127	1.3069	5.13134	1.34323	2.50253	2.61685	2.9058	2.88581	1.14363	0.572588	4.60268	1.52419	2.31258	1.52419	2.31258	2.76152	1.06244	5.00308	4.7652	2.52993	2.00422	1.20135
74	0.35832	2.1243	3.56656	0.631497	1.1652	0.35832	3.26724	-0.0526774	2.33405	1.24953	5.16319	1.34251	2.475	2.61138	2.91337	1.26419	8.73883	4.60268	1.50115	2.36519	0.35832	2.1243	3.57465	0.631497	1.1652	0.35832	3.26724	2.33405	1.24953	5.16319	1.34251	2.475	2.61138	2.84108	2.86543	1.10953	0.51298	4.44148	1.50115	2.36519	1.50115	2.36519	2.84603	1.05224	4.86858	4.73956	2.55424	1.94668	1.1894
75	0.247335	2.09257	3.57465	0.623223	1.22716	0.247335	3.27608	-0.0276935	2.41742	1.24621	5.23088	1.3647	2.53119	2.59907	2.88581	1.27471	8.78159	4.44148	1.49445	2.30964	0.247335	2.09257	3.54762	0.623223	1.22716	0.247335	3.27608	2.41742	1.24621	5.23088	1.3647	2.53119	2.59907	2.70272	2.77727	1.10297	0.534412	4.30138	1.49445	2.30964	1.49445	2.30964	2.80719	1.04669	4.75385	4.86875	2.59885	1.93526	1.18578
76	0.240909	2.08085	3.54762	0.606825	1.16122	0.240909	3.22395	-0.0778276	2.3342	1.20776	5.26073	1.3059	2.4709	2.5737	2.86543	1.30212	8.53192	4.30138	1.42257	2.31703	0.240909	2.08085	3.50125	0.606825	1.16122	0.240909	3.22395	2.3342	1.20776	5.26073	1.3059	2.4709	2.5737	2.81303	2.9058	1.05204	0.515312	4.20069	1.42257	2.31703	1.42257	2.31703	2.81243	1.03113	4.88394	4.74095	2.55676	1.95847	1.17353
77	0.187272	2.10576	3.50125	0.451348	1.14558	0.187272	3.24371	-0.064447	2.30305	1.18578	5.33938	1.33647	2.49072	2.56333	2.77727	1.28109	8.62713	4.20069	1.4616	2.29813	0.187272	2.10576	3.46226	0.451348	1.14558	0.187272	3.24371	2.30305	1.18578	5.33938	1.33647	2.49072	2.56333	2.80848	2.84108	1.05508	0.510666	4.23431	1.4616	2.29813	1.4616	2.29813	2.77614	1.03868	4.99858	4.76577	2.53871	1.94084	1.17803
78	0.178729	1.9754	3.46226	0.460167	1.13098	0.178729	3.17824	-0.128305	2.25251	1.1473	5.31922	1.26963	2.46088	2.55488	2.9058	1.28671	8.54117	4.23431	1.46623	2.34822	0.178729	1.9754	3.53351	0.460167	1.13098	0.178729	3.17824	2.25251	1.1473	5.31922	1.26963	2.46088	2.55488	2.75713	2.70272	1.05691	0.479617	4.1045	1.46623	2.34822	1.46623	2.34822	2.80355	1.01503	4.95408	4.90398	2.56429	1.97281	1.16107
79	0.118226	2.08031	3.53351	0.363328	1.15769	0.118226	3.25327	-0.110438	2.19005	1.1315	5.40378	1.29926	2.45643	2.59841	2.84108	1.27044	8.40799	4.1045	1.43848	2.30964	0.118226	2.08031	3.50407	0.363328	1.15769	0.118226	3.25327	2.19005	1.1315	5.40378	1.29926	2.45643	2.59841	2.88427	2.81303	1.05095	0.477768	4.03489	1.43848	2.30964	1.43848	2.30964	2.78632	1.01106	4.98696	4.7876	2.57123	1.97385	1.15421
80	0.0648133	1.9608	3.50407	0.339317	1.09515	0.0648133	3.17087	-0.125444	2.09329	1.09887	5.41447	1.26549	2.39957	2.58651	2.70272	1.26931	8.30234	4.03489	1.46114	2.28083	0.0648133	1.9608	3.50815	0.339317	1.09515	0.0648133	3.17087	2.09329	1.09887	5.41447	1.26549	2.39957	2.58651	2.77564	2.80848	1.03855	0.484548	3.86554	1.46114	2.28083	1.46114	2.28083	2.80332	0.997224	4.58559	4.7512	2.5498	1.91003	1.13612
81	0.018182	2.0741	3.50815	0.305805	1.08462	0.018182	3.12728	-0.157765	2.14649	1.078	5.44593	1.27717	2.45247	2.54198	2.81303	1.2497	8.48624	3.86554	1.46738	2.34182	0.018182	2.0741	3.40198	0.305805	1.08462	0.018182	3.12728	2.14649	1.078	5.44593	1.27717	2.45247	2.54198	2.69706	2.75713	1.01845	0.441269	3.74174	1.46738	2.34182	1.46738	2.34182	2.87488	1.00328	4.58948	4.69872	2.58832	1.91287	1.14367
82	0.0190038	2.052	3.40198	0.268344	1.01929	0.0190038	3.08281	-0.179281	2.19282	1.07228	5.43042	1.23866	2.44208	2.50107	2.80848	1.19188	8.40388	3.74174	1.42009	2.34579	0.0190038	2.052	3.49451	0.268344	1.01929	0.0190038	3.08281	2.19282	1.07228	5.43042	1.23866	2.44208	2.50107	2.56873	2.88427	0.990066	0.458779	3.84541	1.42009	2.34579	1.42009	2.34579	2.87081	0.994059	4.77953	4.75236	2.60877	1.95	1.13821
83	-0.0767483	1.89457	3.49451	0.177706	0.993127	-0.0767483	3.0767	-0.178978	1.9713	1.04346	5.50716	1.24609	2.39905	2.52347	2.75713	1.21554	8.29638	3.84541	1.40065	2.32465	-0.0767483	1.89457	3.44324	0.177706	0.993127	-0.0767483	3.0767	1.9713	1.04346	5.50716	1.24609	2.39905	2.52347	2.69783	2.77564	1.01364	0.408081	3.675	1.40065	2.32465	1.40065	2.32465	2.87839	0.972969	4.71157	4.85245	2.54804	1.90985	1.11782
84	-0.102517	2.0196	3.44324	0.172108	0.87586	-0.102517	3.07124	-0.227275	1.95134	1.03799	5.57702	1.23125	2.41796	2.49237	2.88427	1.27392	8.37336	3.675	1.42549	2.26773	-0.102517	2.0196	3.46717	0.172108	0.87586	-0.102517	3.07124	1.95134	1.03799	5.57702	1.23125	2.41796	2.49237	2.59787	2.69706	0.962147	0.409751	3.78248	1.42549	2.26773	1.42549	2.26773	2.86912	0.973725	4.46528	4.91913	2.53115	1.91777	1.1146
85	-0.077421	1.88887	3.46717	0.176909	0.934659	-0.077421	2.96197	-0.171249	2.01843	1.01121	5.51958	1.22259	2.40243	2.51091	2.77564	1.27632	8.24947	3.78248	1.34431	2.28852	-0.077421	1.88887	3.36135	0.176909	0.934659	-0.077421	2.96197	2.01843	1.01121	5.51958	1.22259	2.40243	2.51091	2.6299	2.56873	0.96176	0.387087	3.78893	1.34431	2.28852	1.34431	2.28852	2.8657	0.968023	4.81275	4.69687	2.55508	1.87984	1.11178
86	-0.169272	2.06383	3.36135	0.000994766	0.88912	-0.169272	2.85527	-0.240989	1.94757	0.940275	5.5002	1.20806	2.35278	2.45484	2.69706	1.23616	8.35516	3.78893	1.40683	2.29685	-0.169272	2.06383	3.30312	0.000994766	0.88912	-0.169272	2.85527	1.94757	0.940275	5.5002	1.20806	2.35278	2.45484	2.70061	2.69783	0.958623	0.412295	3.60922	1.40683	2.29685	1.40683	2.29685	2.86283	0.960465	4.7717	4.8087	2.55027	1.90786	1.10792
87	-0.179184	1.89764	3.30312	0.0336878	0.911051	-0.179184	2.7797	-0.254698	1.8205	0.941415	5.56662	1.1662	2.39927	2.44939	2.56873	1.2868	8.26927	3.60922	1.37914	2.30447	-0.179184	1.89764	3.34835	0.0336878	0.911051	-0.179184	2.7797	1.8205	0.941415	5.56662	1.1662	2.39927	2.44939	2.75407	2.59787	0.942197	0.395855	3.50056	1.37914	2.30447	1.37914	2.30447	2.8779	0.948659	4.60636	4.74077	2.53528	1.95336	1.09537
88	-0.207292	2.00963	3.34835	0.0156052	0.900342	-0.207292	2.86782	-0.27907	1.918	0.922231	5.6151	1.20524	2.37886	2.47409	2.69783	1.26037	8.30867	3.50056	1.32084	2.32659	-0.207292	2.00963	3.38706	0.0156052	0.900342	-0.207292	2.86782	1.918	0.922231	5.6151	1.20524	2.37886	2.47409	2.52644	2.6299	0.920608	0.382101	3.44897	1.32084	2.32659	1.32084	2.32659	2.8164	0.950613	4.48613	4.74117	2.61577	1.89051	1.09648
89	-0.245066	1.92579	3.38706	-0.0426458	0.850934	-0.245066	2.66859	-0.268265	1.84573	0.891939	5.53771	1.14904	2.3555	2.45014	2.59787	1.19648	8.21359	3.44897	1.31376	2.28937	-0.245066	1.92579	3.3553	-0.0426458	0.850934	-0.245066	2.66859	1.84573	0.891939	5.53771	1.14904	2.3555	2.45014	2.56978	2.70061	0.930398	0.35284	3.4	1.31376	2.28937	1.31376	2.28937	2.8161	0.927623	4.79399	4.85748	2.60084	1.91211	1.07977
90	-0.322554	1.8832	3.3553	-0.0374343	0.854092	-0.322554	2.65924	-0.295384	1.84938	0.869912	5.50271	1.14286	2.3408	2.46596	2.6299	1.20871	8.19592	3.4	1.31893	2.28966	-0.322554	1.8832	3.27517	-0.0374343	0.854092	-0.322554	2.65924	1.84938	0.869912	5.50271	1.14286	2.3408	2.46596	2.44086	2.75407	0.918209	0.298091	3.21294	1.31893	2.28966	1.31893	2.28966	2.84613	0.920416	4.63321	4.77554	2.50278	1.88752	1.06735
91	-0.265298	2.05117	3.27517	-0.0104302	0.82115	-0.265298	2.60933	-0.304073	1.78698	0.851516	5.62385	1.18962	2.35477	2.41758	2.70061	1.24085	8.14336	3.21294	1.31548	2.2597	-0.265298	2.05117	3.24037	-0.0104302	0.82115	-0.265298	2.60933	1.78698	0.851516	5.62385	1.18962	2.35477	2.41758	2.50261	2.52644	0.928591	0.279789	3.24052	1.31548	2.2597	1.31548	2.2597	2.89505	0.917912	4.63329	4.77778	2.5517	1.88462	1.06621
92	-0.330084	1.94437	3.24037	-0.076409	0.874059	-0.330084	2.43185	-0.274794	1.7502	0.80897	5.56301	1.15766	2.35698	2.4381	2.75407	1.27565	8.09395	3.24052	1.30485	2.29159	-0.330084	1.94437	3.26362	-0.076409	0.874059	-0.330084	2.43185	1.7502	0.80897	5.56301	1.15766	2.35698	2.4381	2.52956	2.56978	0.91063	0.284076	3.11185	1.30485	2.29159	1.30485	2.29159	2.90002	0.913025	4.59556	4.81632	2.47925	1.89604	1.06325
93	-0.404061	1.91426	3.26362	-0.153561	0.806068	-0.404061	2.38782	-0.292181	1.6654	0.774859	5.5527	1.15237	2.35905	2.37506	2.52644	1.23297	8.20561	3.11185	1.24388	2.29114	-0.404061	1.91426	3.155	-0.153561	0.806068	-0.404061	2.38782	1.6654	0.774859	5.5527	1.15237	2.35905	2.37506	2.46474	2.44086	0.854214	0.313558	3.16911	1.24388	2.29114	1.24388	2.29114	2.78764	0.888473	4.6065	4.83297	2.52697	1.85129	1.03924
94	-0.393584	1.86858	3.155	-0.19859	0.721649	-0.393584	2.43446	-0.321642	1.57458	0.781819	5.58067	1.12773	2.31356	2.4009	2.56978	1.30774	8.08688	3.16911	1.22493	2.31985	-0.393584	1.86858	3.04195	-0.19859	0.721649	-0.393584	2.43446	1.57458	0.781819	5.58067	1.12773	2.31356	2.4009	2.41713	2.50261	0.873303	0.283024	2.99207	1.22493	2.31985	1.22493	2.31985	2.85888	0.884305	4.58207	4.80492	2.54062	1.89507	1.03462
95	-0.4353	1.86771	3.04195	-0.184514	0.650425	-0.4353	2.34852	-0.353742	1.5403	0.745836	5.59888	1.09888	2.30946	2.3141	2.44086	1.24095	8.17573	2.99207	1.21048	2.30297	-0.4353	1.86771	3.0405	-0.184514	0.650425	-0.4353	2.34852	1.5403	0.745836	5.59888	1.09888	2.30946	2.3141	2.42687	2.52956	0.877423	0.257223	3.03937	1.21048	2.30297	1.21048	2.30297	2.88535	0.868217	4.40683	4.74796	2.50394	1.86455	1.0208
96	-0.469993	1.88824	3.0405	-0.2791	0.675465	-0.469993	2.2381	-0.371016	1.60131	0.697623	5.46418	1.08159	2.24737	2.27993	2.50261	1.2918	7.97305	3.03937	1.22702	2.22586	-0.469993	1.88824	3.03813	-0.2791	0.675465	-0.469993	2.2381	1.60131	0.697623	5.46418	1.08159	2.24737	2.27993	2.45304	2.46474	0.86426	0.223788	2.89488	1.22702	2.22586	1.22702	2.22586	2.90281	0.85158	4.48914	4.72581	2.47729	1.89006	1.00243
97	-0.439999	1.9829	3.03813	-0.245349	0.666407	-0.439999	2.22724	-0.332652	1.58395	0.702747	5.54563	1.10454	2.2963	2.32489	2.52956	1.29368	8.1405	2.89488	1.20554	2.24709	-0.439999	1.9829	3.0266	-0.245349	0.666407	-0.439999	2.22724	1.58395	0.702747	5.54563	1.10454	2.2963	2.32489	2.50678	2.41713	0.832726	0.210633	3.01242	1.20554	2.24709	1.20554	2.24709	2.83432	0.856731	4.55682	4.65502	2.52703	1.88492	1.00987
98	-0.478718	1.85744	3.0266	-0.286929	0.631729	-0.478718	2.13495	-0.372016	1.53367	0.660762	5.51724	1.07723	2.26748	2.27675	2.46474	1.28981	7.98314	3.01242	1.21316	2.29183	-0.478718	1.85744	2.98166	-0.286929	0.631729	-0.478718	2.13495	1.53367	0.660762	5.51724	1.07723	2.26748	2.27675	2.40174	2.42687	0.832452	0.214383	2.96394	1.21316	2.29183	1.21316	2.29183	2.88891	0.842456	4.58698	4.88627	2.51282	1.86997	0.995521
99	-0.461974	1.92394	2.98166	-0.291367	0.626777	-0.461974	2.08254	-0.367794	1.49677	0.667583	5.58024	1.08363	2.26213	2.26329	2.41713	1.26242	8.1549	2.96394	1.174	2.25575	-0.461974	1.92394	2.84496	-0.291367	0.626777	-0.461974	2.08254	1.49677	0.667583	5.58024	1.08363	2.26213	2.26329	2.60904	2.45304	0.817055	0.215849	2.76973	1.174	2.25575	1.174	2.25575	2.87584	0.840072	4.44473	4.80168	2.52498	1.84039	0.991393
100	-0.507915	1.927	2.84496	-0.324219	0.614627	-0.507915	2.062	-0.37898	1.46762	0.624733	5.51673	1.06531	2.23579	2.26609	2.42687	1.25344	7.99716	2.76973	1.16234	2.22227	-0.507915	1.927	2.81299	-0.324219	0.614627	-0.507915	2.062	1.46762	0.624733	5.51673	1.06531	2.23579	2.26609	2.3853	2.50678	0.802795	0.188154	2.88265	1.16234	2.22227	1.16234	2.22227	2.90318	0.819179	4.44599	4.82459	2.45785	1.85524	0.972755
101	-0.494408	1.97374	2.81299	-0.34939	0.58638	-0.494408	1.97384	-0.3869	1.39988	0.569876	5.49917	1.07643	2.21625	2.22135	2.45304	1.25719	8.17093	2.88265	1.13618	2.21778	-0.494408	1.97374	2.76613	-0.34939	0.58638	-0.494408	1.97384	1.39988	0.569876	5.49917	1.07643	2.21625	2.22135	2.3957	2.40174	0.787068	0.16684	2.84402	1.13618	2.21778	1.13618	2.21778	2.86343	0.81887	4.53797	4.74595	2.45326	1.89049	0.972911
102	-0.560772	2.03091	2.76613	-0.425781	0.585668	-0.560772	1.95887	-0.437362	1.42923	0.585986	5.53448	1.07357	2.23581	2.22858	2.50678	1.24523	8.01002	2.84402	1.10836	2.24858	-0.560772	2.03091	2.77038	-0.425781	0.585668	-0.560772	1.95887	1.42923	0.585986	5.53448	1.07357	2.23581	2.22858	2.51239	2.60904	0.769591	0.173392	2.66469	1.10836	2.24858	1.10836	2.24858	2.82185	0.810936	4.48965	4.65866	2.52545	1.87721	0.966223
103	-0.528844	2.0542	2.77038	-0.321545	0.59062	-0.528844	1.84771	-0.408705	1.39675	0.545174	5.50411	1.06785	2.24185	2.18666	2.40174	1.25754	8.00307	2.66469	1.08625	2.22711	-0.528844	2.0542	2.77768	-0.321545	0.59062	-0.528844	1.84771	1.39675	0.545174	5.50411	1.06785	2.24185	2.18666	2.40582	2.3853	0.768997	0.138664	2.76167	1.08625	2.22711	1.08625	2.22711	2.90824	0.810275	4.55665	4.68496	2.53856	1.86704	0.964223
104	-0.568434	1.95983	2.77768	-0.419283	0.582899	-0.568434	1.79618	-0.386248	1.33034	0.525893	5.39892	1.04916	2.14454	2.14981	2.60904	1.28472	8.01006	2.76167	1.06916	2.24431	-0.568434	1.95983	2.62124	-0.419283	0.582899	-0.568434	1.79618	1.33034	0.525893	5.39892	1.04916	2.14454	2.14981	2.34968	2.3957	0.776228	0.142462	2.62794	1.06916	2.24431	1.06916	2.24431	2.82737	0.79189	4.58507	4.7629	2.53627	1.88304	0.950413
105	-0.592086	1.98153	2.62124	-0.467088	0.513733	-0.592086	1.78201	-0.425319	1.29284	0.503881	5.46073	1.05587	2.14138	2.11514	2.3853	1.29796	7.97839	2.62794	1.04114	2.21253	-0.592086	1.98153	2.56957	-0.467088	0.513733	-0.592086	1.78201	1.29284	0.503881	5.46073	1.05587	2.14138	2.11514	2.30624	2.51239	0.749634	0.0953527	2.68285	1.04114	2.21253	1.04114	2.21253	2.91059	0.786056	4.25515	4.75588	2.51146	1.83287	0.94265
106	-0.647916	1.92463	2.56957	-0.474359	0.525418	-0.647916	1.68127	-0.445571	1.22866	0.488587	5.37422	1.0035	2.09156	2.11402	2.3957	1.20807	7.88027	2.68285	0.983983	2.18177	-0.647916	1.92463	2.69208	-0.474359	0.525418	-0.647916	1.68127	1.22866	0.488587	5.37422	1.0035	2.09156	2.11402	2.2596	2.40582	0.776343	0.0988539	2.6636	0.983983	2.18177	0.983983	2.18177	2.90085	0.768076	4.54447	4.68272	2.46164	1.8685	0.925207
107	-0.585453	1.9513	2.69208	-0.45992	0.513856	-0.585453	1.81343	-0.446247	1.26037	0.493783	5.43821	1.0168	2.13466	2.12352	2.51239	1.29632	8.00069	2.6636	0.995977	2.18456	-0.585453	1.9513	2.46888	-0.45992	0.513856	-0.585453	1.81343	1.26037	0.493783	5.43821	1.0168	2.13466	2.12352	2.37379	2.34968	0.753686	0.104213	2.50961	0.995977	2.18456	0.995977	2.18456	2.87882	0.778278	4.09132	4.55406	2.39541	1.85041	0.928982
108	-0.597864	1.90843	2.46888	-0.521368	0.496507	-0.597864	1.54579	-0.468841	1.19902	0.427521	5.28257	0.983411	2.11806	2.07436	2.40582	1.31774	7.92749	2.50961	1.00963	2.14451	-0.597864	1.90843	2.51687	-0.521368	0.496507	-0.597864	1.54579	1.19902	0.427521	5.28257	0.983411	2.11806	2.07436	2.40193	2.30624	0.715728	0.102172	2.52047	1.00963	2.14451	1.00963	2.14451	2.85253	0.748852	4.40804	4.53145	2.47036	1.86537	0.902095
109	-0.558772	1.97899	2.51687	-0.498848	0.488341	-0.558772	1.52531	-0.436593	1.22004	0.409631	5.33485	1.0107	2.08789	2.01973	2.34968	1.25913	8.06319	2.52047	1.01465	2.1869	-0.558772	1.97899	2.51985	-0.498848	0.488341	-0.558772	1.52531	1.22004	0.409631	5.33485	1.0107	2.08789	2.01973	2.30442	2.2596	0.720742	0.0624928	2.43727	1.01465	2.1869	1.01465	2.1869	2.85395	0.748299	4.27859	4.64786	2.54118	1.85295	0.9016
110	-0.626024	2.03469	2.51985	-0.442338	0.405477	-0.626024	1.52892	-0.492257	1.159	0.404893	5.36121	0.996531	2.10118	1.99718	2.30624	1.21889	7.78902	2.43727	0.925096	2.20322	-0.626024	2.03469	2.50588	-0.442338	0.405477	-0.626024	1.52892	1.159	0.404893	5.36121	0.996531	2.10118	1.99718	2.22637	2.37379	0.711832	0.051108	2.28629	0.925096	2.20322	0.925096	2.20322	2.88782	0.734432	4.26209	4.6417	2.4813	1.84373	0.888574
111	-0.644968	1.99861	2.50588	-0.499338	0.396295	-0.644968	1.47133	-0.483328	1.20344	0.399074	5.40617	0.998159	2.08157	2.03428	2.2596	1.33212	7.88249	2.28629	0.940961	2.20336	-0.644968	1.99861	2.26789	-0.499338	0.396295	-0.644968	1.47133	1.20344	0.399074	5.40617	0.998159	2.08157	2.03428	2.1816	2.40193	0.707786	0.0691059	2.35653	0.940961	2.20336	0.940961	2.20336	2.86578	0.737706	4.19184	4.58613	2.53466	1.8318	0.892839
112	-0.65425	2.00354	2.26789	-0.545652	0.400507	-0.65425	1.45982	-0.477334	1.20928	0.396788	5.33945	0.994097	2.09644	1.93824	2.37379	1.30609	7.71728	2.35653	0.913632	2.1821	-0.65425	2.00354	2.30396	-0.545652	0.400507	-0.65425	1.45982	1.20928	0.396788	5.33945	0.994097	2.09644	1.93824	2.0964	2.30442	0.661088	0.0333442	2.31276	0.913632	2.1821	0.913632	2.1821	2.88539	0.726047	4.20286	4.49513	2.4748	1.8432	0.87998
113	-0.710087	2.04352	2.30396	-0.56312	0.433876	-0.710087	1.42204	-0.519563	1.21149	0.352345	5.37913	0.977199	2.15388	2.01392	2.40193	1.28261	7.79067	2.31276	0.881286	2.1122	-0.710087	2.04352	2.17433	-0.56312	0.433876	-0.710087	1.42204	1.21149	0.352345	5.37913	0.977199	2.15388	2.01392	2.23692	2.22637	0.652362	0.00550791	2.17594	0.881286	2.1122	0.881286	2.1122	2.88507	0.715718	4.25823	4.59181	2.44108	1.89188	0.873866
114	-0.635919	1.9967	2.17433	-0.609343	0.439586	-0.635919	1.27527	-0.526875	1.14692	0.322037	5.26357	0.952855	2.06889	1.97448	2.30442	1.22363	7.85609	2.17594	0.847722	2.11481	-0.635919	1.9967	2.14224	-0.609343	0.439586	-0.635919	1.27527	1.14692	0.322037	5.26357	0.952855	2.06889	1.97448	2.0789	2.1816	0.6566	0.0186746	2.23035	0.847722	2.11481	0.847722	2.11481	2.84162	0.703575	4.19367	4.60359	2.39598	1.85387	0.858566
115	-0.671301	1.8783	2.14224	-0.64215	0.391041	-0.671301	1.26435	-0.518103	1.08821	0.308683	5.27096	0.940139	2.03268	1.98322	2.22637	1.30314	7.75033	2.23035	0.852802	2.15464	-0.671301	1.8783	2.0642	-0.64215	0.391041	-0.671301	1.26435	1.08821	0.308683	5.27096	0.940139	2.03268	1.98322	2.07258	2.0964	0.672191	-0.013073	2.19582	0.852802	2.15464	0.852802	2.15464	2.81894	0.692292	4.03513	4.70645	2.49014	1.88507	0.849206
116	-0.732792	2.13639	2.0642	-0.535502	0.335173	-0.732792	1.31665	-0.533649	1.08951	0.3124	5.3163	0.988732	2.01864	1.86361	2.1816	1.24693	7.68683	2.19582	0.849317	2.1374	-0.732792	2.13639	2.19534	-0.535502	0.335173	-0.732792	1.31665	1.08951	0.3124	5.3163	0.988732	2.01864	1.86361	2.14598	2.23692	0.635236	-0.0228488	2.2587	0.849317	2.1374	0.849317	2.1374	2.82272	0.694352	4.1987	4.60714	2.47395	1.87326	0.853246
117	-0.645442	2.03834	2.19534	-0.48022	0.300637	-0.645442	1.20551	-0.547588	1.09601	0.265673	5.21842	0.967567	2.03602	1.90102	2.0964	1.27603	7.7208	2.2587	0.861577	2.13851	-0.645442	2.03834	1.97045	-0.48022	0.300637	-0.645442	1.20551	1.09601	0.265673	5.21842	0.967567	2.03602	1.90102	2.16079	2.0789	0.640303	-0.0199769	2.2627	0.861577	2.13851	0.861577	2.13851	2.83209	0.686139	3.83137	4.5745	2.42119	1.85949	0.840435
118	-0.727288	2.03758	1.97045	-0.554585	0.316544	-0.727288	1.19592	-0.568403	0.990871	0.270245	5.32662	0.949646	1.97743	1.84743	2.23692	1.26189	7.64793	2.2627	0.765118	2.10304	-0.727288	2.03758	1.97606	-0.554585	0.316544	-0.727288	1.19592	0.990871	0.270245	5.32662	0.949646	1.97743	1.84743	2.22139	2.07258	0.638842	-0.0162834	2.06001	0.765118	2.10304	0.765118	2.10304	2.84426	0.673489	4.1975	4.63175	2.42784	1.83489	0.830583
119	-0.735781	1.97501	1.97606	-0.637575	0.33522	-0.735781	0.99538	-0.587657	1.00424	0.195038	5.1767	0.918491	1.91102	1.82406	2.0789	1.24722	7.7078	2.06001	0.752206	2.11844	-0.735781	1.97501	2.08368	-0.637575	0.33522	-0.735781	0.99538	1.00424	0.195038	5.1767	0.918491	1.91102	1.82406	2.22489	2.14598	0.621563	-0.02567	2.22026	0.752206	2.11844	0.752206	2.11844	2.85978	0.659473	4.0098	4.42133	2.40728	1.80767	0.81361
120	-0.753621	2.09337	2.08368	-0.576957	0.284616	-0.753621	1.08995	-0.578381	1.0634	0.23106	5.22848	0.930555	1.94015	1.7974	2.07258	1.33405	7.76164	2.22026	0.725472	2.10327	-0.753621	2.09337	1.90751	-0.576957	0.284616	-0.753621	1.08995	1.0634	0.23106	5.22848	0.930555	1.94015	1.7974	2.03882	2.16079	0.599446	-0.0295798	2.22209	0.725472	2.10327	0.725472	2.10327	2.84533	0.665859	4.12465	4.55672	2.48102	1.82775	0.821562
121	-0.745984	2.09492	1.90751	-0.581349	0.283886	-0.745984	0.961593	-0.567155	0.991743	0.187785	5.1052	0.909085	1.96144	1.86492	2.14598	1.32572	7.5396	2.22209	0.695942	2.05334	-0.745984	2.09492	1.78588	-0.581349	0.283886	-0.745984	0.961593	0.991743	0.187785	5.1052	0.909085	1.96144	1.86492	2.04659	2.22139	0.552468	-0.0654413	2.10327	0.695942	2.05334	0.695942	2.05334	2.87617	0.65599	4.17739	4.75583	2.42075	1.82807	0.818664
122	-0.729197	2.07645	1.78588	-0.622418	0.313518	-0.729197	1.01122	-0.557991	0.990355	0.188302	5.03359	0.901091	1.94034	1.76897	2.16079	1.2757	7.5489	2.10327	0.749078	2.03894	-0.729197	2.07645	1.79283	-0.622418	0.313518	-0.729197	1.01122	0.990355	0.188302	5.03359	0.901091	1.94034	1.76897	2.0779	2.22489	0.557164	-0.0801543	2.11418	0.749078	2.03894	0.749078	2.03894	2.86179	0.645925	3.97784	4.61788	2.43043	1.83346	0.803798
123	-0.735233	1.99106	1.79283	-0.661188	0.262573	-0.735233	0.958635	-0.618381	0.998232	0.169618	5.05717	0.857774	1.91479	1.78343	2.22139	1.31662	7.33721	2.11418	0.657013	2.03578	-0.735233	1.99106	1.85012	-0.661188	0.262573	-0.735233	0.958635	0.998232	0.169618	5.05717	0.857774	1.91479	1.78343	2.01787	2.03882	0.545725	-0.113393	2.07084	0.657013	2.03578	0.657013	2.03578	2.89394	0.628059	3.59178	4.60466	2.37277	1.86791	0.78425
124	-0.745618	1.9621	1.85012	-0.50637	0.200757	-0.745618	0.879632	-0.59519	0.979693	0.132508	5.07447	0.893194	1.9133	1.81392	2.22489	1.2749	7.43353	2.07084	0.673437	2.06131	-0.745618	1.9621	1.99866	-0.50637	0.200757	-0.745618	0.879632	0.979693	0.132508	5.07447	0.893194	1.9133	1.81392	2.17134	2.04659	0.555552	-0.0901911	2.00481	0.673437	2.06131	0.673437	2.06131	2.89734	0.631599	3.90248	4.51407	2.45177	1.84872	0.788511
125	-0.745096	1.86405	1.99866	-0.635152	0.215213	-0.745096	0.828912	-0.619419	0.869038	0.13302	5.0712	0.861518	1.83654	1.7404	2.03882	1.27909	7.34918	2.00481	0.626169	2.03529	-0.745096	1.86405	1.73589	-0.635152	0.215213	-0.745096	0.828912	0.869038	0.13302	5.0712	0.861518	1.83654	1.7404	2.07723	2.0779	0.576376	-0.131935	1.9915	0.626169	2.03529	0.626169	2.03529	2.86857	0.618298	3.84137	4.62716	2.51233	1.82151	0.777081
126	-0.788688	2.1187	1.73589	-0.674661	0.250166	-0.788688	0.878453	-0.601728	0.861881	0.122208	5.04374	0.866811	1.90508	1.715	2.04659	1.23323	7.27052	1.9915	0.630911	2.03787	-0.788688	2.1187	1.76389	-0.674661	0.250166	-0.788688	0.878453	0.861881	0.122208	5.04374	0.866811	1.90508	1.715	2.03355	2.01787	0.545326	-0.0854627	2.03369	0.630911	2.03787	0.630911	2.03787	2.88418	0.615286	3.76969	4.75194	2.33348	1.87751	0.774655
127	-0.787268	2.05437	1.76389	-0.613747	0.21324	-0.787268	0.791216	-0.624048	0.926891	0.110288	5.06162	0.862409	1.90557	1.70558	2.0779	1.27776	7.2268	2.03369	0.644548	2.03844	-0.787268	2.05437	1.61591	-0.613747	0.21324	-0.787268	0.791216	0.926891	0.110288	5.06162	0.862409	1.90557	1.70558	2.00162	2.17134	0.549051	-0.0883406	1.96604	0.644548	2.03844	0.644548	2.03844	2.88893	0.61982	3.77439	4.73724	2.41259	1.84754	0.776284
128	-0.774476	2.08268	1.61591	-0.61385	0.23738	-0.774476	0.765562	-0.623299	0.887198	0.0775101	5.03863	0.840644	1.90207	1.67213	2.01787	1.30022	7.36878	1.96604	0.556261	2.02267	-0.774476	2.08268	1.65621	-0.61385	0.23738	-0.774476	0.765562	0.887198	0.0775101	5.03863	0.840644	1.90207	1.67213	2.14972	2.07723	0.557497	-0.125717	1.95962	0.556261	2.02267	0.556261	2.02267	2.87594	0.6149	3.86981	4.65742	2.4714	1.86404	0.774882
129	-0.751438	2.04945	1.65621	-0.620472	0.248089	-0.751438	0.732904	-0.596934	0.798797	0.0852632	5.05982	0.863454	1.9515	1.78292	2.17134	1.38133	7.10971	1.95962	0.567402	2.03239	-0.751438	2.04945	1.65769	-0.620472	0.248089	-0.751438	0.732904	0.798797	0.0852632	5.05982	0.863454	1.9515	1.78292	2.17512	2.03355	0.52053	-0.122308	1.98953	0.567402	2.03239	0.567402	2.03239	2.92094	0.607216	3.53636	4.50695	2.44439	1.81972	0.761999
130	-0.803449	1.96293	1.65769	-0.638418	0.182451	-0.803449	0.747593	-0.598941	0.911519	0.082766	5.08879	0.852045	1.81269	1.74301	2.07723	1.31893	7.10008	1.98953	0.59509	2.04275	-0.803449	1.96293	1.61261	-0.638418	0.182451	-0.803449	0.747593	0.911519	0.082766	5.08879	0.852045	1.81269	1.74301	2.00373	2.00162	0.528672	-0.103698	1.90669	0.59509	2.04275	0.59509	2.04275	2.88756	0.603736	3.57743	4.69038	2.44819	1.80518	0.761988
131	-0.764812	1.9657	1.61261	-0.629985	0.239068	-0.764812	0.682111	-0.633946	0.853945	0.0608769	5.04147	0.811219	1.85164	1.66477	2.03355	1.33751	7.1711	1.90669	0.552464	1.98762	-0.764812	1.9657	1.67162	-0.629985	0.239068	-0.764812	0.682111	0.853945	0.0608769	5.04147	0.811219	1.85164	1.66477	2.03001	2.14972	0.50776	-0.126094	1.97701	0.552464	1.98762	0.552464	1.98762	2.84193	0.595564	3.66763	4.6062	2.42619	1.80776	0.752334
132	-0.771554	2.03171	1.67162	-0.639852	0.193776	-0.771554	0.606366	-0.647523	0.900586	0.0292768	4.96	0.829672	1.86224	1.60594	2.00162	1.38434	7.17694	1.97701	0.55317	2.02051	-0.771554	2.03171	1.59501	-0.639852	0.193776	-0.771554	0.606366	0.900586	0.0292768	4.96	0.829672	1.86224	1.60594	2.03293	2.17512	0.500169	-0.14819	1.99213	0.55317	2.02051	0.55317	2.02051	2.87558	0.596838	3.77968	4.66796	2.44781	1.8389	0.75529
133	-0.80344	1.90395	1.59501	-0.615955	0.201544	-0.80344	0.569291	-0.641102	0.736154	0.0255653	4.95315	0.809601	1.80217	1.63062	2.14972	1.33602	7.13034	1.99213	0.528885	2.00571	-0.80344	1.90395	1.49925	-0.615955	0.201544	-0.80344	0.569291	0.736154	0.0255653	4.95315	0.809601	1.80217	1.63062	1.9731	2.00373	0.512299	-0.138192	1.87016	0.528885	2.00571	0.528885	2.00571	2.84802	0.589318	3.58914	4.55659	2.39304	1.80485	0.745174
134	-0.806786	2.02149	1.49925	-0.595745	0.113209	-0.806786	0.6944	-0.657461	0.813049	0.0565803	5.10608	0.809998	1.8402	1.58126	2.17512	1.32985	7.12343	1.87016	0.569089	2.01375	-0.806786	2.02149	1.50311	-0.595745	0.113209	-0.806786	0.6944	0.813049	0.0565803	5.10608	0.809998	1.8402	1.58126	2.01457	2.03001	0.504006	-0.110701	1.94384	0.569089	2.01375	0.569089	2.01375	2.86076	0.593328	3.71743	4.61001	2.40489	1.81532	0.748982
135	-0.808968	2.00689	1.50311	-0.657683	0.103021	-0.808968	0.506271	-0.66112	0.835589	0.00324669	4.95587	0.782459	1.77101	1.58773	2.00373	1.37227	7.11566	1.94384	0.490441	1.98937	-0.808968	2.00689	1.53513	-0.657683	0.103021	-0.808968	0.506271	0.835589	0.00324669	4.95587	0.782459	1.77101	1.58773	2.08648	2.03293	0.522652	-0.14699	1.76492	0.490441	1.98937	0.490441	1.98937	2.9016	0.573649	3.61905	4.54114	2.34002	1.81508	0.730212
136	-0.806304	2.04081	1.53513	-0.625877	0.139701	-0.806304	0.52033	-0.648077	0.782694	0.00660559	4.92776	0.802685	1.83862	1.57888	2.03001	1.32552	7.13955	1.76492	0.503371	2.00822	-0.806304	2.04081	1.54106	-0.625877	0.139701	-0.806304	0.52033	0.782694	0.00660559	4.92776	0.802685	1.83862	1.57888	2.03724	1.9731	0.482952	-0.146661	1.74871	0.503371	2.00822	0.503371	2.00822	2.88336	0.575282	3.6766	4.34783	2.38561	1.87501	0.73214
137	-0.763973	2.07265	1.54106	-0.609537	0.111301	-0.763973	0.443789	-0.671052	0.745699	-0.0298453	4.95858	0.811869	1.82698	1.5934	2.03293	1.35541	6.82369	1.74871	0.505976	1.99413	-0.763973	2.07265	1.52517	-0.609537	0.111301	-0.763973	0.443789	0.745699	-0.0298453	4.95858	0.811869	1.82698	1.5934	2.00426	2.01457	0.481866	-0.159834	1.75297	0.505976	1.99413	0.505976	1.99413	2.81214	0.567622	3.45195	4.75422	2.39104	1.80676	0.72542
138	-0.761359	1.88856	1.52517	-0.639373	0.0846577	-0.761359	0.503592	-0.681142	0.789614	-0.0253874	4.94219	0.76711	1.73014	1.50745	1.9731	1.3478	6.96587	1.75297	0.465567	1.99488	-0.761359	1.88856	1.47835	-0.639373	0.0846577	-0.761359	0.503592	0.789614	-0.0253874	4.94219	0.76711	1.73014	1.50745	2.00896	2.08648	0.49411	-0.161925	1.72883	0.465567	1.99488	0.465567	1.99488	2.90912	0.566727	3.57213	4.53182	2.35614	1.80899	0.723743
139	-0.780752	1.97738	1.47835	-0.619402	0.127322	-0.780752	0.489585	-0.651348	0.706396	-0.0263402	4.91096	0.784656	1.78776	1.51476	2.01457	1.39463	6.90511	1.72883	0.456958	1.95377	-0.780752	1.97738	1.50367	-0.619402	0.127322	-0.780752	0.489585	0.706396	-0.0263402	4.91096	0.784656	1.78776	1.51476	1.87328	2.03724	0.480157	-0.149836	1.82395	0.456958	1.95377	0.456958	1.95377	2.84887	0.560589	3.61253	4.52044	2.36306	1.82007	0.717658
140	-0.775953	2.06898	1.50367	-0.698388	0.129893	-0.775953	0.470603	-0.656188	0.802829	-0.0116649	4.97429	0.78703	1.77893	1.55023	2.08648	1.40773	6.94742	1.82395	0.454775	1.9643	-0.775953	2.06898	1.36815	-0.698388	0.129893	-0.775953	0.470603	0.802829	-0.0116649	4.97429	0.78703	1.77893	1.55023	1.8367	2.00426	0.456795	-0.158107	1.70923	0.454775	1.9643	0.454775	1.9643	2.90743	0.560006	3.29825	4.61651	2.36476	1.83015	0.71608
141	-0.77108	2.15925	1.36815	-0.638588	0.0504822	-0.77108	0.436827	-0.659302	0.741729	-0.0187062	4.92486	0.807366	1.8668	1.58279	2.03724	1.40303	6.85382	1.70923	0.408515	2.00745	-0.77108	2.15925	1.37319	-0.638588	0.0504822	-0.77108	0.436827	0.741729	-0.0187062	4.92486	0.807366	1.8668	1.58279	1.98796	2.00896	0.436747	-0.1675	1.76484	0.408515	2.00745	0.408515	2.00745	2.86785	0.564343	3.41798	4.7889	2.37362	1.82559	0.722718
142	-0.787941	2.0581	1.37319	-0.653598	0.0967793	-0.787941	0.342081	-0.671645	0.665647	-0.0714612	4.92451	0.794621	1.78891	1.55573	2.00426	1.37557	6.88925	1.76484	0.411019	1.96438	-0.787941	2.0581	1.50877	-0.653598	0.0967793	-0.787941	0.342081	0.665647	-0.0714612	4.92451	0.794621	1.78891	1.55573	1.86628	1.87328	0.448968	-0.185413	1.68924	0.411019	1.96438	0.411019	1.96438	2.86845	0.547595	3.69978	4.6353	2.35786	1.83029	0.708637
143	-0.767644	1.95605	1.50877	-0.657421	0.0955943	-0.767644	0.340508	-0.698176	0.675723	-0.0789348	4.91475	0.756069	1.73861	1.51836	2.00896	1.36563	6.94694	1.68924	0.436936	1.96363	-0.767644	1.95605	1.40398	-0.657421	0.0955943	-0.767644	0.340508	0.675723	-0.0789348	4.91475	0.756069	1.73861	1.51836	1.88685	1.8367	0.460735	-0.154198	1.7915	0.436936	1.96363	0.436936	1.96363	2.87441	0.540033	3.32058	4.43701	2.31475	1.87494	0.695715
144	-0.781964	1.91636	1.40398	-0.612745	0.0278126	-0.781964	0.280519	-0.702731	0.698983	-0.105384	4.83812	0.725054	1.71143	1.4579	1.87328	1.39955	6.86137	1.7915	0.436433	1.97292	-0.781964	1.91636	1.44889	-0.612745	0.0278126	-0.781964	0.280519	0.698983	-0.105384	4.83812	0.725054	1.71143	1.4579	1.85209	1.98796	0.45954	-0.172975	1.65255	0.436433	1.97292	0.436433	1.97292	2.82526	0.53828	3.43054	4.59294	2.31249	1.82661	0.695913
145	-0.795769	2.07891	1.44889	-0.65493	-0.00250252	-0.795769	0.321742	-0.714075	0.644207	-0.100086	4.81459	0.741616	1.7245	1.43956	1.8367	1.41083	6.77522	1.65255	0.379407	1.95252	-0.795769	2.07891	1.43983	-0.65493	-0.00250252	-0.795769	0.321742	0.644207	-0.100086	4.81459	0.741616	1.7245	1.43956	1.9976	1.86628	0.467452	-0.163472	1.71951	0.379407	1.95252	0.379407	1.95252	2.87877	0.531018	3.45407	4.50815	2.35311	1.8264	0.688838
146	-0.766879	1.99146	1.43983	-0.621713	0.00561679	-0.766879	0.29078	-0.687259	0.664762	-0.0907023	4.81435	0.718179	1.70955	1.44271	1.98796	1.32915	6.91119	1.71951	0.402363	1.981	-0.766879	1.99146	1.49114	-0.621713	0.00561679	-0.766879	0.29078	0.664762	-0.0907023	4.81435	0.718179	1.70955	1.44271	1.96399	1.88685	0.46404	-0.171343	1.70034	0.402363	1.981	0.402363	1.981	2.84725	0.538911	3.15245	4.45483	2.34656	1.79802	0.694796
147	-0.791577	2.15563	1.49114	-0.663657	0.0309518	-0.791577	0.289571	-0.690688	0.63347	-0.11394	4.84473	0.771401	1.7314	1.49041	1.86628	1.38069	6.99611	1.70034	0.352546	1.91871	-0.791577	2.15563	1.27183	-0.663657	0.0309518	-0.791577	0.289571	0.63347	-0.11394	4.84473	0.771401	1.7314	1.49041	1.98302	1.85209	0.484268	-0.170594	1.64451	0.352546	1.91871	0.352546	1.91871	2.88972	0.534475	3.25704	4.5216	2.32784	1.81376	0.689273
148	-0.777813	1.9882	1.27183	-0.605713	0.00809244	-0.777813	0.200285	-0.70233	0.609235	-0.123952	4.79418	0.736599	1.70965	1.46856	1.88685	1.42386	6.88917	1.64451	0.372933	1.89554	-0.777813	1.9882	1.39759	-0.605713	0.00809244	-0.777813	0.200285	0.609235	-0.123952	4.79418	0.736599	1.70965	1.46856	1.96653	1.9976	0.435062	-0.165471	1.68172	0.372933	1.89554	0.372933	1.89554	2.8615	0.531611	3.32727	4.39631	2.32861	1.81618	0.688286
149	-0.776883	2.03021	1.39759	-0.630384	0.0427895	-0.776883	0.209751	-0.705455	0.617336	-0.134325	4.75514	0.711479	1.70964	1.5023	1.85209	1.41654	6.89806	1.68172	0.349758	1.92103	-0.776883	2.03021	1.39014	-0.630384	0.0427895	-0.776883	0.209751	0.617336	-0.134325	4.75514	0.711479	1.70964	1.5023	1.83368	1.96399	0.433336	-0.179818	1.6134	0.349758	1.92103	0.349758	1.92103	2.82671	0.5262	3.27937	4.37603	2.27628	1.82999	0.681901
150	-0.765867	2.17657	1.39014	-0.619766	0.0604508	-0.765867	0.186217	-0.695801	0.66103	-0.153398	4.83171	0.784736	1.79613	1.48715	1.9976	1.46087	6.84884	1.6134	0.319357	1.92072	-0.765867	2.17657	1.31882	-0.619766	0.0604508	-0.765867	0.186217	0.66103	-0.153398	4.83171	0.784736	1.79613	1.48715	1.93374	1.98302	0.435599	-0.182189	1.60216	0.319357	1.92072	0.319357	1.92072	2.8389	0.533364	3.20925	4.58527	2.28646	1.85145	0.69038
151	-0.767128	2.05	1.31882	-0.615249	-0.028359	-0.767128	0.295747	-0.696565	0.579117	-0.100364	4.84846	0.758897	1.73253	1.50111	1.96399	1.43742	7.03105	1.60216	0.35117	1.91779	-0.767128	2.05	1.33083	-0.615249	-0.028359	-0.767128	0.295747	0.579117	-0.100364	4.84846	0.758897	1.73253	1.50111	1.93182	1.96653	0.389852	-0.163461	1.51948	0.35117	1.91779	0.35117	1.91779	2.84678	0.531279	3.23844	4.51784	2.35252	1.80222	0.688515
152	-0.782719	2.06824	1.33083	-0.661723	-0.0256655	-0.782719	0.244457	-0.723875	0.629614	-0.138906	4.79057	0.731592	1.68195	1.43558	1.98302	1.48474	6.86844	1.51948	0.325218	1.95753	-0.782719	2.06824	1.21109	-0.661723	-0.0256655	-0.782719	0.244457	0.629614	-0.138906	4.79057	0.731592	1.68195	1.43558	1.93268	1.83368	0.42223	-0.176855	1.58827	0.325218	1.95753	0.325218	1.95753	2.89499	0.525686	3.1303	4.53294	2.30111	1.81703	0.68299
153	-0.780901	2.1663	1.21109	-0.605644	0.006442	-0.780901	0.130748	-0.739617	0.578098	-0.162928	4.83372	0.738574	1.7619	1.468	1.96653	1.41781	6.79384	1.58827	0.26169	1.89275	-0.780901	2.1663	1.29208	-0.605644	0.006442	-0.780901	0.130748	0.578098	-0.162928	4.83372	0.738574	1.7619	1.468	1.88167	1.93374	0.392591	-0.171138	1.54537	0.26169	1.89275	0.26169	1.89275	2.85598	0.515243	3.20413	4.66861	2.32374	1.75089	0.673871
154	-0.80432	2.0084	1.29208	-0.59678	0.0171888	-0.80432	0.225299	-0.738814	0.512432	-0.137503	4.88617	0.721384	1.72407	1.46365	1.83368	1.45419	7.01394	1.54537	0.314761	1.87629	-0.80432	2.0084	1.23001	-0.59678	0.0171888	-0.80432	0.225299	0.512432	-0.137503	4.88617	0.721384	1.72407	1.46365	1.87626	1.93182	0.397154	-0.166028	1.47577	0.314761	1.87629	0.314761	1.87629	2.81321	0.523286	3.18873	4.52127	2.24622	1.76598	0.679513
155	-0.786571	2.01577	1.23001	-0.693369	-0.0142924	-0.786571	0.137866	-0.746106	0.50837	-0.174049	4.7816	0.679658	1.71877	1.45718	1.93374	1.50299	6.8919	1.47577	0.281443	1.896	-0.786571	2.01577	1.27624	-0.693369	-0.0142924	-0.786571	0.137866	0.50837	-0.174049	4.7816	0.679658	1.71877	1.45718	1.94755	1.93268	0.412978	-0.171702	1.54778	0.281443	1.896	0.281443	1.896	2.8346	0.509274	3.17745	4.46444	2.23408	1.79972	0.666192
156	-0.785699	2.06597	1.27624	-0.671418	-0.0559238	-0.785699	0.158721	-0.751945	0.464259	-0.152671	4.89996	0.717655	1.68457	1.43559	1.93182	1.47052	6.93384	1.54778	0.270686	1.8834	-0.785699	2.06597	1.41757	-0.671418	-0.0559238	-0.785699	0.158721	0.464259	-0.152671	4.89996	0.717655	1.68457	1.43559	1.87266	1.88167	0.399942	-0.201827	1.42663	0.270686	1.8834	0.270686	1.8834	2.85988	0.515518	3.13233	4.48336	2.26553	1.80457	0.673383
157	-0.789377	2.01476	1.41757	-0.613007	-0.0286058	-0.789377	0.211355	-0.748462	0.50001	-0.136261	4.94585	0.715729	1.70751	1.4155	1.93268	1.38303	6.80685	1.42663	0.297034	1.84864	-0.789377	2.01476	1.39237	-0.613007	-0.0286058	-0.789377	0.211355	0.50001	-0.136261	4.94585	0.715729	1.70751	1.4155	1.85056	1.87626	0.391413	-0.19116	1.39902	0.297034	1.84864	0.297034	1.84864	2.85829	0.510994	3.18164	4.61685	2.28911	1.83275	0.667202
158	-0.791792	2.26537	1.39237	-0.587164	0.00697344	-0.791792	0.0699419	-0.738495	0.543087	-0.189276	4.83151	0.752086	1.82049	1.45434	1.88167	1.44222	6.78274	1.39902	0.246814	1.78085	-0.791792	2.26537	1.30748	-0.587164	0.00697344	-0.791792	0.0699419	0.543087	-0.189276	4.83151	0.752086	1.82049	1.45434	1.88144	1.94755	0.355199	-0.200509	1.53135	0.246814	1.78085	0.246814	1.78085	2.85373	0.50916	3.12909	4.40492	2.34336	1.76739	0.664623
159	-0.80168	1.92058	1.30748	-0.57674	-0.0433557	-0.80168	0.0626082	-0.775195	0.518304	-0.196928	4.80717	0.671995	1.67244	1.40311	1.87626	1.42437	6.90677	1.53135	0.215239	1.85167	-0.80168	1.92058	1.42441	-0.57674	-0.0433557	-0.80168	0.0626082	0.518304	-0.196928	4.80717	0.671995	1.67244	1.40311	1.83742	1.87266	0.37947	-0.173514	1.34573	0.215239	1.85167	0.215239	1.85167	2.8271	0.497777	3.05133	4.50647	2.26143	1.77394	0.654762
160	-0.796401	2.02921	1.42441	-0.649638	0.0258775	-0.796401	0.0568876	-0.755785	0.505203	-0.202263	4.85575	0.696525	1.69734	1.44184	1.94755	1.42876	6.89195	1.34573	0.24565	1.83839	-0.796401	2.02921	1.37393	-0.649638	0.0258775	-0.796401	0.0568876	0.505203	-0.202263	4.85575	0.696525	1.69734	1.44184	1.83421	1.85056	0.375494	-0.177555	1.55114	0.24565	1.83839	0.24565	1.83839	2.8799	0.496519	3.02321	4.4918	2.33091	1.83088	0.653535
161	-0.804012	1.95208	1.37393	-0.630475	-0.0354064	-0.804012	0.131162	-0.738011	0.410848	-0.185562	4.8211	0.686185	1.73624	1.5017	1.87266	1.4607	6.9511	1.55114	0.244438	1.85274	-0.804012	1.95208	1.21813	-0.630475	-0.0354064	-0.804012	0.131162	0.410848	-0.185562	4.8211	0.686185	1.73624	1.5017	1.75793	1.88144	0.379042	-0.182114	1.41846	0.244438	1.85274	0.244438	1.85274	2.82928	0.500438	3.1187	4.52296	2.28387	1.83537	0.657133
162	-0.797645	2.10385	1.21813	-0.584388	-0.00970172	-0.797645	0.0367464	-0.726084	0.478222	-0.19532	4.82864	0.732134	1.77808	1.50027	1.85056	1.40274	6.90634	1.41846	0.247255	1.85723	-0.797645	2.10385	1.33811	-0.584388	-0.00970172	-0.797645	0.0367464	0.478222	-0.19532	4.82864	0.732134	1.77808	1.50027	1.74815	1.83742	0.423417	-0.193407	1.4114	0.247255	1.85723	0.247255	1.85723	2.85017	0.503029	3.0699	4.49054	2.3496	1.79611	0.658484
163	-0.764215	2.02678	1.33811	-0.640978	-0.020989	-0.764215	0.167472	-0.725967	0.401791	-0.16701	4.89556	0.716532	1.68138	1.46342	1.88144	1.45242	6.93898	1.4114	0.231885	1.8217	-0.764215	2.02678	1.24627	-0.640978	-0.020989	-0.764215	0.167472	0.401791	-0.16701	4.89556	0.716532	1.68138	1.46342	1.81935	1.83421	0.381255	-0.197354	1.40881	0.231885	1.8217	0.231885	1.8217	2.80629	0.500652	3.23367	4.54519	2.22785	1.7311	0.657693
164	-0.773421	2.08878	1.24627	-0.62103	-0.018855	-0.773421	0.0813623	-0.736257	0.446233	-0.184836	4.92578	0.735996	1.77833	1.51024	1.83742	1.50452	7.01133	1.40881	0.228382	1.82172	-0.773421	2.08878	1.43733	-0.62103	-0.018855	-0.773421	0.0813623	0.446233	-0.184836	4.92578	0.735996	1.77833	1.51024	1.89774	1.75793	0.371856	-0.196413	1.35839	0.228382	1.82172	0.228382	1.82172	2.78686	0.501111	3.04068	4.40247	2.27012	1.7549	0.658421
165	-0.80608	1.9481	1.43733	-0.6551	0.0152256	-0.80608	0.0954726	-0.749858	0.422305	-0.182835	4.87656	0.702171	1.70342	1.5022	1.83421	1.44816	6.96523	1.35839	0.247439	1.81975	-0.80608	1.9481	1.50392	-0.6551	0.0152256	-0.80608	0.0954726	0.422305	-0.182835	4.87656	0.702171	1.70342	1.5022	1.8705	1.74815	0.362928	-0.182034	1.41583	0.247439	1.81975	0.247439	1.81975	2.729	0.497531	2.96296	4.60941	2.23277	1.78015	0.653646
166	-0.832853	2.04063	1.50392	-0.609195	-0.00513909	-0.832853	0.045011	-0.756862	0.427794	-0.174959	4.92886	0.735395	1.71945	1.43073	1.75793	1.40306	6.92071	1.41583	0.192064	1.78109	-0.832853	2.04063	1.42162	-0.609195	-0.00513909	-0.832853	0.045011	0.427794	-0.174959	4.92886	0.735395	1.71945	1.43073	1.81767	1.81935	0.352233	-0.214536	1.38428	0.192064	1.78109	0.192064	1.78109	2.81692	0.491039	2.94326	4.39539	2.27269	1.7476	0.6469
167	-0.79215	2.13158	1.42162	-0.603494	-0.0476617	-0.79215	0.0108637	-0.769993	0.39053	-0.213639	4.81489	0.709251	1.76565	1.46479	1.74815	1.42525	6.85748	1.38428	0.203611	1.75029	-0.79215	2.13158	1.25835	-0.603494	-0.0476617	-0.79215	0.0108637	0.39053	-0.213639	4.81489	0.709251	1.76565	1.46479	1.87798	1.89774	0.358846	-0.205293	1.35473	0.203611	1.75029	0.203611	1.75029	2.79	0.494096	3.16085	4.73362	2.27764	1.78005	0.654525
168	-0.795976	2.03483	1.25835	-0.620598	-0.0279415	-0.795976	0.0643978	-0.756544	0.400534	-0.185731	4.91755	0.696093	1.68892	1.40993	1.81935	1.42736	6.83469	1.35473	0.22618	1.80787	-0.795976	2.03483	1.23707	-0.620598	-0.0279415	-0.795976	0.0643978	0.400534	-0.185731	4.91755	0.696093	1.68892	1.40993	1.86911	1.8705	0.391133	-0.213422	1.4169	0.22618	1.80787	0.22618	1.80787	2.77933	0.49382	2.81975	4.38748	2.2705	1.7414	0.647716
169	-0.780054	2.16418	1.23707	-0.598817	-0.0603246	-0.780054	0.129486	-0.77637	0.405492	-0.185264	4.85278	0.695769	1.82342	1.49355	1.89774	1.45663	6.72187	1.4169	0.204398	1.79544	-0.780054	2.16418	1.39687	-0.598817	-0.0603246	-0.780054	0.129486	0.405492	-0.185264	4.85278	0.695769	1.82342	1.49355	1.82438	1.81767	0.361367	-0.197812	1.34322	0.204398	1.79544	0.204398	1.79544	2.74745	0.494004	2.92474	4.45654	2.29767	1.7113	0.64974
170	-0.828486	2.0387	1.39687	-0.607715	-0.0459733	-0.828486	0.00498734	-0.781082	0.425472	-0.196082	4.89671	0.697952	1.80734	1.48078	1.8705	1.48698	6.81129	1.34322	0.17928	1.7522	-0.828486	2.0387	1.32034	-0.607715	-0.0459733	-0.828486	0.00498734	0.425472	-0.196082	4.89671	0.697952	1.80734	1.48078	1.94084	1.87798	0.375438	-0.172808	1.36342	0.17928	1.7522	0.17928	1.7522	2.71426	0.494356	3.10882	4.53328	2.27959	1.72191	0.649266
171	-0.782519	1.97821	1.32034	-0.632272	-0.0380149	-0.782519	0.190096	-0.781322	0.301123	-0.169587	4.93754	0.677438	1.68945	1.41166	1.81767	1.42254	6.79535	1.36342	0.176254	1.73675	-0.782519	1.97821	1.3156	-0.632272	-0.0380149	-0.782519	0.190096	0.301123	-0.169587	4.93754	0.677438	1.68945	1.41166	1.73958	1.86911	0.34705	-0.193226	1.39431	0.176254	1.73675	0.176254	1.73675	2.71033	0.4892	2.83295	4.40992	2.25667	1.7302	0.643128
172	-0.803324	2.11909	1.3156	-0.612586	-0.111222	-0.803324	-0.00805708	-0.744206	0.383652	-0.230431	4.87085	0.715889	1.77178	1.38484	1.87798	1.398	6.80691	1.39431	0.134956	1.73811	-0.803324	2.11909	1.35023	-0.612586	-0.111222	-0.803324	-0.00805708	0.383652	-0.230431	4.87085	0.715889	1.77178	1.38484	1.79998	1.82438	0.388238	-0.217524	1.39713	0.134956	1.73811	0.134956	1.73811	2.74543	0.48473	2.82636	4.56191	2.23453	1.68602	0.637086
173	-0.791336	2.13903	1.35023	-0.584604	-0.0623926	-0.791336	0.0339327	-0.778202	0.344483	-0.21587	4.83426	0.711829	1.73831	1.45163	1.86911	1.4211	6.7866	1.39713	0.143055	1.65984	-0.791336	2.13903	1.45441	-0.584604	-0.0623926	-0.791336	0.0339327	0.344483	-0.21587	4.83426	0.711829	1.73831	1.45163	1.71067	1.94084	0.322821	-0.212185	1.43043	0.143055	1.65984	0.143055	1.65984	2.78885	0.483604	2.76456	4.33562	2.23432	1.73866	0.637076
174	-0.804286	2.09428	1.45441	-0.552502	-0.0432798	-0.804286	0.0841761	-0.755104	0.34399	-0.218686	4.87783	0.700883	1.77254	1.47316	1.82438	1.37413	6.76736	1.43043	0.124932	1.67386	-0.804286	2.09428	1.34278	-0.552502	-0.0432798	-0.804286	0.0841761	0.34399	-0.218686	4.87783	0.700883	1.77254	1.47316	1.80985	1.73958	0.360921	-0.222678	1.50778	0.124932	1.67386	0.124932	1.67386	2.7763	0.489433	2.75983	4.48575	2.25883	1.72172	0.645874
175	-0.789576	1.98832	1.34278	-0.613178	-0.106385	-0.789576	-0.0365155	-0.767956	0.281739	-0.237299	4.83108	0.697655	1.73941	1.4762	1.94084	1.44773	6.54392	1.50778	0.143642	1.70386	-0.789576	1.98832	1.42678	-0.613178	-0.106385	-0.789576	-0.0365155	0.281739	-0.237299	4.83108	0.697655	1.73941	1.4762	1.82112	1.79998	0.382208	-0.223575	1.28325	0.143642	1.70386	0.143642	1.70386	2.76864	0.471659	3.0859	4.49322	2.24879	1.681	0.627748
176	-0.774699	2.08346	1.42678	-0.589384	-0.0481263	-0.774699	-0.0678491	-0.770576	0.305451	-0.239465	4.83738	0.689485	1.74099	1.44563	1.73958	1.45157	6.80081	1.28325	0.159948	1.70882	-0.774699	2.08346	1.39999	-0.589384	-0.0481263	-0.774699	-0.0678491	0.305451	-0.239465	4.83738	0.689485	1.74099	1.44563	1.77318	1.71067	0.337724	-0.237335	1.33072	0.159948	1.70882	0.159948	1.70882	2.72791	0.479957	2.70936	4.5419	2.28874	1.70422	0.634879
177	-0.812464	2.01427	1.39999	-0.574966	-0.0901175	-0.812464	-0.0273912	-0.75863	0.263342	-0.215128	4.85024	0.68494	1.73573	1.46467	1.79998	1.45846	6.72003	1.33072	0.187929	1.69559	-0.812464	2.01427	1.43931	-0.574966	-0.0901175	-0.812464	-0.0273912	0.263342	-0.215128	4.85024	0.68494	1.73573	1.46467	1.83229	1.80985	0.332958	-0.211318	1.30149	0.187929	1.69559	0.187929	1.69559	2.69461	0.476477	2.64024	4.40582	2.22173	1.68386	0.631509
178	-0.791801	1.99484	1.43931	-0.654428	-0.0276766	-0.791801	-0.00359856	-0.766134	0.31817	-0.239343	4.82608	0.679192	1.75048	1.55193	1.71067	1.42717	6.63423	1.30149	0.182234	1.70483	-0.791801	1.99484	1.4006	-0.654428	-0.0276766	-0.791801	-0.00359856	0.31817	-0.239343	4.82608	0.679192	1.75048	1.55193	1.77725	1.82112	0.360245	-0.2101	1.41436	0.182234	1.70483	0.182234	1.70483	2.67392	0.479756	2.97191	4.59652	2.23572	1.68616	0.635797
179	-0.813975	2.0575	1.4006	-0.599523	-0.051579	-0.813975	0.0134395	-0.797294	0.240637	-0.225697	4.91528	0.701794	1.75462	1.48803	1.80985	1.42365	6.80959	1.41436	0.174262	1.64701	-0.813975	2.0575	1.34583	-0.599523	-0.051579	-0.813975	0.0134395	0.240637	-0.225697	4.91528	0.701794	1.75462	1.48803	1.79749	1.77318	0.342019	-0.184898	1.28369	0.174262	1.64701	0.174262	1.64701	2.73421	0.482057	2.96835	4.59911	2.26758	1.67966	0.639546
180	-0.800078	1.98729	1.34583	-0.623602	-0.0781378	-0.800078	-0.0355945	-0.764449	0.320514	-0.244708	4.85341	0.693832	1.76355	1.47336	1.82112	1.46079	6.68222	1.28369	0.150172	1.64887	-0.800078	1.98729	1.40197	-0.623602	-0.0781378	-0.800078	-0.0355945	0.320514	-0.244708	4.85341	0.693832	1.76355	1.47336	1.78061	1.83229	0.333867	-0.217988	1.17113	0.150172	1.64887	0.150172	1.64887	2.685	0.473865	2.80145	4.7873	2.31642	1.62592	0.632288
181	-0.804245	2.07213	1.40197	-0.573372	-0.0559609	-0.804245	-0.0151012	-0.7826	0.33052	-0.230076	4.8974	0.691837	1.81554	1.50557	1.77318	1.40784	6.6819	1.17113	0.117404	1.68551	-0.804245	2.07213	1.42846	-0.573372	-0.0559609	-0.804245	-0.0151012	0.33052	-0.230076	4.8974	0.691837	1.81554	1.50557	1.74116	1.77725	0.335741	-0.204401	1.22373	0.117404	1.68551	0.117404	1.68551	2.75486	0.479383	2.90627	4.50273	2.20858	1.75324	0.637089
182	-0.81082	2.11749	1.42846	-0.571369	-0.128704	-0.81082	-0.0288803	-0.783061	0.2945	-0.250368	4.83708	0.675957	1.77998	1.50211	1.83229	1.43046	6.63757	1.22373	0.13083	1.70034	-0.81082	2.11749	1.41925	-0.571369	-0.128704	-0.81082	-0.0288803	0.2945	-0.250368	4.83708	0.675957	1.77998	1.50211	1.64724	1.79749	0.352575	-0.21797	1.22384	0.13083	1.70034	0.13083	1.70034	2.72168	0.469566	2.75325	4.38388	2.3105	1.6989	0.623439
183	-0.779042	2.00213	1.41925	-0.601457	-0.138805	-0.779042	0.0125699	-0.785172	0.257543	-0.264685	4.80665	0.669671	1.72724	1.4794	1.77725	1.38672	6.6035	1.22384	0.105785	1.64884	-0.779042	2.00213	1.36972	-0.601457	-0.138805	-0.779042	0.0125699	0.257543	-0.264685	4.80665	0.669671	1.72724	1.4794	1.78737	1.78061	0.315342	-0.197478	1.35049	0.105785	1.64884	0.105785	1.64884	2.71143	0.464761	2.91279	4.46495	2.312	1.73109	0.621424
184	-0.812024	2.01948	1.36972	-0.68133	-0.135875	-0.812024	0.0100873	-0.788443	0.194593	-0.232828	4.87859	0.64991	1.72101	1.44076	1.79749	1.42142	6.61984	1.35049	0.135471	1.65716	-0.812024	2.01948	1.58332	-0.68133	-0.135875	-0.812024	0.0100873	0.194593	-0.232828	4.87859	0.64991	1.72101	1.44076	1.82309	1.74116	0.357061	-0.182016	1.21493	0.135471	1.65716	0.135471	1.65716	2.68586	0.465917	2.89984	4.56891	2.25523	1.66742	0.621573
185	-0.781216	2.15559	1.58332	-0.668061	-0.0690984	-0.781216	0.0283052	-0.773804	0.25093	-0.231568	4.88946	0.699757	1.73764	1.50232	1.78061	1.39652	6.65141	1.21493	0.131599	1.71766	-0.781216	2.15559	1.41522	-0.668061	-0.0690984	-0.781216	0.0283052	0.25093	-0.231568	4.88946	0.699757	1.73764	1.50232	1.68123	1.64724	0.34	-0.209685	1.11018	0.131599	1.71766	0.131599	1.71766	2.69413	0.47389	2.87689	4.51034	2.22511	1.68203	0.629037
186	-0.80222	2.236	1.41522	-0.678883	-0.0719627	-0.80222	-0.0132503	-0.783648	0.289655	-0.214297	4.89577	0.694005	1.77405	1.49801	1.74116	1.43077	6.64962	1.11018	0.143652	1.68826	-0.80222	2.236	1.44413	-0.678883	-0.0719627	-0.80222	-0.0132503	0.289655	-0.214297	4.89577	0.694005	1.77405	1.49801	1.76206	1.78737	0.339472	-0.218514	1.14854	0.143652	1.68826	0.143652	1.68826	2.66291	0.476731	2.89052	4.48687	2.25634	1.66777	0.63295
187	-0.814198	2.1332	1.44413	-0.565179	-0.123705	-0.814198	-0.0718833	-0.781278	0.188166	-0.25913	4.85207	0.691085	1.75932	1.48651	1.64724	1.40383	6.70309	1.14854	0.112948	1.65881	-0.814198	2.1332	1.55498	-0.565179	-0.123705	-0.814198	-0.0718833	0.188166	-0.25913	4.85207	0.691085	1.75932	1.48651	1.74202	1.82309	0.357486	-0.185103	1.19196	0.112948	1.65881	0.112948	1.65881	2.70133	0.47241	2.73108	4.40403	2.26114	1.6877	0.626069
188	-0.793926	2.04911	1.55498	-0.665648	-0.0796653	-0.793926	-0.0387295	-0.7922	0.345337	-0.22801	4.87669	0.665495	1.71117	1.47364	1.78737	1.39277	6.69209	1.19196	0.161132	1.6692	-0.793926	2.04911	1.44165	-0.665648	-0.0796653	-0.793926	-0.0387295	0.345337	-0.22801	4.87669	0.665495	1.71117	1.47364	1.82204	1.68123	0.334555	-0.205	1.06067	0.161132	1.6692	0.161132	1.6692	2.69685	0.468937	2.76746	4.36138	2.19696	1.63003	0.622672
189	-0.79083	2.00744	1.44165	-0.638008	-0.119987	-0.79083	0.013253	-0.806908	0.159393	-0.229898	4.9339	0.668637	1.75451	1.56914	1.82309	1.33656	6.52017	1.06067	0.0991528	1.68341	-0.79083	2.00744	1.45229	-0.638008	-0.119987	-0.79083	0.013253	0.159393	-0.229898	4.9339	0.668637	1.75451	1.56914	1.76604	1.76206	0.342396	-0.180816	1.042	0.0991528	1.68341	0.0991528	1.68341	2.65851	0.468926	3.009	4.52815	2.24155	1.62554	0.626833
190	-0.788016	2.12892	1.45229	-0.625741	-0.116534	-0.788016	-0.0199326	-0.770145	0.211364	-0.248794	4.83864	0.700198	1.71777	1.53069	1.68123	1.35205	6.64041	1.042	0.0868651	1.67691	-0.788016	2.12892	1.55053	-0.625741	-0.116534	-0.788016	-0.0199326	0.211364	-0.248794	4.83864	0.700198	1.71777	1.53069	1.75453	1.74202	0.339829	-0.172333	1.12902	0.0868651	1.67691	0.0868651	1.67691	2.65954	0.468604	2.88926	4.4664	2.2312	1.63382	0.626638
191	-0.819545	2.02278	1.55053	-0.584775	-0.0887897	-0.819545	-0.0660179	-0.775204	0.207394	-0.259574	4.85866	0.66865	1.77328	1.51069	1.76206	1.35718	6.61495	1.12902	0.127308	1.67892	-0.819545	2.02278	1.49501	-0.584775	-0.0887897	-0.819545	-0.0660179	0.207394	-0.259574	4.85866	0.66865	1.77328	1.51069	1.6191	1.82204	0.336435	-0.210291	1.00098	0.127308	1.67892	0.127308	1.67892	2.58019	0.465611	2.67719	4.38024	2.24473	1.68207	0.621084
192	-0.814116	2.1856	1.49501	-0.668812	-0.15163	-0.814116	-0.0841941	-0.79556	0.215527	-0.271725	4.8221	0.682594	1.78012	1.49603	1.74202	1.421	6.68008	1.00098	0.115112	1.65085	-0.814116	2.1856	1.58911	-0.668812	-0.15163	-0.814116	-0.0841941	0.215527	-0.271725	4.8221	0.682594	1.78012	1.49603	1.65659	1.76604	0.336461	-0.173427	1.05578	0.115112	1.65085	0.115112	1.65085	2.66488	0.459799	2.71077	4.47746	2.21091	1.63789	0.61679
193	-0.792672	2.22616	1.58911	-0.666184	-0.119987	-0.792672	-0.108307	-0.768646	0.229152	-0.283437	4.78411	0.679142	1.75704	1.46473	1.82204	1.37485	6.61511	1.05578	0.122328	1.64721	-0.792672	2.22616	1.53344	-0.666184	-0.119987	-0.792672	-0.108307	0.229152	-0.283437	4.78411	0.679142	1.75704	1.46473	1.73694	1.75453	0.326073	-0.214473	0.970636	0.122328	1.64721	0.122328	1.64721	2.6423	0.464985	2.59454	4.44203	2.17604	1.69088	0.620095
194	-0.803324	2.13504	1.53344	-0.596609	-0.131359	-0.803324	-0.0331327	-0.806683	0.239055	-0.245141	4.89112	0.684053	1.77632	1.51747	1.76604	1.33411	6.3746	0.970636	0.106087	1.62812	-0.803324	2.13504	1.5445	-0.596609	-0.131359	-0.803324	-0.0331327	0.239055	-0.245141	4.89112	0.684053	1.77632	1.51747	1.70491	1.6191	0.340174	-0.200224	0.989473	0.106087	1.62812	0.106087	1.62812	2.64025	0.463158	2.76814	4.59797	2.29595	1.64709	0.618769
195	-0.772939	2.22383	1.5445	-0.641115	-0.144715	-0.772939	-0.115693	-0.777546	0.214817	-0.270539	4.88544	0.705026	1.83196	1.51443	1.75453	1.42782	6.46225	0.989473	0.125657	1.64341	-0.772939	2.22383	1.50794	-0.641115	-0.144715	-0.772939	-0.115693	0.214817	-0.270539	4.88544	0.705026	1.83196	1.51443	1.64992	1.65659	0.329741	-0.192707	0.942147	0.125657	1.64341	0.125657	1.64341	2.60566	0.467358	2.61429	4.51927	2.20448	1.6267	0.621848
196	-0.809965	2.11229	1.50794	-0.635391	-0.177752	-0.809965	0.0028151	-0.793277	0.233842	-0.222596	4.89205	0.663821	1.80372	1.51012	1.6191	1.48248	6.62834	0.942147	0.125179	1.62876	-0.809965	2.11229	1.51139	-0.635391	-0.177752	-0.809965	0.0028151	0.233842	-0.222596	4.89205	0.663821	1.80372	1.51012	1.63252	1.73694	0.315124	-0.238152	0.996501	0.125179	1.62876	0.125179	1.62876	2.61002	0.46284	2.63733	4.47156	2.22242	1.68979	0.617863
197	-0.78457	2.13539	1.51139	-0.676846	-0.186383	-0.78457	-0.0453394	-0.801579	0.108422	-0.249594	4.93189	0.673281	1.75949	1.57132	1.65659	1.42324	6.54632	0.996501	0.0882581	1.62376	-0.78457	2.13539	1.50867	-0.676846	-0.186383	-0.78457	-0.0453394	0.108422	-0.249594	4.93189	0.673281	1.75949	1.57132	1.63204	1.70491	0.316939	-0.213292	0.980477	0.0882581	1.62376	0.0882581	1.62376	2.63691	0.460613	2.74412	4.39007	2.20118	1.65259	0.616006
198	-0.775688	2.14701	1.50867	-0.606395	-0.0889135	-0.775688	-0.0145321	-0.809519	0.104607	-0.237029	4.92555	0.6635	1.81651	1.58121	1.73694	1.51354	6.40386	0.980477	0.124455	1.57451	-0.775688	2.14701	1.58706	-0.606395	-0.0889135	-0.775688	-0.0145321	0.104607	-0.237029	4.92555	0.6635	1.81651	1.58121	1.70721	1.64992	0.34147	-0.185258	0.905672	0.124455	1.57451	0.124455	1.57451	2.61693	0.463726	2.52696	4.59017	2.21599	1.60803	0.621954
199	-0.795081	2.24218	1.58706	-0.622623	-0.15144	-0.795081	-0.00802638	-0.808128	0.202325	-0.23983	4.92758	0.691224	1.76685	1.50453	1.70491	1.45228	6.44182	0.905672	0.141064	1.5916	-0.795081	2.24218	1.63541	-0.622623	-0.15144	-0.795081	-0.00802638	0.202325	-0.23983	4.92758	0.691224	1.76685	1.50453	1.64393	1.63252	0.358076	-0.231105	0.89192	0.141064	1.5916	0.141064	1.5916	2.587	0.459339	2.44293	4.35562	2.10909	1.63831	0.613574
200	-0.822318	2.1922	1.63541	-0.612632	-0.148452	-0.822318	0.0229256	-0.804528	0.163631	-0.234112	4.87122	0.665608	1.80031	1.54582	1.64992	1.38292	6.36209	0.89192	0.112992	1.57518	-0.822318	2.1922	1.60338	-0.612632	-0.148452	-0.822318	0.0229256	0.163631	-0.234112	4.87122	0.665608	1.80031	1.54582	1.59753	1.63204	0.342942	-0.216788	1.04684	0.112992	1.57518	0.112992	1.57518	2.59543	0.460747	2.48428	4.57126	2.13905	1.63456	0.614459
201	-0.807732	2.11125	1.60338	-0.585071	-0.18683	-0.807732	0.0121466	-0.831843	0.138469	-0.248845	4.88554	0.648082	1.78194	1.55276	1.63252	1.4532	6.42266	1.04684	0.0823624	1.56939	-0.807732	2.11125	1.50758	-0.585071	-0.18683	-0.807732	0.0121466	0.138469	-0.248845	4.88554	0.648082	1.78194	1.55276	1.74408	1.70721	0.339123	-0.202743	0.92514	0.0823624	1.56939	0.0823624	1.56939	2.53398	0.454269	2.59478	4.49146	2.10435	1.63935	0.609468
202	-0.792955	2.17271	1.50758	-0.530074	-0.161712	-0.792955	-0.0313947	-0.837192	0.189379	-0.239928	4.93509	0.64502	1.84918	1.56249	1.63204	1.49182	6.20531	0.92514	0.0906714	1.60376	-0.792955	2.17271	1.50482	-0.530074	-0.161712	-0.792955	-0.0313947	0.189379	-0.239928	4.93509	0.64502	1.84918	1.56249	1.75645	1.64393	0.362175	-0.215112	1.03631	0.0906714	1.60376	0.0906714	1.60376	2.59585	0.461065	2.77073	4.52174	2.25303	1.64964	0.619794
203	-0.783765	2.18159	1.50482	-0.683606	-0.149116	-0.783765	-0.0318081	-0.794595	0.126192	-0.249198	4.93362	0.724699	1.78685	1.58449	1.70721	1.49426	6.4581	1.03631	0.116349	1.5341	-0.783765	2.18159	1.55064	-0.683606	-0.149116	-0.783765	-0.0318081	0.126192	-0.249198	4.93362	0.724699	1.78685	1.58449	1.74394	1.59753	0.316045	-0.201926	0.988983	0.116349	1.5341	0.116349	1.5341	2.54657	0.464121	2.49984	4.3811	2.22348	1.63258	0.618085
204	-0.776128	2.09489	1.55064	-0.618446	-0.141376	-0.776128	0.0355051	-0.856675	0.0915575	-0.220895	4.97278	0.640166	1.76783	1.5632	1.64393	1.45314	6.32198	0.988983	0.125401	1.55662	-0.776128	2.09489	1.63007	-0.618446	-0.141376	-0.776128	0.0355051	0.0915575	-0.220895	4.97278	0.640166	1.76783	1.5632	1.68986	1.74408	0.339953	-0.199328	0.917104	0.125401	1.55662	0.125401	1.55662	2.55623	0.462028	2.62508	4.52112	2.13842	1.6355	0.620005
205	-0.770407	2.19959	1.63007	-0.678849	-0.16987	-0.770407	-0.103125	-0.804611	0.146354	-0.272687	4.87117	0.676596	1.83592	1.50862	1.59753	1.49613	6.22596	0.917104	0.112882	1.51553	-0.770407	2.19959	1.59488	-0.678849	-0.16987	-0.770407	-0.103125	0.146354	-0.272687	4.87117	0.676596	1.83592	1.50862	1.69638	1.75645	0.333271	-0.215198	0.791826	0.112882	1.51553	0.112882	1.51553	2.54399	0.458274	2.59894	4.47578	2.17218	1.57457	0.614068
206	-0.811185	2.24893	1.59488	-0.656226	-0.164994	-0.811185	-0.0532323	-0.838122	0.172443	-0.239597	4.98681	0.665477	1.78079	1.5402	1.74408	1.45063	6.51731	0.791826	0.0553435	1.57654	-0.811185	2.24893	1.57516	-0.656226	-0.164994	-0.811185	-0.0532323	0.172443	-0.239597	4.98681	0.665477	1.78079	1.5402	1.73056	1.74394	0.360425	-0.234897	0.734135	0.0553435	1.57654	0.0553435	1.57654	2.57397	0.460109	2.75118	4.50075	2.18882	1.63308	0.616332
207	-0.79288	2.09517	1.57516	-0.655145	-0.199151	-0.79288	-0.0745841	-0.829727	0.146592	-0.272025	4.82326	0.661432	1.7567	1.52192	1.75645	1.43454	6.24234	0.734135	0.12872	1.57542	-0.79288	2.09517	1.53528	-0.655145	-0.199151	-0.79288	-0.0745841	0.146592	-0.272025	4.82326	0.661432	1.7567	1.52192	1.79097	1.68986	0.326026	-0.206251	0.773782	0.12872	1.57542	0.12872	1.57542	2.54549	0.448301	2.41266	4.34647	2.09651	1.61401	0.600343
208	-0.787484	2.23688	1.53528	-0.624921	-0.228716	-0.787484	-0.150059	-0.808813	0.116936	-0.280011	4.92439	0.695731	1.83738	1.53598	1.74394	1.49194	6.30006	0.773782	0.0903592	1.60744	-0.787484	2.23688	1.61754	-0.624921	-0.228716	-0.787484	-0.150059	0.116936	-0.280011	4.92439	0.695731	1.83738	1.53598	1.7112	1.69638	0.329771	-0.20815	0.816923	0.0903592	1.60744	0.0903592	1.60744	2.54326	0.453268	2.44876	4.48908	2.23078	1.63009	0.610482
209	-0.785044	2.07585	1.61754	-0.613861	-0.190434	-0.785044	-0.0470664	-0.828963	0.205606	-0.244739	4.95229	0.640714	1.81182	1.5865	1.68986	1.42172	6.3904	0.816923	0.0881579	1.59188	-0.785044	2.07585	1.65943	-0.613861	-0.190434	-0.785044	-0.0470664	0.205606	-0.244739	4.95229	0.640714	1.81182	1.5865	1.7483	1.73056	0.349069	-0.175215	0.803499	0.0881579	1.59188	0.0881579	1.59188	2.54087	0.461744	2.50343	4.27282	2.15443	1.58842	0.615328
210	-0.807599	2.12431	1.65943	-0.64957	-0.170629	-0.807599	-0.024515	-0.853305	0.114345	-0.251279	4.91445	0.628206	1.77951	1.56401	1.69638	1.416	6.43559	0.803499	0.0970819	1.55462	-0.807599	2.12431	1.6205	-0.64957	-0.170629	-0.807599	-0.024515	0.114345	-0.251279	4.91445	0.628206	1.77951	1.56401	1.79322	1.79097	0.328422	-0.213057	0.696818	0.0970819	1.55462	0.0970819	1.55462	2.54315	0.461146	2.44397	4.40329	2.16961	1.63426	0.617617
211	-0.798476	2.08198	1.6205	-0.667083	-0.180266	-0.798476	-0.0706837	-0.806404	0.119886	-0.263224	4.92967	0.626859	1.74907	1.57064	1.73056	1.48191	6.29146	0.696818	0.114478	1.60003	-0.798476	2.08198	1.65231	-0.667083	-0.180266	-0.798476	-0.0706837	0.119886	-0.263224	4.92967	0.626859	1.74907	1.57064	1.75295	1.7112	0.340853	-0.183649	0.826442	0.114478	1.60003	0.114478	1.60003	2.54883	0.458478	2.35971	4.29294	2.20293	1.60465	0.612942
212	-0.813303	2.28183	1.65231	-0.630122	-0.174783	-0.813303	-0.0562631	-0.828963	0.0322157	-0.255517	4.95686	0.684459	1.88554	1.5547	1.79097	1.42731	6.27528	0.826442	0.119521	1.57938	-0.813303	2.28183	1.66288	-0.630122	-0.174783	-0.813303	-0.0562631	0.0322157	-0.255517	4.95686	0.684459	1.88554	1.5547	1.79452	1.7483	0.360275	-0.196729	0.681969	0.119521	1.57938	0.119521	1.57938	2.51807	0.457129	2.51822	4.34357	2.22793	1.63299	0.612544
213	-0.795761	2.28901	1.66288	-0.523451	-0.209385	-0.795761	-0.0929346	-0.825397	0.0158265	-0.265176	4.95151	0.683501	1.92066	1.63333	1.7112	1.46411	6.23272	0.681969	0.108783	1.58177	-0.795761	2.28901	1.77557	-0.523451	-0.209385	-0.795761	-0.0929346	0.0158265	-0.265176	4.95151	0.683501	1.92066	1.63333	1.74724	1.79322	0.354243	-0.196246	0.658757	0.108783	1.58177	0.108783	1.58177	2.50108	0.467797	2.64672	4.29745	2.18463	1.59542	0.624784
214	-0.797695	2.19043	1.77557	-0.599488	-0.249783	-0.797695	-0.090587	-0.847668	0.00173951	-0.266261	4.90901	0.655107	1.83032	1.60385	1.7483	1.4312	6.35593	0.658757	0.113938	1.59252	-0.797695	2.19043	1.62641	-0.599488	-0.249783	-0.797695	-0.090587	0.00173951	-0.266261	4.90901	0.655107	1.83032	1.60385	1.71153	1.75295	0.345108	-0.212277	0.720711	0.113938	1.59252	0.113938	1.59252	2.53739	0.457013	2.71011	4.62771	2.18179	1.61845	0.618535
215	-0.808355	2.11463	1.62641	-0.620234	-0.180825	-0.808355	-0.0886834	-0.855299	0.066313	-0.238874	4.9853	0.617686	1.78096	1.61414	1.79322	1.38595	6.3403	0.720711	0.126721	1.58266	-0.808355	2.11463	1.70174	-0.620234	-0.180825	-0.808355	-0.0886834	0.066313	-0.238874	4.9853	0.617686	1.78096	1.61414	1.82563	1.79452	0.342963	-0.198931	0.641231	0.126721	1.58266	0.126721	1.58266	2.51468	0.456241	2.38774	4.30022	2.0977	1.60206	0.611472
216	-0.799222	2.07376	1.70174	-0.663851	-0.233962	-0.799222	-0.135752	-0.816263	0.0560717	-0.274272	4.90442	0.640077	1.81226	1.5595	1.75295	1.43427	6.34523	0.641231	0.150337	1.61927	-0.799222	2.07376	1.67151	-0.663851	-0.233962	-0.799222	-0.135752	0.0560717	-0.274272	4.90442	0.640077	1.81226	1.5595	1.71785	1.74724	0.359735	-0.19989	0.595516	0.150337	1.61927	0.150337	1.61927	2.50384	0.455562	2.47466	4.65935	2.18382	1.59172	0.614934
217	-0.815527	2.28157	1.67151	-0.600285	-0.224135	-0.815527	-0.071232	-0.8339	0.0626222	-0.250139	4.99076	0.679313	1.90642	1.63237	1.79452	1.46373	6.35098	0.595516	0.137891	1.61395	-0.815527	2.28157	1.71056	-0.600285	-0.224135	-0.815527	-0.071232	0.0626222	-0.250139	4.99076	0.679313	1.90642	1.63237	1.76513	1.71153	0.344267	-0.167358	0.578431	0.137891	1.61395	0.137891	1.61395	2.50173	0.465536	2.57604	4.38375	2.07941	1.66607	0.622487
218	-0.833808	2.21418	1.71056	-0.59917	-0.215702	-0.833808	-0.130839	-0.859462	-0.0703859	-0.281902	4.96457	0.649391	1.85773	1.64872	1.74724	1.51664	6.35508	0.578431	0.14145	1.57236	-0.833808	2.21418	1.6553	-0.59917	-0.215702	-0.833808	-0.130839	-0.0703859	-0.281902	4.96457	0.649391	1.85773	1.64872	1.8007	1.82563	0.381453	-0.167828	0.572005	0.14145	1.57236	0.14145	1.57236	2.51778	0.457463	2.45693	4.59625	2.11181	1.6001	0.616031
219	-0.769594	2.22364	1.6553	-0.599306	-0.228261	-0.769594	-0.191727	-0.855896	0.0587043	-0.309681	4.91514	0.655573	1.84223	1.60597	1.71153	1.45317	6.15025	0.572005	0.143486	1.54953	-0.769594	2.22364	1.72242	-0.599306	-0.228261	-0.769594	-0.191727	0.0587043	-0.309681	4.91514	0.655573	1.84223	1.60597	1.78445	1.71785	0.330051	-0.186489	0.514808	0.143486	1.54953	0.143486	1.54953	2.50331	0.446525	2.65713	4.39612	2.07636	1.64235	0.604014
220	-0.829109	2.10871	1.72242	-0.65906	-0.261165	-0.829109	-0.12552	-0.841168	-0.00130604	-0.268985	4.98917	0.649391	1.80493	1.60898	1.82563	1.43574	6.312	0.514808	0.109801	1.58669	-0.829109	2.10871	1.80261	-0.65906	-0.261165	-0.829109	-0.12552	-0.00130604	-0.268985	4.98917	0.649391	1.80493	1.60898	1.67576	1.76513	0.330671	-0.219931	0.484812	0.109801	1.58669	0.109801	1.58669	2.50801	0.454651	2.34413	4.44333	2.13099	1.60851	0.608258
221	-0.778934	2.06356	1.80261	-0.680192	-0.252818	-0.778934	-0.238433	-0.888187	0.000165116	-0.318344	4.9089	0.609971	1.77018	1.58876	1.71785	1.43234	6.19924	0.484812	0.0961082	1.52076	-0.778934	2.06356	1.73825	-0.680192	-0.252818	-0.778934	-0.238433	0.000165116	-0.318344	4.9089	0.609971	1.77018	1.58876	1.62686	1.8007	0.331568	-0.214151	0.475984	0.0961082	1.52076	0.0961082	1.52076	2.47362	0.439076	2.53672	4.54601	2.13373	1.57017	0.597116
222	-0.829109	2.24035	1.73825	-0.637541	-0.214478	-0.829109	-0.152521	-0.864703	0.0771634	-0.30047	4.94207	0.620793	1.85381	1.65335	1.76513	1.50486	6.12144	0.475984	0.0747964	1.54344	-0.829109	2.24035	1.72606	-0.637541	-0.214478	-0.829109	-0.152521	0.0771634	-0.30047	4.94207	0.620793	1.85381	1.65335	1.6888	1.78445	0.330435	-0.206171	0.556036	0.0747964	1.54344	0.0747964	1.54344	2.48778	0.449988	2.35459	4.60479	2.19959	1.58543	0.607218
223	-0.791411	2.19775	1.72606	-0.598044	-0.270233	-0.791411	-0.214144	-0.840404	-0.0075262	-0.30157	4.92247	0.646547	1.82256	1.61502	1.8007	1.4787	6.02132	0.556036	0.137432	1.55406	-0.791411	2.19775	1.7404	-0.598044	-0.270233	-0.791411	-0.214144	-0.0075262	-0.30157	4.92247	0.646547	1.82256	1.61502	1.63683	1.67576	0.34811	-0.192596	0.579057	0.137432	1.55406	0.137432	1.55406	2.55138	0.444165	2.34352	4.51297	2.18996	1.59357	0.600194
224	-0.775289	2.15148	1.7404	-0.634913	-0.294752	-0.775289	-0.184134	-0.858208	-0.074962	-0.287889	4.98357	0.622007	1.81808	1.62285	1.78445	1.40469	6.24979	0.579057	0.114441	1.5188	-0.775289	2.15148	1.81666	-0.634913	-0.294752	-0.775289	-0.184134	-0.074962	-0.287889	4.98357	0.622007	1.81808	1.62285	1.73962	1.62686	0.358188	-0.200063	0.537472	0.114441	1.5188	0.114441	1.5188	2.45011	0.445096	2.17656	4.342	2.15647	1.60051	0.600527
225	-0.817719	2.15062	1.81666	-0.612096	-0.307017	-0.817719	-0.165266	-0.850048	-0.0182424	-0.290158	4.97246	0.641954	1.82957	1.67048	1.67576	1.4471	6.2041	0.537472	0.132866	1.5806	-0.817719	2.15062	1.7546	-0.612096	-0.307017	-0.817719	-0.165266	-0.0182424	-0.290158	4.97246	0.641954	1.82957	1.67048	1.66742	1.6888	0.33845	-0.177406	0.412796	0.132866	1.5806	0.132866	1.5806	2.49374	0.449522	2.28197	4.5566	2.18332	1.57823	0.60688
226	-0.80197	2.15574	1.7546	-0.60717	-0.304314	-0.80197	-0.165462	-0.878078	0.0130597	-0.281197	4.9674	0.613617	1.83364	1.61651	1.62686	1.43778	6.1941	0.412796	0.0800586	1.55875	-0.80197	2.15574	1.74449	-0.60717	-0.304314	-0.80197	-0.165462	0.0130597	-0.281197	4.9674	0.613617	1.83364	1.61651	1.66272	1.63683	0.378965	-0.213774	0.44126	0.0800586	1.55875	0.0800586	1.55875	2.42236	0.440916	2.29477	4.6201	2.15474	1.61961	0.596684
227	-0.807441	2.17463	1.74449	-0.598715	-0.327828	-0.807441	-0.214165	-0.851136	-0.002261	-0.311697	4.92295	0.632111	1.77162	1.62155	1.6888	1.44103	6.2699	0.44126	0.139752	1.55556	-0.807441	2.17463	1.74355	-0.598715	-0.327828	-0.807441	-0.214165	-0.002261	-0.311697	4.92295	0.632111	1.77162	1.62155	1.68717	1.73962	0.364566	-0.201183	0.381083	0.139752	1.55556	0.139752	1.55556	2.49985	0.44457	2.31356	4.50418	2.08629	1.58767	0.600531
228	-0.797952	2.06167	1.74355	-0.606476	-0.303318	-0.797952	-0.17203	-0.874224	-0.0323397	-0.299204	5.034	0.628925	1.81061	1.69609	1.63683	1.40942	6.22761	0.381083	0.123465	1.51687	-0.797952	2.06167	1.72506	-0.606476	-0.303318	-0.797952	-0.17203	-0.0323397	-0.299204	5.034	0.628925	1.81061	1.69609	1.77855	1.66742	0.350146	-0.202965	0.404266	0.123465	1.51687	0.123465	1.51687	2.46173	0.439673	2.41022	4.51284	2.18066	1.55554	0.597853
229	-0.801622	2.23831	1.72506	-0.606919	-0.316085	-0.801622	-0.223548	-0.866093	-0.0121849	-0.330013	4.87242	0.628407	1.85913	1.70796	1.73962	1.42723	6.07922	0.404266	0.0987032	1.49989	-0.801622	2.23831	1.59843	-0.606919	-0.316085	-0.801622	-0.223548	-0.0121849	-0.330013	4.87242	0.628407	1.85913	1.70796	1.74638	1.66272	0.353882	-0.154086	0.437702	0.0987032	1.49989	0.0987032	1.49989	2.47709	0.436877	2.36978	4.3282	2.08839	1.56622	0.590786
230	-0.833584	2.18032	1.59843	-0.59876	-0.291698	-0.833584	-0.258047	-0.86577	-0.0884631	-0.34088	4.82663	0.625064	1.83249	1.66448	1.66742	1.42308	6.1956	0.437702	0.0966044	1.50203	-0.833584	2.18032	1.75611	-0.59876	-0.291698	-0.833584	-0.258047	-0.0884631	-0.34088	4.82663	0.625064	1.83249	1.66448	1.6992	1.68717	0.343261	-0.199067	0.461106	0.0966044	1.50203	0.0966044	1.50203	2.44605	0.436185	2.06083	4.36974	2.13979	1.62763	0.591661
231	-0.811791	2.26672	1.75611	-0.605122	-0.283845	-0.811791	-0.191448	-0.861857	-0.121654	-0.321852	4.89861	0.631161	1.91784	1.65649	1.66272	1.47189	6.1412	0.461106	0.155031	1.52991	-0.811791	2.26672	1.70245	-0.605122	-0.283845	-0.811791	-0.191448	-0.121654	-0.321852	4.89861	0.631161	1.91784	1.65649	1.67332	1.77855	0.349825	-0.196004	0.348572	0.155031	1.52991	0.155031	1.52991	2.45419	0.438194	2.26732	4.49326	2.08658	1.57114	0.592265
232	-0.809658	2.1833	1.70245	-0.61798	-0.317413	-0.809658	-0.238909	-0.868004	-0.131168	-0.313015	4.96541	0.626942	1.84776	1.68674	1.68717	1.49878	6.12935	0.348572	0.110325	1.5051	-0.809658	2.1833	1.79124	-0.61798	-0.317413	-0.809658	-0.238909	-0.131168	-0.313015	4.96541	0.626942	1.84776	1.68674	1.57451	1.74638	0.36533	-0.219003	0.339195	0.110325	1.5051	0.110325	1.5051	2.43913	0.435779	2.5475	4.62102	2.1944	1.50551	0.59161
233	-0.808886	2.15685	1.79124	-0.584934	-0.339105	-0.808886	-0.279915	-0.85809	-0.0507344	-0.363447	4.83432	0.604875	1.83394	1.69716	1.77855	1.45843	6.09766	0.339195	0.127795	1.51483	-0.808886	2.15685	1.80032	-0.584934	-0.339105	-0.808886	-0.279915	-0.0507344	-0.363447	4.83432	0.604875	1.83394	1.69716	1.62346	1.6992	0.365847	-0.181013	0.278797	0.127795	1.51483	0.127795	1.51483	2.42189	0.4285	2.00841	4.41438	2.0763	1.5923	0.580975
234	-0.805424	2.19791	1.80032	-0.586493	-0.321606	-0.805424	-0.200365	-0.872118	-0.10836	-0.306696	5.00547	0.63133	1.88796	1.64892	1.74638	1.45573	6.05815	0.278797	0.154153	1.51193	-0.805424	2.19791	1.75879	-0.586493	-0.321606	-0.805424	-0.200365	-0.10836	-0.306696	5.00547	0.63133	1.88796	1.64892	1.5841	1.67332	0.375459	-0.190126	0.307178	0.154153	1.51193	0.154153	1.51193	2.42198	0.440737	1.96853	4.22041	2.00806	1.60269	0.589667
235	-0.816374	2.17054	1.75879	-0.658878	-0.284603	-0.816374	-0.246741	-0.876359	-0.111968	-0.31638	4.98111	0.61016	1.86846	1.68926	1.6992	1.43085	6.19497	0.307178	0.117313	1.5401	-0.816374	2.17054	1.7356	-0.658878	-0.284603	-0.816374	-0.246741	-0.111968	-0.31638	4.98111	0.61016	1.86846	1.68926	1.60644	1.57451	0.400276	-0.196407	0.223651	0.117313	1.5401	0.117313	1.5401	2.50102	0.433275	2.04561	4.45625	2.00551	1.56199	0.586145
236	-0.821073	2.17156	1.7356	-0.651243	-0.32282	-0.821073	-0.174172	-0.878803	-0.125255	-0.293106	4.94784	0.60048	1.83226	1.665	1.67332	1.42574	6.19698	0.223651	0.131143	1.55104	-0.821073	2.17156	1.76484	-0.651243	-0.32282	-0.821073	-0.174172	-0.125255	-0.293106	4.94784	0.60048	1.83226	1.665	1.65558	1.62346	0.371203	-0.193623	0.256515	0.131143	1.55104	0.131143	1.55104	2.45226	0.433774	2.16249	4.44539	2.06095	1.55958	0.585753
237	-0.776501	2.22417	1.76484	-0.59125	-0.355326	-0.776501	-0.213358	-0.886806	-0.112482	-0.296212	4.96315	0.622267	1.89853	1.70954	1.57451	1.43261	6.04268	0.256515	0.182846	1.56279	-0.776501	2.22417	1.7572	-0.59125	-0.355326	-0.776501	-0.213358	-0.112482	-0.296212	4.96315	0.622267	1.89853	1.70954	1.68833	1.5841	0.365983	-0.19225	0.273766	0.182846	1.56279	0.182846	1.56279	2.45913	0.441632	2.13882	4.41787	2.07361	1.58952	0.594678
238	-0.798916	2.06302	1.7572	-0.616011	-0.285628	-0.798916	-0.303036	-0.880875	-0.0756511	-0.349218	4.87045	0.59444	1.87257	1.70856	1.62346	1.44951	6.07459	0.273766	0.170375	1.5615	-0.798916	2.06302	1.83411	-0.616011	-0.285628	-0.798916	-0.303036	-0.0756511	-0.349218	4.87045	0.59444	1.87257	1.70856	1.66033	1.60644	0.337441	-0.173861	0.205088	0.170375	1.5615	0.170375	1.5615	2.44327	0.43174	2.11699	4.59871	2.08498	1.57891	0.586801
239	-0.776609	2.08349	1.83411	-0.648477	-0.316389	-0.776609	-0.28546	-0.845601	-0.0967506	-0.311385	4.89824	0.593301	1.7714	1.6897	1.5841	1.47795	6.07804	0.205088	0.13801	1.52788	-0.776609	2.08349	1.70637	-0.648477	-0.316389	-0.776609	-0.28546	-0.0967506	-0.311385	4.89824	0.593301	1.7714	1.6897	1.64354	1.65558	0.377301	-0.172437	0.239615	0.13801	1.52788	0.13801	1.52788	2.40634	0.432189	2.14187	4.64907	2.06587	1.56327	0.586679
240	-0.7832	2.11727	1.70637	-0.617741	-0.349321	-0.7832	-0.223403	-0.878069	-0.132554	-0.337809	4.93803	0.623713	1.87143	1.6887	1.60644	1.38511	6.18072	0.239615	0.167146	1.53992	-0.7832	2.11727	1.76985	-0.617741	-0.349321	-0.7832	-0.223403	-0.132554	-0.337809	4.93803	0.623713	1.87143	1.6887	1.65923	1.68833	0.360006	-0.161449	0.183515	0.167146	1.53992	0.167146	1.53992	2.41184	0.435828	2.18725	4.52596	2.07398	1.5542	0.589757
241	-0.788048	2.31083	1.76985	-0.647624	-0.307804	-0.788048	-0.23924	-0.858453	-0.187013	-0.321651	4.97601	0.655985	1.93764	1.71345	1.65558	1.44767	6.11378	0.183515	0.132389	1.54047	-0.788048	2.31083	1.82946	-0.647624	-0.307804	-0.788048	-0.23924	-0.187013	-0.321651	4.97601	0.655985	1.93764	1.71345	1.68775	1.66033	0.361641	-0.183977	0.0982897	0.132389	1.54047	0.132389	1.54047	2.38959	0.437698	2.06549	4.57341	2.11263	1.52468	0.592337
242	-0.79586	2.13899	1.82946	-0.639635	-0.331129	-0.79586	-0.327812	-0.865697	-0.225593	-0.305541	4.97288	0.600714	1.88477	1.70232	1.68833	1.4671	6.14307	0.0982897	0.116798	1.56759	-0.79586	2.13899	1.89809	-0.639635	-0.331129	-0.79586	-0.327812	-0.225593	-0.305541	4.97288	0.600714	1.88477	1.70232	1.52058	1.64354	0.385092	-0.14663	0.133591	0.116798	1.56759	0.116798	1.56759	2.42868	0.42738	2.22889	4.36102	2.11352	1.54617	0.581444
243	-0.800003	2.07613	1.89809	-0.627072	-0.371877	-0.800003	-0.273957	-0.880674	-0.211413	-0.343509	4.85234	0.571686	1.84702	1.71439	1.66033	1.43517	6.15136	0.133591	0.129307	1.51997	-0.800003	2.07613	1.74592	-0.627072	-0.371877	-0.800003	-0.273957	-0.211413	-0.343509	4.85234	0.571686	1.84702	1.71439	1.54479	1.65923	0.380975	-0.133563	0.124786	0.129307	1.51997	0.129307	1.51997	2.43822	0.427954	2.13269	4.35886	2.13684	1.5203	0.580948
244	-0.857584	2.05784	1.74592	-0.61328	-0.361681	-0.857584	-0.306626	-0.849416	-0.11785	-0.343497	4.89573	0.593741	1.80697	1.70254	1.64354	1.41139	6.10542	0.124786	0.133269	1.48181	-0.857584	2.05784	1.85181	-0.61328	-0.361681	-0.857584	-0.306626	-0.11785	-0.343497	4.89573	0.593741	1.80697	1.70254	1.68137	1.68775	0.364932	-0.18324	0.0923336	0.133269	1.48181	0.133269	1.48181	2.38797	0.424723	2.07932	4.46348	2.06079	1.54727	0.579245
245	-0.813087	2.27156	1.85181	-0.614555	-0.375415	-0.813087	-0.26803	-0.876825	-0.136709	-0.313772	4.99179	0.608776	1.90455	1.70939	1.65923	1.45341	6.16237	0.0923336	0.110625	1.50331	-0.813087	2.27156	1.77366	-0.614555	-0.375415	-0.813087	-0.26803	-0.136709	-0.313772	4.99179	0.608776	1.90455	1.70939	1.73272	1.52058	0.391041	-0.160261	0.0712256	0.110625	1.50331	0.110625	1.50331	2.43002	0.436591	2.18839	4.35298	2.08325	1.56935	0.589827
246	-0.806429	2.23546	1.77366	-0.559342	-0.361367	-0.806429	-0.206645	-0.896504	-0.186951	-0.306626	4.97806	0.605686	1.90256	1.71811	1.68775	1.45575	6.18594	0.0712256	0.127821	1.55734	-0.806429	2.23546	1.8866	-0.559342	-0.361367	-0.806429	-0.206645	-0.186951	-0.306626	4.97806	0.605686	1.90256	1.71811	1.75055	1.54479	0.384322	-0.156141	0.0355724	0.127821	1.55734	0.127821	1.55734	2.38889	0.431212	2.24158	4.37666	2.14062	1.56366	0.586034
247	-0.770191	2.13496	1.8866	-0.62367	-0.406641	-0.770191	-0.359094	-0.855166	-0.151258	-0.365971	4.92591	0.637568	1.88703	1.69255	1.52058	1.48793	6.05694	0.0355724	0.11268	1.4987	-0.770191	2.13496	1.75776	-0.62367	-0.406641	-0.770191	-0.359094	-0.151258	-0.365971	4.92591	0.637568	1.88703	1.69255	1.66267	1.68137	0.356893	-0.141854	0.0224465	0.11268	1.4987	0.11268	1.4987	2.36301	0.429144	2.15639	4.56603	2.01382	1.54122	0.582758
248	-0.809076	2.23074	1.75776	-0.557475	-0.36739	-0.809076	-0.295174	-0.865932	-0.106971	-0.351474	4.86773	0.608164	1.88249	1.68944	1.54479	1.4136	6.05386	0.0224465	0.152014	1.54878	-0.809076	2.23074	1.81714	-0.557475	-0.36739	-0.809076	-0.295174	-0.106971	-0.351474	4.86773	0.608164	1.88249	1.68944	1.73267	1.73272	0.367939	-0.154575	0.0295576	0.152014	1.54878	0.152014	1.54878	2.39672	0.428594	2.08859	4.56737	2.04569	1.57015	0.584577
249	-0.828976	2.13974	1.81714	-0.621519	-0.352812	-0.828976	-0.314932	-0.864032	-0.214931	-0.319408	5.00144	0.597093	1.8653	1.6918	1.68137	1.41101	6.06017	0.0295576	0.15395	1.55316	-0.828976	2.13974	1.88449	-0.621519	-0.352812	-0.828976	-0.314932	-0.214931	-0.319408	5.00144	0.597093	1.8653	1.6918	1.76772	1.75055	0.336815	-0.154544	0.00431894	0.15395	1.55316	0.15395	1.55316	2.36905	0.427795	2.13095	4.26814	2.02975	1.52829	0.58126
250	-0.819762	2.21679	1.88449	-0.636357	-0.375453	-0.819762	-0.263933	-0.870756	-0.177481	-0.324641	4.91257	0.592456	1.81499	1.71734	1.73272	1.46085	6.11843	0.00431894	0.119174	1.4836	-0.819762	2.21679	1.79187	-0.636357	-0.375453	-0.819762	-0.263933	-0.177481	-0.324641	4.91257	0.592456	1.81499	1.71734	1.563	1.66267	0.365829	-0.149705	0.0231562	0.119174	1.4836	0.119174	1.4836	2.40274	0.427091	2.06646	4.42481	2.06158	1.58125	0.581016
251	-0.824153	2.10708	1.79187	-0.600012	-0.357128	-0.824153	-0.202971	-0.887849	-0.161851	-0.30111	5.05604	0.597284	1.86893	1.76962	1.75055	1.46263	6.19239	0.0231562	0.161791	1.51181	-0.824153	2.10708	1.8744	-0.600012	-0.357128	-0.824153	-0.202971	-0.161851	-0.30111	5.05604	0.597284	1.86893	1.76962	1.73507	1.73267	0.386538	-0.168843	-0.0280503	0.161791	1.51181	0.161791	1.51181	2.37843	0.438357	2.21139	4.36324	2.0753	1.56304	0.591051
252	-0.808172	2.15259	1.8744	-0.603892	-0.408272	-0.808172	-0.272384	-0.879749	-0.190982	-0.325671	4.95465	0.604036	1.88049	1.69072	1.66267	1.47472	5.9988	-0.0280503	0.157728	1.55416	-0.808172	2.15259	1.76546	-0.603892	-0.408272	-0.808172	-0.272384	-0.190982	-0.325671	4.95465	0.604036	1.88049	1.69072	1.73373	1.76772	0.362412	-0.138878	-0.137198	0.157728	1.55416	0.157728	1.55416	2.36127	0.429886	2.13395	4.54213	2.08829	1.54159	0.582836
253	-0.791361	2.22818	1.76546	-0.599056	-0.405683	-0.791361	-0.287157	-0.854162	-0.155927	-0.3071	5.01221	0.615402	1.9242	1.71322	1.73267	1.47942	6.10332	-0.137198	0.15583	1.48027	-0.791361	2.22818	1.86664	-0.599056	-0.405683	-0.791361	-0.287157	-0.155927	-0.3071	5.01221	0.615402	1.9242	1.71322	1.72083	1.563	0.370522	-0.139137	-0.0632386	0.15583	1.48027	0.15583	1.48027	2.40898	0.426422	2.11403	4.51115	2.05221	1.51529	0.579914
254	-0.836863	2.13824	1.86664	-0.587858	-0.369079	-0.836863	-0.275561	-0.898443	-0.180452	-0.319193	5.01783	0.602189	1.905	1.73081	1.76772	1.47039	5.81348	-0.0632386	0.0902125	1.52729	-0.836863	2.13824	1.82386	-0.587858	-0.369079	-0.836863	-0.275561	-0.180452	-0.319193	5.01783	0.602189	1.905	1.73081	1.66435	1.73507	0.369306	-0.180641	-0.0353229	0.0902125	1.52729	0.0902125	1.52729	2.33792	0.421961	2.11276	4.58791	2.10888	1.54232	0.575255
255	-0.7856	1.98716	1.82386	-0.589895	-0.413243	-0.7856	-0.298588	-0.860476	-0.110427	-0.317755	4.92692	0.555035	1.80991	1.69075	1.563	1.49213	5.97664	-0.0353229	0.128236	1.49015	-0.7856	1.98716	1.94022	-0.589895	-0.413243	-0.7856	-0.298588	-0.110427	-0.317755	4.92692	0.555035	1.80991	1.69075	1.77668	1.73373	0.390903	-0.15387	-0.148405	0.128236	1.49015	0.128236	1.49015	2.36856	0.425551	1.94898	4.47128	2.03983	1.545	0.576999
256	-0.763567	2.15322	1.94022	-0.656284	-0.370359	-0.763567	-0.334008	-0.851743	-0.179177	-0.345271	4.96586	0.597162	1.89273	1.73006	1.73507	1.41002	5.86131	-0.148405	0.159764	1.50473	-0.763567	2.15322	1.7907	-0.656284	-0.370359	-0.763567	-0.334008	-0.179177	-0.345271	4.96586	0.597162	1.89273	1.73006	1.56919	1.72083	0.392313	-0.153647	-0.128584	0.159764	1.50473	0.159764	1.50473	2.35592	0.418124	2.12941	4.47879	2.06239	1.49109	0.571333
257	-0.793179	1.99415	1.7907	-0.593993	-0.402135	-0.793179	-0.374642	-0.892003	-0.199001	-0.338661	4.95536	0.550355	1.84507	1.65558	1.73373	1.47709	6.02934	-0.128584	0.164167	1.52377	-0.793179	1.99415	1.69763	-0.593993	-0.402135	-0.793179	-0.374642	-0.199001	-0.338661	4.95536	0.550355	1.84507	1.65558	1.63545	1.66435	0.395167	-0.170804	-0.0894071	0.164167	1.52377	0.164167	1.52377	2.32429	0.412415	2.10642	4.43296	2.0744	1.51314	0.56342
258	-0.797978	2.06446	1.69763	-0.61072	-0.403121	-0.797978	-0.319526	-0.896059	-0.184411	-0.341333	4.8758	0.558319	1.88132	1.74551	1.72083	1.50016	5.90322	-0.0894071	0.153225	1.53133	-0.797978	2.06446	1.91151	-0.61072	-0.403121	-0.797978	-0.319526	-0.184411	-0.341333	4.8758	0.558319	1.88132	1.74551	1.68296	1.77668	0.340726	-0.164653	-0.108763	0.153225	1.53133	0.153225	1.53133	2.29303	0.42049	2.1268	4.50082	2.0406	1.49302	0.573335
259	-0.794316	2.05891	1.91151	-0.591215	-0.429035	-0.794316	-0.357967	-0.896377	-0.266138	-0.351014	4.87592	0.548356	1.86196	1.67503	1.66435	1.52324	5.88807	-0.108763	0.147677	1.53992	-0.794316	2.05891	1.8578	-0.591215	-0.429035	-0.794316	-0.357967	-0.266138	-0.351014	4.87592	0.548356	1.86196	1.67503	1.69187	1.56919	0.34937	-0.151036	-0.110951	0.147677	1.53992	0.147677	1.53992	2.37426	0.417106	1.999	4.40491	2.10717	1.44408	0.568188
260	-0.818151	1.98067	1.8578	-0.557396	-0.43152	-0.818151	-0.357563	-0.858012	-0.225572	-0.351161	4.93204	0.55932	1.88437	1.75507	1.77668	1.51132	5.94961	-0.110951	0.16289	1.48593	-0.818151	1.98067	1.80007	-0.557396	-0.43152	-0.818151	-0.357563	-0.225572	-0.351161	4.93204	0.55932	1.88437	1.75507	1.59177	1.63545	0.399715	-0.147335	-0.179086	0.16289	1.48593	0.16289	1.48593	2.34383	0.417417	1.8999	4.56783	1.99503	1.50552	0.568862
261	-0.762405	1.96178	1.80007	-0.600422	-0.414305	-0.762405	-0.382038	-0.90124	-0.249542	-0.360747	4.9081	0.534702	1.81387	1.66583	1.56919	1.49295	5.85845	-0.179086	0.147237	1.46449	-0.762405	1.96178	1.78491	-0.600422	-0.414305	-0.762405	-0.382038	-0.249542	-0.360747	4.9081	0.534702	1.81387	1.66583	1.52954	1.68296	0.356778	-0.131477	-0.188654	0.147237	1.46449	0.147237	1.46449	2.31611	0.408838	2.0946	4.36162	2.02286	1.53186	0.560388
262	-0.809741	2.04261	1.78491	-0.617775	-0.428097	-0.809741	-0.335622	-0.889148	-0.146633	-0.370801	4.86316	0.561118	1.80601	1.66855	1.63545	1.57538	5.79025	-0.188654	0.131224	1.49084	-0.809741	2.04261	1.89989	-0.617775	-0.428097	-0.809741	-0.335622	-0.146633	-0.370801	4.86316	0.561118	1.80601	1.66855	1.69278	1.69187	0.37769	-0.119548	-0.163718	0.131224	1.49084	0.131224	1.49084	2.32439	0.414524	1.97516	4.66899	2.04513	1.50503	0.56821
263	-0.811866	1.96495	1.89989	-0.6259	-0.442134	-0.811866	-0.361784	-0.885406	-0.219763	-0.361458	4.92332	0.551263	1.85682	1.7603	1.68296	1.54622	5.96197	-0.163718	0.157085	1.47397	-0.811866	1.96495	1.82157	-0.6259	-0.442134	-0.811866	-0.361784	-0.219763	-0.361458	4.92332	0.551263	1.85682	1.7603	1.67792	1.59177	0.348535	-0.136192	-0.208093	0.157085	1.47397	0.157085	1.47397	2.3209	0.410823	1.99149	4.50378	2.17932	1.51633	0.561913
264	-0.791419	1.96664	1.82157	-0.633445	-0.432223	-0.791419	-0.369325	-0.868552	-0.278446	-0.352445	4.90166	0.558613	1.82119	1.69618	1.69187	1.5392	5.87565	-0.208093	0.148364	1.46542	-0.791419	1.96664	1.88343	-0.633445	-0.432223	-0.791419	-0.369325	-0.278446	-0.352445	4.90166	0.558613	1.82119	1.69618	1.7295	1.52954	0.353254	-0.146222	-0.228981	0.148364	1.46542	0.148364	1.46542	2.29467	0.406761	1.97153	4.33056	2.00421	1.49548	0.556819
265	-0.827142	1.97698	1.88343	-0.599454	-0.414997	-0.827142	-0.308084	-0.886532	-0.226499	-0.328812	4.92298	0.545535	1.85701	1.69741	1.59177	1.48557	5.79593	-0.228981	0.167898	1.47441	-0.827142	1.97698	1.95618	-0.599454	-0.414997	-0.827142	-0.308084	-0.226499	-0.328812	4.92298	0.545535	1.85701	1.69741	1.67414	1.69278	0.37455	-0.0975841	-0.222721	0.167898	1.47441	0.167898	1.47441	2.31316	0.413363	1.90541	4.41926	1.99777	1.45545	0.56182
266	-0.79713	1.99469	1.95618	-0.625911	-0.410444	-0.79713	-0.351398	-0.87657	-0.160986	-0.34673	4.94788	0.557859	1.81102	1.70195	1.52954	1.52834	6.02523	-0.222721	0.177179	1.50348	-0.79713	1.99469	1.83137	-0.625911	-0.410444	-0.79713	-0.351398	-0.160986	-0.34673	4.94788	0.557859	1.81102	1.70195	1.71134	1.67792	0.384437	-0.135104	-0.255937	0.177179	1.50348	0.177179	1.50348	2.26867	0.419233	1.87544	4.4972	2.04361	1.46645	0.568918
267	-0.828902	2.05896	1.83137	-0.544673	-0.4249	-0.828902	-0.296188	-0.887854	-0.267722	-0.325218	4.93963	0.54973	1.85491	1.73082	1.69278	1.54026	5.93261	-0.255937	0.149144	1.52612	-0.828902	2.05896	1.87562	-0.544673	-0.4249	-0.828902	-0.296188	-0.267722	-0.325218	4.93963	0.54973	1.85491	1.73082	1.68271	1.7295	0.368653	-0.150021	-0.278029	0.149144	1.52612	0.149144	1.52612	2.32997	0.41681	1.96979	4.42639	2.085	1.4754	0.567839
268	-0.802129	1.86368	1.87562	-0.632387	-0.406422	-0.802129	-0.321646	-0.891548	-0.257675	-0.323094	5.03433	0.526303	1.78717	1.71366	1.67792	1.51098	5.93069	-0.278029	0.17143	1.50047	-0.802129	1.86368	1.92101	-0.632387	-0.406422	-0.802129	-0.321646	-0.257675	-0.323094	5.03433	0.526303	1.78717	1.71366	1.68736	1.67414	0.396177	-0.102435	-0.270869	0.17143	1.50047	0.17143	1.50047	2.25654	0.413564	1.92322	4.28659	2.06118	1.47489	0.563885
269	-0.828619	2.03563	1.92101	-0.547815	-0.391862	-0.828619	-0.321108	-0.871457	-0.230693	-0.332725	4.94062	0.533262	1.87718	1.72178	1.7295	1.46498	5.8818	-0.270869	0.160479	1.46778	-0.828619	2.03563	1.91269	-0.547815	-0.391862	-0.828619	-0.321108	-0.230693	-0.332725	4.94062	0.533262	1.87718	1.72178	1.70161	1.71134	0.36963	-0.118843	-0.329896	0.160479	1.46778	0.160479	1.46778	2.29754	0.416277	1.90195	4.33368	2.01547	1.49844	0.562544
270	-0.778684	1.99771	1.91269	-0.583124	-0.441034	-0.778684	-0.383776	-0.881884	-0.235014	-0.349549	4.9503	0.576664	1.903	1.75211	1.67414	1.55726	5.76529	-0.329896	0.140339	1.43776	-0.778684	1.99771	1.8829	-0.583124	-0.441034	-0.778684	-0.383776	-0.235014	-0.349549	4.9503	0.576664	1.903	1.75211	1.7961	1.68271	0.400176	-0.154025	-0.317318	0.140339	1.43776	0.140339	1.43776	2.27699	0.411028	1.91872	4.31057	2.00486	1.42829	0.559649
271	-0.801547	2.08411	1.8829	-0.616023	-0.406555	-0.801547	-0.304319	-0.893227	-0.314921	-0.325352	5.00244	0.557807	1.87025	1.77099	1.71134	1.45481	5.76204	-0.317318	0.105179	1.46161	-0.801547	2.08411	1.82717	-0.616023	-0.406555	-0.801547	-0.304319	-0.314921	-0.325352	5.00244	0.557807	1.87025	1.77099	1.68803	1.68736	0.365971	-0.133396	-0.266601	0.105179	1.46161	0.105179	1.46161	2.25945	0.409946	2.00485	4.6188	2.07769	1.44158	0.562275
272	-0.808737	1.9692	1.82717	-0.618776	-0.429424	-0.808737	-0.366397	-0.90583	-0.224011	-0.370896	4.8199	0.532317	1.86579	1.73958	1.68271	1.50899	5.86981	-0.266601	0.124648	1.46946	-0.808737	1.9692	1.87227	-0.618776	-0.429424	-0.808737	-0.366397	-0.224011	-0.370896	4.8199	0.532317	1.86579	1.73958	1.63108	1.70161	0.361323	-0.124888	-0.343458	0.124648	1.46946	0.124648	1.46946	2.25959	0.406498	1.94346	4.47674	2.07809	1.47119	0.558372
273	-0.798666	1.9738	1.87227	-0.600854	-0.453706	-0.798666	-0.37248	-0.873396	-0.191865	-0.365524	4.84485	0.532822	1.84812	1.71683	1.68736	1.54217	5.81074	-0.343458	0.183764	1.47567	-0.798666	1.9738	1.929	-0.600854	-0.453706	-0.798666	-0.37248	-0.191865	-0.365524	4.84485	0.532822	1.84812	1.71683	1.80362	1.7961	0.368766	-0.14449	-0.365138	0.183764	1.47567	0.183764	1.47567	2.24276	0.408547	1.86078	4.47517	2.06816	1.51896	0.559849
274	-0.814457	1.99959	1.929	-0.611676	-0.42157	-0.814457	-0.355081	-0.897165	-0.256389	-0.339682	4.99495	0.533922	1.84821	1.74917	1.70161	1.41267	5.85343	-0.365138	0.17453	1.5154	-0.814457	1.99959	1.90403	-0.611676	-0.42157	-0.814457	-0.355081	-0.256389	-0.339682	4.99495	0.533922	1.84821	1.74917	1.67265	1.68803	0.383256	-0.0876845	-0.359535	0.17453	1.5154	0.17453	1.5154	2.23777	0.417596	2.09015	4.64994	2.16437	1.46933	0.569767
275	-0.808097	1.94025	1.90403	-0.601446	-0.393626	-0.808097	-0.386239	-0.876864	-0.241306	-0.335768	4.87744	0.505246	1.84018	1.74519	1.7961	1.56142	5.88466	-0.359535	0.180829	1.48985	-0.808097	1.94025	1.94876	-0.601446	-0.393626	-0.808097	-0.386239	-0.241306	-0.335768	4.87744	0.505246	1.84018	1.74519	1.66387	1.63108	0.354502	-0.108214	-0.374735	0.180829	1.48985	0.180829	1.48985	2.27943	0.412001	1.66742	4.53519	2.07805	1.49334	0.56067
276	-0.806304	1.97217	1.94876	-0.619801	-0.445663	-0.806304	-0.36796	-0.904199	-0.276936	-0.34828	4.87588	0.517853	1.84537	1.72077	1.68803	1.54521	5.77665	-0.374735	0.146943	1.50047	-0.806304	1.97217	1.90274	-0.619801	-0.445663	-0.806304	-0.36796	-0.276936	-0.34828	4.87588	0.517853	1.84537	1.72077	1.8928	1.80362	0.38276	-0.104841	-0.390323	0.146943	1.50047	0.146943	1.50047	2.26698	0.412242	1.98621	4.58036	2.10931	1.45112	0.562695
277	-0.800169	1.91472	1.90274	-0.579279	-0.453147	-0.800169	-0.354087	-0.873215	-0.223208	-0.359745	4.88821	0.519674	1.86225	1.75052	1.63108	1.51685	5.60281	-0.390323	0.137707	1.45792	-0.800169	1.91472	1.83248	-0.579279	-0.453147	-0.800169	-0.354087	-0.223208	-0.359745	4.88821	0.519674	1.86225	1.75052	1.8928	1.67265	0.386051	-0.109576	-0.42671	0.137707	1.45792	0.137707	1.45792	2.27973	0.407101	1.87933	4.49436	2.11084	1.4673	0.559189
278	-0.791992	1.90641	1.83248	-0.599488	-0.484752	-0.791992	-0.400949	-0.921194	-0.303701	-0.376786	4.89236	0.487178	1.80396	1.71482	1.80362	1.51669	5.65681	-0.42671	0.148851	1.46351	-0.791992	1.90641	1.91914	-0.599488	-0.484752	-0.791992	-0.400949	-0.303701	-0.376786	4.89236	0.487178	1.80396	1.71482	1.8928	1.66387	0.39597	-0.0989708	-0.453863	0.148851	1.46351	0.148851	1.46351	2.28458	0.400616	1.92086	4.52697	2.13863	1.50623	0.551629
279	-0.795653	1.91374	1.91914	-0.603779	-0.460944	-0.795653	-0.410466	-0.891474	-0.305327	-0.371628	4.85456	0.502575	1.85102	1.68554	1.67265	1.52657	5.66908	-0.453863	0.155848	1.45607	-0.795653	1.91374	1.96181	-0.603779	-0.460944	-0.795653	-0.410466	-0.305327	-0.371628	4.85456	0.502575	1.85102	1.68554	1.8928	1.8928	0.36889	-0.081541	-0.433273	0.155848	1.45607	0.155848	1.45607	2.27343	0.403093	2.02845	4.43726	2.14743	1.46619	0.553842
280	-0.790008	2.09291	1.96181	-0.665876	-0.407399	-0.790008	-0.419362	-0.898694	-0.296206	-0.348985	4.94118	0.536252	1.86437	1.76499	1.66387	1.54113	5.79808	-0.433273	0.143274	1.512	-0.790008	2.09291	1.92127	-0.665876	-0.407399	-0.790008	-0.419362	-0.296206	-0.348985	4.94118	0.536252	1.86437	1.76499	1.8928	1.8928	0.381509	-0.0916881	-0.467723	0.143274	1.512	0.143274	1.512	2.16957	0.407435	1.87672	4.35348	2.12123	1.51374	0.556893
281	-0.792266	2.09142	1.92127	-0.59909	-0.422263	-0.792266	-0.385328	-0.909307	-0.155331	-0.370691	4.88085	0.529047	1.84086	1.79823	1.8928	1.47707	5.68705	-0.467723	0.192485	1.49894	-0.792266	2.09142	1.95894	-0.59909	-0.422263	-0.792266	-0.385328	-0.155331	-0.370691	4.88085	0.529047	1.84086	1.79823	1.8928	1.8928	0.366042	-0.0986293	-0.456515	0.192485	1.49894	0.192485	1.49894	2.2305	0.421681	1.83674	4.5996	2.09778	1.49441	0.573837
282	-0.802834	2.05301	1.95894	-0.638122	-0.419816	-0.802834	-0.290643	-0.898791	-0.276389	-0.299884	4.93618	0.530452	1.8352	1.7365	1.8928	1.5065	5.58974	-0.456515	0.177391	1.47558	-0.802834	2.05301	1.92155	-0.638122	-0.419816	-0.802834	-0.290643	-0.276389	-0.299884	4.93618	0.530452	1.8352	1.7365	1.8928	1.8928	0.366942	-0.0880811	-0.492222	0.177391	1.47558	0.177391	1.47558	2.2049	0.415281	1.87637	4.38434	2.15286	1.47348	0.563518
283	-0.827166	2.13415	1.92155	-0.616	-0.442609	-0.827166	-0.371642	-0.869904	-0.362674	-0.3639	4.899	0.546562	1.84905	1.76665	1.8928	1.523	5.7261	-0.492222	0.205425	1.48961	-0.827166	2.13415	1.9033	-0.616	-0.442609	-0.827166	-0.371642	-0.362674	-0.3639	4.899	0.546562	1.84905	1.76665	1.8928	1.8928	0.37298	-0.0953817	-0.502147	0.205425	1.48961	0.205425	1.48961	2.24822	0.41272	1.83544	4.21087	2.16598	1.5068	0.559002
284	-0.821156	1.96399	1.9033	-0.576752	-0.41863	-0.821156	-0.43102	-0.897033	-0.30621	-0.377059	4.8503	0.505147	1.89846	1.76341	1.8928	1.54066	5.70209	-0.502147	0.145282	1.52439	-0.821156	1.96399	1.99246	-0.576752	-0.41863	-0.821156	-0.43102	-0.30621	-0.377059	4.8503	0.505147	1.89846	1.76341	1.8928	1.8928	0.370097	-0.0820361	-0.49627	0.145282	1.52439	0.145282	1.52439	2.22147	0.409863	1.73817	4.23888	2.11986	1.46467	0.555967
285	-0.835601	1.99496	1.99246	-0.581145	-0.438663	-0.835601	-0.456045	-0.875571	-0.24112	-0.371505	4.89563	0.554344	1.86882	1.77656	1.8928	1.548	5.84916	-0.49627	0.193403	1.47988	-0.835601	1.99496	1.92507	-0.581145	-0.438663	-0.835601	-0.456045	-0.24112	-0.371505	4.89563	0.554344	1.86882	1.77656	1.8928	1.8928	0.373768	-0.0818258	-0.49627	0.193403	1.47988	0.193403	1.47988	2.27482	0.416221	1.9316	4.57505	2.15623	1.4699	0.567415
286	-0.822335	2.05146	1.92507	-0.597691	-0.4752	-0.822335	-0.379224	-0.88087	-0.25387	-0.345792	4.88421	0.531682	1.92445	1.75975	1.8928	1.51534	5.70094	-0.49627	0.180345	1.47783	-0.822335	2.05146	1.94961	-0.597691	-0.4752	-0.822335	-0.379224	-0.25387	-0.345792	4.88421	0.531682	1.92445	1.75975	1.8928	1.8928	0.322074	-0.0900792	-0.49627	0.180345	1.47783	0.180345	1.47783	2.24012	0.416728	1.8647	4.32179	2.04214	1.47364	0.564172
287	-0.827897	2.0267	1.94961	-0.571438	-0.450169	-0.827897	-0.434331	-0.895907	-0.266613	-0.373259	4.87456	0.509487	1.85596	1.76084	1.8928	1.56663	5.74925	-0.49627	0.189541	1.52333	-0.827897	2.0267	1.86962	-0.571438	-0.450169	-0.827897	-0.434331	-0.266613	-0.373259	4.87456	0.509487	1.85596	1.76084	1.8928	1.8928	0.377802	-0.0770184	-0.49627	0.189541	1.52333	0.189541	1.52333	2.24258	0.416521	1.69834	4.47178	2.0584	1.47403	0.559553
288	-0.776816	2.02009	1.86962	-0.606031	-0.431985	-0.776816	-0.409524	-0.889295	-0.270179	-0.357523	4.87897	0.520372	1.8558	1.75973	1.8928	1.55714	5.70601	-0.49627	0.201188	1.50337	-0.776816	2.02009	1.84776	-0.606031	-0.431985	-0.776816	-0.409524	-0.270179	-0.357523	4.87897	0.520372	1.8558	1.75973	1.8928	1.8928	0.40586	-0.0488108	-0.49627	0.201188	1.50337	0.201188	1.50337	2.23253	0.410026	1.92391	4.43784	2.1692	1.43778	0.555952
289	-0.808778	2.06173	1.84776	-0.612279	-0.440769	-0.808778	-0.447438	-0.916933	-0.309583	-0.396647	4.85847	0.500896	1.84769	1.78689	1.8928	1.52238	5.80076	-0.49627	0.193944	1.49568	-0.808778	2.06173	1.96934	-0.612279	-0.440769	-0.808778	-0.447438	-0.309583	-0.396647	4.85847	0.500896	1.84769	1.78689	1.8928	1.8928	0.391148	-0.0542296	-0.49627	0.193944	1.49568	0.193944	1.49568	2.2176	0.411416	1.69471	4.18079	2.13011	1.46014	0.557789
290	-0.825124	2.11764	1.96934	-0.631453	-0.429149	-0.825124	-0.314705	-0.898625	-0.39562	-0.334934	4.91713	0.523295	1.89507	1.75326	1.8928	1.55934	5.61841	-0.49627	0.193753	1.49222	-0.825124	2.11764	1.9191	-0.631453	-0.429149	-0.825124	-0.314705	-0.39562	-0.334934	4.91713	0.523295	1.89507	1.75326	1.8928	1.8928	0.380739	-0.0641292	-0.49627	0.193753	1.49222	0.193753	1.49222	2.23061	0.408805	1.85242	4.54544	2.20902	1.46076	0.558392
291	-0.793794	1.99609	1.9191	-0.573111	-0.404468	-0.793794	-0.414439	-0.920351	-0.32764	-0.361341	4.93367	0.502763	1.90357	1.78476	1.8928	1.5644	5.59361	-0.49627	0.195099	1.50082	-0.793794	1.99609	1.93736	-0.573111	-0.404468	-0.793794	-0.414439	-0.32764	-0.361341	4.93367	0.502763	1.90357	1.78476	1.8928	1.8928	0.387435	-0.051304	-0.49627	0.195099	1.50082	0.195099	1.50082	2.20192	0.413783	2.08268	4.36176	2.12489	1.45447	0.563172
292	-0.81488	1.97767	1.93736	-0.607647	-0.453839	-0.81488	-0.388948	-0.884318	-0.338787	-0.373868	4.84248	0.512207	1.79938	1.71198	1.8928	1.56235	5.61648	-0.49627	0.200473	1.50715	-0.81488	1.97767	1.95291	-0.607647	-0.453839	-0.81488	-0.388948	-0.338787	-0.373868	4.84248	0.512207	1.79938	1.71198	1.8928	1.8928	0.407403	-0.0546143	-0.49627	0.200473	1.50715	0.200473	1.50715	2.21428	0.404648	1.94681	4.61512	2.14219	1.45673	0.555302
293	-0.813851	1.89279	1.95291	-0.662827	-0.476053	-0.813851	-0.410135	-0.896974	-0.306868	-0.368564	4.86719	0.494103	1.8063	1.74181	1.8928	1.57713	5.64803	-0.49627	0.187901	1.5297	-0.813851	1.89279	2.01885	-0.662827	-0.476053	-0.813851	-0.410135	-0.306868	-0.368564	4.86719	0.494103	1.8063	1.74181	1.8928	1.8928	0.368715	-0.0533826	-0.49627	0.187901	1.5297	0.187901	1.5297	2.18034	0.404393	1.65897	4.41593	2.06533	1.44815	0.547423
294	-0.786588	1.83211	2.01885	-0.623522	-0.474157	-0.786588	-0.370401	-0.9003	-0.313839	-0.345041	4.95861	0.48464	1.80574	1.78458	1.8928	1.57158	5.68701	-0.49627	0.212423	1.44064	-0.786588	1.83211	2.01885	-0.623522	-0.474157	-0.786588	-0.370401	-0.313839	-0.345041	4.95861	0.48464	1.80574	1.78458	1.8928	1.8928	0.391219	-0.0320371	-0.49627	0.212423	1.44064	0.212423	1.44064	2.18034	0.412801	1.71742	4.51998	2.15765	1.4348	0.561596
295	-0.789883	1.96089	2.01885	-0.572474	-0.405664	-0.789883	-0.4388	-0.896367	-0.316616	-0.366367	4.92796	0.511283	1.87323	1.77686	1.8928	1.54291	5.73988	-0.49627	0.199264	1.50091	-0.789883	1.96089	2.01885	-0.572474	-0.405664	-0.789883	-0.4388	-0.316616	-0.366367	4.92796	0.511283	1.87323	1.77686	1.8928	1.8928	0.377126	-0.0430253	-0.49627	0.199264	1.50091	0.199264	1.50091	2.18034	0.413186	1.79493	4.53104	2.13767	1.42986	0.560018
296	-0.839112	1.98221	2.01885	-0.591147	-0.451108	-0.839112	-0.408852	-0.880277	-0.362457	-0.384021	4.82092	0.504919	1.88254	1.76478	1.8928	1.62189	5.76049	-0.49627	0.174181	1.49061	-0.839112	1.98221	2.01885	-0.591147	-0.451108	-0.839112	-0.408852	-0.362457	-0.384021	4.82092	0.504919	1.88254	1.76478	1.8928	1.8928	0.368792	-0.0276875	-0.49627	0.174181	1.49061	0.174181	1.49061	2.18034	0.413204	1.71274	4.32868	2.11294	1.38033	0.55964
297	-0.801896	1.97617	2.01885	-0.596564	-0.4516	-0.801896	-0.456696	-0.894702	-0.318663	-0.358629	4.86312	0.485743	1.87835	1.78857	1.8928	1.59517	5.52505	-0.49627	0.226693	1.51425	-0.801896	1.97617	2.01885	-0.596564	-0.4516	-0.801896	-0.456696	-0.318663	-0.358629	4.86312	0.485743	1.87835	1.78857	1.8928	1.8928	0.359832	-0.0423692	-0.49627	0.226693	1.51425	0.226693	1.51425	2.18034	0.40888	1.57871	4.43852	2.10862	1.42958	0.55573
298	-0.798575	1.89439	2.01885	-0.670735	-0.437041	-0.798575	-0.395311	-0.890969	-0.330559	-0.377718	4.85737	0.489145	1.88255	1.8135	1.8928	1.61584	5.56365	-0.49627	0.187405	1.52267	-0.798575	1.89439	2.01885	-0.670735	-0.437041	-0.798575	-0.395311	-0.330559	-0.377718	4.85737	0.489145	1.88255	1.8135	1.8928	1.8928	0.408908	-0.0310649	-0.49627	0.187405	1.52267	0.187405	1.52267	2.18034	0.400597	1.88534	4.48578	2.1679	1.40488	0.548329
299	-0.798575	1.89439	2.01885	-0.670735	-0.437041	-0.798575	-0.395311	-0.890969	-0.330559	-0.377718	4.85737	0.489145	1.88255	1.8135	1.8928	1.61584	5.56365	-0.49627	0.187405	1.52267	-0.798575	1.89439	2.01885	-0.670735	-0.437041	-0.798575	-0.395311	-0.330559	-0.377718	4.85737	0.489145	1.88255	1.8135	1.8928	1.8928	0.408908	-0.0310649	-0.49627	0.187405	1.52267	0.187405	1.52267	2.18034	0.400597	1.88534	4.48578	2.1679	1.40488	0.548329
300	-0.798575	1.89439	2.01885	-0.670735	-0.437041	-0.798575	-0.395311	-0.890969	-0.330559	-0.377718	4.85737	0.489145	1.88255	1.8135	1.8928	1.61584	5.56365	-0.49627	0.187405	1.52267	-0.798575	1.89439	2.01885	-0.670735	-0.437041	-0.798575	-0.395311	-0.330559	-0.377718	4.85737	0.489145	1.88255	1.8135	1.8928	1.8928	0.408908	-0.0310649	-0.49627	0.187405	1.52267	0.187405	1.52267	2.18034	0.400597	1.88534	4.48578	2.1679	1.40488	0.548329
[truncated: 40 more columns]

## Sheet: Panel I
Genotype	Condition	Peak
WT	Pre	0.0727741
WT	Pre	0.183372
WT	Pre	0.0943919
WT	Pre	0.118442
WT	Pre	0.126108
WT	Pre	0.0727741
WT	Pre	0.134586
WT	Pre	0.0614712
WT	Pre	0.135968
WT	Pre	0.0353869
WT	Pre	0.111483
WT	Pre	0.0382613
WT	Pre	0.0850016
WT	Pre	0.0486427
WT	Pre	0.0738493
WT	Pre	0.0412631
WT	Pre	0.0601148
WT	Pre	0.0681713
WT	Pre	0.0738593
WT	Pre	0.131378
WT	Pre	0.0880877
WT	Pre	0.113025
WT	Pre	0.125873
WT	Pre	0.070416
WT	Pre	0.0940208
WT	Pre	0.102947
WT	Pre	0.0254196
WT	Pre	0.0334659
WT	Pre	0.0673508
WT	Pre	0.0587879
WT	Pre	0.104513
WT	Pre	0.0805602
WT	Pre	0.0595323
WT	Pre	0.12981
WT	Pre	0.065284
WT	Pre	0.065284
WT	Pre	0.0566699
WT	Pre	0.0304853
WT	Pre	0.0505573
WT	Pre	0.0478993
WT	Pre	0.0406343
WT	Pre	0.044114
WT	Pre	0.0611735
WT	Pre	0.036136
WT	Pre	0.0461199
WT	Pre	0.314029
WT	Pre	0.30123
WT	Pre	0.0949679
WT	Pre	0.077685
WT	Pre	0.0532637
WT	Pre	0.0791544
WT	Pre	0.0633421
WT	Pre	0.0723202
WT	Pre	0.0681425
WT	Pre	0.206343
WT	Pre	0.0420814
WT	Pre	0.0922757
WT	Pre	0.0940226
WT	Pre	0.109339
WT	Pre	0.0857413
WT	Pre	0.129222
WT	Pre	0.0782067
WT	Pre	0.0734778
WT	Pre	0.0727741
WT	Pre	0.183372
WT	Pre	0.105407
WT	Pre	0.118442
WT	Pre	0.126108
WT	Pre	0.0727741
WT	Pre	0.134586
WT	Pre	0.0614712
WT	Pre	0.135968
WT	Pre	0.0353869
WT	Pre	0.111483
WT	Pre	0.0382613
WT	Pre	0.0850016
WT	Pre	0.0486427
WT	Pre	0.0738493
WT	Pre	0.0412631
WT	Pre	0.0601148
WT	Pre	0.0681713
WT	Pre	0.0738593
WT	Pre	0.131378
WT	Pre	0.0880877
WT	Pre	0.113025
WT	Pre	0.125873
WT	Pre	0.070416
WT	Pre	0.0940208
WT	Pre	0.102947
WT	Pre	0.0254196
WT	Pre	0.0334659
WT	Pre	0.0673508
WT	Pre	0.0587879
WT	Pre	0.104513
WT	Pre	0.0805602
WT	Pre	0.0595323
WT	Pre	0.12981
WT	Pre	0.065284
WT	Pre	0.065284
WT	Pre	0.0566699
WT	Pre	0.0304853
WT	Pre	0.0505573
WT	Pre	0.0478993
WT	Pre	0.0406343
WT	Pre	0.044114
WT	Pre	0.0611735
WT	Pre	0.036136
WT	Pre	0.0461199
WT	Pre	0.555945
WT	Pre	0.353389
WT	Pre	0.0949679
WT	Pre	0.077685
WT	Pre	0.0532637
WT	Pre	0.0791544
WT	Pre	0.0633421
WT	Pre	0.0723202
WT	Pre	0.0681425
WT	Pre	0.0420814
WT	Pre	0.0922757
WT	Pre	0.0940226
WT	Pre	0.109339
WT	Pre	0.0857413
WT	Pre	0.129222
WT	Pre	0.0782067
WT	Pre	0.0734778
WT	Pre	0.129222
WT	Pre	0.0782067
WT	Pre	0.0734778
WT	Pre	0.301971
WT	Pre	0.0390996
WT	Post	2.16685
WT	Post	2.41665
WT	Post	3.63519
WT	Post	2.01891
WT	Post	2.01283
WT	Post	2.16685
WT	Post	3.49032
WT	Post	0.48576
WT	Post	2.79107
WT	Post	1.56629
WT	Post	5.62385
WT	Post	1.44726
WT	Post	2.55348
WT	Post	2.63334
WT	Post	0.0241199
WT	Post	0.132304
WT	Post	0.0703007
WT	Post	0.112102
WT	Post	0.143113
WT	Post	0.108783
WT	Post	0.0922148
WT	Post	0.0967918
WT	Post	0.177752
WT	Post	0.0937711
WT	Post	0.212006
WT	Post	0.191167
WT	Post	0.154355
WT	Post	0.115879
WT	Post	0.0947334
WT	Post	0.167011
WT	Post	0.0782968
WT	Post	0.0532101
WT	Post	0.0482298
WT	Post	0.142609
WT	Post	0.0472693
WT	Post	0.0472693
WT	Post	0.0737667
WT	Post	0.0755961
WT	Post	0.245409
WT	Post	0.362509
WT	Post	0.144408
WT	Post	0.0105818
WT	Post	0.441163
WT	Post	-0.00423451
WT	Post	0.35771
WT	Post	3.26891
WT	Post	3.26891
WT	Post	0.0475117
WT	Post	0.550024
WT	Post	0.138592
WT	Post	0.121078
WT	Post	0.452779
WT	Post	0.261926
WT	Post	0.0787242
WT	Post	1.90042
WT	Post	1.28021
WT	Post	-0.0146139
WT	Post	0.741183
WT	Post	8.90497
WT	Post	6.14461
WT	Post	8.41542
WT	Post	1.54506
WT	Post	2.36519
WT	Post	2.16685
WT	Post	2.41665
WT	Post	3.63519
WT	Post	2.01891
WT	Post	2.01283
WT	Post	2.16685
WT	Post	3.49032
WT	Post	0.48576
WT	Post	2.79107
WT	Post	1.56629
WT	Post	5.62385
WT	Post	1.44726
WT	Post	2.55348
WT	Post	2.63334
WT	Post	0.0241199
WT	Post	0.132304
WT	Post	0.0703007
WT	Post	0.112102
WT	Post	0.143113
WT	Post	0.108783
WT	Post	0.0922148
WT	Post	0.0967918
WT	Post	0.177752
WT	Post	0.0937711
WT	Post	0.212006
WT	Post	0.191167
WT	Post	0.154355
WT	Post	0.115879
WT	Post	0.0947334
WT	Post	0.167011
WT	Post	0.0782968
WT	Post	0.0532101
WT	Post	0.0482298
WT	Post	0.142609
WT	Post	0.0472693
WT	Post	0.0472693
WT	Post	0.0737667
WT	Post	0.0755961
WT	Post	0.245409
WT	Post	0.362509
WT	Post	0.144408
WT	Post	0.0105818
WT	Post	0.441163
WT	Post	-0.00423451
WT	Post	0.35771
WT	Post	3.26891
WT	Post	3.26891
WT	Post	0.0475117
WT	Post	0.550024
WT	Post	0.138592
WT	Post	0.121078
WT	Post	0.452779
WT	Post	0.261926
WT	Post	0.0787242
WT	Post	1.28021
WT	Post	-0.0146139
WT	Post	0.741183
WT	Post	8.90497
WT	Post	6.14461
WT	Post	8.41542
WT	Post	1.54506
WT	Post	2.36519
WT	Post	8.41542
WT	Post	1.54506
WT	Post	2.36519
WT	Post	2.92094
WT	Post	1.11232
Trl-RNAi	Pre	0.102498
Trl-RNAi	Pre	0.0580812
Trl-RNAi	Pre	0.129034
Trl-RNAi	Pre	0.0594984
Trl-RNAi	Pre	0.114733
Trl-RNAi	Pre	0.0741036
Trl-RNAi	Pre	0.0703984
Trl-RNAi	Pre	0.0503045
Trl-RNAi	Pre	0.075384
Trl-RNAi	Pre	0.0595578
Trl-RNAi	Pre	0.0423731
Trl-RNAi	Pre	0.0570917
Trl-RNAi	Pre	0.093679
Trl-RNAi	Pre	0.170612
Trl-RNAi	Pre	0.022874
Trl-RNAi	Pre	0.204348
Trl-RNAi	Pre	0.237285
Trl-RNAi	Pre	0.175812
Trl-RNAi	Pre	0.0658509
Trl-RNAi	Pre	0.0739926
Trl-RNAi	Pre	0.0897522
Trl-RNAi	Pre	0.0352411
Trl-RNAi	Pre	0.0498503
Trl-RNAi	Pre	0.0332552
Trl-RNAi	Pre	0.0323788
Trl-RNAi	Pre	0.0377345
Trl-RNAi	Pre	0.0766479
Trl-RNAi	Pre	0.101686
Trl-RNAi	Pre	0.0804293
Trl-RNAi	Pre	0.0717965
Trl-RNAi	Pre	0.0868072
Trl-RNAi	Pre	0.337601
Trl-RNAi	Pre	0.109917
Trl-RNAi	Pre	0.0645973
Trl-RNAi	Pre	0.0696717
Trl-RNAi	Pre	0.0217133
Trl-RNAi	Pre	0.635567
Trl-RNAi	Pre	1.17827
Trl-RNAi	Pre	0.0767841
Trl-RNAi	Pre	0.0337983
Trl-RNAi	Pre	0.0284819
Trl-RNAi	Pre	0.0620323
Trl-RNAi	Pre	0.054979
Trl-RNAi	Pre	0.0484829
Trl-RNAi	Pre	0.0494478
Trl-RNAi	Pre	0.0781638
Trl-RNAi	Pre	0.124647
Trl-RNAi	Pre	0.038459
Trl-RNAi	Pre	0.085863
Trl-RNAi	Pre	0.135151
Trl-RNAi	Pre	0.114961
Trl-RNAi	Pre	0.235134
Trl-RNAi	Pre	0.130737
Trl-RNAi	Pre	0.217349
Trl-RNAi	Pre	0.153918
Trl-RNAi	Pre	0.150594
Trl-RNAi	Pre	0.124232
Trl-RNAi	Pre	0.230461
Trl-RNAi	Pre	0.0354748
Trl-RNAi	Pre	0.0267358
Trl-RNAi	Post	0.0966298
Trl-RNAi	Post	0.0360951
Trl-RNAi	Post	0.121238
Trl-RNAi	Post	1.36017
Trl-RNAi	Post	0.0764821
Trl-RNAi	Post	0.267984
Trl-RNAi	Post	0.0618727
Trl-RNAi	Post	0.117046
Trl-RNAi	Post	0.181597
Trl-RNAi	Post	0.141045
Trl-RNAi	Post	0.123886
Trl-RNAi	Post	0.222558
Trl-RNAi	Post	0.518207
Trl-RNAi	Post	0.0589315
Trl-RNAi	Post	0.00922588
Trl-RNAi	Post	7.29576
Trl-RNAi	Post	3.11726
Trl-RNAi	Post	2.46166
Trl-RNAi	Post	0.0417922
Trl-RNAi	Post	0.0840379
Trl-RNAi	Post	0.0244862
Trl-RNAi	Post	0.0405359
Trl-RNAi	Post	0.168677
Trl-RNAi	Post	0.0385791
Trl-RNAi	Post	0.056706
Trl-RNAi	Post	0.121615
Trl-RNAi	Post	0.407508
Trl-RNAi	Post	0.173512
Trl-RNAi	Post	0.282271
Trl-RNAi	Post	0.771176
Trl-RNAi	Post	0.314118
Trl-RNAi	Post	0.0468235
Trl-RNAi	Post	0.187156
Trl-RNAi	Post	0.0921295
Trl-RNAi	Post	0.667344
Trl-RNAi	Post	0.00803407
Trl-RNAi	Post	0.411811
Trl-RNAi	Post	5.75532
Trl-RNAi	Post	0.187333
Trl-RNAi	Post	0.0181391
Trl-RNAi	Post	0.0999905
Trl-RNAi	Post	0.0166253
Trl-RNAi	Post	0.0200643
Trl-RNAi	Post	0.0358542
Trl-RNAi	Post	0.0442254
Trl-RNAi	Post	0.218986
Trl-RNAi	Post	0.150542
Trl-RNAi	Post	0.0497591
Trl-RNAi	Post	0.0293066
Trl-RNAi	Post	0.160666
Trl-RNAi	Post	0.272557
Trl-RNAi	Post	0.386349
Trl-RNAi	Post	0.175366
Trl-RNAi	Post	0.262229
Trl-RNAi	Post	0.244493
Trl-RNAi	Post	0.433678
Trl-RNAi	Post	1.15913
Trl-RNAi	Post	0.621145
Trl-RNAi	Post	3.98226
Trl-RNAi	Post	0.421712
TrlRNAi;Set2OE	Pre	0.0727741
TrlRNAi;Set2OE	Pre	0.183372
TrlRNAi;Set2OE	Pre	0.105407
TrlRNAi;Set2OE	Pre	0.118442
TrlRNAi;Set2OE	Pre	0.126108
TrlRNAi;Set2OE	Pre	0.0727741
TrlRNAi;Set2OE	Pre	0.134586
TrlRNAi;Set2OE	Pre	0.0614712
TrlRNAi;Set2OE	Pre	0.135968
TrlRNAi;Set2OE	Pre	0.0535008
TrlRNAi;Set2OE	Pre	0.111483
TrlRNAi;Set2OE	Pre	0.0382613
TrlRNAi;Set2OE	Pre	0.0850016
TrlRNAi;Set2OE	Pre	0.0486427
TrlRNAi;Set2OE	Pre	0.109276
TrlRNAi;Set2OE	Pre	0.178268
TrlRNAi;Set2OE	Pre	0.115602
TrlRNAi;Set2OE	Pre	0.130271
TrlRNAi;Set2OE	Pre	0.104501
TrlRNAi;Set2OE	Pre	0.0304316
TrlRNAi;Set2OE	Pre	0.0726716
TrlRNAi;Set2OE	Pre	0.0876605
TrlRNAi;Set2OE	Pre	0.213511
TrlRNAi;Set2OE	Pre	0.141943
TrlRNAi;Set2OE	Pre	0.149277
TrlRNAi;Set2OE	Pre	0.107452
TrlRNAi;Set2OE	Pre	0.120022
TrlRNAi;Set2OE	Pre	0.0908453
TrlRNAi;Set2OE	Pre	0.0417899
TrlRNAi;Set2OE	Pre	0.0497849
TrlRNAi;Set2OE	Pre	0.0739926
TrlRNAi;Set2OE	Pre	0.056861
TrlRNAi;Set2OE	Pre	0.0286624
TrlRNAi;Set2OE	Pre	0.0257002
TrlRNAi;Set2OE	Pre	0.0306795
TrlRNAi;Set2OE	Pre	0.0820137
TrlRNAi;Set2OE	Pre	0.0626716
TrlRNAi;Set2OE	Pre	0.0483184
TrlRNAi;Set2OE	Pre	0.0125136
TrlRNAi;Set2OE	Pre	0.0221147
TrlRNAi;Set2OE	Pre	0.0615935
TrlRNAi;Set2OE	Pre	0.013733
TrlRNAi;Set2OE	Pre	0.046299
TrlRNAi;Set2OE	Pre	0.0405826
TrlRNAi;Set2OE	Pre	0.0521644
TrlRNAi;Set2OE	Pre	0.0178983
TrlRNAi;Set2OE	Pre	0.0385091
TrlRNAi;Set2OE	Pre	0.0628428
TrlRNAi;Set2OE	Pre	0.0631269
TrlRNAi;Set2OE	Pre	0.0618533
TrlRNAi;Set2OE	Pre	0.0501944
TrlRNAi;Set2OE	Pre	0.0583132
TrlRNAi;Set2OE	Pre	0.0313545
TrlRNAi;Set2OE	Pre	0.0199683
TrlRNAi;Set2OE	Pre	0.0251498
TrlRNAi;Set2OE	Pre	0.0300007
TrlRNAi;Set2OE	Pre	0.107443
TrlRNAi;Set2OE	Pre	0.0727741
TrlRNAi;Set2OE	Pre	0.183372
TrlRNAi;Set2OE	Pre	0.105407
TrlRNAi;Set2OE	Pre	0.118442
TrlRNAi;Set2OE	Pre	0.126108
TrlRNAi;Set2OE	Pre	0.0727741
TrlRNAi;Set2OE	Pre	0.134586
TrlRNAi;Set2OE	Pre	0.0614712
TrlRNAi;Set2OE	Pre	0.135968
TrlRNAi;Set2OE	Pre	0.0535008
TrlRNAi;Set2OE	Pre	0.111483
TrlRNAi;Set2OE	Pre	0.0382613
TrlRNAi;Set2OE	Pre	0.0850016
TrlRNAi;Set2OE	Pre	0.0486427
TrlRNAi;Set2OE	Pre	0.314029
TrlRNAi;Set2OE	Pre	0.206343
TrlRNAi;Set2OE	Pre	0.128993
TrlRNAi;Set2OE	Pre	0.0857413
TrlRNAi;Set2OE	Pre	0.0782067
TrlRNAi;Set2OE	Pre	0.088027
TrlRNAi;Set2OE	Pre	0.0727741
TrlRNAi;Set2OE	Pre	0.183372
TrlRNAi;Set2OE	Pre	0.310237
TrlRNAi;Set2OE	Pre	0.118442
TrlRNAi;Set2OE	Pre	0.126108
TrlRNAi;Set2OE	Pre	0.0727741
TrlRNAi;Set2OE	Pre	0.134586
TrlRNAi;Set2OE	Pre	0.135968
TrlRNAi;Set2OE	Pre	0.0535008
TrlRNAi;Set2OE	Pre	0.111483
TrlRNAi;Set2OE	Pre	0.0382613
TrlRNAi;Set2OE	Pre	0.0850016
TrlRNAi;Set2OE	Pre	0.0486427
TrlRNAi;Set2OE	Pre	0.64382
TrlRNAi;Set2OE	Pre	0.423287
TrlRNAi;Set2OE	Pre	0.0420814
TrlRNAi;Set2OE	Pre	0.0857413
TrlRNAi;Set2OE	Pre	0.0782067
TrlRNAi;Set2OE	Pre	0.088027
TrlRNAi;Set2OE	Pre	0.0782067
TrlRNAi;Set2OE	Pre	0.088027
TrlRNAi;Set2OE	Pre	0.386336
TrlRNAi;Set2OE	Pre	0.102283
TrlRNAi;Set2OE	Pre	0.0858462
TrlRNAi;Set2OE	Pre	0.0694973
TrlRNAi;Set2OE	Pre	0.0653445
TrlRNAi;Set2OE	Pre	0.0366112
TrlRNAi;Set2OE	Pre	0.115862
TrlRNAi;Set2OE	Pre	0.19585
TrlRNAi;Set2OE	Pre	0.117394
TrlRNAi;Set2OE	Pre	0.140616
TrlRNAi;Set2OE	Pre	0.0725414
TrlRNAi;Set2OE	Pre	1.43811
TrlRNAi;Set2OE	Pre	1.43811
TrlRNAi;Set2OE	Pre	0.118944
TrlRNAi;Set2OE	Pre	0.0874408
TrlRNAi;Set2OE	Pre	0.0438002
TrlRNAi;Set2OE	Pre	0.128993
TrlRNAi;Set2OE	Pre	0.197915
TrlRNAi;Set2OE	Pre	1.43811
TrlRNAi;Set2OE	Pre	0.0573336
TrlRNAi;Set2OE	Pre	0.131594
TrlRNAi;Set2OE	Pre	0.0944277
TrlRNAi;Set2OE	Pre	0.0944277
TrlRNAi;Set2OE	Pre	1.43811
TrlRNAi;Set2OE	Pre	1.43811
TrlRNAi;Set2OE	Pre	0.118944
TrlRNAi;Set2OE	Pre	0.115862
TrlRNAi;Set2OE	Pre	0.19585
TrlRNAi;Set2OE	Pre	0.117394
TrlRNAi;Set2OE	Pre	0.140616
TrlRNAi;Set2OE	Pre	0.0725414
TrlRNAi;Set2OE	Pre	1.43811
TrlRNAi;Set2OE	Pre	1.43811
TrlRNAi;Set2OE	Pre	0.118944
TrlRNAi;Set2OE	Pre	0.0874408
TrlRNAi;Set2OE	Pre	0.0438002
TrlRNAi;Set2OE	Pre	0.128993
TrlRNAi;Set2OE	Pre	0.197915
TrlRNAi;Set2OE	Pre	0.0573336
TrlRNAi;Set2OE	Pre	0.131594
TrlRNAi;Set2OE	Pre	0.0944277
TrlRNAi;Set2OE	Pre	0.0944277
TrlRNAi;Set2OE	Pre	0.175108
TrlRNAi;Set2OE	Pre	0.175108
TrlRNAi;Set2OE	Post	2.16685
TrlRNAi;Set2OE	Post	2.41665
TrlRNAi;Set2OE	Post	3.63519
TrlRNAi;Set2OE	Post	2.01891
TrlRNAi;Set2OE	Post	2.01283
TrlRNAi;Set2OE	Post	2.16685
TrlRNAi;Set2OE	Post	3.49032
TrlRNAi;Set2OE	Post	0.48576
TrlRNAi;Set2OE	Post	2.79107
TrlRNAi;Set2OE	Post	1.56629
TrlRNAi;Set2OE	Post	5.62385
TrlRNAi;Set2OE	Post	1.44726
TrlRNAi;Set2OE	Post	2.55348
TrlRNAi;Set2OE	Post	2.63334
TrlRNAi;Set2OE	Post	0.86151
TrlRNAi;Set2OE	Post	3.34042
TrlRNAi;Set2OE	Post	2.06225
TrlRNAi;Set2OE	Post	0.311006
TrlRNAi;Set2OE	Post	1.6227
TrlRNAi;Set2OE	Post	0.186443
TrlRNAi;Set2OE	Post	1.39486
TrlRNAi;Set2OE	Post	0.305101
TrlRNAi;Set2OE	Post	3.56733
TrlRNAi;Set2OE	Post	0.700053
TrlRNAi;Set2OE	Post	0.410022
TrlRNAi;Set2OE	Post	0.210528
TrlRNAi;Set2OE	Post	0.273335
TrlRNAi;Set2OE	Post	0.208552
TrlRNAi;Set2OE	Post	0.41909
TrlRNAi;Set2OE	Post	0.650762
TrlRNAi;Set2OE	Post	1.59425
TrlRNAi;Set2OE	Post	1.13438
TrlRNAi;Set2OE	Post	0.350709
TrlRNAi;Set2OE	Post	0.322215
TrlRNAi;Set2OE	Post	0.394732
TrlRNAi;Set2OE	Post	0.569048
TrlRNAi;Set2OE	Post	0.358726
TrlRNAi;Set2OE	Post	0.807375
TrlRNAi;Set2OE	Post	0.394366
TrlRNAi;Set2OE	Post	0.478363
TrlRNAi;Set2OE	Post	0.459399
TrlRNAi;Set2OE	Post	0.27476
TrlRNAi;Set2OE	Post	0.309772
TrlRNAi;Set2OE	Post	0.980595
TrlRNAi;Set2OE	Post	2.08001
TrlRNAi;Set2OE	Post	0.865545
TrlRNAi;Set2OE	Post	0.490603
TrlRNAi;Set2OE	Post	1.46849
TrlRNAi;Set2OE	Post	0.914973
TrlRNAi;Set2OE	Post	1.30066
TrlRNAi;Set2OE	Post	0.749349
TrlRNAi;Set2OE	Post	0.304769
TrlRNAi;Set2OE	Post	0.286179
TrlRNAi;Set2OE	Post	0.206141
TrlRNAi;Set2OE	Post	0.0842385
TrlRNAi;Set2OE	Post	0.12163
TrlRNAi;Set2OE	Post	0.185099
TrlRNAi;Set2OE	Post	2.16685
TrlRNAi;Set2OE	Post	2.41665
TrlRNAi;Set2OE	Post	3.63519
TrlRNAi;Set2OE	Post	2.01891
TrlRNAi;Set2OE	Post	2.01283
TrlRNAi;Set2OE	Post	2.16685
TrlRNAi;Set2OE	Post	3.49032
TrlRNAi;Set2OE	Post	0.48576
TrlRNAi;Set2OE	Post	2.79107
TrlRNAi;Set2OE	Post	1.56629
TrlRNAi;Set2OE	Post	5.62385
TrlRNAi;Set2OE	Post	1.44726
TrlRNAi;Set2OE	Post	2.55348
TrlRNAi;Set2OE	Post	2.63334
TrlRNAi;Set2OE	Post	3.26891
TrlRNAi;Set2OE	Post	1.90042
TrlRNAi;Set2OE	Post	8.90497
TrlRNAi;Set2OE	Post	6.14461
TrlRNAi;Set2OE	Post	1.54506
TrlRNAi;Set2OE	Post	2.36519
TrlRNAi;Set2OE	Post	2.16685
TrlRNAi;Set2OE	Post	2.41665
TrlRNAi;Set2OE	Post	3.63519
TrlRNAi;Set2OE	Post	2.01891
TrlRNAi;Set2OE	Post	2.01283
TrlRNAi;Set2OE	Post	2.16685
TrlRNAi;Set2OE	Post	3.49032
TrlRNAi;Set2OE	Post	2.79107
TrlRNAi;Set2OE	Post	1.56629
TrlRNAi;Set2OE	Post	5.62385
TrlRNAi;Set2OE	Post	1.44726
TrlRNAi;Set2OE	Post	2.55348
TrlRNAi;Set2OE	Post	2.63334
TrlRNAi;Set2OE	Post	3.26891
TrlRNAi;Set2OE	Post	3.26891
TrlRNAi;Set2OE	Post	1.28021
TrlRNAi;Set2OE	Post	6.14461
TrlRNAi;Set2OE	Post	1.54506
TrlRNAi;Set2OE	Post	2.36519
TrlRNAi;Set2OE	Post	1.54506
TrlRNAi;Set2OE	Post	2.36519
TrlRNAi;Set2OE	Post	2.92094
TrlRNAi;Set2OE	Post	5.77685
TrlRNAi;Set2OE	Post	4.99167
TrlRNAi;Set2OE	Post	2.62509
TrlRNAi;Set2OE	Post	2.02418
TrlRNAi;Set2OE	Post	1.24317
TrlRNAi;Set2OE	Post	3.8902
TrlRNAi;Set2OE	Post	2.63281
TrlRNAi;Set2OE	Post	2.668
TrlRNAi;Set2OE	Post	2.1326
TrlRNAi;Set2OE	Post	2.15196
TrlRNAi;Set2OE	Post	3.99567
TrlRNAi;Set2OE	Post	3.99567
TrlRNAi;Set2OE	Post	1.90233
TrlRNAi;Set2OE	Post	2.59982
TrlRNAi;Set2OE	Post	1.82587
TrlRNAi;Set2OE	Post	8.90497
TrlRNAi;Set2OE	Post	2.16499
TrlRNAi;Set2OE	Post	3.99567
TrlRNAi;Set2OE	Post	2.17123
TrlRNAi;Set2OE	Post	2.47639
TrlRNAi;Set2OE	Post	2.42822
TrlRNAi;Set2OE	Post	2.42822
TrlRNAi;Set2OE	Post	3.99567
TrlRNAi;Set2OE	Post	3.99567
TrlRNAi;Set2OE	Post	1.90233
TrlRNAi;Set2OE	Post	3.8902
TrlRNAi;Set2OE	Post	2.63281
TrlRNAi;Set2OE	Post	2.668
TrlRNAi;Set2OE	Post	2.1326
TrlRNAi;Set2OE	Post	2.15196
TrlRNAi;Set2OE	Post	3.99567
TrlRNAi;Set2OE	Post	3.99567
TrlRNAi;Set2OE	Post	1.90233
TrlRNAi;Set2OE	Post	2.59982
TrlRNAi;Set2OE	Post	1.82587
TrlRNAi;Set2OE	Post	8.90497
TrlRNAi;Set2OE	Post	2.16499
TrlRNAi;Set2OE	Post	2.17123
TrlRNAi;Set2OE	Post	2.47639
TrlRNAi;Set2OE	Post	2.42822
TrlRNAi;Set2OE	Post	2.42822
TrlRNAi;Set2OE	Post	2.49493
TrlRNAi;Set2OE	Post	2.49493
