# Supplementary material for: Orai-mediated calcium entry determines activity of central dopaminergic neurons by regulation of gene expression
Source: eLife. 2024 Jan 30;12:RP88808. doi: 10.7554/eLife.88808 (PMC10945566; doi:10.7554/eLife.88808)
Supplement: Figure 5—figure supplement 2—source data 1. [file elife-88808-fig5-figsupp2-data1.xlsx]

## Sheet: Sheet1
Accession	Description	GAF Interaction Score		GeneID	Symbol	Log2CPM
Q08605-2	Isoform B of Transcription factor GAGA OS=Drosophila melanogaster GN=Trl	99.6667		NR_074071	lncRNA:CR44042	8.17447
A4V1Y7	Trithorax-like, isoform C OS=Drosophila melanogaster GN=Trl PE=4 SV=1	99.6667		NM_165173	grp	6.14627
Q9V496	Apolipophorins OS=Drosophila melanogaster GN=Rfabg PE=1 SV=2	148		NM_001258923	Hydr2	5.76247
Q2PDY1	Trithorax-like, isoform G OS=Drosophila melanogaster GN=Trl PE=4 SV=1	92		NM_137062	CG6347	7.04972
Q2PDY2	Trithorax-like, isoform I OS=Drosophila melanogaster GN=Trl PE=4 SV=1	91.3333		NR_047967	mir-9c	5.0017
Q08605-4	Isoform I of Transcription factor GAGA OS=Drosophila melanogaster GN=Trl	91.3333		NM_205884	Plc21C	8.05564
A4V1Y6	Trithorax-like, isoform F OS=Drosophila melanogaster GN=Trl PE=4 SV=1	91.3333		NR_125320	lncRNA:CR45180	5.77558
Q08605	Transcription factor GAGA OS=Drosophila melanogaster GN=Trl PE=1 SV=2	91.3333		NM_143574	CG15546	5.99945
Q08605-3	Isoform G of Transcription factor GAGA OS=Drosophila melanogaster GN=Trl	83.6667		NM_001103759	CG34217	8.55358
P37276	Dynein heavy chain, cytoplasmic OS=Drosophila melanogaster GN=Dhc64C PE=2 SV=2	135.667		NM_001201808	CG34398	6.47259
P11147	Heat shock 70 kDa protein cognate 4 OS=Drosophila melanogaster GN=Hsc70-4 PE=1 SV=3	124.667		NM_139615	Cpr64Aa	16.336
P02828	Heat shock protein 83 OS=Drosophila melanogaster GN=Hsp83 PE=1 SV=1	115.667		NR_124455	lncRNA:CR44444	4.34154
P37276-2	Isoform C of Dynein heavy chain, cytoplasmic OS=Drosophila melanogaster GN=Dhc64C	131.333		NM_001110887	l(2)41Ab	5.47859
A1Z8U0	Pre-mRNA processing factor 8 OS=Drosophila melanogaster GN=Prp8 PE=4 SV=1	65		NM_167538	CG32572	5.19516
O61380	Eukaryotic translation initiation factor 4G, isoform A OS=Drosophila melanogaster GN=eIF4G PE=1 SV=3	82.3333		NM_001144747	CG42323	9.05315
A8DZ29	Eukaryotic translation initiation factor 4G, isoform B OS=Drosophila melanogaster GN=eIF4G PE=4 SV=1	82.6667		NM_169074	kra	10.894
Q9VBU7	Nup358 OS=Drosophila melanogaster GN=Nup358 PE=1 SV=2	81.6667		NR_123750	asRNA:CR44029	8.84719
Q9V3P6	26S proteasome non-ATPase regulatory subunit 1 OS=Drosophila melanogaster GN=Rpn2 PE=1 SV=1	102.333		NM_001104147	CG34247	7.02005
P28668	Bifunctional aminoacyl-tRNA synthetase OS=Drosophila melanogaster GN=Aats-glupro PE=1 SV=2	82.6667		NM_079674	Rh2	9.45748
Q9VWI2	Nat1 OS=Drosophila melanogaster GN=Nat1 PE=1 SV=1	53		NM_167957	Pxn	4.92831
Q9V3P6-2	Isoform B of 26S proteasome non-ATPase regulatory subunit 1 OS=Drosophila melanogaster GN=Rpn2	89.6667		NM_080138	comt	4.94907
Q24560	Tubulin beta-1 chain OS=Drosophila melanogaster GN=betaTub56D PE=1 SV=2	108		NM_139617	Cpr64Ac	14.4408
P35600	Replication factor C subunit 1 OS=Drosophila melanogaster GN=Gnf1 PE=1 SV=2	63		NM_168348	CG32036	8.22518
Q9VW54	26S proteasome regulatory complex subunit p97 OS=Drosophila melanogaster GN=Rpn1 PE=1 SV=2	88.3333		NM_001273826	CG43647	6.25957
A1ZBL0	Beta-Tubulin at 56D, isoform A OS=Drosophila melanogaster GN=betaTub56D PE=3 SV=1	104		NM_132862	CG8916	5.28157
P36179	Serine/threonine-protein phosphatase PP2A 65 kDa regulatory subunit OS=Drosophila melanogaster GN=Pp2A-29B PE=1 SV=4	50		NM_001274647	CG34461	12.5133
P48605	T-complex protein 1 subunit gamma OS=Drosophila melanogaster GN=Cctgamma PE=2 SV=2	71.6667		NM_001201801	d	6.30038
A4V303	Cctgamma, isoform B OS=Drosophila melanogaster GN=Cctgamma PE=3 SV=1	71.6667		NM_140617	CG13059	6.01857
P08928	Lamin Dm0 OS=Drosophila melanogaster GN=Lam PE=1 SV=4	47.6667		NM_001275319	cpx	10.2761
Q8T0L3	Ubiquitin-activating enzyme E1 OS=Drosophila melanogaster GN=Uba1 PE=1 SV=1	62.6667		NM_001299054	CG31807	3.67914
A1ZBE9	CG15100 OS=Drosophila melanogaster GN=CG15100 PE=3 SV=1	57.3333		NM_137395	CG10936	8.66167
Q9V3Z4	GH11341p OS=Drosophila melanogaster GN=Rpn5 PE=1 SV=1	58		NM_001043170	CG40470	7.81561
Q9VK69	T-complex protein 1 subunit delta OS=Drosophila melanogaster GN=CG5525 PE=1 SV=1	48		NM_001201615	AANATL7	9.2384
Q94883	DNA replication-related element factor OS=Drosophila melanogaster GN=Dref PE=1 SV=2	56.6667		NR_125289	lncRNA:CR45030	3.60398
Q9VFV9	DnaJ-like-2, isoform A OS=Drosophila melanogaster GN=Droj2 PE=2 SV=1	67.6667		NM_001275240	COX8	5.33752
Q9V405	26S proteasome regulatory complex subunit p48A OS=Drosophila melanogaster GN=Rpt3 PE=1 SV=1	55.6667		NM_001299224	CG12836	6.6394
P06603	Tubulin alpha-1 chain OS=Drosophila melanogaster GN=alphaTub84B PE=2 SV=1	79.6667		NM_170132	twin	4.76821
Q9VXR5	CG9281, isoform B OS=Drosophila melanogaster GN=CG9281 PE=1 SV=1	57		NM_141340	glob3	3.45262
Q24368	Chromatin-remodeling complex ATPase chain Iswi OS=Drosophila melanogaster GN=Iswi PE=1 SV=1	74.6667		NM_001104261	CG12947	8.29927
P06605	Tubulin alpha-3 chain OS=Drosophila melanogaster GN=alphaTub84D PE=1 SV=1	78		NM_137068	tum	5.66556
A4V2J2	Alpha-Tubulin at 84D, isoform B OS=Drosophila melanogaster GN=alphaTub84D PE=3 SV=1	78		NM_001104026	enc	7.75317
P08736	Elongation factor 1-alpha 1 OS=Drosophila melanogaster GN=Ef1alpha48D PE=1 SV=2	116.333		NM_140601	CG13065	10.8579
Q9VQR8	CG33123 OS=Drosophila melanogaster GN=CG33123 PE=3 SV=2	48		NM_136822	CG18335	3.63477
Q9V4C8	Host cell factor OS=Drosophila melanogaster GN=Hcf PE=1 SV=2	54.3333		NM_001104157	Cpr73D	4.64871
O16797	60S ribosomal protein L3 OS=Drosophila melanogaster GN=RpL3 PE=2 SV=3	37.3333		NM_001274115	mbl	13.4997
Q26454	DNA replication licensing factor MCM4 OS=Drosophila melanogaster GN=dpa PE=1 SV=2	56.6667		NM_057353	Rh4	11.6085
P21187	Polyadenylate-binding protein OS=Drosophila melanogaster GN=pAbp PE=1 SV=3	39.3333		NR_048272	lncRNA:CR43431	7.54648
Q9VQE0	Dynamin related protein 1 OS=Drosophila melanogaster GN=Drp1 PE=2 SV=1	52		NR_047969	mir-306	3.31105
Q7KLV9	26S proteasome regulatory complex subunit p42B OS=Drosophila melanogaster GN=Rpn6 PE=1 SV=1	45.6667		NR_125068	lncRNA:CR44923	5.56505
A1Z9U3	GH14689p OS=Drosophila melanogaster GN=Rpn6 PE=1 SV=1	45.6667		NM_143114	CG10514	7.09956
Q9VF03	Brahma associated protein 155 kDa OS=Drosophila melanogaster GN=mor PE=2 SV=3	74		NM_001144279	bs	3.71578
P35875	Poly [ADP-ribose] polymerase OS=Drosophila melanogaster GN=Parp PE=2 SV=1	38.6667		NM_206514	fru	5.97443
P54351	Vesicle-fusing ATPase 2 OS=Drosophila melanogaster GN=Nsf2 PE=2 SV=2	49.6667		NM_001042889	ATPsynG	9.46311
Q9V677	Proteasome-associated protein ECM29 homolog OS=Drosophila melanogaster GN=CG8858 PE=1 SV=1	52		NM_001103965	CG43795	10.8804
Q9VHL2	LD47396p OS=Drosophila melanogaster GN=Tcp-1eta PE=2 SV=2	52.6667		NM_001170283	trv	8.83996
Q9VXQ5	GH13725p OS=Drosophila melanogaster GN=Tcp-1zeta PE=2 SV=1	56.3333		NM_001316470	CG13917	6.46357
A1ZBL1	Beta-Tubulin at 56D, isoform C OS=Drosophila melanogaster GN=betaTub56D PE=3 SV=1	88		NM_164790	Bsg	8.68381
P55830	40S ribosomal protein S3a OS=Drosophila melanogaster GN=RpS3A PE=1 SV=4	50.3333		NM_057988	aurB	5.88348
O16797-4	Isoform B of 60S ribosomal protein L3 OS=Drosophila melanogaster GN=RpL3	36.3333		NM_136880	CG8888	6.99119
Q9VN25	Eukaryotic translation initiation factor 3 subunit A OS=Drosophila melanogaster GN=eIF3-S10 PE=1 SV=1	57.3333		NM_001299130	CG10348	3.71922
P06606	Tubulin alpha-4 chain OS=Drosophila melanogaster GN=alphaTub67C PE=1 SV=1	65.3333		NM_142702	CG5892	3.73469
Q9VXE9	Chromosome-associated protein, isoform A OS=Drosophila melanogaster GN=Cap PE=1 SV=2	50.3333		NM_135845	Vajk2	9.06803
Q8MSW0	Isoleucyl-tRNA synthetase, isoform A OS=Drosophila melanogaster GN=Aats-ile PE=1 SV=1	56.3333		NM_136550	CG8736	11.2526
Q9VC36	Polybromo OS=Drosophila melanogaster GN=polybromo PE=2 SV=1	61.6667		NM_001259993	corto	11.0117
P13060	Elongation factor 2 OS=Drosophila melanogaster GN=Ef2b PE=1 SV=4	50.6667		NM_136215	CG9328	12.2051
O18388	Importin subunit beta OS=Drosophila melanogaster GN=Fs(2)Ket PE=1 SV=2	45		NM_141835	CG14710	9.62854
Q9W392	CG7033, isoform A OS=Drosophila melanogaster GN=CG7033 PE=1 SV=2	49.6667		NM_001014488	CG33552	3.43254
A4V464	CG7033, isoform C OS=Drosophila melanogaster GN=CG7033 PE=3 SV=1	49.6667		NM_167839	CG32483	3.03656
Q9VS62	Smallminded, isoform A OS=Drosophila melanogaster GN=smid PE=1 SV=1	72.6667		NM_176042	Rab14	11.5319
P91638	Smallminded protein OS=Drosophila melanogaster GN=smid PE=1 SV=1	71.6667		NM_137661	CG11159	13.0753
P13060-3	Isoform B of Elongation factor 2 OS=Drosophila melanogaster GN=Ef2b	50		NM_001258709	cac	2.94259
A4V101	Elongation factor 2b, isoform C OS=Drosophila melanogaster GN=Ef2b PE=4 SV=1	49.3333		NM_001273775	CG12547	7.72299
Q9VMJ7	Lysine-specific demethylase lid OS=Drosophila melanogaster GN=lid PE=1 SV=1	53.3333		NM_001275682	CG5399	3.22036
E1JJA4	Shibire, isoform L OS=Drosophila melanogaster GN=shi PE=3 SV=1	49.3333		NM_168839	CG32228	6.95563
P27619	Dynamin OS=Drosophila melanogaster GN=shi PE=1 SV=2	49.3333		NM_168288	Cpr66D	8.00501
A4V4I8	Shibire, isoform F OS=Drosophila melanogaster GN=shi PE=3 SV=1	49.3333		NM_166430	Pu	10.8634
Q8T6I0	EH domain containing protein OS=Drosophila melanogaster GN=Past1 PE=2 SV=1	58		NM_140973	CG5955	6.54966
Q8T8W3	AT21416p OS=Drosophila melanogaster GN=Past1 PE=2 SV=1	58		NM_137626	Cpr56F	7.07052
Q7KU82	Smallminded, isoform B OS=Drosophila melanogaster GN=smid PE=2 SV=1	69.3333		NM_079620	yellow-e	7.35052
E1JJA5	Shibire, isoform M OS=Drosophila melanogaster GN=shi PE=3 SV=1	48		NR_124456	asRNA:CR45131	6.99469
P27619-2	Isoform 2 of Dynamin OS=Drosophila melanogaster GN=shi	48		NM_057486	slp2	8.8557
A4V4J0	Shibire, isoform C OS=Drosophila melanogaster GN=shi PE=3 SV=1	48		NM_080370	Rab32	7.22879
Q9VN21	Growl, isoform A OS=Drosophila melanogaster GN=growl PE=1 SV=1	57.3333		NR_125162	lncRNA:CR44943	2.9272
Q7KMQ0	26S proteasome regulatory complex subunit p48B OS=Drosophila melanogaster GN=Rpt1 PE=1 SV=1	56		NM_133041	CG7135	8.82134
Q9VP57	LD15904p OS=Drosophila melanogaster GN=pzg PE=1 SV=1	43.6667		NM_135783	CG16820	7.03912
P15348	DNA topoisomerase 2 OS=Drosophila melanogaster GN=Top2 PE=1 SV=1	34		NM_001272875	spen	10.1095
Q8IPM3	Growl, isoform B (Fragment) OS=Drosophila melanogaster GN=growl PE=2 SV=2	57		NM_079683	ninaE	9.19256
Q5BI50	Cullin-4, isoform A OS=Drosophila melanogaster GN=Cul-4 PE=1 SV=1	50		NM_165461	EcR	7.81871
P25161	Probable 26S proteasome non-ATPase regulatory subunit 3 OS=Drosophila melanogaster GN=Rpn3 PE=1 SV=1	56.6667		NM_132963	CG16700	4.6369
Q7KK96	SMC2 OS=Drosophila melanogaster GN=SMC2 PE=2 SV=1	46.6667		NM_143113	CG10513	8.87436
Q9VVU6	CG6841 OS=Drosophila melanogaster GN=CG6841 PE=1 SV=2	58		NM_135846	Vajk3	10.2481
Q9W0T1	Nucleosome-remodeling factor subunit NURF301 OS=Drosophila melanogaster GN=E(bx) PE=1 SV=2	57		NM_001298145	ATPsyndelta	8.79711
E1JHV6	Enhancer of bithorax, isoform E OS=Drosophila melanogaster GN=E(bx) PE=4 SV=1	57		NM_001273036	Syt1	8.39864
Q9W0T1-2	Isoform B of Nucleosome-remodeling factor subunit NURF301 OS=Drosophila melanogaster GN=E(bx)	56.3333		NM_079687	Rh3	11.4365
Q9W0T1-3	Isoform C of Nucleosome-remodeling factor subunit NURF301 OS=Drosophila melanogaster GN=E(bx)	55.6667		NM_176541	Efa6	9.03275
Q9W0T1-4	Isoform D of Nucleosome-remodeling factor subunit NURF301 OS=Drosophila melanogaster GN=E(bx)	55		NM_164807	CG14275	5.92276
E1JHV7	Enhancer of bithorax, isoform F OS=Drosophila melanogaster GN=E(bx) PE=4 SV=1	55		NM_142013	apn	3.54576
P09180	60S ribosomal protein L4 OS=Drosophila melanogaster GN=RpL4 PE=2 SV=2	32.6667		NM_136625	CG8027	9.49631
Q9XYU0	DNA replication licensing factor Mcm7 OS=Drosophila melanogaster GN=Mcm7 PE=1 SV=1	47.3333		NM_001259892	Eip75B	11.7211
P52295	Importin subunit alpha OS=Drosophila melanogaster GN=Pen PE=1 SV=2	54.3333		NM_001259440	Lst	4.53292
Q9VKJ3	Nuclear pore complex protein Nup160 homolog OS=Drosophila melanogaster GN=Nup160 PE=1 SV=1	52.3333		NR_047972	mir-79	2.62553
Q9W0B8	Alpha-coatomer protein, isoform A OS=Drosophila melanogaster GN=alphaCop PE=1 SV=1	82		NM_001300213	Rab26	12.686
Q7K3J0	CG8258 OS=Drosophila melanogaster GN=CG8258 PE=2 SV=1	53.3333		NM_139938	CG7213	4.29919
P45437	Coatomer subunit beta OS=Drosophila melanogaster GN=betaCop PE=1 SV=2	58.3333		NM_167561	CG12995	6.50947
Q7KN62-3	Isoform C of Transitional endoplasmic reticulum ATPase TER94 OS=Drosophila melanogaster GN=TER94	39.6667		NM_135859	CG46301	7.47018
E2QCS8	Tho2, isoform B OS=Drosophila melanogaster GN=tho2 PE=4 SV=1	47		NM_176140	lola	7.55996
Q9VQ76	LD36155p OS=Drosophila melanogaster GN=tho2 PE=1 SV=2	46.3333		NR_133269	lncRNA:CR45938	4.48985
Q7KN62	Transitional endoplasmic reticulum ATPase TER94 OS=Drosophila melanogaster GN=TER94 PE=1 SV=1	39.6667		NM_169821	fru	6.36498
P29844	Heat shock 70 kDa protein cognate 3 OS=Drosophila melanogaster GN=Hsc70-3 PE=2 SV=2	50		NM_001170024	Sfp79B	2.80587
P55830-2	Isoform B of 40S ribosomal protein S3a OS=Drosophila melanogaster GN=RpS3A	42.6667		NM_079157	LysX	3.58241
P35875-2	Isoform I of Poly [ADP-ribose] polymerase OS=Drosophila melanogaster GN=Parp	33.3333		NM_001201893	CG31808	15.4866
P48591	Ribonucleoside-diphosphate reductase large subunit OS=Drosophila melanogaster GN=RnrL PE=1 SV=2	36.6667		NM_080517	TotA	7.10689
Q960Z0	Kinesin-like protein Klp10A OS=Drosophila melanogaster GN=Klp10A PE=1 SV=1	44.3333		NM_001202118	Eip63F-1	10.0521
A4V4A1	Klp10A, isoform B OS=Drosophila melanogaster GN=Klp10A PE=3 SV=1	44.3333		NR_037751	lncRNA:CR32218	9.09753
Q9VCD8	SD02122p OS=Drosophila melanogaster GN=SMC1 PE=2 SV=1	43.6667		NM_166019	shot	9.03967
Q9VN25-2	Isoform B of Eukaryotic translation initiation factor 3 subunit A OS=Drosophila melanogaster GN=eIF3-S10	50.6667		NM_079587	Sodh-2	7.65017
Q9XZ34	CG30085 OS=Drosophila melanogaster GN=CG30085 PE=1 SV=1	42.6667		NM_001300457	eIF1A	11.0974
Q9W3C1	Polycomb protein l(1)G0020 OS=Drosophila melanogaster GN=l(1)G0020 PE=1 SV=2	32.6667		NM_143323	CG12880	6.9072
Q9W5R8	60S ribosomal protein L5 OS=Drosophila melanogaster GN=RpL5 PE=1 SV=2	30.3333		NM_001032084	CG33640	6.27086
A1ZAX1	Eukaryotic translation initiation factor 3 subunit C OS=Drosophila melanogaster GN=eIF3-S8 PE=1 SV=1	59.6667		NM_080089	Cyp4p1	7.17375
Q7KN62-2	Isoform D of Transitional endoplasmic reticulum ATPase TER94 OS=Drosophila melanogaster GN=TER94	38		NM_136599	PPO2	9.41186
Q9V3A7	Condensin subunit SMC4 OS=Drosophila melanogaster GN=glu PE=2 SV=1	58.3333		NM_001104202	CG9766	9.07647
Q9VDK7	Srp72 OS=Drosophila melanogaster GN=Srp72 PE=1 SV=1	35		NM_001276174	hdc	10.9573
B7YZG8	CG13349, isoform D OS=Drosophila melanogaster GN=CG13349 PE=4 SV=1	45		NM_130543	CG32812	7.14146
Q7K2G1-2	Isoform 2 of Proteasomal ubiquitin receptor ADRM1 homolog OS=Drosophila melanogaster GN=CG13349	45		NM_079847	Mlc2	8.55398
P12613	T-complex protein 1 subunit alpha OS=Drosophila melanogaster GN=T-cp1 PE=2 SV=2	59.3333		NM_080070	cv-2	9.23169
A4V391	T-complex protein 1 subunit alpha OS=Drosophila melanogaster GN=T-cp1 PE=3 SV=1	59.3333		NM_206689	pkm	9.61417
Q8IR12	Chromosome-associated protein, isoform B OS=Drosophila melanogaster GN=Cap PE=2 SV=1	38		NM_001144280	Slik	7.68138
P42271	Tubulin gamma-2 chain OS=Drosophila melanogaster GN=gammaTub37C PE=1 SV=3	49.6667		NM_001103896	Ttd14	10.5694
P02517	Heat shock protein 26 OS=Drosophila melanogaster GN=Hsp26 PE=1 SV=2	37		NM_001170320	heph	6.98003
P02843	Vitellogenin-1 OS=Drosophila melanogaster GN=Yp1 PE=1 SV=1	36		NM_079434	pip	7.51455
A8DY81	Not1, isoform C OS=Drosophila melanogaster GN=Not1 PE=4 SV=1	48.3333		NM_001104204	cpx	9.54717
A8DY80	Not1, isoform D OS=Drosophila melanogaster GN=Not1 PE=4 SV=1	48.3333		NM_140310	CG4328	7.52874
E2QCN4	Not1, isoform F OS=Drosophila melanogaster GN=Not1 PE=4 SV=1	47.6667		NM_001144260	CG42364	2.96303
A8DY82	Not1, isoform E OS=Drosophila melanogaster GN=Not1 PE=4 SV=1	47.3333		NM_139811	CG10063	2.53121
Q8IP45	Cullin 3, isoform F OS=Drosophila melanogaster GN=Cul-3 PE=3 SV=2	46.6667		NM_166469	CG42365	8.87959
Q9V475	Cullin 3, isoform C OS=Drosophila melanogaster GN=Cul-3 PE=2 SV=1	46.6667		NM_001300701	heph	10.0522
Q7KMP8	26S proteasome regulatory complex subunit p39A OS=Drosophila melanogaster GN=Rpn9 PE=1 SV=1	30.3333		NM_079076	Act57B	7.59931
Q9W1V3	rRNA 2'-O-methyltransferase fibrillarin OS=Drosophila melanogaster GN=Fib PE=1 SV=1	36		NM_142680		3.62308
P02844	Vitellogenin-2 OS=Drosophila melanogaster GN=Yp2 PE=1 SV=2	38.6667		NM_001275988	nAChRalpha1	12.5228
P28668-2	Isoform B of Bifunctional aminoacyl-tRNA synthetase OS=Drosophila melanogaster GN=Aats-glupro	46.6667		NM_001276104	trv	8.72016
B7YZG7	CG13349, isoform B OS=Drosophila melanogaster GN=CG13349 PE=4 SV=1	43		NM_001300244	CG14669	3.47108
Q7K2G1	Proteasomal ubiquitin receptor ADRM1 homolog OS=Drosophila melanogaster GN=CG13349 PE=1 SV=1	43		NM_142601	psidin	9.29471
Q9XYP8	Gamma-tubulin complex component 3 homolog OS=Drosophila melanogaster GN=l(1)dd4 PE=1 SV=2	45.3333		NM_142649	CG4000	6.30914
Q9V466	BcDNA.LD18761 OS=Drosophila melanogaster GN=Nup107 PE=1 SV=1	58.3333		NR_048526	lncRNA:CR34046	3.92887
E1JIM4	Mini spindles, isoform B OS=Drosophila melanogaster GN=msps PE=4 SV=1	49		NR_124310	asRNA:CR44975	5.20345
Q9VEZ3	LP04448p OS=Drosophila melanogaster GN=msps PE=1 SV=3	49		NM_001297969	Vsx1	5.29394
Q9V455	Karyopherin alpha 3 OS=Drosophila melanogaster GN=Kap-alpha3 PE=2 SV=1	30		NR_125127	lncRNA:CR45054	9.89293
Q9V9T4	ATP-dependent chromatin assembly factor large subunit OS=Drosophila melanogaster GN=Acf1 PE=2 SV=1	49		NM_140735	Edc3	10.1679
Q95WY3	FI04781p OS=Drosophila melanogaster GN=Nop56 PE=2 SV=1	31.3333		NM_001014554	lov	6.29794
Q9VA91	40S ribosomal protein S7 OS=Drosophila melanogaster GN=RpS7 PE=2 SV=1	35.6667		NM_058149	ft	6.95755
P54358	DNA polymerase delta catalytic subunit OS=Drosophila melanogaster GN=DNApol-delta PE=1 SV=2	47.3333		NM_001382136		4.69828
Q9VCW3	LP09464p OS=Drosophila melanogaster GN=Nup133 PE=2 SV=2	59.6667		NM_001258602	CanB	5.84803
O62619	Pyruvate kinase OS=Drosophila melanogaster GN=PyK PE=2 SV=2	57		NM_168435	CG32069	10.37
O62619-2	Isoform B of Pyruvate kinase OS=Drosophila melanogaster GN=PyK	57		NM_140783	AstC-R1	8.76177
O62621	Coatomer subunit beta' OS=Drosophila melanogaster GN=beta'Cop PE=2 SV=2	65		NM_142229	Ttc26	8.5995
O18640	Guanine nucleotide-binding protein subunit beta-like protein OS=Drosophila melanogaster GN=Rack1 PE=2 SV=2	39.3333		NM_142876	CG4467	7.21554
Q06559	40S ribosomal protein S3 OS=Drosophila melanogaster GN=RpS3 PE=1 SV=1	46.6667		NM_166724	pan	12.0545
Q9V3V6	26S proteasome regulatory complex subunit p50 OS=Drosophila melanogaster GN=Tbp-1 PE=2 SV=1	46		NM_136772	RpS15Ab	8.79265
Q7PLL6	CG17514, isoform A OS=Drosophila melanogaster GN=CG17514 PE=1 SV=2	31		NM_078891	tsh	7.02509
Q9XZ61	26S proteasome regulatory complex subunit p37A OS=Drosophila melanogaster GN=Uch-L3 PE=2 SV=1	36.6667		NM_176518	MtnD	6.28718
Q5U0Y0	LD13852p OS=Drosophila melanogaster GN=Sin3A PE=1 SV=1	33		NM_133148	CG8034	7.35244
P29742	Clathrin heavy chain OS=Drosophila melanogaster GN=Chc PE=1 SV=1	26.3333		NR_167869	lncRNA:CR46481	8.48656
Q9XZ29	EG:BACR25B3.9 protein OS=Drosophila melanogaster GN=Klp3A PE=1 SV=1	37		NM_170089	Hmgcr	10.323
Q8I0G5-3	Isoform C of Coatomer subunit gamma OS=Drosophila melanogaster GN=gammaCop	39		NM_135068	Cyp28d1	7.84672
Q8I0G5-2	Isoform A of Coatomer subunit gamma OS=Drosophila melanogaster GN=gammaCop	39		NM_001259567	SIFa	14.884
P61857	Tubulin beta-2 chain OS=Drosophila melanogaster GN=betaTub85D PE=1 SV=1	51.6667		NM_165877	CG30203	3.09846
Q9VM69	CG10206-PA OS=Drosophila melanogaster GN=nop5 PE=1 SV=2	28		NM_080499	Zip89B	5.36975
P06607	Vitellogenin-3 OS=Drosophila melanogaster GN=Yp3 PE=1 SV=1	31.3333		NM_001038937	pHCl-1	8.04944
P48601	26S protease regulatory subunit 4 OS=Drosophila melanogaster GN=Pros26.4 PE=1 SV=2	44.3333		NM_001104048	sif	9.07325
E1JJQ3	Gamma-tubulin ring protein 84, isoform E OS=Drosophila melanogaster GN=Grip84 PE=4 SV=1	42.3333		NM_001273825	CG43646	6.0885
Q9W414	Rpt4 OS=Drosophila melanogaster GN=Rpt4 PE=1 SV=2	49		NM_141138	CG11425	9.34082
P31009	40S ribosomal protein S2 OS=Drosophila melanogaster GN=sop PE=1 SV=2	26.6667		NM_206256	CG33233	7.69813
Q9VUV9	Putative U5 small nuclear ribonucleoprotein 200 kDa helicase OS=Drosophila melanogaster GN=CG5931 PE=2 SV=4	45.6667		NM_132359	CG9689	4.99494
Q1RL19	LD15160p OS=Drosophila melanogaster GN=tlk PE=2 SV=1	36.3333		NM_142592	CG4462	7.99643
Q9W4Q4	BcDNA.GH07910 OS=Drosophila melanogaster GN=tlk PE=2 SV=2	36.3333		NR_124415	lncRNA:CR44993	7.558
B7Z120	Tousled-like kinase, isoform I OS=Drosophila melanogaster GN=tlk PE=4 SV=1	36.3333		NM_206533	ETHR	5.85506
Q8IRT7	Tousled-like kinase, isoform C OS=Drosophila melanogaster GN=tlk PE=4 SV=4	36.3333		NM_136448	PIG-G	9.36991
Q8I0G5	Coatomer subunit gamma OS=Drosophila melanogaster GN=gammaCop PE=2 SV=1	37.6667		NM_078942	Or45a	9.40328
Q9W252	DNA repair protein RAD50 OS=Drosophila melanogaster GN=rad50 PE=2 SV=3	38.6667		NM_137944	yellow-d2	9.80559
P52304	Serine/threonine-protein kinase polo OS=Drosophila melanogaster GN=polo PE=1 SV=2	26.3333		NM_131991	NAAT1	5.57711
Q9XYP7-2	Isoform 2 of Gamma-tubulin complex component 2 homolog OS=Drosophila melanogaster GN=Grip84	41		NM_134983	Tps1	5.91759
Q8IQW7	Gamma-tubulin ring protein 84, isoform A OS=Drosophila melanogaster GN=Grip84 PE=2 SV=1	41.3333		NM_001300016	Blimp-1	8.39166
E2QCG7	eIF3-S9, isoform B OS=Drosophila melanogaster GN=eIF3-S9 PE=3 SV=1	45.3333		NM_136586	CG13748	6.38665
Q0E940	Eukaryotic translation initiation factor 3 subunit B OS=Drosophila melanogaster GN=eIF3-S9 PE=1 SV=1	45.3333		NM_165172	grp	2.75492
A1Z928	Sin3A, isoform D OS=Drosophila melanogaster GN=Sin3A PE=4 SV=1	29.6667		NM_001258492	dati	6.3377
P29327	40S ribosomal protein S6 OS=Drosophila melanogaster GN=RpS6 PE=1 SV=1	28.6667		NM_001202004	Kank	5.76861
B7Z126	Tousled-like kinase, isoform G OS=Drosophila melanogaster GN=tlk PE=4 SV=1	35.6667		NM_137438	CG5770	6.79599
Q9V431	Apoptosis inhibitor 5 homolog OS=Drosophila melanogaster GN=Aac11 PE=1 SV=1	30.3333		NM_145761	lov	6.85833
Q8IRT8	Tousled-like kinase, isoform B OS=Drosophila melanogaster GN=tlk PE=2 SV=3	35.6667		NM_080364	bun	9.6238
O18413	26S protease regulatory subunit 8 OS=Drosophila melanogaster GN=Pros45 PE=1 SV=2	45.3333		NM_136885	SkpB	4.0793
P25439-2	Isoform C of ATP-dependent helicase brm OS=Drosophila melanogaster GN=brm	47		NM_141497	Elovl7	8.1333
P25439	ATP-dependent helicase brm OS=Drosophila melanogaster GN=brm PE=1 SV=2	47		NM_057818	Nak	6.52615
Q9XYP7	Gamma-tubulin complex component 2 homolog OS=Drosophila melanogaster GN=Grip84 PE=1 SV=2	40		NM_137112	Arc2	6.19865
Q9V3G7	26S proteasome non-ATPase regulatory subunit 6 OS=Drosophila melanogaster GN=Rpn7 PE=1 SV=1	31.3333		NM_001104381	hdly	6.55205
E2QD75	Cap binding protein 80, isoform B OS=Drosophila melanogaster GN=Cbp80 PE=4 SV=1	41		NM_001316505	BomBc3	5.30076
Q7K4N3	Nuclear cap-binding protein subunit 1 OS=Drosophila melanogaster GN=Cbp80 PE=1 SV=1	41		NM_137093	CG30069	10.1021
Q27268	ATP-dependent RNA helicase WM6 OS=Drosophila melanogaster GN=Hel25E PE=1 SV=1	41.6667		NR_037724	lncRNA:CR42767	2.756
Q9VXN4	Probable arginyl-tRNA synthetase, cytoplasmic OS=Drosophila melanogaster GN=Aats-arg PE=2 SV=1	31.3333		NM_057595	cact	10.1037
Q24208-2	Isoform C of Eukaryotic translation initiation factor 2 subunit 3 OS=Drosophila melanogaster GN=Su(var)3-9	43.6667		NM_057229	hth	9.22264
E1JJQ4	Gamma-tubulin ring protein 84, isoform D OS=Drosophila melanogaster GN=Grip84 PE=4 SV=1	38.6667		NM_206051	Corin	10.0008
Q24208	Eukaryotic translation initiation factor 2 subunit 3 OS=Drosophila melanogaster GN=Su(var)3-9 PE=2 SV=1	45.3333		NM_142111	Cyp313a1	4.61556
A1Z927	Sin3A, isoform A OS=Drosophila melanogaster GN=Sin3A PE=1 SV=1	29		NM_170622	lola	10.7425
Q9U9Q1	Replication factor C 38kD subunit OS=Drosophila melanogaster GN=RfC38 PE=1 SV=1	40		NM_001103734	CG34215	7.41721
Q86BS3	Chromator, isoform A OS=Drosophila melanogaster GN=Chro PE=1 SV=1	30		NM_143214	CG6154	10.7319
Q9VWC7	CG12702 OS=Drosophila melanogaster GN=CG12702-RA PE=1 SV=1	40.6667		NM_001259187	Nhe2	5.32317
Q8IMI7	GM06992p OS=Drosophila melanogaster GN=RpS7 PE=2 SV=1	28.6667		NM_176097	SCAP	9.79472
Q9W384	DALAO protein OS=Drosophila melanogaster GN=dalao PE=1 SV=1	30		NM_001273574	CG5953	6.21422
Q7KKI0	GM12270p OS=Drosophila melanogaster GN=Cct5 PE=2 SV=1	24.3333		NM_139717	l(3)psg2	9.77757
A1Z8U4	T-complex chaperonin 5, isoform B OS=Drosophila melanogaster GN=Cct5 PE=3 SV=1	23.3333		NR_133179	lncRNA:CR45979	6.05551
Q9N6D7	FI03258p OS=Drosophila melanogaster GN=hrg PE=1 SV=1	31.6667		NM_001259957	CG43329	4.89429
P35875-3	Isoform E of Poly [ADP-ribose] polymerase OS=Drosophila melanogaster GN=Parp	24		NM_079204	Tie	5.93807
P22700-2	Isoform A of Calcium-transporting ATPase sarcoplasmic/endoplasmic reticulum type OS=Drosophila melanogaster GN=Ca-P60A	44.3333		NM_134955	CG16713	4.9836
Q8IR99	IGF-II mRNA-binding protein, isoform D OS=Drosophila melanogaster GN=Imp PE=2 SV=1	32.3333		NR_073986	lncRNA:CR44017	5.8584
P22700	Calcium-transporting ATPase sarcoplasmic/endoplasmic reticulum type OS=Drosophila melanogaster GN=Ca-P60A PE=1 SV=2	44.6667		NM_001273184	Gpdh1	6.42768
Q0KHU2	IGF-II mRNA-binding protein, isoform I OS=Drosophila melanogaster GN=Imp PE=4 SV=1	32.3333		NM_165739	Jra	3.50925
Q9VZ69	IGF-II mRNA-binding protein OS=Drosophila melanogaster GN=Imp PE=2 SV=2	32.3333		NM_001170008	Gabat	8.41446
Q7K012	Brahma associated protein 55kD OS=Drosophila melanogaster GN=Bap55 PE=2 SV=1	34.3333		NM_001170184	GluClalpha	7.521
P06604	Tubulin alpha-2 chain OS=Drosophila melanogaster GN=alphaTub85E PE=1 SV=1	45.3333		NM_057382	slp1	9.16194
P08841	Tubulin beta-3 chain OS=Drosophila melanogaster GN=betaTub60D PE=1 SV=2	41		NM_080087	TrpRS	10.6007
Q9VSS2	Signal recognition particle 68 kDa protein OS=Drosophila melanogaster GN=Srp68 PE=1 SV=1	25.6667		NM_001272952	CG17652	5.71998
Q9VH07	RuvB-like helicase 1 OS=Drosophila melanogaster GN=pont PE=1 SV=1	29.3333		NR_124040	lncRNA:CR45337	2.94876
P14130	40S ribosomal protein S14 OS=Drosophila melanogaster GN=RpS14a PE=1 SV=1	26.6667		NM_137011	GstE14	5.61347
Q9W3E1	GH13214p OS=Drosophila melanogaster GN=l(1)G0095 PE=1 SV=1	36.3333		NM_140213	chrb	11.0835
Q9VKY2	CG5366 OS=Drosophila melanogaster GN=CG5366 PE=2 SV=1	33.3333		NR_133375	lncRNA:CR46008	6.58026
Q9VUQ5	Protein argonaute-2 OS=Drosophila melanogaster GN=AGO2 PE=1 SV=3	19.3333		NM_080353	Prosalpha4	11.3113
Q9VUQ5-2	Isoform C of Protein argonaute-2 OS=Drosophila melanogaster GN=AGO2	19.3333		NM_001300478	Vha13	9.90488
Q9VZF5	FI03252p OS=Drosophila melanogaster GN=pav PE=1 SV=1	16.3333		NM_137404	rdgBbeta	11.8872
Q9VAY2	Glycoprotein 93 OS=Drosophila melanogaster GN=Gp93 PE=1 SV=1	35.3333		NM_001273728	CG9265	6.94739
O61613	Glycylpeptide N-tetradecanoyltransferase OS=Drosophila melanogaster GN=Nmt PE=2 SV=2	28.6667		NM_001275958	CG33111	4.995
Q9VIW3	Ran GTPase-activating protein OS=Drosophila melanogaster GN=RanGap PE=1 SV=1	30.6667		NM_132380	CG43902	10.6029
Q7JVI3	Eukaryotic translation initiation factor 3 subunit M OS=Drosophila melanogaster GN=Tango7 PE=2 SV=1	31.6667		NR_125125	lncRNA:CR45029	6.53992
P45889	Actin-like protein 87C OS=Drosophila melanogaster GN=Arp87C PE=1 SV=2	30.6667		NM_143201	CG14543	8.81511
Q9W0S7	LD20211p OS=Drosophila melanogaster GN=Tudor-SN PE=1 SV=1	22.6667		NM_057605	Ace	12.9238
Q9VP77	CG10565 OS=Drosophila melanogaster GN=CG10565 PE=1 SV=1	23		NR_124778	lncRNA:CR45670	4.94328
Q9VX15	CG8142 OS=Drosophila melanogaster GN=CG8142 PE=1 SV=2	38		NM_001170032	cpx	7.98766
Q9NJH0	Elongation factor 1-gamma OS=Drosophila melanogaster GN=Ef1gamma PE=2 SV=2	29.6667		NM_001104452	CG5028	10.1106
E1JJM0	IGF-II mRNA-binding protein, isoform J OS=Drosophila melanogaster GN=Imp PE=4 SV=1	31.3333		NM_141248	Cdep	5.42718
Q9VCH5	Nup98 OS=Drosophila melanogaster GN=Nup98 PE=1 SV=3	40.3333		NM_140012	CG5653	11.6369
Q9I7D3	Caprin homolog OS=Drosophila melanogaster GN=CG18811 PE=1 SV=1	22.3333		NM_079090	fd59A	6.4585
O97159	Chromodomain-helicase-DNA-binding protein Mi-2 homolog OS=Drosophila melanogaster GN=Mi-2 PE=1 SV=2	37		NM_135595	CG17108	4.00652
E1JI46	Mi-2, isoform C OS=Drosophila melanogaster GN=Mi-2 PE=4 SV=1	37		NM_143572	Cpr100A	9.4539
Q59E34	Mi-2, isoform B OS=Drosophila melanogaster GN=Mi-2 PE=4 SV=1	37		NM_001272132	Pur-alpha	9.40027
P05303	Elongation factor 1-alpha 2 OS=Drosophila melanogaster GN=Ef1alpha100E PE=1 SV=2	47		NM_057346	ase	3.89376
A4V3Q6	Elongation factor 1-alpha OS=Drosophila melanogaster GN=Ef1alpha100E PE=3 SV=1	47		NM_001273502	DnaJ-H	8.11263
P55830-3	Isoform D of 40S ribosomal protein S3a OS=Drosophila melanogaster GN=RpS3A	27.3333		NM_001259327	Cyp49a1	3.87769
P46222	60S ribosomal protein L11 OS=Drosophila melanogaster GN=RpL11 PE=1 SV=2	18		NM_001169414	Msp300	7.52289
Q9VEG6	Chorion peroxidase OS=Drosophila melanogaster GN=Pxt PE=2 SV=3	25.6667		NM_001300069	CG32039	8.32028
Q9W327	Lysyl-tRNA synthetase OS=Drosophila melanogaster GN=Aats-lys PE=2 SV=2	14		NM_206526	Atpalpha	9.92385
Q8SXM8	Lysyl-tRNA synthetase OS=Drosophila melanogaster GN=Aats-lys PE=2 SV=1	14		NM_165013	bun	10.9926
P23128	Putative ATP-dependent RNA helicase me31b OS=Drosophila melanogaster GN=me31B PE=1 SV=3	50.3333		NM_001259346	CG43244	3.1978
P20028	DNA-directed RNA polymerase I subunit RPA2 OS=Drosophila melanogaster GN=RpI135 PE=2 SV=2	36.3333		NM_140856	CG14096	5.56799
Q2PDU7	CG5899, isoform C OS=Drosophila melanogaster GN=Etl1 PE=4 SV=1	39.3333		NR_124839	lncRNA:CR44348	4.66709
Q9VHW4	Translocase of outer membrane 34 OS=Drosophila melanogaster GN=unc-45 PE=2 SV=1	22		NM_140758	CG5567	9.35557
Q9VL72	CG5899, isoform A OS=Drosophila melanogaster GN=Etl1 PE=1 SV=1	39.3333		NM_135142	CG13995	12.4286
B7YZQ7	Nucleosome remodeling factor-38kD, isoform B OS=Drosophila melanogaster GN=Nurf-38 PE=4 SV=1	28		NM_137106	tej	7.20272
O77460	Inorganic pyrophosphatase OS=Drosophila melanogaster GN=Nurf-38 PE=1 SV=3	28		NM_057319	pAbp	9.23792
P26270	26S proteasome non-ATPase regulatory subunit 7 OS=Drosophila melanogaster GN=Mov34 PE=1 SV=6	29.3333		NM_137333	NiPp1	9.79439
Q0KIB3	CG2051 OS=Drosophila melanogaster GN=CG2051 PE=2 SV=1	19.3333		NM_001260387	CG43117	5.0083
P02518	Heat shock protein 27 OS=Drosophila melanogaster GN=Hsp27 PE=1 SV=2	35.6667		NM_143311	CG5646	8.70684
P53034	Replication factor C subunit 2 OS=Drosophila melanogaster GN=RfC4 PE=1 SV=1	35.3333		NM_168797	CG32213	3.71741
O02195	Eukaryotic translation initiation factor 3 subunit I OS=Drosophila melanogaster GN=Trip1 PE=1 SV=1	29.6667		NM_001382089		7.13067
Q9V4C8-2	Isoform C of Host cell factor OS=Drosophila melanogaster GN=Hcf	23.6667		NM_078722	ds	2.1929
A1Z6M0	Brahma associated protein 170kD OS=Drosophila melanogaster GN=Bap170 PE=4 SV=1	37.3333		NM_001300574	Ms	6.30033
Q9VSI1	CG7182 OS=Drosophila melanogaster GN=CG7182 PE=1 SV=2	25		NM_141658	CG8301	11.6092
P23128-2	Isoform B of Putative ATP-dependent RNA helicase me31b OS=Drosophila melanogaster GN=me31B	47		NM_167314	regucalcin	7.13534
Q9VHR5	CG9684 OS=Drosophila melanogaster GN=CG9684 PE=1 SV=2	26.3333		NM_001014560	DopEcR	10.9519
Q9W485	CG3125, isoform A OS=Drosophila melanogaster GN=l(1)G0060 PE=2 SV=2	31		NM_165860	CG8298	8.92344
Q9VXE6	LD46479p OS=Drosophila melanogaster GN=Nup153 PE=1 SV=4	27		NM_001299867	SERCA	7.74978
A8JV18	Nup153, isoform B OS=Drosophila melanogaster GN=Nup153 PE=4 SV=1	27		NM_135320	Snoo	4.83155
Q59E30	Failed axon connections, isoform C OS=Drosophila melanogaster GN=fax PE=4 SV=1	31.3333		NR_125169	asRNA:CR45206	4.28168
Q95RI5	Failed axon connections, isoform A OS=Drosophila melanogaster GN=fax PE=1 SV=1	31.3333		NM_167045	Snx27	8.63056
Q9VLM8	Alanyl-tRNA synthetase, cytoplasmic OS=Drosophila melanogaster GN=Aats-ala PE=2 SV=1	30.3333		NM_058012	Pcd	13.1215
Q9V3U6	26-29kD-proteinase OS=Drosophila melanogaster GN=26-29-p PE=2 SV=1	27		NM_140802	Atg3	11.3222
Q9VZ00	CG1737 OS=Drosophila melanogaster GN=CG1737 PE=2 SV=1	25.3333		NM_001275944	ATPsynCF6	5.92162
P50887	60S ribosomal protein L22 OS=Drosophila melanogaster GN=RpL22 PE=1 SV=2	24.3333		NM_001104074	Sarm	4.54118
Q9V9W3	RE08669p OS=Drosophila melanogaster GN=RpL6 PE=2 SV=1	16		NM_001276182	tmod	7.61793
P52034	6-phosphofructokinase OS=Drosophila melanogaster GN=Pfk PE=2 SV=2	30.6667		NM_138179	ttm2	4.15867
P52034-2	Isoform A of 6-phosphofructokinase OS=Drosophila melanogaster GN=Pfk	30.6667		NM_140036	CG4476	7.19278
P52034-3	Isoform C of 6-phosphofructokinase OS=Drosophila melanogaster GN=Pfk	30.6667		NM_142117	CG8066	7.99047
P26019	DNA polymerase alpha catalytic subunit OS=Drosophila melanogaster GN=DNApol-alpha180 PE=1 SV=2	20.6667		NM_167341	CG32650	3.72855
Q05825	ATP synthase subunit beta, mitochondrial OS=Drosophila melanogaster GN=ATPsyn-beta PE=1 SV=3	24		NM_079254	Cp18	3.82182
Q9VV82	CG32164 OS=Drosophila melanogaster GN=CG32164 PE=4 SV=2	24.3333		NM_143984	CG13841	5.16351
Q9VKB0	FI05224p OS=Drosophila melanogaster GN=Aats-thr PE=2 SV=2	31		NM_142677	CG12278	8.78537
Q8IP94	Threonyl-tRNA synthetase, isoform B OS=Drosophila melanogaster GN=Aats-thr PE=2 SV=1	31		NM_144157	CG13056	8.89767
Q9VY91	CG10990, isoform A OS=Drosophila melanogaster GN=CG10990 PE=1 SV=2	20		NM_135676	Pde1c	7.34041
Q9VJH2	CG31739 OS=Drosophila melanogaster GN=mdy PE=1 SV=3	36.3333		NM_001300317	CG45050	5.81795
Q9VAJ2	Bub3 OS=Drosophila melanogaster GN=Bub3 PE=1 SV=1	17.6667		NM_142809	CG6937	7.76548
Q9VN25-3	Isoform C of Eukaryotic translation initiation factor 3 subunit A OS=Drosophila melanogaster GN=eIF3-S10	32.3333		NM_057311	nub	3.39133
P34739	Transcription termination factor 2 OS=Drosophila melanogaster GN=lds PE=1 SV=2	35.3333		NM_166452	Fkbp14	5.15692
Q7KQZ4-3	Isoform D of Longitudinals lacking protein, isoforms A/B/D/L OS=Drosophila melanogaster GN=lola	20		NM_001258477	pan	10.4867
P23572	Cyclin-dependent kinase 1 OS=Drosophila melanogaster GN=cdc2 PE=1 SV=1	23		NM_136526	CG30371	4.98055
Q9V3K3	RuvB-like helicase 2 OS=Drosophila melanogaster GN=rept PE=1 SV=1	26.3333		NM_001259651	Mrtf	6.67457
Q9V9W2	Ribosomal protein L6, isoform A OS=Drosophila melanogaster GN=RpL6 PE=2 SV=1	15.3333		NM_140313	CG10418	10.1694
Q8MLY8	40S ribosomal protein S8 OS=Drosophila melanogaster GN=RpS8 PE=1 SV=1	19.6667		NM_142969	mora	9.84914
P05990	CAD protein OS=Drosophila melanogaster GN=r PE=1 SV=3	40.3333		NM_001272814	CG1504	7.48171
Q7K0E6	Aspartyl-tRNA synthetase OS=Drosophila melanogaster GN=Aats-asp PE=1 SV=1	26.3333		NM_139383	Vta1	11.1489
P23257	Tubulin gamma-1 chain OS=Drosophila melanogaster GN=gammaTub23C PE=1 SV=2	23.6667		NR_003885	snoRNA:Psi28S-2442b	3.46355
P04052	DNA-directed RNA polymerase II subunit RPB1 OS=Drosophila melanogaster GN=RpII215 PE=1 SV=4	31		NM_001201993	CG42806	9.32566
P17704	40S ribosomal protein S17 OS=Drosophila melanogaster GN=RpS17 PE=2 SV=2	15.6667		NM_168025	PHGPx	5.01542
Q7KT44	CG10602, isoform B OS=Drosophila melanogaster GN=CG10602 PE=2 SV=1	16.6667		NM_143510	CG15528	6.0614
Q9VJ39	CG10602, isoform A OS=Drosophila melanogaster GN=CG10602 PE=2 SV=2	16.6667		NM_079828	Capa	6.9826
Q9VEN9	Protein associated with topo II related-1 OS=Drosophila melanogaster GN=Patr-1 PE=1 SV=1	12.6667		NM_164780	Cka	6.59987
Q9XZU1	Exportin-2 OS=Drosophila melanogaster GN=Cas PE=1 SV=2	23		NM_136033	ncm	8.63979
O61305	DEAD-box helicase Dbp80 OS=Drosophila melanogaster GN=Dbp80 PE=1 SV=1	30.3333		NM_078876	Ddc	15.0512
P07487	Glyceraldehyde-3-phosphate dehydrogenase 2 OS=Drosophila melanogaster GN=Gapdh2 PE=1 SV=2	30		NM_078819	Gr32a	7.38732
Q9VUC1	Hsc70Cb, isoform A OS=Drosophila melanogaster GN=Hsc70Cb PE=2 SV=1	15.6667		NM_132354	Ser7	6.04671
Q9V345	COP9 signalosome complex subunit 4 OS=Drosophila melanogaster GN=CSN4 PE=1 SV=1	19.6667		NM_164879	Cpr30F	10.7287
E1JH01	COP9 complex homolog subunit 4, isoform B OS=Drosophila melanogaster GN=CSN4 PE=4 SV=1	19.6667		NM_080128	Bka	10.2194
P55035	26S proteasome non-ATPase regulatory subunit 4 OS=Drosophila melanogaster GN=Pros54 PE=1 SV=2	28		NM_001272228	Hr4	4.8866
E2QD64	CG2982 OS=Drosophila melanogaster GN=CG2982 PE=4 SV=1	31		NR_073712	lncRNA:CR43704	6.9803
Q7K4H4	Lysine-specific demethylase NO66 OS=Drosophila melanogaster GN=CG2982 PE=1 SV=1	31		NM_170214	CG31097	2.53387
Q9VSM9	Cdc6 OS=Drosophila melanogaster GN=Cdc6 PE=1 SV=1	18.6667		NM_169478	Past1	2.41191
Q9VTU4	Eukaryotic translation initiation factor 3 subunit L OS=Drosophila melanogaster GN=CG5642 PE=1 SV=1	28.3333		NR_133450	lncRNA:CR46100	4.61585
Q8T079	Putative oxidoreductase GLYR1 homolog OS=Drosophila melanogaster GN=CG4747 PE=1 SV=1	24		NM_139572	ntc	8.2164
P41374	Eukaryotic translation initiation factor 2 subunit 1 OS=Drosophila melanogaster GN=eIF-2alpha PE=1 SV=1	26		NM_136813	Cpr47Ec	4.23033
Q9W0A8	FI01658p OS=Drosophila melanogaster GN=RpL23A PE=2 SV=1	17.6667		NM_168802	Ltn1	9.6683
P91875	DNA-directed RNA polymerase I subunit RPA1 OS=Drosophila melanogaster GN=RpI1 PE=1 SV=2	34.6667		NR_073815	lncRNA:CR44146	4.3277
Q02645-2	Isoform B of Protein hu-li tai shao OS=Drosophila melanogaster GN=hts	23.6667		NM_079820	AstA-R2	5.75094
E1JGM4	Hu li tai shao, isoform K OS=Drosophila melanogaster GN=hts PE=4 SV=1	23.6667		NM_132173	Hira	7.36035
A4UZP6	Hu li tai shao, isoform L OS=Drosophila melanogaster GN=hts PE=4 SV=2	23.6667		NM_164800	CG8372	4.89984
Q02645	Protein hu-li tai shao OS=Drosophila melanogaster GN=hts PE=1 SV=2	23.6667		NM_168633	fwe	12.8628
A1ZBK8	Hu li tai shao, isoform D OS=Drosophila melanogaster GN=hts PE=4 SV=1	23.6667		NM_001043240	side-VI	11.2821
Q960E8	General transcription factor IIH subunit 1 OS=Drosophila melanogaster GN=Tfb1 PE=1 SV=1	19		NM_135943	GMF	11.118
Q9W5E4	Lethal (1) 1Bi OS=Drosophila melanogaster GN=l(1)1Bi PE=2 SV=1	17.6667		NM_001299893	CG16786	5.15804
Q7K0L8	CG4616, isoform A OS=Drosophila melanogaster GN=FLASH PE=1 SV=1	12.6667		NM_169409	Jupiter	7.54213
Q9I7R5	CG32165 OS=Drosophila melanogaster GN=CG32165 PE=4 SV=2	23.6667		NM_001300384	Dic1	8.98719
Q9W1C5	CG3173 OS=Drosophila melanogaster GN=CG3173 PE=1 SV=2	30.6667		NM_079352	Prosbeta2	11.4714
P07486	Glyceraldehyde-3-phosphate dehydrogenase 1 OS=Drosophila melanogaster GN=Gapdh1 PE=2 SV=2	28.3333		NM_079231	Neos	2.51348
P40304	Proteasome subunit beta type-1 OS=Drosophila melanogaster GN=Pros26 PE=1 SV=2	19		NR_167870	lncRNA:CR46482	3.32545
Q9VYG2	Brahma associated protein 60kD OS=Drosophila melanogaster GN=Bap60 PE=1 SV=1	32		NM_001103395	ph-d	3.1332
Q24478	Centrosome-associated zinc finger protein CP190 OS=Drosophila melanogaster GN=Cp190 PE=1 SV=2	14.6667		NM_169507	PK2-R1	8.72551
P10987	Actin-5C OS=Drosophila melanogaster GN=Act5C PE=1 SV=4	54		NM_167121	CG9650	8.80285
P02572	Actin-42A OS=Drosophila melanogaster GN=Act42A PE=1 SV=3	50.6667		NM_166012	CG6329	9.9414
Q9VKW3	Replication factor C subunit 3 OS=Drosophila melanogaster GN=RfC3 PE=1 SV=2	25.3333		NM_079011	Cp1	3.49787
Q8IRH5-2	Isoform A of Zinc finger protein CG2199 OS=Drosophila melanogaster GN=CG2199	15		NM_001104369	Ire1	10.0174
Q8IRH5	Zinc finger protein CG2199 OS=Drosophila melanogaster GN=CG2199 PE=1 SV=1	15		NM_135224	TTLL3B	2.67749
Q02748	Eukaryotic initiation factor 4A OS=Drosophila melanogaster GN=eIF-4a PE=2 SV=3	16.6667		NM_079590	Ugt35A1	8.07163
E2QC50	Ribosomal protein S11, isoform C OS=Drosophila melanogaster GN=RpS11 PE=3 SV=1	21		NM_167944	CG32302	4.54613
Q0E9B6	40S ribosomal protein S11 OS=Drosophila melanogaster GN=RpS11 PE=1 SV=1	21		NR_048189	asRNA:CR30267	4.8219
Q9VAW5	La-related protein OS=Drosophila melanogaster GN=larp PE=1 SV=4	19.3333		NM_165319	pr	13.5123
O62602	Licorne OS=Drosophila melanogaster GN=lic PE=1 SV=1	25.6667		NM_167238	Rab9E	2.21001
Q9VTP4	60S ribosomal protein L10a-2 OS=Drosophila melanogaster GN=RpL10Ab PE=2 SV=2	13.6667		NM_134812	mio	8.49933
P41042	40S ribosomal protein S4 OS=Drosophila melanogaster GN=RpS4 PE=2 SV=2	29.3333		NM_079021	AttA	8.37351
Q9VM62	LD34181p OS=Drosophila melanogaster GN=SA PE=2 SV=2	26		NM_206338	CG11658	12.0488
Q9TVM2	Exportin-1 OS=Drosophila melanogaster GN=emb PE=1 SV=1	18		NM_168796	825-Oak	2.87212
P17789	Protein tramtrack, beta isoform OS=Drosophila melanogaster GN=ttk PE=1 SV=2	17.6667		NM_143059	mah	4.47573
Q9VUZ2	CG16838, isoform D OS=Drosophila melanogaster GN=CG16838 PE=2 SV=2	15		NM_143404	CG11841	3.8814
Q86BP6	CG16838, isoform C OS=Drosophila melanogaster GN=CG16838 PE=1 SV=1	15		NM_001201857	Trim9	9.64032
Q8IQ05	Cutlet OS=Drosophila melanogaster GN=cutlet PE=2 SV=2	30.6667		NM_078963	Rab3	14.4504
Q0KI98	FI06027p OS=Drosophila melanogaster GN=Aats-trp PE=2 SV=1	21.3333		NM_001259985	Nep2	5.26142
P46461	Vesicle-fusing ATPase 1 OS=Drosophila melanogaster GN=comt PE=1 SV=1	24		NM_170262	Ald1	14.0554
O61231	60S ribosomal protein L10 OS=Drosophila melanogaster GN=Qm PE=2 SV=1	20.6667		NM_165489	Eb1	4.21443
Q9VHY6	CG2943 OS=Drosophila melanogaster GN=CG2943 PE=2 SV=1	27.6667		NM_135093	CG14015	12.0933
Q9VRP5	Ubiquitin carboxyl-terminal hydrolase 36 OS=Drosophila melanogaster GN=scny PE=1 SV=2	24.6667		NM_137054	CG6280	4.39366
Q9VRP5-3	Isoform D of Ubiquitin carboxyl-terminal hydrolase 36 OS=Drosophila melanogaster GN=scny	24.6667		NM_001272670	disco-r	5.29924
E1JJI5	Casein kinase ialpha, isoform D OS=Drosophila melanogaster GN=CkIalpha PE=4 SV=1	25.6667		NM_057881	Gs1l	8.00278
P54367	Casein kinase I isoform alpha OS=Drosophila melanogaster GN=CkIalpha PE=1 SV=1	25.6667		NM_001274244	NaCP60E	6.43025
P26802	Probable ATP-dependent RNA helicase Dbp73D OS=Drosophila melanogaster GN=Dbp73D PE=2 SV=3	22.6667		NM_057655	ND-ACP	8.29932
P38979-2	Isoform A of 40S ribosomal protein SA OS=Drosophila melanogaster GN=sta	26.3333		NM_136836	CG13203	3.47238
P38979	40S ribosomal protein SA OS=Drosophila melanogaster GN=sta PE=1 SV=2	26.3333		NM_206456	rn	4.99175
O46036-2	Isoform A of C-terminal-binding protein OS=Drosophila melanogaster GN=CtBP	24.6667		NM_137496	CG43066	10.979
A4V2S3	C-terminal binding protein, isoform B OS=Drosophila melanogaster GN=CtBP PE=3 SV=1	24.6667		NM_001272832	CG32521	8.47492
Q7KRY6	Nucleosomal histone kinase 1 OS=Drosophila melanogaster GN=ball PE=1 SV=1	15		NM_134645	Zir	10.5536
A4V3G8	Ballchen, isoform B OS=Drosophila melanogaster GN=ball PE=4 SV=1	14.6667		NR_124410	asRNA:CR44911	2.45161
Q6NL81	RE57391p OS=Drosophila melanogaster GN=RpL5 PE=2 SV=1	13.3333		NM_001169668	Kdm4B	8.18858
P55935	40S ribosomal protein S9 OS=Drosophila melanogaster GN=RpS9 PE=1 SV=2	21		NM_001274230	TM4SF	5.14895
Q9V3D9	BcDNA.GM09489 OS=Drosophila melanogaster GN=Srp54k PE=2 SV=1	18.3333		NM_001274791	Polr3H	11.4626
Q9VGW6	DNA replication licensing factor Mcm5 OS=Drosophila melanogaster GN=Mcm5 PE=1 SV=1	13.6667		NR_073951	lncRNA:CR43966	3.61823
Q9VXK5	CG8939 OS=Drosophila melanogaster GN=CG8939 PE=1 SV=1	8.66667		NR_074035	lncRNA:Hsromega	11.3374
A1Z8S6	Pds5 OS=Drosophila melanogaster GN=pds5 PE=2 SV=1	24.3333		NM_001201926	fok	11.7128
Q9VK45	Target of rapamycin OS=Drosophila melanogaster GN=Tor PE=1 SV=1	27.3333		NM_168024	PHGPx	8.07639
Q9VSD6	D-Importin 7/RanBP7 OS=Drosophila melanogaster GN=msk PE=2 SV=1	18.3333		NM_135781	CG5867	7.5964
B7Z0I8	CG42232 OS=Drosophila melanogaster GN=CG42232 PE=4 SV=1	12.3333		NM_141662	CG9427	4.23461
Q9XZ06	CG11092 OS=Drosophila melanogaster GN=CG11092 PE=1 SV=1	22		NM_001169430	CG5973	4.36426
Q24090	GH08712p OS=Drosophila melanogaster GN=Snr1 PE=1 SV=2	16		NM_001043253	Gyc89Da	6.36868
Q9VW13	CG9330 OS=Drosophila melanogaster GN=CG9330-RA PE=1 SV=1	28		NM_001272449	mei-P26	6.47312
P42283	Longitudinals lacking protein, isoform G OS=Drosophila melanogaster GN=lola PE=1 SV=2	21		NM_139788	CG42747	8.37852
Q5U156	RE01954p OS=Drosophila melanogaster GN=row PE=1 SV=1	28		NM_079864	Gycbeta100B	12.9465
Q9VNI8	Hpr1 OS=Drosophila melanogaster GN=Hpr1 PE=1 SV=1	25.3333		NM_001259761	nwk	7.83748
Q9VHC7	Rumpelstiltskin OS=Drosophila melanogaster GN=rump PE=1 SV=1	30		NM_167564	Fim	2.91823
P17886	Protein crooked neck OS=Drosophila melanogaster GN=crn PE=1 SV=2	26.3333		NM_132334	BCL7-like	8.72685
O46036	C-terminal-binding protein OS=Drosophila melanogaster GN=CtBP PE=1 SV=3	22.3333		NM_168182	CG10077	12.8327
Q8MT06	Guanine nucleotide-binding protein-like 3 homolog OS=Drosophila melanogaster GN=ns1 PE=1 SV=2	9.66667		NM_176116	l(2)k10201	7.94838
A1A708	Uncharacterized protein CG4951 OS=Drosophila melanogaster GN=CG4951 PE=1 SV=1	11		NM_079247	Gr66a	3.18042
Q9VZ20	Dynein light intermediate chain, isoform A OS=Drosophila melanogaster GN=Dlic PE=2 SV=2	19.6667		NM_001259470	CG43324	14.6751
Q9Y0Y5	BcDNA.LD29885 OS=Drosophila melanogaster GN=epsilonCOP PE=1 SV=1	19		NM_001297790	ATPsynbeta	8.321
Q5LK13	Dead box protein 80, isoform B OS=Drosophila melanogaster GN=Dbp80 PE=1 SV=1	25		NM_001038759	CG34015	11.4364
Q9VUM1	CG6876 OS=Drosophila melanogaster GN=Prp31 PE=1 SV=1	17.3333		NM_001274241	Mid1	12.3972
Q6NP69	GST-containing FLYWCH zinc-finger protein OS=Drosophila melanogaster GN=gfzf PE=1 SV=1	18.6667		NM_001014462	Rbp9	11.3902
Q9V463	Nup154 OS=Drosophila melanogaster GN=Nup154 PE=2 SV=1	32.6667		NM_001300614	tx	4.23281
Q9V9R2	Cul-2, isoform A OS=Drosophila melanogaster GN=Cul-2 PE=2 SV=3	26.6667		NM_140157	Blos4	7.70112
A8DYI1	CG30118, isoform B OS=Drosophila melanogaster GN=CG30118 PE=4 SV=1	12.3333		NM_143224	CG5455	4.52829
Q7K556	CG30118, isoform A OS=Drosophila melanogaster GN=CG5544 PE=1 SV=1	12.3333		NM_001201660	mamo	11.2505
Q9V3H2	26S proteasome non-ATPase regulatory subunit 14 OS=Drosophila melanogaster GN=Rpn11 PE=1 SV=1	20		NM_001260423	AstA-R2	3.19548
Q7K2L1	GH28787p OS=Drosophila melanogaster GN=lat PE=1 SV=1	23.6667		NM_078577	Hsc70-3	6.872
A1YK02	Nup75 OS=Drosophila melanogaster GN=Nup75 PE=4 SV=1	29.6667		NM_001273716	vari	2.86759
P43248	DNA mismatch repair protein spellchecker 1 OS=Drosophila melanogaster GN=spel1 PE=3 SV=4	17.6667		NM_001316415	Sod3	6.26465
Q9VBX3	Vig2, isoform B OS=Drosophila melanogaster GN=vig2 PE=1 SV=2	12.3333		NM_001274565	CG8641	12.0169
Q960D3	SD06613p OS=Drosophila melanogaster GN=vig2 PE=1 SV=1	12.3333		NM_168425	Aps	7.25631
P49847	Transcription initiation factor TFIID subunit 6 OS=Drosophila melanogaster GN=Taf6 PE=1 SV=2	21.3333		NM_001300026	ple	15.5825
Q9VZ23	GTP-binding nuclear protein Ran OS=Drosophila melanogaster GN=ran PE=1 SV=1	22.6667		NM_132890	CalpC	7.21016
A4V4A5	Ran, isoform B OS=Drosophila melanogaster GN=ran PE=4 SV=1	22.6667		NM_142330	CG5225	3.7109
Q9VA00	Protein zwilch OS=Drosophila melanogaster GN=zwilch PE=1 SV=1	15.3333		NM_142708	CG17298	11.1816
P20480	Protein claret segregational OS=Drosophila melanogaster GN=ncd PE=1 SV=1	14		NM_001274461	scrt	12.5086
Q9U9Q4	Eukaryotic translation initiation factor 3 subunit H OS=Drosophila melanogaster GN=eIF-3p40 PE=1 SV=2	25		NM_136456	CG1360	5.4362
Q86BB5	Transforming acidic coiled-coil protein, isoform D OS=Drosophila melanogaster GN=tacc PE=1 SV=1	16		NM_142048	CG14367	4.30275
Q95TU9	LD15470p OS=Drosophila melanogaster GN=tacc PE=2 SV=1	16		NM_001014551	RpL41	12.5343
Q8IPN1	Transforming acidic coiled-coil protein, isoform A OS=Drosophila melanogaster GN=tacc PE=2 SV=1	16		NM_176222	BomS6	3.18063
Q95TP9	40S ribosomal protein S6 OS=Drosophila melanogaster GN=RpS6 PE=2 SV=1	17		NM_001202038	CG42697	8.82896
Q9VAW5-2	Isoform A of La-related protein OS=Drosophila melanogaster GN=larp	16.6667		NM_135139	CG9117	7.99751
E1JJ02	La related protein, isoform E OS=Drosophila melanogaster GN=larp PE=4 SV=1	16.6667		NM_139461	CG15877	8.69818
P19889	60S acidic ribosomal protein P0 OS=Drosophila melanogaster GN=RpLP0 PE=1 SV=1	28.6667		NM_166826	CG32017	7.01607
Q95RG1	LD32106p OS=Drosophila melanogaster GN=RpS9 PE=2 SV=1	17.6667		NM_132180	CG10920	2.57271
Q27331	V-type proton ATPase catalytic subunit A isoform 2 OS=Drosophila melanogaster GN=Vha68-2 PE=1 SV=2	14.6667		NM_001275707	CG14894	8.62928
A4V0N4	MIP16230p OS=Drosophila melanogaster GN=Vha68-2 PE=2 SV=1	14.6667		NM_132449	CG1545	11.5129
Q9VQZ6	Probable elongator complex protein 3 OS=Drosophila melanogaster GN=Elp3 PE=2 SV=1	19.3333		NM_132877	CG8958	6.51719
A1Z9I5	Tumbleweed OS=Drosophila melanogaster GN=tum PE=4 SV=1	14.3333		NM_136208	CarT	2.61106
Q9VGP4	LP08082p OS=Drosophila melanogaster GN=Ranbp9 PE=1 SV=1	13.3333		NM_141269	Tim17b1	7.68017
Q9W1H4	DNA ligase 1 OS=Drosophila melanogaster GN=DNA-ligI PE=1 SV=2	11.6667		NM_001274685	bol	13.6312
Q9VEX5	Cell cycle regulator Mat89Bb OS=Drosophila melanogaster GN=Mat89Bb PE=1 SV=1	12.6667		NM_140855	CG14095	7.55096
A8DYI2	CG30118, isoform C OS=Drosophila melanogaster GN=CG30118 PE=4 SV=1	12		NM_080002	CanB	9.17198
P50882	60S ribosomal protein L9 OS=Drosophila melanogaster GN=RpL9 PE=1 SV=2	27		NM_080486	Acf	10.4695
P12982	Serine/threonine-protein phosphatase alpha-2 isoform OS=Drosophila melanogaster GN=Pp1-87B PE=1 SV=1	24.6667		NM_135186	Rchy1	5.03018
A8JUV0	Protein strawberry notch OS=Drosophila melanogaster GN=sno PE=1 SV=1	12		NM_176540	CG33107	10.9329
A8JUV0-4	Isoform C of Protein strawberry notch OS=Drosophila melanogaster GN=sno	12		NM_001273389	Rsf1	11.0825
A8JUV0-3	Isoform B of Protein strawberry notch OS=Drosophila melanogaster GN=sno	12		NM_142660	CG17272	11.2642
Q867Z4	Longitudinals lacking protein, isoforms F/I/K/T OS=Drosophila melanogaster GN=lola PE=1 SV=1	18		NM_166734	CG32006	3.54862
Q8MZI3	CG10077, isoform A OS=Drosophila melanogaster GN=CG10077 PE=1 SV=1	25.6667		NM_136628	Cyp4p2	5.92952
Q7K3D8	DMAP1 OS=Drosophila melanogaster GN=DMAP1 PE=1 SV=1	11.6667		NM_001274306	Glut1	2.47665
O77410	Eukaryotic translation initiation factor 3 subunit E OS=Drosophila melanogaster GN=eIF3-S6 PE=2 SV=1	23.3333		NM_131994	CG16756	5.59824
Q7KRI2	Longitudinals lacking protein-like OS=Drosophila melanogaster GN=lolal PE=1 SV=1	16		NM_206443	Scr	3.34369
E1JGK7	Lola like, isoform E OS=Drosophila melanogaster GN=lolal PE=4 SV=1	16		NM_141483	CG2993	9.39031
P29327-2	Isoform B of 40S ribosomal protein S6 OS=Drosophila melanogaster GN=RpS6	17.6667		NM_079546	mRpS9	9.5643
P35381	ATP synthase subunit alpha, mitochondrial OS=Drosophila melanogaster GN=blw PE=1 SV=2	23		NM_135822	CG18507	2.70745
Q9VN51	Transforming acidic coiled-coil protein, isoform B OS=Drosophila melanogaster GN=tacc PE=2 SV=2	15		NR_124905	asRNA:CR45682	3.1626
A1Z8U9	Ribosomal protein S11, isoform B OS=Drosophila melanogaster GN=RpS11 PE=1 SV=1	16.6667		NM_137367	CG18467	12.2502
Q08473	RNA-binding protein squid OS=Drosophila melanogaster GN=sqd PE=1 SV=3	13		NM_169126	Obp83g	8.70463
P29843	Heat shock 70 kDa protein cognate 1 OS=Drosophila melanogaster GN=Hsc70-1 PE=1 SV=1	16.3333		NM_001043265	Nlg4	3.28762
Q8IGE1	RH43519p OS=Drosophila melanogaster GN=RpL10Ab PE=2 SV=1	10.6667		NM_141408	CG1137	5.44775
Q9W2D9	Eukaryotic translation initiation factor 3 subunit K OS=Drosophila melanogaster GN=CG10306 PE=1 SV=1	12.6667		NM_132195	Ykt6	12.9435
Q9VCB6	AT23187p OS=Drosophila melanogaster GN=twin PE=2 SV=2	22.6667		NM_001032406	kay	6.12979
Q8IMX1	LD39302p OS=Drosophila melanogaster GN=twin PE=2 SV=1	22.6667		NM_136234	CG9272	9.34287
Q7K112	LD18435p OS=Drosophila melanogaster GN=twin PE=2 SV=1	22.6667		NM_136833	ix	8.67594
Q24311	Cullin homolog 1 OS=Drosophila melanogaster GN=lin19 PE=1 SV=2	19.6667		NM_166604	CG9812	5.44271
P16371	Protein groucho OS=Drosophila melanogaster GN=gro PE=1 SV=3	14		NM_206365	ind	2.40171
P16371-2	Isoform A of Protein groucho OS=Drosophila melanogaster GN=gro	14		NM_001316486	lovit	10.7857
Q95U54	GH06271p OS=Drosophila melanogaster GN=Mms19 PE=2 SV=1	19		NM_001144426	Dscam2	6.99455
Q9XZ58	COP9 signalosome complex subunit 5 OS=Drosophila melanogaster GN=CSN5 PE=1 SV=1	13.6667		NM_141631	CG8132	11.0574
Q9VYS3	Regulator of nonsense transcripts 1 homolog OS=Drosophila melanogaster GN=Upf1 PE=1 SV=2	15.6667		NM_079719	glec	12.7953
Q9VJD1	CG6453 OS=Drosophila melanogaster GN=CG6453 PE=1 SV=1	16.6667		NM_135451	Cpr30B	8.70953
P48423	GTPase-activating protein OS=Drosophila melanogaster GN=Gap1 PE=2 SV=2	17.6667		NM_135229	CG17378	9.3809
Q9VWT1	GH22474p OS=Drosophila melanogaster GN=Aats-his PE=2 SV=1	13		NM_140680	CG13022	6.29126
Q8IQX8	Histidyl-tRNA synthetase, isoform B OS=Drosophila melanogaster GN=Aats-his PE=2 SV=1	12.6667		NM_001275591	CtBP	5.07495
Q9VHN7	CG8036, isoform B OS=Drosophila melanogaster GN=CG8036 PE=1 SV=3	18		NM_080039	lolal	9.79113
Q9W437	Raptor OS=Drosophila melanogaster GN=raptor PE=2 SV=1	24		NM_001272384	Tom40	8.71706
Q9VCY3	COP9 signalosome complex subunit 6 OS=Drosophila melanogaster GN=CSN6 PE=1 SV=1	17.3333		NM_168239	Pdp1	4.21351
Q9VIP9	Condensin complex subunit 2 OS=Drosophila melanogaster GN=barr PE=2 SV=1	18		NM_001170374	CG40472	11.1283
Q9VUK8	Glycyl-tRNA synthetase, isoform B OS=Drosophila melanogaster GN=Aats-gly PE=2 SV=1	11		NM_135297	CG7214	15.3992
Q961R8	GH09263p OS=Drosophila melanogaster GN=Aats-gly PE=2 SV=1	11		NM_164577	tutl	8.76044
Q9V3I5	Chromosomal serine/threonine-protein kinase JIL-1 OS=Drosophila melanogaster GN=JIL-1 PE=1 SV=1	17.3333		NM_001202081	zip	2.2267
P32234	GTP-binding protein 128up OS=Drosophila melanogaster GN=128up PE=1 SV=2	18		NM_001272555	hwt	9.9513
Q4V3Z5	CG11788 OS=Drosophila melanogaster GN=CG11788 PE=1 SV=1	22		NM_135194	Phf5a	10.1402
Q95ST4	CG5899, isoform B OS=Drosophila melanogaster GN=Etl1 PE=1 SV=1	29.6667		NM_164943	Ubc2	2.93283
Q9V4S8	COP9 signalosome complex subunit 7 OS=Drosophila melanogaster GN=CSN7 PE=1 SV=2	15.6667		NM_001042893	bun	7.74105
P13496	Dynactin subunit 1 OS=Drosophila melanogaster GN=Gl PE=1 SV=2	25.3333		NM_001300216	CG11438	7.44072
P92177-4	Isoform C of 14-3-3 protein epsilon OS=Drosophila melanogaster GN=14-3-3epsilon	12		NM_001275429	PIG-H	4.92456
P92177-2	Isoform B of 14-3-3 protein epsilon OS=Drosophila melanogaster GN=14-3-3epsilon	12		NM_143295	CG5934	13.3053
P92177-1	Isoform D of 14-3-3 protein epsilon OS=Drosophila melanogaster GN=14-3-3epsilon	12		NM_139984	Nelf-E	10.1905
P92177	14-3-3 protein epsilon OS=Drosophila melanogaster GN=14-3-3epsilon PE=1 SV=2	12		NM_132492	CG43155	10.0929
Q9W4X7	Eukaryotic translation initiation factor 3 subunit G-1 OS=Drosophila melanogaster GN=eIF3-S4-1 PE=1 SV=1	18.6667		NM_001298070	mys	6.82586
Q9W3W8	60S ribosomal protein L17 OS=Drosophila melanogaster GN=RpL17 PE=1 SV=1	13.3333		NM_205996	CG33310	7.30351
Q9VAX8	CG4849 OS=Drosophila melanogaster GN=CG4849 PE=2 SV=1	23		NM_144123	CG13018	9.13538
Q9VV52	CG4877, isoform A OS=Drosophila melanogaster GN=CG4877 PE=1 SV=3	10.6667		NM_142271	CG6126	10.8694
Q9V3C0	ATP-dependent RNA helicase abstrakt OS=Drosophila melanogaster GN=abs PE=1 SV=1	17		NM_135765	Rsph1	4.14635
Q08473-3	Isoform C of RNA-binding protein squid OS=Drosophila melanogaster GN=sqd	12.6667		NR_133306	lncRNA:CR45964	4.50995
Q08473-2	Isoform A of RNA-binding protein squid OS=Drosophila melanogaster GN=sqd	12.6667		NM_001260470	heph	4.03217
Q8I0E9	AT07372p OS=Drosophila melanogaster GN=Hsc70-1 PE=2 SV=1	13.3333		NM_142269	CG8925	2.98738
P32100	60S ribosomal protein L7 OS=Drosophila melanogaster GN=RpL7 PE=2 SV=2	14.3333		NM_001260244	CG12347	2.23539
Q9VKL5	Nup154, isoform B OS=Drosophila melanogaster GN=Nup154 PE=2 SV=2	27		NM_079407	Grd	9.61245
Q7KVP9	Xeroderma pigmentosum D, isoform A OS=Drosophila melanogaster GN=Xpd PE=2 SV=1	18.6667		NM_164323	Or82a	2.68035
Q7KJA9	O-glycosyltransferase OS=Drosophila melanogaster GN=sxc PE=1 SV=1	16.3333		NM_168764	CG32196	6.70662
Q9VVI0	CG6322 OS=Drosophila melanogaster GN=U4-U6-60K PE=1 SV=1	16		NM_001170183	GluClalpha	5.13395
P08181	Casein kinase II subunit alpha OS=Drosophila melanogaster GN=CkIIalpha PE=1 SV=2	15		NM_164619	CG31650	6.67217
A4V2B8	Casein kinase II alpha subunit, isoform C OS=Drosophila melanogaster GN=CkIIalpha PE=4 SV=1	15		NR_133183	asRNA:CR45822	2.89426
Q9VWB8	CG11943, isoform A OS=Drosophila melanogaster GN=CG11943 PE=2 SV=2	23		NM_142494	PGS1	10.2523
Q8IQV9	CG11943, isoform B OS=Drosophila melanogaster GN=CG11943 PE=2 SV=1	23		NM_001259849	CG15715	9.00168
Q9VC55	Absent, small, or homeotic discs 2, isoform D OS=Drosophila melanogaster GN=ash2 PE=2 SV=3	17		NM_001170314	RhoGAP100F	2.57056
Q94545	Absent, small, or homeotic discs 2, isoform C OS=Drosophila melanogaster GN=ash2 PE=2 SV=2	17		NM_142057	Cht5	9.80209
Q9I7Z8	CG18273 OS=Drosophila melanogaster GN=CG18273 PE=2 SV=3	17.3333		NM_136003	mEFTs	10.3663
Q9V406	Activator protein 4 OS=Drosophila melanogaster GN=crp PE=2 SV=1	12.6667		NM_001299348	Csgalnact	10.662
Q9W3U8	CG33691, isoform B OS=Drosophila melanogaster GN=CG4564 PE=2 SV=2	13.6667		NM_001299880	EbpIII	6.93173
P07207	Neurogenic locus Notch protein OS=Drosophila melanogaster GN=N PE=1 SV=3	11.6667		NM_144304	CG18662	3.70147
Q7K485	CathD OS=Drosophila melanogaster GN=cathD PE=2 SV=1	19.3333		NM_001273406	CG33303	6.26796
Q9VKZ7	CG4972 OS=Drosophila melanogaster GN=CG4972 PE=1 SV=2	17.6667		NM_001258892	CG17075	9.29174
Q7KSU6	CG8036, isoform D OS=Drosophila melanogaster GN=CG8036 PE=2 SV=1	17		NM_205871	Syt7	9.47294
P51592	E3 ubiquitin-protein ligase hyd OS=Drosophila melanogaster GN=hyd PE=1 SV=3	35.3333		NM_078591	dmrt11E	4.6893
Q9VRI0	Helicase OS=Drosophila melanogaster GN=Hlc PE=2 SV=2	12		NM_142524	CG6040	8.71888
Q9VUM0	Probable DNA mismatch repair protein Msh6 OS=Drosophila melanogaster GN=Msh6 PE=1 SV=2	18.3333		NR_167861	lncRNA:CR46475	2.91778
P43248-1	Isoform C of DNA mismatch repair protein spellchecker 1 OS=Drosophila melanogaster GN=spel1	14.6667		NM_001316477	CG33946	4.08278
Q9V434	Asparaginyl-tRNA synthetase OS=Drosophila melanogaster GN=Aats-asn PE=2 SV=1	10.6667		NM_079068	Fkbp12	13.4104
Q7KF43	LD16058p OS=Drosophila melanogaster GN=rib PE=1 SV=1	21		NM_165431	stw	5.12562
Q9V5M3-4	Isoform X of Longitudinals lacking protein, isoforms N/O/W/X/Y OS=Drosophila melanogaster GN=lola	17		NM_001259299	brp	9.98788
A1Z7K2	CG30349 OS=Drosophila melanogaster GN=CG30349-RA PE=2 SV=1	12.3333		NM_135961	CG17904	9.96941
Q76NQ0	CG33303 OS=Drosophila melanogaster GN=CG33303 PE=1 SV=1	20		NM_001202213	CG32428	7.01632
Q9VVB5	LD46723p OS=Drosophila melanogaster GN=Lmpt PE=1 SV=2	5.66667		NM_078945	FMRFa	9.15697
Q8IQQ3	Limpet, isoform D OS=Drosophila melanogaster GN=Lmpt PE=2 SV=1	5.66667		NR_003883	snoRNA:Psi28S-3091a	3.43769
E1JJM9	Ribosomal protein S15Aa, isoform F OS=Drosophila melanogaster GN=RpS15Aa PE=3 SV=1	18.3333		NM_132080	Rpt4	12.3113
P48149	40S ribosomal protein S15Aa OS=Drosophila melanogaster GN=RpS15Aa PE=2 SV=2	18.3333		NM_141982	Spc25	2.36372
Q7K0D8	CG2158 OS=Drosophila melanogaster GN=Nup50 PE=1 SV=1	24.3333		NM_001272780	Tao	4.33574
E1JIN6	Osa, isoform D OS=Drosophila melanogaster GN=osa PE=4 SV=1	27.6667		NM_001274108	CG43789	5.00874
Q7KSE8	Osa, isoform C OS=Drosophila melanogaster GN=osa PE=4 SV=1	27.6667		NM_001259568	CG4741	3.63413
Q8IN94	Trithorax group protein osa OS=Drosophila melanogaster GN=osa PE=1 SV=1	27.6667		NR_123912	lncRNA:CR44663	5.22838
Q9VI58	CG1091, isoform B OS=Drosophila melanogaster GN=CG1091 PE=1 SV=1	14.6667		NM_175974	Rtnl1	2.32466
P18053	Proteasome subunit alpha type-4 OS=Drosophila melanogaster GN=Pros29 PE=1 SV=2	15.6667		NM_144078	Teh3	12.2272
P41094	40S ribosomal protein S18 OS=Drosophila melanogaster GN=RpS18 PE=1 SV=1	20		NM_001259893	Eip75B	10.7965
Q7K2B0	Ribosomal RNA-processing protein 8 OS=Drosophila melanogaster GN=CG7137 PE=1 SV=1	12.3333		NM_132151	CG14427	2.84891
Q9V3G1	60S ribosomal protein L8 OS=Drosophila melanogaster GN=RpL8 PE=2 SV=1	16.3333		NM_001103968	Sesn	6.22591
Q9VNE9	60S ribosomal protein L13a OS=Drosophila melanogaster GN=RpL13A PE=1 SV=1	8.33333		NM_140563	CG17026	11.3019
Q7PLS8	Integrator complex subunit 3 homolog OS=Drosophila melanogaster GN=CG17665 PE=1 SV=1	25		NM_001260117	pros	8.77919
Q9XYZ2	Excision repair protein ERCC2/XPD OS=Drosophila melanogaster GN=Xpd PE=2 SV=1	18.3333		NM_057875	SamDC	11.2662
Q7PLP5	CG41099, isoform C OS=Drosophila melanogaster GN=CG41099 PE=1 SV=1	16.3333		NM_142734	CG6656	9.67798
Q7PLP4	CG41099, isoform B OS=Drosophila melanogaster GN=CG41099 PE=4 SV=1	16.3333		NM_001031950	CG33700	3.29943
A8Y582	CG41099, isoform D OS=Drosophila melanogaster GN=CG41099 PE=4 SV=1	16.3333		NM_001275708	CG14882	5.82375
Q9VMQ7	Putative elongator complex protein 4 OS=Drosophila melanogaster GN=CG6907 PE=1 SV=1	14.3333		NM_142994	CG18528	8.3676
Q9W484	Regulator of telomere elongation helicase 1 homolog OS=Drosophila melanogaster GN=CG4078 PE=1 SV=1	13.6667		NM_001259683	CG14989	12.2572
O16797-2	Isoform D of 60S ribosomal protein L3 OS=Drosophila melanogaster GN=RpL3	10.3333		NM_001170239	eIF4EHP	8.27035
Q9VGA4	MBD-R2, isoform B OS=Drosophila melanogaster GN=MBD-R2 PE=1 SV=2	11		NM_137067	CG6553	2.98276
Q7KQM6	PERQ amino acid-rich with GYF domain-containing protein CG11148 OS=Drosophila melanogaster GN=CG11148 PE=1 SV=2	9		NR_123849	asRNA:CR45185	7.48552
Q7KQM6-2	Isoform D of PERQ amino acid-rich with GYF domain-containing protein CG11148 OS=Drosophila melanogaster GN=CG11148	9		NM_001258518	elav	11.2612
P48461	Serine/threonine-protein phosphatase alpha-1 isoform OS=Drosophila melanogaster GN=Pp1alpha-96A PE=1 SV=1	22.3333		NR_133508	lncRNA:CR34335	3.77599
O76324	Discs overgrown protein kinase OS=Drosophila melanogaster GN=dco PE=1 SV=2	21.6667		NM_001272855	fog	4.50751
Q7KN85	ATP citrate lyase, isoform D OS=Drosophila melanogaster GN=ATPCL PE=1 SV=1	30.3333		NM_140005	CG13309	4.06787
E2QCF1	ATP citrate lyase, isoform F OS=Drosophila melanogaster GN=ATPCL PE=4 SV=1	30.3333		NR_125060	lncRNA:CR44922	12.8433
Q9VPB3	CG4365, isoform A OS=Drosophila melanogaster GN=CG4365 PE=2 SV=2	23		NM_001260157	side-IV	6.79744
Q8IPU3	CG4365, isoform C OS=Drosophila melanogaster GN=CG4365 PE=2 SV=1	23		NM_057656	ChAT	12.6453
Q7K110	CG6370 OS=Drosophila melanogaster GN=CG6370 PE=1 SV=1	25.6667		NM_143714	mab-21	9.50247
Q7KN75	Dodeca-satellite-binding protein 1, isoform A OS=Drosophila melanogaster GN=Dp1 PE=2 SV=1	25.6667		NM_144084	ND-B8	2.49339
Q9XYZ5	DNA damage-binding protein 1 OS=Drosophila melanogaster GN=pic PE=1 SV=1	25.3333		NM_001273791	Ars2	6.67589
Q9VW52	CG7757, isoform A OS=Drosophila melanogaster GN=CG7757 PE=1 SV=1	17		NM_079672	Cbp20	11.4134
Q9VPL0	CG3436, isoform A OS=Drosophila melanogaster GN=CG3436 PE=2 SV=1	8.66667		NM_142556	Cpr92A	5.24084
Q9VRP5-5	Isoform F of Ubiquitin carboxyl-terminal hydrolase 36 OS=Drosophila melanogaster GN=scny	17.6667		NM_058125	Rpt1	12.2338
Q9VRP5-4	Isoform E of Ubiquitin carboxyl-terminal hydrolase 36 OS=Drosophila melanogaster GN=scny	17.6667		NM_001042892	bun	6.24073
Q9VRP5-6	Isoform C of Ubiquitin carboxyl-terminal hydrolase 36 OS=Drosophila melanogaster GN=scny	17.6667		NM_167738	CG32523	3.80086
Q9VRP5-2	Isoform B of Ubiquitin carboxyl-terminal hydrolase 36 OS=Drosophila melanogaster GN=scny	17.6667		NM_001043115	Shab	3.59683
Q8INM3	Protein slender lobes OS=Drosophila melanogaster GN=sle PE=1 SV=1	7.66667		NM_079181	Scsalpha1	11.8237
Q8INM3-2	Isoform B of Protein slender lobes OS=Drosophila melanogaster GN=sle	7.66667		NM_176337	CG33158	6.80954
Q9VMX3	CG3756 OS=Drosophila melanogaster GN=CG3756 PE=1 SV=1	13.3333		NM_001300644	trv	4.99969
P17917	Proliferating cell nuclear antigen OS=Drosophila melanogaster GN=mus209 PE=1 SV=2	18		NM_001298843	Try29F	2.88273
E1JJ72	TBP-associated factor 1, isoform D OS=Drosophila melanogaster GN=Taf1 PE=4 SV=1	13.6667		NM_001299324	CG1648	11.8034
P51123-3	Isoform C of Transcription initiation factor TFIID subunit 1 OS=Drosophila melanogaster GN=Taf1	13.6667		NM_001316643	CG33939	10.4332
P51123-2	Isoform A of Transcription initiation factor TFIID subunit 1 OS=Drosophila melanogaster GN=Taf1	13.6667		NM_168021	Drsl4	5.64687
P51123	Transcription initiation factor TFIID subunit 1 OS=Drosophila melanogaster GN=Taf1 PE=1 SV=3	13.6667		NM_057505	bic	10.7357
Q9VH79	RE01104p OS=Drosophila melanogaster GN=Rpt3R PE=2 SV=2	16		NM_001274041	Asx	3.82053
E1JJ68	Rm62, isoform H OS=Drosophila melanogaster GN=Rm62 PE=3 SV=1	19.6667		NM_142399	CG7379	10.3713
P19109	ATP-dependent RNA helicase p62 OS=Drosophila melanogaster GN=Rm62 PE=1 SV=3	19.6667		NM_142727	CG6800	8.4317
P19109-3	Isoform D of ATP-dependent RNA helicase p62 OS=Drosophila melanogaster GN=Rm62	19.6667		NM_001275969	Rox8	3.74025
P19109-4	Isoform E of ATP-dependent RNA helicase p62 OS=Drosophila melanogaster GN=Rm62	19.6667		NM_001274158	Rgk1	10.9302
P19109-2	Isoform C of ATP-dependent RNA helicase p62 OS=Drosophila melanogaster GN=Rm62	19.6667		NM_080119	Pep	6.06031
E1JGP0	Actin 57B, isoform C OS=Drosophila melanogaster GN=Act57B PE=3 SV=1	37		NM_141756	CG31272	2.99101
P10981	Actin-87E OS=Drosophila melanogaster GN=Act87E PE=1 SV=1	35.6667		NM_001260190	Tm1	4.79787
P53501	Actin-57B OS=Drosophila melanogaster GN=Act57B PE=3 SV=1	37		NM_143568	dj-1beta	11.8503
Q9VUE5	LD17962p OS=Drosophila melanogaster GN=stwl PE=2 SV=1	9.33333		NM_001258476	pan	7.02207
P13395	Spectrin alpha chain OS=Drosophila melanogaster GN=alpha-Spec PE=1 SV=2	11		NR_047772	lncRNA:CR43461	6.59926
P41093	60S ribosomal protein L18a OS=Drosophila melanogaster GN=RpL18A PE=1 SV=1	11.6667		NM_142983	CG6356	8.56981
P55824	Probable ubiquitin carboxyl-terminal hydrolase FAF OS=Drosophila melanogaster GN=faf PE=1 SV=2	30.6667		NM_132792	Prp5	7.92949
P55824-3	Isoform 3 of Probable ubiquitin carboxyl-terminal hydrolase FAF OS=Drosophila melanogaster GN=faf	30.3333		NM_140193	nkt	11.0741
Q9VE85	CG7671 OS=Drosophila melanogaster GN=Nup43 PE=1 SV=1	23.3333		NM_136395	ubl	9.96991
Q02645-3	Isoform C of Protein hu-li tai shao OS=Drosophila melanogaster GN=hts	18.3333		NM_135944	c(2)M	6.49394
E1JGM6	Hu li tai shao, isoform H OS=Drosophila melanogaster GN=hts PE=4 SV=1	18.3333		NM_001273727	CG9265	7.37311
Q8SYQ3	Dead box protein 80, isoform A OS=Drosophila melanogaster GN=Dbp80 PE=2 SV=1	18.3333		NM_137187	CG8160	3.32374
Q7JQH9	LD31742p OS=Drosophila melanogaster GN=whd PE=1 SV=1	20		NM_166478	CG30403	8.48956
Q9V3K9	Carnitine palmitoyltransferase I OS=Drosophila melanogaster GN=whd PE=2 SV=1	20		NM_140453	CG9628	6.04486
Q9Y105	Probable glutaminyl-tRNA synthetase OS=Drosophila melanogaster GN=Aats-gln PE=1 SV=1	16		NM_140689	CG6652	4.48571
Q9V9Q4	CG1416, isoform A OS=Drosophila melanogaster GN=CG1416 PE=2 SV=2	11		NM_143287	CG5909	3.78717
Q7JX95	CG11123 OS=Drosophila melanogaster GN=CG11123 PE=2 SV=1	18		NM_143348	CG4849	8.55374
Q9VS02	CG9953 OS=Drosophila melanogaster GN=CG9953 PE=2 SV=1	13		NM_001274720	CG42268	5.52139
A1Z987	Cap-G, isoform F OS=Drosophila melanogaster GN=Cap-G PE=1 SV=2	15.3333		NM_142324	EMC2A	6.12257
P42282	Protein tramtrack, alpha isoform OS=Drosophila melanogaster GN=ttk PE=1 SV=3	13.6667		NM_080127	tutl	2.95238
B3DN53	Cap-G, isoform G OS=Drosophila melanogaster GN=Cap-G PE=2 SV=1	14.3333		NM_001273522	CG16865	3.96765
Q5EAK6	Serine/threonine-protein kinase ATM OS=Drosophila melanogaster GN=tefu PE=2 SV=1	17.3333		NM_170020	AdipoR	4.03667
Q8MRI4	CG1578 OS=Drosophila melanogaster GN=CG1578 PE=1 SV=1	13.6667		NM_142565	CG6195	10.7659
Q9VX44	Lethal (1) G0222, isoform F OS=Drosophila melanogaster GN=l(1)G0222 PE=4 SV=2	11.6667		NM_135892	NC2beta	9.88796
Q8MQX9	Lethal (1) G0222, isoform D OS=Drosophila melanogaster GN=l(1)G0222 PE=1 SV=1	11.6667		NM_001274409	Fife	9.17533
Q9V461	DNA replication licensing factor Mcm6 OS=Drosophila melanogaster GN=Mcm6 PE=1 SV=1	10.6667		NM_143209	CG6142	6.26158
Q9W328	Protein LST8 homolog OS=Drosophila melanogaster GN=CG3004 PE=2 SV=2	12.3333		NM_142112	Pde6	8.94409
Q9NJG9	Polycomb protein Su(z)12 OS=Drosophila melanogaster GN=Su(z)12 PE=1 SV=1	10.6667		NM_001104179	CG32425	9.60477
Q9W1K4	Egalitarian OS=Drosophila melanogaster GN=egl PE=2 SV=4	10.3333		NM_139643	DOR	7.43512
Q95RY2	CG7945, isoform A OS=Drosophila melanogaster GN=CG7945 PE=2 SV=1	9		NM_079327	mRpL20	10.7941
Q7KSN0	MBD-R2, isoform A OS=Drosophila melanogaster GN=MBD-R2 PE=1 SV=1	10.3333		NM_169774	CG31249	8.93921
Q9VRP9	E3 ubiquitin-protein ligase Bre1 OS=Drosophila melanogaster GN=Bre1 PE=1 SV=2	10.3333		NM_137436	CG10910	5.06474
Q9VQL1	CG17259 OS=Drosophila melanogaster GN=CG17259 PE=1 SV=1	16.3333		NR_124702	lncRNA:CR44761	4.03484
Q9W542	LD07342p OS=Drosophila melanogaster GN=mip130 PE=1 SV=3	16		NM_139921	mus301	6.11712
Q9W3U1	CG32732 OS=Drosophila melanogaster GN=CG12542 PE=1 SV=2	12		NM_001274680	CG5068	9.63286
Q9W1F4	THO complex subunit 5 OS=Drosophila melanogaster GN=thoc5 PE=1 SV=2	17.6667		NM_137152	Ciao1	10.6452
Q9W4H6	GM13002p OS=Drosophila melanogaster GN=l(1)G0334 PE=1 SV=2	13.6667		NM_169865	CG6231	4.43223
Q7KVX1	Lethal (1) G0334, isoform C OS=Drosophila melanogaster GN=l(1)G0334 PE=1 SV=1	13.6667		NM_132320	mxc	4.12487
Q9VUJ1	Proteasome subunit beta type OS=Drosophila melanogaster GN=Prosbeta2 PE=2 SV=1	16		NR_124562	lncRNA:CR44458	6.97123
Q9VPI9	CG11376 OS=Drosophila melanogaster GN=CG11376 PE=1 SV=2	12.6667		NM_137581	TBCB	10.7622
P12881	Proteasome subunit alpha type-1 OS=Drosophila melanogaster GN=Pros35 PE=1 SV=1	13.6667		NR_124453	lncRNA:CR45320	4.83831
P46863	Bipolar kinesin KRP-130 OS=Drosophila melanogaster GN=Klp61F PE=1 SV=2	17.3333		NM_206391	Lmpt	3.94988
Q9VUR3	Probable aminoacyl tRNA synthase complex-interacting multifunctional protein 2 OS=Drosophila melanogaster GN=CG12304 PE=1 SV=1	19		NM_143927	COX7A	10.5489
Q9Y162	BcDNA.GH02678 OS=Drosophila melanogaster GN=Vps4 PE=1 SV=1	16		NM_134959	CG2816	7.59197
P42284-3	Isoform H of Longitudinals lacking protein, isoforms H/M/V OS=Drosophila melanogaster GN=lola	15.6667		NM_001169179	sgg	6.19935
Q9V5M6	Longitudinals lacking protein, isoforms J/P/Q/S/Z OS=Drosophila melanogaster GN=lola PE=1 SV=4	15.6667		NM_132417	CG12637	5.79399
Q9VQK7	CG3605 OS=Drosophila melanogaster GN=CG3605 PE=1 SV=2	17.3333		NR_048504	lncRNA:CR43126	4.62438
Q9VHG5	CG8436 OS=Drosophila melanogaster GN=CG8436 PE=1 SV=1	8		NR_123834	asRNA:CR45620	6.30955
P47825	Transcription initiation factor TFIID subunit 4 OS=Drosophila melanogaster GN=Taf4 PE=1 SV=1	14.6667		NM_001169336	CG42578	3.69727
E1JI11	TBP-associated factor 4, isoform F OS=Drosophila melanogaster GN=Taf4 PE=4 SV=1	14.6667		NM_058105	CstF64	7.8413
B7Z060	TBP-associated factor 4, isoform E OS=Drosophila melanogaster GN=Taf4 PE=4 SV=1	14.6667		NM_166330	ena	7.01616
Q8IR93	Dynein light intermediate chain, isoform B OS=Drosophila melanogaster GN=Dlic PE=1 SV=1	15.6667		NM_001259621	Cht2	5.21112
P02574	Actin, larval muscle OS=Drosophila melanogaster GN=Act79B PE=2 SV=2	33		NM_139583	CG10863	10.3063
Q9W1H5	Decapping protein 1, isoform A OS=Drosophila melanogaster GN=Dcp1 PE=1 SV=1	10.6667		NM_001202188	CG13071	11.3594
Q9VVU2	RE17611p OS=Drosophila melanogaster GN=RpL26 PE=2 SV=1	19		NM_141439	CG31248	2.49677
P54397	39 kDa FK506-binding nuclear protein OS=Drosophila melanogaster GN=FK506-bp1 PE=1 SV=2	10.3333		NM_001032032	how	3.68248
P02825	Major heat shock 70 kDa protein Ab OS=Drosophila melanogaster GN=Hsp70Ab PE=1 SV=3	16.3333		NM_080085	ogre	8.10738
P82910	Major heat shock 70 kDa protein Aa OS=Drosophila melanogaster GN=Hsp70Aa PE=2 SV=2	16.3333		NM_167744	tty	6.38425
P05389	60S acidic ribosomal protein P2 OS=Drosophila melanogaster GN=RpLP2 PE=1 SV=1	27		NM_139465	CG16762	2.94785
Q9NHD5	Probable N-acetyltransferase san OS=Drosophila melanogaster GN=san PE=1 SV=1	20.3333		NM_139852	CTCF	8.02875
A8JRE3	Without children, isoform B OS=Drosophila melanogaster GN=woc PE=4 SV=1	23.3333		NM_141227	slx1	5.9529
Q9VB55	Without children, isoform A OS=Drosophila melanogaster GN=woc PE=1 SV=2	23.3333		NR_048104	snoRNA:2R:9445410	6.31361
Q9VD07	CG12499 OS=Drosophila melanogaster GN=CG12499 PE=1 SV=2	22		NM_141237	CG14655	6.41397
O61444	MAP kinase kinase 4, isoform A OS=Drosophila melanogaster GN=Mkk4 PE=1 SV=1	13		NM_142316	Mettl4	8.21065
Q9VRV1	CG10289 OS=Drosophila melanogaster GN=CG10289 PE=1 SV=2	14.6667		NM_001144327	DIP-epsilon	9.54111
O16797-3	Isoform C of 60S ribosomal protein L3 OS=Drosophila melanogaster GN=RpL3	9.33333		NM_168757	Eip75B	9.15637
Q9VK63	CG5776 OS=Drosophila melanogaster GN=CG5776 PE=2 SV=1	12.6667		NM_140801	Nufip	7.40632
Q7K3D4	CG5482 OS=Drosophila melanogaster GN=CG5482 PE=1 SV=1	9.33333		NM_001300056	foi	6.9558
Q9VAH7	RE62393p OS=Drosophila melanogaster GN=yata PE=2 SV=1	10		NM_001300559	CG34355	5.34572
P54350	Wee1-like protein kinase OS=Drosophila melanogaster GN=wee PE=1 SV=2	8.33333		NM_176064	Hf	4.60789
Q960C5	CG6860, isoform A OS=Drosophila melanogaster GN=Lrch PE=1 SV=1	7.66667		NM_001169277	rdgB	7.27664
Q7JXU4	Nuclear GTP binding protein OS=Drosophila melanogaster GN=ns2 PE=1 SV=1	6.66667		NM_001103570	Ntf-2	10.7062
Q9VN44	FI07923p OS=Drosophila melanogaster GN=Karybeta3 PE=2 SV=1	24.3333		NM_134954	CG3513	4.39561
Q9XTL9	Glycogen phosphorylase OS=Drosophila melanogaster GN=GlyP PE=2 SV=2	15.6667		NM_135532	l(2)SH0834	11.1704
A4UZZ4	Phosphorylase OS=Drosophila melanogaster GN=GlyP PE=3 SV=1	15.6667		NM_001259054	salr	8.0248
Q9VNA5	Proteasome subunit beta type-4 OS=Drosophila melanogaster GN=Prosbeta7 PE=1 SV=1	14.3333		NM_135810	CG16956	3.21534
Q9VQX4	Nicotinate phosphoribosyltransferase OS=Drosophila melanogaster GN=CG3714 PE=2 SV=2	12.6667		NM_135817	CG16852	2.88935
Q9VQX4-2	Isoform 2 of Nicotinate phosphoribosyltransferase OS=Drosophila melanogaster GN=CG3714	12.6667		NM_057828	Cyt-c-p	7.84311
Q24117	Dynein light chain 1, cytoplasmic OS=Drosophila melanogaster GN=ctp PE=1 SV=1	10.6667		NM_001259718	MCU	4.47291
Q9VWH4	Probable isocitrate dehydrogenase [NAD] subunit alpha, mitochondrial OS=Drosophila melanogaster GN=l(1)G0156 PE=2 SV=1	12.6667		NM_168448	IRSp53	6.53694
Q9VWH4-2	Isoform A of Probable isocitrate dehydrogenase [NAD] subunit alpha, mitochondrial OS=Drosophila melanogaster GN=l(1)G0156	12.6667		NM_001299996	FMRFaR	7.89689
Q7YU05	LD13846p OS=Drosophila melanogaster GN=l(1)G0334 PE=2 SV=1	10.6667		NM_168417	CG32066	7.06834
Q7KSM5	Aos1 OS=Drosophila melanogaster GN=Aos1 PE=2 SV=1	14.3333		NM_001370038		5.59366
Q7K180	LD02709p OS=Drosophila melanogaster GN=Map60 PE=1 SV=1	17.6667		NM_140651	CG4101	8.92315
Q9I7P8	CG4365, isoform B OS=Drosophila melanogaster GN=CG4365 PE=1 SV=1	19.6667		NM_140999	Six4	3.38219
Q24169	Origin recognition complex subunit 5 OS=Drosophila melanogaster GN=Orc5 PE=2 SV=1	16		NM_001259954	CG43312	5.59024
Q9VNG2	CG1109, isoform A OS=Drosophila melanogaster GN=CG1109 PE=1 SV=2	13.6667		NM_001014659	slo	5.17908
Q7K0Y1	Ribosome biogenesis protein BOP1 homolog OS=Drosophila melanogaster GN=CG5033 PE=1 SV=1	13		NM_138101	CG42361	13.975
Q9XYZ4	Endo/exonuclease Mre11 OS=Drosophila melanogaster GN=mre11 PE=1 SV=1	14.6667		NM_001275207	CG43938	4.74797
A1A708-2	Isoform A of Uncharacterized protein CG4951 OS=Drosophila melanogaster GN=CG4951	7.33333		NM_001300471	CG6005	6.66978
Q9W4X9	Centromere/kinetochore protein zw10 OS=Drosophila melanogaster GN=mit(1)15 PE=1 SV=2	17.6667		NM_132595	CG15725	7.52794
Q9V411	Probable nucleolar GTP-binding protein 1 OS=Drosophila melanogaster GN=CG8801 PE=2 SV=1	9.33333		NM_139760	CG10472	5.43121
P42284-1	Isoform M of Longitudinals lacking protein, isoforms H/M/V OS=Drosophila melanogaster GN=lola	15.3333		NM_169943	CG31207	7.50295
P42284	Longitudinals lacking protein, isoforms H/M/V OS=Drosophila melanogaster GN=lola PE=1 SV=2	15.3333		NM_168616	CG32147	10.0251
Q7KQZ4	Longitudinals lacking protein, isoforms A/B/D/L OS=Drosophila melanogaster GN=lola PE=1 SV=1	15.3333		NM_143593	CG1542	8.22798
Q867Z4-5	Isoform T of Longitudinals lacking protein, isoforms F/I/K/T OS=Drosophila melanogaster GN=lola	15.3333		NM_141668	p23	10.6002
Q867Z4-3	Isoform K of Longitudinals lacking protein, isoforms F/I/K/T OS=Drosophila melanogaster GN=lola	15.3333		NM_141731	CG42795	9.60558
Q867Z4-2	Isoform F of Longitudinals lacking protein, isoforms F/I/K/T OS=Drosophila melanogaster GN=lola	15.3333		NR_124529	asRNA:CR45137	6.65399
Q9V5M3	Longitudinals lacking protein, isoforms N/O/W/X/Y OS=Drosophila melanogaster GN=lola PE=1 SV=3	15.3333		NR_167881	asRNA:CR46487	7.51361
Q9V5M6-5	Isoform Z of Longitudinals lacking protein, isoforms J/P/Q/S/Z OS=Drosophila melanogaster GN=lola	15.3333		NM_165475	Vha16-1	10.8012
Q9V5M6-3	Isoform Q of Longitudinals lacking protein, isoforms J/P/Q/S/Z OS=Drosophila melanogaster GN=lola	15.3333		NM_057453	Vha16-1	9.27359
Q9V5M6-4	Isoform S of Longitudinals lacking protein, isoforms J/P/Q/S/Z OS=Drosophila melanogaster GN=lola	15.3333		NM_079131	CG3594	8.646
Q9V5M6-2	Isoform J of Longitudinals lacking protein, isoforms J/P/Q/S/Z OS=Drosophila melanogaster GN=lola	15.3333		NM_137479	GstE1	10.434
Q9V5M3-2	Isoform O of Longitudinals lacking protein, isoforms N/O/W/X/Y OS=Drosophila melanogaster GN=lola	15.3333		NM_001316620	tau	10.0334
Q9V5M3-3	Isoform W of Longitudinals lacking protein, isoforms N/O/W/X/Y OS=Drosophila melanogaster GN=lola	15.3333		NM_079372	CkIIalpha-i1	8.98837
Q9V5M3-5	Isoform Y of Longitudinals lacking protein, isoforms N/O/W/X/Y OS=Drosophila melanogaster GN=lola	15.3333		NM_169081	Spec2	9.80379
Q7KQZ4-2	Isoform A of Longitudinals lacking protein, isoforms A/B/D/L OS=Drosophila melanogaster GN=lola	15.3333		NM_079626	Crz	14.4261
Q7KQZ4-4	Isoform L of Longitudinals lacking protein, isoforms A/B/D/L OS=Drosophila melanogaster GN=lola	15.3333		NM_141435	Dpck	11.8624
Q05547	Serine/threonine-protein phosphatase alpha-3 isoform OS=Drosophila melanogaster GN=Pp1-13C PE=1 SV=1	16		NM_001042993	conu	7.39718
Q86B87-13	Isoform 55.6 of Modifier of mdg4 OS=Drosophila melanogaster GN=mod(mdg4)	13		NM_001038873	Dso2	3.4238
P47825-2	Isoform C of Transcription initiation factor TFIID subunit 4 OS=Drosophila melanogaster GN=Taf4	13.6667		NM_001300685	CG15537	8.22833
A4V201	TBP-associated factor 4, isoform D OS=Drosophila melanogaster GN=Taf4 PE=4 SV=1	13.6667		NM_139922	CG13676	4.38711
P05205	Heterochromatin protein 1 OS=Drosophila melanogaster GN=Su(var)205 PE=1 SV=2	15.6667		NM_079112	Ak2	8.19771
Q9VEH0	Aluminum tubes, isoform A OS=Drosophila melanogaster GN=alt PE=1 SV=1	20		NM_001103588	CG15387	10.2562
Q960Y8	Aluminum tubes, isoform G OS=Drosophila melanogaster GN=alt PE=2 SV=1	19.3333		NM_001274614	Hn	4.10803
Q8SYG2	COP9 signalosome complex subunit 3 OS=Drosophila melanogaster GN=CSN3 PE=1 SV=2	15		NM_132695	CG10993	7.13181
Q86BP3	CG1091, isoform A OS=Drosophila melanogaster GN=CG1091 PE=2 SV=1	10.6667		NM_001274305	Glut1	7.22516
P83967	Actin, indirect flight muscle OS=Drosophila melanogaster GN=Act88F PE=1 SV=1	31.3333		NM_143425	Mesh1	7.29343
Q7KLW9	BcDNA.LD02793 OS=Drosophila melanogaster GN=Prp19 PE=1 SV=1	11		NR_123776	asRNA:CR45479	4.33487
Q9V3J8	Protein will die slowly OS=Drosophila melanogaster GN=wds PE=2 SV=1	14.6667		NM_135348	SLC5A11	7.44813
Q9VJY6	60S ribosomal protein L24 OS=Drosophila melanogaster GN=RpL24 PE=1 SV=1	18.6667		NM_140825	CG18135	9.02105
P55841	60S ribosomal protein L14 OS=Drosophila melanogaster GN=RpL14 PE=2 SV=1	12.3333		NM_132162	Atg5	11.2109
P36241	60S ribosomal protein L19 OS=Drosophila melanogaster GN=RpL19 PE=1 SV=2	12		NM_001104454	CG5028	7.95812
P05990-2	Isoform B of CAD protein OS=Drosophila melanogaster GN=r	24		NM_001258497	unc-13	6.33056
Q9VGF9	Aurora OS=Drosophila melanogaster GN=aur PE=2 SV=1	21.3333		NM_001299113	RpS26	4.77822
Q95083	Proteasome subunit alpha type-5 OS=Drosophila melanogaster GN=Prosalpha5 PE=1 SV=2	15		NM_140365	CG11267	13.1414
Q9I7X6	UPF0586 protein CG11596 OS=Drosophila melanogaster GN=CG11596 PE=1 SV=1	13.6667		NM_001259932	CG43219	7.44589
P49735	DNA replication licensing factor Mcm2 OS=Drosophila melanogaster GN=Mcm2 PE=1 SV=1	17.3333		NM_001274318	Rac1	7.2853
A8Y583	CG41099, isoform A OS=Drosophila melanogaster GN=CG41099 PE=4 SV=1	13.6667		NM_080203	l(3)87Df	10.9235
Q7KMH5	BcDNA.LD29892 OS=Drosophila melanogaster GN=BcDNA.LD29892 PE=2 SV=1	15.6667		NM_143057	CG11771	9.48102
Q8IMX0	Twin, isoform D OS=Drosophila melanogaster GN=twin PE=2 SV=1	15.3333		NM_136893	EndoG	10.2888
Q9VJJ0	Proteasome subunit beta type OS=Drosophila melanogaster GN=CG17331 PE=1 SV=1	10.3333		NM_001299058	yellow-b	3.14826
Q9VWD9	LD38919p OS=Drosophila melanogaster GN=Ubqn PE=1 SV=1	13.3333		NM_079356	Tak1	9.72139
P02516	Heat shock protein 23 OS=Drosophila melanogaster GN=Hsp23 PE=1 SV=2	8		NM_135359	CG7840	7.62072
Q8SWU7	GTP-binding protein CG1354 OS=Drosophila melanogaster GN=CG1354 PE=1 SV=1	7.66667		NM_164918	CG5096	5.49937
Q9VH48	Probable histone-arginine methyltransferase CARMER OS=Drosophila melanogaster GN=Art4 PE=1 SV=1	6.33333		NM_001273323	CG13398	7.38541
Q9VYW5	CG2247 OS=Drosophila melanogaster GN=CG2247 PE=1 SV=1	12.6667		NM_001259379	shot	5.76186
Q9VUQ1	CG7945, isoform B OS=Drosophila melanogaster GN=CG7945 PE=1 SV=2	7.33333		NM_001274512	DIP-delta	9.58128
Q9VJZ5	LD07294p OS=Drosophila melanogaster GN=Tap42 PE=2 SV=2	9.66667		NM_133071	CG15044	3.07692
P42207	Septin-1 OS=Drosophila melanogaster GN=Sep1 PE=1 SV=1	8		NM_001299978	CG12025	11.3112
Q9VJE6	CG6860, isoform B OS=Drosophila melanogaster GN=Lrch PE=4 SV=1	7.33333		NM_001275372	CG10979	9.96215
Q8IH18	CG32016, isoform B OS=Drosophila melanogaster GN=CG11097 PE=1 SV=1	7.33333		NM_079627	mRpL11	8.8024
Q86BR2	CG32016, isoform A OS=Drosophila melanogaster GN=CG32016 PE=1 SV=2	7.33333		NM_078872	bsf	10.3223
Q8T389	Endophilin B OS=Drosophila melanogaster GN=endoB PE=2 SV=1	6		NM_134824	CG16995	2.9666
Q8SYD9	Endophilin B, isoform A OS=Drosophila melanogaster GN=endoB PE=2 SV=1	6		NM_142416	CG7785	11.5377
Q9VTW1	CG4300, isoform B OS=Drosophila melanogaster GN=CG4300 PE=2 SV=1	5		NM_142162	CG6912	11.3487
Q9VTW0	CG4300, isoform A OS=Drosophila melanogaster GN=CG4300 PE=1 SV=1	5		NM_001015316	l(3)80Fj	12.0969
Q59E29	Failed axon connections, isoform D OS=Drosophila melanogaster GN=fax PE=4 SV=1	16		NM_143733	CG3719	11.6815
Q86BI4	Failed axon connections, isoform B OS=Drosophila melanogaster GN=fax PE=2 SV=1	16		NM_001169360	CaMKII	7.08098
Q9VS82	CG7546, isoform A OS=Drosophila melanogaster GN=CG7546 PE=1 SV=2	17.3333		NM_078575	dy	3.22344
B7Z0D3	CG7546, isoform D OS=Drosophila melanogaster GN=CG7546 PE=4 SV=1	17.3333		NM_134535	CG17068	9.33895
A1Z843	CG1371 OS=Drosophila melanogaster GN=CG1371 PE=4 SV=1	28		NR_124147	asRNA:CR44992	3.66657
Q8T0S6	Serine/threonine-protein kinase hippo OS=Drosophila melanogaster GN=hpo PE=1 SV=1	11.3333		NM_166178	Sema2a	9.91018
Q9VTQ9	AT06668p OS=Drosophila melanogaster GN=Rpt4R PE=1 SV=1	16		NM_137582	Oseg6	9.53725
P22769	Proteasome subunit alpha type-7-1 OS=Drosophila melanogaster GN=Pros28.1 PE=1 SV=2	17.3333		NM_167941	CG1275	9.44403
Q9XZJ4	Proteasome subunit alpha type-6 OS=Drosophila melanogaster GN=Prosalpha1 PE=2 SV=2	16.3333		NM_139757	Jon65Aii	5.33683
E1JGZ9	Proteasome subunit alpha type OS=Drosophila melanogaster GN=CG30382 PE=3 SV=1	16.3333		NM_140613	CG13042	11.4475
Q9W1Q8	LD05345p OS=Drosophila melanogaster GN=eIF2B-delta PE=1 SV=1	15.3333		NM_001300390	Nsf2	6.84408
Q0E8X6	eIF2B-delta, isoform B OS=Drosophila melanogaster GN=eIF2B-delta PE=1 SV=1	15.3333		NM_001275645	put	9.34032
Q8IGZ2	LP12034p OS=Drosophila melanogaster GN=TER94 PE=2 SV=1	15.6667		NM_142428	CG12321	9.25131
Q7K0Y1-2	Isoform B of Ribosome biogenesis protein BOP1 homolog OS=Drosophila melanogaster GN=CG5033	12.3333		NR_133436	lncRNA:CR46088	2.48743
Q9V3D6	Probable cleavage and polyadenylation specificity factor subunit 2 OS=Drosophila melanogaster GN=Cpsf100 PE=1 SV=1	18.3333		NM_079738	PolE1	6.07223
Q9V853	E3 ubiquitin-protein ligase Smurf1 OS=Drosophila melanogaster GN=lack PE=1 SV=3	16		NM_144298	Sem1	11.5357
Q9VAJ1	Condensin complex subunit 1 OS=Drosophila melanogaster GN=CAP-D2 PE=1 SV=1	18.3333		NM_141437	CG10098	13.1005
O16810	Origin recognition complex subunit 1 OS=Drosophila melanogaster GN=Orc1 PE=1 SV=2	7.33333		NM_078922	Cyp9b2	5.97238
Q9VDV2	AT06125p OS=Drosophila melanogaster GN=CG6195 PE=1 SV=1	10.3333		NM_164809	CSN8	10.3985
Q9NDJ2	Helicase domino OS=Drosophila melanogaster GN=dom PE=1 SV=2	15.6667		NM_001298894	YL-1	4.71863
Q8MLW2	Domino, isoform D OS=Drosophila melanogaster GN=dom PE=2 SV=1	15.6667		NM_001169494	bun	9.07373
Q86B87	Modifier of mdg4 OS=Drosophila melanogaster GN=mod(mdg4) PE=1 SV=1	13.3333		NM_001382204	CG43051	7.85751
Q9V436	26S proteasome regulatory complex subunit p30 OS=Drosophila melanogaster GN=Rpn12 PE=1 SV=1	17.3333		NM_144079	CG15024	9.34322
Q9W555	Delta-coatomer protein, isoform A OS=Drosophila melanogaster GN=deltaCOP PE=1 SV=1	22		NM_168509	CG32109	11.5072
Q7K7G0	Delta-coatomer protein, isoform B OS=Drosophila melanogaster GN=deltaCOP PE=2 SV=1	22		NM_057214	ab	4.79863
Q9V9M7	RE62581p OS=Drosophila melanogaster GN=RpL21 PE=2 SV=1	8.33333		NM_136426	Glo1	10.4351
O61602	Apontic OS=Drosophila melanogaster GN=apt PE=2 SV=1	17.3333		NM_136011	CadN2	5.62707
Q9W1M6	Apontic, isoform B OS=Drosophila melanogaster GN=apt PE=1 SV=2	17.3333		NM_134520	CG12655	7.1961
Q03334	40S ribosomal protein S13 OS=Drosophila melanogaster GN=RpS13 PE=2 SV=3	15.3333		NM_169352	CG31391	2.82418
Q9VG58	Major heat shock 70 kDa protein Bbb OS=Drosophila melanogaster GN=Hsp70Bbb PE=2 SV=2	15.3333		NM_001038725	Dyrk3	9.41459
Q8INI8	Major heat shock 70 kDa protein Ba OS=Drosophila melanogaster GN=Hsp70Ba PE=2 SV=2	15.3333		NM_001103400	sgg	5.76696
Q9BIS2	Major heat shock 70 kDa protein Bb OS=Drosophila melanogaster GN=Hsp70Bb PE=2 SV=2	15.3333		NM_001144474	dysc	5.51342
Q9BIR7	Major heat shock 70 kDa protein Bc OS=Drosophila melanogaster GN=Hsp70Bc PE=2 SV=2	15.3333		NM_001297853	CG14777	5.13153
Q86S05	Protein lingerer OS=Drosophila melanogaster GN=lig PE=1 SV=1	8.33333		NM_165344	CG9328	9.26648
E1JH02	Lingerer, isoform E OS=Drosophila melanogaster GN=lig PE=4 SV=1	8.33333		NM_001015159	Gfat1	3.72624
Q86S05-2	Isoform A of Protein lingerer OS=Drosophila melanogaster GN=lig	8.33333		NM_079062	edl	7.39688
Q86S05-3	Isoform B of Protein lingerer OS=Drosophila melanogaster GN=lig	8.33333		NM_001299038	CG44475	3.98179
P46223	60S ribosomal protein L7a OS=Drosophila melanogaster GN=RpL7A PE=2 SV=2	10.6667		NM_001275623	kmr	7.88998
P41126	60S ribosomal protein L13 OS=Drosophila melanogaster GN=RpL13 PE=1 SV=1	12.3333		NM_206054	CG12159	9.73454
Q9VPM7	CG17078 OS=Drosophila melanogaster GN=CG17078-RA PE=1 SV=2	18.3333		NM_058115	Taf10	11.4637
Q9I7X6-2	Isoform 2 of UPF0586 protein CG11596 OS=Drosophila melanogaster GN=CG11596	13.3333		NM_001169588	ap	3.99213
Q7KMM4	BcDNA.GH04962 OS=Drosophila melanogaster GN=BcDNA.GH04962 PE=2 SV=1	20.3333		NM_206082	lola	7.71734
Q8SX76	LD24646p OS=Drosophila melanogaster GN=pch2 PE=1 SV=1	14.6667		NM_079549	puc	8.32434
Q9VS83	CG7546, isoform B OS=Drosophila melanogaster GN=CG7546 PE=1 SV=3	15.6667		NM_137361	Vajk4	9.11068
B7Z0D4	CG7546, isoform C OS=Drosophila melanogaster GN=CG7546 PE=4 SV=1	15.6667		NM_001273473	CG31760	10.3457
Q9VL25	CG4901 OS=Drosophila melanogaster GN=CG4901 PE=2 SV=2	18.3333		NM_001014533	Vkor	9.15009
Q9W102	LD43280p OS=Drosophila melanogaster GN=Orc4 PE=2 SV=1	15		NM_137480	GstE2	11.3831
Q9VVU1	CG3902 OS=Drosophila melanogaster GN=CG3902-RA PE=2 SV=1	11.6667		NM_132078	CG11700	6.80817
Q9W499	FI02809p OS=Drosophila melanogaster GN=RpL35 PE=2 SV=2	8.66667		NM_001144222	CG4975	4.64883
P48598	Eukaryotic translation initiation factor 4E OS=Drosophila melanogaster GN=eIF-4E PE=1 SV=1	10		NM_001169824	pio	8.05644
P48598-2	Isoform II of Eukaryotic translation initiation factor 4E OS=Drosophila melanogaster GN=eIF-4E	9.66667		NM_144158	CG13038	4.78882
Q8SWU7-2	Isoform B of GTP-binding protein CG1354 OS=Drosophila melanogaster GN=CG1354	6.66667		NM_141095	Polr2H	9.63027
A1Z7K8	CG8235 OS=Drosophila melanogaster GN=CG8235 PE=4 SV=1	11.3333		NM_137292	RpS15	6.84598
O02649	60 kDa heat shock protein, mitochondrial OS=Drosophila melanogaster GN=Hsp60 PE=1 SV=3	10.6667		NM_142401	CG17806	8.68087
Q9VL07	LD02225p OS=Drosophila melanogaster GN=Utx PE=1 SV=3	9		NM_001300567	CG18428	6.34542
Q9VWK5	GH15225p OS=Drosophila melanogaster GN=Ulp1 PE=2 SV=1	10.6667		NM_078514	brk	7.20489
Q9V9W7	Rough deal OS=Drosophila melanogaster GN=rod PE=2 SV=2	10.6667		NM_142526	Cyp12a4	7.99888
Q9NJG9-2	Isoform 2 of Polycomb protein Su(z)12 OS=Drosophila melanogaster GN=Su(z)12	9		NM_057392	spn-B	6.56187
Q9VF78	Conserved oligomeric Golgi complex subunit 2 OS=Drosophila melanogaster GN=ldlCp PE=2 SV=1	9		NM_001272448	mei-P26	7.61232
Q8SZ38	CG12011 OS=Drosophila melanogaster GN=CG12011 PE=2 SV=1	7.66667		NM_001031951	CNMaR	9.21423
Q9VHJ8	SkpA associated protein, isoform A OS=Drosophila melanogaster GN=skap PE=1 SV=2	7.66667		NM_169046	CG31538	5.53965
Q95U38	GH10480p OS=Drosophila melanogaster GN=skap PE=2 SV=1	7.66667		NM_079214	Txl	11.1474
A1ZAB5	Protein KIAA0664 homolog OS=Drosophila melanogaster GN=CG8443 PE=1 SV=1	9		NM_167141	sws	5.28473
Q8SYL1	Lethal (2) 09851 OS=Drosophila melanogaster GN=l(2)09851 PE=2 SV=1	5		NM_135555	RfC3	7.63017
Q8MS38	CG33217 OS=Drosophila melanogaster GN=CG33217 PE=2 SV=1	7.33333		NR_124343	lncRNA:CR45332	9.26963
Q9VHL1	CG9839 OS=Drosophila melanogaster GN=CG9839 PE=2 SV=1	6		NM_001273867	Vps28	8.77353
Q7K0T7	LD33470p OS=Drosophila melanogaster GN=psq PE=2 SV=1	6.33333		NM_140237	Pldn	9.95975
A1Z8A4	Pipsqueak, isoform A OS=Drosophila melanogaster GN=psq PE=1 SV=1	6.33333		NM_132535	SelG	10.7081
A8DYJ1	Endophilin B, isoform C OS=Drosophila melanogaster GN=endoB PE=4 SV=1	5.66667		NR_123746	asRNA:CR45126	5.69931
A8DYJ0	Endophilin B, isoform D OS=Drosophila melanogaster GN=endoB PE=4 SV=1	5.66667		NM_132236	sdt	3.16547
Q8T479	AT12489p OS=Drosophila melanogaster GN=CG5180 PE=1 SV=1	4		NM_132304	Zpr1	8.80394
B7Z0N0	CG5180, isoform B OS=Drosophila melanogaster GN=CG5180 PE=4 SV=1	4		NM_001273318	CG13392	2.52148
A8DYB0	CG13185, isoform C OS=Drosophila melanogaster GN=CG13185 PE=4 SV=1	42.3333		NM_135560	holn1	9.70514
A1Z8Q2	CG13185, isoform B OS=Drosophila melanogaster GN=CG13185 PE=1 SV=1	42		NM_001103867	CG4409	11.1075
Q7KSN8	CG31368, isoform D OS=Drosophila melanogaster GN=CG31368 PE=1 SV=2	35		NM_139511	Cht7	8.03625
Q9VGG9	CG31368, isoform C OS=Drosophila melanogaster GN=CG31368 PE=1 SV=4	35		NM_140165	CG14147	8.79005
Q7K126	LD13864p OS=Drosophila melanogaster GN=l(2)NC136 PE=1 SV=1	14.3333		NM_057387	Sod1	14.8764
Q8T060	CG12304, isoform B OS=Drosophila melanogaster GN=CG12304-RB PE=2 SV=3	16.6667		NM_141937	CG17202	11.7032
Q9VHI8	CG11980, isoform A OS=Drosophila melanogaster GN=CG11980 PE=2 SV=2	13.3333		NM_001275867	AnxB9	3.62575
Q8INP8	CG11980, isoform B OS=Drosophila melanogaster GN=CG11980 PE=2 SV=1	13.3333		NM_001276136	SP1029	5.60142
Q8INP9	CG11980, isoform C OS=Drosophila melanogaster GN=CG11980 PE=2 SV=1	13.3333		NM_001110989	Alg-2	12.6614
Q9VFC8	Putative glycogen [starch] synthase OS=Drosophila melanogaster GN=CG6904 PE=1 SV=2	14.6667		NM_136155	CG10628	8.96823
Q9VFC8-2	Isoform B of Putative glycogen [starch] synthase OS=Drosophila melanogaster GN=CG6904	14.6667		NM_132059	CG4766	9.15465
Q9VUR1	Marionette OS=Drosophila melanogaster GN=mrn PE=1 SV=1	9.33333		NM_001273165	CG14024	10.4822
Q9VHP0	ATP-dependent RNA helicase bel OS=Drosophila melanogaster GN=bel PE=1 SV=1	21.6667		NM_001042879	CG34132	11.9372
Q9VFT4	AT27578p OS=Drosophila melanogaster GN=rin PE=2 SV=1	13.3333		NM_169678	glob1	7.9936
Q8SX89	Kugelkern, isoform A OS=Drosophila melanogaster GN=kuk PE=1 SV=1	15		NM_001275683	Acyp2	7.67104
O46106	Splicing factor 3A subunit 3 OS=Drosophila melanogaster GN=noi PE=1 SV=1	12.3333		NM_167224	alpha-Man-Ia	8.4279
Q8MRG6	CG7757, isoform B OS=Drosophila melanogaster GN=CG7757 PE=2 SV=1	14.3333		NM_001273367	Nckx30C	12.8707
Q8MST5	Beta-Tubulin at 97EF, isoform B OS=Drosophila melanogaster GN=betaTub97EF PE=2 SV=1	15.3333		NR_047944	snoRNA:SC35-b	3.33928
Q9V3D6-2	Isoform B of Probable cleavage and polyadenylation specificity factor subunit 2 OS=Drosophila melanogaster GN=Cpsf100	17		NM_135993	CG15141	10.4839
Q9VNB9	RE17737p OS=Drosophila melanogaster GN=RpL35A PE=2 SV=1	10.3333		NM_136582	AIMP1	9.71382
Q9VPB0	CG3680 OS=Drosophila melanogaster GN=CG3680 PE=1 SV=2	10.3333		NM_001273912	Mef2	4.39599
Q9VWE6	Protein ELYS homolog OS=Drosophila melanogaster GN=CG14215 PE=1 SV=2	10.3333		NM_001274253	mthl8	9.33146
Q9VL18	Probable elongation factor 1-delta OS=Drosophila melanogaster GN=eEF1delta PE=1 SV=1	7		NM_080035	SmD1	8.49501
Q9VV75	AT02348p OS=Drosophila melanogaster GN=CG4169 PE=2 SV=1	11.3333		NM_001316528	Vps24	7.30363
O96827	Probable elongation factor 1-beta OS=Drosophila melanogaster GN=Ef1beta PE=1 SV=3	6.66667		NM_057773	Mcm2	3.50391
Q7K159	LD06557p OS=Drosophila melanogaster GN=mip40 PE=1 SV=1	13		NR_074015	asRNA:CR44095	5.99042
Q24472	Retinoblastoma family protein OS=Drosophila melanogaster GN=Rbf PE=1 SV=2	17.3333		NM_001274185	RIC-3	5.16446
Q86B87-25	Isoform 59.0 of Modifier of mdg4 OS=Drosophila melanogaster GN=mod(mdg4)	12.3333		NM_141521	Nazo	2.84871
Q86B87-6	Isoform I of Modifier of mdg4 OS=Drosophila melanogaster GN=mod(mdg4)	12		NM_001144534	mtd	3.24405
Q9VD51	Probable ATP-dependent RNA helicase pitchoune OS=Drosophila melanogaster GN=pit PE=2 SV=2	14.6667		NM_001272567	Pde9	12.2202
Q7KU78	CG10077, isoform C OS=Drosophila melanogaster GN=CG10077 PE=3 SV=1	18		NM_079811	Ets98B	6.11438
Q95RL2	LD21608p OS=Drosophila melanogaster GN=row PE=2 SV=1	18.3333		NM_134917	CG15406	2.63578
Q9NBD7	CLIP-associating protein OS=Drosophila melanogaster GN=chb PE=1 SV=1	14.6667		NM_139635	CG15014	7.84523
A1Z9E2	Protein lin-54 homolog OS=Drosophila melanogaster GN=mip120 PE=1 SV=1	17.6667		NM_079270	Hsp67Bc	13.5922
E1JH59	Myb-interacting protein 120, isoform B OS=Drosophila melanogaster GN=mip120 PE=4 SV=1	17.6667		NM_167657	Idh3a	11.6671
Q7K0X3	CG2469, isoform A OS=Drosophila melanogaster GN=CG2469 PE=1 SV=1	10.6667		NM_140945	FRG1	10.6828
Q9VTE6	CG7839 OS=Drosophila melanogaster GN=CG7839 PE=1 SV=3	16		NM_135923	Ku80	7.87799
Q8MLR4	Apontic, isoform E OS=Drosophila melanogaster GN=apt PE=2 SV=1	16.3333		NM_001347775	DIP-lambda	12.4861
O61345	Protein penguin OS=Drosophila melanogaster GN=pen PE=2 SV=1	17.3333		NM_001260082	FoxP	11.6534
Q9XZ19	CG3909 OS=Drosophila melanogaster GN=CG3909 PE=1 SV=1	8.33333		NM_142437	Non3	9.60148
Q9VBN5	60S ribosomal protein L27 OS=Drosophila melanogaster GN=RpL27 PE=1 SV=1	8.66667		NM_001258519	Appl	3.18516
Q9VJ74	CG10333 OS=Drosophila melanogaster GN=CG10333 PE=2 SV=2	5.33333		NM_140996	Pex14	11.1364
Q9VS34	60S ribosomal protein L18 OS=Drosophila melanogaster GN=RpL18 PE=1 SV=1	6.33333		NM_001260115	pros	8.90122
D1Z3A1	MIP15344p OS=Drosophila melanogaster GN=RpL28 PE=2 SV=1	10.6667		NM_143679	MED26	8.04213
Q9VZS5	60S ribosomal protein L28 OS=Drosophila melanogaster GN=RpL28 PE=1 SV=1	10.6667		NM_001272856	Rab21	2.82938
Q9VX31	CG8211 OS=Drosophila melanogaster GN=CG8211 PE=2 SV=2	24.3333		NM_079266	Dhpr	2.15745
Q9VK44	CG9934, isoform A OS=Drosophila melanogaster GN=CG9934 PE=1 SV=1	16		NM_141562	CG11760	4.14612
Q7PLS8-2	Isoform B of Integrator complex subunit 3 homolog OS=Drosophila melanogaster GN=CG17665	20.6667		NM_143324	HSPBAP1	9.24222
P40301	Proteasome subunit alpha type-2 OS=Drosophila melanogaster GN=Pros25 PE=2 SV=1	12.3333		NM_139835	mRpL50	11.3843
Q9VE51	Cleavage and polyadenylation specificity factor 73 OS=Drosophila melanogaster GN=Cpsf73 PE=1 SV=2	16.3333		NM_176728	inaE	6.55429
Q9W229	40S ribosomal protein S24 OS=Drosophila melanogaster GN=RpS24 PE=2 SV=1	12		NM_001014527	Asx	3.47663
Q8SWR8	Ataxin-2 homolog OS=Drosophila melanogaster GN=Atx2 PE=1 SV=1	12.6667		NM_135349	CG8419	3.21743
P08970	Protein suppressor of hairy wing OS=Drosophila melanogaster GN=su(Hw) PE=1 SV=2	14		NM_001299946	uzip	9.1013
Q9VWH7	6-phosphofructo 2-kinase/fructose 2,6-bisphosphatase long form OS=Drosophila melanogaster GN=Pfrx PE=1 SV=2	12.6667		NM_137380	CG4866	10.2738
Q0KHQ6	6-phosphofructo-2-kinase, isoform A OS=Drosophila melanogaster GN=Pfrx PE=2 SV=1	12.6667		NR_124352	lncRNA:CR44900	5.6484
Q9VIK9	Methyltransferase-like protein 13 OS=Drosophila melanogaster GN=CG2614 PE=2 SV=1	12		NM_001202252	CG42675	3.9726
Q9VKB2	Ced-12 OS=Drosophila melanogaster GN=Ced-12 PE=2 SV=1	11.6667		NR_167863	lncRNA:CR46477	4.34531
Q9VRX7	CG8368, isoform A OS=Drosophila melanogaster GN=CG8368 PE=1 SV=1	10.3333		NM_132610	CG4404	10.7196
Q9VIZ0	Probable DNA-directed RNA polymerases I and III subunit RPAC2 OS=Drosophila melanogaster GN=l(2)37Cg PE=1 SV=1	8.66667		NM_001273449	ab	8.94624
Q8SWR8-2	Isoform A of Ataxin-2 homolog OS=Drosophila melanogaster GN=Atx2	11		NM_142510	snRNP-U1-C	9.5994
Q8SWR8-3	Isoform C of Ataxin-2 homolog OS=Drosophila melanogaster GN=Atx2	11		NM_001260319	CG43093	4.7547
Q8MT18	CG5028, isoform A OS=Drosophila melanogaster GN=CG5028 PE=2 SV=1	8.66667		NM_001103885	CG30460	7.39016
A8JRB8	CG5028, isoform C OS=Drosophila melanogaster GN=CG5028-RC PE=2 SV=1	8.33333		NM_001043186	mRpS5	5.385
A8JRC1	CG5028, isoform D OS=Drosophila melanogaster GN=CG5028 PE=4 SV=1	8.33333		NM_078752	mRpL24	12.1531
Q76NQ3	Utx, isoform B OS=Drosophila melanogaster GN=Utx PE=1 SV=1	8.66667		NM_164939	CG31871	5.40603
P48608	Protein diaphanous OS=Drosophila melanogaster GN=dia PE=1 SV=2	8.33333		NM_166244	CG30109	10.2754
A4UZL5	Glutathione S transferase S1, isoform C OS=Drosophila melanogaster GN=GstS1 PE=4 SV=1	3.66667		NM_001144423	CG8620	3.64512
P41043	Glutathione S-transferase S1 OS=Drosophila melanogaster GN=GstS1 PE=1 SV=2	3.66667		NM_001170048	CG2082	6.89715
Q9W4C4	GM14014p OS=Drosophila melanogaster GN=yu PE=2 SV=2	8		NM_141557	CG8043	8.49909
Q7KVW1	RE73736p OS=Drosophila melanogaster GN=yu PE=1 SV=1	8		NM_132224	Gbeta5	14.484
Q9VLJ8	Adenylyltransferase and sulfurtransferase MOCS3 OS=Drosophila melanogaster GN=CG13090 PE=1 SV=1	7.66667		NM_134744	CG14342	2.61072
Q9V9V0	CstF-50, isoform A OS=Drosophila melanogaster GN=CstF-50 PE=1 SV=1	7.66667		NM_057270	LanB1	9.21549
Q9V428	Icarus OS=Drosophila melanogaster GN=ics PE=1 SV=2	6.33333		NM_001273974	Mtor	5.04066
Q9VP22	Cyclin-dependent kinase 12 OS=Drosophila melanogaster GN=Cdk12 PE=1 SV=1	6.66667		NM_139645	CG15021	9.03506
Q9VYQ8	Ubiquitin carboxyl-terminal hydrolase 7 OS=Drosophila melanogaster GN=Usp7 PE=1 SV=1	5		NM_139768	CG10469	6.02921
Q9VBY2	CG11920 OS=Drosophila melanogaster GN=CG11920-RA PE=1 SV=1	5.66667		NM_001275568	Cog1	5.88065
Q9VVB7	FI02842p OS=Drosophila melanogaster GN=Lmpt PE=2 SV=2	3.66667		NR_125058	lncRNA:CR45159	5.02128
Q7KUQ5	Limpet, isoform F OS=Drosophila melanogaster GN=Lmpt PE=2 SV=1	3.66667		NM_130600	Coa8	6.87479
Q9VQ26	Rab3 GTPase-activating protein catalytic subunit OS=Drosophila melanogaster GN=CG31935 PE=1 SV=2	33.3333		NM_165039	Tap42	9.39041
Q94517	Histone deacetylase Rpd3 OS=Drosophila melanogaster GN=Rpd3 PE=1 SV=2	20.3333		NM_136150	PCNA2	8.82741
Q9VN58	CG42574 OS=Drosophila melanogaster GN=CG42574 PE=1 SV=4	12		NR_133116	lncRNA:CR44206	3.83787
Q9VPL9	KISMET-L long isoform OS=Drosophila melanogaster GN=kis PE=2 SV=3	15.6667		NM_143305	CG13978	4.49894
B7Z002	Kismet, isoform C OS=Drosophila melanogaster GN=kis PE=4 SV=1	15.6667		NM_001272707	wcy	6.46064
Q9VGP9	KP78a OS=Drosophila melanogaster GN=KP78a PE=2 SV=1	11		NM_057496	grh	5.3243
Q24572	Probable histone-binding protein Caf1 OS=Drosophila melanogaster GN=Caf1 PE=1 SV=1	21		NM_137806	MED16	7.16191
Q95029	Cathepsin L OS=Drosophila melanogaster GN=Cp1 PE=1 SV=2	7.66667		NM_206264	ckd	3.84148
Q95029-2	Isoform A of Cathepsin L OS=Drosophila melanogaster GN=Cp1	7.66667		NM_143453	CG7582	9.74394
Q9VNF6	MTA1-like, isoform A OS=Drosophila melanogaster GN=MTA1-like PE=4 SV=2	15.3333		NM_206004	brat	10.8524
Q9VJQ4	mRNA cap guanine-N7 methyltransferase OS=Drosophila melanogaster GN=l(2)35Bd PE=1 SV=2	11.3333		NM_137568	fest	7.15559
Q9VNF7	MTA1-like, isoform B OS=Drosophila melanogaster GN=MTA1-like PE=4 SV=2	15.3333		NM_168344	ghi	13.2246
Q9VAX7	Beta-Tubulin at 97EF, isoform A OS=Drosophila melanogaster GN=betaTub97EF PE=2 SV=2	14.6667		NM_139621	CG1265	13.1018
Q9VWZ1	Diskette OS=Drosophila melanogaster GN=dik PE=1 SV=1	5.66667		NM_143190	CG42235	6.35907
Q86BM5	A kinase anchor protein 200, isoform D OS=Drosophila melanogaster GN=Akap200 PE=1 SV=1	6.66667		NM_143000	CG17782	2.48315
Q9VPR5	CG2807 OS=Drosophila melanogaster GN=CG2807 PE=1 SV=2	16.6667		NM_165394	eEF2	7.11653
Q86B87-22	Isoform mod1.9 of Modifier of mdg4 OS=Drosophila melanogaster GN=mod(mdg4)	11		NM_136505	sand	4.33184
Q86B87-12	Isoform S of Modifier of mdg4 OS=Drosophila melanogaster GN=mod(mdg4)	12.6667		NM_137274	CG4282	8.55045
Q86B87-26	Isoform mod1.8 of Modifier of mdg4 OS=Drosophila melanogaster GN=mod(mdg4)	11.6667		NM_137715	LSm1	8.34073
Q9VBU9	Ribosomal protein S27 OS=Drosophila melanogaster GN=RpS27 PE=2 SV=1	12		NM_001275170	CG17147	2.73769
A1ZAK1	CG5859 OS=Drosophila melanogaster GN=CG5859-RA PE=2 SV=1	12.6667		NM_168126	sif	2.36755
Q9VQ93	LD23816p OS=Drosophila melanogaster GN=l(2)s5379 PE=1 SV=1	8		NM_142176	CG31344	11.2847
P48159	60S ribosomal protein L23 OS=Drosophila melanogaster GN=RpL23 PE=1 SV=2	19		NM_138123	TyrRS-m	8.83914
Q24319	Dolichyl-diphosphooligosaccharide--protein glycosyltransferase 48 kDa subunit OS=Drosophila melanogaster GN=Ost48 PE=2 SV=2	14.3333		NM_168491	Nrx-IV	2.89861
Q9W2I4	CG30390 OS=Drosophila melanogaster GN=Sgf29 PE=2 SV=2	7		NM_135936	PRL-1	11.0112
Q9VLN1	CG17293 OS=Drosophila melanogaster GN=CG17293 PE=1 SV=1	10.6667		NM_135938	CG4935	8.23956
Q86BB4	Transforming acidic coiled-coil protein, isoform E OS=Drosophila melanogaster GN=tacc PE=2 SV=1	9		NR_048103	snoRNA:2R:9445205	5.64295
E2QD65	Ribosomal protein S19a, isoform C OS=Drosophila melanogaster GN=RpS19a PE=4 SV=1	15.3333		NM_079196	tipE	8.57749
P39018	40S ribosomal protein S19a OS=Drosophila melanogaster GN=RpS19a PE=2 SV=3	15.3333		NM_001298754	CG11319	11.0313
Q9W237	40S ribosomal protein S16 OS=Drosophila melanogaster GN=RpS16 PE=2 SV=1	17.3333		NM_176551	CG33108	8.19878
A1Z8P9	Megator OS=Drosophila melanogaster GN=Mtor PE=1 SV=1	10.3333		NM_057637	ox	13.198
P08266	DNA-directed RNA polymerase II subunit RPB2 OS=Drosophila melanogaster GN=RpII140 PE=2 SV=2	28		NM_078742	Ptpa	10.4148
Q9W1A2	N-alpha-acetyltransferase, 35 NatC auxiliary subunit homolog OS=Drosophila melanogaster GN=CG4065 PE=1 SV=1	14		NM_138188	CG1231	11.5172
Q9W1A2-2	Isoform B of N-alpha-acetyltransferase, 35 NatC auxiliary subunit homolog OS=Drosophila melanogaster GN=CG4065	14		NM_140055	Bet3	9.67976
Q24246-12	Isoform 5b of Cytoplasmic dynein 1 intermediate chain OS=Drosophila melanogaster GN=sw	13		NM_139468	CG1146	4.54044
Q24246-10	Isoform 4 of Cytoplasmic dynein 1 intermediate chain OS=Drosophila melanogaster GN=sw	13		NM_001275323	CG1090	4.64242
Q24246-6	Isoform 2b of Cytoplasmic dynein 1 intermediate chain OS=Drosophila melanogaster GN=sw	13		NM_140068	pall	10.6927
Q24246-7	Isoform 2c of Cytoplasmic dynein 1 intermediate chain OS=Drosophila melanogaster GN=sw	13		NM_142695	CG5810	2.89521
Q24246-4	Isoform 1c of Cytoplasmic dynein 1 intermediate chain OS=Drosophila melanogaster GN=sw	13		NR_003122	asRNA:Eig63F-2	4.63557
Q24246-5	Isoform 2a of Cytoplasmic dynein 1 intermediate chain OS=Drosophila melanogaster GN=sw	13		NM_001274670	Fhos	3.2971
Q24246-8	Isoform 3a of Cytoplasmic dynein 1 intermediate chain OS=Drosophila melanogaster GN=sw	13		NM_001316576	Octbeta2R	8.88134
Q24246-9	Isoform 3b of Cytoplasmic dynein 1 intermediate chain OS=Drosophila melanogaster GN=sw	13		NM_168741	Eip74EF	5.68839
Q24246-2	Isoform 1a of Cytoplasmic dynein 1 intermediate chain OS=Drosophila melanogaster GN=sw	13		NR_002491	snoRNA:Psi28S-3186	5.89995
Q24246-3	Isoform 1b of Cytoplasmic dynein 1 intermediate chain OS=Drosophila melanogaster GN=sw	13		NM_206279	Usp47	3.68378
A4V4T4	SD27396p OS=Drosophila melanogaster GN=sw PE=2 SV=1	13		NM_169566	rdx	9.90691
Q24246	Cytoplasmic dynein 1 intermediate chain OS=Drosophila melanogaster GN=sw PE=1 SV=3	13		NR_125059	lncRNA:CR45597	6.17398
A8Y564	Dead box protein 80, isoform C OS=Drosophila melanogaster GN=Dbp80 PE=4 SV=1	10.6667		NM_170125	Slimp	7.34299
Q9VWF2	Supporter of activation of yellow protein OS=Drosophila melanogaster GN=e(y)3 PE=2 SV=3	11		NM_001038795	mon2	8.97121
Q9I7X6-3	Isoform 3 of UPF0586 protein CG11596 OS=Drosophila melanogaster GN=CG11596	10.3333		NR_124373	lncRNA:CR44738	7.20176
Q9W1G7	LD21576p OS=Drosophila melanogaster GN=Nap1 PE=2 SV=1	14.6667		NM_136136	Dpm1	9.82762
Q9VPB7	CG11399 OS=Drosophila melanogaster GN=CG11399 PE=2 SV=1	13.3333		NM_001202003	Kank	4.31597
E1JJN1	Ubiquitin carrier protein OS=Drosophila melanogaster GN=ben PE=3 SV=1	10.6667		NM_132577	CG2556	5.63882
P35128	Ubiquitin-conjugating enzyme E2 N OS=Drosophila melanogaster GN=ben PE=2 SV=1	10.6667		NM_001272930	CG4887	5.1403
A1ZA22	eIF2B-gamma OS=Drosophila melanogaster GN=eIF2B-gamma PE=1 SV=1	12.3333		NR_124307	lncRNA:CR44994	4.84426
A4V4S5	Carnation, isoform B OS=Drosophila melanogaster GN=car PE=4 SV=1	12		NM_001103863	sli	10.5998
Q9Y1I2	Vacuolar protein sorting-associated protein 33A OS=Drosophila melanogaster GN=car PE=1 SV=1	12		NM_057336	pn	10.4139
Q9VB62	DNA polymerase alpha subunit B OS=Drosophila melanogaster GN=DNApol-alpha73 PE=1 SV=2	7.66667		NM_166066	ave	10.5381
Q9VCF8	CG5854, isoform A OS=Drosophila melanogaster GN=CG5854 PE=1 SV=1	9.33333		NR_073616	asRNA:CR44027	3.9516
Q8MQK5	CG7945, isoform C OS=Drosophila melanogaster GN=CG7945 PE=2 SV=1	6		NM_001272275	Myc	7.111
E1JGN7	Bancal, isoform E OS=Drosophila melanogaster GN=bl PE=4 SV=1	9		NM_078611	mRpL3	10.4785
A1ZBW1	Bancal, isoform A OS=Drosophila melanogaster GN=bl PE=2 SV=1	9		NM_135448	CG31883	4.77026
A1ZBW0	Bancal, isoform C OS=Drosophila melanogaster GN=bl PE=2 SV=1	9		NM_138056	nord	12.0354
Q9VYE9	CG1622 OS=Drosophila melanogaster GN=CG1622-RA PE=1 SV=1	7.33333		NM_001169979	pHCl-1	3.79243
P42124	Histone-lysine N-methyltransferase E(z) OS=Drosophila melanogaster GN=E(z) PE=1 SV=2	9		NM_001169832	Vdup1	4.14588
P29845	Heat shock 70 kDa protein cognate 5 OS=Drosophila melanogaster GN=Hsc70-5 PE=1 SV=2	6.33333		NM_001274402	msn	5.98381
Q8IMG2	CstF-50, isoform B OS=Drosophila melanogaster GN=CstF-50 PE=1 SV=1	7		NM_140915	CG14183	6.92913
Q7KMG7	Ercc1 OS=Drosophila melanogaster GN=Ercc1 PE=1 SV=1	6.66667		NM_001316533	Tango9	2.92982
A8JRI1	Hephaestus, isoform L OS=Drosophila melanogaster GN=heph PE=4 SV=1	7.33333		NM_079644		5.02708
Q7KRS7	Hephaestus, isoform G OS=Drosophila melanogaster GN=heph PE=2 SV=1	7.33333		NM_142295	Sdhaf3	10.3809
Q8IMF8	Hephaestus, isoform C OS=Drosophila melanogaster GN=heph PE=2 SV=1	7.33333		NR_125205	lncRNA:CR44946	3.87145
Q8WR53	Hephaestus OS=Drosophila melanogaster GN=heph PE=1 SV=1	7.33333		NM_143273	Cpr97Eb	12.2121
Q95UI6	Hephaestus OS=Drosophila melanogaster GN=heph PE=2 SV=1	7.33333		NM_143427	Cisd2	13.2142
Q9W4R1	CG2875, isoform A OS=Drosophila melanogaster GN=CG2875 PE=2 SV=1	8.66667		NR_073822	lncRNA:CR43765	2.45187
Q9W4R2	CG2875, isoform B OS=Drosophila melanogaster GN=CG2875-RB PE=2 SV=1	8.66667		NM_139693	CG10674	8.49193
Q9V7P1	U3 small nucleolar RNA-associated protein 18 homolog OS=Drosophila melanogaster GN=wcd PE=1 SV=1	6.33333		NM_001259733	Sarm	7.0172
Q9VUB5	CG9007 OS=Drosophila melanogaster GN=CG9007 PE=1 SV=3	4.66667		NR_133305	lncRNA:CR45962	8.23777
Q9GQN0	Ran-binding protein 16 OS=Drosophila melanogaster GN=Ranbp16 PE=2 SV=1	5.66667		NM_001274914	shd	2.44352
Q9VWQ6	CG18259 OS=Drosophila melanogaster GN=CG18259-RA PE=1 SV=2	5.33333		NM_141106	CG7370	2.49372
Q5LJZ2	CG40351, isoform A OS=Drosophila melanogaster GN=CG40351 PE=1 SV=1	5		NM_170357	nenya	2.69481
Q9VWQ3	CG6961 OS=Drosophila melanogaster GN=CG6961 PE=1 SV=2	5.33333		NM_136858	CG13192	9.97271
Q27597	NADPH--cytochrome P450 reductase OS=Drosophila melanogaster GN=Cpr PE=2 SV=2	3.33333		NM_137273	CG8060	9.00325
Q8IPJ7	Cytochrome P450 reductase, isoform B OS=Drosophila melanogaster GN=Cpr PE=2 SV=1	3.33333		NM_001272381	ct	11.9977
Q9VL00	Ubiquitin thioesterase otubain-like OS=Drosophila melanogaster GN=CG4968 PE=1 SV=1	3.33333		NM_001015476	ND-AGGG	8.01301
Q9VC93	Dis3 OS=Drosophila melanogaster GN=Dis3 PE=1 SV=1	4		NM_001103789	SLO2	6.80055
Q8T3L1	Lethal (2) 44DEa, isoform A OS=Drosophila melanogaster GN=Acsl PE=2 SV=1	16.6667		NM_167476	ND-20	2.37865
A1Z7H2	Lethal (2) 44DEa, isoform D OS=Drosophila melanogaster GN=Acsl PE=4 SV=1	16.6667		NM_168512	Vps13D	8.49851
A1Z7H3	Lethal (2) 44DEa, isoform C OS=Drosophila melanogaster GN=Acsl PE=4 SV=1	16.6667		NM_078971	iotaTry	3.22534
Q9VEQ2	CG3678 OS=Drosophila melanogaster GN=CG17556-RA PE=1 SV=2	8		NR_048276	lncRNA:CR43432	6.42783
Q9VEQ1	CG17556 OS=Drosophila melanogaster GN=CG17556-RA PE=2 SV=1	7.66667		NM_169529	sqd	11.0538
Q9VT41	Deflated OS=Drosophila melanogaster GN=defl PE=2 SV=1	26		NM_134279	shn	5.36428
Q9VKK1	Enhancer of mRNA-decapping protein 4 homolog OS=Drosophila melanogaster GN=Ge-1 PE=1 SV=2	25.3333		NM_001299520	CG8157	5.15642
E1JIL4	Chromatin assembly factor 1 subunit, isoform B OS=Drosophila melanogaster GN=Caf1 PE=2 SV=1	19.6667		NM_137659	DMAP1	10.236
A8DY67	CG11198, isoform D OS=Drosophila melanogaster GN=ACC PE=4 SV=1	30.3333		NM_001202128	Sh3beta	4.16529
A1Z784	CG11198, isoform A OS=Drosophila melanogaster GN=ACC PE=1 SV=1	30.3333		NM_130672	CG2712	7.58776
O61267-2	Isoform Short of Ovarian-specific serine/threonine-protein kinase Lok OS=Drosophila melanogaster GN=lok	12.6667		NM_167482	Muc14A	4.27462
A4V0X0	Loki, isoform C OS=Drosophila melanogaster GN=lok PE=4 SV=1	12.6667		NM_135573	CG7384	6.52391
B7Z0T5	MTA1-like, isoform C OS=Drosophila melanogaster GN=MTA1-like PE=4 SV=1	14.6667		NM_057753	SdhB	12.7742
Q9VKB9	Rab3 GTPase-activating protein regulatory subunit OS=Drosophila melanogaster GN=rab3-GAP PE=1 SV=2	23		NM_079393	Mo25	9.59402
Q9VQ78	CG7261 OS=Drosophila melanogaster GN=CG7261 PE=2 SV=1	16		NM_169510	Dic1	6.28995
Q9VW10	CG9300 OS=Drosophila melanogaster GN=CG9300 PE=2 SV=1	10.6667		NM_144156	CG7630	15.4023
Q7K5K3	CG11876, isoform A OS=Drosophila melanogaster GN=CG11876 PE=1 SV=1	9.33333		NM_057856	angel	10.2081
Q9V7D2	V-type proton ATPase subunit D 1 OS=Drosophila melanogaster GN=Vha36-1 PE=1 SV=1	11.3333		NM_001259968	CG40045	6.46845
Q9VA54	Rpt6R OS=Drosophila melanogaster GN=Rpt6R PE=1 SV=1	13.3333		NM_079682	ort	8.87379
Q7KR04	40S ribosomal protein S15Ab OS=Drosophila melanogaster GN=RpS15Ab PE=2 SV=3	12.3333		NM_079619	poly	7.54228
Q9W0T7	CG16940, isoform A OS=Drosophila melanogaster GN=CG16940 PE=2 SV=2	14.3333		NM_057511	N	6.48793
Q8IRJ7	CG16940, isoform C OS=Drosophila melanogaster GN=CG16940-RC PE=1 SV=1	14.3333		NM_057515	inaC	8.25359
Q9VL18-2	Isoform A of Probable elongation factor 1-delta OS=Drosophila melanogaster GN=eEF1delta	6		NM_135102	DIP-eta	5.84992
O76521	FI03727p OS=Drosophila melanogaster GN=Kap-alpha1 PE=1 SV=1	11.3333		NM_140591	PDCD-5	10.0665
Q9W4Z9	CG3071 OS=Drosophila melanogaster GN=EG:25E8.3 PE=1 SV=1	9.33333		NM_140301	CG11529	4.481
Q9W396	FI06908p OS=Drosophila melanogaster GN=HP1b PE=1 SV=1	11.3333		NM_001272946	haf	8.24509
Q86B87-4	Isoform 62.3 of Modifier of mdg4 OS=Drosophila melanogaster GN=mod(mdg4)	12.3333		NM_001273175	CG14006	2.63924
Q86B87-3	Isoform N of Modifier of mdg4 OS=Drosophila melanogaster GN=mod(mdg4)	11		NM_137684	CG9344	9.87765
Q86B87-7	Isoform P of Modifier of mdg4 OS=Drosophila melanogaster GN=mod(mdg4)	11.3333		NM_001274769	Irbp18	6.55924
Q86B87-9	Isoform C of Modifier of mdg4 OS=Drosophila melanogaster GN=mod(mdg4)	11.3333		NM_168903	Aef1	9.71871
Q9NDJ2-2	Isoform B of Helicase domino OS=Drosophila melanogaster GN=dom	13.3333		NM_001300468	CG31224	5.68719
Q9W0M7	CG13900, isoform A OS=Drosophila melanogaster GN=CG13900-RA PE=2 SV=2	23.3333		NM_140433	CG13484	9.28247
Q9V4D4	Bip2 OS=Drosophila melanogaster GN=bip2 PE=1 SV=1	4.33333		NM_058135	fj	7.30167
Q9VKC1	CG5317, isoform A OS=Drosophila melanogaster GN=RpL7-like PE=2 SV=2	9.33333		NM_136199	CG2611	9.59397
Q7K148	Proteasome subunit beta type OS=Drosophila melanogaster GN=Prosbeta5 PE=1 SV=1	11.6667		NM_133029	CG7772	9.47447
Q8T6B9	Poly(U)-binding-splicing factor half pint OS=Drosophila melanogaster GN=pUf68 PE=1 SV=2	6.33333		NM_001299047	crp	7.54598
P41092	60S ribosomal protein L27a OS=Drosophila melanogaster GN=RpL27A PE=2 SV=2	8.66667		NM_001299330	Pal1	6.98491
P04359	60S ribosomal protein L32 OS=Drosophila melanogaster GN=RpL32 PE=1 SV=3	7.33333		NM_001299216	Cyp6w1	4.26283
Q9VJZ7	Ribosomal RNA processing protein 1 homolog OS=Drosophila melanogaster GN=Nnp-1 PE=1 SV=1	4		NR_003793	snoRNA:Psi28S-1153	5.71405
Q27272	Transcription initiation factor TFIID subunit 9 OS=Drosophila melanogaster GN=e(y)1 PE=1 SV=1	9		NM_137394	ND-51L1	4.80536
Q8T3U2	40S ribosomal protein S23 OS=Drosophila melanogaster GN=RpS23 PE=2 SV=1	10		NM_143655	yellow-h	7.71072
P08570	60S acidic ribosomal protein P1 OS=Drosophila melanogaster GN=RpLP1 PE=1 SV=2	20.3333		NM_079887	mav	9.67524
Q9VZS4	Ribosomal protein L28, isoform C OS=Drosophila melanogaster GN=RpL28 PE=2 SV=1	9.33333		NM_169939	Atpalpha	5.98664
Q9VXR3	CG8184 OS=Drosophila melanogaster GN=CG8184 PE=1 SV=2	35.6667		NM_142985	CG5715	4.09975
Q9VN50	Eukaryotic translation initiation factor 3 subunit F-1 OS=Drosophila melanogaster GN=eIF3-S5-1 PE=2 SV=1	12.3333		NM_001260354	Uck	3.96347
Q9VZM7	CG1120 OS=Drosophila melanogaster GN=CG1120 PE=1 SV=1	13.3333		NM_136294	CG3635	2.93771
P23696	Serine/threonine-protein phosphatase PP2A OS=Drosophila melanogaster GN=mts PE=2 SV=1	10.6667		NM_140743	CG7484	9.61222
Q94547	Regulator of gene activity OS=Drosophila melanogaster GN=Rga PE=2 SV=2	11		NM_001144621	InR	7.31402
Q94547-2	Isoform B of Regulator of gene activity OS=Drosophila melanogaster GN=Rga	10.3333		NM_169057	NKCC	4.30376
Q7KLX3	GM12291p OS=Drosophila melanogaster GN=Tapdelta PE=1 SV=1	7		NM_134843	CG3515	2.96092
Q9VVU5	COP9 signalosome complex subunit 1b OS=Drosophila melanogaster GN=CSN1b PE=2 SV=1	10		NM_140412	CG8833	7.7929
Q9VT60	Calcium-independent phospholipase A2 VIA, isoform A OS=Drosophila melanogaster GN=iPLA2-VIA PE=2 SV=3	7.33333		NM_058071	Polr2C	8.20525
Q7KUD4	Calcium-independent phospholipase A2 VIA, isoform B OS=Drosophila melanogaster GN=iPLA2-VIA PE=1 SV=1	7.33333		NM_001298398	CDC50	11.6318
E1JGX2	G protein-coupled receptor kinase 1, isoform B OS=Drosophila melanogaster GN=Gprk1 PE=3 SV=1	10.6667		NM_135945	CG5861	11.131
P32865	G protein-coupled receptor kinase 1 OS=Drosophila melanogaster GN=Gprk1 PE=1 SV=2	10.6667		NM_001038858	Ih	10.9637
Q7JZF5	RE34924p OS=Drosophila melanogaster GN=Rpb5 PE=2 SV=1	9.33333		NM_167157	Sptr	11.0381
Q9VS46	RINT1-like protein OS=Drosophila melanogaster GN=CG8605 PE=1 SV=2	12.3333		NM_135797	CG6523	11.0505
A8E6M1	CG30122, isoform D OS=Drosophila melanogaster GN=CG30122 PE=2 SV=1	8.33333		NM_138184	CG32344	8.41809
E1JGL8	CG30122, isoform C OS=Drosophila melanogaster GN=CG30122 PE=4 SV=1	8.33333		NM_079934	Sras	10.5489
A1ZBB4	CG30122, isoform B OS=Drosophila melanogaster GN=CG30122 PE=1 SV=1	8.33333		NM_140991	CG13252	6.7966
A8DYA3	Toutatis, isoform E OS=Drosophila melanogaster GN=tou PE=4 SV=1	12		NM_141157	l(3)04053	9.50979
Q8T0U6	Serine/threonine-protein phosphatase OS=Drosophila melanogaster GN=flw PE=1 SV=1	8.33333		NR_003881	snoRNA:Psi28S-3385a	3.6993
P48462	Serine/threonine-protein phosphatase beta isoform OS=Drosophila melanogaster GN=flw PE=1 SV=1	8		NM_139820	Cpr65Ec	5.42763
A1Z8M2	Toutatis, isoform A OS=Drosophila melanogaster GN=tou PE=1 SV=2	11.6667		NM_138118	CG3880	4.37929
Q8IPT2	Smc5, isoform E OS=Drosophila melanogaster GN=Smc5 PE=4 SV=3	9.66667		NR_167820	lncRNA:CR46410	2.15608
Q9VPB6	CG11396 OS=Drosophila melanogaster GN=CG11396 PE=2 SV=2	9.33333		NM_058131	CG6712	8.81318
Q9W397	CG7246 OS=Drosophila melanogaster GN=CG7246 PE=1 SV=1	10.6667		NM_079220	yip7	8.47744
Q9VIW7	tRNA-splicing ligase RtcB homolog OS=Drosophila melanogaster GN=CG9987 PE=1 SV=1	7.33333		NM_143371	snu	3.68274
P23573	Cell division control protein 2 cognate OS=Drosophila melanogaster GN=cdc2c PE=1 SV=1	8.33333		NM_001298521	Sec61gamma	7.36257
E1JIR3	Cdc2c, isoform C OS=Drosophila melanogaster GN=cdc2c PE=4 SV=1	8.33333		NM_079232	mei-P22	4.79136
O76863	EG:100G10.3 protein OS=Drosophila melanogaster GN=eIF2B-beta PE=1 SV=1	9		NM_167788	Cda4	5.24534
O77277	Torsin-like protein OS=Drosophila melanogaster GN=torp4a PE=2 SV=2	8.66667		NM_137156	Cyp6a23	11.2442
A8DY44	Nipped-A, isoform D OS=Drosophila melanogaster GN=Nipped-A PE=4 SV=1	11		NM_132225	CG18262	7.93273
A1ZBW3	Bancal, isoform B OS=Drosophila melanogaster GN=bl PE=4 SV=1	7.66667		NM_001258889	kis	3.77791
A1Z7J7	Sec31, isoform A OS=Drosophila melanogaster GN=sec31 PE=4 SV=1	5.66667		NM_001299141	Nedd8	6.54131
A1Z7J6	Sec31, isoform B OS=Drosophila melanogaster GN=sec31 PE=1 SV=1	5.66667		NR_124654	lncRNA:CR44642	6.26352
Q7KES3	Hephaestus OS=Drosophila melanogaster GN=heph PE=2 SV=1	7		NM_139813	CG17744	2.81195
P13469	DNA-binding protein modulo OS=Drosophila melanogaster GN=mod PE=1 SV=2	7		NM_143932	Sf3b5	11.9494
Q9W2K8	CG9418 OS=Drosophila melanogaster GN=BEST:LD07122 PE=1 SV=1	5		NM_142086	CG9649	6.28725
P25007	Peptidyl-prolyl cis-trans isomerase OS=Drosophila melanogaster GN=Cyp1 PE=1 SV=2	3.66667		NR_073900	asRNA:CR43787	3.18591
Q9V3U0	Long-chain-fatty-acid--CoA ligase bubblegum-like OS=Drosophila melanogaster GN=CG4500 PE=2 SV=1	4.66667		NM_164313	CG12581	4.30588
Q9VMX1	Protein KBP homolog OS=Drosophila melanogaster GN=CG14043 PE=1 SV=1	4		NM_001275150	Pfdn6	6.48525
Q7KND8	FI09619p OS=Drosophila melanogaster GN=Mad1 PE=1 SV=1	5.33333		NM_169665	AOX2	2.32807
E1JHF4	Abrupt, isoform D OS=Drosophila melanogaster GN=ab PE=4 SV=1	4.66667		NM_079058	slim	11.0602
Q24174-2	Isoform B of Protein abrupt OS=Drosophila melanogaster GN=ab	4.66667		NM_142261	CG10264	5.00345
Q9VGL0	CG14712 OS=Drosophila melanogaster GN=CG14712 PE=1 SV=3	4.33333		NM_079867	mRpL32	10.7923
Q9GU68	Eukaryotic translation initiation factor 5A OS=Drosophila melanogaster GN=eIF-5A PE=1 SV=2	3		NM_001298057	CARPA	10.8488
Q9W4N8	LD30122p OS=Drosophila melanogaster GN=Vap-33-1 PE=1 SV=1	10.6667		NM_206274	CG12605	2.4471
Q7KVX5	Vap-33-1, isoform A OS=Drosophila melanogaster GN=Vap-33-1 PE=2 SV=1	10.6667		NM_001260344	AP-1sigma	10.7133
Q9VCA8	Ankyrin repeat and KH domain-containing protein mask OS=Drosophila melanogaster GN=mask PE=1 SV=2	14.3333		NM_057401	aurA	5.91324
O61267	Ovarian-specific serine/threonine-protein kinase Lok OS=Drosophila melanogaster GN=lok PE=2 SV=1	11.3333		NM_057658	Cdc37	10.8849
P08111	Lethal(2) giant larvae protein OS=Drosophila melanogaster GN=l(2)gl PE=1 SV=2	12		NM_079379	SsRbeta	11.7769
P08111-3	Isoform B of Lethal(2) giant larvae protein OS=Drosophila melanogaster GN=l(2)gl	11.6667		NM_001274862	CG43894	2.3205
P08111-4	Isoform D of Lethal(2) giant larvae protein OS=Drosophila melanogaster GN=l(2)gl	11		NM_001103992	klar	4.90452
Q7JV23	CG11198, isoform B OS=Drosophila melanogaster GN=ACC PE=1 SV=1	30		NM_080018	Tollo	6.3765
Q8IRJ8-1	Isoform B of THO complex protein 7 OS=Drosophila melanogaster GN=thoc7	6.33333		NM_001170219	Octbeta1R	6.12501
Q8IRJ8	THO complex protein 7 OS=Drosophila melanogaster GN=thoc7 PE=1 SV=2	6.33333		NM_057553	brn	7.63281
D2A6L8	CG41503 (Fragment) OS=Drosophila melanogaster GN=CG41503 PE=4 SV=2	6		NM_135373	Wdr82	10.752
Q9VD58	CG6439, isoform A OS=Drosophila melanogaster GN=CG6439 PE=1 SV=1	8.66667		NM_135744	CG6180	11.068
Q8SZY9	CG32075 OS=Drosophila melanogaster GN=CG6316 PE=2 SV=1	6.66667		NM_138102	CG42360	8.95857
Q24050	Anon-i1 protein OS=Drosophila melanogaster GN=anon-i1 PE=1 SV=1	8		NM_057880	Gs1l	8.99879
Q9VWP5	CG34422, isoform A OS=Drosophila melanogaster GN=CG34422 PE=1 SV=3	11.6667		NM_136631	CG2063	10.6121
Q9VPL6	Kismet, isoform B OS=Drosophila melanogaster GN=kis PE=2 SV=1	11.3333		NM_143063	EMC6	12.4691
Q7PLI2	Nipped-B protein OS=Drosophila melanogaster GN=Nipped-B PE=1 SV=3	12.6667		NM_001110544	Maf1	8.44565
P05552	Transcription factor Adf-1 OS=Drosophila melanogaster GN=Adf1 PE=1 SV=2	9		NM_134730	Tfb4	7.84485
E1JGX3	Nipped-B, isoform G OS=Drosophila melanogaster GN=Nipped-B PE=4 SV=1	12.3333		NM_079300	Sgs3	7.34515
P05552-2	Isoform A of Transcription factor Adf-1 OS=Drosophila melanogaster GN=Adf1	9		NM_168657	CG13049	7.66488
Q9VSL4	CG6673, isoform B OS=Drosophila melanogaster GN=CG6673 PE=1 SV=2	6.66667		NM_135235	l(2)k09022	6.34537
Q9VKB9-2	Isoform B of Rab3 GTPase-activating protein regulatory subunit OS=Drosophila melanogaster GN=rab3-GAP	22		NM_001169671	mars	3.96998
Q7PLI7	Serine/threonine-protein kinase CG17528 OS=Drosophila melanogaster GN=CG17528 PE=1 SV=1	6.33333		NM_001298175	CG1552	6.78427
Q9V3L6	Nuclear cap-binding protein subunit 2 OS=Drosophila melanogaster GN=Cbp20 PE=1 SV=1	9.33333		NM_001042964	CG17683	8.86056
Q9VLL3	A kinase anchor protein 200, isoform A OS=Drosophila melanogaster GN=Akap200 PE=2 SV=3	5.66667		NM_137407	Dlish	6.96514
Q8IPF5	A kinase anchor protein 200, isoform B OS=Drosophila melanogaster GN=Akap200 PE=2 SV=1	5.66667		NM_168987	Vps11	9.95909
Q9VXG1	Zinc finger protein hangover OS=Drosophila melanogaster GN=hang PE=1 SV=3	14		NM_169480	CG31345	12.2185
Q9VLX2	CG7154 OS=Drosophila melanogaster GN=CG7154 PE=1 SV=1	14		NM_142477	CG14301	7.99099
Q9VYY3	Ubiquitin-like modifier-activating enzyme 5 OS=Drosophila melanogaster GN=CG1749 PE=1 SV=1	8		NM_001170207	CG34034	4.58746
Q9VSA3	Probable medium-chain specific acyl-CoA dehydrogenase, mitochondrial OS=Drosophila melanogaster GN=CG12262 PE=1 SV=1	13.6667		NM_168275	CG32354	8.96605
Q7JVL3	GM13395p OS=Drosophila melanogaster GN=Prp38 PE=1 SV=1	6.33333		NM_132307	CG12056	9.42738
Q8SWW4	CG16972 OS=Drosophila melanogaster GN=CG16972 PE=1 SV=1	5.33333		NM_137057	Cpr50Cb	9.21312
Q86B87-15	Isoform G of Modifier of mdg4 OS=Drosophila melanogaster GN=mod(mdg4)	11		NM_137848	CG3732	10.8578
Q86B87-24	Isoform D of Modifier of mdg4 OS=Drosophila melanogaster GN=mod(mdg4)	11.3333		NM_136251	CG9246	9.3352
Q86B87-30	Isoform AC of Modifier of mdg4 OS=Drosophila melanogaster GN=mod(mdg4)	11.3333		NM_166292	CG30116	5.13589
Q86B87-8	Isoform F of Modifier of mdg4 OS=Drosophila melanogaster GN=mod(mdg4)	11		NM_078904	Cyp6a2	6.01016
Q86B87-11	Isoform K of Modifier of mdg4 OS=Drosophila melanogaster GN=mod(mdg4)	10.6667		NM_166060	Blos1	12.0377
Q86B87-23	Isoform 54.7 of Modifier of mdg4 OS=Drosophila melanogaster GN=mod(mdg4)	10.6667		NM_137669	CG13443	2.68337
Q86B87-20	Isoform R of Modifier of mdg4 OS=Drosophila melanogaster GN=mod(mdg4)	10.6667		NM_001382076		7.56835
Q86B87-21	Isoform Q of Modifier of mdg4 OS=Drosophila melanogaster GN=mod(mdg4)	10.6667		NM_139536	Larp4B	9.89092
Q86B87-17	Isoform A of Modifier of mdg4 OS=Drosophila melanogaster GN=mod(mdg4)	10.6667		NM_140159	galla-2	10.7845
Q86B87-16	Isoform 53.1 of Modifier of mdg4 OS=Drosophila melanogaster GN=mod(mdg4)	10.6667		NM_079394	Galphaf	3.97765
Q86B87-19	Isoform J of Modifier of mdg4 OS=Drosophila melanogaster GN=mod(mdg4)	10.6667		NM_141792	ZnT86D	9.5896
Q86B87-31	Isoform AB of Modifier of mdg4 OS=Drosophila melanogaster GN=mod(mdg4)	10.6667		NR_074057	lncRNA:CR44092	5.1064
Q86B87-29	Isoform AA of Modifier of mdg4 OS=Drosophila melanogaster GN=mod(mdg4)	10.6667		NM_170197	veli	6.28962
Q86B87-28	Isoform 53.6 of Modifier of mdg4 OS=Drosophila melanogaster GN=mod(mdg4)	10.6667		NM_136266	CG17570	2.45769
Q86B87-27	Isoform B of Modifier of mdg4 OS=Drosophila melanogaster GN=mod(mdg4)	10.6667		NM_001014573	Hn	2.8775
Q86B87-5	Isoform O of Modifier of mdg4 OS=Drosophila melanogaster GN=mod(mdg4)	10.6667		NM_001144588	CG42232	8.42675
Q86B87-2	Isoform E of Modifier of mdg4 OS=Drosophila melanogaster GN=mod(mdg4)	10.6667		NM_134989	morgue	10.3173
Q86B87-14	Isoform M of Modifier of mdg4 OS=Drosophila melanogaster GN=mod(mdg4)	11		NM_140510	CG7275	9.33244
Q86B87-10	Isoform H of Modifier of mdg4 OS=Drosophila melanogaster GN=mod(mdg4)	10.6667		NM_170646	pyd	7.36685
E1JIH4	CG8478, isoform D OS=Drosophila melanogaster GN=CG8478 PE=4 SV=1	8		NM_079607	Arp1	12.5442
Q9VH75	CG8478, isoform C OS=Drosophila melanogaster GN=CG8478 PE=4 SV=4	8		NR_048082	snoRNA:lola-a	3.40847
Q961C3	CG8478, isoform B OS=Drosophila melanogaster GN=CG8478 PE=1 SV=1	8		NM_165856	ADD1	8.81522
Q86B87-18	Isoform L of Modifier of mdg4 OS=Drosophila melanogaster GN=mod(mdg4)	10.6667		NR_002492	lncRNA:CR33938	3.35913
Q95RC0-3	Isoform C of N-alpha-acetyltransferase 30, NatC catalytic subunit OS=Drosophila melanogaster GN=CG11412	5.66667		NR_073844	asRNA:CR44165	7.28147
Q95RC0-2	Isoform B of N-alpha-acetyltransferase 30, NatC catalytic subunit OS=Drosophila melanogaster GN=CG11412	5.66667		NM_141394	CG42564	4.98829
Q95RC0	N-alpha-acetyltransferase 30, NatC catalytic subunit OS=Drosophila melanogaster GN=CG11412 PE=1 SV=1	5.66667		NM_079993	sut2	4.0392
B7Z0G1	Haywire, isoform B OS=Drosophila melanogaster GN=hay PE=4 SV=1	5.66667		NM_079061	mRpS28	10.5914
Q02870	DNA excision repair protein haywire OS=Drosophila melanogaster GN=hay PE=2 SV=2	5.66667		NM_168244	CG32368	6.79895
Q9V597	60S ribosomal protein L31 OS=Drosophila melanogaster GN=RpL31 PE=1 SV=1	8.66667		NM_169052	kkv	2.14119
Q7JNE1	Non-histone chromosomal protein Prod OS=Drosophila melanogaster GN=prod PE=1 SV=1	13		NM_142639	Srp14	9.71961
O44081	H/ACA ribonucleoprotein complex subunit 4 OS=Drosophila melanogaster GN=Nop60B PE=1 SV=1	6.33333		NM_130534	CG14626	2.56475
E1JGV6	Nucleolar protein at 60B, isoform C OS=Drosophila melanogaster GN=Nop60B PE=4 SV=1	6.33333		NM_165845	Tret1-1	2.59214
P84040	Histone H4 OS=Drosophila melanogaster GN=His4 PE=1 SV=2	10.6667		NM_137428	olf186-M	8.38528
Q9VXC1	CG34325 OS=Drosophila melanogaster GN=CG18358 PE=4 SV=3	3		NR_163210	sisRNA:3	5.15134
Q9W1B9	RE28824p OS=Drosophila melanogaster GN=RpL12 PE=1 SV=1	7.66667		NM_001300710	UQCR-11	8.22807
Q9VLT5	Protein purity of essence OS=Drosophila melanogaster GN=poe PE=1 SV=1	28		NM_001300425	Akt	8.18387
Q9VF02	Helicase 89B OS=Drosophila melanogaster GN=Hel89B PE=4 SV=3	17.3333		NM_001298278	Rbp1-like	10.7368
Q9VRV8	Transportin, isoform A OS=Drosophila melanogaster GN=Trn PE=1 SV=1	10.6667		NM_141661	CG8312	7.41223
Q7KTX8	Mediator of RNA polymerase II transcription subunit 13 OS=Drosophila melanogaster GN=skd PE=1 SV=1	14		NM_170058	cnc	3.41504
A8JNW4	Skuld, isoform E OS=Drosophila melanogaster GN=skd PE=4 SV=1	14		NM_141714	mtTFB2	9.26499
Q7KWG3	Sperm-specific dynein intermediate chain 2 OS=Drosophila melanogaster GN=Sdic2 PE=2 SV=1	9		NM_170162	CG31126	10.2322
P49846	Transcription initiation factor TFIID subunit 5 OS=Drosophila melanogaster GN=Taf5 PE=1 SV=1	14		NM_058017	b6	6.94213
Q8IMW1	Absent, small, or homeotic discs 2, isoform B OS=Drosophila melanogaster GN=ash2 PE=2 SV=1	7.66667		NM_080485	128up	10.4448
O46050	EG:152A3.1 protein OS=Drosophila melanogaster GN=Nmd3 PE=1 SV=1	9.33333		NR_124606	lncRNA:CR44417	9.3509
P20353	Guanine nucleotide-binding protein G(i) subunit alpha 65A OS=Drosophila melanogaster GN=G-ialpha65A PE=1 SV=2	10.6667		NM_001169749	CG15649	2.28861
Q9W4J5	Ribosomal RNA small subunit methyltransferase NEP1 OS=Drosophila melanogaster GN=CG3527 PE=3 SV=2	7		NR_124962	lncRNA:CR45179	2.68524
Q7KTV9	Smc5, isoform F OS=Drosophila melanogaster GN=Smc5 PE=4 SV=2	8.66667		NM_141583	IscU	14.3941
Q9VW47	Mediator of RNA polymerase II transcription subunit 12 OS=Drosophila melanogaster GN=kto PE=1 SV=2	8.66667		NM_176539	CG33110	6.51876
P18431-3	Isoform SGG39 of Protein kinase shaggy OS=Drosophila melanogaster GN=sgg	8.33333		NM_142941	AP-1sigma	12.0149
P18431-2	Isoform Zygotic of Protein kinase shaggy OS=Drosophila melanogaster GN=sgg	8.33333		NM_143532	CG15536	9.59118
A4V3W1	Shaggy, isoform J OS=Drosophila melanogaster GN=sgg PE=4 SV=1	8.33333		NM_001274301	Glut1	2.57861
A4V3W2	Shaggy, isoform C OS=Drosophila melanogaster GN=sgg PE=4 SV=1	8.33333		NR_003886	snoRNA:Psi28S-2442a	3.77554
Q07DP5	TATA box binding protein-related factor 2, isoform E OS=Drosophila melanogaster GN=Trf2 PE=2 SV=1	8		NM_078667	Taf9	7.46899
Q86BY9	Protein rigor mortis OS=Drosophila melanogaster GN=rig PE=1 SV=1	7.66667		NM_057981	ebi	10.6603
Q9VQI5	CG31694 OS=Drosophila melanogaster GN=CG3098 PE=1 SV=2	9.66667		NM_001298639	Syt1	13.2894
P07909	Heterogeneous nuclear ribonucleoprotein A1 OS=Drosophila melanogaster GN=Hrb98DE PE=2 SV=1	7.33333		NM_145874	CG30154	9.00839
P07909-3	Isoform E of Heterogeneous nuclear ribonucleoprotein A1 OS=Drosophila melanogaster GN=Hrb98DE	7.33333		NM_143070	CG11791	8.06999
P07909-2	Isoform A of Heterogeneous nuclear ribonucleoprotein A1 OS=Drosophila melanogaster GN=Hrb98DE	7.33333		NM_001259339	ths	11.5166
P07909-4	Isoform D of Heterogeneous nuclear ribonucleoprotein A1 OS=Drosophila melanogaster GN=Hrb98DE	7.33333		NM_136831	CG13202	2.15067
A4V3J6	Heterogeneous nuclear ribonucleoprotein at 98DE, isoform F OS=Drosophila melanogaster GN=Hrb98DE PE=4 SV=1	7.33333		NM_001276153	yata	9.16287
A4V3J5	Heterogeneous nuclear ribonucleoprotein at 98DE, isoform C OS=Drosophila melanogaster GN=Hrb98DE PE=4 SV=1	7.33333		NM_001297869	east	4.41818
Q9VAQ5	Probable dimethyladenosine transferase OS=Drosophila melanogaster GN=CG11837 PE=2 SV=1	6		NM_132356	CG15247	3.67044
Q24134	Negative elongation factor D OS=Drosophila melanogaster GN=TH1 PE=1 SV=2	6.66667		NM_140495	CG12316	5.13721
Q9XZ09	CG11006, isoform A OS=Drosophila melanogaster GN=Sap130 PE=2 SV=1	8.66667		NM_001272288	DIP-alpha	5.64864
P48602	V-type proton ATPase catalytic subunit A isoform 1 OS=Drosophila melanogaster GN=Vha68-1 PE=2 SV=2	5.66667		NM_001015387	Tim23	13.4481
P13709	Homeotic protein female sterile OS=Drosophila melanogaster GN=fs(1)h PE=1 SV=2	7		NM_078989	Lac	11.0156
Q8IQI0	CG11006, isoform C OS=Drosophila melanogaster GN=Sap130 PE=2 SV=1	8.33333		NM_079178	sty	8.54054
Q8IQH9	CG11006, isoform B OS=Drosophila melanogaster GN=Sap130 PE=2 SV=1	8.33333		NR_133451	lncRNA:CR45910	6.30159
Q9V3P0	Peroxiredoxin 1 OS=Drosophila melanogaster GN=Jafrac1 PE=1 SV=1	6		NM_001103723	CG34200	11.7
Q9VYW4	CG1703 OS=Drosophila melanogaster GN=CG1703 PE=1 SV=1	6.33333		NM_057621	Vha14-1	15.1073
Q9VHT2	FI07663p OS=Drosophila melanogaster GN=tex PE=2 SV=1	6.33333		NM_079124	Ssl	2.49836
Q9VSW2	RE14081p OS=Drosophila melanogaster GN=UGP PE=1 SV=2	7		NM_079727	CSN6	11.335
Q9VSW1	LD13601p OS=Drosophila melanogaster GN=UGP PE=2 SV=2	7		NR_048099	asRNA:CR43468	2.60201
E1JI91	UGP, isoform E OS=Drosophila melanogaster GN=UGP PE=4 SV=1	7		NM_130609	CG3587	8.53333
A5XCL5	LD36265p (Fragment) OS=Drosophila melanogaster GN=UGP PE=2 SV=1	7		NM_136555	beta3GalTII	9.08856
P08182-3	Isoform B of Casein kinase II subunit beta OS=Drosophila melanogaster GN=CkIIbeta	5.66667		NM_001274059	igl	4.39733
P08182	Casein kinase II subunit beta OS=Drosophila melanogaster GN=CkIIbeta PE=1 SV=2	5.66667		NM_142430	CG14313	2.81482
A1Z840	Cdc2-related-kinase, isoform A OS=Drosophila melanogaster GN=cdc2rk PE=2 SV=1	6.33333		NM_057693	Pen	5.37399
A4V4C1	Casein kinase II beta subunit, isoform C OS=Drosophila melanogaster GN=CkIIbeta PE=2 SV=1	5.66667		NM_001169555	sky	6.11359
Q7JWD3	ATPase ASNA1 homolog OS=Drosophila melanogaster GN=CG1598 PE=1 SV=1	4.33333		NM_165437	Ugt50B3	3.38014
Q9VCI4	CG10217, isoform A OS=Drosophila melanogaster GN=CG10217-RA PE=1 SV=2	4.66667		NM_001273907		7.96892
Q9VNZ3	GM03174p OS=Drosophila melanogaster GN=Rpb8 PE=2 SV=1	5		NM_138201	CG3402	12.0597
P08645	Ras-like protein 3 OS=Drosophila melanogaster GN=R PE=2 SV=2	4.33333		NM_141134	laza	8.21835
P61209	ADP-ribosylation factor 1 OS=Drosophila melanogaster GN=Arf79F PE=1 SV=2	2.66667		NM_079658	mRpS11	11.5268
Q7JZ53	CG4866, isoform A OS=Drosophila melanogaster GN=mRpS4 PE=1 SV=1	5		NM_138236	Trh	11.5404
Q9VSW5	Kinesin-like protein at 67A OS=Drosophila melanogaster GN=Klp67A PE=2 SV=1	5		NM_079656	mRpS33	11.6258
P25160	ADP-ribosylation factor-like protein 1 OS=Drosophila melanogaster GN=Arf72A PE=1 SV=5	3.66667		NM_134524	CG9570	2.65635
Q9VK59	CG5787 OS=Drosophila melanogaster GN=CG5787 PE=1 SV=2	3.33333		NM_137887	EMC8-9	11.391
Q9V3H9	BcDNA.LD27873 OS=Drosophila melanogaster GN=BcDNA.LD27873 PE=1 SV=1	3.33333		NM_143535	CG15534	2.86136
E1JIH5	Mediator of RNA polymerase II transcription subunit 6 OS=Drosophila melanogaster GN=MED6 PE=3 SV=1	2.66667		NM_001259375	stj	6.16355
Q8MSX2	Mediator of RNA polymerase II transcription subunit 6 OS=Drosophila melanogaster GN=MED6 PE=1 SV=1	2.66667		NM_142193	Trs33	9.75412
Q7JVI6	CG11784 OS=Drosophila melanogaster GN=CG11784 PE=2 SV=1	3.33333		NM_057823	Rab14	11.5487
Q9VVG4	Exocyst complex component 1 OS=Drosophila melanogaster GN=sec3 PE=1 SV=2	15		NM_001276235	l(3)80Fg	7.56281
Q94899	COP9 signalosome complex subunit 2 OS=Drosophila melanogaster GN=alien PE=1 SV=2	12.6667		NM_001298805	Sirup	4.83373
Q9VCC9	LD23779p OS=Drosophila melanogaster GN=Tsc1 PE=2 SV=1	8.66667		NM_142050	ninaB	8.47785
Q9VR59-3	Isoform G of Inositol hexakisphosphate and diphosphoinositol-pentakisphosphate kinase OS=Drosophila melanogaster GN=l(1)G0196	9.66667		NR_133416	lncRNA:CR45996	2.29978
Q9VR59-5	Isoform J of Inositol hexakisphosphate and diphosphoinositol-pentakisphosphate kinase OS=Drosophila melanogaster GN=l(1)G0196	9.66667		NM_136114	CG17350	5.60606
Q9VR59-7	Isoform K of Inositol hexakisphosphate and diphosphoinositol-pentakisphosphate kinase OS=Drosophila melanogaster GN=l(1)G0196	9.66667		NM_137540	CG18190	3.20824
Q24314	Vacuolar protein sorting-associated protein 18 homolog OS=Drosophila melanogaster GN=dor PE=1 SV=3	9.66667		NM_001273071	Shaw	7.50904
Q9W420	Transcription elongation factor SPT6 OS=Drosophila melanogaster GN=Spt6 PE=1 SV=1	46.6667		NM_001273171	Hel25E	6.95822
Q9VR59	Inositol hexakisphosphate and diphosphoinositol-pentakisphosphate kinase OS=Drosophila melanogaster GN=l(1)G0196 PE=1 SV=2	9.33333		NM_135561	Nse4	7.80307
Q9VR59-6	Isoform H of Inositol hexakisphosphate and diphosphoinositol-pentakisphosphate kinase OS=Drosophila melanogaster GN=l(1)G0196	9.66667		NM_132683	CG12177	7.55803
Q9VFC0	MAU2 chromatid cohesion factor homolog OS=Drosophila melanogaster GN=CG4203 PE=2 SV=1	7.66667		NM_001275657	Hsc70-4	3.56964
Q24087	DNA repair endonuclease XPF OS=Drosophila melanogaster GN=mei-9 PE=1 SV=2	13		NR_124694	lncRNA:CR45327	4.86698
P00334	Alcohol dehydrogenase OS=Drosophila melanogaster GN=Adh PE=1 SV=2	6.33333		NM_134967	Cep97	9.86269
Q9VC94	CG5728 OS=Drosophila melanogaster GN=CG5728 PE=1 SV=2	9.66667		NM_143631	CG1910	7.21319
Q7JWD6	Elongin C, isoform A OS=Drosophila melanogaster GN=Elongin-C PE=1 SV=1	6		NM_132844	CG8952	2.34712
Q9VWG1	CG14207, isoform A OS=Drosophila melanogaster GN=HspB8 PE=1 SV=1	4		NM_134765	CG14352	7.57439
Q0E9Q5	Adherens junction protein p120, isoform B OS=Drosophila melanogaster GN=p120ctn PE=4 SV=1	5.33333		NM_057313	okr	5.34667
Q7PLI0	Adherens junction protein p120, isoform A OS=Drosophila melanogaster GN=p120ctn PE=1 SV=1	5.33333		NM_001274609	CG44195	4.64506
A1Z6I7	Bub1-related kinase OS=Drosophila melanogaster GN=BubR1 PE=1 SV=1	5.66667		NM_001043269	CG17271	6.58556
Q7K4L8	CG7878 OS=Drosophila melanogaster GN=CG7878 PE=1 SV=1	10.6667		NM_057785	Pi3K59F	10.1636
Q9V3G6	CCR4-NOT transcription complex subunit 10 homolog OS=Drosophila melanogaster GN=CG18616 PE=1 SV=1	6		NM_143778	ATPsynG	2.3725
Q2PE30	Mitotic 15, isoform C OS=Drosophila melanogaster GN=mit(1)15 PE=2 SV=1	13.6667		NM_166780	gw	7.98529
Q9VXG1-2	Isoform A of Zinc finger protein hangover OS=Drosophila melanogaster GN=hang	13.6667		NR_123888	lncRNA:CR45625	5.57622
B7Z0Z1	Hangover, isoform C OS=Drosophila melanogaster GN=hang PE=4 SV=1	14.3333		NM_136486	CG12159	9.90931
Q24318-2	Isoform B of Transcription factor Dp OS=Drosophila melanogaster GN=Dp	7.66667		NM_001299364	CG7220	2.48581
Q24318	Transcription factor Dp OS=Drosophila melanogaster GN=Dp PE=1 SV=2	7.66667		NM_137997	CG5597	6.08421
Q9VVI2	Enhancer of mRNA-decapping protein 3 OS=Drosophila melanogaster GN=Edc3 PE=1 SV=1	10		NM_001169823	ITP	4.81676
Q8T6B9-2	Isoform B of Poly(U)-binding-splicing factor half pint OS=Drosophila melanogaster GN=pUf68	4.66667		NM_140289	ssp	9.15413
Q94920	Voltage-dependent anion-selective channel OS=Drosophila melanogaster GN=porin PE=1 SV=3	4.33333		NM_164346	Sfxn1-3	4.38923
A4V193	Poly U binding factor 68kD, isoform D OS=Drosophila melanogaster GN=pUf68 PE=4 SV=1	4.66667		NM_057228	hth	7.71713
Q9V9K7	Serrate RNA effector molecule homolog OS=Drosophila melanogaster GN=Ars2 PE=1 SV=2	8		NM_142911	SPE	6.38249
Q9VDE3	LD08669p OS=Drosophila melanogaster GN=slmb PE=1 SV=1	4		NM_001169474	dpr2	10.0214
Q24168	Origin recognition complex subunit 2 OS=Drosophila melanogaster GN=Orc2 PE=1 SV=2	10.6667		NM_165371	Gr39a	5.14539
P15357	Ubiquitin-40S ribosomal protein S27a OS=Drosophila melanogaster GN=RpS27A PE=1 SV=2	11.3333		NM_001274141	CG10916	7.34316
E1JH57	Mars, isoform B OS=Drosophila melanogaster GN=mars PE=4 SV=1	4.33333		NM_135242	Gas41	10.5367
Q7K3L1	Guanylate kinase-associated protein mars OS=Drosophila melanogaster GN=mars PE=1 SV=1	4.33333		NM_001273726	CG9265	6.44192
Q7KVQ0	Probable H/ACA ribonucleoprotein complex subunit 1 OS=Drosophila melanogaster GN=CG4038 PE=1 SV=1	4.33333		NM_001014590	Eip74EF	9.33622
Q9VAM5	Brd8 OS=Drosophila melanogaster GN=Brd8 PE=1 SV=1	7		NM_001259740	Unr	6.88805
Q9U3Z7	NHP2-like protein 1 homolog OS=Drosophila melanogaster GN=hoip PE=1 SV=1	7.33333		NM_139978	se	14.022
Q9VT61	CG8108, isoform A OS=Drosophila melanogaster GN=CG8108 PE=1 SV=1	6.33333		NM_079397	a10	2.42735
Q7JZW2	RE08270p OS=Drosophila melanogaster GN=RpS15 PE=2 SV=1	8		NM_141647	CG9386	9.79899
A1ZAH8	Ribosomal protein S15, isoform B OS=Drosophila melanogaster GN=RpS15 PE=2 SV=1	8		NM_142447	CG14312	11.0823
Q9VMU4	60S ribosomal protein L37a OS=Drosophila melanogaster GN=RpL37A PE=1 SV=3	8.33333		NM_001260282	CG42322	7.35994
Q9V3Y5	BcDNA.LD23634 OS=Drosophila melanogaster GN=BcDNA.LD23634 PE=1 SV=1	5		NM_001043291	CG34150	9.4033
Q9VHI1	Hyrax OS=Drosophila melanogaster GN=hyx PE=2 SV=1	7		NM_079914	skd	5.48002
Q9VBH8	FI02850p OS=Drosophila melanogaster GN=RpL34a PE=1 SV=2	4.66667		NM_001169707	Sema1b	3.78004
Q9VHE5	RH48056p OS=Drosophila melanogaster GN=RpL34b PE=1 SV=1	4		NM_001273597	CLIP-190	6.53634
Q9XYN7	Proteasome subunit beta type-3 OS=Drosophila melanogaster GN=Prosbeta3 PE=1 SV=1	7.33333		NM_001299612	CG14483	6.46344
Q95TS5	CG5222 OS=Drosophila melanogaster GN=CG5222 PE=1 SV=1	17.3333		NM_078739	Prx6005	7.636
Q9VCK0	Eukaryotic translation initiation factor 3 subunit D-1 OS=Drosophila melanogaster GN=eIF-3p66 PE=1 SV=1	14		NM_135085	CG7382	12.0108
Q8MSU4	LD45768p OS=Drosophila melanogaster GN=Sym PE=1 SV=1	14		NM_138194	Hipk	11.92
Q4V5H1	Peptidyl-prolyl cis-trans isomerase OS=Drosophila melanogaster GN=CG17266 PE=1 SV=1	10.6667		NM_143600	CG1750	9.72154
Q9W5N2	60S ribosomal protein L38 OS=Drosophila melanogaster GN=RpL38 PE=2 SV=1	8.33333		NM_137185	CG8155	10.5301
Q9VBU8	CG11875 OS=Drosophila melanogaster GN=CG11875 PE=2 SV=1	12.3333		NM_137178	mRpL41	10.4318
Q9VHS0	CG9601 OS=Drosophila melanogaster GN=CG9601-RA PE=2 SV=2	14		NM_057354	rk	8.38682
Q9W5W4	Sperm-specific dynein intermediate chain 1 OS=Drosophila melanogaster GN=Sdic PE=1 SV=2	7.66667		NM_057500	CycC	9.83753
Q9W3N6	SD01505p OS=Drosophila melanogaster GN=p115 PE=1 SV=2	11.6667		NM_139574	CG32262	10.0101
O17468	Protein HIRA homolog OS=Drosophila melanogaster GN=Hira PE=1 SV=2	10.6667		NM_001273403	ClpP	8.83495
Q9VNP8	GH08526p OS=Drosophila melanogaster GN=Ssl1 PE=1 SV=2	7.66667		NM_143416	Alg13	9.67673
O76857	BCL7-like OS=Drosophila melanogaster GN=BCL7-like PE=1 SV=1	9.33333		NM_134678	CG11885	9.24641
P40417-3	Isoform C of Mitogen-activated protein kinase ERK-A OS=Drosophila melanogaster GN=rl	8		NM_001299507	Cyp317a1	3.82564
P40417-2	Isoform B of Mitogen-activated protein kinase ERK-A OS=Drosophila melanogaster GN=rl	8		NM_141810	mgr	11.3132
P40417	Mitogen-activated protein kinase ERK-A OS=Drosophila melanogaster GN=rl PE=1 SV=2	8		NM_165083	CG31769	5.5592
Q24324	Dual specificity mitogen-activated protein kinase kinase dSOR1 OS=Drosophila melanogaster GN=Dsor1 PE=2 SV=2	9.33333		NM_140170	Blos2	10.2749
A1Z9N0	Optic atrophy 1-like, isoform A OS=Drosophila melanogaster GN=opa1-like PE=3 SV=1	8.66667		NM_001042798	sdt	3.12865
Q95U20	GH13793p OS=Drosophila melanogaster GN=opa1-like PE=2 SV=1	8.66667		NM_135061	Rpn11	12.1919
Q8STG9	DSec61alpha OS=Drosophila melanogaster GN=Sec61alpha PE=2 SV=1	8		NM_001144274	sona	5.36364
O96860	Dynein light chain 2, cytoplasmic OS=Drosophila melanogaster GN=Cdlc2 PE=1 SV=1	6		NM_001043252	CG10405	2.43996
A8JUV9	Shaggy, isoform M OS=Drosophila melanogaster GN=sgg PE=4 SV=1	6.66667		NM_134901	cnir	10.6619
Q0KHW6	Shaggy, isoform L OS=Drosophila melanogaster GN=sgg PE=4 SV=1	6.66667		NM_137901	CG9896	9.66185
P18431-4	Isoform G of Protein kinase shaggy OS=Drosophila melanogaster GN=sgg	6.66667		NM_132009	OtopLa	9.59285
P18431	Protein kinase shaggy OS=Drosophila melanogaster GN=sgg PE=1 SV=2	6.66667		NM_132358	CG9686	12.6494
O01382	Caspase OS=Drosophila melanogaster GN=Ice PE=1 SV=2	6		NM_135520	Mob3	10.5108
Q2PDX2	CG34001 OS=Drosophila melanogaster GN=CG34001 PE=4 SV=2	6.33333		NM_001274874	CG10089	9.91465
Q9W2F2	DDB1- and CUL4-associated factor-like 1 OS=Drosophila melanogaster GN=CG10080 PE=1 SV=2	9.33333		NM_057552	wdn	8.43226
Q8I8U7	Transcription-associated protein 1 OS=Drosophila melanogaster GN=Nipped-A PE=1 SV=3	10.3333		NM_142869	Rassf	9.35078
A8JRC2	CG5028, isoform E OS=Drosophila melanogaster GN=CG5028 PE=4 SV=1	5		NM_001104030	VhaM9.7-a	11.7792
A1Z814	Oxysterol-binding protein OS=Drosophila melanogaster GN=CG1513 PE=1 SV=2	8		NM_134479	CG14205	3.32083
Q9Y113	Negative elongation factor B OS=Drosophila melanogaster GN=NELF-B PE=1 SV=1	4.33333		NM_136417	Spn43Ad	6.01463
E1JJJ8	Female sterile (1) homeotic, isoform F OS=Drosophila melanogaster GN=fs(1)h PE=4 SV=1	5.66667		NM_001299291	Tom7	3.26954
P13709-2	Isoform A of Homeotic protein female sterile OS=Drosophila melanogaster GN=fs(1)h	5.66667		NM_136766	CG7637	9.73551
O96689	FI11703p OS=Drosophila melanogaster GN=vtd PE=1 SV=1	7.33333		NM_168492	CG32099	9.59289
Q9VM75	HEAT repeat-containing protein 1 homolog OS=Drosophila melanogaster GN=l(2)k09022 PE=2 SV=2	8		NM_141652	Vps45	10.6784
Q9XZT7	Transcription initiation factor TFIID subunit 10b OS=Drosophila melanogaster GN=Taf10b PE=1 SV=1	4.66667		NM_137621	CG10444	10.0118
Q8MKK1	CG30185 OS=Drosophila melanogaster GN=CG30185;Gr59f PE=2 SV=1	6.33333		NM_001260149	Octbeta2R	7.07371
Q7JRH5	CG5726 OS=Drosophila melanogaster GN=CG5726 PE=1 SV=1	5		NM_142135	CG14857	5.07221
Q9VKJ1	MPN domain-containing protein CG4751 OS=Drosophila melanogaster GN=CG4751 PE=1 SV=1	6		NM_080032	Cyp4e1	6.5294
P48609	Cyclin-dependent kinase 5 homolog OS=Drosophila melanogaster GN=Cdk5 PE=1 SV=2	8		NM_132206	Upf2	8.96552
Q9VSN9	GM04779p OS=Drosophila melanogaster GN=SrpRbeta PE=2 SV=2	6.33333		NM_001298104	CG44325	3.09393
Q9VRJ6	CG10673 OS=Drosophila melanogaster GN=CG10673 PE=1 SV=1	6.33333		NM_135403	Trs23	10.7864
Q9VXU6	CG9203 OS=Drosophila melanogaster GN=CG9203 PE=1 SV=1	6.33333		NM_079012	RN-tre	8.66184
Q7K221	Glutamate oxaloacetate transaminase 1, isoform A OS=Drosophila melanogaster GN=Got1 PE=2 SV=1	7		NM_001276039	RpL27	4.65135
A1ZAA5	Glutamate oxaloacetate transaminase 1, isoform B OS=Drosophila melanogaster GN=Got1 PE=4 SV=1	7		NM_139518	ND-30	13.1061
Q9VTC4	MIP18 family protein CG7949 OS=Drosophila melanogaster GN=CG7949 PE=1 SV=1	2.33333		NM_001273581	VhaSFD	7.18105
Q9VIP4	LP17758p OS=Drosophila melanogaster GN=neb PE=2 SV=1	6.66667		NM_001275904	CAH8	8.53674
Q9VG73	Interleukin enhancer-binding factor 2 homolog OS=Drosophila melanogaster GN=CG5641 PE=1 SV=1	4.33333		NM_135087	Vps52	10.9778
P20432	Glutathione S-transferase 1-1 OS=Drosophila melanogaster GN=GstD1 PE=1 SV=1	4.33333		NM_001169462	Pten	6.58832
Q8I0A0	CG5854, isoform B OS=Drosophila melanogaster GN=CG5854 PE=2 SV=1	6.33333		NM_058056	wrapper	7.95614
Q9VTZ5	LD22449p OS=Drosophila melanogaster GN=Tsf2 PE=1 SV=1	6		NM_138019	PPP1R15	13.0165
Q9VHH9	JmjC domain-containing histone demethylation protein 1 OS=Drosophila melanogaster GN=Jhd1 PE=1 SV=2	7.33333		NM_001170129	Ace	3.25164
Q8SYL0	CG7718 OS=Drosophila melanogaster GN=CG7718 PE=2 SV=1	4		NM_169581	HEATR2	6.05044
Q9VJ58	Fas-associated factor OS=Drosophila melanogaster GN=Faf PE=2 SV=1	6		NM_132075	CG3781	9.40538
Q9VC49	DNA-directed RNA polymerases I, II, and III subunit RPABC5 OS=Drosophila melanogaster GN=Rpb10 PE=1 SV=1	5.66667		NM_079070	EloC	5.40061
Q8IQ97	Pebble, isoform B OS=Drosophila melanogaster GN=pbl PE=2 SV=1	7.66667		NM_164871	Taf11	8.89383
Q9V4M2	Protein wech OS=Drosophila melanogaster GN=wech PE=1 SV=2	6.66667		NM_140584	Trs20	11.6275
P25991	Protein suppressor of forked OS=Drosophila melanogaster GN=su(f) PE=1 SV=2	2.33333		NM_143099	Sil1	9.73517
P25991-4	Isoform E of Protein suppressor of forked OS=Drosophila melanogaster GN=su(f)	2.33333		NM_001298517	CG14207	8.32187
Q9VUS0	CG7372 OS=Drosophila melanogaster GN=CG7372 PE=1 SV=2	4.66667		NM_078741	gkt	9.71448
P40945	ADP-ribosylation factor 2 OS=Drosophila melanogaster GN=Arf102F PE=1 SV=2	2.33333		NM_135507	Ripalpha	10.2735
P08879	Nucleoside diphosphate kinase OS=Drosophila melanogaster GN=awd PE=1 SV=3	3.66667		NM_137102	beta4GalNAcTA	10.4769
Q24573-2	Isoform A of Protein dead ringer OS=Drosophila melanogaster GN=retn	4.33333		NM_001299646	GstE11	2.20464
Q24573	Protein dead ringer OS=Drosophila melanogaster GN=retn PE=1 SV=2	4.33333		NM_057288	mago	10.0467
Q9VPH2	DNA primase large subunit OS=Drosophila melanogaster GN=DNApol-alpha60 PE=1 SV=2	4.33333		NM_001299882	CG30172	9.18729
Q9VRQ2	Mad2 OS=Drosophila melanogaster GN=mad2 PE=1 SV=1	3.33333		NM_139704	Pfdn4	11.1582
E1JJ45	Hephaestus, isoform Q OS=Drosophila melanogaster GN=heph PE=4 SV=1	4.66667		NR_124934	lncRNA:CR45120	5.44681
Q24174	Protein abrupt OS=Drosophila melanogaster GN=ab PE=1 SV=2	4		NR_133413	lncRNA:CR45223	7.3617
Q7PLI7-2	Isoform A of Serine/threonine-protein kinase CG17528 OS=Drosophila melanogaster GN=CG17528	3.66667		NR_133466	lncRNA:CR45991	2.84423
A1ZA92	Polynucleotide 5'-hydroxyl-kinase NOL9 OS=Drosophila melanogaster GN=CG8414 PE=2 SV=1	3.66667		NM_132590	CG2540	9.82784
Q9VPY4	CG4887 OS=Drosophila melanogaster GN=CG4887 PE=1 SV=1	3.33333		NM_001272372	Inx2	3.55497
A1Z8A5	Pipsqueak, isoform L OS=Drosophila melanogaster GN=psq PE=4 SV=1	3		NM_134991	MFS18	11.3387
Q8T0E7	CG10984, isoform A OS=Drosophila melanogaster GN=CG10984 PE=2 SV=1	3		NM_001273383	RpL13	3.25407
Q8IQI3	CG10984, isoform B OS=Drosophila melanogaster GN=CG10984 PE=1 SV=2	3		NM_001103894	CG34196	4.95435
Q8IR16	No on or off transient A, isoform B OS=Drosophila melanogaster GN=nonA PE=2 SV=1	2.33333		NM_136794	CG13231	9.26454
Q04047	Protein no-on-transient A OS=Drosophila melanogaster GN=nonA PE=1 SV=2	2.33333		NM_137128	Su(var)2-HP2	7.9768
Q04047-2	Isoform 2 of Protein no-on-transient A OS=Drosophila melanogaster GN=nonA	2.33333		NM_206244	Svil	3.38918
P48610-3	Isoform B of Arginine kinase OS=Drosophila melanogaster GN=Argk	2.33333		NM_142481	Cpsf73	8.01657
P48610-2	Isoform A of Arginine kinase OS=Drosophila melanogaster GN=Argk	2.33333		NM_206321	scyl	9.21872
Q7KVX4	Vap-33-1, isoform D OS=Drosophila melanogaster GN=Vap-33-1 PE=1 SV=1	9.33333		NM_141284	mRpL44	10.5852
Q9VAH9	CG1972 OS=Drosophila melanogaster GN=CG1972 PE=2 SV=1	16.3333		NM_142517	NP15.6	13.2113
Q26365-2	Isoform A of ADP,ATP carrier protein OS=Drosophila melanogaster GN=sesB	15		NM_001272127	Asator	7.94566
Q26365	ADP,ATP carrier protein OS=Drosophila melanogaster GN=sesB PE=2 SV=4	15		NM_001298593	CG14621	5.50937
Q0E8G1	Simjang, isoform A OS=Drosophila melanogaster GN=simj PE=1 SV=1	9.33333		NM_134986	Dim1	10.7028
Q960V1	LD33361p OS=Drosophila melanogaster GN=simj PE=2 SV=1	9.33333		NM_001273684	COX4	6.92499
Q9VS57	RE14391p OS=Drosophila melanogaster GN=sec63 PE=1 SV=1	9.66667		NR_124405	lncRNA:CR45306	3.92671
Q9VGF0	Midline fasciclin, isoform C OS=Drosophila melanogaster GN=mfas PE=2 SV=1	9		NM_079078	Acox57D-p	3.36337
Q9VGE9	GH11519p OS=Drosophila melanogaster GN=mfas PE=1 SV=1	9		NM_001202181	mex1	2.14281
Q86B97	Midline fasciclin, isoform H OS=Drosophila melanogaster GN=mfas PE=2 SV=1	9		NM_001259884	Rbp6	9.44858
Q86B96	Midline fasciclin, isoform E OS=Drosophila melanogaster GN=mfas PE=2 SV=1	9		NM_141136	CG11437	3.62637
Q86B94	Midline fasciclin, isoform J OS=Drosophila melanogaster GN=mfas PE=2 SV=1	9		NM_001316563	Myo81F	11.8422
Q86B95	Midline fasciclin, isoform F OS=Drosophila melanogaster GN=mfas PE=2 SV=1	9		NM_141510	CG7878	10.2771
Q9V877	Kinesin-like protein subito OS=Drosophila melanogaster GN=sub PE=1 SV=1	8.66667		NM_057538	Arl2	10.3102
P20439	G2/mitotic-specific cyclin-B OS=Drosophila melanogaster GN=CycB PE=1 SV=2	13.6667		NM_142927	CG10214	9.98787
Q9Y109	BcDNA.GH11023 OS=Drosophila melanogaster GN=BcDNA.GH11023 PE=1 SV=1	10.3333		NM_001276137	stg	8.27869
P20439-2	Isoform B of G2/mitotic-specific cyclin-B OS=Drosophila melanogaster GN=CycB	13.3333		NM_132394	CG17841	9.67437
Q9VZL3	Sc2 OS=Drosophila melanogaster GN=Sc2 PE=2 SV=1	8.33333		NM_166606	ppk3	5.51951
P20439-3	Isoform C of G2/mitotic-specific cyclin-B OS=Drosophila melanogaster GN=CycB	12.6667		NM_001316437	ftz-f1	4.05779
Q7KRU0	CG2246, isoform C OS=Drosophila melanogaster GN=CG2246 PE=1 SV=1	5.66667		NM_078564	hop	9.34514
Q8IMI0	CG2246, isoform B OS=Drosophila melanogaster GN=CG2246-RB PE=2 SV=1	5.66667		NM_132701	Nup93-1	8.09541
Q9VA53	CG2246, isoform A OS=Drosophila melanogaster GN=CG2246-RA PE=1 SV=2	5.66667		NM_138214	CG13898	4.89714
Q961V3	CG2246, isoform D OS=Drosophila melanogaster GN=CG2246 PE=1 SV=1	5.66667		NM_079211	Sse	6.23571
Q9VKC8	FI03495p OS=Drosophila melanogaster GN=Tom70 PE=1 SV=2	9		NM_001202322	CG42668	10.0115
Q9VBK9	CG5913 OS=Drosophila melanogaster GN=CG5913 PE=1 SV=1	7		NM_132770	Cox17	12.3362
Q9VX69	CG5162 OS=Drosophila melanogaster GN=CG5162 PE=2 SV=1	14		NM_140394	JMJD7	9.11914
Q6NR30	CG14478, isoform A OS=Drosophila melanogaster GN=BEST:LD13441 PE=1 SV=1	10.3333		NM_001038923	CG34039	9.03997
Q9VGS2	Translationally-controlled tumor protein homolog OS=Drosophila melanogaster GN=Tctp PE=1 SV=1	7.33333		NM_142402	Nnk	7.52616
Q8IQW5	CG14207, isoform B OS=Drosophila melanogaster GN=HspB8 PE=2 SV=1	3.66667		NM_078505	swa	2.44753
Q9VQ58	CG15356 OS=Drosophila melanogaster GN=CG15356 PE=1 SV=1	6.66667		NM_132482	CG11752	12.4763
Q9VAQ0	Cullin-5 OS=Drosophila melanogaster GN=Cul-5 PE=1 SV=1	11.3333		NM_001273472	Qtzl	5.72154
Q9V6K1-2	Isoform 2 of Tripeptidyl-peptidase 2 OS=Drosophila melanogaster GN=TppII	5.66667		NM_136334	CG8245	13.7646
Q9V6K1	Tripeptidyl-peptidase 2 OS=Drosophila melanogaster GN=TppII PE=1 SV=2	5.66667		NM_142446	CG7142	3.38991
Q7K2X8	Nup44A, isoform A OS=Drosophila melanogaster GN=Nup44A PE=1 SV=1	19		NM_057343	Prosalpha3	12.1832
Q24338	Polycomb protein esc OS=Drosophila melanogaster GN=esc PE=1 SV=1	6.33333		NM_144256	CG15577	2.26619
Q7KHK4	Comb gap OS=Drosophila melanogaster GN=cg PE=1 SV=1	4.66667		NM_001275653	btsz	3.91174
A1Z9M4	Combgap, isoform C OS=Drosophila melanogaster GN=cg PE=4 SV=1	4.66667		NM_130665	CG2680	9.81969
Q8T9L6	CG13900, isoform B OS=Drosophila melanogaster GN=CG13900 PE=2 SV=1	14.6667		NM_131993	spoon	5.58251
O97183	GH07456p OS=Drosophila melanogaster GN=RpII33 PE=1 SV=1	5		NM_167239	X11Lbeta	6.42702
O77430	EG:115C2.4 protein OS=Drosophila melanogaster GN=skpA PE=1 SV=1	5		NM_132587	CG11085	4.86092
E1JGL5	CG5174, isoform L OS=Drosophila melanogaster GN=CG5174 PE=4 SV=1	5.66667		NR_047943	snoRNA:SC35-a	3.38652
A1ZB80	CG5174, isoform A OS=Drosophila melanogaster GN=CG5174-RA PE=2 SV=1	5.66667		NM_001273864	Optix	9.9325
A1ZB83	CG5174, isoform B OS=Drosophila melanogaster GN=CG5174 PE=4 SV=1	5.66667		NM_139458	CG1317	6.45136
P02299	Histone H3 OS=Drosophila melanogaster GN=His3 PE=1 SV=4	4		NM_176370	in	2.85642
Q9W2U7	CG17255, isoform A OS=Drosophila melanogaster GN=nocte PE=1 SV=4	3		NM_141387	CG17919	8.16232
A1ZB77	CG5174, isoform J OS=Drosophila melanogaster GN=CG5174 PE=1 SV=1	5.66667		NM_143619	RpL6	7.6765
O44081-2	Isoform C of H/ACA ribonucleoprotein complex subunit 4 OS=Drosophila melanogaster GN=Nop60B	4.66667		NM_141646	RnpS1	9.99706
Q9VPC0	Serine/threonine-protein kinase PITSLRE OS=Drosophila melanogaster GN=Pitslre PE=1 SV=1	6.33333		NM_141198	CG9776	9.5625
A8DYD2	Combgap, isoform J OS=Drosophila melanogaster GN=cg PE=4 SV=2	6		NM_001043087	mRpL34	9.071
P84249	Histone H3.3 OS=Drosophila melanogaster GN=His3.3A PE=1 SV=2	4		NM_168401	ect	2.75777
Q9VVB8	Limpet, isoform A OS=Drosophila melanogaster GN=Lmpt PE=2 SV=1	2.33333		NM_141531	CG7483	10.3397
B7YZE6	Combgap, isoform I OS=Drosophila melanogaster GN=cg PE=4 SV=1	5.66667		NM_133157	ND-18	13.0736
A8DYD1	Combgap, isoform G OS=Drosophila melanogaster GN=cg PE=4 SV=1	5.66667		NM_079506	Ubc6	13.7038
A8DYD3	Combgap, isoform F OS=Drosophila melanogaster GN=cg PE=4 SV=1	5.66667		NM_141977	CG10126	3.42944
A1Z9M3	Combgap, isoform B OS=Drosophila melanogaster GN=cg PE=1 SV=1	5.66667		NM_001104272	CG6567	9.34602
Q9VTZ1	GH11602p OS=Drosophila melanogaster GN=Pcaf PE=1 SV=1	7.66667		NM_001275890	Mitofilin	3.87744
P49630	60S ribosomal protein L36 OS=Drosophila melanogaster GN=RpL36 PE=3 SV=1	5.66667		NM_142719	CG15497	5.88224
Q9VWG3	40S ribosomal protein S10b OS=Drosophila melanogaster GN=RpS10b PE=1 SV=2	10.6667		NM_080091	Faa	6.97248
Q9VJ19	RE25263p OS=Drosophila melanogaster GN=RpL30 PE=2 SV=1	10.3333		NM_166413	Rx	8.92673
Q8I937	CG32409 OS=Drosophila melanogaster GN=CG32409 PE=2 SV=2	2.33333		NM_135202	COX5B	7.18661
O97125	Heat shock protein 68 OS=Drosophila melanogaster GN=Hsp68 PE=1 SV=1	9		NM_165049	DIP-kappa	7.94287
Q9VZ22	CG1908 OS=Drosophila melanogaster GN=CG1908 PE=1 SV=1	3		NM_143730	Vha36-1	14.7617
Q9VGK7	Putative elongator complex protein 1 OS=Drosophila melanogaster GN=CG10535 PE=1 SV=2	14.6667		NM_164653	DIP-theta	12.1218
Q9VFS6	AT14917p OS=Drosophila melanogaster GN=omd PE=2 SV=2	16.3333		NM_001043144	CG4998	4.543
Q8IR23	GH13542p OS=Drosophila melanogaster GN=vap PE=2 SV=2	16.3333		NM_001169364	CG32017	5.72734
Q9W323	LD27988p OS=Drosophila melanogaster GN=l(1)G0232 PE=2 SV=2	11.3333		NM_078655	mRpL22	11.6691
Q9W324	LP18470p OS=Drosophila melanogaster GN=l(1)G0232 PE=2 SV=2	11.3333		NM_139616	Cpr64Ab	8.68749
Q8IRM7	LD30065p OS=Drosophila melanogaster GN=l(1)G0232 PE=2 SV=1	11.3333		NR_074047	asRNA:CR44062	3.14529
Q494K2	CG13350 OS=Drosophila melanogaster GN=CG13350 PE=2 SV=1	10		NM_164578	tutl	3.26594
Q8IRZ3	Sperm-specific dynein intermediate chain 3 OS=Drosophila melanogaster GN=Sdic3 PE=2 SV=2	8.66667		NM_135720	Fam92	5.65505
A1ZA83	CG8397 OS=Drosophila melanogaster GN=CG8397 PE=4 SV=1	5.66667		NM_136636	CG13739	10.3396
Q9VNE2	Protein extra bases OS=Drosophila melanogaster GN=exba PE=1 SV=1	6.33333		NM_139809	Mis12	10.0354
Q8MT36	Probable histone-lysine N-methyltransferase Mes-4 OS=Drosophila melanogaster GN=Mes-4 PE=1 SV=2	11		NM_139879	CG14837	7.00671
Q9VW09	E3 ubiquitin-protein ligase listerin OS=Drosophila melanogaster GN=l(3)76BDr PE=1 SV=2	9		NM_140986	CG4858	11.4791
Q59E36	REST corepressor OS=Drosophila melanogaster GN=CoRest PE=1 SV=1	8.33333		NR_003882	snoRNA:Psi28S-3091b	2.92378
Q9VUZ6	CG5018 OS=Drosophila melanogaster GN=CG5018-RA PE=2 SV=1	7.33333		NM_142027	CG9799	8.10862
Q9W2N6	CG9346 OS=Drosophila melanogaster GN=CG9346 PE=1 SV=1	8.66667		NM_001260353	Uck	8.78538
Q9W1N4	HL01517p OS=Drosophila melanogaster GN=wmd PE=2 SV=1	10		NM_001014722	peb	4.09555
Q9VFS5-2	Isoform D of Serine/threonine-protein phosphatase 4 regulatory subunit 3 OS=Drosophila melanogaster GN=flfl	6.66667		NM_167580	CG32554	7.15798
Q9VFS5	Serine/threonine-protein phosphatase 4 regulatory subunit 3 OS=Drosophila melanogaster GN=flfl PE=1 SV=4	6.66667		NM_165165	CG5953	3.9729
Q9VMW9	GDP-mannose 4,6 dehydratase OS=Drosophila melanogaster GN=Gmd PE=1 SV=2	6.66667		NR_124445	lncRNA:CR44442	6.7856
Q9VUZ0	BcDNA.LD10457 OS=Drosophila melanogaster GN=SsRbeta PE=1 SV=2	4.66667		NM_137296	CG8306	9.48078
Q9W1H8	GH13256p OS=Drosophila melanogaster GN=Thiolase PE=2 SV=1	8		NM_139906	Srp9	11.424
C0PUX5	MIP03616p OS=Drosophila melanogaster GN=sgg PE=2 SV=1	5.66667		NM_001144489	Rbp6	4.28958
Q7KVY5	Shaggy, isoform K OS=Drosophila melanogaster GN=sgg PE=1 SV=1	5.66667		NM_079540	alphaTub84D	12.9595
Q86CW5	Hmr OS=Drosophila melanogaster GN=Hmr PE=1 SV=1	8		NM_001300361	CG6813	5.22615
Q7JUY1	Gustavus, isoform A OS=Drosophila melanogaster GN=gus PE=1 SV=1	4.33333		NM_142704	AP-2sigma	14.4397
A1Z6D7	Gustavus, isoform B OS=Drosophila melanogaster GN=gus PE=2 SV=1	4.33333		NM_001275963	AP-1sigma	6.91218
A1Z6E2	Gustavus, isoform F OS=Drosophila melanogaster GN=gus PE=4 SV=1	4.33333		NM_143021	Ppox	7.13793
A1Z6E0	Gustavus, isoform D OS=Drosophila melanogaster GN=gus PE=1 SV=1	4.33333		NM_079764	asp	5.39336
A1Z6D9	Gustavus, isoform E OS=Drosophila melanogaster GN=gus PE=2 SV=1	4.33333		NM_001298509	mRpS14	2.37486
Q9Y128	BcDNA.GH07688 OS=Drosophila melanogaster GN=cert PE=1 SV=1	6.66667		NM_001103646	Snoo	7.71886
Q9VIG1	CG12050 OS=Drosophila melanogaster GN=CG12050-RB PE=2 SV=2	5.66667		NM_001273572	Tpr2	10.2892
Q9VEG8	CG31249 OS=Drosophila melanogaster GN=CG7477 PE=2 SV=2	3.33333		NM_001259526	CG13502	3.42528
A1Z7A8	Coilin, isoform D OS=Drosophila melanogaster GN=coil PE=2 SV=1	5.66667		NM_001274588	Rac2	7.47609
Q9VL71	LD29830p OS=Drosophila melanogaster GN=Srp54 PE=1 SV=1	5.66667		NM_169953	Rab1	13.3682
Q9VKD3	Probable cysteine desulfurase, mitochondrial OS=Drosophila melanogaster GN=CG12264 PE=2 SV=1	5.33333		NR_123808	lncRNA:CR44498	4.23012
Q8IQ95	Pebble, isoform D OS=Drosophila melanogaster GN=pbl PE=1 SV=1	7.33333		NM_001169621	babo	2.78246
Q9W2I2	CG9752 OS=Drosophila melanogaster GN=CG9752 PE=2 SV=1	3.66667		NM_001104161	Rbp6	6.93719
Q9VLD6-2	Isoform B of Borealin OS=Drosophila melanogaster GN=borr	5		NM_001275509	MtnA	4.55139
Q9W394	CG32708 OS=Drosophila melanogaster GN=CG32708 PE=2 SV=1	3.66667		NM_001273743	crc	7.52714
Q9I7K6	Protein NASP homolog OS=Drosophila melanogaster GN=CG8223 PE=1 SV=1	4.66667		NM_001300368	dpr17	7.05741
Q9U7D8	Pebble OS=Drosophila melanogaster GN=pbl PE=1 SV=1	6.66667		NM_001272496	X11Lbeta	9.27508
A8JNN0	Pebble, isoform E OS=Drosophila melanogaster GN=pbl PE=4 SV=1	6.66667		NM_001274531	tant	6.82888
Q9W088	DNA polymerase delta small subunit OS=Drosophila melanogaster GN=CG12018 PE=2 SV=1	4.33333		NM_206138	resilin	2.22955
Q8INS9	GST-containing FLYWCH zinc-finger protein, isoform D OS=Drosophila melanogaster GN=gfzf PE=2 SV=2	4.66667		NM_001038861	CG33465	11.6881
Q9V9S8	Ferrochelatase, mitochondrial OS=Drosophila melanogaster GN=Fech PE=2 SV=1	4.66667		NM_166625	CG4797	5.97736
Q9W0K4	Protein bric-a-brac 2 OS=Drosophila melanogaster GN=bab2 PE=1 SV=2	5.66667		NM_130659	CG2652	2.31003
Q9VPD2	Cytosolic Fe-S cluster assembly factor NUBP2 homolog OS=Drosophila melanogaster GN=CG4858 PE=1 SV=1	3.66667		NM_136572	CG13751	10.3529
Q9VSZ4	CG3437 OS=Drosophila melanogaster GN=CG3437 PE=4 SV=2	3.66667		NM_001259956	CG43330	4.36379
Q8SY39	CG32344 OS=Drosophila melanogaster GN=CG6994 PE=2 SV=1	4.66667		NR_124460	lncRNA:CR45267	5.54701
Q9VM49	CG11266, isoform A OS=Drosophila melanogaster GN=CG11266 PE=1 SV=1	5		NM_001300403	dpr9	11.032
P91938-2	Isoform A of Thioredoxin reductase 1, mitochondrial OS=Drosophila melanogaster GN=Trxr-1	3		NM_130565	Rab27	9.12232
P91938-4	Isoform D of Thioredoxin reductase 1, mitochondrial OS=Drosophila melanogaster GN=Trxr-1	3		NM_139403	CG2021	10.6417
P91938-3	Isoform C of Thioredoxin reductase 1, mitochondrial OS=Drosophila melanogaster GN=Trxr-1	3		NM_001297919	Glos	6.66597
Q9VHM2	UPF0505 protein CG8202 OS=Drosophila melanogaster GN=CG8202 PE=2 SV=3	3.33333		NM_001038729	SkpA	6.85488
P91938	Thioredoxin reductase 1, mitochondrial OS=Drosophila melanogaster GN=Trxr-1 PE=1 SV=2	3		NM_132163	Dok	7.64292
Q9VEF5	CG7379 OS=Drosophila melanogaster GN=CG7379 PE=1 SV=1	4		NM_057490	Cbp53E	15.3754
Q9VKH9	CENP-ana OS=Drosophila melanogaster GN=cana PE=1 SV=2	3		NM_140029	CG4942	9.39876
Q9VSC1	Signal recognition particle 9 kDa protein OS=Drosophila melanogaster GN=Srp9 PE=1 SV=1	3.33333		NM_141022	CG10581	9.19749
Q9VR89	RNA-binding protein pno1 OS=Drosophila melanogaster GN=l(1)G0004 PE=1 SV=1	4		NM_142963	Kal1	6.28814
Q7PL82	Spf45, isoform C OS=Drosophila melanogaster GN=Spf45 PE=4 SV=2	3.33333		NM_140512	CG7857	9.28384
Q7PL83	FI02801p OS=Drosophila melanogaster GN=Spf45 PE=1 SV=1	3.33333		NM_001274548	CG10147	7.17763
P29310-2	Isoform VI' of 14-3-3 protein zeta OS=Drosophila melanogaster GN=14-3-3zeta	2.66667		NM_143189	CG42235	7.965
Q9V9S8-3	Isoform C of Ferrochelatase, mitochondrial OS=Drosophila melanogaster GN=Fech	3.66667		NM_001297907	CG18508	5.1369
Q9VG59	CG5608 OS=Drosophila melanogaster GN=CG5608-RA PE=1 SV=1	3.66667		NM_139887	CG7506	10.7327
Q7PL81	RE44883p OS=Drosophila melanogaster GN=Spf45 PE=2 SV=2	3		NM_079883	CaMKI	5.02119
Q9Y145	BcDNA.GH04978 OS=Drosophila melanogaster GN=BcDNA.GH04978 PE=1 SV=1	3.66667		NM_001299114	CG10211	4.28502
Q0E9C2	Enhancer of polycomb, isoform A OS=Drosophila melanogaster GN=E(Pc) PE=1 SV=1	3.66667		NR_133110	lncRNA:acal	2.20868
Q9V486	CG32016, isoform D OS=Drosophila melanogaster GN=CG32016 PE=2 SV=2	3.33333		NM_001104200	nvd	4.74983
Q9VGN9	Probable ribosome biogenesis protein RLP24 OS=Drosophila melanogaster GN=CG6764 PE=1 SV=1	2.66667		NM_139622	CG15011	8.25773
Q8IMG1	CG1910, isoform C OS=Drosophila melanogaster GN=CG1910 PE=2 SV=1	2		NM_136953	Ak6	8.95405
Q9V9U3	CG1910, isoform A OS=Drosophila melanogaster GN=CG1910 PE=2 SV=1	2		NM_001347812	Sur	4.19372
Q8I0J1	CG1910, isoform B OS=Drosophila melanogaster GN=CG1910 PE=2 SV=1	2		NM_140174	CG7839	7.76073
Q9VNE0	CG2926 OS=Drosophila melanogaster GN=CG2926 PE=1 SV=1	2.66667		NR_125233	lncRNA:CR45647	2.61054
Q9VPY0	CG4785 OS=Drosophila melanogaster GN=CG4785 PE=1 SV=1	2.66667		NM_078642	Cyp1	15.3433
B7Z0D7	CG7504, isoform B OS=Drosophila melanogaster GN=CG7504 PE=4 SV=1	2		NM_001273485	CG5446	5.47583
Q86B79	RING finger protein unkempt OS=Drosophila melanogaster GN=unk PE=1 SV=1	2		NM_165573	CG30380	6.12639
P48610-4	Isoform C of Arginine kinase OS=Drosophila melanogaster GN=Argk	2		NM_135216	Ube4A	10.464
Q0E965	SRPK, isoform A OS=Drosophila melanogaster GN=SRPK PE=2 SV=1	2		NM_143581	Chchd3	12.4994
A8JNP2	Arginine kinase, isoform E OS=Drosophila melanogaster GN=Argk PE=3 SV=1	2		NM_058054	Rap2l	11.0816
P09052	ATP-dependent RNA helicase vasa, isoform A OS=Drosophila melanogaster GN=vas PE=1 SV=3	14		NM_132426	CG15209	12.0813
O02002	Caspase-1 OS=Drosophila melanogaster GN=Dcp-1 PE=1 SV=1	11.3333		NM_057466	18w	8.82902
E1JIK0	Heterogeneous nuclear ribonucleoprotein at 87F, isoform C OS=Drosophila melanogaster GN=Hrb87F PE=2 SV=1	9.33333		NM_139686	Gen	6.04132
P48810	Heterogeneous nuclear ribonucleoprotein 87F OS=Drosophila melanogaster GN=Hrb87F PE=1 SV=2	9.33333		NM_141641	CG8149	10.359
P48810-2	Isoform B of Heterogeneous nuclear ribonucleoprotein 87F OS=Drosophila melanogaster GN=Hrb87F	9		NM_139514	CG11537	6.70298
Q9VRQ1	CG5537 OS=Drosophila melanogaster GN=CG5537 PE=1 SV=1	6		NM_168828		8.96243
Q27889	Serine/threonine-protein phosphatase 2B catalytic subunit 2 OS=Drosophila melanogaster GN=Pp2B-14D PE=1 SV=2	12.3333		NM_001275982	Ms	5.60883
Q9VE34	Ectopic P granules protein 5 homolog OS=Drosophila melanogaster GN=CG14299 PE=1 SV=2	19.3333		NM_138027	Xxylt	13.0909
Q9W1N1	Pita, isoform B OS=Drosophila melanogaster GN=pita PE=2 SV=2	5.66667		NM_143710	Coq7	11.409
A1Z9G2	CG6197 OS=Drosophila melanogaster GN=CG6197 PE=1 SV=1	19.6667		NM_132997	stas	11.8664
Q27884	Serine/threonine-protein phosphatase 6 catalytic subunit OS=Drosophila melanogaster GN=PpV PE=2 SV=1	10		NM_135029	CG3036	7.40763
Q95RJ9	F-box-like/WD repeat-containing protein ebi OS=Drosophila melanogaster GN=ebi PE=1 SV=2	9		NM_001169539	Mst36Fb	2.95569
Q6AWG9-2	Isoform B of Uncharacterized protein CG5098 OS=Drosophila melanogaster GN=CG5098	5.33333		NM_165869	RpS11	4.45551
Q6AWG9	Uncharacterized protein CG5098 OS=Drosophila melanogaster GN=CG5098 PE=1 SV=1	5.33333		NM_136939	Nup54	7.70448
Q9VHS8	eIF4AIII OS=Drosophila melanogaster GN=eIF4AIII PE=1 SV=1	11		NM_079019	Polr1A	8.31091
Q0E8J0	MEP-1, isoform A OS=Drosophila melanogaster GN=MEP-1 PE=1 SV=1	11.6667		NM_143774	Prosbeta1	11.6537
Q9VIF0	Nucleolar complex protein 2 homolog OS=Drosophila melanogaster GN=CG9246 PE=1 SV=1	11.6667		NM_166277	BomS2	4.41919
Q8SXY6	Transmembrane emp24 domain-containing protein bai OS=Drosophila melanogaster GN=bai PE=2 SV=1	5		NM_206339	CG11658	3.00833
P20193	Protein suppressor of variegation 3-7 OS=Drosophila melanogaster GN=Su(var)3-7 PE=1 SV=4	6		NM_001300273	CG1307	6.07449
E1JIJ9	Suppressor of variegation 3-7, isoform B OS=Drosophila melanogaster GN=Su(var)3-7 PE=4 SV=1	5.66667		NM_001274416	Shab	4.87993
Q9VEX9	Histone deacetylase complex subunit SAP18 OS=Drosophila melanogaster GN=Bin1 PE=1 SV=1	5.33333		NM_001298151	CG34408	4.03989
Q9V3J4	Sec13 OS=Drosophila melanogaster GN=sec13 PE=2 SV=1	10		NM_001273398	GATAd	6.81084
Q9W410	CG3815 OS=Drosophila melanogaster GN=CG3815 PE=1 SV=2	5.66667		NM_137450	EMRE	13.2674
Q9XZ57	Eb1, isoform E OS=Drosophila melanogaster GN=Eb1 PE=2 SV=1	7.33333		NM_139596	CG1136	8.29808
Q7JZD3	Eb1, isoform A OS=Drosophila melanogaster GN=Eb1 PE=1 SV=1	7.33333		NM_142007	CG8483	9.55921
Q7KRW8	Pre-mRNA-processing factor 39 OS=Drosophila melanogaster GN=CG1646 PE=1 SV=1	4.66667		NM_142777	CG7059	6.41048
Q7KRW8-3	Isoform A of Pre-mRNA-processing factor 39 OS=Drosophila melanogaster GN=CG1646	4.33333		NM_170097	CG31142	9.3099
Q9VIW5	CG10237, isoform B OS=Drosophila melanogaster GN=CG10237 PE=2 SV=2	9.33333		NM_140316	CG32104	7.92077
Q7KRW8-2	Isoform D of Pre-mRNA-processing factor 39 OS=Drosophila melanogaster GN=CG1646	4.66667		NM_135419	CG9541	3.86281
Q9I7M3	CG10237, isoform A OS=Drosophila melanogaster GN=CG10237 PE=1 SV=1	8.66667		NR_048086	lncRNA:CR43605	4.45765
Q8INW5	CG10237, isoform C OS=Drosophila melanogaster GN=CG10237-RC PE=2 SV=1	8.66667		NM_001169876	CG15012	13.3752
B7Z0V1	TBP-associated factor 7, isoform B OS=Drosophila melanogaster GN=Taf7 PE=4 SV=1	4.33333		NM_168145	QC	8.54584
Q9VHY5	Transcription initiation factor TFIID subunit 7 OS=Drosophila melanogaster GN=Taf7 PE=1 SV=1	4.33333		NM_138012	thoc5	8.98123
Q9V493	CG11076, isoform A OS=Drosophila melanogaster GN=CG11076-RA PE=1 SV=3	7.66667		NM_001170285	CG34354	10.8351
Q7JXF5	GH12838p OS=Drosophila melanogaster GN=Nup62 PE=1 SV=1	2.66667		NM_139535	eIF1	13.7778
Q9VTT3	CG17153 OS=Drosophila melanogaster GN=ssp PE=1 SV=1	2.66667		NM_001104215	Cdep	13.3977
Q9VCY1	CG6937 OS=Drosophila melanogaster GN=CG6937 PE=1 SV=1	4.66667		NM_166623	egl	6.8557
Q9VTT2	LD20590p OS=Drosophila melanogaster GN=l(3)j2D3 PE=1 SV=1	5		NR_133212	lncRNA:CR46006	6.25035
Q9VD66	Female-specific independent of transformer OS=Drosophila melanogaster GN=fit PE=1 SV=1	8.33333		NM_001273679	sick	6.55552
Q9VD14	CG13850 OS=Drosophila melanogaster GN=CG13850 PE=2 SV=3	6.66667		NM_164863	Trx-2	7.57183
Q24186	40S ribosomal protein S5a OS=Drosophila melanogaster GN=RpS5a PE=1 SV=1	8.33333		NM_079111	Taldo	10.9911
P41375	Eukaryotic translation initiation factor 2 subunit 2 OS=Drosophila melanogaster GN=eIF-2beta PE=1 SV=1	12.6667		NM_001169844	hfp	7.8933
Q95RQ8	LD15650p OS=Drosophila melanogaster GN=pita PE=1 SV=1	6.33333		NM_168388	CG6707	5.01714
Q9W1C8	CG3163 OS=Drosophila melanogaster GN=CG3163 PE=1 SV=2	8		NM_001259374	stj	5.40527
P49963	Signal recognition particle 19 kDa protein OS=Drosophila melanogaster GN=Srp19 PE=2 SV=2	5.66667		NM_164698	CG31633	9.55397
Q9VYX1	Enhancer of yellow 2 transcription factor OS=Drosophila melanogaster GN=e(y)2 PE=1 SV=1	4.33333		NM_169906	TFAM	6.34504
Q9VAF4	Dim gamma-tubulin 1 OS=Drosophila melanogaster GN=dgt1 PE=1 SV=2	6.33333		NM_143596	CG12054	10.6454
Q9VIH3	Microsomal triacylglycerol transfer protein OS=Drosophila melanogaster GN=Mtp PE=1 SV=2	3.33333		NM_140103	Ilp3	9.66881
Q8MSW9	CG33505 OS=Drosophila melanogaster GN=U3-55K PE=2 SV=1	5.66667		NM_143200	Sld5	6.63648
Q9VKQ3	Ribosome biogenesis protein WDR12 homolog OS=Drosophila melanogaster GN=CG6724 PE=1 SV=1	6.33333		NM_001275156	Tom20	9.87824
Q9VEB3	Ribosome production factor 2 homolog OS=Drosophila melanogaster GN=CG7993 PE=2 SV=3	2		NM_176218	Patronin	5.68658
Q0E993	Valyl-tRNA synthetase, isoform A OS=Drosophila melanogaster GN=Aats-val PE=1 SV=1	13.3333		NM_142456	CG15803	9.86189
Q9VLT5-2	Isoform B of Protein purity of essence OS=Drosophila melanogaster GN=poe	19		NM_001272217	CG14818	6.8471
Q9VW83	Gigas OS=Drosophila melanogaster GN=gig PE=2 SV=1	14.3333		NM_001201785	PAPLA1	5.12869
Q9V3R3	CG3704 OS=Drosophila melanogaster GN=EG:BACR7A4.17 PE=1 SV=1	6.66667		NM_057411	Egfr	5.24295
A0AQH0	Proteasome subunit beta type OS=Drosophila melanogaster GN=Prosbeta1 PE=2 SV=1	7		NM_001043225	CG34117	11.1382
Q7KUA4	LD22577p OS=Drosophila melanogaster GN=Uba2 PE=2 SV=1	7.33333		NM_169880	ClpX	2.96781
Q9VYY2	Signal peptidase complex subunit 2 OS=Drosophila melanogaster GN=Spase25 PE=2 SV=1	9.33333		NM_143471	CG7789	9.78343
E2QC56	CG10417, isoform B OS=Drosophila melanogaster GN=CG10417 PE=3 SV=1	7		NM_143526	CG9737	5.67539
Q7K4Q5	Probable protein phosphatase CG10417 OS=Drosophila melanogaster GN=CG10417 PE=1 SV=1	7		NM_136450	Cyt-b5	10.2111
Q9W2X2	CG34408, isoform A OS=Drosophila melanogaster GN=CG34408-RA PE=2 SV=3	11		NM_139517	BtbVII	9.23085
B7Z138	CG34408, isoform D OS=Drosophila melanogaster GN=CG34408 PE=4 SV=1	11		NM_080334	mRpL30	11.2363
Q8IRL5	CG34408, isoform B OS=Drosophila melanogaster GN=CG34408 PE=4 SV=2	11		NM_136372	Bap170	8.39416
Q9VX91	E3 ubiquitin-protein ligase UBR1 OS=Drosophila melanogaster GN=UBR1 PE=2 SV=2	9.66667		NM_057966	RpL39	12.7336
Q9VZT1	Gryzun, isoform A OS=Drosophila melanogaster GN=gry PE=2 SV=3	7.66667		NR_124888	lncRNA:CR45036	3.93385
A1Z6E6	D4, isoform C OS=Drosophila melanogaster GN=d4 PE=4 SV=1	5.66667		NM_168162	Best2	7.08554
Q8IRE3	Gryzun, isoform B OS=Drosophila melanogaster GN=gry PE=2 SV=2	7.66667		NM_001104055	CG10274	7.5476
Q7K3G5	D4, isoform A OS=Drosophila melanogaster GN=d4 PE=1 SV=1	5.66667		NM_001273671	CdGAPr	5.99309
Q9VXG8	Serine/threonine-protein kinase ATR OS=Drosophila melanogaster GN=mei-41 PE=1 SV=2	9.66667		NM_170227	Muc96D	5.79914
B7Z140	CG34408, isoform C OS=Drosophila melanogaster GN=CG34408 PE=4 SV=1	9.66667		NM_001298072	Gclc	7.64008
O18333	GH01619p OS=Drosophila melanogaster GN=Rab2 PE=1 SV=1	6		NM_140726	QIL1	14.2648
O18332	FI01544p OS=Drosophila melanogaster GN=Rab1 PE=1 SV=1	4.33333		NM_169902	CG5191	5.61631
Q9VTH1	Angelman syndrome OS=Drosophila melanogaster GN=Ube3a PE=1 SV=1	6		NM_132365	CG43386	3.36578
Q59E36-2	Isoform 2 of REST corepressor OS=Drosophila melanogaster GN=CoRest	7.66667		NM_144126	CG17059	11.1775
O97066	GM04682p OS=Drosophila melanogaster GN=twr PE=2 SV=1	6.33333		NM_079288	Ilp2	7.85827
Q9VUQ8	DCN1-like protein OS=Drosophila melanogaster GN=CG7427 PE=1 SV=2	5.66667		NM_001300235	CG1129	5.7228
Q9VV89	Nonclathrin coat protein zeta-COP OS=Drosophila melanogaster GN=zetaCOP PE=2 SV=2	5		NM_143158	CG4743	10.1004
Q24253	Beta adaptin OS=Drosophila melanogaster GN=Bap PE=1 SV=1	7		NM_057819	nrv1	6.43262
Q9W0L7	CG32479 OS=Drosophila melanogaster GN=CG13903 PE=1 SV=2	5.66667		NM_079047	robl	13.3709
Q8IGK3	RE73180p OS=Drosophila melanogaster GN=Su(var)2-10 PE=2 SV=1	5.66667		NM_057740	Gycalpha99B	14.9979
A1Z7P7	Suppressor of variegation 2-10, isoform H OS=Drosophila melanogaster GN=Su(var)2-10 PE=4 SV=1	5.66667		NM_079973	CG10939	8.6321
A1Z7P5	Suppressor of variegation 2-10, isoform I OS=Drosophila melanogaster GN=Su(var)2-10 PE=1 SV=1	5.66667		NM_135252	Nuf2	4.2944
Q95RX5	CG11984, isoform D OS=Drosophila melanogaster GN=CG11984 PE=1 SV=1	7		NM_130641	CG2865	3.27719
P92204	Negative elongation factor E OS=Drosophila melanogaster GN=Nelf-E PE=1 SV=1	4.33333		NM_001298565	tbc	11.1346
Q9VCG0	CG13599 OS=Drosophila melanogaster GN=CG13599 PE=1 SV=1	6.33333		NM_001103760	whip	7.13035
Q9XTM1	Exocyst complex component 5 OS=Drosophila melanogaster GN=sec10 PE=1 SV=1	6.33333		NM_137694	ND-B14.7	13.2621
Q9W590	Large subunit GTPase 1 homolog OS=Drosophila melanogaster GN=ns3 PE=1 SV=1	5.66667		NM_140302	Tsen54	9.03445
Q7KQM8	CG11076, isoform B OS=Drosophila melanogaster GN=CG11076 PE=2 SV=1	6		NM_143050	CG11069	6.98342
Q9VB08	E3 ubiquitin-protein ligase RING1 OS=Drosophila melanogaster GN=Sce PE=1 SV=1	5		NM_142648	Cpr92F	11.7921
Q8IRL9	CG2990, isoform B OS=Drosophila melanogaster GN=CG2990-RB PE=2 SV=1	6.33333		NM_078669	Sh	13.3836
Q9V3I2	Drab5 OS=Drosophila melanogaster GN=Rab5 PE=2 SV=1	6.66667		NM_138222	dpr20	12.0135
Q961G1	Conserved oligomeric Golgi complex subunit 3 OS=Drosophila melanogaster GN=Cog3 PE=1 SV=1	7.66667		NM_167230	CG32683	9.68598
Q9VPR6	Ipk2 OS=Drosophila melanogaster GN=Ipk2 PE=1 SV=2	5.66667		NM_134831	CG3609	3.78487
Q7YZA2	Uncharacterized protein CG7065 OS=Drosophila melanogaster GN=CG7065 PE=1 SV=1	5.33333		NR_124236	lncRNA:CR45684	4.48517
Q95TN4	Conserved oligomeric Golgi complex subunit 4 OS=Drosophila melanogaster GN=CG7456 PE=1 SV=1	5.66667		NM_165310	CG31697	2.78552
Q9W0R7	CG32343, isoform B OS=Drosophila melanogaster GN=CG32343 PE=1 SV=3	7.66667		NM_058106	cass	12.6554
Q9W335	LD26546p OS=Drosophila melanogaster GN=l(1)G0320 PE=1 SV=1	3.66667		NM_001103703	Fas3	6.61228
Q9VL89	Methionine aminopeptidase OS=Drosophila melanogaster GN=und PE=1 SV=1	4		NM_001201786	PAPLA1	3.51228
Q9NHV9	Protein vav OS=Drosophila melanogaster GN=vav PE=2 SV=2	6.66667		NM_057797	tos	7.23158
A8JUQ9	Vav, isoform C OS=Drosophila melanogaster GN=vav PE=4 SV=1	6.66667		NR_073619	lncRNA:CR43958	5.25772
Q9I7L8	Cdc23 OS=Drosophila melanogaster GN=cdc23 PE=1 SV=2	5.33333		NM_137221	bug	10.7652
Q7JRI6	CG5174, isoform H OS=Drosophila melanogaster GN=CG5174 PE=2 SV=1	4		NR_125101	lncRNA:CR44332	6.32833
A1ZB79	CG5174, isoform M OS=Drosophila melanogaster GN=CG5174 PE=4 SV=2	4		NM_138225	CG13907	9.93853
Q9VU15	CG10754 OS=Drosophila melanogaster GN=CG10754 PE=1 SV=1	5.33333		NM_169374	cu	4.66739
Q8IRW8-2	Isoform 2 of Histone-lysine N-methyltransferase trr OS=Drosophila melanogaster GN=trr	6		NR_033156	Uhg4	10.1092
Q8IRW8	Histone-lysine N-methyltransferase trr OS=Drosophila melanogaster GN=trr PE=1 SV=2	6		NM_167821	mthl14	8.13838
Q9VKM6	Vacuolar protein sorting-associated protein 72 homolog OS=Drosophila melanogaster GN=YL-1 PE=1 SV=1	4.33333		NM_001014460	sau	3.15114
Q9VNP3	Mes2, isoform B OS=Drosophila melanogaster GN=Mes2 PE=2 SV=1	5.66667		NM_001103943	CG34208	3.43382
Q9XZ11	CG7139, isoform A OS=Drosophila melanogaster GN=CG7139 PE=1 SV=1	6.66667		NM_001103757	ACC	2.17649
P08630-2	Isoform A of Tyrosine-protein kinase Btk29A OS=Drosophila melanogaster GN=Btk29A	5.66667		NM_132607	CG4661	4.79056
P08630	Tyrosine-protein kinase Btk29A OS=Drosophila melanogaster GN=Btk29A PE=2 SV=2	5.66667		NM_139937	eIF4E3	2.50162
Q9VKU7	Gamma-tubulin complex component 4 homolog OS=Drosophila melanogaster GN=Grip75 PE=1 SV=2	5		NM_143066	bai	11.9529
Q9VCU6	HP1c OS=Drosophila melanogaster GN=HP1c PE=2 SV=1	4.66667		NM_057705	Odc2	3.45306
Q9VL96	Pescadillo homolog OS=Drosophila melanogaster GN=CG4364 PE=1 SV=1	4.66667		NM_141096	CG14570	5.28843
Q9VLD6	Borealin OS=Drosophila melanogaster GN=borr PE=1 SV=1	4.66667		NM_168117	Uev1A	9.37952
Q9VS37	Cdc27 OS=Drosophila melanogaster GN=Cdc27 PE=1 SV=1	4		NM_139724	Eaf6	8.59024
A1ZB78	CG5174, isoform G OS=Drosophila melanogaster GN=CG5174 PE=4 SV=1	4		NM_001110981	CG41099	3.08608
Q29QE1	GH15984p OS=Drosophila melanogaster GN=RhoGAP1A PE=2 SV=1	4.66667		NM_001275366	elm	9.99514
Q8IG95	Mes2, isoform C OS=Drosophila melanogaster GN=Mes2 PE=2 SV=1	5		NM_001258797	Sh	7.11425
Q9Y1B2	Origin recognition complex subunit 6 OS=Drosophila melanogaster GN=Orc6 PE=2 SV=2	3.66667		NM_166836	ewg	6.53999
Q7KSB5	CG4390, isoform B OS=Drosophila melanogaster GN=CG4390 PE=2 SV=1	4		NM_130493	CG13365	11.6029
Q7KN94	Walrus, isoform A OS=Drosophila melanogaster GN=wal PE=1 SV=1	4.33333		NM_001258885	Sam-S	6.28905
P25992	Yemanuclein-alpha OS=Drosophila melanogaster GN=yemalpha PE=1 SV=1	3.66667		NM_001104168	Sgf11	9.09088
Q9VDP9	CG4390, isoform A OS=Drosophila melanogaster GN=CG4390 PE=2 SV=1	4		NM_001300526	E2f1	3.35201
Q8IQ96	Pebble, isoform C OS=Drosophila melanogaster GN=pbl PE=2 SV=1	6.33333		NM_001043264	CG34138	5.6035
A1Z841	Cdc2-related-kinase, isoform B OS=Drosophila melanogaster GN=cdc2rk PE=4 SV=1	4		NM_001258475	RpS3A	7.18522
A1ZAU2	CG18431 OS=Drosophila melanogaster GN=CG18431-RA PE=2 SV=1	3		NM_001316640	Sh	5.56317
Q9VKZ8	Ubiquitin carboxyl-terminal hydrolase OS=Drosophila melanogaster GN=CG5384 PE=2 SV=1	3.66667		NM_058070	Taf10b	11.9593
Q9W253	LD41023p OS=Drosophila melanogaster GN=mRpS29 PE=2 SV=1	4.33333		NM_164787	Bsg	5.7115
Q9VWE7	LD26789p OS=Drosophila melanogaster GN=Ranbp21 PE=2 SV=1	4.66667		NM_165685	CG30338	6.06417
Q9VXL5	CG8924, isoform A OS=Drosophila melanogaster GN=CG8924 PE=1 SV=1	4.33333		NM_001103804	CG34228	10.4844
Q9VNV3	ATP-dependent RNA helicase Ddx1 OS=Drosophila melanogaster GN=Ddx1 PE=2 SV=1	3.33333		NM_137584	CG15120	2.21769
Q9VU43	FI04407p OS=Drosophila melanogaster GN=SRm160 PE=1 SV=1	3.66667		NM_168009	ckd	4.8541
Q9VFE7	CG7262 OS=Drosophila melanogaster GN=CG7262 PE=1 SV=1	4		NM_001259848	CG18081	7.40605
A1Z7A9	Coilin, isoform C OS=Drosophila melanogaster GN=coil PE=4 SV=1	3.66667		NR_073940	lncRNA:CR43951	5.65136
O96532	Rad17 OS=Drosophila melanogaster GN=Rad17 PE=2 SV=2	4		NM_142255	Fbxl7	4.91592
Q9VKI0	CENP-meta OS=Drosophila melanogaster GN=cmet PE=2 SV=2	3		NM_079679	sqz	8.00149
Q06849	ADP-ribosylation factor-like protein 2 OS=Drosophila melanogaster GN=Arf84F PE=2 SV=2	3		NM_140217	Mob2	8.14988
Q7K0K1	CG2063 OS=Drosophila melanogaster GN=CG2063 PE=1 SV=1	4		NM_166429	Xpd	7.90059
Q9VLQ1	GH09240p OS=Drosophila melanogaster GN=wol PE=2 SV=1	3		NM_079452	sNPF-R	5.49068
Q9GYU8	Nuclear pore complex protein Nup88 OS=Drosophila melanogaster GN=mbo PE=1 SV=2	3.33333		NM_134984	CG3652	11.8552
P29310	14-3-3 protein zeta OS=Drosophila melanogaster GN=14-3-3zeta PE=1 SV=1	2.33333		NM_057695	CG4038	6.13595
Q24044	FI02843p OS=Drosophila melanogaster GN=fzy PE=1 SV=1	4.33333		NM_001273362	numb	9.5368
Q9VXB3	Histone deacetylase complex subunit SAP30 homolog OS=Drosophila melanogaster GN=Sap30 PE=1 SV=1	2.33333		NM_001014458	CG33543	13.6771
Q9VKZ0	GATAd OS=Drosophila melanogaster GN=GATAd PE=1 SV=2	3.33333		NM_001298008	Ubi-p5E	5.45479
Q9VUA0	G patch domain-containing protein 1 homolog OS=Drosophila melanogaster GN=CG8833 PE=1 SV=1	2.66667		NM_001258755	acj6	4.00466
Q9VZV3	CG11486, isoform C OS=Drosophila melanogaster GN=CG11486 PE=4 SV=3	3.66667		NM_001273314	Btk29A	3.64973
Q7KV83	CG11486, isoform F OS=Drosophila melanogaster GN=CG11486-RK PE=2 SV=1	3.66667		NM_057742	Rab2	12.2054
P29310-3	Isoform C of 14-3-3 protein zeta OS=Drosophila melanogaster GN=14-3-3zeta	2.33333		NM_137648	Nnf1a	9.442
Q0E9C8	Pipsqueak, isoform D OS=Drosophila melanogaster GN=psq PE=4 SV=1	3		NM_001103955	ReepA	3.71608
Q9I7T8	CG11486, isoform A OS=Drosophila melanogaster GN=CG11486-RB PE=2 SV=1	3.66667		NM_206212	speck	2.91935
Q8IRE7	CG11486, isoform L OS=Drosophila melanogaster GN=CG11486 PE=4 SV=1	3.66667		NM_139780	Sf3b6	11.9757
A8JNJ2	CG11486, isoform O OS=Drosophila melanogaster GN=CG11486 PE=4 SV=1	3.66667		NM_169068	Rheb	8.62946
A1Z8A6	Pipsqueak, isoform I OS=Drosophila melanogaster GN=psq PE=4 SV=1	3		NM_142787	CG12499	7.21282
Q95RR8	CG11486, isoform G OS=Drosophila melanogaster GN=CG11486 PE=1 SV=1	3.66667		NR_133276	lncRNA:CR45941	4.68248
Q8ST83	Polycomb protein PHO OS=Drosophila melanogaster GN=pho PE=1 SV=2	2.66667		NM_001104316	cv-c	6.69495
P54611	V-type proton ATPase subunit E OS=Drosophila melanogaster GN=Vha26 PE=1 SV=1	3		NM_165392	CG2225	4.36132
Q7KTH8	COP9 signalosome complex subunit 8 OS=Drosophila melanogaster GN=CSN8 PE=1 SV=1	1.66667		NM_079287	ATPsynB	14.9456
Q8IPA8	CG33695, isoform A OS=Drosophila melanogaster GN=CG33695 PE=2 SV=1	3.33333		NM_001015224	MED21	4.10561
Q9V3P3	LD45860p OS=Drosophila melanogaster GN=REG PE=1 SV=1	3.33333		NM_143529	CG18404	2.44251
Q9Y124	BcDNA.GH08385 OS=Drosophila melanogaster GN=BcDNA.GH08385 PE=1 SV=1	3.66667		NR_124344	lncRNA:CR45333	10.7079
Q9VL02	GH08677p OS=Drosophila melanogaster GN=nmd PE=1 SV=1	3.33333		NM_136961	CG8778	10.0977
P08646	Ras-like protein 1 OS=Drosophila melanogaster GN=Ras85D PE=1 SV=2	2.33333		NM_001258539	CG14797	4.74742
Q9W2E7	Rae1 OS=Drosophila melanogaster GN=Rae1 PE=2 SV=1	3		NM_130725	CG15239	3.38633
Q9VR56	RNA (guanine-9-)-methyltransferase domain-containing protein 2 homolog OS=Drosophila melanogaster GN=CG14618 PE=2 SV=1	2.66667		NM_001103549	CG34328	4.92992
P27091	Protein 60A OS=Drosophila melanogaster GN=gbb PE=1 SV=1	3		NM_057471	AP-2alpha	12.6461
Q7K4B2	CG7845 OS=Drosophila melanogaster GN=CG7845 PE=1 SV=1	2.66667		NR_073722	asRNA:CR43820	3.67415
A1Z7L1	CG13745 OS=Drosophila melanogaster GN=FANCI PE=1 SV=2	3		NM_001169515	kek3	9.65464
P13002-1	Isoform N of Protein grainyhead OS=Drosophila melanogaster GN=grh	2.66667		NM_137104	conv	2.94874
P13002-2	Isoform B of Protein grainyhead OS=Drosophila melanogaster GN=grh	2.66667		NR_124717	asRNA:CR44807	2.81342
P13002-3	Isoform C of Protein grainyhead OS=Drosophila melanogaster GN=grh	2.66667		NM_141306	CG12171	9.79731
Q9W5P1	Mediator of RNA polymerase II transcription subunit 21 OS=Drosophila melanogaster GN=MED21 PE=1 SV=1	1.66667		NM_001273519	CG18507	3.07226
Q9VVL6	Mediator of RNA polymerase II transcription subunit 19 OS=Drosophila melanogaster GN=MED19 PE=1 SV=1	1.66667		NM_137397	CCHa1-R	8.33749
P13002	Protein grainyhead OS=Drosophila melanogaster GN=grh PE=2 SV=3	2.66667		NM_001298742	Acox3	6.45047
Q9VHG6	CG9740 OS=Drosophila melanogaster GN=CG9740 PE=1 SV=1	2.66667		NM_134644	CG11374	5.79828
Q9VBY6	CG11820 OS=Drosophila melanogaster GN=PQBP1 PE=1 SV=1	3		NM_175972	Rtnl1	2.46039
Q9VLK1	CG13097 OS=Drosophila melanogaster GN=CG13097 PE=1 SV=1	1.66667		NM_206042	CheB42c	5.30369
Q9VRN3	Eaf6 OS=Drosophila melanogaster GN=Eaf6 PE=1 SV=1	1.66667		NM_057609	Taf5	9.60004
A1ZA18	Kinesin-73, isoform A OS=Drosophila melanogaster GN=Khc-73 PE=1 SV=1	2.33333		NM_169103	jagn	9.70821
Q9VSE1	CG7504, isoform C OS=Drosophila melanogaster GN=CG7504 PE=1 SV=1	1.66667		NM_143627	CG11563	9.46428
Q9VWG2	CG14220 OS=Drosophila melanogaster GN=CG14220-RA PE=1 SV=1	2.33333		NM_001299090	Sytalpha	9.63079
Q9VKN7	Serine/threonine-protein kinase Ial OS=Drosophila melanogaster GN=ial PE=1 SV=1	1.66667		NM_001043236	CG12817	10.9065
Q03043	cGMP-dependent protein kinase, isozyme 2 forms cD4/T1/T3A/T3B OS=Drosophila melanogaster GN=for PE=1 SV=3	1.66667		NM_170546	qless	9.27569
Q9VZK1	CG14985 OS=Drosophila melanogaster GN=CG14985-RB PE=1 SV=3	1.66667		NM_001275860	hdly	7.68636
P52029	Glucose-6-phosphate isomerase OS=Drosophila melanogaster GN=Pgi PE=2 SV=2	1.66667		NR_124781	lncRNA:CR45156	5.90282
Q9VI82	Nucleolar complex protein 3 homolog OS=Drosophila melanogaster GN=CG1234 PE=1 SV=1	1.66667		NM_206407	siz	5.65755
Q9V474	BcDNA.LD26519 OS=Drosophila melanogaster GN=dbr PE=1 SV=1	1.66667		NM_142047	flfl	11.0353
Q03043-2	Isoform T3A of cGMP-dependent protein kinase, isozyme 2 forms cD4/T1/T3A/T3B OS=Drosophila melanogaster GN=for	1.66667		NM_136146	CG13077	4.01561
Q03043-3	Isoform T3B of cGMP-dependent protein kinase, isozyme 2 forms cD4/T1/T3A/T3B OS=Drosophila melanogaster GN=for	1.66667		NM_141539	Atg13	10.0357
Q8IR39	Topoisomerase 1, isoform B OS=Drosophila melanogaster GN=Top1 PE=2 SV=1	1.66667		NM_140917	CG14186	12.597
A8JNP1	Arginine kinase, isoform F OS=Drosophila melanogaster GN=Argk PE=3 SV=2	1.66667		NM_138202	MED30	9.11817
P48610	Arginine kinase OS=Drosophila melanogaster GN=Argk PE=1 SV=2	1.66667		NM_168799	CG32212	2.91781
Q9V4F9	Mediator of RNA polymerase II transcription subunit 26 OS=Drosophila melanogaster GN=MED26 PE=1 SV=2	1.66667		NM_135395	mRpL51	10.7026
A1ZA05	SRPK, isoform C OS=Drosophila melanogaster GN=SRPK PE=1 SV=1	1.66667		NM_166691	CG30423	13.3363
Q9VCN1	DNA polymerase OS=Drosophila melanogaster GN=DNApol-epsilon PE=1 SV=3	16.3333		NM_143065	Ythdf	7.69995
Q9W3D3	Calmodulin-binding protein related to a Rab3 GDP/GTP exchange protein, isoform A OS=Drosophila melanogaster GN=Crag PE=2 SV=3	10.6667		NM_141331	Rpn5	11.6288
Q9W3D2	Calmodulin-binding protein related to a Rab3 GDP/GTP exchange protein, isoform B OS=Drosophila melanogaster GN=Crag PE=2 SV=3	10.3333		NM_001275914	Octbeta1R	12.1355
A1Z9L2	Reduction in Cnn dots 1, isoform C OS=Drosophila melanogaster GN=Rcd1 PE=4 SV=1	11.3333		NM_140203	CG6163	4.87317
A1Z9L0	LD05087p OS=Drosophila melanogaster GN=Rcd1 PE=2 SV=1	11.3333		NM_001259861	CG5151	10.778
Q9W541	EIF2B-epsilon protein OS=Drosophila melanogaster GN=eIF2B-epsilon PE=2 SV=1	6.33333		NM_165357	CG31627	7.0972
Q0E8K5	AT10158p OS=Drosophila melanogaster GN=mri PE=1 SV=1	6.66667		NM_176359	pip	4.36309
Q0E915	Par-1, isoform C OS=Drosophila melanogaster GN=par-1 PE=2 SV=1	7.66667		NM_079663	Prx3	12.143
E1JGN0	Par-1, isoform P OS=Drosophila melanogaster GN=par-1 PE=4 SV=1	7.66667		NM_166259	CG30325	4.93999
A1ZBM1	Par-1, isoform E OS=Drosophila melanogaster GN=par-1 PE=4 SV=1	7.66667		NM_176415	CG1142	10.4902
A1ZBM0	Par-1, isoform F OS=Drosophila melanogaster GN=par-1 PE=4 SV=1	7.66667		NM_169498	Ravus	9.182
A1ZBL9	Par-1, isoform G OS=Drosophila melanogaster GN=par-1 PE=4 SV=1	7.66667		NM_001258532	futsch	13.0236
A1ZBL7	Par-1, isoform H OS=Drosophila melanogaster GN=par-1 PE=4 SV=1	7.66667		NM_135946	CG4278	9.04646
Q7YU80	Par-1, isoform R OS=Drosophila melanogaster GN=par-1 PE=2 SV=1	7.33333		NM_138139	Tina-1	9.47931
E1JGM9	Par-1, isoform S OS=Drosophila melanogaster GN=par-1 PE=4 SV=1	7.33333		NM_132998	CG8326	8.41846
Q6NPA6	Par-1, isoform L OS=Drosophila melanogaster GN=par-1 PE=1 SV=1	7.33333		NM_001272289	DIP-alpha	8.54578
Q9V8V8	PAR-1 OS=Drosophila melanogaster GN=par-1 PE=1 SV=2	7.33333		NM_137393	icln	9.03771
Q963E5	Par-1, isoform T OS=Drosophila melanogaster GN=par-1 PE=2 SV=1	7.33333		NM_165703	Prosalpha7	11.1201
A1ZBL5	Par-1, isoform B OS=Drosophila melanogaster GN=par-1 PE=1 SV=1	7.33333		NM_143136	alrm	12.5919
Q8T076	LD22513p OS=Drosophila melanogaster GN=Rcd1 PE=2 SV=1	12		NM_167308	Hsc70-3	3.13983
Q7KSU3	CG8379, isoform B OS=Drosophila melanogaster GN=CG8379 PE=2 SV=1	6.33333		NM_136925	Cpr49Ab	6.67814
Q7KMJ6	BcDNA.GH11110 OS=Drosophila melanogaster GN=nito PE=1 SV=1	5.33333		NM_001273289	Rack1	4.96696
Q9VHK5	CG8379, isoform A OS=Drosophila melanogaster GN=CG8379 PE=2 SV=2	6.33333		NM_140405	CG10710	5.14702
Q8T8R1	CCHC-type zinc finger protein CG3800 OS=Drosophila melanogaster GN=CG3800 PE=1 SV=1	3.66667		NM_001202203	wnd	6.08215
Q9VC48	Methionine aminopeptidase OS=Drosophila melanogaster GN=CG13630 PE=2 SV=1	7.66667		NM_001201764	Msp300	4.08911
Q9I7K5	Transmembrane emp24 domain-containing protein eca OS=Drosophila melanogaster GN=eca PE=1 SV=2	5.33333		NM_135474	mtDNA-helicase	5.90049
Q86BA5	LP01981p OS=Drosophila melanogaster GN=p24-2 PE=2 SV=1	4.66667		NM_001299682	CG7461	5.72151
Q24179-2	Isoform C of Protein sly1 homolog OS=Drosophila melanogaster GN=Slh	4		NM_001014479	RapGAP1	2.93334
Q24179-4	Isoform F of Protein sly1 homolog OS=Drosophila melanogaster GN=Slh	4		NM_001259304	CG2269	5.92645
Q9W4K0	CHOp24 OS=Drosophila melanogaster GN=CHOp24 PE=1 SV=1	5.66667		NM_167958	MEP-1	4.38568
Q9W246	CG4554 OS=Drosophila melanogaster GN=CG4554 PE=1 SV=2	4		NM_140152	ND-13B	13.2286
A1Z6P3	Eb1, isoform F OS=Drosophila melanogaster GN=Eb1 PE=2 SV=2	5.33333		NM_001300212	CG11309	2.57771
Q9I7S8	Multifunctional protein ADE2 OS=Drosophila melanogaster GN=ade5 PE=1 SV=2	14		NM_141209	lost	13.1761
Q9VZJ3	GH01794p OS=Drosophila melanogaster GN=Rcd5 PE=1 SV=1	5		NR_123991	lncRNA:CR45464	3.9862
Q9VFE4	40S ribosomal protein S5b OS=Drosophila melanogaster GN=RpS5b PE=2 SV=1	9.66667		NM_132301	CG7065	8.52305
Q9VAD4	EIF2B-alpha protein OS=Drosophila melanogaster GN=eIF2B-alpha PE=1 SV=1	5.66667		NM_137950	CG9815	2.84166
Q9VC05	Oxysterol-binding protein OS=Drosophila melanogaster GN=Osbp PE=1 SV=1	2.66667		NM_080382	Pdk1	7.03833
Q9V5C6	Proteasome subunit alpha type-3 OS=Drosophila melanogaster GN=Prosalpha7 PE=1 SV=1	9.66667		NM_139709	blanks	4.97102
Q9U1H9	Nuclear RNA export factor 1 OS=Drosophila melanogaster GN=sbr PE=1 SV=2	2.33333		NM_141214	CG1074	6.29294
Q9V5C6-2	Isoform B of Proteasome subunit alpha type-3 OS=Drosophila melanogaster GN=Prosalpha7	9.33333		NM_141266	CG12173	11.9765
Q9VJL9	AT12460p OS=Drosophila melanogaster GN=BG:DS02740.2 PE=2 SV=2	2.66667		NM_143474	Vps16B	8.21496
Q9VCQ7	LD40758p OS=Drosophila melanogaster GN=Rassf PE=1 SV=3	4		NM_001258876	Cda5	3.30956
Q9VN55	Antimeros OS=Drosophila melanogaster GN=atms PE=2 SV=1	4		NM_139755	Jon65Aiv	8.33784
Q9VEC8	CG7215, isoform A OS=Drosophila melanogaster GN=CG7215 PE=1 SV=1	4.66667		NM_001104448	CHKov1	8.5532
Q494M1	RE58921p OS=Drosophila melanogaster GN=Top1 PE=2 SV=1	1.66667		NM_001032405	kay	6.73079
P30189	DNA topoisomerase 1 OS=Drosophila melanogaster GN=Top1 PE=1 SV=1	1.66667		NM_001043254	Gyc89Da	4.89442
Q9V9Z9	Probable rRNA-processing protein EBP2 homolog OS=Drosophila melanogaster GN=CG1542 PE=2 SV=1	1.66667		NM_001038756	drd	7.73055
P11146	Heat shock 70 kDa protein cognate 2 OS=Drosophila melanogaster GN=Hsc70-2 PE=1 SV=2	5		NM_139837	MED4	9.19323
Q94546	Another transcription unit protein OS=Drosophila melanogaster GN=Atu PE=1 SV=2	2.66667		NM_079715	Polr1H	8.7361
P08985	Histone H2A.v OS=Drosophila melanogaster GN=His2Av PE=1 SV=2	3.33333		NM_001273034	aph-1	6.15444
P02255	Histone H1 OS=Drosophila melanogaster GN=His1 PE=1 SV=1	5.33333		NM_136153	Nf-YB	7.59894
Q4ABD8	Histone H1 OS=Drosophila melanogaster GN=His1:CG33807 PE=3 SV=1	5.33333		NM_001274132	Smurf	7.58329
Q4ABE3	Histone H1 OS=Drosophila melanogaster GN=His1:CG33801 PE=3 SV=1	5.33333		NM_080380	mRpS17	10.8039
Q4AB54	Histone H1 OS=Drosophila melanogaster GN=His1:CG33858 PE=3 SV=1	5.33333		NM_138250	Acat2	10.8083
Q9W350	C11.1 OS=Drosophila melanogaster GN=c11.1 PE=1 SV=2	19		NM_001258479	Arl4	8.60007
Q8INH7	Timeout OS=Drosophila melanogaster GN=timeout PE=1 SV=2	12		NM_143272	Cpr97Ea	4.53079
Q9VC56	Ubiquitin carboxyl-terminal hydrolase OS=Drosophila melanogaster GN=CG5794 PE=2 SV=2	15.6667		NM_137007	fsd	8.88027
Q8IMW2	Ubiquitin carboxyl-terminal hydrolase OS=Drosophila melanogaster GN=CG5794 PE=2 SV=1	15		NM_166243	CG30108	6.16463
Q94533	P70s6k protein kinase homolog OS=Drosophila melanogaster GN=S6k PE=2 SV=2	8		NM_001103910	CG34199	9.20706
Q9VXF1	Serine/threonine-protein phosphatase 2B catalytic subunit 3 OS=Drosophila melanogaster GN=CanA-14F PE=1 SV=4	10		NM_169098	Sec8	10.8312
Q9W543	CG17766 OS=Drosophila melanogaster GN=Rbcn-3B PE=2 SV=1	11.6667		NM_079191	RfC4	9.37632
Q9W552	Vacuolar protein sorting-associated protein 26 OS=Drosophila melanogaster GN=Vps26 PE=2 SV=1	7.66667		NM_001103973	CG13563	4.17785
Q9W4N9	CG2941 OS=Drosophila melanogaster GN=CG2941 PE=1 SV=2	10.3333		NM_001015402	CG41128	13.687
Q9VTS4	GH06247p OS=Drosophila melanogaster GN=Pop2 PE=2 SV=2	8.33333		NR_123768	lncRNA:CR44779	4.69712
Q8I0I5	Pop2, isoform B OS=Drosophila melanogaster GN=Pop2 PE=2 SV=1	8		NM_138043	CG3257	13.1432
P08111-2	Isoform p78 of Lethal(2) giant larvae protein OS=Drosophila melanogaster GN=l(2)gl	7		NM_137264	prim	11.832
Q9VF04	RE32990p OS=Drosophila melanogaster GN=Rbf2 PE=1 SV=1	9.33333		NM_137119	Sin1	9.81716
Q9V8K2	Exocyst complex component 3 OS=Drosophila melanogaster GN=sec6 PE=1 SV=2	7.66667		NM_079684	Surf6	9.26768
Q8IM98	ATP synthase-beta, isoform B OS=Drosophila melanogaster GN=ATPsyn-beta PE=2 SV=1	5.66667		NM_079809	Mtl	6.04425
O96989	CDC45L OS=Drosophila melanogaster GN=CDC45L PE=1 SV=1	7		NM_001043247	tefu	7.62191
P51406	Bystin OS=Drosophila melanogaster GN=bys PE=1 SV=2	5		NR_124354	lncRNA:CR44901	5.39218
Q9VDL0	Srp14, isoform B OS=Drosophila melanogaster GN=Srp14 PE=2 SV=2	4		NM_165005	bru1	5.22033
Q8IQP2	ZetaCOP, isoform C OS=Drosophila melanogaster GN=zetaCOP PE=2 SV=1	4.66667		NM_001260096	cwo	4.61907
O17468-3	Isoform 3 of Protein HIRA homolog OS=Drosophila melanogaster GN=Hira	6.66667		NM_206632	CG3566	5.88369
O17468-2	Isoform 2 of Protein HIRA homolog OS=Drosophila melanogaster GN=Hira	6.66667		NR_123935	lncRNA:CR45605	2.90426
Q9VC57	Atlastin OS=Drosophila melanogaster GN=atl PE=1 SV=1	4.66667		NM_001042903	CadN2	4.45014
Q9XYM5	LD27861p OS=Drosophila melanogaster GN=Su(var)2-10 PE=2 SV=1	5		NM_141064	Est-Q	5.12937
E1JIR4	Na pump alpha subunit, isoform I OS=Drosophila melanogaster GN=Atpalpha PE=3 SV=1	5.66667		NM_168929	ORMDL	11.2702
P13607	Sodium/potassium-transporting ATPase subunit alpha OS=Drosophila melanogaster GN=Atpalpha PE=1 SV=3	5.66667		NM_142880	Pex11c	5.30863
Q5BIG7	RE55465p OS=Drosophila melanogaster GN=Su(var)2-10 PE=2 SV=1	5		NM_142934	Ndc1	8.34347
Q7KNF5	Suppressor of variegation 2-10, isoform A OS=Drosophila melanogaster GN=Su(var)2-10 PE=2 SV=1	5		NM_143017	atl	5.22403
P13607-3	Isoform 3 of Sodium/potassium-transporting ATPase subunit alpha OS=Drosophila melanogaster GN=Atpalpha	5.66667		NM_058097	Manf	11.3552
P13607-2	Isoform 2 of Sodium/potassium-transporting ATPase subunit alpha OS=Drosophila melanogaster GN=Atpalpha	5.66667		NM_001298411	mthl1	6.51377
P13607-5	Isoform 5 of Sodium/potassium-transporting ATPase subunit alpha OS=Drosophila melanogaster GN=Atpalpha	5.66667		NM_168977	slif	5.67709
P13607-4	Isoform 4 of Sodium/potassium-transporting ATPase subunit alpha OS=Drosophila melanogaster GN=Atpalpha	5.66667		NM_143731	MED6	7.37157
P13607-7	Isoform 7 of Sodium/potassium-transporting ATPase subunit alpha OS=Drosophila melanogaster GN=Atpalpha	5.66667		NM_135152	Arpc4	11.0815
P13607-6	Isoform 6 of Sodium/potassium-transporting ATPase subunit alpha OS=Drosophila melanogaster GN=Atpalpha	5.66667		NM_001300028	vvl	5.75708
A1Z6S7	FI02061p OS=Drosophila melanogaster GN=vimar PE=2 SV=1	6		NM_079410	mRpS26	10.4953
A1Z6S6	RE54322p OS=Drosophila melanogaster GN=vimar PE=2 SV=1	6		NM_078651	mbt	9.85811
A1Z7Q1	Suppressor of variegation 2-10, isoform B OS=Drosophila melanogaster GN=Su(var)2-10 PE=4 SV=1	5		NM_001144603	Vti1b	7.22586
A1Z7P9	Suppressor of variegation 2-10, isoform C OS=Drosophila melanogaster GN=Su(var)2-10 PE=4 SV=1	5		NM_167996	CG32278	13.5625
A1Z7P8	Suppressor of variegation 2-10, isoform G OS=Drosophila melanogaster GN=Su(var)2-10 PE=4 SV=1	5		NM_142682	RhoGAP93B	11.7181
P22293	Protein suppressor of sable OS=Drosophila melanogaster GN=su(s) PE=1 SV=2	6.66667		NM_078827	kek2	11.4845
Q9VYG1	CG12096 OS=Drosophila melanogaster GN=CG12096 PE=1 SV=3	4.66667		NM_140608	CG4962	12.2928
Q95RC5	CG5745 OS=Drosophila melanogaster GN=CG5745 PE=1 SV=1	7.33333		NM_079459	Las	10.9911
Q24325	Transcription initiation factor TFIID subunit 2 OS=Drosophila melanogaster GN=Taf2 PE=1 SV=2	7		NM_001300127	CG11279	4.22085
E1JHX5	CG7611, isoform B OS=Drosophila melanogaster GN=CG7611 PE=4 SV=1	4.66667		NM_001110874	CG40498	7.17447
Q7K0L4	WD repeat-containing protein 26 homolog OS=Drosophila melanogaster GN=CG7611 PE=1 SV=1	4.66667		NM_131923	Tip60	6.96018
Q9W2Z4	CG2990, isoform C OS=Drosophila melanogaster GN=CG2990 PE=2 SV=2	6		NM_132019	AdamTS-B	3.91951
Q9VF56	CG5205 OS=Drosophila melanogaster GN=CG5205 PE=2 SV=2	5.66667		NM_169485	CG7381	5.18228
Q9VTY5	CG10646 OS=Drosophila melanogaster GN=CG10646 PE=2 SV=1	5.66667		NM_133087	Hou	11.2676
Q4Z8K6-3	Isoform C of Ran-binding proteins 9/10 homolog OS=Drosophila melanogaster GN=RanBPM	5.33333		NM_001038784	Jon25Bi	4.22282
Q4Z8K6-2	Isoform A of Ran-binding proteins 9/10 homolog OS=Drosophila melanogaster GN=RanBPM	5.33333		NM_001300249	ksr	7.17774
Q4Z8K6	Ran-binding proteins 9/10 homolog OS=Drosophila melanogaster GN=RanBPM PE=1 SV=1	5.33333		NM_169055	Snr1	10.6007
Q9VQY8	CG3338 OS=Drosophila melanogaster GN=CG3338 PE=1 SV=2	6		NM_057935	PheRS-m	11.3081
Q9VTL1	PCI domain-containing protein 2 homolog OS=Drosophila melanogaster GN=PCID2 PE=1 SV=2	4.33333		NM_141040	pzg	5.32764
A1Z7S0	Receptor mediated endocytosis 8 OS=Drosophila melanogaster GN=Rme-8 PE=4 SV=1	5.33333		NM_141208	CG14647	10.727
Q9W3L1	RE04053p OS=Drosophila melanogaster GN=Upf2 PE=2 SV=1	5		NM_140647	Rpn12	11.7423
Q494G8	Fbl6, isoform A OS=Drosophila melanogaster GN=fbl6 PE=2 SV=1	3.33333		NM_144312	CG16978	3.38296
O76932	Serine/threonine-protein phosphatase 4 catalytic subunit OS=Drosophila melanogaster GN=Pp4-19C PE=2 SV=1	4		NM_165393	CG2225	7.58636
A1Z7Q8	Alicorn OS=Drosophila melanogaster GN=alc PE=1 SV=1	4.66667		NM_130707	CG14270	11.2437
Q9W0K9	CG9205, isoform A OS=Drosophila melanogaster GN=CG9205 PE=1 SV=1	5		NM_001298181	CG44385	4.48204
Q9VDM6	Eukaryotic translation initiation factor 3 subunit G-2 OS=Drosophila melanogaster GN=eIF3-S4-2 PE=2 SV=1	4		NM_001272779	Tao	4.03128
Q9V3C4	BcDNA.LD05563 OS=Drosophila melanogaster GN=Gem3 PE=1 SV=1	4.66667		NM_134672	CG11562	9.07918
Q8T498	Probable Ras GTPase-activating protein OS=Drosophila melanogaster GN=CG42684 PE=1 SV=3	5.66667		NM_134768	CG17660	10.5743
Q8T498-2	Isoform A of Probable Ras GTPase-activating protein OS=Drosophila melanogaster GN=CG42684	5.66667		NM_057361	Sb	2.24791
Q8IQZ6	CG42270, isoform D OS=Drosophila melanogaster GN=CG42270 PE=4 SV=2	5.66667		NM_140032	Use1	9.715
Q9VM17	SOSS complex subunit B homolog OS=Drosophila melanogaster GN=CG5181 PE=2 SV=1	4.33333		NM_001316491	Madm	2.23164
Q7KSP5	Lethal (3) neo38, isoform B OS=Drosophila melanogaster GN=l(3)neo38 PE=2 SV=1	4.33333		NM_141463	Ir84a	4.60367
Q9VSP0	CG6511 OS=Drosophila melanogaster GN=CG6511 PE=1 SV=2	5.33333		NM_142046	omd	2.76908
P07664	Serendipity locus protein delta OS=Drosophila melanogaster GN=Sry-delta PE=1 SV=2	4.33333		NM_143395	wat	9.9634
Q8SZN9	Lethal (3) neo38, isoform A OS=Drosophila melanogaster GN=l(3)neo38 PE=1 SV=1	3.66667		NM_001104444	CG31103	9.62284
Q9VYG3	CG4332 OS=Drosophila melanogaster GN=CG4332 PE=1 SV=1	5		NM_132160	CG2059	2.82235
P41900	General transcription factor IIF subunit 2 OS=Drosophila melanogaster GN=TfIIFbeta PE=2 SV=2	3.33333		NM_167175	CG32706	8.1697
Q9VVA4	CG9674, isoform A OS=Drosophila melanogaster GN=CG9674 PE=1 SV=2	4		NM_001259286	Su(var)2-10	7.42398
E1JHM5	CG31687, isoform B OS=Drosophila melanogaster GN=CG31687 PE=4 SV=1	4.33333		NM_136958	spt4	10.3155
P16378-2	Isoform B of Guanine nucleotide-binding protein G(o) subunit alpha 47A OS=Drosophila melanogaster GN=G-oalpha47A	3.33333		NM_001274456	CG14982	10.3732
P00522	Tyrosine-protein kinase Abl OS=Drosophila melanogaster GN=Abl PE=1 SV=3	4		NM_001259795	CycA	4.11666
Q8INV1	CG31687, isoform A OS=Drosophila melanogaster GN=CG31687 PE=2 SV=2	4		NM_142686	Bdbt	10.249
P16378	Guanine nucleotide-binding protein G(o) subunit alpha 47A OS=Drosophila melanogaster GN=G-oalpha47A PE=1 SV=1	3.33333		NR_125043	lncRNA:CR45430	2.97775
A8JNU2	Abl tyrosine kinase, isoform B OS=Drosophila melanogaster GN=Abl PE=4 SV=1	4		NM_137320	CG6429	4.74308
Q9VP27	CG33214 OS=Drosophila melanogaster GN=CG33214 PE=1 SV=2	4		NM_001144406	Mrtf	2.53221
Q9VRL1	LD28904p OS=Drosophila melanogaster GN=Uev1A PE=2 SV=1	3		NM_140387	CG14105	5.01289
Q7JWH6	CG1888 OS=Drosophila melanogaster GN=CG1888 PE=1 SV=1	4.33333		NM_001202345	eIF4EHP	12.9586
Q8IQ53	MIP16420p OS=Drosophila melanogaster GN=Uev1A PE=2 SV=1	3		NM_001144636	5PtaseI	7.50017
Q9VSI6	Isocitrate dehydrogenase [NADP] OS=Drosophila melanogaster GN=Idh PE=1 SV=2	2.66667		NM_170487	aralar1	5.26894
Q7KUB0	Isocitrate dehydrogenase [NADP] OS=Drosophila melanogaster GN=Idh PE=2 SV=1	2.66667		NM_135534	CG4972	11.1471
Q7KUB1	Isocitrate dehydrogenase [NADP] OS=Drosophila melanogaster GN=Idh PE=2 SV=1	2.66667		NM_001144678	CG10804	9.71121
B7Z0E0	Isocitrate dehydrogenase [NADP] OS=Drosophila melanogaster GN=Idh PE=3 SV=1	2.66667		NM_001273099	mRpL27	5.62389
Q29R09	CG2924, isoform A OS=Drosophila melanogaster GN=CG2924 PE=1 SV=1	2.66667		NM_136693	Pal1	3.13946
Q8IQA7	Isocitrate dehydrogenase [NADP] OS=Drosophila melanogaster GN=Idh PE=2 SV=1	2.66667		NM_165868	RpS11	9.28051
A1ZBW4	Bancal, isoform D OS=Drosophila melanogaster GN=bl PE=4 SV=1	4.33333		NM_141728	CG12420	4.11384
Q9NEF6	Probable V-type proton ATPase subunit D 2 OS=Drosophila melanogaster GN=Vha36-3 PE=1 SV=1	2.66667		NM_143045	CG13641	4.22868
Q9VIZ2	Lethal (2) 37Cd OS=Drosophila melanogaster GN=l(2)37Cd PE=2 SV=1	4.33333		NM_001273740	CG8671	5.42718
P42207-2	Isoform B of Septin-1 OS=Drosophila melanogaster GN=Sep1	3		NM_166150	sotv	12.3718
Q9VKR0	CG6750 OS=Drosophila melanogaster GN=CG6750 PE=2 SV=1	3.33333		NM_079050	RpL18A	13.2438
Q9VL59	Zinc finger CCCH-type with G patch domain-containing protein OS=Drosophila melanogaster GN=CG4709 PE=2 SV=1	4		NM_141379	Osi15	4.42304
Q9VXF9	AT13091p OS=Drosophila melanogaster GN=rngo PE=1 SV=1	2		NM_058134	Fcp3C	6.00923
Q7KKH3	Protein SDA1 homolog OS=Drosophila melanogaster GN=Mys45A PE=1 SV=1	3.66667		NM_142194	CG5038	8.78206
A1ZB29	CG5757 OS=Drosophila melanogaster GN=CG5757 PE=3 SV=1	2.66667		NR_124042	lncRNA:CR45706	8.22932
Q08473-4	Isoform D of RNA-binding protein squid OS=Drosophila melanogaster GN=sqd	2		NM_079389	Syx8	10.594
E1JH23	Oxysterol-binding protein OS=Drosophila melanogaster GN=CG1513 PE=3 SV=1	4.66667		NM_130558	CG14787	7.86026
A1ZB82	CG5174, isoform K OS=Drosophila melanogaster GN=CG5174 PE=4 SV=1	3		NM_137201	CG8187	11.5675
Q9VPX4	FI01003p OS=Drosophila melanogaster GN=Tfb4 PE=2 SV=2	3.33333		NM_170493	spdo	3.40287
Q9VR42	CG3008 OS=Drosophila melanogaster GN=CG3008 PE=2 SV=1	3.33333		NM_137132	CG10139	3.63217
Q8T626	Protein disks lost OS=Drosophila melanogaster GN=dlt PE=1 SV=2	4.33333		NM_079825	dmrt99B	4.81482
P46415	Alcohol dehydrogenase class-3 OS=Drosophila melanogaster GN=Fdh PE=1 SV=3	2.33333		NM_141945	vrs	2.42886
P41073-3	Isoform C of Zinc finger protein on ecdysone puffs OS=Drosophila melanogaster GN=Pep	3.33333		NM_169828	CG31229	9.39964
P41073	Zinc finger protein on ecdysone puffs OS=Drosophila melanogaster GN=Pep PE=1 SV=1	3.33333		NM_057788	Ssb-c31a	10.9578
Q9W3D1	Caf1-180 OS=Drosophila melanogaster GN=Caf1-180 PE=2 SV=1	2.33333		NM_135557	CG5188	8.09691
Q9VV60	LD21116p OS=Drosophila melanogaster GN=Aats-tyr PE=1 SV=1	2		NR_124439	lncRNA:CR45471	5.56544
Q9VWD4	Probable RNA-binding protein CG14230 OS=Drosophila melanogaster GN=CG14230 PE=1 SV=2	2.66667		NM_141624	CG16749	7.52241
Q8T4C4	ATP synthase subunit beta OS=Drosophila melanogaster GN=CG5389 PE=2 SV=1	3.66667		NM_001259659	CG11537	2.75004
Q0E8B3	CG41454 OS=Drosophila melanogaster GN=CG41454 PE=4 SV=1	3.33333		NM_001169306	if	2.27261
P49071	MAP kinase-activated protein kinase 2 OS=Drosophila melanogaster GN=MAPk-Ak2 PE=1 SV=1	2		NM_130718	HIP	9.54946
Q94515	Des-1 protein OS=Drosophila melanogaster GN=ifc PE=2 SV=1	2.66667		NM_001103826	ND-MWFE	11.4842
A4V402	LD26767p OS=Drosophila melanogaster GN=MAPk-Ak2 PE=2 SV=1	2		NM_141551	SLIRP2	8.57117
Q9W2P0	Dim gamma-tubulin 3 OS=Drosophila melanogaster GN=dgt3 PE=2 SV=2	2		NM_001276005	CycB3	3.14786
Q9VYA7	RRP12-like protein OS=Drosophila melanogaster GN=CG2691 PE=1 SV=2	3.66667		NM_001014747	nonA	7.64465
Q9VEC3	Actin-related protein 5 OS=Drosophila melanogaster GN=Arp5 PE=1 SV=1	3		NM_206649	CG2258	6.61941
Q8IPI7	CG11266, isoform C OS=Drosophila melanogaster GN=CG11266 PE=2 SV=1	3.66667		NM_165250	Fas3	2.77229
Q9NBK5-2	Isoform A of Serine/threonine-protein kinase tricorner OS=Drosophila melanogaster GN=trc	3		NM_136554	Vps25	10.8489
Q9NBK5	Serine/threonine-protein kinase tricorner OS=Drosophila melanogaster GN=trc PE=1 SV=1	3		NM_176424	aqz	14.1394
Q9VI70	CG2656 OS=Drosophila melanogaster GN=CG2656 PE=2 SV=2	3.33333		NM_001298922	CG44008	3.37611
Q9VJ87	Pre-mRNA-splicing factor CWC22 homolog OS=Drosophila melanogaster GN=ncm PE=1 SV=3	3.66667		NM_137228	CG8320	10.7994
Q9VSA4	Tonsoku-like protein OS=Drosophila melanogaster GN=CG7457 PE=1 SV=1	3.33333		NM_137415	Ir54a	3.52653
Q9VX88	CG8949 OS=Drosophila melanogaster GN=CG8949 PE=2 SV=2	2		NM_001275731	m-cup	10.7784
Q8MSB1	CG31357 OS=Drosophila melanogaster GN=CG13638 PE=1 SV=1	3		NM_001272598	CG15760	10.6959
Q7KMI3	BcDNA.LD23371 OS=Drosophila melanogaster GN=BcDNA.LD23371 PE=1 SV=1	1.33333		NR_133060	lncRNA:CR46258	3.31614
Q9VKC7	CG6766 OS=Drosophila melanogaster GN=CG6766-RA PE=1 SV=1	2		NM_001202007	Agps	2.6566
P40797	Protein peanut OS=Drosophila melanogaster GN=pnut PE=1 SV=2	2.33333		NM_137849	RpS24	12.4703
Q24185	Protein hook OS=Drosophila melanogaster GN=hk PE=1 SV=2	2.66667		NM_079697	RpS20	12.1331
Q9NFU0	Fragile X mental retardation syndrome-related protein 1 OS=Drosophila melanogaster GN=Fmr1 PE=1 SV=1	2		NM_001259837	Toll-6	9.78592
Q9VU02	Probable small nuclear ribonucleoprotein Sm D1 OS=Drosophila melanogaster GN=SmD1 PE=1 SV=1	1.33333		NR_073996	lncRNA:CR44230	4.42346
Q9NFU0-3	Isoform E of Fragile X mental retardation syndrome-related protein 1 OS=Drosophila melanogaster GN=Fmr1	2		NM_167633	bnb	2.87404
Q9NFU0-2	Isoform C of Fragile X mental retardation syndrome-related protein 1 OS=Drosophila melanogaster GN=Fmr1	2		NM_134772	CG31937	9.9699
B3LF78	Fmr1, isoform F OS=Drosophila melanogaster GN=Fmr1 PE=2 SV=1	2		NM_136818	CG9067	11.0891
Q8IPB7	CG6206, isoform B OS=Drosophila melanogaster GN=CG6206 PE=1 SV=1	2.33333		NM_206213	Slik	5.87254
Q9XZ53	Oligosaccharyl transferase 3 OS=Drosophila melanogaster GN=OstStt3 PE=1 SV=1	1.33333		NM_139387	RabX5	6.52487
Q9VK18	CG16812 OS=Drosophila melanogaster GN=CG16812 PE=1 SV=1	2.33333		NM_139779	CG7386	7.28781
Q9VB23	BcDNA.LD34343 OS=Drosophila melanogaster GN=wdb PE=1 SV=2	2.66667		NM_001169923	bol	7.82379
Q7K0E3	Mps one binder kinase activator-like 4 OS=Drosophila melanogaster GN=Mob4 PE=1 SV=1	2.33333		NM_130655	eIF3g1	11.938
Q9VMX2	LD03394p OS=Drosophila melanogaster GN=l(2)05714 PE=1 SV=3	2		NM_001169363	sv	2.99844
Q9VZP5	eIF5B OS=Drosophila melanogaster GN=eIF5B PE=2 SV=2	2		NM_165902	Tmem18	9.79728
B7Z0A9	Sosondowah, isoform H OS=Drosophila melanogaster GN=sowah PE=4 SV=2	2.33333		NM_001275142	trc	8.66037
B7Z0B0	Sosondowah, isoform G OS=Drosophila melanogaster GN=sowah PE=4 SV=2	2.33333		NM_078754	eIF3i	12.5789
Q8IPA6	CG33695, isoform D OS=Drosophila melanogaster GN=CG32955 PE=2 SV=1	2.33333		NM_135375	CG17294	11.9249
Q8IPA7	CG33695, isoform C OS=Drosophila melanogaster GN=CG32955 PE=2 SV=1	2.33333		NM_143237	Tb	4.64898
Q8IPL4	Lethal (2) 05714, isoform B OS=Drosophila melanogaster GN=l(2)05714 PE=1 SV=1	2		NM_079302	TfIIEalpha	9.80368
Q5U0X8	CG12325 OS=Drosophila melanogaster GN=CG12325 PE=1 SV=1	1.33333		NM_137657	CG11110	9.89655
P40320	S-adenosylmethionine synthase OS=Drosophila melanogaster GN=Sam-S PE=2 SV=2	2.33333		NM_001104314	CCHa1	4.41723
Q7K1Q7	CG1381 OS=Drosophila melanogaster GN=RpLP0-like PE=2 SV=1	2.33333		NM_079248	Prim1	5.52917
Q7JRJ9	Inner centromere protein OS=Drosophila melanogaster GN=Incenp PE=1 SV=1	2		NM_141970	CG12279	9.0965
Q7JRC9	CG30496 OS=Drosophila melanogaster GN=CG30493;CG30496;l(2)08492 PE=2 SV=1	2		NR_048472	lncRNA:CR31451	12.914
Q960W9	LD31582p OS=Drosophila melanogaster GN=sowah PE=1 SV=1	2.33333		NM_206636	CG34417	2.64235
Q9VSH4	Cleavage and polyadenylation specificity factor subunit CG7185 OS=Drosophila melanogaster GN=CG7185 PE=1 SV=2	2		NM_001258702	rudhira	9.43056
Q7KM15	Beta NAC homolog OS=Drosophila melanogaster GN=bic PE=1 SV=1	1.33333		NM_139404	mRpL46	10.8613
Q9VZE6	Ribosome biogenesis protein BRX1 homolog OS=Drosophila melanogaster GN=CG11583 PE=2 SV=2	1.33333		NM_142087	CG31326	7.7422
Q9VI18	CG1024 OS=Drosophila melanogaster GN=CG1024 PE=1 SV=4	1.33333		NM_169764	Sgs5bis	5.52724
Q86LC7	Deformed epidermal autoregulatory factor-1, isoform B OS=Drosophila melanogaster GN=Deaf1 PE=2 SV=1	2		NM_143282	CG5880	9.45264
Q9I7H8	CG18766, isoform A OS=Drosophila melanogaster GN=CG18766 PE=1 SV=2	2		NR_124745	lncRNA:CR44514	7.26978
Q9VAF3	CG7824, isoform A OS=Drosophila melanogaster GN=CG7824 PE=1 SV=1	1.33333		NM_137242	Got1	4.62876
Q27896	TBP-related factor OS=Drosophila melanogaster GN=Trf PE=2 SV=1	1.33333		NM_145336	BomS4	2.99169
Q95RU8	G9a OS=Drosophila melanogaster GN=G9a PE=1 SV=1	1.33333		NM_137696	CG15653	7.94666
Q24180	Deformed epidermal autoregulatory factor 1 OS=Drosophila melanogaster GN=Deaf1 PE=1 SV=1	2		NM_140580	IleRS-m	8.41647
Q9VS25	Cornetto, isoform B OS=Drosophila melanogaster GN=corn PE=1 SV=2	1.33333		NM_058161	Sce	9.7241
Q8T051	CG31365 OS=Drosophila melanogaster GN=CG31365 PE=1 SV=1	1.33333		NM_132079	wuho	10.919
Q8IQ73	Cornetto, isoform C OS=Drosophila melanogaster GN=corn PE=2 SV=2	1.33333		NM_001272479	Neb-cGP	3.97434
Q9W179	Sterile20-like kinase, isoform B OS=Drosophila melanogaster GN=slik PE=1 SV=2	1.33333		NM_132633	CG4332	8.33595
Q2PDZ3	CG6664, isoform D OS=Drosophila melanogaster GN=CG6664 PE=2 SV=1	1.33333		NM_134893	alpha4GT1	12.0221
Q9W3U9	CG14434 OS=Drosophila melanogaster GN=CG14434 PE=2 SV=1	1.33333		NM_079110	PHDP	5.47705
Q9W4M8	Dim gamma-tubulin 4 OS=Drosophila melanogaster GN=dgt4 PE=1 SV=1	1.33333		NM_135838	CG7916	4.87121
P15007-2	Isoform A of Enolase OS=Drosophila melanogaster GN=Eno	1.33333		NM_137095	RpS23	4.21913
Q9VVI1	CG7564 OS=Drosophila melanogaster GN=CG7564 PE=1 SV=1	1.33333		NM_001201593	DAAM	4.07971
Q9VVC8	CG6664, isoform A OS=Drosophila melanogaster GN=CG6664 PE=1 SV=1	1.33333		NM_001298124	mgl	8.81551
P39769	Polyhomeotic-proximal chromatin protein OS=Drosophila melanogaster GN=ph-p PE=1 SV=2	1.33333		NM_001042882	CG34134	7.97086
Q9VZU3	FI07618p OS=Drosophila melanogaster GN=pfk PE=1 SV=2	1.33333		NM_165623	CG30356	3.98052
P15007	Enolase OS=Drosophila melanogaster GN=Eno PE=1 SV=2	1.33333		NM_001299755	CG18870	3.80374
B7YZQ1	Sterile20-like kinase, isoform F OS=Drosophila melanogaster GN=slik PE=4 SV=1	1.33333		NM_001273746	nrv3	10.5364
Q8MLP1	Sterile20-like kinase, isoform A OS=Drosophila melanogaster GN=slik PE=2 SV=1	1.33333		NM_001259816	endos	4.37152
E1JHR5	Enolase OS=Drosophila melanogaster GN=Eno PE=3 SV=1	1.33333		NM_140458	CG17177	2.36162
Q59E61	Sterile20-like kinase, isoform E OS=Drosophila melanogaster GN=slik PE=4 SV=1	1.33333		NM_079892	Arf102F	8.58625
Q9VGZ8	Slender lobes-like protein OS=Drosophila melanogaster GN=CG12592 PE=1 SV=3	1.33333		NM_135518	CG5676	12.7621
Q9VF83	CG31301 OS=Drosophila melanogaster GN=CG12258 PE=2 SV=2	1.33333		NR_073787	lncRNA:CR43825	4.7669
P54399	Protein disulfide-isomerase OS=Drosophila melanogaster GN=Pdi PE=2 SV=1	1.33333		NM_142836	HP1c	10.3748
Q86BP7	Piefke, isoform B OS=Drosophila melanogaster GN=pfk PE=2 SV=1	1.33333		NM_142920	Rpn9	5.31292
Q9VQQ9	Exocyst complex component 2 OS=Drosophila melanogaster GN=sec5 PE=1 SV=1	11		NM_001104521	CG1638	6.06583
Q9VW22	Lethal (3) 76BDm OS=Drosophila melanogaster GN=l(3)76BDm PE=1 SV=2	16.3333		NM_001297850	Ns3	2.62381
O02193	Males-absent on the first protein OS=Drosophila melanogaster GN=mof PE=1 SV=1	8.33333		NM_132494	Uba5	9.84959
Q9W261	RNA polymerase-associated protein Rtf1 OS=Drosophila melanogaster GN=Rtf1 PE=1 SV=1	8.33333		NM_001032399	eys	10.8416
Q9VCN6	Cdc16 OS=Drosophila melanogaster GN=cdc16 PE=2 SV=1	8.66667		NM_137230	Ufc1	10.6133
Q9VTV1	THO complex subunit 6 OS=Drosophila melanogaster GN=thoc6 PE=1 SV=1	5.33333		NM_001300002	CG10866	5.42926
Q9VND8	GTP-binding protein Rheb homolog OS=Drosophila melanogaster GN=Rheb PE=2 SV=1	6.33333		NM_001273681	sick	3.71038
Q9VB52	LD05287p OS=Drosophila melanogaster GN=l(3)mbt PE=1 SV=1	6		NR_124247	lncRNA:CR44727	5.16039
Q9VID9	CG8677 OS=Drosophila melanogaster GN=CG8677 PE=2 SV=2	5		NM_057458	Hrb87F	3.33184
P45975	Histone-lysine N-methyltransferase Su(var)3-9 OS=Drosophila melanogaster GN=Su(var)3-9 PE=1 SV=2	7.33333		NM_142924	SdhD	13.811
Q7KW02	Enhanced adult sensory threshold OS=Drosophila melanogaster GN=east PE=2 SV=1	7		NM_141885	Ect3	9.37265
Q9VM63	Gas41 OS=Drosophila melanogaster GN=Gas41 PE=1 SV=2	5		NM_078781	Obp28a	3.44057
O18404	3-hydroxyacyl-CoA dehydrogenase type-2 OS=Drosophila melanogaster GN=scu PE=1 SV=1	5.66667		NM_057612	CycE	2.46805
Q9W5R5	CG17494, isoform A OS=Drosophila melanogaster GN=CG17494 PE=1 SV=2	5		NM_136834	CG13204	7.55686
Q0E8L9	CG17494, isoform B (Fragment) OS=Drosophila melanogaster GN=CG17494-RB PE=1 SV=1	5		NM_137793	CG13502	5.29768
Q7PL71	CG17494, isoform C OS=Drosophila melanogaster GN=CG17494 PE=4 SV=1	5		NM_138216	CG42553	9.35253
P80455	40S ribosomal protein S12 OS=Drosophila melanogaster GN=RpS12 PE=2 SV=2	9.66667		NR_124832	lncRNA:CR45409	7.84447
Q24179-3	Isoform E of Protein sly1 homolog OS=Drosophila melanogaster GN=Slh	3.33333		NM_140543	Pgant8	7.5634
Q24179	Protein sly1 homolog OS=Drosophila melanogaster GN=Slh PE=2 SV=3	3.33333		NM_170188	Ythdf	3.66532
Q8INB9-2	Isoform A of RAC serine/threonine-protein kinase OS=Drosophila melanogaster GN=Akt1	3.66667		NM_141333	PSMG1	10.4003
Q8INB9	RAC serine/threonine-protein kinase OS=Drosophila melanogaster GN=Akt1 PE=1 SV=3	3.66667		NM_135361	Mettl14	7.77873
P20240	Otefin OS=Drosophila melanogaster GN=Ote PE=1 SV=2	6.33333		NR_073646	asRNA:CR43959	8.55655
Q9VFQ9	Dipeptidase B, isoform A OS=Drosophila melanogaster GN=Dip-B PE=1 SV=2	3.66667		NM_164711	nrv2	2.39958
Q9Y0I1	NuA4 complex subunit EAF3 homolog OS=Drosophila melanogaster GN=MRG15 PE=1 SV=1	5.33333		NM_135432	CG13108	12.3267
P02283	Histone H2B OS=Drosophila melanogaster GN=His2B PE=1 SV=2	5		NM_001103801	CG9003	7.48277
Q8SX60	CG30193, isoform D OS=Drosophila melanogaster GN=CG30193 PE=2 SV=1	2		NM_137961	levy	7.84593
Q7JRH2	CG30193, isoform A OS=Drosophila melanogaster GN=CG30190;CG30193 PE=1 SV=1	2		NM_079648	Rbf2	5.79588
A1Z9E2-2	Isoform 2 of Protein lin-54 homolog OS=Drosophila melanogaster GN=mip120	10.6667		NM_001363934		4.20459
E1JIM1	CG4699, isoform J OS=Drosophila melanogaster GN=wah PE=4 SV=1	3.66667		NM_001273385	CG44153	5.95532
Q9VV74	LD23602p OS=Drosophila melanogaster GN=Smn PE=1 SV=1	3		NM_135775	CG16812	8.93037
P22058	Chromosomal protein D1 OS=Drosophila melanogaster GN=D1 PE=1 SV=3	2		NM_166047	Shrm	4.17785
A4V2K7	D1 chromosomal protein, isoform C OS=Drosophila melanogaster GN=D1 PE=4 SV=1	2		NM_166787	myo	5.06684
Q9W039	CG9018, isoform A OS=Drosophila melanogaster GN=CG9018 PE=2 SV=1	2		NM_001258717	fne	10.2098
Q8SX50	CG9018, isoform B OS=Drosophila melanogaster GN=CG9018 PE=2 SV=1	2		NM_080051	ru	6.8365
E1JIM0	CG4699, isoform E OS=Drosophila melanogaster GN=wah PE=4 SV=1	4.33333		NM_141165	CG13239	10.7603
Q0KI68	CG4699, isoform F OS=Drosophila melanogaster GN=wah PE=1 SV=2	4.33333		NM_170411	CG2310	2.41802
A4V2Z1	CG4699, isoform D OS=Drosophila melanogaster GN=wah PE=4 SV=1	4.33333		NM_135746	Pih1D1	9.88042
P55828	40S ribosomal protein S20 OS=Drosophila melanogaster GN=RpS20 PE=1 SV=1	7		NM_001299360	CG11883	11.8393
Q94513	Boundary element associated factor OS=Drosophila melanogaster GN=BEAF-32 PE=1 SV=1	3		NM_170572	CG1910	2.53889
Q9VX34	CG5800 OS=Drosophila melanogaster GN=CG5800 PE=1 SV=2	3		NM_131982	CG3323	4.54475
O76927	40S ribosomal protein S21 OS=Drosophila melanogaster GN=oho23B PE=1 SV=1	5		NM_079056	Mapmodulin	7.98336
O76927-2	Isoform E of 40S ribosomal protein S21 OS=Drosophila melanogaster GN=oho23B	5		NM_206374	CrebA	7.20313
Q9VHG1	RE66051p OS=Drosophila melanogaster GN=Vps16A PE=2 SV=1	11.6667		NM_080255	tara	5.12332
Q7KS15	Ubiquitin carboxyl-terminal hydrolase OS=Drosophila melanogaster GN=CG5794 PE=1 SV=1	10		NM_001300435	CG10311	6.63071
Q95TN1	UPF0533 protein CG4953 OS=Drosophila melanogaster GN=CG4953 PE=2 SV=1	7		NM_001274028	CG6191	7.73395
Q59E68	Lethal (1) G0232, isoform F OS=Drosophila melanogaster GN=l(1)G0232 PE=4 SV=1	6		NM_132144	CG3040	11.3817
Q9VDE6	Exocyst complex component 6 OS=Drosophila melanogaster GN=sec15 PE=1 SV=1	8.33333		NM_001272816	RunxB	8.6387
Q9W517	Protein wings apart-like OS=Drosophila melanogaster GN=wapl PE=1 SV=1	5.33333		NM_001273197	PDZ-GEF	8.97807
Q9W517-2	Isoform B of Protein wings apart-like OS=Drosophila melanogaster GN=wapl	5.33333		NM_001273411	da	5.22794
O44434	QKR58E-3 OS=Drosophila melanogaster GN=qkr58E-3 PE=2 SV=1	5.33333		NM_136000	GCS2beta	7.1353
Q9VE34-2	Isoform B of Ectopic P granules protein 5 homolog OS=Drosophila melanogaster GN=CG14299	6.33333		NM_001273805	Eb1	10.3227
P56175	Probable RNA 3'-terminal phosphate cyclase-like protein OS=Drosophila melanogaster GN=Rtc1 PE=2 SV=3	3.66667		NM_001169993	CG42495	9.33142
Q8IRM6	Lethal (1) G0232, isoform D OS=Drosophila melanogaster GN=l(1)G0232 PE=2 SV=1	4.66667		NM_139979	GstO2	9.74568
E1JHY7	Pop2, isoform D OS=Drosophila melanogaster GN=Pop2 PE=4 SV=1	6.33333		NM_144382	CG3021	9.90949
Q9VH01	BIR-containing ubiquitin-conjugating enzyme OS=Drosophila melanogaster GN=Bruce PE=1 SV=3	7.33333		NM_167348	CG32638	11.04
Q9VW97	Possible lysine-specific histone demethylase 1 OS=Drosophila melanogaster GN=Su(var)3-3 PE=1 SV=1	7		NM_079289	I-2	8.97001
B7Z0G7	Suppressor of variegation 3-3, isoform B OS=Drosophila melanogaster GN=Su(var)3-3 PE=4 SV=1	7		NM_143794	l(3)05822	9.11131
Q9VGJ9	Heme oxygenase OS=Drosophila melanogaster GN=Ho PE=2 SV=1	4		NM_139579	Sc2	11.6673
Q9VT33	Ribose-phosphate pyrophosphokinase OS=Drosophila melanogaster GN=CG6767 PE=2 SV=3	4.66667		NM_141556	CG9773	10.6791
E1JHA1	Kruppel homolog 2, isoform B OS=Drosophila melanogaster GN=Kr-h2 PE=4 SV=1	4.66667		NM_001169253	Drak	6.54535
Q9VHX2	CG3223 OS=Drosophila melanogaster GN=CG3223 PE=2 SV=1	5.33333		NM_001272842	bbx	3.88094
Q9VH81	GH12714p OS=Drosophila melanogaster GN=PpD3 PE=2 SV=1	5.66667		NM_164693	eya	2.94183
Q9V447	Protein Kr-h2 OS=Drosophila melanogaster GN=Kr-h2 PE=1 SV=1	4.66667		NM_136611	Mys45A	9.30346
Q7K4B4	Dim gamma-tubulin 5 OS=Drosophila melanogaster GN=dgt5 PE=2 SV=1	4.66667		NM_137399	P32	11.0664
Q9VNS0	Protein maelstrom OS=Drosophila melanogaster GN=mael PE=1 SV=1	5		NM_140340	Hip1	5.49684
Q9VFX6	CG8449 OS=Drosophila melanogaster GN=CG8449 PE=1 SV=1	5		NM_001104163	CG34250	8.9706
Q9W3G1	CG10555 OS=Drosophila melanogaster GN=CG10555 PE=2 SV=1	4		NM_001104255	Dh44	14.5831
Q9VZE4	CG1316 OS=Drosophila melanogaster GN=CG1316 PE=1 SV=2	4.66667		NM_169325	Fmr1	3.22678
Q9VSM8	CG5978 OS=Drosophila melanogaster GN=GAPsec PE=2 SV=1	5.66667		NM_141800	Dph3	8.76627
Q9VRE0	CG1518 OS=Drosophila melanogaster GN=CG1518 PE=2 SV=1	5		NM_144455	CG18764	8.98465
Q9I7F7	Tyrosine-protein kinase PR2 OS=Drosophila melanogaster GN=PR2 PE=1 SV=3	5		NM_001043246	Gyc88E	8.60289
Q9VN42	Dorsal interacting protein 2 OS=Drosophila melanogaster GN=Dip2 PE=2 SV=2	4.33333		NM_001273504	CG43925	6.25641
Q9W1Y8	CG13531 OS=Drosophila melanogaster GN=CG13531 PE=2 SV=1	5.66667		NM_001297931	norpA	3.91132
Q8I8V0	Transcriptional adapter 2B OS=Drosophila melanogaster GN=Ada2b PE=1 SV=1	4.66667		NM_001298403	para	13.4582
Q9VQL9	Serine/threonine-protein phosphatase OS=Drosophila melanogaster GN=PpD6 PE=2 SV=1	3.66667		NM_135278	CG6055	6.04223
Q9VRV7	Pre-mRNA branch site p14-like protein OS=Drosophila melanogaster GN=CG13298 PE=1 SV=1	2.66667		NM_001273767	cta	8.28348
Q9VSS1	Pixie, isoform A OS=Drosophila melanogaster GN=pix PE=1 SV=1	4.33333		NM_167990	BtbVII	2.70924
Q9I7I0	G2/mitotic-specific cyclin-B3 OS=Drosophila melanogaster GN=CycB3 PE=1 SV=1	4.33333		NR_124969	lncRNA:CR44565	5.90965
Q9VC10	CG31120, isoform B OS=Drosophila melanogaster GN=CG13644 PE=1 SV=2	4.33333		NM_137248	CG8435	8.52036
O96838	Putative 1-phosphatidylinositol-3-phosphate 5-kinase OS=Drosophila melanogaster GN=fab1 PE=1 SV=2	4		NM_166639	SERCA	11.7673
A1ZBF1	CG18190 OS=Drosophila melanogaster GN=CG18190 PE=4 SV=2	4		NR_125119	lncRNA:CR43130	5.90258
Q9VPQ2	CG4164 OS=Drosophila melanogaster GN=CG4164 PE=1 SV=1	3		NM_001104342	CG6006	4.53953
Q9VS98	CG7492 OS=Drosophila melanogaster GN=CG7492 PE=1 SV=1	3.66667		NM_001273632	AsnRS	5.09458
Q5LJN2	Serine/threonine-protein phosphatase OS=Drosophila melanogaster GN=Pp1-Y2 PE=3 SV=2	3.33333		NM_134616	tilB	3.83593
O18645	EG:132E8.2 protein OS=Drosophila melanogaster GN=SNF1A PE=1 SV=1	4.66667		NM_136375	sced	8.71234
Q9W424	RE50839p OS=Drosophila melanogaster GN=Spx PE=1 SV=1	2.66667		NR_003797	snoRNA:Me28S-U1848	2.58523
Q9XZT1	Mediator of RNA polymerase II transcription subunit 18 OS=Drosophila melanogaster GN=MED18 PE=1 SV=1	2.33333		NM_143386	Nepl18	8.50906
Q8T4E1	Putative GPI-anchor transamidase OS=Drosophila melanogaster GN=CG4406 PE=2 SV=1	3.33333		NM_137072	DJ-1alpha	5.64806
P12370	cAMP-dependent protein kinase catalytic subunit OS=Drosophila melanogaster GN=Pka-C1 PE=1 SV=3	3.66667		NM_140983	mTerf3	9.55061
Q9V3N6	GH02822p OS=Drosophila melanogaster GN=TM9SF4 PE=1 SV=1	3		NM_078820	hgo	6.94931
Q9VMN5	60 kDa heat shock protein homolog 2, mitochondrial OS=Drosophila melanogaster GN=Hsp60C PE=2 SV=2	3.66667		NM_139557	Ids	7.279
Q05652	Serine/threonine-protein kinase pelle OS=Drosophila melanogaster GN=pll PE=1 SV=1	4.33333		NM_001043243	l(3)neo38	9.51483
B7Z073	SOSS complex subunit C homolog OS=Drosophila melanogaster GN=CG42374 PE=3 SV=1	4.33333		NM_139728	Ppat-Dpck	6.93407
E1JGV3	G protein salpha 60A, isoform D OS=Drosophila melanogaster GN=G-salpha60A PE=4 SV=1	4.66667		NM_057507	GluRIA	13.0794
Q8IQP1	RE70427p OS=Drosophila melanogaster GN=zetaCOP PE=2 SV=1	2.66667		NM_137035	mip120	5.45888
P20354	Guanine nucleotide-binding protein G(s) subunit alpha OS=Drosophila melanogaster GN=G-salpha60A PE=2 SV=1	4.66667		NM_143496	Vps13B	6.99507
Q9NHV9-2	Isoform B of Protein vav OS=Drosophila melanogaster GN=vav	4.66667		NM_001299534	CG30466	3.98322
P20354-2	Isoform A of Guanine nucleotide-binding protein G(s) subunit alpha OS=Drosophila melanogaster GN=G-salpha60A	4.66667		NM_001258639	Rab39	9.22348
Q9VRG8	CG1486, isoform A OS=Drosophila melanogaster GN=CG1486 PE=1 SV=1	2.66667		NM_078598	mRpS25	11.3657
B7YZV6	Scm-related gene containing four mbt domains, isoform C OS=Drosophila melanogaster GN=Sfmbt PE=4 SV=1	3.66667		NM_001259242	Dscam1	2.87681
Q8MZ22	CG32243 OS=Drosophila melanogaster GN=CG32243 PE=2 SV=1	3		NM_166422	Treh	3.80493
Q9VK33	Polycomb protein Sfmbt OS=Drosophila melanogaster GN=Sfmbt PE=1 SV=2	3.66667		NM_140325	vih	11.8431
Q05856	Small nuclear ribonucleoprotein-associated protein B OS=Drosophila melanogaster GN=SmB PE=1 SV=1	2		NM_136057	Jwa	12.1744
Q9VBP9-2	Isoform B of Nuclear protein localization protein 4 homolog OS=Drosophila melanogaster GN=CG4673	2.66667		NM_168865	BNIP3	2.73555
E1JIX5	CG4673, isoform D OS=Drosophila melanogaster GN=CG4673 PE=4 SV=1	2.66667		NM_001170145	CG42542	7.94002
Q9VHI4	Probable splicing factor 3B subunit 5 OS=Drosophila melanogaster GN=CG11985 PE=1 SV=1	2.66667		NM_079676	P5cr	12.132
Q9VK47	AT09773p OS=Drosophila melanogaster GN=Vha68-3 PE=1 SV=1	3		NM_136225	CG9336	8.42361
Q32KD2	Histone-lysine N-methyltransferase eggless OS=Drosophila melanogaster GN=egg PE=1 SV=1	4.33333		NM_001144669	svr	6.25985
Q9VBP9	Nuclear protein localization protein 4 homolog OS=Drosophila melanogaster GN=CG4673 PE=1 SV=3	2.66667		NM_132276	CG1789	10.1559
Q9VK33-2	Isoform A of Polycomb protein Sfmbt OS=Drosophila melanogaster GN=Sfmbt	3.33333		NM_001042936	CG40006	8.3282
A1ZBU8	CG18067 OS=Drosophila melanogaster GN=CG18067 PE=4 SV=1	3		NM_135293	CG13794	3.97471
O77434	EG:34F3.8 protein OS=Drosophila melanogaster GN=Sec22 PE=1 SV=2	2		NM_001273391	Cdk5alpha	5.07324
Q9I7P7	CG7139, isoform B OS=Drosophila melanogaster GN=CG7139 PE=2 SV=1	4		NM_139980	GstO1	7.88411
Q9VLT7	IP17351p OS=Drosophila melanogaster GN=RpL36A PE=1 SV=2	3.33333		NM_145193	AIMP3	12.312
P34021-2	Isoform ECR-A of Ecdysone receptor OS=Drosophila melanogaster GN=EcR	2.33333		NM_139380	CG13919	9.50612
P34021-3	Isoform ECR-B2 of Ecdysone receptor OS=Drosophila melanogaster GN=EcR	2.33333		NM_001299083	Lrch	7.78109
Q9VT01	FI06792p OS=Drosophila melanogaster GN=pall PE=1 SV=1	3		NM_079079	Acox57D-d	5.11469
Q9VU14	Autophagy-specific gene 1, isoform A OS=Drosophila melanogaster GN=Atg1 PE=2 SV=1	3.66667		NM_001274994	Zn72D	6.68113
Q9VVX0	CG10419 OS=Drosophila melanogaster GN=Gem2 PE=1 SV=1	2		NM_138561	otk2	5.43853
E1JIX6	CG4673, isoform C OS=Drosophila melanogaster GN=CG4673 PE=4 SV=1	2		NM_078912	Tsp42Ej	15.5745
Q8MQJ7	Autophagy-specific gene 1, isoform B OS=Drosophila melanogaster GN=Atg1 PE=1 SV=1	3.66667		NM_136420	Gadd45	9.88163
E1JGY2	Ecdysone receptor, isoform G OS=Drosophila melanogaster GN=EcR PE=3 SV=1	2.33333		NM_136432	CG11123	8.59264
A4UZ51	Ecdysone receptor, isoform E OS=Drosophila melanogaster GN=EcR PE=3 SV=1	2.33333		NM_165597	pnut	6.73556
Q9VD81	DNA-directed RNA polymerase subunit OS=Drosophila melanogaster GN=RpI12 PE=1 SV=1	3		NM_001104079	GAPcenA	10.7423
P34021	Ecdysone receptor OS=Drosophila melanogaster GN=EcR PE=1 SV=1	2.33333		NM_079391	Prosbeta6	11.3721
Q24492	Replication protein A 70 kDa DNA-binding subunit OS=Drosophila melanogaster GN=RpA-70 PE=1 SV=1	3.33333		NM_001038962	Dpm3	9.86224
P40946	ADP-ribosylation factor 3 OS=Drosophila melanogaster GN=Arf51F PE=2 SV=3	2		NM_142308	CG10340	13.1392
Q9VEN3	Germinal centre kinase III OS=Drosophila melanogaster GN=GckIII PE=1 SV=1	2.66667		NM_001144631	CG31145	5.59588
P56538	Eukaryotic translation initiation factor 6 OS=Drosophila melanogaster GN=eIF6 PE=2 SV=3	1.66667		NM_143508	ZIPIC	9.2646
Q9Y153	BcDNA.GH03377 OS=Drosophila melanogaster GN=BcDNA.GH03377 PE=1 SV=1	3.33333		NM_001300167	Oatp74D	8.15317
Q9VQX6	CG3702 OS=Drosophila melanogaster GN=CG3702 PE=2 SV=2	3.33333		NM_001299465	CG6329	5.30565
Q9VU87	Vacuolar protein-sorting-associated protein 36 OS=Drosophila melanogaster GN=Vps36 PE=2 SV=2	3.33333		NR_002692	lncRNA:CR33963	7.37293
Q9V3Z3	LD26007p OS=Drosophila melanogaster GN=meso18E PE=1 SV=1	2.33333		NR_124728	lncRNA:CR44811	2.37397
Q961D1	Cyclin K, isoform A OS=Drosophila melanogaster GN=CycK PE=1 SV=1	2		NM_136529	boly	3.70627
Q9Y149	Mediator of RNA polymerase II transcription subunit 15 OS=Drosophila melanogaster GN=MED15 PE=2 SV=1	3.66667		NM_137109	CG8613	13.0143
Q9VN31	Fip1 OS=Drosophila melanogaster GN=Fip1 PE=1 SV=1	1		NM_001275816	CG4562	8.52034
Q9VQN8	Fidgetin-like protein 1 OS=Drosophila melanogaster GN=CG3326 PE=2 SV=2	2.66667		NM_078601	rut	3.83248
P50536-2	Isoform B of Protein male-specific lethal-3 OS=Drosophila melanogaster GN=msl-3	3		NM_136056	CG10343	10.3499
P50536	Protein male-specific lethal-3 OS=Drosophila melanogaster GN=msl-3 PE=1 SV=2	3		NM_143344	Gp93	11.4647
Q0KHX7	CG13366, isoform B OS=Drosophila melanogaster GN=CG13366 PE=4 SV=1	2.66667		NM_135015	CG15629	5.43272
C1C560	MIP02960p OS=Drosophila melanogaster GN=RhoGAP1A PE=2 SV=1	3		NM_135522	CG4957	9.74056
Q9VK31	CG5439 OS=Drosophila melanogaster GN=CG5439 PE=2 SV=1	3		NM_137141	ND-B15	12.7339
Q9VAT2	DDB1- and CUL4-associated factor 10 homolog OS=Drosophila melanogaster GN=CG1523 PE=1 SV=1	3		NM_139639	CG11342	6.33056
Q9VM57	Septin interacting protein 2, isoform A OS=Drosophila melanogaster GN=sip2 PE=1 SV=2	2.66667		NM_079980	ND-23	13.2052
Q9XZ22	CG3679 OS=Drosophila melanogaster GN=CG3679 PE=1 SV=1	2.33333		NM_132573	CG42258	7.65262
Q9VQJ6	CG9641, isoform A OS=Drosophila melanogaster GN=CG9641 PE=1 SV=1	1.66667		NM_001273577	her	5.65999
Q9W0P5	Probable UDP-glucose 4-epimerase OS=Drosophila melanogaster GN=CG12030 PE=1 SV=1	2		NM_001297990	CG32756	4.72288
Q9W3W6	CG14438, isoform A OS=Drosophila melanogaster GN=CG14438 PE=1 SV=2	3		NM_164644	CG31648	9.9295
Q9VTW6	CG10418 OS=Drosophila melanogaster GN=CG10418 PE=1 SV=1	2		NM_164476	Rab5	4.1305
P55162	Membrane-associated protein Hem OS=Drosophila melanogaster GN=Hem PE=2 SV=1	2.33333		NM_058143	fs(1)K10	8.84866
[truncated: 32,452 more rows]
