# Supplementary material for: Orai-mediated calcium entry determines activity of central dopaminergic neurons by regulation of gene expression
Source: eLife. 2024 Jan 30;12:RP88808. doi: 10.7554/eLife.88808 (PMC10945566; doi:10.7554/eLife.88808)
Supplement: Figure 5—figure supplement 3—source data 1. [file elife-88808-fig5-figsupp3-data1.xlsx]

## Sheet: Sheet1
CS	THD'GAL4/+	Ala/+	THD'>Ala	CamKII_RNAi_1/+	THD'>CamKII_RNAi_1	CamKII_RNAi_2/+	THD'>CamKII_RNAi_2
900	87	111	0	102	120	111	17
104	105	115	13	460	130	146	22
214	214	96	5	320	131	147	28
238	238	120	10	344	145	164	49
733	733	650	13	133	155	156	55
676	676	333	15	611	171	780	7
737	737	340	20	455	373	490	14
900	900	311	58	179	396	456	34
172	172	256	59	189	460	555	84
235	235	115	35	900	81	233	189
492	492	168	73	120	627	277	131
501	501	413	0	900	900	328	70
735	735	610	0	465	0	269	78
900	900	560	87	146	1	367	188
277	277	465	95	211	0	470	197
303	303	187	102	246	23	366	201
408	408	196	48	277	30	487	5
415	415	116	108	289	39	490	34
395	395	167	129	290	11	511	37
572	572	246	157	900	15	560	48
540	540	255	170	650	22	390	59
575	575	900	3	740	27	299	77
584	584	900	8	811	33	611	204
596	596	465	13	640	67	637	213
65	65	900	14	900	114	745	27
95	95		29		137	900	87
113	113		45		162		162
150	150		55		180		221
174	174		58		413		261
204	204		121		348		294
526	526		27
655	655		32
900	900		35
900	900		40
289	289		49
303	303		70
404	404		89
510	510
900	900
203	203
293	293
327	327
438	438
442	442
495	495
900	900
810
650
900
609
759
