# Supplementary material for: Orai-mediated calcium entry determines activity of central dopaminergic neurons by regulation of gene expression
Source: eLife. 2024 Jan 30;12:RP88808. doi: 10.7554/eLife.88808 (PMC10945566; doi:10.7554/eLife.88808)
Supplement: Figure 5—figure supplement 4—source data 1. [file elife-88808-fig5-figsupp4-data1.xlsx]

## Sheet: Sheet1
CS	THD'GAL4/+	E180A/+	THD'>E180A	THD'>E180A; CamKIIWT	THD'>E180A; CamKIIT287D	THD'>E180A; CamKIIT287A
900	87	509	0	3	0	8
104	105	268	0	0	28	9
214	214	381	0	0	8	0
238	238	396	0	4	23	0
733	733	674	0	0	22	0
676	676	731	0	0	41	0
737	737	374	0	0	53	0
900	900	353	0	2	110	0
172	172	184	0	0	137	3
235	235	227	0	3	165	0
492	492	540	0	8	5	0
501	501	345	0	0	53	0
735	735	357	0	0	58	0
900	900	374	0	0	117	0
277	277	520	0	7	144	0
303	303	900	0	0	266	0
408	408	100	0	0	287	0
415	415	169	0	2	367	0
395	395	267	0	0	32	0
572	572	283	0	0	89	0
540	540	294	0	5	14	0
575	575	471	0	0	18	0
584	584	782	0	0	32	0
596	596	641	0	0	36	0
65	65	900			47
95	95	900			101
113	113	247			152
150	150	234			11
174	174	258			22
204	204	351			48
526	526	471			64
655	655	611			61
900	900	900			67
900	900	900			43
289	289
303	303
404	404
510	510
900	900
203	203
293	293
327	327
438	438
442	442
495	495
900	900
810
650
900
609
759
