# Supplementary material for: Orai-mediated calcium entry determines activity of central dopaminergic neurons by regulation of gene expression
Source: eLife. 2024 Jan 30;12:RP88808. doi: 10.7554/eLife.88808 (PMC10945566; doi:10.7554/eLife.88808)
Supplement: Figure 6—source data 1. [file elife-88808-fig6-data1.xlsx]

## Sheet: Panel B
Time	WT-1	WT-2	WT-3	WT-4	WT-5	WT-6	WT-7	WT-8	WT-9	WT-10	WT-11	WT-12	WT-13	WT-14	WT-15	WT-16	WT-17	WT-18	WT-19	WT-20	WT-21	WT-22	WT-23		E180A-1	E180A-2	E180A-3	E180A-4	E180A-5	E180A-6	E180A-7	E180A-8	E180A-9	E180A-10	E180A-11	E180A-12	E180A-13	E180A-14	E180A-15	E180A-16	E180A-17	E180A-18	E180A-19	E180A-20	E180A-21	E180A-22	E180A-23	E180A-24	E180A-25
1	0.0781488	-0.0282788	0.0429872	-0.035244	0.0429872	-0.035244	-0.00534291	0.0781488	-0.0424609	-0.0291578	-0.0698117	0.0781488	-0.0250502	-0.0621321	-0.0727935	0.0696437	-0.0621941	-0.0488821	-0.0898393	-0.351914	0.138213	-0.351914	-0.351914		0.0101913	0.0335138	0.0562719	0.0451073	-0.103324	0.00328321	-0.0432703	-0.0300254	-0.0486075	0.00820242	0.0294974	-0.0133823	-0.0410062	-0.039372	0.0721089	0.0496954	0.00820242	0.0496954	0.0250146	-0.0463729	0.0114007	-0.137203	-0.0174691	-0.0306691	-0.0868863
2	-0.041056	0.0251998	-0.0483028	-0.086984	-0.0483028	-0.086984	0.0206505	-0.041056	-0.00992545	0.10843	0.00639183	-0.041056	0.0405573	-0.0813269	0.0422015	0.0693915	0.00271181	0.0552381	-0.0981917	-0.0765266	-0.140208	-0.0765266	-0.0765266		-0.0197836	0.0745839	0.125257	-0.0158594	0.112445	-0.0198808	-0.0352238	0.160094	0.0429034	-0.0484189	0.0336601	-0.0775312	-0.0408428	0.059796	0.0422918	0.0874729	-0.0484189	0.0874729	0.00470749	-0.0564421	0.0103333	0.0441814	0.0080922	-0.016213	-0.0728118
3	-0.000408826	0.0225727	-0.00380884	0.00749504	-0.00380884	0.00749504	0.0537576	-0.000408826	0.0208474	-0.115014	0.0137921	-0.000408826	0.0405573	0.0325606	-0.0242959	-0.168792	-0.0604039	0.0235477	-0.0987644	-0.448881	0.26021	-0.448881	-0.448881		0.0496182	0.21123	0.122903	-0.0152441	-0.0543103	0.0237181	0.00372783	0.136659	0.0862565	-0.0171641	-0.0222345	-0.0466053	0.00394617	-0.027611	0.0309595	-0.0381208	-0.0171641	-0.0381208	0.0236313	-0.0312927	-0.00402891	0.00366193	-0.0292967	-0.0331227	-0.0510933
4	-0.0661397	0.0501327	-0.0248785	-0.0446877	-0.0248785	-0.0446877	0.0630054	-0.0661397	-0.101132	-0.0970561	-0.046432	-0.0661397	0.01162	0.042109	-0.0617732	0.0161077	-0.0089781	-0.181655	-0.0786398	-0.264083	0.0973673	-0.264083	-0.264083		-0.00638561	0.14977	0.115075	-0.0400969	0.0820031	0.117149	0.0284156	0.0855847	0.0788837	-0.0428646	-0.0149572	-0.0296583	-0.00552363	0.0256396	-0.0276631	-0.0533081	-0.0428646	-0.0533081	0.0800308	-0.0267917	-0.0355465	0.0296063	-0.036951	-0.00211609	-0.0814237
5	-0.0928926	-0.0218871	-0.0487478	-0.100852	-0.0487478	-0.100852	-0.1909	-0.0928926	0.0038177	-0.0234996	-0.14857	-0.0928926	-0.0938434	-0.159134	0.0181431	-0.0411692	-0.121672	-0.0791805	-0.056845	-0.161772	0.326022	-0.161772	-0.161772		0.0175261	0.152246	0.17352	0.0321761	-0.00150988	0.037809	-0.028278	0.191746	0.0862233	-0.0160593	-0.0318354	-0.026384	0.0140735	-0.0649977	-0.0583093	0.0687829	-0.0160593	0.0687829	0.0508037	-0.0649524	0.117068	-0.0405553	0.0120261	0.00355224	-0.0579825
6	0.00657282	-0.0416543	0.00631882	0.0323315	0.00631882	0.0323315	-0.0996811	0.00657282	-0.0258769	-0.0699808	0.0294066	0.00657282	0.0867205	0.125017	-0.0302636	0.168723	0.0220247	0.0348712	-0.078783	0.0108733	0.322703	0.0108733	0.0108733		0.0229313	0.187411	0.166453	-0.0567321	-0.0864651	0.0587181	0.037623	0.215467	0.195426	-0.0172442	0.00457079	0.0363346	-0.0421773	-0.157144	-0.0118844	0.013205	-0.0172442	0.013205	0.081288	-0.0264083	-0.00682215	0.0377037	-0.00426504	0.0201902	-0.0505287
7	-0.0482041	0.0425802	0.0569635	0.0265285	0.0569635	0.0265285	0.0045629	-0.0482041	0.0343682	-0.0493656	0.037577	-0.0482041	0.0206271	0.0346906	0.017228	0.0711697	0.00990833	0.0940789	-0.0720378	-0.0552369	0.117111	-0.0552369	-0.0552369		-0.0329573	0.224295	0.15717	-0.0182852	0.137869	0.0719644	0.0176238	0.299999	0.170893	-0.0386532	0.054869	0.0493829	-0.0318204	-0.027814	-0.00638845	0.00411392	-0.0386532	0.00411392	-0.0663634	-0.0222077	0.0412263	-0.00486008	-0.0316716	-0.0100918	-0.0220284
8	-0.0315695	-0.0941043	-0.120566	0.0243153	-0.120566	0.0243153	0.0821021	-0.0315695	-0.0161381	-0.079215	-0.0984437	-0.0315695	-0.0791112	-0.00639214	0.0383821	-0.0680634	0.0258184	-0.114036	-0.0462333	0.441925	0.37829	0.441925	0.441925		0.0395736	0.245346	0.155216	0.0516894	-0.0330942	0.0693514	0.0874628	0.190792	0.154419	-0.0455819	-0.00453569	0.0337338	-0.0366253	-0.09726	-0.014722	0.0273731	-0.0455819	0.0273731	0.00886271	-0.00267192	0.0180535	0.0281827	0.0499915	0.0339931	0.00962135
9	-0.0415233	-0.0691272	0.00608413	-0.106066	0.00608413	-0.106066	0.0369017	-0.0415233	-0.0515661	0.0426657	-0.0637492	-0.0415233	-0.0266041	-0.185935	0.0433069	-0.0315277	-0.089424	-0.0725396	-0.0225449	-0.0439456	0.133047	-0.0439456	-0.0439456		0.0485488	0.21429	0.166013	0.0135449	-0.00487565	0.109759	0.0529976	0.241363	0.101766	0.0125176	-0.0476456	0.0116513	0.0597534	-0.0666382	0.0766771	0.0217286	0.0125176	0.0217286	-0.040636	-0.0346829	-0.032095	0.0158242	0.0518996	-2.95971e-05	-0.0253648
10	0.0325911	0.0170563	-0.012368	-0.0784256	-0.012368	-0.0784256	-0.100229	0.0325911	0.0349499	0.014892	-0.00226766	0.0325911	-0.0200126	-0.0122355	-0.122621	-0.000381939	-0.0207452	0.0646629	-0.108755	0.12982	0.0838789	0.12982	0.12982		-0.0343878	0.0654726	-0.0709152	-0.00470421	0.0327183	0.0977935	0.00655173	-0.0446048	0.150733	0.0131214	-0.0422866	0.0215329	0.0297761	-0.0404747	0.0110485	-0.0362766	0.0131214	-0.0362766	0.128056	-0.0525873	-0.0410295	0.106465	-0.0557368	-0.0427669	-0.00577244
11	-0.0392858	0.035882	-0.0575161	0.132811	-0.0575161	0.132811	-0.0569456	-0.0392858	0.0384588	0.065473	-0.0292572	-0.0392858	0.0514025	-0.0635195	0.016438	-0.0340627	0.0314979	0.057706	-0.0288928	-0.241759	0.102915	-0.241759	-0.241759		-0.0409279	-0.0172612	-0.180547	0.0018434	0.0685998	-0.0294614	-0.0731394	-0.211156	-0.00363863	-0.0332728	-0.0391028	-0.0523923	0.034511	-0.0793226	0.044631	0.0135938	-0.0332728	0.0135938	-0.00327189	0.00655893	0.0147151	-0.0571635	-0.0274674	0.0201536	-0.0218121
12	0.0398047	-0.082108	-0.0221571	-0.158101	-0.0221571	-0.158101	-0.180066	0.0398047	-0.0367447	-0.0853905	-0.0436745	0.0398047	-0.0783365	-0.0676	-0.100518	-0.0195358	0.0576384	-0.0706409	-0.0832373	-0.387253	0.205983	-0.387253	-0.387253		-0.0225876	-0.124235	-0.176782	-0.0548514	0.0771649	0.0021721	-0.0239533	-0.298695	-0.024274	-0.00781937	0.0359145	-0.0214003	0.0249945	0.0699434	0.000995919	-0.0330892	-0.00781937	-0.0330892	-0.06655	-0.0492801	-0.0304715	-0.0171261	-0.0219735	-0.0524398	0.0253388
13	-0.117709	-0.100738	-0.0203501	-0.124214	-0.0203501	-0.124214	0.0196119	-0.117709	0.00816522	0.113564	0.0719284	-0.117709	-0.0211173	0.0135453	0.0446653	-0.0623535	-0.0154357	0.00172343	-0.0129519	-0.0960062	-0.0338209	-0.0960062	-0.0960062		-0.0223273	-0.231621	-0.226067	-0.000860932	0.00317779	-0.105331	-0.0609571	-0.321534	-0.0701514	-0.00124725	0.0041654	0.0472571	-0.142303	-0.0201797	-0.0317937	-0.0516497	-0.00124725	-0.0516497	-0.0549001	0.0266684	0.0484916	0.0842189	0.0507047	-0.0176623	0.109171
14	-0.015806	-0.0058417	0.0571738	-0.0544257	0.0571738	-0.0544257	0.108803	-0.015806	-0.0340582	-0.030658	-0.0411797	-0.015806	0.0493169	-0.00426211	-0.0278311	-0.081895	-0.0786874	-0.0477435	-0.0253613	-0.14505	0.160622	-0.14505	-0.14505		-0.0328919	-0.210811	-0.1077	-0.0448222	0.0476538	-0.105155	-0.0376877	-0.216173	-0.0919287	0.00112927	-0.0040512	0.00690266	-0.00676474	-0.0114393	-0.0354374	-0.041781	0.00112927	-0.041781	0.0536045	0.0421407	-0.0365911	-0.00229871	-0.0128071	-0.0216462	0.0489396
15	0.0807864	0.0104893	-0.034615	0.0976473	-0.034615	0.0976473	-0.134702	0.0807864	0.0194615	0.0135082	0.0250868	0.0807864	-0.0546384	-0.0268845	0.010942	0.0234665	0.064096	-0.0192128	0.0302404	0.157919	0.30432	0.157919	0.157919		-0.0200001	-0.0976055	-0.0209652	-0.0436152	0.041704	-0.0198548	-0.024612	-0.0584561	-0.0640745	0.000946462	-0.0276232	0.0172423	-0.115068	-0.0570793	-0.00325639	-0.000611121	0.000946462	-0.000611121	-0.0383686	0.00914651	0.0764216	-0.0101888	0.04901	-0.0555529	-0.0183406
16	-0.0338088	0.0526065	-0.0330184	-0.0362266	-0.0330184	-0.0362266	-0.0574898	-0.0338088	-0.0349131	-0.0955559	-0.0201524	-0.0338088	0.0732992	0.018646	-0.0296953	0.0624757	0.00142763	-0.133327	-0.0710828	0.211703	-0.0538372	0.211703	0.211703		0.0445308	-0.013393	0.0565363	-0.0132479	0.1272	-0.00654397	-0.0331328	-0.0162256	0.0057053	-0.00635689	-0.0121393	0.0299207	-0.0585374	0.0501119	-0.02246	0.0418004	-0.00635689	0.0418004	0.0178169	0.0313703	0.00178384	-0.01685	0.0249609	0.0205048	0.0619664
17	-0.0734205	-0.0170057	-0.0660227	0.0473812	-0.0660227	0.0473812	0.0829237	-0.0734205	0.0291485	-0.11438	-0.0495947	-0.0734205	0.0613906	-0.0935685	-0.0505027	0.151028	0.0586885	0.05587	-0.0663421	0.17283	0.0146403	0.17283	0.17283		0.0462726	0.0915259	0.137552	-0.0506141	-0.0818372	-0.0212655	0.0346843	0.208469	0.0212493	0.0117379	-0.0545867	-0.0207513	-0.0387807	0.00408631	0.00122786	0.038909	0.0117379	0.038909	0.0302694	-0.0110731	0.00352164	0.061891	-0.0560928	-0.00909543	-0.0337881
18	0.0629517	-0.0351314	-0.118081	0.137582	-0.118081	0.137582	0.0714316	0.0629517	0.0467944	0.00230822	0.00535707	0.0629517	-0.0866836	0.00752245	-0.0607643	-0.00818376	0.0219475	0.00880843	-0.0807875	0.0819826	-0.0814655	0.0819826	0.0819826		-0.00918241	0.127069	0.127681	0.00762451	-0.116728	0.0587247	-0.0211116	0.255133	-0.0226357	0.0444551	-0.0500582	-0.0886717	0.0537735	-0.0686102	0.0316668	-0.00150079	0.0444551	-0.00150079	0.00550228	0.041284	0.0287487	-0.0350192	0.0522717	-0.0326746	-0.00867939
19	0.0444142	0.0273009	0.0157937	-0.0155222	0.0157937	-0.0155222	-0.0654251	0.0444142	0.0433028	-0.126097	-0.0511568	0.0444142	-0.0477215	0.199487	-0.0799605	-0.154966	0.000980377	-0.103535	0.008636	-0.00584821	-0.2473	-0.00584821	-0.00584821		-0.00881414	0.117098	0.173031	0.0151696	0.0740692	0.111767	0.012963	0.24598	0.0285889	-0.0216621	-0.0134444	-0.0276844	-0.0203819	0.0404481	0.0903371	-0.00392811	-0.0216621	-0.00392811	-0.0284252	0.0240808	0.043372	-0.0590117	-0.0128699	0.0505071	-0.00736015
20	0.0571738	0.00525733	0.0257662	-0.0434571	0.0257662	-0.0434571	0.0523349	0.0571738	-0.0298305	0.0236154	-0.00210524	0.0571738	-0.0223458	-0.0552687	0.0559386	0.0652691	-0.0442414	0.0926215	0.0590674	0.0875852	-0.069011	0.0875852	0.0875852		0.0112607	0.230622	0.161209	0.0173525	-0.00469558	0.100634	0.0522463	0.186965	0.0165655	0.0123743	0.0140135	0.0312848	0.198384	0.0658168	-0.0328662	-0.0487495	0.0123743	-0.0487495	0.0552151	-0.0376433	-0.0451285	-0.0339865	0.0148129	-0.0411111	-0.0208702
21	0.0450161	0.06075	0.0554464	0.09863	0.0554464	0.09863	0.0974214	0.0450161	-0.0740733	-0.0282913	0.0294066	0.0450161	-0.0453059	0.000936481	0.00601723	0.0420543	0.00206972	0.0280396	-0.118778	0.190672	-0.302887	0.190672	0.190672		0.0424928	0.183939	0.174589	-0.00570174	0.095977	0.0499565	0.142835	0.153291	0.0620118	0.0647831	0.0056782	0.0158537	0.010463	0.00316627	-0.0245919	-0.0298003	0.0647831	-0.0298003	-0.00639717	0.032455	0.0105824	0.0222332	-0.0573825	-0.0357002	-0.0677526
22	0.0525979	-0.0445007	0.000300194	0.00306865	0.000300194	0.00306865	0.0743873	0.0525979	-0.0350847	0.0588901	0.109663	0.0525979	0.0430921	0.0501803	-0.0910121	-0.0350779	0.095274	0.168721	0.00249503	-0.164271	-0.0593833	-0.164271	-0.164271		0.0264503	0.200012	0.170985	0.0145662	-0.0406369	0.0562806	0.071269	0.37024	0.0617903	0.0160689	-0.0328933	-0.0300698	-0.0481066	-0.0664319	0.0251954	0.0554309	0.0160689	0.0554309	-0.055017	-0.0181346	-0.0254073	0.0201777	0.020227	0.0408549	-0.00375369
23	-0.137783	0.0298176	-0.026842	0.0875153	-0.026842	0.0875153	-0.0355476	-0.137783	-0.0504715	0.126439	0.000754489	-0.137783	-0.0765764	-0.183985	0.042929	-0.0445287	0.0376627	0.0236104	-0.0343336	-0.310886	-0.197424	-0.310886	-0.310886		0.0377095	0.160867	0.0306339	-0.0753752	0.0557679	0.0847099	0.0476267	0.131109	-0.012119	-0.0212412	-0.0604303	-0.0995942	0.0266597	-0.0283011	0.0729002	0.0260018	-0.0212412	0.0260018	0.00308902	-0.0539357	-0.00960336	-0.0867481	0.0316736	0.00671615	-0.00571875
24	-0.016707	0.0843688	0.138282	0.0260859	0.138282	0.0260859	-0.109587	-0.016707	0.0382365	-0.0111421	0.034657	-0.016707	0.0607351	0.0975715	-0.0236309	0.0364737	-0.087635	0.0315806	-0.0203815	-0.139706	-0.0406199	-0.139706	-0.139706		0.00499533	-0.00611266	-0.059936	0.0855513	-0.0511852	-0.00810368	0.0193788	-0.150478	-0.0422096	0.0119207	0.0287559	0.00776961	-0.0545767	0.0337372	-0.0325257	-0.0910682	0.0119207	-0.0910682	-0.0282176	0.0209553	-0.0385215	0.00558015	-0.0177703	-0.0434471	0.0347837
25	-0.03608	0.0425152	0.00139927	0.0149712	0.00139927	0.0149712	0.171297	-0.03608	-0.0197495	0.0105077	0.0103648	-0.03608	0.0366703	0.0364534	-0.00282351	-0.0641317	-0.00598333	0.036767	0.0412652	0.398484	0.313294	0.398484	0.398484		0.0145487	-0.0856829	-0.204465	0.0469998	0.0865705	-0.00589384	-0.00987783	-0.254556	-0.0290348	0.0099346	-0.0467459	0.076885	0.119821	-0.0612567	0.0407192	0.010916	0.0099346	0.010916	-0.0161671	0.0280264	-0.0513047	0.0262532	-0.0194011	-0.0610369	0.00924399
26	0.010947	0.013554	-0.00344333	0.0402503	-0.00344333	0.0402503	0.0346574	0.010947	0.00510202	-0.00877537	0.060004	0.010947	0.03761	0.0259746	0.0483596	-0.0461161	-0.0229043	0.0604899	0.0442719	-0.104022	-0.130526	-0.104022	-0.104022		0.00356484	-0.218298	-0.197527	0.010399	-0.0019306	-0.0610101	-0.0554253	-0.403132	-0.106608	-0.00609396	-0.0230453	0.00072631	-0.000317962	-0.0444457	0.0126211	0.0417444	-0.00609396	0.0417444	-0.0317305	0.0462689	-0.0441296	-0.0027583	-0.102125	0.0579695	0.00701047
27	-0.0388858	0.0139916	-0.00504001	-0.0673596	-0.00504001	-0.0673596	-0.083156	-0.0388858	-0.0263388	0.00946664	-0.0264796	-0.0388858	-0.149875	0.146815	-0.0192745	-0.0385051	0.0444119	-0.0156091	-0.015275	-0.118847	0.0348738	-0.118847	-0.118847		-0.0178469	-0.306266	-0.230823	0.0449335	0.0547766	-0.0963221	-0.0940135	-0.293934	-0.0739717	0.03089	-0.0406551	-0.0197326	-0.0340925	0.0435262	0.0418658	0.0133241	0.03089	0.0133241	-0.0417697	0.0180673	0.00895891	-0.00140336	-0.00185124	0.0869548	-0.0343004
28	-0.0813031	0.0113425	0.0361042	0.0405956	0.0361042	0.0405956	0.0224005	-0.0813031	0.047958	0.0217077	-0.103574	-0.0813031	0.0284424	0.113518	0.0245512	0.0813157	0.00965468	-0.0207954	0.0635854	-0.16384	-0.349663	-0.16384	-0.16384		0.00278452	-0.239882	-0.124101	-0.0112162	-0.0327938	-0.0598079	-0.0160958	-0.153044	-0.0708385	-0.00207328	-0.00911365	0.0623625	-0.0189035	-0.00411286	0.0213214	0.00735736	-0.00207328	0.00735736	-0.020723	0.0160438	-0.00960336	0.0100247	0.0246526	0.0595364	0.0420503
29	0.0551027	0.00718317	0.0335649	0.0280534	0.0335649	0.0280534	-0.160585	0.0551027	0.0483346	0.0252902	-0.00488285	0.0551027	0.0289329	-0.0299449	-0.0828022	0.0232143	-0.0123625	-0.0075107	0.0748329	-0.269168	0.10879	-0.269168	-0.269168		-0.0184827	-0.198803	-0.067371	0.0266962	-0.0806053	-0.0818931	-0.0492346	-0.0404802	0.00012595	-0.0520028	0.0158921	0.0247411	0.0265157	-0.0485453	0.0220271	-0.0612311	-0.0520028	-0.0612311	-0.0295944	0.00818063	-0.0260439	-0.00696186	-0.032281	-0.0194945	0.0707118
30	0.121768	-0.0232441	0.0668052	0.105958	0.0668052	0.105958	-0.116971	0.121768	0.0334787	0.121706	0.061506	0.121768	-0.0320038	-0.0666697	0.0598204	-0.0612768	-0.00576889	0.059098	0.0689625	-0.0648043	-0.398885	-0.0648043	-0.0648043		-0.0111839	-0.021155	-0.0246546	0.0248048	-0.01882	-0.0322498	0.0279135	-0.0238689	-0.0199123	0.0481113	0.0274112	-0.0648332	-0.107968	0.127267	-0.0393245	-0.0590997	0.0481113	-0.0590997	0.00409137	0.00814393	-0.0457868	-0.0509268	-0.0261697	0.0266197	0.0190678
31	0.0875008	0.0281321	0.113236	-0.0860988	0.113236	-0.0860988	0.04637	0.0875008	0.0369013	0.151497	0.101696	0.0875008	0.0484139	0.0767037	0.124235	-0.107454	0.0375659	0.0363258	0.0429354	0.141284	0.0406927	0.141284	0.141284		0.0186387	-0.0171924	0.099844	0.0124534	-0.154502	-0.00417811	0.0184347	0.136157	-0.0563025	-0.0194853	-0.0183091	-0.0605842	0.0115173	0.0881108	0.0466543	-0.010767	-0.0194853	-0.010767	0.00530917	-0.0594489	-0.000679658	0.0314558	-0.00988559	0.0613448	-0.00924391
32	-0.00501664	0.0139475	-0.0531185	-0.0425232	-0.0531185	-0.0425232	-0.0544274	-0.00501664	0.0268032	-0.00115783	-0.106006	-0.00501664	-0.0174366	-0.00675939	-0.0092658	-0.00926051	-0.0202979	-0.0201009	0.0555352	0.351422	-0.18138	0.351422	0.351422		-0.0180131	0.0487536	0.143946	-0.0593554	0.00368854	0.0343576	-0.00433201	0.199461	0.0208395	-0.0109339	0.0443684	0.101245	0.0402769	0.0249461	-0.0376548	-0.00602268	-0.0109339	-0.00602268	0.00716805	0.0952918	-0.0315727	0.0139298	0.0634569	0.00364759	0.0289714
33	0.106973	-0.00465996	-0.0718849	0.0850565	-0.0718849	0.0850565	-0.0376284	0.106973	0.0232262	0.0482657	0.0448166	0.106973	-0.0536575	0.0364534	0.0401497	0.134729	0.0112109	0.0413841	-0.0192045	0.301517	-0.238435	0.301517	0.301517		0.0108636	0.0920674	0.119541	-0.0479335	-0.039856	0.0442109	0.0111111	0.292766	-0.0331085	0.0271232	-0.00294379	0.0635552	0.0530265	0.00454971	0.0186401	0.0352768	0.0271232	0.0352768	-0.00103861	0.0148596	0.0616274	-0.0271754	0.0454163	0.0297979	-0.0241008
34	0.0158575	-0.118271	-0.0176031	-0.108968	-0.0176031	-0.108968	0.0873555	0.0158575	0.0210697	-0.0912815	-0.0400847	0.0158575	0.0484964	0.0292227	-0.0842885	-0.150967	0.00669912	-0.0184556	0.0835346	-0.0777333	-0.113339	-0.0777333	-0.0777333		0.00586982	0.164916	0.189439	-0.041862	0.0320872	0.103526	0.0509801	0.237916	0.141555	-0.0245634	0.0372197	0.0554294	-0.0126941	0.147589	0.028742	0.0169195	-0.0245634	0.0169195	-0.0260264	0.0111604	-0.0173693	0.0180185	-0.0543354	-0.0154948	-0.0103484
35	-0.0663733	-0.0186251	-0.0248529	-0.0987383	-0.0248529	-0.0987383	0.0809532	-0.0663733	0.0586379	-0.00935736	0.00499207	-0.0663733	0.0646634	0.0304224	-0.0167794	0.102377	-0.0432293	0.0669402	0.0256901	0.109133	-0.197643	0.109133	0.109133		-0.0412098	0.0475674	-0.0134111	0.0240038	-0.108013	0.0519586	0.0524402	-0.0744101	0.0438664	-0.00877291	0.0748025	0.020448	0.00858769	-0.0539268	-0.0465509	0.0441822	-0.00877291	0.0441822	-0.033923	0.0225316	0.021913	0.0042252	0.0475139	-0.0182264	0.0042922
36	-0.0769608	-0.0168304	-0.0471781	0.0750727	-0.0471781	0.0750727	0.0317585	-0.0769608	-0.0105245	-0.0963642	-0.0400044	-0.0769608	-0.00413445	-0.0578639	0.0405618	-0.0770712	0.0742101	0.024117	0.0676417	0.316773	0.132884	0.316773	0.316773		0.0203732	-0.0443465	-0.172533	0.0856787	0.0367454	-0.022884	0.00971559	-0.203954	-0.153382	-0.0067936	0.0290921	0.0162456	0.146258	0.0628199	0.00303077	0.00901585	-0.0067936	0.00901585	0.0524564	0.0391977	-0.0851041	0.01246	0.00171958	0.0211198	0.0582249
37	-0.0230195	0.0406972	-0.00223909	0.0722199	-0.00223909	0.0722199	-0.00337242	-0.0230195	-0.0914451	-0.0344151	0.0475942	-0.0230195	0.111115	-0.00184644	0.0844813	0.0317791	-0.0296928	0.0732651	0.13955	0.110426	-0.348302	0.110426	0.110426		-0.00268613	-0.155953	-0.226556	-0.00628255	0.00789575	-0.108307	-0.00995585	-0.23184	-0.00837694	0.0642674	0.0716186	-0.00746557	0.0672039	0.116223	-0.0831537	-0.0728686	0.0642674	-0.0728686	-0.0048273	0.0824621	0.0118773	0.0144006	0.00900985	0.0661343	0.0414321
38	0.0117489	0.00856227	0.0551847	0.166894	0.0551847	0.166894	0.165386	0.0117489	0.0420185	0.0758065	-0.0337375	0.0117489	-0.0263978	-0.0264275	0.0792098	0.0966671	-0.0127902	-0.146928	0.187579	0.140939	-0.149726	0.140939	0.140939		-0.0249358	-0.255156	-0.234976	0.0133473	0.0668572	-0.191352	-0.052685	-0.299505	-0.212379	0.0368584	0.0452286	0.0013557	-0.0843206	-0.0354753	-0.000234535	0.0811542	0.0368584	0.0811542	-0.0264205	-0.0202489	0.0573708	-0.00213758	-0.0101389	-0.0225329	0.0504199
39	0.0400383	-0.0148825	0.055917	-0.0474896	0.055917	-0.0474896	0.0492689	0.0400383	-0.0275196	0.00455856	0.139553	0.0400383	0.00405217	0.100354	0.0777577	0.0412298	0.0581445	0.0164001	0.172895	0.337545	0.0819745	0.337545	0.337545		-0.0866202	-0.32577	-0.268723	-0.000420467	-0.23483	-0.141513	-0.0789522	-0.331394	-0.169568	0.028975	0.0189573	0.0393469	-0.0120832	-0.0201526	-0.065266	-0.0487039	0.028975	-0.0487039	-0.0518169	-0.0276571	0.0564393	-0.0104186	0.023734	0.00423238	0.0779523
40	0.133959	0.0929499	0.0953068	-0.0150795	0.0953068	-0.0150795	0.0347143	0.133959	0.0567718	0.157563	0.186617	0.133959	0.0253346	-0.0264275	0.075578	0.0182058	0.0688026	-0.0557138	0.158545	-0.00127997	-0.0239761	-0.00127997	-0.00127997		-0.0075204	-0.453055	-0.214813	0.0331391	0.00504158	-0.166836	-0.0340629	-0.281725	-0.156681	0.00488815	0.0229222	-0.0844667	0.0233526	0.152815	-0.161579	-0.019422	0.00488815	-0.019422	0.035268	0.0169372	-0.0270657	0.0122988	0.0567681	-0.0327047	0.0207629
41	0.0937796	-0.0324161	-0.147996	0.0321854	-0.147996	0.0321854	0.141089	0.0937796	0.0294226	0.0329077	0.193977	0.0937796	0.0426842	0.235379	0.213404	0.035963	0.0983472	0.1283	0.236498	0.264195	-0.316104	0.264195	0.264195		-0.0501196	-0.317707	-0.148522	0.0169574	-0.0715296	-0.173439	-0.11818	-0.189517	-0.236203	0.0382565	0.00167372	-0.0241971	0.0911352	0.0967734	-0.000320074	-0.0311628	0.0382565	-0.0311628	-0.0505925	0.00228494	-0.0843098	-0.0769062	0.121879	-0.00145661	-0.0170766
42	0.112317	-0.000894088	0.0106382	-0.0467526	0.0106382	-0.0467526	-0.0930049	0.112317	0.0795177	0.0599894	0.134363	0.112317	0.170947	-0.0255869	0.109773	0.0102133	0.0703	0.157841	0.316234	0.479419	0.112704	0.479419	0.479419		-0.027176	-0.217447	-0.0381399	0.0523739	0.031727	-0.0162607	-0.0555958	-0.0632472	-0.0671734	-0.0160356	0.0538902	0.0252603	0.035612	0.12478	-0.0228022	-0.0446164	-0.0160356	-0.0446164	0.0125266	0.0693127	0.0368781	-0.0392578	0.0273437	-0.00472381	0.00404983
43	0.306203	0.297277	0.219472	0.252865	0.219472	0.252865	0.0412233	0.306203	0.187702	1.36235	1.36482	0.306203	0.352213	-0.0319852	1.66725	0.117218	0.274897	0.263034	0.500473	0.304102	-0.0155456	0.304102	0.304102		0.0628207	-0.0591053	0.058001	0.0108859	-0.0558729	-0.0039832	0.00241536	0.0995283	-0.0304515	-0.0687559	0.0373779	0.0987521	-0.02849	0.122014	-0.114593	0.0376673	-0.0687559	0.0376673	-0.127755	0.0409933	-0.0150647	0.0735376	-0.0312836	0.0544099	0.0138199
44	1.641	2.26154	1.68761	2.2684	1.68761	2.2684	1.57083	1.641	0.844067	5.01016	3.96042	1.641	6.37983	1.86546	6.19763	2.20183	3.2694	4.12387	1.05374	0.367541	0.138213	0.367541	0.367541		0.0325783	0.010881	0.0997782	-0.0100092	0.0808007	-0.0290716	0.0262694	0.121783	-0.0459505	0.0170788	0.129273	0.093788	-0.038664	0.0880364	-0.10404	-0.0534465	0.0170788	-0.0534465	-0.112661	0.0718375	-0.0481709	-0.0126577	-0.036959	0.0356935	0.0203318
45	4.21192	3.58195	3.38751	4.43639	3.38751	4.43639	3.9045	4.21192	1.24025	5.85219	4.29919	4.21192	8.66308	6.25777	7.11148	6.80836	3.6009	6.24991	1.20816	1.53218	0.213272	1.53218	1.53218		0.0600311	0.0674322	0.142693	-0.023695	0.0741592	0.0575416	0.0648761	0.195419	0.0443308	0.0162596	0.0187496	-0.00809251	-0.000201243	0.0141594	-0.145652	-0.066049	0.0162596	-0.066049	-0.115551	-0.0544282	-0.0802902	0.0226816	0.0637821	0.137871	0.0816922
46	4.42958	3.51562	3.44022	4.1384	3.44022	4.1384	4.36728	4.42958	1.31009	6.02095	4.23566	4.42958	8.74641	8.36972	6.7004	8.68961	3.55597	6.19576	1.25837	3.58384	0.237149	3.58384	3.58384		0.0665784	0.042771	0.1761	0.148805	-0.0610721	0.090033	0.0202861	0.244	0.0491473	-0.0270584	0.0827323	-0.10317	-0.0666688	0.0540051	-0.111997	-0.0121015	-0.0270584	-0.0121015	-0.0677257	-0.0439862	0.0756948	-0.0249475	0.00321574	0.0843693	-0.0620737
47	4.35861	3.53007	3.37824	4.49787	3.37824	4.49787	4.47891	4.35861	1.27236	5.6713	4.1709	4.35861	8.34603	8.46969	6.84126	8.92646	3.55002	6.20652	1.29736	3.39413	0.194344	3.39413	3.39413		0.0860174	0.176632	0.166185	0.037492	-0.069426	0.0876671	-0.00339239	0.195296	0.0989658	-0.0135959	0.0823269	-0.0207293	0.134306	0.199838	-0.0453567	-0.0739071	-0.0135959	-0.0739071	-0.00493765	0.0143584	0.0635807	0.054127	0.00194899	0.239641	-0.0269265
48	4.24889	3.49839	3.35474	4.59324	3.35474	4.59324	4.345	4.24889	1.32255	5.2277	4.10165	4.24889	7.92199	8.18313	6.78692	8.72659	3.4087	6.29723	1.22493	2.27094	0.765546	2.27094	2.27094		0.0353319	0.00541431	-0.0885321	0.0225064	0.165516	0.0979363	0.0445593	-0.069373	-0.0541099	-0.0129053	0.0593185	0.014208	0.112417	0.177723	-0.105904	-0.021739	-0.0129053	-0.021739	0.0606157	0.0302682	-0.0272919	-0.038064	0.0626261	0.227703	0.0243156
49	4.24031	3.43529	3.46899	4.45277	3.46899	4.45277	4.73752	4.24031	1.33738	5.37909	4.03267	4.24031	7.87913	8.63542	6.6148	8.33306	3.39835	5.72533	1.17674	2.6302	1.69583	2.6302	2.6302		0.0258799	-0.141822	-0.150116	0.0206139	-0.0872771	0.0157171	0.0298847	-0.232097	-0.0159713	-0.02883	0.0960114	0.00902839	0.172484	0.161758	-0.0359852	0.000926532	-0.02883	0.000926532	0.0514396	0.104468	-0.00629985	0.0258287	0.0294334	0.26615	-0.0352684
50	4.23516	3.44187	3.42669	4.33001	3.42669	4.33001	4.64564	4.23516	1.3677	4.76426	3.9005	4.23516	7.68522	7.86902	6.47887	7.59434	3.31633	5.97924	1.13409	2.69183	2.00476	2.69183	2.69183		0.020561	-0.225638	-0.212102	0.0627982	0.101927	-0.0185355	0.0254312	-0.271495	0.0324412	-0.0100357	0.0804878	0.135661	0.00610158	0.142078	-0.0418709	-0.0215708	-0.0100357	-0.0215708	0.0706957	0.131165	0.0413731	0.0134926	0.071999	0.287407	0.0358345
51	4.18106	3.46486	3.43494	4.3157	3.43494	4.3157	4.65806	4.18106	1.39435	4.42078	3.81274	4.18106	7.51669	7.5755	6.18298	7.50293	3.26506	5.95425	1.16246	1.83067	2.4538	1.83067	1.83067		-0.0049911	-0.345755	-0.227951	0.109789	-0.0844524	-0.0204399	-0.0254731	-0.271291	-0.0666202	0.0170145	0.0314552	0.206008	0.258969	0.188716	0.00191054	0.0308845	0.0170145	0.0308845	-0.000174196	0.0894415	0.0320294	0.0246685	-0.00621303	0.289934	0.0491022
52	4.22805	3.41219	3.44828	4.48528	3.44828	4.48528	4.81024	4.22805	1.50599	4.29861	3.65066	4.22805	7.23401	7.26993	6.07834	7.60354	3.19453	5.97702	1.13016	3.72442	3.45849	3.72442	3.72442		-0.0190897	-0.276379	-0.205242	0.118728	0.0349725	-0.0862545	0.00986774	-0.233924	-0.0583613	-0.00908211	0.0282714	0.122483	0.168878	0.21124	0.0870833	0.0290964	-0.00908211	0.0290964	0.0448304	0.119702	0.0658853	0.0329383	0.00764036	0.373235	0.05435
53	4.14592	3.38288	3.42043	4.26136	3.42043	4.26136	4.5895	4.14592	1.47209	3.99266	3.70671	4.14592	6.77526	7.15725	6.24705	7.1741	3.14307	5.8142	1.07873	2.72346	2.74626	2.72346	2.72346		-0.0577363	-0.377438	-0.251337	0.0480092	0.0878032	-0.0655791	-0.0174773	-0.324458	-0.126114	-0.0119992	0.011146	0.255877	0.347493	0.243733	0.117267	0.116837	-0.0119992	0.116837	0.108282	0.238961	-0.0140309	-0.00272327	0.0041653	0.388686	0.0492356
54	4.21045	3.3725	3.37497	4.25585	3.37497	4.25585	4.78283	4.21045	1.51933	4.02996	3.57656	4.21045	6.87271	7.08881	5.77449	6.9632	3.10197	5.71356	1.08644	3.05892	2.43335	3.05892	3.05892		-0.0166042	-0.353465	-0.2337	-0.0174496	-0.0425604	-0.0652154	0.0852018	-0.242357	-0.0590815	0.0314779	0.0710452	0.334029	0.407494	0.154864	0.0598866	0.0189038	0.0314779	0.0189038	0.088784	0.25959	0.0570639	0.143654	0.0106167	0.406107	0.0333586
55	4.15407	3.37657	3.37934	4.41844	3.37934	4.41844	4.78923	4.15407	1.56547	4.11299	3.58999	4.15407	6.58115	6.64125	5.49783	6.38939	3.01011	5.7233	1.02473	2.11114	3.01342	2.11114	2.11114		0.182091	-0.297499	-0.140783	0.134897	-0.0409676	0.151792	0.258033	-0.188174	0.0562654	0.0175077	0.00763595	0.43216	0.222125	0.153687	0.136117	0.0178285	0.0175077	0.0178285	0.191176	0.236163	-0.0558466	0.0270799	-0.0767458	0.49695	0.0783558
56	4.23055	3.32364	3.41942	4.32318	3.41942	4.32318	4.68537	4.23055	1.64488	3.93804	3.39188	4.23055	6.15862	6.34374	5.5504	6.60214	2.95257	5.47685	0.989384	2.59339	3.21129	2.59339	2.59339		0.4005	-0.0586925	0.075446	0.0491125	-0.00547643	0.217892	0.356636	0.0643469	0.217567	0.0332191	0.0130346	0.576087	0.221425	0.0448318	0.179728	0.0736393	0.0332191	0.0736393	0.269299	0.344268	0.0658745	0.108269	-0.0640005	0.526901	0.0676714
57	4.04281	3.42502	3.36982	4.36503	3.36982	4.36503	4.63191	4.04281	1.58445	3.65617	3.40828	4.04281	6.70377	6.69262	5.58823	6.38261	2.97496	5.57535	1.00132	1.91204	3.05562	1.91204	1.91204		0.366117	0.14647	0.192014	0.101245	-0.0342663	0.30431	0.404988	0.226251	0.467734	0.0678514	-0.00727456	0.487664	0.338634	0.0625628	0.188221	0.0128057	0.0678514	0.0128057	0.318784	0.337653	-0.00889934	0.0345805	-0.0519285	0.537988	-0.00859809
58	4.08096	3.31272	3.39513	4.20229	3.39513	4.20229	4.96083	4.08096	1.48457	3.95017	3.42765	4.08096	5.94621	6.11662	5.1696	6.53992	2.9219	5.55896	1.06463	1.70052	3.49999	1.70052	1.70052		0.369333	0.247753	0.193978	0.25408	0.0281812	0.299305	0.375879	0.302934	0.530195	-0.017427	0.0025735	0.622706	0.305423	0.164883	0.199224	0.0660684	-0.017427	0.0660684	0.324647	0.348906	0.0695523	0.0894439	-0.0562744	0.536495	0.043638
59	4.06182	3.23995	3.32203	4.18138	3.32203	4.18138	4.65866	4.06182	1.62328	3.42765	3.34716	4.06182	6.07808	6.07053	5.28154	6.23684	2.94592	5.71071	1.00159	2.98005	3.49091	2.98005	2.98005		0.432455	0.327349	0.17641	0.143836	-0.00899282	0.286066	0.395459	0.291094	0.616106	0.0605638	0.0060045	0.597479	0.417761	0.0830912	0.242603	-0.035387	0.0605638	-0.035387	0.319973	0.339849	0.0514557	0.0772354	-0.0286793	0.614917	0.0406237
60	3.98597	3.29786	3.41389	4.14607	3.41389	4.14607	4.53254	3.98597	1.53067	3.47857	3.27396	3.98597	6.21305	6.67806	5.33181	6.35381	2.94827	5.57136	1.0024	2.05951	3.31223	2.05951	2.05951		0.419455	0.327117	0.191783	0.195783	0.125307	0.319207	0.415462	0.24794	0.475949	0.0479285	0.000279572	0.703523	0.411855	0.0865752	0.160756	-0.0660122	0.0479285	-0.0660122	0.285499	0.371877	0.0952342	0.158159	-0.116334	0.597217	0.0302093
61	3.95193	3.27354	3.41366	4.08395	3.41366	4.08395	4.59721	3.95193	1.63973	3.35507	3.41013	3.95193	5.7661	5.98975	5.26061	6.38102	2.85972	5.16886	0.943121	2.22449	3.62378	2.22449	2.22449		0.436198	0.372614	0.205638	0.314409	-0.0148526	0.25622	0.418912	0.310075	0.545661	-0.0575977	-0.0056431	0.79899	0.372175	0.196608	0.307879	-0.0129264	-0.0575977	-0.0129264	0.389343	0.372224	0.0266487	-0.0181363	-0.0951275	0.570884	0.0195249
62	3.95581	3.29293	3.44488	3.99454	3.44488	3.99454	4.82053	3.95581	1.55712	3.53464	3.35258	3.95581	5.68273	5.73425	4.95723	5.85111	2.83906	5.36148	0.930378	1.86963	3.65005	1.86963	1.86963		0.393888	0.368222	0.187875	0.218908	-0.0208033	0.22913	0.379283	0.284712	0.537912	-0.00107234	-0.0161833	0.611825	0.366246	-0.0150552	0.25396	-0.0281418	-0.00107234	-0.0281418	0.384179	0.418212	-0.00912679	0.107005	-0.0942957	0.633357	0.0424538
63	3.94078	3.28866	3.47312	3.87385	3.47312	3.87385	4.53188	3.94078	1.52364	3.51345	3.23434	3.94078	5.34116	6.39716	5.10071	6.15152	2.86662	5.29702	0.942882	1.58743	3.57874	1.58743	1.58743		0.37726	0.407401	0.184649	0.227277	0.194065	0.270291	0.373806	0.275735	0.647723	0.0204326	-0.0174489	0.756338	0.424792	0.186846	0.289662	-0.0230087	0.0204326	-0.0230087	0.467169	0.468091	0.0729472	0.109889	-0.0505032	0.617173	0.0228353
64	4.06606	3.30685	3.4844	3.82142	3.4844	3.82142	4.52985	4.06606	1.5576	3.06841	3.21597	4.06606	5.73331	5.90174	5.11507	5.99498	2.84739	5.1576	0.924507	2.59219	4.07614	2.59219	2.59219		0.417554	0.376225	0.150869	0.180043	-0.0943393	0.235941	0.358501	0.258344	0.643927	0.0636874	-0.0494056	0.819948	0.440308	0.0458297	0.262002	0.0179388	0.0636874	0.0179388	0.500585	0.38991	-0.0449239	0.0444799	-0.0829758	0.685152	0.0984866
65	3.86626	3.20327	3.43755	3.71602	3.43755	3.71602	4.49915	3.86626	1.58325	3.14093	3.32691	3.86626	5.63354	6.14287	5.05177	5.93078	2.81755	5.19916	0.958601	1.26688	4.14347	1.26688	1.26688		0.362728	0.287672	0.105633	0.254498	-0.0327332	0.199479	0.314962	0.124768	0.63435	0.0410145	-0.00805568	0.569718	0.388979	-0.0831651	0.350295	0.000101664	0.0410145	0.000101664	0.493229	0.384206	0.122619	0.0983568	-0.0944144	0.738662	0.0134426
66	3.96265	3.28897	3.45671	3.77327	3.45671	3.77327	4.62419	3.96265	1.5075	3.50819	3.26153	3.96265	5.75595	5.88858	5.1141	5.95457	2.85707	5.31802	0.93531	2.83706	4.02382	2.83706	2.83706		0.365279	0.255438	0.154168	0.233324	-0.0281053	0.215201	0.361591	0.066245	0.561748	0.104462	0.0415109	0.699708	0.429643	0.112891	0.317664	-0.0256024	0.104462	-0.0256024	0.591487	0.489131	0.0706089	0.151969	-0.0762949	0.685724	0.0469224
67	4.00714	3.21432	3.42714	3.85285	3.42714	3.85285	4.57713	4.00714	1.47748	3.47015	3.35367	4.00714	5.39624	5.68909	5.01918	6.01604	2.82233	5.23104	0.920053	1.73172	3.65271	1.73172	1.73172		0.352402	0.302052	0.0792644	0.280756	-0.0454752	0.153592	0.30148	0.138199	0.595736	0.00559569	0.0115613	0.810086	0.387267	0.0527502	0.218013	-0.0652153	0.00559569	-0.0652153	0.542174	0.511154	0.0681899	0.0919142	0.0119234	0.791843	0.0224856
68	3.79589	3.21292	3.37055	3.72035	3.37055	3.72035	4.56482	3.79589	1.58121	3.38296	3.1921	3.79589	5.49774	5.91714	4.84198	5.9618	2.82461	5.24711	0.910779	2.38972	3.81572	2.38972	2.38972		0.362489	0.335739	0.0454152	0.181111	-0.0154837	0.170647	0.307629	0.0852357	0.616947	0.0235313	0.0198076	0.922091	0.562863	-0.0452643	0.335612	-0.0844885	0.0235313	-0.0844885	0.536663	0.492165	0.171995	0.0878367	-0.13079	0.813204	0.0294561
69	3.85501	3.23871	3.39455	3.93026	3.39455	3.93026	4.46162	3.85501	1.48467	3.07026	3.37424	3.85501	5.43611	5.78183	4.93892	5.82758	2.79614	5.23016	0.873902	2.75647	3.79081	2.75647	2.75647		0.38276	0.257225	0.0728214	0.105041	0.00525194	0.186993	0.273421	0.0564468	0.553112	0.0303021	0.00117934	0.871333	0.435316	0.0155428	0.320978	-0.0334885	0.0303021	-0.0334885	0.526369	0.46533	0.0540673	0.0902257	-0.088699	0.802366	0.133365
70	3.94939	3.15791	3.41575	3.69065	3.41575	3.69065	4.48706	3.94939	1.5183	3.25196	3.18908	3.94939	5.32233	5.77237	4.8722	5.44426	2.84636	5.29968	0.926353	1.71801	3.95148	1.71801	1.71801		0.296484	0.290225	0.147625	0.225257	-0.0701774	0.191705	0.254827	0.080157	0.556744	0.0580925	-0.0317464	0.791687	0.473001	0.288243	0.380575	-0.0323397	0.0580925	-0.0323397	0.532273	0.556805	0.0651367	-0.0315975	-0.0936782	0.691993	0.0973821
71	3.95227	3.21879	3.35903	3.94251	3.35903	3.94251	4.47168	3.95227	1.46141	3.21951	3.22222	3.95227	5.19022	5.63846	4.83819	6.21293	2.81858	5.13584	0.873313	2.30413	3.95344	2.30413	2.30413		0.333743	0.269208	0.083837	0.151509	-0.0360393	0.172967	0.271385	0.00983489	0.756018	0.0215848	0.0239011	0.835247	0.465527	0.0596438	0.387837	-0.0559036	0.0215848	-0.0559036	0.532004	0.57452	-0.00760561	0.100114	-0.115471	0.842883	0.122304
72	3.89843	3.13225	3.37366	3.64658	3.37366	3.64658	4.52279	3.89843	1.43194	3.10848	3.16329	3.89843	5.23323	5.21288	4.67507	5.44705	2.76385	5.09416	0.849641	2.82172	3.75051	2.82172	2.82172		0.340297	0.3009	0.0257708	0.151462	0.0654444	0.154313	0.23299	0.0773971	0.551263	0.00300476	-0.00956848	0.785944	0.468503	-0.0597955	0.373861	-0.0761873	0.00300476	-0.0761873	0.567667	0.576233	0.0878089	0.0767533	-0.121092	0.853583	0.138425
73	3.8829	3.13974	3.34139	3.70181	3.34139	3.70181	4.65007	3.8829	1.48511	3.02252	3.18614	3.8829	5.19235	5.91065	4.73684	5.95679	2.7958	5.30651	0.855098	3.1914	3.24865	3.1914	3.1914		0.323641	0.280657	0.162849	0.188365	0.00465031	0.202118	0.171175	0.0518394	0.537237	0.0415392	-0.0228871	0.780091	0.506215	-0.0793733	0.392346	0.017846	0.0415392	0.017846	0.544373	0.593227	0.0751279	0.0705629	-0.103843	0.840131	0.122035
74	4.03957	3.1573	3.33815	4.02563	3.33815	4.02563	4.60542	4.03957	1.46736	2.99821	3.16978	4.03957	5.14807	5.8321	4.8368	5.66748	2.82121	4.92722	0.868524	1.17914	3.40502	1.17914	1.17914		0.327269	0.220015	0.0547974	0.123603	-0.107592	0.155516	0.237527	-0.057409	0.519867	0.046975	-0.0026175	0.799401	0.378949	0.242657	0.370571	-0.000982399	0.046975	-0.000982399	0.641801	0.598839	-0.0488292	0.0328921	-0.120229	0.841515	0.1416
75	4.05848	3.1421	3.41151	3.72266	3.41151	3.72266	4.61538	4.05848	1.50081	2.92742	3.18063	4.05848	4.95526	5.63642	4.79348	5.88035	2.84814	5.23073	0.926385	2.18191	3.65886	2.18191	2.18191		0.244165	0.277632	0.0887131	0.129907	-0.0476991	0.116915	0.1849	-0.0399367	0.660754	0.0401884	-0.0354246	0.711845	0.545728	0.0706605	0.425271	0.0268635	0.0401884	0.0268635	0.591998	0.620854	0.028011	0.0863781	-0.0999162	0.846699	0.144344
76	4.01165	3.18352	3.46634	3.8285	3.46634	3.8285	4.38993	4.01165	1.57617	3.02015	3.10773	4.01165	5.44806	5.84582	4.51281	5.72609	2.81726	5.19315	0.872868	1.61208	3.32551	1.61208	1.61208		0.315887	0.231507	0.0437258	0.195934	0.0177229	0.108238	0.158601	-0.147205	0.579295	0.0252714	0.00922786	0.709396	0.620448	0.12063	0.336403	-0.0628896	0.0252714	-0.0628896	0.640708	0.490215	-0.0177207	0.0897199	-0.0715691	0.926316	0.104138
77	4.1208	3.16984	3.40654	3.76835	3.40654	3.76835	4.49603	4.1208	1.49655	3.11224	3.18415	4.1208	5.16411	5.40383	4.85875	5.614	2.86993	5.12117	0.802009	2.2294	4.09251	2.2294	2.2294		0.27	0.170718	0.060821	0.152124	-0.0514856	0.0674664	0.151655	-0.0108495	0.582992	0.0371123	0.00727011	0.766178	0.487769	0.0549793	0.383305	-0.0411873	0.0371123	-0.0411873	0.58292	0.640117	0.100479	0.0221534	-0.0682835	0.809835	0.18676
78	4.01867	3.07816	3.2846	3.7415	3.2846	3.7415	4.39092	4.01867	1.47871	2.95074	3.06377	4.01867	4.78603	5.23365	4.48054	5.47408	2.80073	5.18815	0.838027	1.69129	4.01898	1.69129	1.69129		0.200923	0.26858	0.103464	0.130359	-0.126945	0.110682	0.161687	0.0551844	0.588163	0.0313109	-0.0177752	0.643055	0.511043	0.127165	0.418714	-0.00930289	0.0313109	-0.00930289	0.541075	0.679699	0.130532	0.0438479	-0.0818038	0.879682	0.0877485
79	3.99726	3.10982	3.39219	3.74086	3.39219	3.74086	4.3073	3.99726	1.45665	3.1493	3.11462	3.99726	5.05491	5.03556	4.70201	5.7807	2.79738	5.50659	0.71817	1.38738	4.09741	1.38738	1.38738		0.210231	0.189517	0.0293743	0.128339	-0.0537095	0.0999384	0.141435	-0.0509458	0.577933	-0.0217896	-0.00225165	0.722745	0.67452	0.118093	0.431423	0.0343398	-0.0217896	0.0343398	0.576483	0.613017	0.0177129	0.049901	-0.0821838	0.865863	0.168648
80	3.99495	3.16583	3.3561	3.80701	3.3561	3.80701	4.09023	3.99495	1.48149	3.04358	3.18669	3.99495	5.06433	5.57113	4.58237	5.8572	2.82959	5.03078	0.867889	1.98573	3.33785	1.98573	1.98573		0.256147	0.153277	0.0797307	0.110961	-0.0354982	0.0676485	0.157547	0.00268359	0.535399	0.0331706	-0.11326	0.819578	0.547393	0.0119032	0.383098	0.119776	0.0331706	0.119776	0.559564	0.599314	0.0680082	0.0443888	-0.0837917	0.899689	0.225486
81	4.06546	3.02836	3.32718	3.78758	3.32718	3.78758	4.23239	4.06546	1.48191	2.85883	3.13936	4.06546	5.19272	5.77395	4.3981	5.67452	2.7825	5.1514	0.806003	1.88954	3.8192	1.88954	1.88954		0.19864	0.158143	0.0799626	0.105668	-0.0266934	0.111657	0.0560277	0.0831331	0.566762	0.0322893	-0.0136125	0.620473	0.521704	0.0264344	0.37982	-0.0312276	0.0322893	-0.0312276	0.467328	0.61361	0.0412142	0.165476	-0.118353	0.871664	0.176667
82	4.20848	3.16218	3.36183	3.93105	3.36183	3.93105	4.35206	4.20848	1.42677	3.04774	3.12083	4.20848	5.09899	5.34781	4.70431	5.92875	2.8202	5.26881	0.844009	1.7855	3.69372	1.7855	1.7855		0.209335	0.244538	0.0330573	0.0741046	-0.162646	0.0937959	0.0489949	0.00879856	0.619272	-0.0153845	-0.0231244	0.607405	0.435363	-0.0131069	0.474961	-0.061175	-0.0153845	-0.061175	0.535572	0.603815	0.0524883	0.117215	-0.0674048	0.908059	0.218032
83	3.97468	3.1509	3.34205	3.77652	3.34205	3.77652	4.52307	3.97468	1.43743	2.88112	3.09911	3.97468	5.17115	5.99708	4.92003	5.45111	2.77328	5.13901	0.875986	2.09735	3.78896	2.09735	2.09735		0.235552	0.220143	0.0705334	0.0813723	-0.00920318	0.129199	0.00929649	0.0409026	0.646704	0.0583622	-0.0450254	0.708399	0.442533	0.00749586	0.351891	-0.0442276	0.0583622	-0.0442276	0.5898	0.667134	0.000273488	0.0739047	-0.102774	1.00215	0.170208
84	4.0531	3.11472	3.38403	3.71381	3.38403	3.71381	4.46944	4.0531	1.44147	2.90721	3.23402	4.0531	5.02082	5.68288	4.6663	5.7691	2.84601	5.15501	0.866409	1.63122	4.0112	1.63122	1.63122		0.179208	0.203081	0.0113568	0.172393	-0.195011	0.101362	0.026518	-0.0445125	0.641579	0.0764976	-0.0458857	0.603222	0.577417	-0.00375431	0.521264	-0.0502976	0.0764976	-0.0502976	0.580265	0.638559	-0.00921705	0.10271	-0.114443	0.942031	0.22048
85	3.95584	3.16023	3.45454	3.71002	3.45454	3.71002	4.349	3.95584	1.43645	3.36489	3.1655	3.95584	4.90684	5.44658	4.56519	5.65232	2.77626	5.09156	0.753059	2.59891	4.11655	2.59891	2.59891		0.229171	0.160369	0.0284221	0.149745	-0.0272344	0.0801664	0.105292	-0.0276345	0.596377	0.00387142	-0.00846107	0.634128	0.484276	0.0175926	0.448592	0.0330159	0.00387142	0.0330159	0.571608	0.600616	0.111663	0.121695	-0.080174	0.902449	0.225217
86	4.03483	3.05643	3.38921	3.72301	3.38921	3.72301	4.14686	4.03483	1.42254	3.41379	3.1522	4.03483	4.77404	5.59728	4.42193	5.93554	2.79559	5.00092	0.844789	1.04985	3.82584	1.04985	1.04985		0.192801	0.192543	-0.00526494	0.155816	-0.165862	0.0860097	0.0529741	0.0184946	0.655694	0.0133911	-0.013039	0.573878	0.569002	0.0295328	0.532317	0.0457567	0.0133911	0.0457567	0.582761	0.622439	0.0262275	0.10201	-0.115036	1.02123	0.262733
87	3.9878	3.08453	3.35181	3.52771	3.35181	3.52771	4.11562	3.9878	1.33207	2.91119	3.18022	3.9878	4.73123	5.45029	4.53371	5.71639	2.78707	4.9727	0.798	1.82722	3.69041	1.82722	1.82722		0.183276	0.198611	0.0320224	0.130649	-0.0290368	0.0705081	0.0316441	0.0589707	0.667208	0.0525371	-0.0361661	0.606234	0.587564	0.0845254	0.41016	-0.0775306	0.0525371	-0.0775306	0.494259	0.652081	-0.0164379	0.025484	-0.0701916	0.926507	0.192518
88	4.01422	3.10612	3.37851	3.74957	3.37851	3.74957	4.52908	4.01422	1.41479	2.90086	3.15986	4.01422	5.0762	5.60377	4.55269	5.34417	2.84412	5.15026	0.77471	2.20957	3.54633	2.20957	2.20957		0.183284	0.226152	0.00882144	0.121966	-0.0724316	0.0989568	0.0123595	0.0591552	0.710406	0.0419917	-0.0455594	0.637248	0.696385	0.0809129	0.446679	-0.0749736	0.0419917	-0.0749736	0.58695	0.570438	0.0180535	0.0672673	-0.111205	1.07392	0.305308
89	3.9348	3.08782	3.35731	3.56307	3.35731	3.56307	4.24175	3.9348	1.43813	3.18111	3.26567	3.9348	5.18383	5.46012	4.43305	5.97474	2.80641	5.03495	0.836229	1.95789	3.2344	1.95789	1.95789		0.215268	0.189844	0.0737038	0.0481603	-0.0870365	0.107289	0.0549041	-0.0172827	0.653946	0.0289829	-0.0405365	0.677907	0.750644	0.191842	0.492934	-0.0783449	0.0289829	-0.0783449	0.562045	0.603077	0.0368781	0.0977137	-0.138761	0.999685	0.304286
90	4.14388	3.1532	3.31205	3.82506	3.31205	3.82506	4.19912	4.14388	1.35834	3.00173	3.12251	4.14388	4.97634	5.68659	4.43236	5.99174	2.793	5.11206	0.798081	1.16086	3.75704	1.16086	1.16086		0.181514	0.273471	0.0404694	0.082277	-0.0408775	0.0763319	0.0422013	-0.0124601	0.706565	0.0662851	-0.0184673	0.61653	0.611752	-0.0515422	0.436712	-0.0798651	0.0662851	-0.0798651	0.535903	0.702862	0.0548387	0.00379924	-0.109281	0.982556	0.263756
91	3.95942	3.1495	3.40293	3.76442	3.40293	3.76442	4.27699	3.95942	1.35969	3.25663	3.22996	3.95942	5.04366	5.70634	4.40324	5.65149	2.84101	5.14913	0.816917	1.8255	3.55606	1.8255	1.8255		0.137613	0.228017	0.0490844	0.0927477	-0.134729	0.0753308	0.0443057	-0.0837986	0.773876	0.0671675	-0.0313014	0.665532	0.634205	0.124757	0.452772	-0.0603134	0.0671675	-0.0603134	0.57835	0.719619	0.11239	0.059296	-0.0516273	1.02688	0.320459
92	4.04615	3.12455	3.3956	3.76191	3.3956	3.76191	4.43031	4.04615	1.38105	3.16616	3.26662	4.04615	5.09658	5.60906	4.52033	5.51156	2.81648	4.95506	0.859695	2.4972	3.96459	2.4972	2.4972		0.157796	0.191477	0.0368822	0.10503	-0.0882683	0.0730105	0.0238234	0.014021	0.815457	0.0660865	-0.104964	0.619758	0.440144	0.103153	0.358836	-0.0248511	0.0660865	-0.0248511	0.540308	0.69427	0.0955748	0.0760415	-0.0896885	0.860327	0.291206
93	4.02207	3.1133	3.35254	3.79417	3.35254	3.79417	4.2	4.02207	1.44666	3.29526	3.2443	4.02207	4.72235	5.45372	4.4136	5.58064	2.83385	5.0228	0.787883	1.51115	3.9381	1.51115	1.51115		0.122271	0.23192	0.111028	0.0591773	-0.11808	0.0779893	0.0640836	-0.00722768	0.714293	0.0158782	-0.00249884	0.635145	0.548284	-0.00790463	0.382305	-0.0289386	0.0158782	-0.0289386	0.708461	0.716065	0.114661	0.0949113	-0.159438	0.969301	0.316855
94	4.1709	3.09001	3.4186	3.69743	3.4186	3.69743	4.27874	4.1709	1.45008	3.13117	3.21652	4.1709	4.91769	6.03668	4.40833	5.65467	2.84885	5.1602	0.954305	2.40092	3.62851	2.40092	2.40092		0.179656	0.184025	0.0981155	0.135107	-0.169618	0.0629234	0.0818396	0.0466992	0.755675	0.0145669	-0.0171226	0.739651	0.528057	0.0694056	0.384559	-0.0737407	0.0145669	-0.0737407	0.603068	0.645675	0.0383079	0.114263	-0.102331	0.931991	0.25867
95	3.99756	3.13149	3.37285	3.8827	3.37285	3.8827	4.37494	3.99756	1.42275	3.39543	3.25928	3.99756	4.84009	5.46253	4.28389	5.16218	2.91383	5.20289	0.71615	2.04917	3.76606	2.04917	2.04917		0.165666	0.195311	0.0575249	0.122802	0.0349725	0.125234	0.0200192	-0.0108187	0.73101	0.0616765	-0.0813525	0.56874	0.523602	0.0112876	0.233269	0.0363521	0.0616765	0.0363521	0.610701	0.658086	0.0049971	0.0525311	-0.0932902	0.96578	0.285769
96	4.04979	3.14885	3.32035	3.83008	3.32035	3.83008	4.31327	4.04979	1.35076	2.92326	3.28353	4.04979	5.13149	5.08304	4.41003	5.39219	2.85651	5.15994	0.829436	1.46564	3.80941	1.46564	1.46564		0.154126	0.26467	0.0376396	0.122685	0.101236	0.151967	-0.0271634	-0.0464007	0.853607	0.0671438	-0.0118921	0.653351	0.479895	-0.10761	0.424198	0.0144362	0.0671438	0.0144362	0.634576	0.673877	-0.0190831	0.0478679	-0.150073	0.92026	0.314889
97	4.12822	3.11166	3.3554	3.98574	3.3554	3.98574	4.32427	4.12822	1.33816	3.50692	3.29213	4.12822	5.00327	5.67843	4.56295	5.8834	2.88397	5.42682	0.793498	1.78559	3.92194	1.78559	1.78559		0.175848	0.231456	0.0918144	0.255973	-0.108463	0.0994637	-0.102709	0.0808244	0.959078	0.0775064	-0.0266048	0.5288	0.605986	0.0593359	0.40776	-0.0765673	0.0775064	-0.0765673	0.673474	0.678278	0.063127	0.1669	-0.170354	0.962857	0.4146
98	4.09528	3.17161	3.33553	3.83416	3.33553	3.83416	4.14457	4.09528	1.33524	3.06697	3.30584	4.09528	5.20258	5.15158	4.41919	6.03487	2.92836	5.2752	0.792003	2.20173	3.28444	2.20173	2.20173		0.19723	0.118818	0.0860617	0.207856	-0.0162351	0.110695	0.00339679	0.20098	0.946923	0.0196619	-0.0976967	0.669497	0.589556	0.00303773	0.395551	-0.0146041	0.0196619	-0.0146041	0.623969	0.640335	-0.0180625	0.0584343	-0.184374	0.980675	0.424961
99	3.98931	3.02416	3.38686	3.69522	3.38686	3.69522	4.15233	3.98931	1.24331	3.22436	3.30697	3.98931	4.78009	5.25359	4.61821	5.6964	2.88701	5.03716	0.865486	2.08416	3.69041	2.08416	2.08416		0.147166	0.228301	0.0886401	0.075603	-0.018008	0.0422287	0.0119911	0.0367265	0.963352	0.0832525	-0.0248448	0.636426	0.524003	0.066818	0.446095	-0.0112206	0.0832525	-0.0112206	0.687103	0.697486	0.0342546	0.0550812	-0.113382	1.00379	0.326355
100	4.08119	3.1652	3.32634	3.69212	3.32634	3.69212	4.28027	4.08119	1.34391	3.1101	3.30468	4.08119	5.16959	5.18542	4.4741	6.20734	2.8894	5.34965	0.92333	1.69276	3.69329	1.69276	1.69276		0.154668	0.233587	-0.0119828	0.0837052	-0.0773296	0.075916	-0.0288677	0.098738	0.913246	-0.000976423	0.0198966	0.516359	0.579643	0.120603	0.422357	-0.0402801	-0.000976423	-0.0402801	0.639243	0.648144	0.060436	0.137981	-0.104998	1.05609	0.434111
101	4.0337	3.03018	3.37246	3.70019	3.37246	3.70019	4.45784	4.0337	1.2651	2.99872	3.26721	4.0337	4.93598	5.54535	4.65635	5.70694	2.88913	5.20049	0.83693	1.58166	3.14966	1.58166	1.58166		0.177488	0.256787	0.0869839	0.0774718	-0.0777806	0.103064	0.015146	0.0429852	0.905385	0.0269562	-0.0400421	0.748753	0.53136	-0.0229736	0.483686	0.0117584	0.0269562	0.0117584	0.636788	0.746673	0.0979132	0.108693	-0.111593	1.02061	0.416403
102	4.02214	3.16163	3.3639	3.91492	3.3639	3.91492	4.26763	4.02214	1.41427	3.41293	3.39695	4.02214	5.10645	5.72564	4.59898	5.84249	2.88924	5.58344	0.881443	1.50365	3.59637	1.50365	1.50365		0.121195	0.193222	0.0721173	0.188436	-0.0318321	0.0745313	-0.0217608	0.00991717	0.946602	0.0723573	-0.0484169	0.626086	0.532582	0.018489	0.453028	-0.0439491	0.0723573	-0.0439491	0.580189	0.709742	0.0987544	0.125428	-0.139133	1.04387	0.396595
103	4.09836	3.02368	3.33537	3.64717	3.33537	3.64717	4.26216	4.09836	1.3471	3.32263	3.35002	4.09836	4.86919	5.58597	4.51448	5.99314	2.92064	5.44864	0.813591	1.94022	3.63406	1.94022	1.94022		0.150295	0.216164	0.035183	0.1596	-0.0780213	0.0927369	0.0486076	-0.0135787	1.07492	0.0446944	-0.0530739	0.844609	0.589299	0.0728152	0.30794	-0.039084	0.0446944	-0.039084	0.629639	0.678725	0.0944737	0.0643613	-0.0935596	0.94559	0.390028
104	4.07992	3.11382	3.38429	3.70412	3.38429	3.70412	4.07616	4.07992	1.29038	3.36743	3.25026	4.07992	4.85912	5.66897	4.59775	5.76979	2.92573	5.31612	0.755174	1.91023	3.65777	1.91023	1.91023		0.191052	0.23718	0.0536466	0.191826	0.0449494	0.0954276	0.00739439	0.128872	0.964437	-0.00489442	-0.0415944	0.594793	0.517043	0.0487792	0.422991	0.0008162	-0.00489442	0.0008162	0.653423	0.683937	0.00695032	0.0722864	-0.134969	1.02082	0.418825
105	3.95868	3.10064	3.34255	4.05858	3.34255	4.05858	4.17707	3.95868	1.31701	3.01749	3.40595	3.95868	5.16362	5.92419	4.31117	5.99225	2.94785	5.50387	0.803998	2.47582	3.99787	2.47582	2.47582		0.154386	0.331716	0.0535079	0.07818	-0.0415987	0.0686624	-0.0402948	0.0477148	0.965511	0.0525935	0.0199361	0.582829	0.749282	0.0481873	0.493092	-0.051084	0.0525935	-0.051084	0.633828	0.755903	0.00470225	0.0654864	-0.146424	1.09371	0.486079
106	4.07401	3.1175	3.31389	3.78247	3.31389	3.78247	4.15693	4.07401	1.29666	3.1336	3.31575	4.07401	5.07223	5.83219	4.47009	6.18768	2.92925	5.41094	0.811683	2.2581	3.5546	2.2581	2.2581		0.126427	0.244933	0.0888583	0.222773	-0.078532	0.0605182	-0.0416078	0.069836	0.971246	-0.0201917	-0.0943844	0.822461	0.402082	0.0546985	0.442915	-0.0492679	-0.0201917	-0.0492679	0.612091	0.639871	0.0472544	0.0756394	-0.152376	1.07555	0.412285
107	4.12708	3.05872	3.31449	3.53105	3.31449	3.53105	4.27398	4.12708	1.38578	3.01327	3.293	4.12708	5.08811	6.09733	4.60384	6.39345	2.9495	5.36938	0.879215	2.28137	3.4531	2.28137	2.28137		0.163317	0.305688	0.0656079	0.127411	-0.119642	0.127178	0.000702185	0.0122973	1.05609	-0.0314763	-0.00433794	0.668262	0.598112	0.059593	0.469929	-0.00755158	-0.0314763	-0.00755158	0.633269	0.684137	-0.0361254	0.105385	-0.125185	1.08504	0.406795
108	4.06846	3.09432	3.28575	3.56228	3.28575	3.56228	3.93241	4.06846	1.25053	3.15	3.36043	4.06846	4.51854	6.25517	4.49595	6.09336	2.92546	5.16304	0.885913	2.03538	3.41351	2.03538	2.03538		0.170688	0.338653	0.0491873	0.193566	-0.0519963	0.148919	-0.0569729	0.0312373	1.11114	-0.0317313	-0.0670056	0.610807	0.524376	0.0365819	0.388775	-0.0482206	-0.0317313	-0.0482206	0.611275	0.729678	0.0469824	0.0943144	-0.126246	1.12868	0.515684
109	4.1215	3.08324	3.29132	3.82034	3.29132	3.82034	4.22391	4.1215	1.23065	2.98908	3.27871	4.1215	4.62556	5.86808	4.44423	5.9023	2.95963	5.37609	0.798255	1.79981	3.58598	1.79981	1.79981		0.190062	0.365635	0.0924292	0.136186	-0.127516	0.109948	-0.015165	0.0761147	1.21419	0.0368821	-0.0583045	0.779594	0.653121	0.0383239	0.483686	-0.0673274	0.0368821	-0.0673274	0.703026	0.751347	-0.0517018	0.123934	-0.071584	1.0317	0.452384
110	4.1874	3.16855	3.33666	3.6814	3.33666	3.6814	4.07649	4.1874	1.24199	3.15421	3.36035	4.1874	5.08602	5.97853	4.43716	5.66025	2.91498	5.25723	0.844487	1.62708	3.66528	1.62708	1.62708		0.179945	0.30739	0.182563	0.123603	-0.00562705	0.0919175	0.0248689	0.114621	0.873081	0.039886	-0.08597	0.582763	0.526863	0.0197439	0.414024	-0.000278371	0.039886	-0.000278371	0.633213	0.648983	-0.0111245	0.103559	-0.106764	1.0701	0.534871
111	4.03787	3.1048	3.3516	3.94993	3.3516	3.94993	4.25127	4.03787	1.3135	3.03481	3.40668	4.03787	5.21973	6.2472	4.44988	5.6305	2.9432	5.32156	0.780851	1.34514	3.59686	1.34514	1.34514		0.196154	0.275586	0.0657401	0.211107	0.118576	0.130239	-0.047167	-0.0385106	1.05089	0.0639413	-0.113794	0.745567	0.556719	-0.0505714	0.427829	-0.0790122	0.0639413	-0.0790122	0.626064	0.679226	0.0690083	0.0828401	-0.179576	0.957798	0.444446
112	4.05704	3.20951	3.3243	3.91172	3.3243	3.91172	3.99605	4.05704	1.25865	3.21662	3.28353	4.05704	4.94589	5.71395	4.46939	5.92304	2.97541	5.34731	0.800896	1.81757	3.47541	1.81757	1.81757		0.238688	0.305241	0.0780218	0.0729786	-0.00394417	0.154573	0.0426616	0.137953	1.1918	0.014234	-0.0441257	0.883056	0.478206	-0.0403698	0.386582	-0.0112486	0.014234	-0.0112486	0.691168	0.633702	0.0451086	0.0705741	-0.0960212	1.00155	0.503384
113	3.92301	3.13532	3.36691	3.86175	3.36691	3.86175	4.17203	3.92301	1.28807	3.32603	3.39792	3.92301	4.92628	6.01423	4.49589	6.13814	2.95351	5.5379	0.802678	1.45875	3.90699	1.45875	1.45875		0.212485	0.228215	0.0725237	0.318878	0.0713051	0.138838	0.0100472	-0.0517461	1.07745	0.00527747	-0.031341	0.758635	0.525221	0.0901369	0.350563	0.0520754	0.00527747	0.0520754	0.728885	0.621966	0.0666688	0.00298375	-0.15016	1.01745	0.45669
114	4.18951	3.22693	3.36961	3.93587	3.36961	3.93587	3.83665	4.18951	1.28831	3.35369	3.44448	4.18951	5.23806	6.24136	4.65076	5.93136	2.93754	5.08739	0.824171	1.91204	3.52691	1.91204	1.91204		0.133552	0.356205	0.0733105	0.108651	-0.0519063	0.0989373	0.0209404	0.101775	1.16451	0.024732	-0.0360772	0.946125	0.421535	-0.0428323	0.34068	-0.0516216	0.024732	-0.0516216	0.710355	0.679627	0.0210164	0.0593646	-0.121852	1.06089	0.527632
115	4.13059	3.09313	3.33723	3.62037	3.33723	3.62037	4.04481	4.13059	1.32712	3.22228	3.39591	4.13059	4.83015	6.16837	4.60371	6.10947	2.96718	5.41442	0.79474	1.93496	3.33687	1.93496	1.93496		0.223751	0.398582	0.0941942	0.262194	-0.0172869	0.127672	-0.00984104	0.0267022	1.11999	0.0246993	-0.0603117	0.668262	0.581378	0.10869	0.394758	0.042522	0.0246993	0.042522	0.760379	0.641138	0.0103333	0.0397256	-0.145213	0.913764	0.586731
116	4.14305	3.14963	3.40387	3.65902	3.40387	3.65902	4.1867	4.14305	1.2071	3.16674	3.26058	4.14305	5.0527	5.82672	4.47018	5.99117	2.99414	5.55903	0.819303	1.82179	2.95016	1.82179	1.82179		0.166866	0.317877	0.0531112	0.356349	-0.13007	0.0891685	-0.00140278	0.0797365	1.1369	-0.0426423	-0.0486245	0.639761	0.555809	0.127625	0.434215	0.0510947	-0.0426423	0.0510947	0.683369	0.699053	0.00189697	0.146445	-0.102394	1.07124	0.517109
117	3.89916	3.16953	3.35437	3.99105	3.35437	3.99105	3.99633	3.89916	1.20359	3.23209	3.35594	3.89916	5.20016	5.76968	4.51354	5.81356	2.97589	5.43726	0.766517	1.70776	3.42754	1.70776	1.70776		0.188508	0.386857	0.11687	0.328141	-0.114324	0.125592	-0.0382729	0.0795728	1.25935	-0.0217817	-0.0585517	0.765093	0.586066	0.0502641	0.378796	-0.0210805	-0.0217817	-0.0210805	0.632038	0.692457	0.0530106	0.0490855	-0.148925	0.943532	0.532638
118	4.04782	3.15228	3.31412	3.82919	3.31412	3.82919	3.83588	4.04782	1.33779	3.26835	3.26232	4.04782	5.14675	5.52467	4.37429	5.86703	2.94894	5.38039	0.822548	1.85265	3.7901	1.85265	1.85265		0.210014	0.347145	0.100627	0.349338	0.00636348	0.132878	0.00763403	0.0323659	1.13599	-0.0124754	-0.0406947	0.831997	0.484159	0.0988232	0.408418	0.00925753	-0.0124754	0.00925753	0.657932	0.601774	0.0878209	0.144297	-0.112226	1.06091	0.581511
119	3.89565	3.16021	3.33022	3.87926	3.33022	3.87926	4.32284	3.89565	1.21091	3.10121	3.34804	3.89565	4.93148	5.71905	4.62904	6.26171	3.00188	5.47926	0.777748	1.68259	3.49809	1.68259	1.68259		0.191681	0.379087	0.110877	0.345971	-0.10651	0.0942577	-0.00289972	0.0584779	1.16285	-0.00695271	-0.0947898	0.78241	0.537994	0.0772462	0.540785	0.0445237	-0.00695271	0.0445237	0.726935	0.658514	0.0054857	0.098368	-0.144318	1.05626	0.573195
120	4.04986	3.1997	3.3342	3.93842	3.3342	3.93842	4.2783	4.04986	1.18495	3.0907	3.41639	4.04986	5.28132	6.14389	4.56453	5.77157	3.06902	5.53151	0.763002	2.27827	2.76083	2.27827	2.27827		0.182958	0.297608	0.0706923	0.331972	-0.125081	0.111403	0.0380789	0.00520753	1.15412	0.00391091	-0.0358398	0.75014	0.568111	-0.0373492	0.415279	0.00740464	0.00391091	0.00740464	0.674844	0.673294	0.0490825	0.0175939	-0.166388	1.05294	0.611977
121	3.98891	3.15226	3.3275	3.98308	3.3275	3.98308	3.8934	3.98891	1.1628	3.47655	3.40777	3.98891	5.07673	5.78814	4.37776	5.91702	3.03422	5.53442	0.809901	2.01262	3.06797	2.01262	2.01262		0.201877	0.372821	0.0571016	0.460163	0.0335302	0.162522	-0.0548078	0.0806091	1.21653	0.00903635	-0.0482587	0.770383	0.449941	0.0643589	0.468759	0.00114895	0.00903635	0.00114895	0.581488	0.704284	0.0425537	0.061891	-0.155829	1.10434	0.637246
122	4.02374	3.13195	3.30451	3.76658	3.30451	3.76658	3.9949	4.02374	1.22216	3.5344	3.47937	4.02374	4.97237	5.82385	4.45395	6.13979	3.07777	5.62665	0.794278	1.68561	3.06384	1.68561	1.68561		0.278888	0.404453	0.0299728	0.314514	-0.0266328	0.145045	-0.0426026	0.091536	1.27095	-0.0932083	-0.0734622	0.79693	0.565251	0.142539	0.454989	-0.0486286	-0.0932083	-0.0486286	0.582463	0.645265	-0.0665418	0.0131367	-0.166879	1.09302	0.69998
123	3.9682	3.1346	3.33553	3.77731	3.33553	3.77731	3.8859	3.9682	1.12316	3.54619	3.4437	3.9682	4.98772	5.92029	4.53422	6.44274	3.04605	5.30176	0.74679	2.05296	3.30913	2.05296	2.05296		0.23269	0.385921	0.0282209	0.304356	-0.222899	0.166799	0.0619513	0.117104	1.174	0.03248	-0.0469041	0.80844	0.517416	-0.117785	0.484124	0.0754362	0.03248	0.0754362	0.692876	0.617283	0.0287487	0.0901683	-0.159873	1.11964	0.652398
124	3.95711	3.23768	3.3806	4.11518	3.3806	4.11518	4.07392	3.95711	1.23534	3.62846	3.37961	3.95711	5.37058	6.28457	4.63021	6.15571	3.00147	5.60729	0.73559	1.86334	3.32469	1.86334	1.86334		0.180379	0.350996	0.0639849	0.300827	-0.0351675	0.146533	-0.0153172	0.10787	1.1644	-0.0310554	-0.0648402	0.892984	0.483642	0.0792216	0.500769	-0.0153362	-0.0310554	-0.0153362	0.623644	0.696502	0.0494231	0.0237605	-0.0857227	1.18129	0.548355
125	3.90063	3.19736	3.33338	3.60192	3.33338	3.60192	3.92081	3.90063	1.22599	3.36651	3.42412	3.90063	5.35941	6.53441	4.58992	6.23291	3.05688	5.55378	0.814132	1.47236	3.92804	1.47236	1.47236		0.305929	0.335515	0.0619842	0.326492	-0.037001	0.126047	0.0174767	-0.0135271	1.23893	0.034641	-0.0431468	0.957285	0.512074	0.129753	0.49916	-0.0702556	0.034641	-0.0702556	0.601484	0.695928	-0.0280525	0.121856	-0.150192	1.14117	0.648227
126	3.93269	3.1967	3.35029	3.72916	3.35029	3.72916	3.77372	3.93269	1.10002	3.55918	3.38145	3.93269	4.95522	6.7198	4.70422	6.24077	3.11574	5.64113	0.797094	1.74379	3.13215	1.74379	1.74379		0.284662	0.396683	0.0664903	0.291993	-0.0807257	0.157778	0.0348821	0.0455706	1.23833	4.0314e-05	-0.0411495	0.808959	0.576666	0.0408337	0.497833	-0.0179018	4.0314e-05	-0.0179018	0.69457	0.65487	0.00119294	0.114115	-0.0867201	1.1487	0.571634
127	3.98737	3.17954	3.39403	4.01608	3.39403	4.01608	3.88306	3.98737	1.07197	3.45375	3.41856	3.98737	5.49909	6.3608	4.39282	6.3807	3.09084	5.48008	0.846952	2.25965	3.36744	2.25965	2.25965		0.267601	0.332077	0.0817477	0.404466	-0.0557828	0.154964	0.0159475	0.119802	1.21291	0.0337675	0.0255325	0.936633	0.634606	0.0942365	0.565217	-0.0265849	0.0337675	-0.0265849	0.678072	0.68011	0.0096521	0.130699	-0.124401	1.0791	0.610765
128	3.7839	3.15999	3.31462	3.91088	3.31462	3.91088	3.94314	3.7839	1.09884	3.75306	3.39628	3.7839	5.22251	6.72554	4.62143	6.79231	3.09012	5.55441	0.788694	1.26705	3.11752	1.26705	1.26705		0.220832	0.360915	0.0538784	0.277193	0.0253262	0.161925	0.00323517	0.104781	1.1965	-0.0197866	-0.0219873	1.01162	0.555618	0.000450125	0.430803	-0.0126199	-0.0197866	-0.0126199	0.651031	0.60848	0.118702	0.10117	-0.104682	1.09207	0.753267
129	3.92698	3.16664	3.33893	3.84621	3.33893	3.84621	4.18199	3.92698	1.20461	3.52332	3.49493	3.92698	5.38098	6.54804	4.82152	6.54474	3.09545	5.43068	0.800069	1.8205	3.40029	1.8205	1.8205		0.297503	0.32961	0.148607	0.303845	0.140212	0.165505	-0.00668108	0.024066	1.25166	-0.0164566	-0.0401212	1.08142	0.72062	0.317353	0.468309	0.029254	-0.0164566	0.029254	0.683231	0.58744	0.0358901	0.0415976	-0.115804	1.12214	0.596206
130	4.05013	3.26287	3.33925	4.02199	3.33925	4.02199	3.61153	4.05013	1.1412	3.68948	3.51587	4.05013	5.54198	6.66035	4.57103	6.53668	3.13852	5.65062	0.807324	1.26309	3.40785	1.26309	1.26309		0.240429	0.398719	0.121125	0.369177	0.00606309	0.187318	0.0122397	0.129118	1.18023	0.0212586	-0.0708519	0.992504	0.591618	-0.0279933	0.445863	-0.00361287	0.0212586	-0.00361287	0.597466	0.662387	-0.00146312	0.0345679	-0.139402	1.15266	0.670591
131	3.97775	3.11621	3.30554	3.77878	3.30554	3.77878	3.62319	3.97775	1.11337	3.64936	3.51334	3.97775	5.39718	6.16197	4.53308	6.431	3.10868	5.65644	0.836977	2.22431	3.55253	2.22431	2.22431		0.236882	0.417286	0.100251	0.234904	-0.0462863	0.195462	-0.0369509	0.0649619	1.2253	-0.0376433	-0.0419603	0.991767	0.576126	0.193892	0.430619	0.0234344	-0.0376433	0.0234344	0.629777	0.634467	0.0480716	0.0361078	-0.161623	1.07448	0.680306
132	3.98978	3.15139	3.3141	3.81768	3.3141	3.81768	3.69903	3.98978	1.108	3.81841	3.50993	3.98978	5.16779	6.744	4.57163	6.26887	3.09574	5.45902	0.850388	1.7718	3.45104	1.7718	1.7718		0.311595	0.291471	0.0862929	0.309592	-0.0159347	0.183503	0.00598495	0.0720824	1.32771	0.0238417	-0.0434335	0.831823	0.398612	-0.000625508	0.465456	-0.0329596	0.0238417	-0.0329596	0.610639	0.595286	0.00615483	0.00367314	-0.129491	1.07953	0.729394
133	3.92448	3.1437	3.29645	3.89333	3.29645	3.89333	3.97663	3.92448	1.06701	3.93521	3.5677	3.92448	5.24723	6.32992	4.70722	6.70731	3.11838	5.52601	0.824187	1.15724	3.45746	1.15724	1.15724		0.264465	0.396149	0.10958	0.334293	0.00200566	0.16546	-0.0768795	0.0913515	1.35516	0.0286726	-0.0409419	0.939383	0.537173	0.0789882	0.43592	-0.0313292	0.0286726	-0.0313292	0.659135	0.595532	0.0547592	0.0878367	-0.100233	1.08424	0.679257
134	4.00784	3.29394	3.38015	4.15989	3.38015	4.15989	3.69476	4.00784	1.07849	3.72257	3.58275	4.00784	5.5216	6.53775	4.46782	6.82238	3.11465	5.50305	0.788376	1.26929	3.49058	1.26929	1.26929		0.247569	0.404152	0.0356096	0.220985	0.075572	0.200909	-0.032663	0.177422	1.33632	-0.0110614	-0.0328142	0.87662	0.470915	0.0327868	0.319577	0.0584239	-0.0110614	0.0584239	0.604257	0.62828	-0.0353756	0.0502107	-0.100391	1.08771	0.773773
135	4.04585	3.19276	3.31946	4.21625	3.31946	4.21625	4.05679	4.04585	1.10636	3.60894	3.50675	4.04585	5.35802	6.19694	4.75966	6.86006	3.15629	5.74348	0.826573	1.49521	3.3626	1.49521	1.49521		0.321256	0.44071	0.0512004	0.379032	-0.0132598	0.197016	-0.0375406	0.0384401	1.31254	0.0220057	0.03191	1.01314	0.515774	0.112739	0.283923	0.00436436	0.0220057	0.00436436	0.597833	0.643407	0.082439	0.0696676	-0.0826197	1.08147	0.638405
136	3.81964	3.25049	3.33909	3.81006	3.33909	3.81006	3.81734	3.81964	1.09381	3.57378	3.41453	3.81964	5.33657	6.37499	4.73182	6.36871	3.12541	5.58022	0.864484	2.3193	3.09076	2.3193	2.3193		0.262752	0.38574	0.0608607	0.329372	-0.0760077	0.131253	-0.0205676	0.113543	1.3313	0.0155927	-0.00585074	0.909824	0.485777	0.102053	0.465639	-0.0186059	0.0155927	-0.0186059	0.64292	0.625583	0.102206	0.0772017	-0.116414	1.15281	0.722398
137	3.87241	3.18788	3.42308	3.85737	3.42308	3.85737	3.76748	3.87241	1.03278	3.49895	3.55829	3.87241	5.05897	5.94042	4.49926	6.40532	3.17497	5.63063	0.712045	1.06424	2.97083	1.06424	1.06424		0.242879	0.388224	0.0846602	0.362618	0.109199	0.196288	0.00707672	0.0921617	1.13192	-0.0617944	-0.0300754	1.09595	0.435503	0.171956	0.378492	0.0559493	-0.0617944	0.0559493	0.575936	0.558774	0.0289978	0.0640278	-0.0902979	1.09329	0.811667
138	3.98476	3.21524	3.29352	4.09354	3.29352	4.09354	3.73558	3.98476	1.06653	3.89393	3.49965	3.98476	5.19444	6.54322	4.52168	6.63405	3.08672	5.60065	0.728336	1.7749	3.34514	1.7749	1.7749		0.300184	0.310123	0.0742958	0.423422	0.0127046	0.157511	-0.0683588	0.114919	1.32468	-0.0208598	-0.0315882	0.887739	0.535955	0.0167707	0.337367	0.0510474	-0.0208598	0.0510474	0.599203	0.531411	0.0160774	0.0159279	-0.0666846	1.09243	0.737227
139	3.9519	3.12958	3.27476	3.82885	3.27476	3.82885	3.80502	3.9519	1.06723	3.71379	3.47404	3.9519	5.03142	6.17449	4.63036	7.07287	3.14772	5.5243	0.827861	1.97668	3.03914	1.97668	1.97668		0.317484	0.439996	0.147566	0.35022	0.0397805	0.163952	0.0129904	0.0970143	1.37917	-0.0266691	-0.00829298	0.981927	0.599423	-0.0249456	0.486025	-0.000388704	-0.0266691	-0.000388704	0.560683	0.531966	0.0785903	0.0726072	-0.202708	1.01394	0.801924
140	3.94221	3.3093	3.3264	3.8527	3.3264	3.8527	4.00979	3.94221	1.02684	3.48752	3.5063	3.94221	5.28046	6.0875	4.68843	7.02885	3.13387	5.59065	0.898274	1.05355	3.04632	1.05355	1.05355		0.207738	0.408682	0.0741337	0.419359	-0.0027123	0.159324	-0.00267401	0.0194894	1.15492	-0.0107906	-0.0657894	0.678837	0.619674	0.123245	0.497905	-0.0300507	-0.0107906	-0.0300507	0.613101	0.518508	0.0140797	0.0402875	-0.0817888	1.13567	0.737657
141	3.88326	3.1742	3.32203	3.73943	3.32203	3.73943	3.79348	3.88326	1.13175	3.70184	3.45277	3.88326	5.36813	6.59293	4.60394	6.66507	3.17065	5.76916	0.862893	2.06227	3.03202	2.06227	2.06227		0.263243	0.380385	0.074428	0.405069	0.00407981	0.196073	0.016818	0.114764	1.32482	-0.0285998	-0.0247657	1.06255	0.656821	0.0929038	0.332334	-0.0140297	-0.0285998	-0.0140297	0.60658	0.571166	0.0688482	0.104697	-0.151783	1.11114	0.833411
142	3.93069	3.22363	3.31313	3.95087	3.31313	3.95087	4.06971	3.93069	1.06374	3.9034	3.5836	3.93069	5.49561	6.22234	4.57965	6.98241	3.18541	5.65638	0.814212	2.09632	2.9934	2.09632	2.09632		0.315425	0.374196	0.103186	0.449332	-0.0896508	0.0941472	0.0197472	0.0548968	1.26157	0.0376528	0.0262642	1.02828	0.631392	0.125856	0.41267	0.0131665	0.0376528	0.0131665	0.577976	0.535848	0.0690191	0.0262182	-0.0784633	1.09879	0.72821
143	3.96195	3.19539	3.34917	3.98225	3.34917	3.98225	3.85958	3.96195	1.1353	3.79081	3.58504	3.96195	5.26176	6.9828	4.64599	6.42523	3.20027	5.58819	0.844216	1.82386	3.34743	1.82386	1.82386		0.273201	0.369211	0.115501	0.405058	0.0782167	0.117675	-0.00106171	0.110783	1.24962	0.0334967	0.0090301	0.95178	0.619674	-0.0715057	0.446058	0.00732058	0.0334967	0.00732058	0.530863	0.549407	0.0635578	0.121028	-0.0920165	1.0566	0.783866
144	3.97027	3.24499	3.30726	3.99671	3.30726	3.99671	3.74604	3.97027	1.08965	4.13856	3.54248	3.97027	5.34165	6.56436	4.82329	6.13332	3.18862	5.57667	0.810743	1.41591	3.42243	1.41591	1.41591		0.288087	0.316854	0.109041	0.455322	0.0482555	0.199849	0.0127557	0.197081	1.31961	-0.017093	0.00539146	1.06396	0.64555	0.0685093	0.475301	0.0103696	-0.017093	0.0103696	0.602846	0.549015	0.0139208	0.0677143	-0.100288	1.10886	0.839386
145	3.87097	3.24525	3.32093	4.16083	3.32093	4.16083	3.7503	3.87097	1.13139	4.46956	3.59966	3.87097	5.32143	6.28077	4.70924	6.79408	3.14898	5.70154	0.72797	1.30989	3.31762	1.30989	1.30989		0.298999	0.505779	0.121571	0.400125	0.0484052	0.128042	0.0595699	0.142611	1.30086	0.0459018	-0.0143442	1.02022	0.600267	0.1071	0.322403	0.0269003	0.0459018	0.0269003	0.590525	0.444955	0.0437235	0.139371	-0.0503137	1.10101	0.774043
146	3.74546	3.22119	3.26149	3.91767	3.26149	3.91767	3.87868	3.74546	1.13379	3.99601	3.5879	3.74546	5.45194	7.10003	4.72376	6.47858	3.13927	5.59546	0.780406	1.75637	2.72548	1.75637	1.75637		0.282198	0.370843	0.120143	0.484261	0.0704931	0.164927	-0.0096014	0.101549	1.22596	-0.0309448	0.022062	1.00206	0.666104	0.107665	0.312242	-0.0163362	-0.0309448	-0.0163362	0.565503	0.509459	-0.00120196	0.141254	-0.0646498	1.02273	0.750845
147	3.94505	3.32369	3.39672	3.98933	3.39672	3.98933	3.8152	3.94505	1.07103	3.92389	3.72212	3.94505	5.46582	6.61853	4.66614	6.703	3.21052	5.65986	0.756908	1.76465	3.50015	1.76465	1.76465		0.24762	0.338687	0.0661667	0.43286	0.0748812	0.184569	0.0111668	0.136865	1.23103	-0.0134447	0.0227145	0.972305	0.537597	0.0505448	0.287554	0.00592128	-0.0134447	0.00592128	0.575265	0.595814	0.110731	0.0568607	-0.0884297	1.0221	0.774689
148	3.82919	3.27804	3.33752	4.00969	3.33752	4.00969	3.81432	3.82919	1.0075	3.86963	3.61481	3.82919	6.01702	6.91798	4.8764	7.31169	3.19064	5.45579	0.79991	1.31386	3.27944	1.31386	1.31386		0.318365	0.407917	0.116397	0.488684	-0.0284663	0.169035	-0.0427269	0.107008	1.38838	0.0627259	-0.0321221	1.15476	0.508207	0.0808351	0.476655	-0.0197285	0.0627259	-0.0197285	0.563214	0.470542	0.0318139	0.108176	-0.103724	1.0265	0.821409
149	4.019	3.32458	3.36034	3.91993	3.36034	3.91993	3.6222	4.019	1.09525	3.89607	3.5997	4.019	5.86121	6.53478	4.59734	6.8527	3.14616	5.69775	0.781726	1.40944	3.17697	1.40944	1.40944		0.273989	0.372468	0.12412	0.374191	-0.0546107	0.208572	0.0115999	0.129498	1.32256	0.0351973	-0.0226399	0.959908	0.641519	0.159759	0.386497	0.0304029	0.0351973	0.0304029	0.542617	0.530982	0.0591423	0.094498	-0.118915	0.982608	0.786961
150	3.9708	3.25933	3.32059	4.07245	3.32059	4.07245	3.37098	3.9708	1.06032	4.25334	3.67495	3.9708	5.79147	6.75643	4.70321	6.58952	3.18593	5.88245	0.771496	1.60458	2.90681	1.60458	1.60458		0.23876	0.40918	0.101679	0.469693	0.0268282	0.181416	-0.0162891	0.111604	1.22851	0.0204326	-0.0632483	1.01001	0.675597	-0.0681739	0.418556	0.0208863	0.0204326	0.0208863	0.527544	0.508111	0.0465504	0.0854477	-0.00889614	1.0644	0.880077
151	3.9507	3.29691	3.24306	4.09276	3.24306	4.09276	3.47965	3.9507	1.17608	4.08602	3.68343	3.9507	5.59081	6.40495	4.76835	6.82891	3.24471	5.95153	0.783555	1.72974	2.69546	1.72974	1.72974		0.26101	0.37662	0.169358	0.406324	-0.10068	0.15588	0.00361748	0.154029	1.3455	-0.014168	-0.0150363	1.04302	0.425823	0.154533	0.375238	0.0137514	-0.014168	0.0137514	0.5334	0.464328	-0.052383	0.0199129	-0.0539234	0.869892	0.795599
152	3.75367	3.25683	3.36621	4.08617	3.36621	4.08617	3.67922	3.75367	1.06891	4.25611	3.60682	3.75367	5.5094	6.69513	4.88783	6.7167	3.20447	5.53613	0.770446	1.36419	2.98166	1.36419	1.36419		0.268381	0.411346	0.0694061	0.497321	0.0753314	0.158298	0.000139857	0.121967	1.51861	0.0398544	-0.0383711	1.13216	0.738174	0.201093	0.365087	-0.00401217	0.0398544	-0.00401217	0.4859	0.490434	0.0883998	0.0744218	-0.0719411	0.933667	0.877091
153	3.8841	3.25659	3.32901	4.07373	3.32901	4.07373	3.70012	3.8841	0.986927	4.0911	3.69462	3.8841	5.58602	6.42331	4.7303	6.95304	3.24886	5.8488	0.755269	1.80757	3.35542	1.80757	1.80757		0.2768	0.377428	0.0999332	0.331206	-0.0314711	0.226322	0.0435461	-0.0451483	1.27422	0.00275086	0.0179289	0.970375	0.559509	0.142156	0.414682	0.0467479	0.00275086	0.0467479	0.528304	0.552569	0.0462327	0.0199829	-0.19491	0.929289	0.74137
154	3.84849	3.29398	3.32323	4.09659	3.32323	4.09659	3.59074	3.84849	1.08453	4.23747	3.70318	3.84849	6.10173	6.28995	4.70071	6.70959	3.22631	5.64879	0.762412	1.55227	3.37984	1.55227	1.55227		0.253033	0.414828	0.151711	0.419115	-0.0665415	0.182222	0.0572437	0.101908	1.42037	0.0384958	-0.0335064	1.00284	0.549292	0.109688	0.336038	0.08586	0.0384958	0.08586	0.514199	0.461284	0.0259783	0.00914056	-0.0641511	1.07447	0.880132
155	3.7161	3.23155	3.34278	4.0479	3.34278	4.0479	3.7375	3.7161	1.10119	4.35813	3.72147	3.7161	5.4666	7.00293	4.77542	6.58248	3.19513	5.78213	0.735495	1.27757	3.32828	1.27757	1.27757		0.249159	0.352423	0.130014	0.396862	-0.0650387	0.145643	0.0680907	0.12919	1.32872	0.0543336	-0.0358794	0.970505	0.60662	0.240939	0.425197	0.0105167	0.0543336	0.0105167	0.53611	0.437165	0.0652727	0.00532794	-0.0811864	1.02539	0.884411
156	3.93831	3.30725	3.35231	3.92741	3.35231	3.92741	3.39604	3.93831	1.06305	4.4254	3.66757	3.93831	5.58671	6.92967	4.75537	6.77563	3.20999	5.583	0.840604	1.48719	2.70775	1.48719	1.48719		0.343751	0.372288	0.145691	0.466501	-0.0840317	0.184959	0.0487692	0.0908794	1.31163	0.0742486	-0.0578991	1.11866	0.561151	0.202862	0.455002	0.0537812	0.0742486	0.0537812	0.533864	0.509004	-0.0412798	0.111909	-0.0412659	1.08413	0.842858
157	3.90678	3.35087	3.32472	4.11125	3.32472	4.11125	3.85159	3.90678	1.13119	4.39261	3.70589	3.90678	5.81296	7.20872	4.50896	6.96421	3.23612	5.54985	0.725981	1.91428	3.12927	1.91428	1.91428		0.270852	0.350575	0.102644	0.415749	-0.134999	0.166695	0.0208852	0.144498	1.40093	-0.0517252	-0.0850702	0.987236	0.52454	0.17152	0.4972	0.0581455	-0.0517252	0.0581455	0.548349	0.432846	0.0355724	0.0651992	-0.157023	0.939849	0.879701
158	3.71396	3.3	3.29562	4.01741	3.29562	4.01741	3.60157	3.71396	1.05713	4.09659	3.69829	3.71396	5.41707	6.5396	4.64508	6.59288	3.20906	5.59837	0.765165	2.28111	3.04997	2.28111	2.28111		0.309253	0.437383	0.113762	0.47241	-0.0354082	0.159539	0.0246571	0.0155293	1.42171	0.000486053	-0.0205141	0.996817	0.60941	0.179313	0.494311	0.0904379	0.000486053	0.0904379	0.416502	0.463434	-0.00174713	0.0798542	-0.127766	1.01864	0.809971
159	3.72936	3.27864	3.31773	4.04987	3.31773	4.04987	3.66817	3.72936	1.03812	4.37927	3.71839	3.72936	5.63219	6.46569	4.62212	6.67439	3.25446	5.92439	0.729338	1.46599	3.51402	1.46599	1.46599		0.315381	0.424412	0.117925	0.466419	-0.0571653	0.172194	0.00233734	0.109121	1.33689	-0.0334951	-0.0175676	1.12317	0.676488	0.143668	0.474607	0.0134274	-0.0334951	0.0134274	0.409498	0.448463	0.0592434	0.0806472	-0.202763	1.11591	0.919397
160	3.67842	3.35175	3.32988	4.22329	3.32988	4.22329	3.70543	3.67842	1.06542	4.28337	3.69687	3.67842	5.68351	7.18961	4.65272	6.96123	3.23612	5.9421	0.776794	2.22888	3.05475	2.22888	2.22888		0.21065	0.48845	0.102853	0.432709	0.00443995	0.188612	-0.0139033	0.166352	1.296	-0.0751689	-0.00531681	0.884227	0.497235	0.253136	0.519315	-0.0368703	-0.0751689	-0.0368703	0.531409	0.456874	0.0300653	0.0747314	-0.127456	1.03183	0.907528
161	3.86129	3.26482	3.32943	3.94639	3.32943	3.94639	3.50833	3.86129	1.03997	4.39052	3.702	3.86129	5.75427	6.72722	4.60861	6.94658	3.20605	5.81028	0.817155	2.02366	3.08456	2.02366	2.02366		0.321755	0.375571	0.142984	0.534282	-0.107892	0.207584	0.0460284	0.121977	1.43557	0.069965	-0.0469535	0.996447	0.623144	0.256725	0.499003	0.0766043	0.069965	0.0766043	0.50248	0.447407	-0.0572089	0.0246797	-0.088707	1.0874	0.918133
162	3.80771	3.33559	3.39136	4.09595	3.39136	4.09595	3.61919	3.80771	1.05602	4.51633	3.79586	3.80771	5.59167	6.62168	4.77504	6.8277	3.20253	6.05799	0.771242	1.66768	3.47611	1.66768	1.66768		0.317369	0.405845	0.104697	0.356535	0.0415239	0.212556	-0.0331696	0.103684	1.39147	0.000191527	-0.00767995	1.21265	0.640932	0.256031	0.294451	0.0177356	0.000191527	0.0177356	0.419115	0.418412	-0.0209797	0.0807495	-0.0520951	1.05354	0.981161
163	3.72388	3.27824	3.35699	3.95707	3.35699	3.95707	3.66165	3.72388	1.04464	4.18614	3.69734	3.72388	5.68052	6.5983	4.73781	6.93136	3.25671	5.82451	0.816296	2.13476	2.71455	2.13476	2.13476		0.333758	0.377763	0.12005	0.537091	-0.0162351	0.157388	0.0216683	0.167224	1.33339	-0.0738892	-0.0727701	0.998918	0.564831	0.218952	0.481395	0.0690526	-0.0738892	0.0690526	0.494038	0.417528	0.0273178	0.081956	-0.0914619	0.988935	0.942192
164	3.85581	3.34212	3.30514	4.18807	3.30514	4.18807	3.59216	3.85581	1.04082	4.20479	3.6054	3.85581	6.05041	6.59683	4.4166	6.92107	3.26871	5.93192	0.793006	1.55701	2.42612	1.55701	1.55701		0.304686	0.392977	0.162019	0.515	-0.0249802	0.149536	0.00713635	0.0934748	1.39495	0.00759757	-0.0232925	1.19657	0.723783	0.302158	0.460436	0.110981	0.00759757	0.110981	0.360421	0.472647	0.0581651	0.0855514	-0.147208	1.08335	0.887236
165	3.78363	3.32161	3.31415	4.15325	3.31415	4.15325	3.52808	3.78363	0.969367	4.68128	3.80874	3.78363	5.98035	6.66323	4.81208	7.5833	3.26729	6.0461	0.754665	1.77042	3.04306	1.77042	1.77042		0.276951	0.390442	0.0948656	0.501708	-0.0331842	0.223332	-0.00586574	0.148859	1.35368	-0.00564935	-0.0867017	0.949201	0.656681	0.248576	0.346323	0.0926901	-0.00564935	0.0926901	0.446033	0.397628	-0.0071856	0.0671398	-0.124409	1.08111	0.943673
166	3.84282	3.34221	3.36181	4.25319	3.36181	4.25319	3.50296	3.84282	1.01578	4.59347	3.66984	3.84282	5.91163	7.08843	4.53583	7.25276	3.26671	6.25105	0.770987	1.43642	2.88082	1.43642	1.43642		0.283513	0.400533	0.119363	0.581969	-0.0161754	0.187188	0.0396171	0.070328	1.47501	-0.0245385	-0.0493167	1.16003	0.797028	0.275098	0.541614	0.117867	-0.0245385	0.117867	0.371809	0.473732	0.0142614	0.116607	-0.121266	1.05534	0.916033
167	3.88306	3.31532	3.3316	4.23878	3.3316	4.23878	3.40879	3.88306	0.965567	4.52719	3.69768	3.88306	5.75537	7.09215	4.91034	6.87268	3.31166	6.21176	0.742909	1.46573	2.86069	1.46573	1.46573		0.360712	0.392539	0.139906	0.565253	-0.157687	0.231197	0.080103	0.132207	1.38403	-0.0125713	-0.0233716	0.995105	0.660175	0.326935	0.52135	0.0569038	-0.0125713	0.0569038	0.359162	0.350346	-0.0308915	0.0626042	-0.0508364	1.09861	0.977528
168	3.82628	3.29958	3.35827	4.14873	3.35827	4.14873	3.51495	3.82628	1.04378	4.4735	3.71392	3.82628	5.65351	7.16828	4.85234	7.12311	3.27651	5.7987	0.736879	1.7175	3.00341	1.7175	1.7175		0.232806	0.421077	0.0960223	0.583071	-0.125502	0.232574	0.00962364	0.167716	1.40045	-0.00638059	-0.0921794	1.0725	0.622957	0.283504	0.425697	0.120322	-0.00638059	0.120322	0.459965	0.411342	0.0235594	0.0897199	-0.0129806	1.00685	1.01249
169	3.75464	3.34109	3.26193	4.15438	3.26193	4.15438	3.24955	3.75464	1.09711	4.48827	3.76237	3.75464	5.86154	7.07851	4.44473	6.99611	3.29454	6.15426	0.759994	1.93669	2.84329	1.93669	1.93669		0.303342	0.429733	0.128001	0.498842	0.0571806	0.187091	0.0327359	0.156646	1.32751	0.0221727	-0.0314596	1.18296	0.841346	0.306282	0.362468	0.117737	0.0221727	0.117737	0.520125	0.403059	0.120586	0.100964	-0.0689717	0.997964	1.11591
170	3.78276	3.3069	3.32823	4.23544	3.32823	4.23544	3.44179	3.78276	1.04905	4.22944	3.76168	3.78276	5.87463	7.04448	4.53027	6.94854	3.32833	6.04471	0.788105	2.21759	2.69138	2.21759	2.21759		0.29772	0.42638	0.133069	0.591325	0.0515606	0.193454	0.014713	0.172775	1.35662	0.0110867	-0.0196934	1.10427	0.639831	0.254699	0.495201	0.149639	0.0110867	0.149639	0.44035	0.386684	0.121961	0.082955	-0.0697797	0.91725	0.973437
171	3.6987	3.40276	3.33697	4.20908	3.33697	4.20908	3.63243	3.6987	1.07726	4.1583	3.71575	3.6987	5.96156	6.51345	4.44461	7.13706	3.27793	6.07324	0.744722	1.42522	3.27269	1.42522	1.42522		0.327854	0.436635	0.0877974	0.562699	-0.108553	0.179753	0.0056578	0.0601807	1.35389	-0.0091058	-0.0492771	1.18181	0.847159	0.290448	0.532365	0.107793	-0.0091058	0.107793	0.39399	0.412098	0.00469021	0.0820022	-0.0307769	1.0592	0.958824
172	3.73854	3.28575	3.24584	4.22929	3.24584	4.22929	3.66494	3.73854	0.987287	4.37476	3.72337	3.73854	5.98882	6.52384	4.57233	6.92659	3.267	5.70515	0.838027	1.58683	2.8007	1.58683	1.58683		0.277544	0.455976	0.10878	0.51435	0.0116822	0.195683	0.0323581	0.147094	1.5273	0.0240798	-0.0654532	1.01257	0.609196	0.387231	0.501353	0.0650579	0.0240798	0.0650579	0.335323	0.393856	0.0206987	0.0854589	-0.0104083	1.12588	1.01195
173	3.8358	3.27106	3.34969	4.31974	3.34969	4.31974	3.22039	3.8358	0.930806	4.67696	3.73351	3.8358	5.82618	6.76951	4.64975	7.22643	3.30942	5.81085	0.760615	1.23033	3.34944	1.23033	1.23033		0.321531	0.46586	0.0934537	0.540272	0.0690508	0.211191	0.0557423	0.0105222	1.39333	-0.0471076	-0.0264367	1.06829	0.961792	0.335188	0.479896	0.154496	-0.0471076	0.154496	0.323853	0.488584	-0.00220084	0.0482588	-0.0920794	1.10701	0.952203
174	3.75651	3.36138	3.33645	4.2404	3.33645	4.2404	3.20567	3.75651	1.00604	4.37644	3.76464	3.75651	6.05029	6.98076	4.68306	7.20531	3.27383	5.9607	0.823105	1.58519	3.35395	1.58519	1.58519		0.33693	0.39896	0.100334	0.556059	0.0704636	0.220804	0.0388067	0.103355	1.42339	-0.0413469	-0.0746091	1.26844	0.814723	0.452781	0.557125	0.111575	-0.0413469	0.111575	0.338738	0.437538	0.00866406	-0.00998281	-0.0373071	1.0964	0.964233
175	3.58066	3.3565	3.34482	4.22501	3.34482	4.22501	3.32665	3.58066	1.00228	4.45998	3.79785	3.58066	5.8827	7.4198	4.80924	7.55977	3.28573	6.01213	0.75772	1.38858	2.54121	1.38858	1.38858		0.259247	0.393021	0.0851031	0.547991	-0.0871871	0.136297	0.0330447	0.0876366	1.37653	-0.00128675	0.00694382	1.30292	0.810902	0.408399	0.607315	0.0870929	-0.00128675	0.0870929	0.309616	0.456638	0.0569616	-0.0111766	-0.0777193	1.02774	0.976748
176	3.72912	3.33452	3.34569	4.00148	3.34569	4.00148	3.15078	3.72912	1.02614	4.62049	3.77277	3.72912	6.02942	6.80039	4.56368	7.39053	3.31973	6.00068	0.774122	2.73139	2.94685	2.73139	2.73139		0.295566	0.443245	0.113944	0.642518	-0.0839408	0.196509	0.00952221	0.150079	1.52648	0.00302846	-0.0967178	1.13845	0.86462	0.358839	0.470612	0.105802	0.00302846	0.105802	0.298996	0.370374	-0.00885361	0.0429988	-0.0515565	1.07981	1.05191
177	3.87374	3.28293	3.26581	4.14976	3.26581	4.14976	3.60556	3.87374	0.955161	4.69439	3.70622	3.87374	5.86853	6.84296	4.67387	7.22111	3.32707	5.99436	0.798605	1.5102	2.7679	1.5102	1.5102		0.284684	0.449391	0.146789	0.644723	-0.0701176	0.194403	0.0046173	0.0671168	1.36433	-0.030165	-0.0739961	1.20756	0.901791	0.357969	0.442877	0.244035	-0.030165	0.244035	0.312921	0.383322	0.0301339	0.0625804	-0.0874403	1.10177	1.07414
178	3.8014	3.31832	3.2641	4.10269	3.2641	4.10269	3.44387	3.8014	0.936317	4.48943	3.78658	3.8014	5.87782	6.71145	4.53112	6.75165	3.3662	6.01225	0.73454	1.60338	2.75833	1.60338	1.60338		0.31593	0.37007	0.154921	0.566785	0.0154393	0.214935	0.0285076	0.159868	1.41836	-0.0870729	-0.0764482	1.07501	0.876479	0.260977	0.383317	0.137464	-0.0870729	0.137464	0.302626	0.434814	0.0684282	0.0546104	-0.0644992	1.04668	1.14441
179	3.70621	3.36931	3.32702	4.16938	3.32702	4.16938	3.14274	3.70621	0.945046	4.61916	3.75196	3.70621	6.1409	6.59237	4.61739	7.37132	3.32827	6.20607	0.798176	2.04658	2.97589	2.04658	2.04658		0.368155	0.441397	0.118622	0.480326	-0.0370608	0.184725	0.0169055	0.116898	1.38915	-0.0358321	-0.0798792	1.20238	0.776941	0.42403	0.516829	0.153412	-0.0358321	0.153412	0.280141	0.350573	-0.00464147	0.0653365	-0.120039	1.11332	1.04616
180	3.82799	3.36946	3.28753	4.22275	3.28753	4.22275	3.27204	3.82799	0.873163	4.91743	3.80408	3.82799	5.98915	6.59728	4.82259	7.37512	3.29143	6.11878	0.872326	2.90265	2.52881	2.90265	2.90265		0.281887	0.457505	0.107842	0.585451	-0.146839	0.19686	0.0131609	0.154163	1.43834	0.00526167	-0.00491142	1.07436	0.764331	0.478664	0.4749	0.232953	0.00526167	0.232953	0.333462	0.396799	0.0458235	0.0622133	-0.0936543	1.08071	1.08413
181	3.73534	3.39805	3.361	4.23234	3.361	4.23234	3.11587	3.73534	0.94152	4.8549	3.81235	3.73534	6.1567	7.28644	4.78316	7.20462	3.29908	6.11669	0.845902	2.21897	2.88294	2.21897	2.21897		0.361211	0.46317	0.126811	0.586972	0.0310354	0.196041	-0.00203366	0.124953	1.44603	0.0378672	-0.0767745	1.11758	0.912642	0.41442	0.487159	0.123343	0.0378672	0.123343	0.302757	0.443115	0.13001	0.00877345	-0.041226	1.08926	1.13077
182	3.81302	3.35464	3.35414	4.21665	3.35414	4.21665	3.42646	3.81302	1.03512	4.74791	3.77622	3.81302	5.91654	7.30192	4.91994	6.85206	3.31569	6.00517	0.836802	1.74551	3.16799	1.74551	1.74551		0.368249	0.314825	0.191125	0.729522	0.0274593	0.187617	0.00329034	0.193408	1.42147	-0.0163302	-0.000531212	1.20253	0.824239	0.601712	0.486318	0.186983	-0.0163302	0.186983	0.358617	0.423333	0.0592205	0.0468114	-0.0204544	1.14158	1.06782
183	3.84071	3.39958	3.26871	4.29377	3.26871	4.29377	3.31379	3.84071	0.989563	4.62696	3.77751	3.84071	6.16448	7.71878	4.66971	7.29799	3.32024	6.19911	0.829946	2.25233	2.73402	2.25233	2.25233		0.403579	0.391293	0.148167	0.655728	0.221562	0.240335	0.0518322	0.0573393	1.48432	-0.0107669	-0.119182	1.19406	0.853018	0.463493	0.441854	0.176039	-0.0107669	0.176039	0.29056	0.413747	0.103715	0.0612478	-0.120593	1.09746	1.09791
184	3.75167	3.35017	3.32634	4.2467	3.32634	4.2467	3.28687	3.75167	0.97089	4.69607	3.77928	3.75167	5.93746	6.30637	4.65745	7.12317	3.34303	5.9533	0.777176	2.10614	2.57808	2.10614	2.10614		0.323077	0.386109	0.17364	0.573843	-0.0550617	0.232211	0.0674877	0.0917105	1.42884	-0.0635819	-0.0679548	1.19078	0.945175	0.537752	0.532121	0.0824607	-0.0635819	0.0824607	0.294252	0.449139	0.0386833	-0.0103723	-0.115519	1.15258	1.09191
185	3.81716	3.35538	3.27816	4.34182	3.27816	4.34182	3.21098	3.81716	0.89507	4.67909	3.83352	3.81716	6.14094	7.18721	4.67653	7.02764	3.31318	6.0523	0.819016	1.78878	2.83584	1.78878	1.78878		0.41431	0.449219	0.121574	0.598151	-0.00280233	0.203079	0.0670223	0.196486	1.34787	-0.0461541	-0.0847835	1.21211	1.03119	0.48412	0.504253	0.218275	-0.0461541	0.218275	0.309519	0.420709	0.0727775	0.0646485	-0.111094	1.10402	1.0331
186	3.85694	3.38925	3.30067	4.15837	3.30067	4.15837	3.3365	3.85694	0.968956	4.64058	3.79347	3.85694	6.02913	6.96361	4.93396	7.09944	3.32839	6.36851	0.875381	1.13802	2.90061	1.13802	1.13802		0.296094	0.415206	0.115504	0.657701	-0.0670825	0.22146	0.0278355	0.161448	1.43729	-0.0575187	-0.0892824	1.22598	0.861573	0.467285	0.524493	0.199892	-0.0575187	0.199892	0.332467	0.465668	0.0691322	0.0741233	-0.0734373	1.20426	1.05851
187	4.01346	3.39757	3.29915	4.2589	3.29915	4.2589	3.4709	4.01346	0.950745	4.48787	3.75458	4.01346	6.04202	6.61157	4.65424	6.96561	3.3547	5.95539	0.826366	1.66501	3.01434	1.66501	1.66501		0.31278	0.401556	0.10764	0.510449	0.0165811	0.18765	0.0486633	0.105161	1.47075	-0.043421	-0.062309	1.29345	0.837269	0.556356	0.455282	0.116874	-0.043421	0.116874	0.247941	0.442879	0.0106402	0.0704256	-0.0869974	1.1364	1.16258
188	3.78473	3.37281	3.28085	4.13535	3.28085	4.13535	3.39369	3.78473	1.00367	4.22754	3.78787	3.78473	5.97646	6.53784	4.94668	6.85885	3.3123	6.14136	0.855129	1.67578	2.65167	1.67578	1.67578		0.326473	0.403086	0.11003	0.704007	-0.0522067	0.163803	0.059653	0.0834921	1.48443	-0.0227906	-0.113715	1.26087	1.13272	0.416571	0.501768	0.238652	-0.0227906	0.238652	0.28552	0.410276	0.122028	0.123383	-0.116651	1.12806	1.23215
189	3.84853	3.34339	3.31826	4.34442	3.31826	4.34442	3.37043	3.84853	0.973371	4.28613	3.74965	3.84853	6.06102	7.00673	4.59841	7.26139	3.39327	6.23606	0.754888	1.788	2.70481	1.788	1.788		0.386633	0.357898	0.163401	0.504228	-0.0449947	0.175184	0.026085	0.111451	1.47751	-0.050168	-0.0770217	1.22043	0.903083	0.586518	0.486927	0.181793	-0.050168	0.181793	0.268152	0.318099	0.0394548	0.0915457	-0.127774	1.03441	1.18214
190	3.79115	3.33049	3.32959	4.31605	3.32959	4.31605	3.35648	3.79115	0.927143	4.7004	3.83218	3.79115	5.76204	6.94274	4.74539	7.31226	3.3469	6.05476	0.767058	1.47486	2.80032	1.47486	1.47486		0.327052	0.371755	0.134894	0.578416	-0.0743551	0.234979	0.0415242	0.197625	1.61791	-0.0312066	-0.0203064	1.13817	1.00588	0.659292	0.379747	0.191513	-0.0312066	0.191513	0.291812	0.431926	0.0321882	-3.58003e-05	-0.0481363	1.06675	1.03337
191	3.78657	3.36747	3.35621	4.29381	3.35621	4.29381	3.53208	3.78657	0.921599	4.39878	3.79734	3.78657	5.86211	6.69336	4.53908	7.13782	3.36334	6.26035	0.819064	1.79016	2.56856	1.79016	1.79016		0.316314	0.442919	0.116678	0.723218	0.0432969	0.215201	0.0640741	0.0717541	1.47879	-0.0190238	-0.0440466	1.28591	0.883415	0.651682	0.435213	0.166949	-0.0190238	0.166949	0.215458	0.389674	0.047879	-0.0341925	-0.0827862	1.12441	1.30562
192	3.79873	3.42567	3.38905	4.1686	3.38905	4.1686	3.68245	3.79873	1.05672	4.4877	3.80574	3.79873	6.18175	7.25156	4.94912	7.40576	3.33416	6.30355	0.771194	1.47745	3.44979	1.47745	1.47745		0.287856	0.377136	0.135876	0.656343	-0.0378719	0.236234	0.100327	0.234099	1.44993	0.0334572	-0.0422075	1.16478	1.02278	0.673001	0.53446	0.202949	0.0334572	0.202949	0.241345	0.310454	0.145212	0.0961514	-0.0812901	1.08667	1.12041
193	3.79966	3.35718	3.33982	4.27699	3.33982	4.27699	3.25962	3.79966	0.94455	4.63002	3.8307	3.79966	5.79282	6.28188	4.52339	7.41235	3.32718	6.05268	0.717216	1.76577	2.88435	1.76577	1.76577		0.423805	0.428753	0.142531	0.698412	0.0930319	0.213862	0.0820006	0.210696	1.37129	-0.0115703	-0.0553679	1.19657	0.970605	0.629337	0.341156	0.269657	-0.0115703	0.269657	0.239374	0.368424	0.0601411	0.168726	-0.0690904	1.07921	1.08835
194	3.73313	3.36108	3.34309	4.25221	3.34309	4.25221	3.26488	3.73313	0.980218	4.25005	3.79157	3.73313	5.9632	6.74724	4.76459	7.17113	3.30721	6.03161	0.729338	2.26353	3.13862	2.26353	2.26353		0.375837	0.40165	0.105907	0.794575	-0.0150335	0.18039	0.0827006	0.125743	1.50246	0.0180008	-0.0465778	1.3449	0.941495	0.60161	0.479166	0.296935	0.0180008	0.296935	0.261134	0.464246	0.0849025	0.0766034	-0.0744816	1.09501	1.11201
195	3.73477	3.34822	3.31917	4.34565	3.31917	4.34565	3.71172	3.73477	0.972242	4.27395	3.76447	3.73477	5.68044	6.74345	4.81517	7.15622	3.37841	6.22644	0.691618	1.82205	3.16566	1.82205	1.82205		0.402372	0.405673	0.175286	0.557417	0.0863307	0.19515	0.0939851	0.179136	1.50837	0.0461805	-0.0618245	1.2213	1.11437	0.582827	0.478141	0.298205	0.0461805	0.298205	0.28953	0.2832	0.0731855	0.0733653	-0.172397	1.1145	1.13039
196	3.66045	3.42449	3.39274	4.3908	3.39274	4.3908	3.5648	3.66045	1.01544	4.31772	3.81004	3.66045	6.08356	6.27084	4.58509	7.18978	3.36783	6.205	0.752883	2.32706	2.77214	2.32706	2.32706		0.336692	0.378537	0.155278	0.650922	0.0872924	0.242727	0.0922256	0.12404	1.52573	0.0395046	-0.0525499	1.26731	1.12351	0.546131	0.466017	0.23476	0.0395046	0.23476	0.230932	0.403223	0.116909	0.0738361	-0.0389539	1.12297	1.23126
197	3.74709	3.4755	3.37552	4.34565	3.37552	4.34565	3.28222	3.74709	0.980132	4.4952	3.76885	3.74709	6.37676	6.56706	4.82474	7.3148	3.34438	6.06356	0.779085	2.71923	2.8069	2.71923	2.71923		0.34657	0.358156	0.118291	0.54892	-0.0310806	0.240952	0.0890707	0.162053	1.47511	-0.0311186	-0.0284835	1.30095	1.28249	0.555152	0.478055	0.298123	-0.0311186	0.298123	0.293969	0.365827	0.108767	0.00460352	-0.0851532	1.03978	1.13631
198	3.8494	3.41628	3.39973	4.28565	3.39973	4.28565	3.43183	3.8494	0.841226	4.49347	3.8261	3.8494	5.95727	6.1999	4.68388	6.70662	3.35824	6.0399	0.728097	1.6157	2.51559	1.6157	1.6157		0.331034	0.411862	0.117749	0.585799	0.0273398	0.237572	0.161102	0.229636	1.47245	0.0314621	0.0153186	1.17657	1.21285	0.72179	0.530805	0.261205	0.0314621	0.261205	0.246883	0.364315	0.0823138	-0.0414394	-0.0873615	0.949178	1.18212
199	3.69275	3.37861	3.4045	4.20597	3.4045	4.20597	3.37825	3.69275	0.941024	4.69947	3.76064	3.69275	6.01816	6.26157	4.89626	6.97766	3.37898	6.00834	0.748015	3.47885	2.67729	3.47885	3.47885		0.317708	0.410977	0.141264	0.552565	-0.106359	0.228428	0.118769	0.0550406	1.47437	0.0644096	-0.0501373	1.19687	1.09639	0.80274	0.567324	0.30597	0.0644096	0.30597	0.308136	0.352642	0.12456	0.0951873	-0.0955145	1.04036	1.08803
200	3.71523	3.33671	3.36144	4.31683	3.36144	4.31683	3.20654	3.71523	0.939757	4.4015	3.70928	3.71523	5.76233	6.05393	4.95417	6.70186	3.38501	6.07387	0.754967	2.43635	2.96126	2.43635	2.43635		0.411043	0.444483	0.133476	0.641774	-0.0121785	0.222344	0.117433	0.208018	1.47812	0.0506063	-0.0281967	1.24871	1.24862	0.590874	0.435761	0.323928	0.0506063	0.323928	0.244947	0.385601	0.0991166	0.0756044	-0.0589665	1.06342	1.08192
201	3.76399	3.38062	3.35409	4.29465	3.35409	4.29465	3.43621	3.76399	1.01635	4.39491	3.74296	3.76399	5.84455	6.55936	4.74245	7.01217	3.31242	6.11214	0.840159	2.51659	2.80973	2.51659	2.51659		0.431024	0.344911	0.134358	0.738437	0.235416	0.256935	0.0798589	0.224434	1.42995	-0.0117362	-0.0681525	1.29824	1.35545	0.743317	0.493263	0.372892	-0.0117362	0.372892	0.273426	0.345616	0.072153	0.0411156	-0.0963065	1.03213	1.13752
202	3.72087	3.39877	3.32375	4.25093	3.32375	4.25093	3.43943	3.72087	0.96543	4.72216	3.8831	3.72087	5.85896	6.5627	4.82408	6.63557	3.33488	6.24466	0.749479	1.98375	2.97801	1.98375	1.98375		0.357641	0.401994	0.111766	0.729231	-0.0809663	0.191224	0.0909683	0.186123	1.46783	-0.0332254	-0.043394	1.30652	1.28926	0.750592	0.423565	0.310149	-0.0332254	0.310149	0.233816	0.321151	0.0725609	0.0275858	-0.0794688	1.09462	1.09718
203	3.76559	3.35972	3.29538	3.94359	3.29538	3.94359	3.39867	3.76559	0.983692	4.57545	3.74152	3.76559	5.73569	6.75049	4.67552	6.9918	3.35608	6.03376	0.844645	2.7207	2.47871	2.7207	2.7207		0.333938	0.38868	0.133998	0.574516	-0.0410576	0.270655	0.0536652	0.199954	1.5124	-0.00707233	-0.0226399	1.32882	1.25933	0.504672	0.51477	0.382564	-0.00707233	0.382564	0.224254	0.34281	0.182838	0.0339023	-0.0962277	1.15452	1.21258
204	3.81693	3.45693	3.3316	4.4031	3.3316	4.4031	3.45952	3.81693	0.986721	4.47326	3.73779	3.81693	6.26785	6.40486	4.66769	7.06139	3.34731	6.1086	0.737085	1.95936	2.36069	1.95936	1.95936		0.362208	0.442978	0.136689	0.695127	-0.00490594	0.201143	0.0490178	0.144509	1.5002	-0.0279002	-0.0717121	1.28519	1.21613	0.569835	0.491765	0.238967	-0.0279002	0.238967	0.21895	0.34487	0.102319	-0.0210073	-0.0302303	1.03138	1.12234
205	3.60237	3.39352	3.3288	4.31846	3.3288	4.31846	3.32654	3.60237	0.988176	4.70484	3.82362	3.60237	5.81214	6.50631	4.56557	7.11759	3.3299	6.57157	0.72719	1.99495	2.69589	1.99495	1.99495		0.444718	0.39682	0.174671	0.729754	-0.0397054	0.266535	0.129663	0.0987072	1.45196	-0.0128173	-0.0689337	1.30721	1.28343	0.847379	0.397585	0.303904	-0.0128173	0.303904	0.226514	0.282125	0.133041	0.0422408	-0.118844	1.10337	1.15623
206	3.71947	3.37491	3.35053	4.43202	3.35053	4.43202	3.45393	3.71947	0.925945	4.6325	3.76932	3.71947	6.18956	6.53395	4.51451	7.07522	3.34533	6.45941	0.795901	2.62382	2.86939	2.62382	2.62382		0.36267	0.406215	0.147936	0.808853	0.0509599	0.273665	0.050736	0.154461	1.36127	0.0402674	-0.0552888	1.19462	1.33588	0.786366	0.38685	0.37454	0.0402674	0.37454	0.204493	0.283163	0.0709158	0.0629937	-0.0810128	1.06004	1.22257
207	3.66052	3.40621	3.31111	4.35883	3.31111	4.35883	3.0333	3.66052	0.85627	4.73077	3.78382	3.66052	5.80101	6.29005	4.48632	6.83107	3.32761	6.36687	0.690441	1.95643	2.47969	1.95643	1.95643		0.39206	0.406224	0.102542	0.675125	-0.0377524	0.287086	0.117461	0.192617	1.45214	-0.00844679	-0.0317958	1.2392	1.38589	0.88528	0.440076	0.372928	-0.00844679	0.372928	0.180182	0.329899	0.234496	0.0332241	-0.0505431	1.11384	1.23772
208	3.54399	3.3929	3.45315	4.37497	3.45315	4.37497	3.1354	3.54399	0.996203	4.86835	3.8145	3.54399	5.76761	6.22234	4.32696	6.8579	3.34941	6.29014	0.677077	2.33085	2.4835	2.33085	2.33085		0.381148	0.447715	0.188411	0.685015	0.0501782	0.227759	0.10479	0.145001	1.53311	0.0426914	-0.0368187	1.26536	1.28748	0.852683	0.450383	0.265356	0.0426914	0.265356	0.217236	0.284074	0.142249	0.0660609	-0.0622351	1.02591	1.14266
209	3.46313	3.41013	3.35738	4.44977	3.35738	4.44977	3.10235	3.46313	0.966371	4.83186	3.83421	3.46313	5.82556	6.2778	4.24041	6.43399	3.35714	6.10379	0.729688	2.50651	2.81598	2.50651	2.50651		0.347228	0.450912	0.12093	0.716428	0.0549264	0.256571	0.0941785	0.196147	1.45128	-0.0292431	-0.0436807	1.18942	1.4256	0.765381	0.483855	0.39311	-0.0292431	0.39311	0.228996	0.250286	0.0763531	0.0264368	-0.0351626	1.05067	1.16958
210	3.73129	3.39849	3.36906	4.57499	3.36906	4.57499	3.15609	3.73129	0.884356	4.6922	3.77739	3.73129	5.91405	6.74261	4.28234	6.29748	3.43614	6.18273	0.614667	1.8954	3.10822	1.8954	1.8954		0.372	0.416856	0.169818	0.702974	0.156741	0.274652	0.120506	0.161438	1.52706	-0.0303162	-0.0449859	1.34158	1.40129	0.742011	0.379917	0.237438	-0.0303162	0.237438	0.237577	0.231625	0.143419	0.049108	-0.0436009	1.09554	1.28417
211	3.74111	3.38634	3.34082	4.42085	3.34082	4.42085	3.25119	3.74111	0.89139	4.79127	3.7959	3.74111	5.99042	6.55073	4.21026	6.56681	3.33675	6.32417	0.714782	1.9397	2.51412	1.9397	1.9397		0.412771	0.426526	0.139922	0.652698	-0.0277746	0.246594	0.137276	0.174253	1.50655	0.0230224	0.0147847	1.03615	1.32294	0.747288	0.504925	0.327552	0.0230224	0.327552	0.190201	0.286853	0.111765	0.084621	-0.137328	1.15292	1.23901
212	3.64993	3.42233	3.29703	4.6703	3.29703	4.6703	3.13158	3.64993	0.975032	4.83175	3.75904	3.64993	6.13812	6.69912	4.47097	6.85898	3.35723	6.12852	0.664669	2.20173	2.68273	2.20173	2.20173		0.325318	0.407839	0.133565	0.717055	0.00492125	0.262005	0.0703662	0.189601	1.61227	-0.0138589	-0.0795925	1.35729	1.27037	0.859066	0.518279	0.533011	-0.0138589	0.533011	0.191895	0.301679	0.165365	0.055552	-0.084836	1.04827	1.115
213	3.52124	3.38141	3.32781	4.59579	3.32781	4.59579	3.14607	3.52124	0.893153	5.08296	3.72712	3.52124	5.90758	6.39345	4.41846	6.55844	3.3655	5.89213	0.677826	1.62182	2.81408	1.62182	1.62182		0.460645	0.429484	0.195717	0.647381	-0.00752029	0.280613	0.077312	0.121013	1.49285	-0.018332	-0.0522236	1.29228	1.40134	0.942857	0.442379	0.4041	-0.018332	0.4041	0.203559	0.268374	0.188526	0.0284237	-0.0281247	1.13699	1.19956
214	3.58554	3.44437	3.35833	4.7336	3.35833	4.7336	2.97091	3.58554	0.907205	4.92274	3.7809	3.58554	6.25075	6.40699	4.26677	6.92184	3.3681	6.22385	0.776826	2.31835	2.55796	2.31835	2.31835		0.407199	0.428968	0.142693	0.702649	-0.0317117	0.258514	0.11	0.178049	1.56033	-0.0263745	-0.0353455	1.23365	1.361	0.953775	0.537811	0.406972	-0.0263745	0.406972	0.194986	0.298964	0.0519997	0.0162264	-0.00814407	1.05453	1.18919
215	3.68343	3.46508	3.4074	4.48336	3.4074	4.48336	3.06678	3.68343	0.962503	4.98134	3.81389	3.68343	5.98415	6.07461	4.37126	6.83506	3.34451	6.21936	0.719379	2.36007	2.99395	2.36007	2.36007		0.393758	0.376774	0.196656	0.752193	-0.080395	0.261946	0.0982914	0.156718	1.4106	-0.0813517	-0.000946491	1.21989	1.55858	0.868009	0.503669	0.506881	-0.0813517	0.506881	0.182858	0.227416	0.143442	0.0613179	-0.127702	1.00066	1.18416
216	3.56219	3.43032	3.39531	4.59732	3.39531	4.59732	3.11943	3.56219	0.978541	5.04035	3.76656	3.56219	6.09883	6.42581	4.43877	6.75806	3.35542	5.99404	0.670205	1.98978	2.49149	1.98978	1.98978		0.395579	0.42846	0.135525	0.705446	-0.0455358	0.236988	0.0573178	0.196917	1.57504	-0.0305227	-0.0317958	1.15605	1.64519	0.988368	0.512663	0.365774	-0.0305227	0.365774	0.139368	0.168999	0.075241	0.0273336	-0.0678247	1.08481	1.1294
217	3.62862	3.45744	3.39583	4.59437	3.39583	4.59437	2.98366	3.62862	0.924063	4.83013	3.76612	3.62862	6.22079	6.10039	4.19984	6.68074	3.42216	6.23315	0.742829	2.35921	2.72374	2.35921	2.35921		0.437803	0.391129	0.156501	0.677273	0.118305	0.25338	0.0656173	0.118376	1.49584	0.0303653	-0.0544681	1.17689	1.62421	0.995441	0.489741	0.468527	0.0303653	0.468527	0.154047	0.206658	0.146676	0.0357168	-0.0487148	1.00415	1.23484
218	3.85337	3.41582	3.38102	4.5325	3.38102	4.5325	3.26909	3.85337	0.954528	4.8564	3.76614	3.85337	5.73438	6.21678	4.49004	6.68055	3.37588	6.21708	0.69278	1.78326	3.12938	1.78326	1.78326		0.485576	0.423897	0.10882	0.679676	0.0177229	0.257767	0.11625	0.0761255	1.56743	0.0556923	0.0692061	1.27602	1.52364	0.877003	0.450079	0.522753	0.0556923	0.522753	0.153327	0.195223	0.0931679	0.0420908	-0.12855	1.01142	1.28923
219	3.62141	3.47029	3.38434	4.53948	3.38434	4.53948	3.10394	3.62141	0.862312	4.72286	3.76143	3.62141	6.124	6.33799	4.30826	6.45688	3.42216	6.39584	0.64596	1.94893	2.354	1.94893	1.94893		0.355986	0.418163	0.169729	0.721442	-0.0606817	0.263525	0.165404	0.208829	1.51505	-0.0266533	-0.0620222	1.12871	1.66365	0.924896	0.582422	0.446734	-0.0266533	0.446734	0.155049	0.182402	0.134086	0.114068	-0.0956492	1.02108	1.23476
220	3.67849	3.44748	3.38222	4.73321	3.38222	4.73321	3.27002	3.67849	0.984753	4.6284	3.78933	3.67849	5.83256	6.09465	4.20959	6.68004	3.36264	6.26446	0.713143	2.34179	2.83866	2.34179	2.34179		0.40032	0.364225	0.145701	0.645559	-0.0108558	0.275224	0.0498287	0.101324	1.66047	0.0442881	-0.0594119	1.19293	1.73598	1.03977	0.496321	0.443758	0.0442881	0.443758	0.121508	0.219643	0.108813	0.100138	-0.139331	0.998879	1.20661
221	3.72174	3.37854	3.3159	4.36198	3.3159	4.36198	2.94558	3.72174	0.98412	4.71743	3.60578	3.72174	5.64507	6.11013	4.34859	6.62067	3.36667	6.1883	0.633504	2.17234	2.60615	2.17234	2.17234		0.3962	0.406516	0.197621	0.602005	-0.108042	0.253633	0.1187	0.206305	1.49818	0.029555	-0.0569598	1.30933	1.50932	0.936836	0.398816	0.49652	0.029555	0.49652	0.130795	0.175258	0.15107	0.0132642	-0.068869	1.06342	1.15173
222	3.80073	3.39507	3.35278	4.5082	3.35278	4.5082	3.04391	3.80073	0.849578	4.39618	3.75134	3.80073	5.83899	6.45725	4.33188	6.74918	3.33593	6.1258	0.603976	2.32257	3.26508	2.32257	2.32257		0.362446	0.392367	0.133095	0.687337	-0.0698467	0.245476	0.159324	0.236828	1.59235	0.0264326	-0.000778402	1.18803	1.77048	1.08254	0.52553	0.5709	0.0264326	0.5709	0.141671	0.0926308	0.189684	0.00737227	-0.111443	0.981634	1.18508
223	3.57722	3.42979	3.35791	4.38564	3.35791	4.38564	3.22799	3.57722	0.906024	4.42863	3.72262	3.57722	5.6247	5.82857	4.44161	6.62003	3.4108	6.36276	0.738565	2.15605	2.49721	2.15605	2.15605		0.441394	0.452185	0.130084	0.730125	0.0864804	0.272014	0.120063	0.124809	1.56158	-0.00982124	-0.0748959	1.46941	1.90016	0.956722	0.540042	0.511615	-0.00982124	0.511615	0.12592	0.148013	0.233315	0.0507628	0.0185413	0.989381	1.24455
224	3.66483	3.37399	3.40238	4.49851	3.40238	4.49851	3.04205	3.66483	0.938748	4.69699	3.63188	3.66483	5.61741	6.08231	4.56418	6.7774	3.3818	6.3384	0.67905	2.09063	2.23097	2.09063	2.09063		0.41681	0.378296	0.161246	0.729546	0.0788174	0.244293	0.0979554	0.19428	1.57527	-0.0273518	0.0121348	1.41817	1.82193	0.972504	0.577219	0.438366	-0.0273518	0.438366	0.168138	0.147831	0.185891	0.0494653	-0.117363	0.987873	1.14837
225	3.5496	3.41383	3.33556	4.37516	3.33556	4.37516	3.26942	3.5496	0.896507	4.69295	3.82356	3.5496	5.72001	6.2458	4.49462	6.56865	3.34091	6.36282	0.731009	2.44661	2.69486	2.44661	2.44661		0.443627	0.415782	0.18241	0.723393	0.106344	0.250864	0.0891398	0.212358	1.57737	0.00305216	-0.0862963	1.23179	1.75344	0.989393	0.54148	0.414154	0.00305216	0.414154	0.138635	0.122873	0.226821	0.0850918	-0.136544	1.14661	1.21635
226	3.64449	3.47773	3.3805	4.41849	3.3805	4.41849	3.18602	3.64449	0.896183	4.72326	3.77352	3.64449	6.06437	6.76496	4.50012	7.0756	3.4071	6.39432	0.672321	1.45737	2.59696	1.45737	1.45737		0.41264	0.398831	0.197674	0.804964	0.0681497	0.261238	0.0365084	0.247868	1.52314	0.0180087	0.0147451	1.27297	1.7964	1.06752	0.488328	0.507751	0.0180087	0.507751	0.0785017	0.113434	0.154499	0.00352461	-0.169222	1.10793	1.21837
227	3.65618	3.46858	3.33687	4.43384	3.33687	4.43384	3.37289	3.65618	0.869209	4.8553	3.86398	3.65618	5.93308	5.92836	4.3304	6.31657	3.34776	6.17748	0.715036	2.26008	2.66456	2.26008	2.26008		0.421926	0.360082	0.108291	0.761804	0.123985	0.265417	0.114647	0.190515	1.37885	-0.0477046	-0.0444124	1.45762	1.75271	0.993313	0.521277	0.446075	-0.0477046	0.446075	0.0991477	0.148095	0.20014	0.0806472	-0.0980321	1.02571	1.21557
228	3.54212	3.46238	3.39845	4.52448	3.39845	4.52448	3.20545	3.54212	0.921889	4.84353	3.79562	3.54212	6.10652	6.29505	4.46204	6.55742	3.43495	6.21215	0.75511	2.20363	3.4053	2.20363	2.20363		0.406476	0.469857	0.157371	0.658409	-0.0309906	0.305714	0.135318	0.150152	1.60101	-0.0209794	-0.0689337	1.41455	1.96586	1.19321	0.462081	0.414023	-0.0209794	0.414023	0.0811921	0.186557	0.224653	0.0494527	-0.0818516	1.04423	1.07772
229	3.67077	3.43222	3.36914	4.48056	3.36914	4.48056	3.29585	3.67077	0.976007	4.98452	3.8864	3.67077	6.17704	6.01721	4.57347	6.76941	3.40039	6.29596	0.738836	1.54503	3.06476	1.54503	1.54503		0.48934	0.449838	0.158525	0.66996	0.0520117	0.265839	0.140413	0.0975071	1.57458	0.0119286	-0.0236188	1.24804	1.94479	1.17564	0.540614	0.576813	0.0119286	0.576813	0.0625377	0.193409	0.265525	-0.0333434	-0.150667	0.973212	1.1396
230	3.667	3.48865	3.39219	4.6586	3.39219	4.6586	3.03653	3.667	0.994166	4.52644	3.73335	3.667	6.29593	6.36043	4.70008	6.39117	3.35338	6.56512	0.799321	3.0909	2.70361	3.0909	3.0909		0.404742	0.417157	0.210627	0.735036	-0.126854	0.288809	0.142701	0.12997	1.58294	-0.0156384	-0.0335459	1.29083	1.76997	1.15431	0.526614	0.526552	-0.0156384	0.526552	0.0403428	0.10136	0.140205	0.0694952	-0.142671	0.969045	1.13868
231	3.6336	3.39557	3.3666	4.41859	3.3666	4.41859	3.24818	3.6336	0.949051	4.634	3.77759	3.6336	5.70651	5.54776	4.54969	6.68429	3.43733	6.39072	0.661869	1.828	2.62546	1.828	1.828		0.497586	0.407719	0.14339	0.741188	-0.118019	0.28227	0.0655159	0.234694	1.50415	0.0123743	-0.0286812	1.3058	1.88307	1.06311	0.505607	0.578137	0.0123743	0.578137	0.0818345	0.107501	0.227139	0.0401726	-0.109392	1.07489	1.20771
232	3.62749	3.44082	3.36165	4.52163	3.36165	4.52163	3.29984	3.62749	0.878913	4.71593	3.74835	3.62749	5.97278	6.656	4.19898	6.59199	3.38851	6.18779	0.752263	1.75689	2.51233	1.75689	1.75689		0.421739	0.406395	0.148987	0.775827	0.0392394	0.300859	0.154778	0.202672	1.54671	-0.0397727	-0.0332987	1.20866	2.02117	1.09012	0.548852	0.578175	-0.0397727	0.578175	0.0377916	0.0886669	0.1962	-0.0485028	-0.063019	1.07406	1.18112
233	3.52962	3.43964	3.37699	4.44382	3.37699	4.44382	3.30586	3.52962	0.89466	4.75646	3.81647	3.52962	5.77981	6.16317	4.55389	6.63932	3.44137	6.53855	0.76464	1.62019	2.52103	1.62019	1.62019		0.381343	0.422409	0.131191	0.797941	-0.0338751	0.285682	0.140394	0.116088	1.56755	0.0129859	-0.0769822	1.3141	1.91889	1.20554	0.565447	0.599126	0.0129859	0.599126	0.0315962	0.0380677	0.153091	-0.0580126	-0.158512	0.99713	1.16008
234	3.60978	3.47723	3.40766	4.30891	3.40766	4.30891	2.96632	3.60978	0.924525	4.61529	3.67882	3.60978	6.1355	5.6009	4.33144	6.51594	3.39181	6.3348	0.688628	2.02297	2.32936	2.02297	2.02297		0.492874	0.488476	0.149625	0.717751	0.00131484	0.266742	0.182004	0.219438	1.62684	-0.0217817	-0.0318354	1.32346	1.95569	1.2727	0.563948	0.63342	-0.0217817	0.63342	0.0575588	0.104449	0.254399	0.0796482	-0.0967424	0.981831	1.20222
235	3.5163	3.4913	3.33299	4.51415	3.33299	4.51415	3.4048	3.5163	0.835955	4.88966	3.77421	3.5163	6.17426	6.20389	4.45541	6.36859	3.35293	6.33575	0.748874	2.17277	2.34894	2.17277	2.17277		0.474679	0.489327	0.183329	0.593507	-0.109635	0.237228	0.166076	0.210491	1.5307	0.0571626	-0.00776894	1.19909	1.90086	1.33922	0.537374	0.560569	0.0571626	0.560569	0.116751	0.0554176	0.282204	0.0585492	-0.111047	0.963472	1.18672
236	3.67174	3.43029	3.36607	4.39931	3.36607	4.39931	3.06503	3.67174	0.837136	4.93123	3.86049	3.67174	6.04808	5.87235	4.40154	6.86126	3.37024	6.27578	0.686161	2.73449	2.51466	2.73449	2.73449		0.486602	0.465774	0.181187	0.677041	0.0386689	0.272995	0.154801	0.239465	1.54988	0.0366203	-0.0187145	1.2408	2.13789	1.25797	0.625947	0.516461	0.0366203	0.516461	0.0558996	0.087473	0.222279	-0.0149444	-0.151831	1.06649	1.13976
237	3.5672	3.44662	3.43606	4.38141	3.43606	4.38141	3.35029	3.5672	0.912511	4.77453	3.85055	3.5672	6.20495	6.30006	4.51486	6.53269	3.38456	6.216	0.721416	2.41549	2.86205	2.41549	2.41549		0.417092	0.410788	0.137691	0.638721	0.0522523	0.272982	0.182132	0.232694	1.52148	-0.0575029	-0.0270102	1.25179	1.98135	1.24175	0.571955	0.578823	-0.0575029	0.578823	0.102529	0.0126275	0.106337	-0.0335381	-0.125803	1.00844	1.11365
238	3.53851	3.46882	3.34482	4.43079	3.34482	4.43079	3.21305	3.53851	0.966234	4.86662	3.79976	3.53851	5.97609	6.19035	4.38108	6.17442	3.40319	6.18539	0.730229	1.99487	2.50667	1.99487	1.99487		0.516519	0.474301	0.131584	0.738843	0.0333199	0.294535	0.135548	0.186861	1.56286	-0.0356967	-0.0735907	1.44277	2.07957	1.32562	0.606037	0.519464	-0.0356967	0.519464	0.0349015	0.0687844	0.201457	0.00601592	-0.152353	1.00819	1.25123
239	3.54953	3.42491	3.38306	4.43305	3.38306	4.43305	3.46302	3.54953	0.84749	4.52557	3.77488	3.54953	6.05536	5.8589	4.42159	6.18083	3.38363	5.80149	0.695961	2.68976	1.89696	2.68976	2.68976		0.443569	0.378425	0.173636	0.743974	0.206055	0.286904	0.103404	0.128749	1.5593	-0.0412272	-0.0215325	1.31078	2.10531	1.14465	0.640508	0.602776	-0.0412272	0.602776	0.085174	0.0213204	0.195383	0.0926036	-0.146614	1.08085	1.23753
240	3.63841	3.457	3.4136	4.47185	3.4136	4.47185	3.4645	3.63841	0.884492	4.78371	3.79534	3.63841	5.97228	6.40754	4.64242	6.50509	3.4537	6.11384	0.699223	1.48185	2.68898	1.48185	1.48185		0.476196	0.470735	0.22351	0.624652	-0.0286464	0.263031	0.118336	0.231585	1.5518	-0.0385336	-0.0213743	1.28604	1.94661	1.35311	0.635841	0.600979	-0.0385336	0.600979	0.0634848	0.0523191	0.29853	-0.0594489	-0.159328	1.06705	1.18395
241	3.58971	3.42813	3.36173	4.39739	3.36173	4.39739	3.31128	3.58971	0.974039	4.76939	3.76796	3.58971	5.78103	6.2855	4.57163	6.53161	3.41078	6.1055	0.774774	2.89128	2.45951	2.89128	2.89128		0.437744	0.442153	0.137611	0.630735	-0.0352281	0.317446	0.159333	0.183445	1.65626	-0.056168	0.0104539	1.36321	2.0563	1.2153	0.637596	0.660116	-0.056168	0.660116	0.08187	0.0553713	0.234962	-0.00299931	-0.112812	1.12778	1.26436
242	3.70203	3.52042	3.41379	4.29982	3.41379	4.29982	3.20933	3.70203	0.847781	4.44549	3.78524	3.70203	6.39309	6.49527	4.85515	6.50808	3.44816	6.23833	0.704314	2.15157	2.54414	2.15157	2.15157		0.432361	0.397722	0.224961	0.719318	0.0868414	0.319662	0.0639777	0.220668	1.57282	0.010395	-0.0271783	1.49992	2.2236	1.49592	0.587003	0.617907	0.010395	0.617907	0.108489	-0.0109823	0.182224	0.000227623	-0.110635	1.14202	1.31221
243	3.67545	3.3915	3.42601	4.47215	3.42601	4.47215	3.5776	3.67545	0.916806	4.58775	3.92609	3.67545	6.21146	6.64894	4.64984	6.58762	3.39812	6.36409	0.812335	2.86214	2.61828	2.86214	2.86214		0.440513	0.425203	0.188764	0.740376	0.10352	0.284031	0.163474	0.248093	1.66837	-0.0174033	-0.0217797	1.2643	2.1913	1.3793	0.566276	0.73292	-0.0174033	0.73292	0.0788958	-0.0559408	0.155294	0.0400927	-0.161093	1.12406	1.19872
244	3.62254	3.40689	3.32831	4.29736	3.32831	4.29736	3.24463	3.62254	0.781597	5.00293	3.90106	3.62254	6.15805	6.47441	4.75123	6.49982	3.37485	6.04869	0.760758	2.82844	2.33746	2.82844	2.82844		0.459836	0.423853	0.196434	0.696241	0.0878032	0.31571	0.0917971	0.158452	1.61817	0.00905215	-0.0433544	1.33874	2.10866	1.23898	0.54851	0.637534	0.00905215	0.637534	0.0665747	-0.0322035	0.0743445	0.0474434	-0.155781	1.12776	1.1784
245	3.57057	3.42292	3.42041	4.20612	3.42041	4.20612	3.1406	3.57057	0.920623	4.77003	3.80933	3.57057	5.80891	5.98437	4.67501	6.93598	3.41319	6.23321	0.775712	2.14407	2.1539	2.14407	2.14407		0.449213	0.399511	0.16227	0.615772	-0.111559	0.328937	0.0960622	0.231401	1.59378	-0.0360307	-0.0805318	1.52758	2.24256	1.45044	0.601125	0.595725	-0.0360307	0.595725	0.0845723	-0.00845847	0.0877752	0.0499935	-0.171573	1.15283	1.23414
246	3.66282	3.42233	3.38353	4.35647	3.38353	4.35647	3.37152	3.66282	0.903679	4.74052	3.84129	3.66282	6.01763	6.371	4.65054	6.22504	3.45715	6.137	0.746345	2.71286	2.81484	2.71286	2.71286		0.505564	0.427739	0.16513	0.770766	0.0384889	0.288523	0.0861504	0.203719	1.60639	-0.0504298	-0.0340799	1.53245	2.1096	1.23778	0.608584	0.607075	-0.0504298	0.607075	0.127303	-0.0261813	0.151661	0.00660161	-0.241457	1.08928	1.21514
247	3.60892	3.45258	3.39934	4.41569	3.39934	4.41569	3.2686	3.60892	0.987406	4.92823	3.78343	3.60892	6.24134	6.37045	4.71821	6.77524	3.39742	6.13719	0.804221	2.33024	3.04099	2.33024	2.33024		0.409056	0.411355	0.161372	0.589084	0.0692612	0.315671	0.1672	0.35406	1.57475	-0.0234101	-0.0169644	1.30392	2.19911	1.39883	0.593461	0.65085	-0.0234101	0.65085	0.0589	0.016436	0.176241	0.0236582	-0.163412	1.06125	1.34456
248	3.68954	3.42517	3.38835	4.34964	3.38835	4.34964	3.51894	3.68954	0.919579	4.41171	3.82906	3.68954	6.00629	6.76978	4.8494	6.69672	3.43126	6.29406	0.727031	2.05899	2.07911	2.05899	2.05899		0.479658	0.3787	0.142947	0.679444	-0.00385414	0.296913	0.139026	0.147597	1.54042	0.0543889	-0.0866621	1.50022	2.04613	1.64573	0.541187	0.673988	0.0543889	0.673988	0.110273	0.0513803	0.310575	0.0463406	-0.185181	1.05594	1.30825
249	3.62715	3.46175	3.37348	4.26952	3.37348	4.26952	3.28737	3.62715	0.91441	4.81835	3.68998	3.62715	6.36841	6.12079	4.41335	6.38229	3.3746	6.2093	0.687402	2.05046	2.76551	2.05046	2.05046		0.46691	0.46727	0.153067	0.775201	-0.0529884	0.282855	0.102621	0.187303	1.62753	0.0537141	-0.0495638	1.48469	2.12905	1.39811	0.485867	0.657548	0.0537141	0.657548	0.00185809	-0.0724331	0.208734	0.059331	-0.176109	1.06044	1.14584
250	3.64629	3.44371	3.34409	4.34324	3.34409	4.34324	3.35609	3.64629	0.837752	4.73614	3.75955	3.64629	6.3813	6.51197	4.56128	6.71074	3.48088	6.11163	0.746567	1.70802	2.28334	1.70802	1.70802		0.415531	0.448945	0.213364	0.777406	-0.0464672	0.274484	0.180834	0.196014	1.66363	-0.0342184	-0.0291361	1.36391	2.04901	1.67401	0.580326	0.731151	-0.0342184	0.731151	0.15516	0.0147051	0.151037	-0.0255107	-0.152004	1.11577	1.10652
251	3.58587	3.44868	3.35511	4.47013	3.35511	4.47013	3.11658	3.58587	0.880334	4.64179	3.82626	3.58587	6.29114	6.13999	4.61695	6.80176	3.43711	5.9979	0.744261	1.86799	2.52886	1.86799	1.86799		0.386416	0.40802	0.193783	0.702938	-0.0351078	0.294034	0.139431	0.255348	1.65489	-0.140586	-0.0511557	1.64452	2.25233	1.54005	0.592657	0.715815	-0.140586	0.715815	0.056764	0.00980234	0.23839	-0.0280259	-0.180922	1.11174	1.26654
252	3.56346	3.43824	3.37034	4.39941	3.37034	4.39941	3.27095	3.56346	0.803949	5.04347	3.86872	3.56346	6.47507	6.40105	4.58689	6.96174	3.49902	6.06919	0.689741	1.82334	2.63215	1.82334	1.82334		0.462423	0.415542	0.187687	0.685875	0.0254465	0.330107	0.088845	0.237762	1.69906	0.00452253	-0.0663134	1.56223	2.24486	1.45041	0.578498	0.731503	0.00452253	0.731503	0.0452586	-0.0541452	0.252264	0.000125336	-0.148078	1.08272	1.17283
253	3.6527	3.41539	3.44998	4.44692	3.44998	4.44692	3.21196	3.6527	0.799345	5.11275	3.90402	3.6527	6.12588	5.92196	4.63059	6.84223	3.43171	6.30887	0.791574	2.19863	2.55584	2.19863	2.19863		0.489514	0.438673	0.200358	0.748676	-0.0519661	0.300293	0.170374	0.20179	1.51672	-0.0283775	-0.077961	1.64695	2.20839	1.74577	0.572662	0.67659	-0.0283775	0.67659	0.0564671	-0.0133052	0.279557	-0.011349	-0.225237	1.06973	1.2959
254	3.60331	3.4232	3.36741	4.49585	3.36741	4.49585	3.35932	3.60331	0.817162	4.81997	3.85072	3.60331	6.37983	6.41867	4.90311	6.67388	3.45847	6.45973	0.773278	2.37679	2.69426	2.37679	2.37679		0.412214	0.368059	0.164155	0.624652	0.145652	0.300976	0.160632	0.225809	1.50734	-0.00995666	-0.0358794	1.50137	2.1899	1.65638	0.491765	0.635653	-0.00995666	0.635653	0.0303167	-0.0513761	0.243442	0.0859872	-0.22367	1.03035	1.23543
255	3.53159	3.45089	3.34461	4.33149	3.34461	4.33149	3.28944	3.53159	0.874788	4.91281	3.95164	3.53159	6.33149	6.39484	4.64877	6.26304	3.41185	6.12978	0.770829	2.15769	2.2586	2.15769	2.15769		0.489594	0.437581	0.13455	0.719481	-0.0236583	0.306747	0.136124	0.0866003	1.57224	-0.0491343	-0.0607962	1.62993	2.35707	1.86894	0.565593	0.649228	-0.0491343	0.649228	0.0722104	-0.104726	0.318341	-0.0290137	-0.170758	1.02012	1.26312
256	3.59212	3.48601	3.37097	4.45577	3.37097	4.45577	3.10974	3.59212	0.901762	4.825	3.76527	3.59212	6.70209	6.46031	4.59383	6.63348	3.41012	6.15686	0.823916	2.56193	2.09412	2.56193	2.56193		0.451164	0.418559	0.190047	0.654822	-0.0535892	0.298513	0.138353	0.198343	1.70331	-0.0370948	-0.0519369	1.58828	2.25126	1.75271	0.584152	0.756114	-0.0370948	0.756114	0.0903736	-0.0579633	0.167681	-0.0444604	-0.285075	1.01539	1.36571
257	3.71326	3.48215	3.34945	4.50372	3.34945	4.50372	3.25519	3.71326	0.809409	4.72811	3.8408	3.71326	6.147	5.79509	4.65348	6.87547	3.41056	6.41127	0.808962	1.96608	2.51358	1.96608	1.96608		0.472821	0.41102	0.208134	0.670737	0.0475344	0.326122	0.147685	0.140404	1.68673	-0.0340356	-0.0497319	1.72447	2.25079	1.95102	0.483869	0.711293	-0.0340356	0.711293	0.00726526	-0.115624	0.252934	-0.092032	-0.190493	0.966841	1.27332
258	3.59693	3.44084	3.42988	4.30832	3.42988	4.30832	3.04003	3.59693	0.832754	5.04439	3.8514	3.59693	6.14917	5.87634	4.46264	6.51124	3.40926	6.11074	0.748524	3.01272	2.5541	3.01272	3.01272		0.448454	0.500536	0.195485	0.646232	-0.0996884	0.309958	0.133605	0.205289	1.76348	0.046545	-0.0274156	1.71972	2.09293	1.96952	0.544709	0.750962	0.046545	0.750962	0.0736555	-0.129666	0.249119	-0.0910218	-0.191783	1.0666	1.17859
259	3.59499	3.47635	3.35241	4.48808	3.35241	4.48808	3.3701	3.59499	0.85473	5.1907	3.81401	3.59499	6.55418	6.33168	4.85395	6.78102	3.50922	6.23441	0.823741	1.84489	2.65091	1.84489	1.84489		0.482201	0.427928	0.191115	0.597616	-0.0736937	0.332538	0.169835	0.303323	1.66547	0.0423573	-0.0342875	1.74978	2.22725	1.96586	0.567689	0.700089	0.0423573	0.700089	5.78026e-06	-0.122094	0.253536	0.0106791	-0.263568	1.019	1.25494
260	3.58073	3.49159	3.33933	4.45695	3.33933	4.45695	3.28824	3.58073	0.857434	4.82084	3.92108	3.58073	6.47863	6.6303	4.69364	6.81883	3.41568	6.34656	0.808532	2.99419	2.43955	2.99419	2.99419		0.425084	0.407427	0.171729	0.636446	-0.0303595	0.344867	0.14886	0.264941	1.59613	0.00652554	-0.0354246	1.67504	2.17883	1.94441	0.602162	0.715963	0.00652554	0.715963	0.00757661	-0.137065	0.263856	-0.0902399	-0.226924	1.14552	1.2111
261	3.60484	3.46556	3.40868	4.32539	3.40868	4.32539	3.21114	3.60484	0.812096	4.81252	3.99623	3.60484	6.44523	6.56409	4.65935	6.98559	3.45318	6.37781	0.829882	2.29284	2.7536	2.29284	2.29284		0.528406	0.479132	0.214799	0.853719	-0.18852	0.30977	0.153995	0.269342	1.66826	0.0239929	-0.0429886	1.72174	2.16446	2.11822	0.474352	0.75351	0.0239929	0.75351	-0.00558136	-0.0782013	0.327242	-0.155969	-0.220455	1.08299	1.34811
262	3.62147	3.49369	3.37343	4.45631	3.37343	4.45631	3.33738	3.62147	0.83248	5.0135	3.92357	3.62147	6.57186	6.53756	4.72885	7.28777	3.45491	6.26345	0.741365	1.91936	2.39142	1.91936	1.91936		0.482006	0.434693	0.149559	0.659513	-0.00866213	0.273898	0.136723	0.296849	1.62809	0.0604442	-0.0188826	1.86608	2.16421	2.11235	0.568068	0.821792	0.0604442	0.821792	0.0197046	-0.0809898	0.220407	-0.0861863	-0.205779	1.14954	1.17068
263	3.51256	3.5123	3.34048	4.40723	3.34048	4.40723	3.33185	3.51256	0.86998	5.10952	3.87742	3.51256	6.30633	6.63169	4.76686	6.40772	3.39923	6.22632	0.827273	2.39282	2.84035	2.39282	2.39282		0.473876	0.427627	0.132818	0.651131	-0.0258519	0.324517	0.136741	0.24674	1.53537	0.00430023	0.0300314	1.69499	2.37566	2.02597	0.459352	0.67434	0.00430023	0.67434	0.033463	-0.160191	0.274006	-0.125638	-0.263393	1.0268	1.29615
264	3.51149	3.45499	3.39955	4.57868	3.39955	4.57868	3.28217	3.51149	0.870099	4.75848	3.83707	3.51149	6.56683	6.50557	4.59288	6.74569	3.40253	6.12909	0.842084	2.87386	2.44972	2.87386	2.87386		0.557716	0.485124	0.184394	0.793112	-0.0705981	0.316978	0.13056	0.273559	1.65554	-0.00956734	-0.0168359	1.78491	2.21413	2.19013	0.496175	0.656956	-0.00956734	0.656956	0.0300198	-0.111487	0.196893	-0.19371	-0.264857	0.945986	1.28772
265	3.54151	3.54984	3.35432	4.42282	3.35432	4.42282	3.07713	3.54151	0.864554	4.97545	3.95703	3.54151	6.94928	6.90287	4.83424	6.7958	3.44032	6.11068	0.782617	1.39384	2.09026	1.39384	1.39384		0.413695	0.448351	0.155649	0.688034	0.0253262	0.311693	0.12718	0.237844	1.63107	-0.0259299	-0.0219478	1.78539	2.43393	2.15412	0.53903	0.831809	-0.0259299	0.831809	0.00715491	-0.177349	0.221893	-0.136204	-0.174589	0.99286	1.22884
266	3.52318	3.52289	3.43651	4.54774	3.43651	4.54774	3.32764	3.52318	0.814715	4.97101	3.83727	3.52318	6.61066	6.5766	4.6847	7.13916	3.39683	6.3193	0.852727	3.1171	2.28563	3.1171	3.1171		0.435042	0.388259	0.17848	0.651444	0.248428	0.288451	0.135397	0.208367	1.59462	0.0138368	-0.0243109	1.71008	2.30598	2.40381	0.454782	0.759986	0.0138368	0.759986	0.0122153	-0.161412	0.21809	-0.111074	-0.332509	0.934846	1.24636
267	3.66075	3.42068	3.43297	4.49217	3.43297	4.49217	3.52611	3.66075	0.863339	5.54359	3.80377	3.66075	6.33727	6.93745	4.68171	7.25295	3.43861	6.21651	0.792416	2.33964	2.65271	2.33964	2.33964		0.57889	0.420037	0.176469	0.668369	-0.0245898	0.300748	0.134775	0.272194	1.7402	-0.0198825	-0.0413077	1.90422	2.45994	2.25383	0.534875	0.756058	-0.0198825	0.756058	-0.0369511	-0.0815278	0.343115	-0.122352	-0.201868	0.996675	1.36808
268	3.47649	3.54229	3.40772	4.61389	3.40772	4.61389	3.26219	3.47649	0.86404	5.06327	3.91783	3.47649	6.37373	7.2039	4.74637	6.69761	3.40963	6.10847	0.820909	2.7688	2.46327	2.7688	2.7688		0.451872	0.390132	0.162892	0.641635	0.104963	0.321567	0.160678	0.236675	1.75337	0.039974	0.0125798	2.08022	2.26879	2.03822	0.571662	0.62496	0.039974	0.62496	-0.0349254	-0.194124	0.306614	-0.163044	-0.317444	1.00664	1.43316
269	3.55695	3.5137	3.41169	4.47303	3.41169	4.47303	3.23489	3.55695	0.792738	4.61899	3.91958	3.55695	6.75542	7.12312	4.55727	6.84198	3.45685	6.11309	0.81671	3.41042	2.50439	3.41042	3.41042		0.496502	0.403722	0.207939	0.63308	-0.0352281	0.292377	0.116453	0.348673	1.79375	0.000771552	-0.0357509	1.93456	2.47354	2.26821	0.533572	0.654037	0.000771552	0.654037	-0.00520828	-0.151061	0.343955	-0.20833	-0.328226	0.966036	1.34768
270	3.51747	3.50735	3.39049	4.55379	3.39049	4.55379	3.02739	3.51747	0.831795	5.38787	3.91266	3.51747	6.43033	6.5332	4.65067	6.92869	3.51867	6.37313	0.752502	1.94436	2.27372	1.94436	1.94436		0.46785	0.439257	0.193571	0.597721	0.0422451	0.332206	0.126171	0.222823	1.73266	0.00412532	-0.0245976	1.89612	2.35457	2.3252	0.426379	0.734977	0.00412532	0.734977	0.0335878	-0.0937557	0.290843	-0.212901	-0.282258	0.936803	1.27278
271	3.50003	3.49297	3.42468	4.47658	3.42468	4.47658	3.03964	3.50003	0.759689	5.44537	3.9565	3.50003	6.56297	6.46588	4.69658	7.04629	3.48399	6.18393	0.845346	2.08873	2.4792	2.08873	2.08873		0.420611	0.407229	0.170512	0.702277	0.00870774	0.26801	0.134973	0.290458	1.66339	-0.00128675	-0.0114076	1.98671	2.27155	2.32958	0.524811	0.733902	-0.00128675	0.733902	0.0730472	-0.143862	0.187084	-0.259577	-0.269718	1.02652	1.39534
272	3.54529	3.48743	3.36976	4.41874	3.36976	4.41874	3.271	3.54529	0.78134	5.29907	3.92205	3.54529	6.64487	6.51438	4.70649	7.03678	3.43445	6.45442	0.8526	2.77095	2.21384	2.77095	2.77095		0.473392	0.385018	0.158135	0.641507	0.177747	0.340214	0.109751	0.299763	1.69445	0.0485954	-0.0435126	1.96274	2.2525	2.45045	0.506874	0.654214	0.0485954	0.654214	-0.00948041	-0.197614	0.288255	-0.198615	-0.242455	0.900517	1.48012
273	3.4168	3.52215	3.36359	4.52522	3.36359	4.52522	3.34187	3.4168	0.815639	4.91004	3.87639	3.4168	6.71088	6.85965	4.63668	7.05111	3.50155	6.60085	0.785576	3.3156	2.43009	3.3156	3.3156		0.442485	0.414346	0.166063	0.571254	0.0634014	0.29094	0.146299	0.19825	1.72899	0.0310254	-0.0498506	2.07814	2.35035	2.43256	0.594363	0.704918	0.0310254	0.704918	0.0592876	-0.129511	0.270748	-0.14592	-0.286983	0.970255	1.43084
274	3.53286	3.50157	3.42326	4.28865	3.42326	4.28865	3.04178	3.53286	0.880898	5.22753	3.92304	3.53286	6.63554	6.98595	4.85944	7.0664	3.46357	6.03598	0.73042	3.57832	2.68523	3.57832	3.57832		0.431169	0.432647	0.169302	0.705342	-0.162345	0.350476	0.174404	0.311686	1.80882	-0.0269151	-0.0567126	1.90223	2.31329	2.4875	0.454185	0.75034	-0.0269151	0.75034	0.0242395	-0.141867	0.249391	-0.189609	-0.318133	0.956209	1.41838
275	3.47568	3.57144	3.37461	4.52212	3.37461	4.52212	3.33869	3.47568	0.804788	5.1265	4.00407	3.47568	7.12441	6.29904	4.66475	7.00627	3.44591	6.08519	0.845361	2.28499	2.63432	2.28499	2.28499		0.538039	0.427318	0.171877	0.795654	0.0196759	0.324484	0.149956	0.273056	1.63433	0.0594433	0.00939594	1.99696	2.38508	2.55574	0.540956	0.749137	0.0594433	0.749137	-0.0443209	-0.121465	0.238901	-0.265929	-0.352149	0.815694	1.42333
276	3.42361	3.37835	3.4592	4.36602	3.4592	4.36602	3.14312	3.42361	0.869876	5.1486	3.91877	3.42361	6.59338	6.76691	4.69367	7.25041	3.42859	6.25244	0.876733	2.21147	2.5647	2.21147	2.21147		0.407517	0.4079	0.14747	0.720839	-0.0740539	0.320501	0.174864	0.219305	1.60482	0.00299686	0.0282318	2.20774	2.33905	2.58357	0.453466	0.718391	0.00299686	0.718391	-0.00997174	-0.137913	0.254955	-0.222411	-0.327973	0.985588	1.49287
277	3.50251	3.46889	3.40533	4.51469	3.40533	4.51469	3.23751	3.50251	0.875764	4.88769	3.95954	3.50251	6.78881	6.78305	4.79771	6.76947	3.50192	6.14415	0.841973	2.61494	2.69557	2.61494	2.61494		0.474202	0.446477	0.228234	0.690391	-0.0275348	0.339076	0.169544	0.336084	1.65482	-0.0217264	-0.00424895	2.08436	2.5251	2.74081	0.499892	0.728853	-0.0217264	0.728853	0.000807134	-0.161503	0.266603	-0.261162	-0.360508	1.00684	1.48383
278	3.4508	3.53121	3.42839	4.47466	3.42839	4.47466	3.04495	3.4508	0.895259	5.02459	3.89486	3.4508	6.37713	6.59441	4.48202	5.93186	3.46438	6.17014	0.775219	2.9916	2.35878	2.9916	2.9916		0.45808	0.426398	0.201496	0.578079	-0.0483899	0.301691	0.156252	0.222084	1.72181	0.00329929	0.0148638	2.25575	2.29679	2.66211	0.533108	0.77017	0.00329929	0.77017	0.0287757	-0.181422	0.278241	-0.218219	-0.329287	0.98616	1.49559
279	3.48534	3.50781	3.4632	4.33144	3.4632	4.33144	2.97081	3.48534	0.903576	5.15426	3.88853	3.48534	6.24506	6.27483	4.42866	6.61109	3.44818	5.65594	0.807021	2.89886	2.51744	2.89886	2.89886		0.464006	0.406567	0.164377	0.67054	-0.0317117	0.338062	0.106766	0.244359	1.77907	0.0396716	-0.0355531	2.26251	2.36636	2.74342	0.607268	0.705715	0.0396716	0.705715	0.0773273	-0.166624	0.315684	-0.268272	-0.370507	1.02793	1.45041
280	3.40307	3.5156	3.43475	4.51474	3.43475	4.51474	3.19106	3.40307	0.782641	5.12361	3.94681	3.40307	6.41805	6.56409	4.58868	6.27864	3.41179	5.85279	0.823137	2.39006	3.03871	2.39006	2.39006		0.475589	0.420157	0.191587	0.800657	0.051771	0.31662	0.156146	0.245929	1.70164	0.00525377	-0.00131233	2.07552	2.41745	2.9744	0.533389	0.665128	0.00525377	0.665128	0.0264452	-0.182078	0.314073	-0.251135	-0.353368	0.99907	1.4404
281	3.58827	3.52812	3.44922	4.6073	3.44922	4.6073	3.19554	3.58827	0.886513	5.31523	4.03743	3.58827	6.5153	6.39224	4.82884	6.95482	3.45802	6.16742	0.780103	2.92041	2.19719	2.92041	2.92041		0.533999	0.415859	0.208018	0.697298	0.059795	0.293631	0.169351	0.159396	1.83667	0.0341569	-0.0315882	2.28254	2.09818	2.85097	0.492984	0.699433	0.0341569	0.699433	0.043807	-0.155243	0.260665	-0.377105	-0.381921	0.92781	1.45191
282	3.55281	3.51919	3.44954	4.47967	3.44954	4.47967	3.35916	3.55281	0.870133	4.99612	3.90106	3.55281	6.4808	7.26102	4.68698	6.82663	3.42747	6.23467	0.835244	2.39894	2.70867	2.39894	2.39894		0.471535	0.378494	0.144934	0.678979	-0.0453851	0.338881	0.101562	0.300717	1.79354	0.0582121	-0.0648896	2.04314	2.42971	2.77335	0.462874	0.796541	0.0582121	0.796541	0.0758191	-0.247065	0.217159	-0.365413	-0.335921	0.891392	1.41101
283	3.60214	3.46527	3.36942	4.62909	3.36942	4.62909	3.25842	3.60214	0.820431	5.14965	3.88975	3.60214	6.45219	6.38779	4.74801	7.10408	3.47014	6.23757	0.846793	2.82275	2.68839	2.82275	2.82275		0.468008	0.387812	0.200864	0.732528	0.0239134	0.342384	0.0949018	0.288241	1.71412	0.0152349	0.00723056	2.17021	2.17907	2.84689	0.552629	0.746068	0.0152349	0.746068	0.0213494	-0.145102	0.298189	-0.352469	-0.409114	0.980609	1.55929
284	3.47752	3.50045	3.49259	4.49581	3.49259	4.49581	3.13732	3.47752	0.78656	4.92303	3.90155	3.47752	6.33559	6.07415	4.61805	6.38648	3.44365	6.3916	0.770669	2.13855	2.29254	2.13855	2.13855		0.465458	0.442936	0.157606	0.680802	-0.10071	0.291864	0.140735	0.312722	1.74511	0.00484076	0.00816988	2.10556	2.39933	2.89443	0.500197	0.790991	0.00484076	0.790991	0.0240674	-0.186087	0.179341	-0.382513	-0.386007	0.912351	1.45345
285	3.60611	3.44349	3.31792	4.70237	3.31792	4.70237	2.96911	3.60611	0.741359	5.09462	3.95419	3.60611	6.16501	6.30571	4.60498	6.7899	3.47483	6.11777	0.805605	2.62028	2.76317	2.62028	2.62028		0.467033	0.40704	0.195509	0.727769	-0.00241191	0.343879	0.144134	0.208182	1.71297	-0.0522658	0.0436763	2.26385	2.28702	3.04715	0.569018	0.818669	-0.0522658	0.818669	0.0369338	-0.241607	0.26204	-0.360624	-0.389078	0.865169	1.5193
286	3.42101	3.49448	3.30682	4.44623	3.30682	4.44623	3.25661	3.42101	0.905562	5.17528	3.88004	3.42101	6.25468	6.58096	4.67555	6.65358	3.43046	6.01555	0.756924	2.35696	2.32936	2.35696	2.35696		0.539434	0.40955	0.225811	0.735755	-0.0277149	0.371626	0.137722	0.270881	1.67236	-0.00531533	0.0090301	2.38819	2.26888	3.05079	0.480689	0.65969	-0.00531533	0.65969	-0.0220367	-0.171062	0.257521	-0.450081	-0.410024	0.937462	1.50778
287	3.47254	3.49621	3.48173	4.61001	3.48173	4.61001	3.06536	3.47254	0.857503	5.4687	3.97717	3.47254	6.20438	6.17894	4.67084	6.89406	3.49651	6.41355	0.808262	3.19511	2.72738	3.19511	3.19511		0.437709	0.431392	0.102842	0.597013	0.174111	0.332375	0.124987	0.28146	1.55509	0.0394019	0.0423612	2.32328	2.30612	2.98217	0.662526	0.604406	0.0394019	0.604406	-0.0247337	-0.228058	0.329127	-0.476279	-0.449922	0.948718	1.42602
288	3.53828	3.45617	3.35895	4.43595	3.35895	4.43595	3.10164	3.53828	0.817984	4.96489	3.98148	3.53828	6.34083	6.49703	4.43829	6.34061	3.46526	6.20051	0.832094	3.42671	2.99977	3.42671	3.42671		0.451706	0.443417	0.199373	0.645745	0.0562492	0.341624	0.134181	0.242389	1.59392	0.021569	0.0379909	2.1501	2.41398	2.9947	0.518292	0.673321	0.021569	0.673321	0.0313611	-0.178516	0.20089	-0.391563	-0.3923	1.00127	1.41106
289	3.59282	3.50811	3.4046	4.56476	3.4046	4.56476	3.35007	3.59282	0.854251	5.07118	3.96206	3.59282	6.42583	6.6125	4.58338	6.7925	3.46127	6.03351	0.765276	2.04753	2.05039	2.04753	2.04753		0.515471	0.411948	0.199489	0.745959	0.0636118	0.332499	0.101962	0.222249	1.61604	-0.013509	0.00506517	2.22606	2.4111	2.96638	0.539542	0.689508	-0.013509	0.689508	0.0456803	-0.157066	0.344488	-0.459143	-0.416104	1.01776	1.44578
290	3.47842	3.50612	3.41782	4.61709	3.41782	4.61709	3.13158	3.47842	0.870954	5.02187	3.99452	3.47842	6.66382	6.34597	4.45856	6.52463	3.5085	6.15186	0.826048	1.40238	2.37407	1.40238	1.40238		0.429572	0.472153	0.211824	0.698051	0.0434172	0.36189	0.102497	0.232837	1.70231	0.0190096	-0.0122579	2.25753	2.2914	3.01689	0.496418	0.64061	0.0190096	0.64061	0.00476267	-0.150697	0.295759	-0.372406	-0.430234	0.960982	1.47659
291	3.48634	3.47307	3.43441	4.50013	3.43441	4.50013	3.1116	3.48634	0.820071	5.06795	3.93908	3.48634	6.345	6.02732	4.3405	6.80512	3.43612	6.01384	0.825889	3.69632	2.19871	3.69632	3.69632		0.485576	0.446082	0.215566	0.755827	-0.156094	0.330055	0.105707	0.312085	1.65611	0.017388	-0.0166777	2.26526	2.31749	3.07503	0.662954	0.717622	0.017388	0.717622	0.042735	-0.197879	0.220838	-0.461554	-0.424115	0.949933	1.57566
292	3.56293	3.46151	3.39243	4.57671	3.39243	4.57671	3.21634	3.56293	0.814184	5.18186	3.88162	3.56293	6.12793	6.71368	4.44236	6.71791	3.45847	5.96178	0.763685	3.07357	2.55861	3.07357	3.07357		0.522603	0.412284	0.199829	0.639001	-0.00322306	0.357938	0.146515	0.253952	1.63092	0.0354196	-0.0341194	2.2155	2.33722	3.35301	0.623497	0.724256	0.0354196	0.724256	0.0661057	-0.201706	0.271111	-0.469548	-0.418867	0.984161	1.5355
293	3.47872	3.5242	3.34736	4.53682	3.34736	4.53682	2.84424	3.47872	0.832361	5.01489	4.01259	3.47872	6.29745	6.3876	4.3519	6.81235	3.45367	6.18184	0.790301	3.21855	2.41214	3.21855	3.21855		0.483617	0.415722	0.177547	0.687128	-0.03646	0.297524	0.152171	0.273354	1.75762	-0.0559931	-0.0218588	2.22723	2.32947	3.05407	0.518718	0.731725	-0.0559931	0.731725	0.0409996	-0.218298	0.313505	-0.526479	-0.45669	0.92934	1.52918
294	3.51523	3.48872	3.42352	4.48592	3.42352	4.48592	2.9933	3.51523	0.860343	5.30658	3.87805	3.51523	6.28922	5.89645	4.48928	6.72444	3.47794	6.24168	0.826827	3.11184	2.4668	3.11184	3.11184		0.484362	0.436412	0.186496	0.597118	0.0381279	0.35292	0.174694	0.191889	1.72383	0.0216006	-0.0310542	2.37211	2.45999	3.12562	0.496017	0.799748	0.0216006	0.799748	0.0619084	-0.21747	0.280432	-0.500742	-0.403209	1.06258	1.48356
295	3.47532	3.53655	3.38288	4.68442	3.38288	4.68442	3.41995	3.47532	0.836896	5.31368	3.93519	3.47532	6.34099	6.36683	4.44811	7.03817	3.52433	6.16945	0.780278	2.05744	2.42378	2.05744	2.05744		0.516165	0.407487	0.212729	0.643481	-0.0999282	0.334078	0.178015	0.219048	1.59073	-0.0207887	0.0286372	2.35163	2.25461	3.0912	0.502061	0.709116	-0.0207887	0.709116	0.0778317	-0.193013	0.328458	-0.532555	-0.409557	0.966431	1.60494
296	3.48851	3.42937	3.46519	4.40851	3.46519	4.40851	3.29103	3.48851	0.843279	5.24601	3.93316	3.48851	6.23667	6.50724	4.51366	6.77169	3.51985	6.01396	0.842291	3.19735	2.21411	3.19735	3.19735		0.528457	0.470227	0.172099	0.679153	0.00819698	0.343632	0.161922	0.242913	1.76869	-0.00561775	0.0298237	2.25625	2.29602	3.17966	0.548607	0.658345	-0.00561775	0.658345	0.0161708	-0.233552	0.199311	-0.462243	-0.463941	1.06994	1.57103
297	3.40614	3.5226	3.43017	4.55473	3.43017	4.55473	3.04413	3.40614	0.82969	4.91633	3.91822	3.40614	6.24301	6.51669	4.24524	6.65523	3.47376	6.07501	0.765674	2.77328	2.80886	2.77328	2.77328		0.49424	0.441474	0.19011	0.687651	-0.0029824	0.332369	0.185716	0.204653	1.59077	-0.0735394	-0.0227981	2.30204	2.31988	3.05036	0.581252	0.739119	-0.0735394	0.739119	0.0193854	-0.238218	0.300778	-0.587937	-0.467068	0.930359	1.49839
298	3.68347	3.48171	3.38848	4.59599	3.38848	4.59599	3.12331	3.68347	0.834637	5.07095	3.96873	3.68347	6.09952	6.39818	4.41411	6.25428	3.42768	6.21537	0.803187	2.00892	2.63427	2.00892	2.00892		0.483755	0.387107	0.224724	0.867405	0.00615312	0.302873	0.105412	0.375442	1.77754	0.00688326	0.063936	2.41207	2.32166	3.04275	0.561695	0.81513	0.00688326	0.81513	0.0468837	-0.178352	0.254932	-0.522782	-0.467282	0.942639	1.50054
299	3.42031	3.52663	3.43219	4.6132	3.43219	4.6132	3.05425	3.42031	0.856681	4.79866	3.87146	3.42031	6.40684	6.11607	4.39494	7.04242	3.43884	6.1857	0.862479	2.0159	2.0046	2.0159	2.0159		0.460298	0.43997	0.174228	0.835192	0.0500587	0.362507	0.124214	0.315256	1.83369	-0.00754064	0.0280637	2.27018	2.19376	3.16882	0.532975	0.719272	-0.00754064	0.719272	0.0975923	-0.188648	0.258747	-0.577726	-0.436378	0.867724	1.4211
[truncated: 270 more columns]

## Sheet: Panel C
Replicate	Treatment	Peak
WT	Baseline	0.0729355
WT	Baseline	0.130721
WT	Baseline	0.0439458
WT	Baseline	0.0420545
WT	Baseline	0.0801896
WT	Baseline	0.0472181
WT	Baseline	0.0569066
WT	Baseline	0.0473509
WT	Baseline	0.0558831
WT	Baseline	0.0390163
WT	Baseline	0.214678
WT	Baseline	0.0268663
WT	Baseline	0.118779
WT	Baseline	0.0710376
WT	Baseline	0.133086
WT	Baseline	0.0974425
WT	Baseline	0.0476078
WT	Baseline	0.144216
WT	Baseline	0.0650534
WT	Baseline	0.053739
WT	Baseline	0.0683814
WT	Baseline	0.277784
WT	Baseline	0.658344
WT	Baseline	0.0920777
WT	Baseline	0.189862
WT	Baseline	0.0657984
WT	Baseline	0.100407
WT	Baseline	0.131127
WT	Baseline	0.133959
WT	Baseline	0.0849934
WT	Baseline	0.0354205
WT	Baseline	0.0929499
WT	Baseline	0.138282
WT	Baseline	0.166894
WT	Baseline	0.138282
WT	Baseline	0.166894
WT	Baseline	0.171297
WT	Baseline	0.133959
WT	Baseline	0.0454985
WT	Baseline	0.0586379
WT	Baseline	0.157563
WT	Baseline	0.186617
WT	Baseline	0.133959
WT	Baseline	0.111115
WT	Baseline	0.199487
WT	Baseline	0.124235
WT	Baseline	0.034906
WT	Baseline	0.168723
WT	Baseline	0.095274
WT	Baseline	0.168721
WT	Baseline	0.187579
WT	Baseline	0.100179
WT	Baseline	0.0975187
WT	Baseline	0.0444656
WT	Baseline	0.141626
WT	Baseline	0.0646112
WT	Baseline	0.110501
WT	Baseline	0.0956262
WT	Baseline	0.165676
WT	Baseline	0.147412
WT	Baseline	1.03539
WT	Baseline	0.819255
WT	Baseline	0.554535
WT	Baseline	0.654519
WT	Baseline	0.358179
WT	Baseline	0.664456
WT	Baseline	0.664456
WT	Baseline	0.37232
WT	Baseline	0.383807
WT	Baseline	0.385747
WT	Baseline	0.929618
WT	Baseline	0.441925
WT	Baseline	0.607807
WT	Baseline	0.223765
WT	Baseline	0.31861
WT	Baseline	0.37829
WT	Baseline	0.532286
WT	Baseline	0.302963
WT	Baseline	0.230098
WT	Baseline	0.43441
WT	Baseline	0.284021
WT	Baseline	0.156114
WT	Baseline	0.145355
WT	Baseline	0.519143
WT	Baseline	0.346448
WT	Baseline	0.610428
WT	Baseline	0.519143
WT	Baseline	0.346448
WT	Baseline	0.610428
WT	Baseline	0.374805
WT	Baseline	0.819255
WT	Baseline	0.554535
WT	Baseline	0.554535
WT	Baseline	0.358179
WT	Baseline	1.03539
WT	Baseline	1.03539
WT	Baseline	0.383807
WT	Baseline	0.654519
WT	Baseline	0.374689
WT	Baseline	0.664456
WT	Baseline	0.664456
WT	Baseline	0.929618
WT	Baseline	0.667342
WT	Baseline	0.607807
WT	Baseline	0.37232
WT	Baseline	0.223765
WT	Baseline	0.385747
WT	Baseline	0.37829
WT	Baseline	0.37829
WT	Baseline	0.441925
WT	Baseline	0.441925
WT	Baseline	0.230098
WT	Baseline	0.32053
WT	Baseline	0.19741
WT	Baseline	0.532286
WT	Baseline	0.532286
WT	Baseline	0.302963
WT	Baseline	0.43441
WT	Baseline	0.284021
WT	Baseline	0.610428
WT	Baseline	0.156114
WT	Baseline	0.519143
WT	Baseline	0.346448
WT	Baseline	0.610428
WT	KCl	1.64197
WT	KCl	0.69883
WT	KCl	0.369772
WT	KCl	0.384838
WT	KCl	0.330587
WT	KCl	0.290235
WT	KCl	0.206214
WT	KCl	0.124597
WT	KCl	0.260808
WT	KCl	0.156932
WT	KCl	0.314028
WT	KCl	0.0935974
WT	KCl	0.262476
WT	KCl	0.51769
WT	KCl	0.916073
WT	KCl	0.255945
WT	KCl	0.234489
WT	KCl	0.170273
WT	KCl	0.447183
WT	KCl	0.385211
WT	KCl	0.484788
WT	KCl	4.54992
WT	KCl	0.938053
WT	KCl	4.7915
WT	KCl	3.95327
WT	KCl	0.742186
WT	KCl	1.39991
WT	KCl	1.45128
WT	KCl	4.42958
WT	KCl	0.482475
WT	KCl	0.1962
WT	KCl	3.58195
WT	KCl	3.49259
WT	KCl	4.7336
WT	KCl	3.49259
WT	KCl	4.7336
WT	KCl	4.96083
WT	KCl	4.42958
WT	KCl	0.399448
WT	KCl	1.64488
WT	KCl	6.02095
WT	KCl	4.29919
WT	KCl	4.42958
WT	KCl	8.74641
WT	KCl	8.63542
WT	KCl	7.11148
WT	KCl	0.23881
WT	KCl	8.92646
WT	KCl	3.6009
WT	KCl	6.60085
WT	KCl	1.29736
WT	KCl	1.61103
WT	KCl	1.16383
WT	KCl	0.440908
WT	KCl	0.2116
WT	KCl	0.348792
WT	KCl	0.2951
WT	KCl	0.298356
WT	KCl	0.380756
WT	KCl	0.364265
WT	KCl	12.9366
WT	KCl	7.84886
WT	KCl	6.46265
WT	KCl	1.23851
WT	KCl	1.59284
WT	KCl	11.2548
WT	KCl	11.2548
WT	KCl	2.55439
WT	KCl	2.21626
WT	KCl	1.03881
WT	KCl	7.76341
WT	KCl	3.72442
WT	KCl	3.33875
WT	KCl	1.23594
WT	KCl	0.873734
WT	KCl	4.14347
WT	KCl	2.84493
WT	KCl	2.39796
WT	KCl	0.851655
WT	KCl	1.1041
WT	KCl	1.18173
WT	KCl	2.19198
WT	KCl	0.751606
WT	KCl	4.61925
WT	KCl	2.00008
WT	KCl	1.85651
WT	KCl	4.61925
WT	KCl	2.00008
WT	KCl	1.85651
WT	KCl	1.02693
WT	KCl	7.84886
WT	KCl	6.46265
WT	KCl	6.46265
WT	KCl	1.59284
WT	KCl	12.9366
WT	KCl	12.9366
WT	KCl	2.21626
WT	KCl	1.23851
WT	KCl	0.400547
WT	KCl	11.2548
WT	KCl	11.2548
WT	KCl	7.76341
WT	KCl	6.28305
WT	KCl	3.33875
WT	KCl	2.55439
WT	KCl	1.23594
WT	KCl	1.03881
WT	KCl	4.14347
WT	KCl	4.14347
WT	KCl	3.72442
WT	KCl	3.72442
WT	KCl	0.851655
WT	KCl	1.23757
WT	KCl	1.08543
WT	KCl	2.84493
WT	KCl	2.84493
WT	KCl	2.39796
WT	KCl	1.1041
WT	KCl	1.18173
WT	KCl	1.85651
WT	KCl	2.19198
WT	KCl	4.61925
WT	KCl	2.00008
WT	KCl	1.85651
E180A	Baseline	0.0496182
E180A	Baseline	0.245346
E180A	Baseline	0.189439
E180A	Baseline	0.0856787
E180A	Baseline	0.137869
E180A	Baseline	0.117149
E180A	Baseline	0.142835
E180A	Baseline	0.37024
E180A	Baseline	0.195426
E180A	Baseline	0.0647831
E180A	Baseline	0.0748025
E180A	Baseline	0.101245
E180A	Baseline	0.198384
E180A	Baseline	0.152815
E180A	Baseline	0.0903371
E180A	Baseline	0.0874729
E180A	Baseline	0.0647831
E180A	Baseline	0.0874729
E180A	Baseline	0.128056
E180A	Baseline	0.0952918
E180A	Baseline	0.117068
E180A	Baseline	0.106465
E180A	Baseline	0.0634569
E180A	Baseline	0.0869548
E180A	Baseline	0.109171
E180A	Baseline	0.0521264
E180A	Baseline	0.0574753
E180A	Baseline	0.076056
E180A	Baseline	0.0164268
E180A	Baseline	0.0521264
E180A	Baseline	0.0630523
E180A	Baseline	0.123422
E180A	Baseline	0.0787758
E180A	Baseline	0.0521264
E180A	Baseline	0.0648344
E180A	Baseline	0.0507844
E180A	Baseline	0.0431148
E180A	Baseline	0.0238034
E180A	Baseline	0.0512686
E180A	Baseline	0.200312
E180A	Baseline	0.226317
E180A	Baseline	0.186341
E180A	Baseline	0.208001
E180A	Baseline	0.253132
E180A	Baseline	0.174082
E180A	Baseline	0.286722
E180A	Baseline	0.204859
E180A	Baseline	0.186006
E180A	Baseline	0.165185
E180A	Baseline	0.199772
E180A	Baseline	0.123357
E180A	Baseline	0.160379
E180A	Baseline	0.407733
E180A	Baseline	0.110998
E180A	Baseline	0.307092
E180A	Baseline	0.407733
E180A	Baseline	0.189979
E180A	Baseline	0.216792
E180A	Baseline	0.132729
E180A	Baseline	0.172701
E180A	Baseline	0.142023
E180A	Baseline	0.152927
E180A	Baseline	0.159088
E180A	Baseline	0.187627
E180A	Baseline	0.312759
E180A	Baseline	0.199426
E180A	Baseline	0.0870845
E180A	Baseline	0.163385
E180A	Baseline	0.0609504
E180A	Baseline	0.043058
E180A	Baseline	0.076568
E180A	Baseline	0.226649
E180A	Baseline	0.212183
E180A	Baseline	0.195528
E180A	Baseline	0.464629
E180A	Baseline	0.489127
E180A	Baseline	0.0531584
E180A	Baseline	0.312759
E180A	Baseline	0.199426
E180A	Baseline	0.0460866
E180A	Baseline	0.0276358
E180A	Baseline	0.0937244
E180A	Baseline	0.0675927
E180A	Baseline	0.0902475
E180A	Baseline	0.102344
E180A	Baseline	0.0733828
E180A	Baseline	0.0902475
E180A	Baseline	0.0530513
E180A	Baseline	0.0902475
E180A	Baseline	0.102344
E180A	Baseline	0.066182
E180A	Baseline	0.139525
E180A	Baseline	0.109976
E180A	Baseline	0.0884408
E180A	Baseline	0.101624
E180A	Baseline	0.155183
E180A	Baseline	0.146338
E180A	Baseline	0.129492
E180A	Baseline	0.105168
E180A	Baseline	0.0884424
E180A	Baseline	0.0736303
E180A	Baseline	0.122841
E180A	Baseline	0.0845694
E180A	Baseline	0.0972541
E180A	Baseline	0.0872894
E180A	Baseline	0.0640003
E180A	Baseline	0.0990701
E180A	Baseline	0.0902475
E180A	Baseline	0.0534245
E180A	Baseline	0.0292476
E180A	Baseline	0.0545212
E180A	Baseline	0.0621926
E180A	Baseline	0.0418247
E180A	Baseline	0.0277659
E180A	Baseline	0.0420714
E180A	Baseline	0.0442293
E180A	Baseline	0.0325881
E180A	Baseline	0.0378175
E180A	Baseline	0.0390229
E180A	Baseline	0.0286838
E180A	Baseline	0.0653421
E180A	Baseline	0.0686291
E180A	Baseline	0.0813161
E180A	Baseline	0.0449095
E180A	Baseline	0.0860236
E180A	Baseline	0.0973391
E180A	Baseline	0.0882717
E180A	Baseline	0.112493
E180A	Baseline	0.0624376
E180A	Baseline	0.0949388
E180A	Baseline	0.260475
E180A	Baseline	0.15501
E180A	Baseline	0.203313
E180A	Baseline	0.136472
E180A	Baseline	0.0651235
E180A	Baseline	0.0917394
E180A	Baseline	0.0669101
E180A	Baseline	0.0398101
E180A	Baseline	0.0719876
E180A	Baseline	0.0532417
E180A	Baseline	0.152919
E180A	Baseline	0.0847699
E180A	Baseline	0.111317
E180A	Baseline	0.100751
E180A	Baseline	0.117594
E180A	Baseline	0.0234966
E180A	Baseline	0.0556774
E180A	Baseline	0.0402346
E180A	Baseline	0.0876933
E180A	Baseline	0.0663757
E180A	Baseline	0.0857229
E180A	Baseline	0.103917
E180A	Baseline	0.178011
E180A	Baseline	0.114701
E180A	Baseline	0.122557
E180A	Baseline	0.199686
E180A	Baseline	0.0764943
E180A	Baseline	0.0850029
E180A	Baseline	0.117694
E180A	Baseline	0.037158
E180A	Baseline	0.143435
E180A	Baseline	0.213416
E180A	Baseline	0.081927
E180A	Baseline	0.135047
E180A	Baseline	0.126176
E180A	Baseline	0.107305
E180A	Baseline	0.128631
E180A	Baseline	0.0653525
E180A	Baseline	0.0858841
E180A	Baseline	0.0629276
E180A	Baseline	0.0986428
E180A	Baseline	0.0658896
E180A	Baseline	0.110609
E180A	Baseline	0.0905488
E180A	Baseline	0.126176
E180A	Baseline	0.0952663
E180A	Baseline	0.0980625
E180A	Baseline	0.271203
E180A	Baseline	0.0340219
E180A	Baseline	0.12471
E180A	Baseline	0.088527
E180A	Baseline	0.0713234
E180A	Baseline	0.0481435
E180A	Baseline	0.0425856
E180A	Baseline	0.0675838
E180A	Baseline	0.0630265
E180A	Baseline	0.0510324
E180A	Baseline	0.0871999
E180A	Baseline	0.0546402
E180A	Baseline	0.12732
E180A	Baseline	0.139837
E180A	Baseline	0.0925235
E180A	Baseline	0.0680746
E180A	Baseline	0.105898
E180A	Baseline	0.106913
E180A	Baseline	0.205868
E180A	Baseline	0.0871999
E180A	Baseline	0.0826492
E180A	Baseline	0.0747006
E180A	Baseline	0.0364433
E180A	Baseline	0.034384
E180A	Baseline	0.0490775
E180A	Baseline	0.0721483
E180A	Baseline	0.174776
E180A	Baseline	0.133948
E180A	Baseline	0.209392
E180A	Baseline	0.0729576
E180A	Baseline	0.102586
E180A	Baseline	0.259258
E180A	Baseline	0.247851
E180A	Baseline	0.084324
E180A	Baseline	0.188128
E180A	Baseline	0.0826492
E180A	Baseline	0.0826492
E180A	Baseline	0.185249
E180A	Baseline	0.189428
E180A	Baseline	0.111644
E180A	Baseline	0.126308
E180A	Baseline	0.152787
E180A	Baseline	0.16369
E180A	Baseline	0.0977112
E180A	Baseline	0.129383
E180A	Baseline	0.260902
E180A	KCl	0.57889
E180A	KCl	0.505779
E180A	KCl	0.228234
E180A	KCl	0.867405
E180A	KCl	0.248428
E180A	KCl	0.371626
E180A	KCl	0.418912
E180A	KCl	0.375442
E180A	KCl	1.83667
E180A	KCl	0.104462
E180A	KCl	0.129273
E180A	KCl	2.41207
E180A	KCl	2.5251
E180A	KCl	3.35301
E180A	KCl	0.662954
E180A	KCl	0.831809
E180A	KCl	0.104462
E180A	KCl	0.831809
E180A	KCl	0.760379
E180A	KCl	0.755903
E180A	KCl	0.344488
E180A	KCl	0.168726
E180A	KCl	0.121879
E180A	KCl	1.20426
E180A	KCl	1.60494
E180A	KCl	0.433795
E180A	KCl	0.890991
E180A	KCl	0.274107
E180A	KCl	0.0188564
E180A	KCl	0.433795
E180A	KCl	0.193999
E180A	KCl	0.11588
E180A	KCl	0.813817
E180A	KCl	0.433795
E180A	KCl	0.115147
E180A	KCl	0.0202686
E180A	KCl	0.435701
E180A	KCl	0.343511
E180A	KCl	0.114624
E180A	KCl	1.01163
E180A	KCl	0.842861
E180A	KCl	0.557131
E180A	KCl	0.465111
E180A	KCl	0.704576
E180A	KCl	0.54258
E180A	KCl	0.620476
E180A	KCl	0.634671
E180A	KCl	0.566323
E180A	KCl	0.509332
E180A	KCl	0.466836
E180A	KCl	0.395689
E180A	KCl	0.401784
E180A	KCl	0.919328
E180A	KCl	0.0772271
E180A	KCl	0.507576
E180A	KCl	0.919328
E180A	KCl	0.177343
E180A	KCl	0.392836
E180A	KCl	0.363208
E180A	KCl	0.479903
E180A	KCl	0.372768
E180A	KCl	0.494178
E180A	KCl	0.26812
E180A	KCl	0.191301
E180A	KCl	0.362762
E180A	KCl	0.081736
E180A	KCl	0.0586621
E180A	KCl	0.182153
E180A	KCl	0.0912503
E180A	KCl	0.0646804
E180A	KCl	0.137717
E180A	KCl	0.433243
E180A	KCl	0.568578
E180A	KCl	0.352266
E180A	KCl	1.07244
E180A	KCl	1.12314
E180A	KCl	0.0630319
E180A	KCl	0.362762
E180A	KCl	0.081736
E180A	KCl	0.120004
E180A	KCl	0.0551215
E180A	KCl	0.376961
E180A	KCl	0.18836
E180A	KCl	0.760152
E180A	KCl	0.546593
E180A	KCl	0.0446622
E180A	KCl	0.760152
E180A	KCl	0.037325
E180A	KCl	0.760152
E180A	KCl	0.546593
E180A	KCl	0.0001764
E180A	KCl	0.277196
E180A	KCl	0.2071
E180A	KCl	0.122459
E180A	KCl	0.154057
E180A	KCl	0.317535
E180A	KCl	0.283521
E180A	KCl	0.200104
E180A	KCl	0.164311
E180A	KCl	0.0225754
E180A	KCl	0.121224
E180A	KCl	0.0896542
E180A	KCl	0.0809293
E180A	KCl	0.226302
E180A	KCl	0.0375902
E180A	KCl	0.119336
E180A	KCl	0.108172
E180A	KCl	0.760152
E180A	KCl	0.412567
E180A	KCl	0.202097
E180A	KCl	0.523842
E180A	KCl	0.240907
E180A	KCl	0.20677
E180A	KCl	0.0756262
E180A	KCl	0.208761
E180A	KCl	0.0451142
E180A	KCl	0.0547637
E180A	KCl	0.0218964
E180A	KCl	0.0414953
E180A	KCl	0.315867
E180A	KCl	0.282125
E180A	KCl	0.703476
E180A	KCl	0.47573
E180A	KCl	0.598764
E180A	KCl	0.663759
E180A	KCl	0.517737
E180A	KCl	0.946737
E180A	KCl	1.77694
E180A	KCl	0.239315
E180A	KCl	1.83803
E180A	KCl	1.205
E180A	KCl	1.30333
E180A	KCl	1.26092
E180A	KCl	1.67052
E180A	KCl	-0.00692671
E180A	KCl	0.0197923
E180A	KCl	0.042124
E180A	KCl	0.00753118
E180A	KCl	-0.00558972
E180A	KCl	-0.00926322
E180A	KCl	0.12605
E180A	KCl	0.0467892
E180A	KCl	0.289083
E180A	KCl	1.56963
E180A	KCl	3.23423
E180A	KCl	0.162759
E180A	KCl	2.64851
E180A	KCl	0.04742
E180A	KCl	0.126423
E180A	KCl	0.22396
E180A	KCl	0.0824281
E180A	KCl	0.220229
E180A	KCl	0.343613
E180A	KCl	0.214207
E180A	KCl	0.209201
E180A	KCl	0.230981
E180A	KCl	0.0326522
E180A	KCl	0.580952
E180A	KCl	3.82255
E180A	KCl	0.216158
E180A	KCl	1.65914
E180A	KCl	3.72256
E180A	KCl	2.28733
E180A	KCl	4.49644
E180A	KCl	0.61247
E180A	KCl	0.525319
E180A	KCl	0.236606
E180A	KCl	0.207568
E180A	KCl	0.0201225
E180A	KCl	0.754249
E180A	KCl	0.0200776
E180A	KCl	1.00972
E180A	KCl	0.628952
E180A	KCl	0.166409
E180A	KCl	0.61247
E180A	KCl	0.534711
E180A	KCl	0.593727
E180A	KCl	1.8445
E180A	KCl	0.0618759
E180A	KCl	0.0273854
E180A	KCl	0.0328901
E180A	KCl	0.0500314
E180A	KCl	0.112188
E180A	KCl	0.125228
E180A	KCl	0.113145
E180A	KCl	0.0791769
E180A	KCl	0.0510324
E180A	KCl	0.395053
E180A	KCl	0.240722
E180A	KCl	3.60996
E180A	KCl	1.27164
E180A	KCl	3.31749
E180A	KCl	0.0128572
E180A	KCl	0.00533761
E180A	KCl	0.363093
E180A	KCl	2.85437
E180A	KCl	0.395053
E180A	KCl	0.568152
E180A	KCl	0.046338
E180A	KCl	0.0114383
E180A	KCl	0.010686
E180A	KCl	0.0433406
E180A	KCl	0.67706
E180A	KCl	0.371791
E180A	KCl	0.58903
E180A	KCl	0.530659
E180A	KCl	0.32079
E180A	KCl	0.250417
E180A	KCl	0.777392
E180A	KCl	0.949533
E180A	KCl	0.46016
E180A	KCl	0.242134
E180A	KCl	0.568152
E180A	KCl	0.568152
E180A	KCl	0.142385
E180A	KCl	0.298524
E180A	KCl	0.277802
E180A	KCl	0.331519
E180A	KCl	0.252582
E180A	KCl	0.585199
E180A	KCl	0.287048
E180A	KCl	0.32266
E180A	KCl	0.390251
Set2 RNAi	Baseline	0.0516909
Set2 RNAi	Baseline	0.0703128
Set2 RNAi	Baseline	0.0422698
Set2 RNAi	Baseline	0.0738399
Set2 RNAi	Baseline	0.0438149
Set2 RNAi	Baseline	0.0365759
Set2 RNAi	Baseline	0.0871359
Set2 RNAi	Baseline	0.0349349
Set2 RNAi	Baseline	0.0719097
Set2 RNAi	Baseline	0.0719097
Set2 RNAi	Baseline	0.0457
Set2 RNAi	Baseline	0.02914
Set2 RNAi	Baseline	0.0690507
Set2 RNAi	Baseline	0.0590358
Set2 RNAi	Baseline	0.0903532
Set2 RNAi	Baseline	0.0501546
Set2 RNAi	Baseline	0.0205249
Set2 RNAi	Baseline	0.0433101
Set2 RNAi	Baseline	0.0205034
Set2 RNAi	Baseline	0.033449
Set2 RNAi	Baseline	0.0133698
Set2 RNAi	Baseline	0.0636717
Set2 RNAi	Baseline	0.0367615
Set2 RNAi	Baseline	0.039639
Set2 RNAi	Baseline	0.0233001
Set2 RNAi	Baseline	0.0376032
Set2 RNAi	Baseline	0.038784
Set2 RNAi	Baseline	0.027954
Set2 RNAi	Baseline	0.0468713
Set2 RNAi	Baseline	0.0579076
Set2 RNAi	Baseline	0.0404085
Set2 RNAi	Baseline	0.0579076
Set2 RNAi	Baseline	0.0669503
Set2 RNAi	Baseline	0.06336
Set2 RNAi	Baseline	0.0783158
Set2 RNAi	Baseline	0.0416572
Set2 RNAi	Baseline	0.0369004
Set2 RNAi	Baseline	0.0378296
Set2 RNAi	Baseline	0.0429088
Set2 RNAi	Baseline	0.0416572
Set2 RNAi	Baseline	0.0364001
Set2 RNAi	Baseline	0.0609096
Set2 RNAi	Baseline	0.0377712
Set2 RNAi	Baseline	0.0267463
Set2 RNAi	Baseline	0.0558241
Set2 RNAi	Baseline	0.107985
Set2 RNAi	Baseline	0.0609117
Set2 RNAi	Baseline	0.128756
Set2 RNAi	Baseline	0.184117
Set2 RNAi	Baseline	0.128756
Set2 RNAi	Baseline	0.114195
Set2 RNAi	Baseline	0.247663
Set2 RNAi	Baseline	0.14982
Set2 RNAi	Baseline	0.149404
Set2 RNAi	Baseline	0.0937439
Set2 RNAi	Baseline	0.0471904
Set2 RNAi	Baseline	0.0696157
Set2 RNAi	Baseline	0.0205189
Set2 RNAi	Baseline	0.0409721
Set2 RNAi	Baseline	0.051104
Set2 RNAi	Baseline	0.0192665
Set2 RNAi	Baseline	0.0518813
Set2 RNAi	Baseline	0.0927853
Set2 RNAi	Baseline	0.0411109
Set2 RNAi	Baseline	0.0518813
Set2 RNAi	Baseline	0.0398864
Set2 RNAi	Baseline	0.0759856
Set2 RNAi	Baseline	0.10982
Set2 RNAi	Baseline	0.0574946
Set2 RNAi	Baseline	0.121636
Set2 RNAi	Baseline	0.0964722
Set2 RNAi	Baseline	0.141971
Set2 RNAi	Baseline	0.0649394
Set2 RNAi	Baseline	0.0497955
Set2 RNAi	Baseline	0.0428147
Set2 RNAi	Baseline	0.107354
Set2 RNAi	Baseline	0.107354
Set2 RNAi	Baseline	0.0751336
Set2 RNAi	Baseline	0.0751336
Set2 RNAi	Baseline	0.103647
Set2 RNAi	Baseline	0.0585411
Set2 RNAi	Baseline	0.0778385
Set2 RNAi	Baseline	0.170832
Set2 RNAi	Baseline	0.080103
Set2 RNAi	Baseline	0.0518133
Set2 RNAi	Baseline	0.0677913
Set2 RNAi	Baseline	0.0744674
Set2 RNAi	KCl	0.591589
Set2 RNAi	KCl	0.352519
Set2 RNAi	KCl	0.283578
Set2 RNAi	KCl	0.837104
Set2 RNAi	KCl	0.752295
Set2 RNAi	KCl	0.0695915
Set2 RNAi	KCl	0.77672
Set2 RNAi	KCl	0.098548
Set2 RNAi	KCl	0.436253
Set2 RNAi	KCl	0.436253
Set2 RNAi	KCl	0.42645
Set2 RNAi	KCl	0.0937628
Set2 RNAi	KCl	1.01547
Set2 RNAi	KCl	0.619507
Set2 RNAi	KCl	0.840574
Set2 RNAi	KCl	0.0747995
Set2 RNAi	KCl	0.0939294
Set2 RNAi	KCl	0.1127
Set2 RNAi	KCl	0.378647
Set2 RNAi	KCl	0.797876
Set2 RNAi	KCl	0.46973
Set2 RNAi	KCl	1.60034
Set2 RNAi	KCl	0.510704
Set2 RNAi	KCl	1.99023
Set2 RNAi	KCl	0.566127
Set2 RNAi	KCl	0.0747415
Set2 RNAi	KCl	0.15563
Set2 RNAi	KCl	0.0312094
Set2 RNAi	KCl	0.0548957
Set2 RNAi	KCl	0.018901
Set2 RNAi	KCl	0.154203
Set2 RNAi	KCl	0.018901
Set2 RNAi	KCl	0.0297891
Set2 RNAi	KCl	0.057392
Set2 RNAi	KCl	0.164671
Set2 RNAi	KCl	0.394036
Set2 RNAi	KCl	0.545751
Set2 RNAi	KCl	0.55213
Set2 RNAi	KCl	0.801806
Set2 RNAi	KCl	0.394036
Set2 RNAi	KCl	0.239478
Set2 RNAi	KCl	1.05159
Set2 RNAi	KCl	0.600393
Set2 RNAi	KCl	0.0420715
Set2 RNAi	KCl	0.010014
Set2 RNAi	KCl	1.04338
Set2 RNAi	KCl	0.0421536
Set2 RNAi	KCl	0.0962814
Set2 RNAi	KCl	1.06905
Set2 RNAi	KCl	0.0962814
Set2 RNAi	KCl	0.0876117
Set2 RNAi	KCl	0.15784
Set2 RNAi	KCl	0.447082
Set2 RNAi	KCl	0.131326
Set2 RNAi	KCl	0.253692
Set2 RNAi	KCl	0.121385
Set2 RNAi	KCl	0.0480988
Set2 RNAi	KCl	0.682726
Set2 RNAi	KCl	0.293924
Set2 RNAi	KCl	0.966424
Set2 RNAi	KCl	0.687213
Set2 RNAi	KCl	0.800604
Set2 RNAi	KCl	0.368149
Set2 RNAi	KCl	0.755433
Set2 RNAi	KCl	0.800604
Set2 RNAi	KCl	0.392996
Set2 RNAi	KCl	0.296293
Set2 RNAi	KCl	0.654226
Set2 RNAi	KCl	0.167651
Set2 RNAi	KCl	1.25322
Set2 RNAi	KCl	1.49237
Set2 RNAi	KCl	1.01803
Set2 RNAi	KCl	0.117972
Set2 RNAi	KCl	2.13277
Set2 RNAi	KCl	2.03148
Set2 RNAi	KCl	0.546148
Set2 RNAi	KCl	0.546148
Set2 RNAi	KCl	0.167251
Set2 RNAi	KCl	0.167251
Set2 RNAi	KCl	0.419854
Set2 RNAi	KCl	0.348587
Set2 RNAi	KCl	0.00521012
Set2 RNAi	KCl	0.316365
Set2 RNAi	KCl	0.444377
Set2 RNAi	KCl	0.418655
Set2 RNAi	KCl	0.295035
Set2 RNAi	KCl	0.21266
E180A;Set2OE	Baseline	0.186004
E180A;Set2OE	Baseline	0.0958231
E180A;Set2OE	Baseline	0.121943
E180A;Set2OE	Baseline	0.139139
E180A;Set2OE	Baseline	0.0810383
E180A;Set2OE	Baseline	0.121494
E180A;Set2OE	Baseline	0.0527656
E180A;Set2OE	Baseline	0.0857862
E180A;Set2OE	Baseline	0.0823588
E180A;Set2OE	Baseline	0.0544525
E180A;Set2OE	Baseline	0.0875815
E180A;Set2OE	Baseline	0.183857
E180A;Set2OE	Baseline	0.376696
E180A;Set2OE	Baseline	0.0868697
E180A;Set2OE	Baseline	0.0475584
E180A;Set2OE	Baseline	0.196009
E180A;Set2OE	Baseline	0.0782236
E180A;Set2OE	Baseline	0.0656874
E180A;Set2OE	Baseline	0.047613
E180A;Set2OE	Baseline	0.0994364
E180A;Set2OE	Baseline	0.0868697
E180A;Set2OE	Baseline	0.0868697
E180A;Set2OE	Baseline	0.0868697
E180A;Set2OE	Baseline	0.0868697
E180A;Set2OE	Baseline	0.156952
E180A;Set2OE	Baseline	0.212877
E180A;Set2OE	Baseline	0.0995176
E180A;Set2OE	Baseline	0.243765
E180A;Set2OE	Baseline	0.108331
E180A;Set2OE	Baseline	0.149727
E180A;Set2OE	Baseline	0.0253437
E180A;Set2OE	KCl	0.862378
E180A;Set2OE	KCl	0.358999
E180A;Set2OE	KCl	0.731474
E180A;Set2OE	KCl	0.834341
E180A;Set2OE	KCl	0.387879
E180A;Set2OE	KCl	0.701258
E180A;Set2OE	KCl	0.178063
E180A;Set2OE	KCl	0.721541
E180A;Set2OE	KCl	0.839828
E180A;Set2OE	KCl	0.299056
E180A;Set2OE	KCl	0.129493
E180A;Set2OE	KCl	0.657566
E180A;Set2OE	KCl	0.239063
E180A;Set2OE	KCl	6.7072
E180A;Set2OE	KCl	0.532782
E180A;Set2OE	KCl	2.18992
E180A;Set2OE	KCl	0.270563
E180A;Set2OE	KCl	0.256694
E180A;Set2OE	KCl	0.502992
E180A;Set2OE	KCl	4.08952
E180A;Set2OE	KCl	6.7072
E180A;Set2OE	KCl	6.7072
E180A;Set2OE	KCl	6.7072
E180A;Set2OE	KCl	6.7072
E180A;Set2OE	KCl	2.56759
E180A;Set2OE	KCl	10.5922
E180A;Set2OE	KCl	2.72123
E180A;Set2OE	KCl	5.04506
E180A;Set2OE	KCl	2.84448
E180A;Set2OE	KCl	1.31253
E180A;Set2OE	KCl	2.1455

## Sheet: Panel E
Time	WT-1	WT-2	WT-3	WT-4	WT-5	WT-6	WT-7	WT-8	WT-9	WT-10	WT-11	WT-12	WT-13	WT-14	WT-15	WT-16	WT-17	WT-18	WT-19	WT-20	WT-21	WT-22	WT-23		TTX-1	TTX-2	TTX-3	TTX-4	TTX-5	TTX-6	TTX-7	TTX-8	TTX-9	TTX-10	TTX-11	TTX-12	TTX-13	TTX-14	TTX-15	TTX-16		NI-1	NI-2	NI-3	NI-4	NI-5	NI-6	NI-7	NI-8
1	0.0781488	-0.0282788	0.0429872	-0.035244	0.0429872	-0.035244	-0.00534291	0.0781488	-0.0424609	-0.0291578	-0.0698117	0.0781488	-0.0250502	-0.0621321	-0.0727935	0.0696437	-0.0621941	-0.0488821	-0.0898393	-0.351914	0.138213	-0.351914	-0.351914		0.505494	1.19005	-0.312921	-0.0230798	-0.0649133	0.0854189	-0.0968899	0.0202121	-0.232526	-0.141476	0.0691873	-0.0467454	0.0495477	0.0401883	-0.188568	-0.0279307		0.126344	0.184409	0.166536	0.147334	0.0768573	0.216154	0.0918573	0.132068
2	-0.041056	0.0251998	-0.0483028	-0.086984	-0.0483028	-0.086984	0.0206505	-0.041056	-0.00992545	0.10843	0.00639183	-0.041056	0.0405573	-0.0813269	0.0422015	0.0693915	0.00271181	0.0552381	-0.0981917	-0.0765266	-0.140208	-0.0765266	-0.0765266		0.460654	1.15038	-0.339934	-0.0203087	0.0355882	0.0245622	-0.00999013	0.043067	-0.154894	-0.147703	0.0568118	-0.0755573	0.0280803	0.0955008	-0.0564849	-0.0596697		0.156021	0.20906	0.113948	0.119324	0.19726	0.0789498	0.160441	0.237204
3	-0.000408826	0.0225727	-0.00380884	0.00749504	-0.00380884	0.00749504	0.0537576	-0.000408826	0.0208474	-0.115014	0.0137921	-0.000408826	0.0405573	0.0325606	-0.0242959	-0.168792	-0.0604039	0.0235477	-0.0987644	-0.448881	0.26021	-0.448881	-0.448881		0.412004	1.09782	-0.296232	-0.000133565	-0.0301481	0.0507374	-0.000229117	-0.03247	-0.264997	-0.0892547	0.0422811	-0.0699869	0.0443319	0.0214031	-0.126916	-0.0156098		0.24157	0.143539	0.241284	0.101957	0.226321	0.259467	0.053412	0.14632
4	-0.0661397	0.0501327	-0.0248785	-0.0446877	-0.0248785	-0.0446877	0.0630054	-0.0661397	-0.101132	-0.0970561	-0.046432	-0.0661397	0.01162	0.042109	-0.0617732	0.0161077	-0.0089781	-0.181655	-0.0786398	-0.264083	0.0973673	-0.264083	-0.264083		0.395151	1.01125	-0.33759	-0.0259355	-0.00355162	-0.0981147	0.0980826	-0.017975	-0.261041	-0.136496	0.0498562	-0.0927677	0.0258515	0.0848495	-0.114569	-0.0720633		0.187539	0.197751	0.0869799	0.0971943	0.00549076	0.0945316	0.0491492	0.107641
5	-0.0928926	-0.0218871	-0.0487478	-0.100852	-0.0487478	-0.100852	-0.1909	-0.0928926	0.0038177	-0.0234996	-0.14857	-0.0928926	-0.0938434	-0.159134	0.0181431	-0.0411692	-0.121672	-0.0791805	-0.056845	-0.161772	0.326022	-0.161772	-0.161772		0.367881	0.865497	-0.240652	-0.0339051	-0.0520049	-0.00288383	0.243342	0.0172712	-0.21793	-0.12599	0.042053	-0.0940634	0.04431	0.0373762	-0.0783651	-0.129228		0.0770647	0.0488193	0.0612683	0.161749	0.137457	0.16878	0.0278378	0.0380638
6	0.00657282	-0.0416543	0.00631882	0.0323315	0.00631882	0.0323315	-0.0996811	0.00657282	-0.0258769	-0.0699808	0.0294066	0.00657282	0.0867205	0.125017	-0.0302636	0.168723	0.0220247	0.0348712	-0.078783	0.0108733	0.322703	0.0108733	0.0108733		0.360186	0.84975	-0.241763	0.0279318	-0.0245125	0.0109929	-0.181066	-0.0865399	-0.158156	-0.126061	-0.00851805	-0.113872	0.0390671	0.0741313	-0.112208	0.0218562		0.132587	0.0809958	0.0535772	0.0726321	0.190102	0.142305	0.103495	-0.0872102
7	-0.0482041	0.0425802	0.0569635	0.0265285	0.0569635	0.0265285	0.0045629	-0.0482041	0.0343682	-0.0493656	0.037577	-0.0482041	0.0206271	0.0346906	0.017228	0.0711697	0.00990833	0.0940789	-0.0720378	-0.0552369	0.117111	-0.0552369	-0.0552369		0.314373	0.826986	-0.282567	-0.0096209	-0.0179311	-0.163399	0.0529921	0.0158063	-0.227037	-0.0653943	0.0315943	-0.115362	0.0579587	0.118098	-0.0881668	-0.0480128		0.110261	0.0884217	0.0822863	0.0674469	0.0507652	0.0523625	0.138575	0.000964335
8	-0.0315695	-0.0941043	-0.120566	0.0243153	-0.120566	0.0243153	0.0821021	-0.0315695	-0.0161381	-0.079215	-0.0984437	-0.0315695	-0.0791112	-0.00639214	0.0383821	-0.0680634	0.0258184	-0.114036	-0.0462333	0.441925	0.37829	0.441925	0.441925		0.248107	0.603547	-0.268223	-0.00491954	-0.0637519	-0.134703	0.0625055	0.0843711	-0.154539	-0.0853277	0.054803	-0.11439	0.0483878	0.0922238	-0.138654	0.0331416		0.138306	0.0930697	0.122281	0.0638981	0.0369084	0.109999	0.0574607	0.0624904
9	-0.0415233	-0.0691272	0.00608413	-0.106066	0.00608413	-0.106066	0.0369017	-0.0415233	-0.0515661	0.0426657	-0.0637492	-0.0415233	-0.0266041	-0.185935	0.0433069	-0.0315277	-0.089424	-0.0725396	-0.0225449	-0.0439456	0.133047	-0.0439456	-0.0439456		0.237782	0.42551	-0.286699	0.0446906	-0.0083964	-0.08803	-0.127308	0.0458206	-0.13308	-0.130432	0.0589385	-0.0993989	0.0291649	0.0102072	-0.0884953	-0.0222554		0.0953668	0.0772931	0.104538	0.0942413	0.193192	0.0957332	-0.0133373	0.00796395
10	0.0325911	0.0170563	-0.012368	-0.0784256	-0.012368	-0.0784256	-0.100229	0.0325911	0.0349499	0.014892	-0.00226766	0.0325911	-0.0200126	-0.0122355	-0.122621	-0.000381939	-0.0207452	0.0646629	-0.108755	0.12982	0.0838789	0.12982	0.12982		0.196815	0.42455	-0.216019	0.0887322	0.00314037	-0.100943	-0.0336188	-0.0308178	-0.0355073	-0.0769587	0.0187069	-0.0963721	0.00257221	0.00135837	-0.130462	0.00567305		0.0547074	0.0403876	0.036131	0.100195	-0.0288919	0.147395	0.0339741	0.010927
11	-0.0392858	0.035882	-0.0575161	0.132811	-0.0575161	0.132811	-0.0569456	-0.0392858	0.0384588	0.065473	-0.0292572	-0.0392858	0.0514025	-0.0635195	0.016438	-0.0340627	0.0314979	0.057706	-0.0288928	-0.241759	0.102915	-0.241759	-0.241759		0.190415	0.151352	-0.272556	0.0132936	-0.0383666	0.00342937	0.0177039	-0.0154967	-0.185637	-0.116234	0.012319	-0.0812485	0.0232166	0.0645324	-0.0952564	0.00600455		-0.00547273	0.0127792	0.0022952	0.0577953	0.1812	-0.0196562	0.00805929	-0.0335792
12	0.0398047	-0.082108	-0.0221571	-0.158101	-0.0221571	-0.158101	-0.180066	0.0398047	-0.0367447	-0.0853905	-0.0436745	0.0398047	-0.0783365	-0.0676	-0.100518	-0.0195358	0.0576384	-0.0706409	-0.0832373	-0.387253	0.205983	-0.387253	-0.387253		0.155321	0.140254	-0.334572	-0.0248673	-0.0905088	-0.155815	-0.0262929	-0.0366995	-0.0748401	-0.0743017	0.0529692	-0.0745237	0.030844	0.0431437	-0.0224758	0.0412995		0.0503184	-0.0121542	-0.0131812	-0.00924041	-0.1009	0.150196	0.0765556	0.0149619
13	-0.117709	-0.100738	-0.0203501	-0.124214	-0.0203501	-0.124214	0.0196119	-0.117709	0.00816522	0.113564	0.0719284	-0.117709	-0.0211173	0.0135453	0.0446653	-0.0623535	-0.0154357	0.00172343	-0.0129519	-0.0960062	-0.0338209	-0.0960062	-0.0960062		0.132515	0.0126863	-0.29059	0.00462068	-0.0976211	-0.0281161	-0.018967	-0.0199906	-0.107311	-0.105302	0.0143446	-0.0762398	0.0130072	0.109745	-0.0227829	0.0412995		-0.0275766	-0.0772528	0.0242264	0.0149982	0.120725	0.0851825	-0.0844782	0.0165019
14	-0.015806	-0.0058417	0.0571738	-0.0544257	0.0571738	-0.0544257	0.108803	-0.015806	-0.0340582	-0.030658	-0.0411797	-0.015806	0.0493169	-0.00426211	-0.0278311	-0.081895	-0.0786874	-0.0477435	-0.0253613	-0.14505	0.160622	-0.14505	-0.14505		0.098572	0.0429056	-0.297346	-0.01474	-0.0613295	-0.206279	0.0315509	0.0289355	-0.127752	-0.0822961	0.0169457	-0.0599067	-0.000533542	0.0448428	-0.0482161	-0.00757398		-0.0127775	0.0108474	0.0989069	0.0208528	0.0905014	-0.0411554	0.0872539	0.0253723
15	0.0807864	0.0104893	-0.034615	0.0976473	-0.034615	0.0976473	-0.134702	0.0807864	0.0194615	0.0135082	0.0250868	0.0807864	-0.0546384	-0.0268845	0.010942	0.0234665	0.064096	-0.0192128	0.0302404	0.157919	0.30432	0.157919	0.157919		0.0503432	-0.108555	-0.264648	0.0304226	0.0212585	-0.0249595	-0.0898323	0.00837154	-0.11469	-0.0700236	0.0370155	0.00337377	-0.038778	0.0568063	-0.0609075	-0.0538723		-0.027244	-0.00704256	0.0115658	-0.0470011	0.0178809	0.133929	-0.100461	0.135909
16	-0.0338088	0.0526065	-0.0330184	-0.0362266	-0.0330184	-0.0362266	-0.0574898	-0.0338088	-0.0349131	-0.0955559	-0.0201524	-0.0338088	0.0732992	0.018646	-0.0296953	0.0624757	0.00142763	-0.133327	-0.0710828	0.211703	-0.0538372	0.211703	0.211703		0.0358973	-0.111999	-0.292021	-0.0247879	0.000192577	0.00752885	-0.128381	-0.0162237	-0.170524	-0.0876277	0.0288377	-0.00628513	-0.0208067	-0.0395034	0.0157985	0.0387707		-0.0281314	0.0554403	0.0166722	-0.0659311	-0.0375482	-0.0444706	0.0955653	-0.00149155
17	-0.0734205	-0.0170057	-0.0660227	0.0473812	-0.0660227	0.0473812	0.0829237	-0.0734205	0.0291485	-0.11438	-0.0495947	-0.0734205	0.0613906	-0.0935685	-0.0505027	0.151028	0.0586885	0.05587	-0.0663421	0.17283	0.0146403	0.17283	0.17283		-5.26e-05	-0.230979	-0.18642	-0.0420227	0.0336912	-0.0826597	-0.10015	0.00809618	-0.046503	-0.0969155	0.0695981	0.0243599	0.012803	0.027685	-0.0614084	0.00774198		-0.0663506	0.064234	-0.0347938	0.0596561	-0.00552043	0.0379253	0.0229352	0.0160728
18	0.0629517	-0.0351314	-0.118081	0.137582	-0.118081	0.137582	0.0714316	0.0629517	0.0467944	0.00230822	0.00535707	0.0629517	-0.0866836	0.00752245	-0.0607643	-0.00818376	0.0219475	0.00880843	-0.0807875	0.0819826	-0.0814655	0.0819826	0.0819826		-0.0195652	-0.24215	-0.0248012	-0.0533821	0.0142513	-0.0848734	0.0128131	0.0675741	-0.0331015	-0.0575462	0.0426193	0.0172643	-0.020715	-0.0147628	0.00123056	0.0124565		-0.0135064	0.0145295	-0.0491932	0.0294619	0.0346431	0.0237145	0.0574169	0.00342192
19	0.0444142	0.0273009	0.0157937	-0.0155222	0.0157937	-0.0155222	-0.0654251	0.0444142	0.0433028	-0.126097	-0.0511568	0.0444142	-0.0477215	0.199487	-0.0799605	-0.154966	0.000980377	-0.103535	0.008636	-0.00584821	-0.2473	-0.00584821	-0.00584821		-0.0229327	-0.282926	0.0468313	0.0234526	-0.00697504	-0.0552342	0.17681	-0.041656	0.012593	-0.0694383	0.0288559	0.0425027	-0.0380112	-0.0835515	-0.0437771	-0.0258923		-0.0546412	0.00700309	0.0597359	0.0222428	-0.0785999	0.0288619	-0.0687484	0.0229944
20	0.0571738	0.00525733	0.0257662	-0.0434571	0.0257662	-0.0434571	0.0523349	0.0571738	-0.0298305	0.0236154	-0.00210524	0.0571738	-0.0223458	-0.0552687	0.0559386	0.0652691	-0.0442414	0.0926215	0.0590674	0.0875852	-0.069011	0.0875852	0.0875852		-0.0523939	-0.294147	0.111272	-0.0294311	-0.0159788	0.207132	0.0193342	0.00727009	0.0565598	-0.0231338	0.00121099	0.0522749	-0.0234793	-0.0250606	0.0114879	-0.0276655		-0.00567932	0.0260406	-0.0673709	0.0166364	-0.0149735	-0.0544776	-0.0758676	0.040267
21	0.0450161	0.06075	0.0554464	0.09863	0.0554464	0.09863	0.0974214	0.0450161	-0.0740733	-0.0282913	0.0294066	0.0450161	-0.0453059	0.000936481	0.00601723	0.0420543	0.00206972	0.0280396	-0.118778	0.190672	-0.302887	0.190672	0.190672		-0.0244472	-0.297717	0.323386	0.0133518	-0.00776038	-0.0271527	0.0130814	0.0470102	0.13043	-0.0765842	-0.018457	0.0290728	-0.0281168	0.01797	0.0294426	-0.0425827		-0.0596163	-0.0939746	-0.0231181	-0.107364	0.0219189	-0.162291	0.109804	0.00999074
22	0.0525979	-0.0445007	0.000300194	0.00306865	0.000300194	0.00306865	0.0743873	0.0525979	-0.0350847	0.0588901	0.109663	0.0525979	0.0430921	0.0501803	-0.0910121	-0.0350779	0.095274	0.168721	0.00249503	-0.164271	-0.0593833	-0.164271	-0.164271		-0.0712077	-0.298182	0.320448	-0.0392781	0.138562	0.162366	-0.129207	-0.00162957	0.166663	-0.0756419	-0.0308688	0.0571198	-0.0102744	-0.035204	0.0574483	0.0298056		-0.0392873	-0.0697663	-0.0420518	-0.00484942	-0.069576	0.0473019	-0.0328603	-0.00772965
23	-0.137783	0.0298176	-0.026842	0.0875153	-0.026842	0.0875153	-0.0355476	-0.137783	-0.0504715	0.126439	0.000754489	-0.137783	-0.0765764	-0.183985	0.042929	-0.0445287	0.0376627	0.0236104	-0.0343336	-0.310886	-0.197424	-0.310886	-0.310886		-0.106431	-0.301529	0.57241	0.00851292	-0.121956	-0.0785602	-0.0157064	-0.0291657	0.337234	-0.0322812	-0.0295728	0.0676438	-0.0380112	-0.0982412	0.0304508	-0.0289631		-0.012081	-0.00291747	-0.0153575	0.0775435	-0.0277593	0.00293043	-0.00575091	0.0310066
24	-0.016707	0.0843688	0.138282	0.0260859	0.138282	0.0260859	-0.109587	-0.016707	0.0382365	-0.0111421	0.034657	-0.016707	0.0607351	0.0975715	-0.0236309	0.0364737	-0.087635	0.0315806	-0.0203815	-0.139706	-0.0406199	-0.139706	-0.139706		-0.129059	-0.320923	0.635185	0.0527184	-0.00802585	-0.0359871	-0.0822175	-0.00796287	0.328482	-0.052396	-0.0154905	0.0641217	-0.0421638	-0.0427869	0.0309126	0.0417593		-0.0348345	-0.0882796	-0.027078	-0.0789569	-0.0272088	-0.0353797	-0.110308	-0.0255094
25	-0.03608	0.0425152	0.00139927	0.0149712	0.00139927	0.0149712	0.171297	-0.03608	-0.0197495	0.0105077	0.0103648	-0.03608	0.0366703	0.0364534	-0.00282351	-0.0641317	-0.00598333	0.036767	0.0412652	0.398484	0.313294	0.398484	0.398484		-0.174265	-0.348309	0.518499	0.0125109	0.02289	-0.124597	-0.0819492	-0.00558375	0.42725	-0.00106424	-0.0218525	0.120837	-0.0193503	-0.0787617	0.0171074	-0.0138365		-0.0834314	0.0205671	-0.0659282	-0.175343	-0.0131075	-0.100592	-0.0350769	-0.019329
26	0.010947	0.013554	-0.00344333	0.0402503	-0.00344333	0.0402503	0.0346574	0.010947	0.00510202	-0.00877537	0.060004	0.010947	0.03761	0.0259746	0.0483596	-0.0461161	-0.0229043	0.0604899	0.0442719	-0.104022	-0.130526	-0.104022	-0.104022		-0.213915	-0.356528	0.535184	-0.0298806	-0.0256739	-0.00634789	-0.0404082	-0.023295	0.32401	0.0137893	-0.022126	0.0760931	-0.0160696	-0.052658	0.0641917	0.0164155		-0.0475574	0.0959674	0.0255546	-0.0601022	-0.230234	-0.0737194	-0.0255294	-0.109707
27	-0.0388858	0.0139916	-0.00504001	-0.0673596	-0.00504001	-0.0673596	-0.083156	-0.0388858	-0.0263388	0.00946664	-0.0264796	-0.0388858	-0.149875	0.146815	-0.0192745	-0.0385051	0.0444119	-0.0156091	-0.015275	-0.118847	0.0348738	-0.118847	-0.118847		-0.233107	-0.367208	0.378769	-0.0054801	0.083306	0.0173061	-0.112099	0.0571985	0.180403	0.0457553	-0.0390374	0.0549075	-0.0239231	-0.105305	0.0599378	0.00747047		-0.0229498	-0.12428	-0.108191	-0.00683521	-0.0494793	-0.0691158	0.133373	-0.0394679
28	-0.0813031	0.0113425	0.0361042	0.0405956	0.0361042	0.0405956	0.0224005	-0.0813031	0.047958	0.0217077	-0.103574	-0.0813031	0.0284424	0.113518	0.0245512	0.0813157	0.00965468	-0.0207954	0.0635854	-0.16384	-0.349663	-0.16384	-0.16384		-0.231263	-0.403308	0.351913	-0.0335455	0.0262084	0.0176136	0.035348	-0.0203541	0.249801	0.024388	-0.0172245	0.065175	0.0115137	-0.0376945	0.0903498	0.0674599		-0.0598541	-0.0559821	-0.0430345	-0.0587361	-0.0277593	0.024802	0.0542222	-0.0894914
29	0.0551027	0.00718317	0.0335649	0.0280534	0.0335649	0.0280534	-0.160585	0.0551027	0.0483346	0.0252902	-0.00488285	0.0551027	0.0289329	-0.0299449	-0.0828022	0.0232143	-0.0123625	-0.0075107	0.0748329	-0.269168	0.10879	-0.269168	-0.269168		-0.145518	-0.416203	0.290572	-0.0400343	-0.0162443	0.210617	-0.0390462	-0.0223808	0.184537	0.0453515	-0.0336344	0.0434193	0.0343379	0.0100272	0.0724064	-0.0137092		-0.0239957	-0.0754407	-0.0590381	-0.105429	0.0626945	-0.105996	-0.0548968	-0.076235
30	0.121768	-0.0232441	0.0668052	0.105958	0.0668052	0.105958	-0.116971	0.121768	0.0334787	0.121706	0.061506	0.121768	-0.0320038	-0.0666697	0.0598204	-0.0612768	-0.00576889	0.059098	0.0689625	-0.0648043	-0.398885	-0.0648043	-0.0648043		-0.167339	-0.424053	0.226686	-0.00469743	0.0435412	0.0311828	0.0217693	-0.0144834	0.125102	0.0475403	-0.0477439	0.0753834	-0.0477357	-0.0204205	0.106227	0.0819688		-0.0585223	0.0168631	-0.155491	-0.0786847	-0.0566373	-0.114173	-0.0170891	-0.0296037
31	0.0875008	0.0281321	0.113236	-0.0860988	0.113236	-0.0860988	0.04637	0.0875008	0.0369013	0.151497	0.101696	0.0875008	0.0484139	0.0767037	0.124235	-0.107454	0.0375659	0.0363258	0.0429354	0.141284	0.0406927	0.141284	0.141284		-0.186784	-0.412045	0.216196	-0.0263269	0.00840547	-0.0785602	0.172745	-0.0708443	0.063083	0.0371522	-0.0358791	0.0587891	-0.00183637	-0.0254635	0.11198	-0.0243043		-0.0163116	-0.0861263	-0.0194543	-0.0490109	-0.0291364	-0.065113	-0.160094	-0.0313387
32	-0.00501664	0.0139475	-0.0531185	-0.0425232	-0.0531185	-0.0425232	-0.0544274	-0.00501664	0.0268032	-0.00115783	-0.106006	-0.00501664	-0.0174366	-0.00675939	-0.0092658	-0.00926051	-0.0202979	-0.0201009	0.0555352	0.351422	-0.18138	0.351422	0.351422		-0.232529	-0.449842	0.150763	0.00140535	0.0307932	0.145025	0.18197	0.00305156	-0.040319	0.119414	-0.0739386	0.0398776	-0.0213664	-0.0692823	0.0616368	0.0258204		-0.0792645	-0.0658228	-0.0300306	0.00174989	-0.0181849	0.00367303	-0.0811109	-0.00837245
33	0.106973	-0.00465996	-0.0718849	0.0850565	-0.0718849	0.0850565	-0.0376284	0.106973	0.0232262	0.0482657	0.0448166	0.106973	-0.0536575	0.0364534	0.0401497	0.134729	0.0112109	0.0413841	-0.0192045	0.301517	-0.238435	0.301517	0.301517		-0.248156	-0.471397	0.102652	-0.0146554	0.0339512	0.0198273	0.0565209	0.018648	0.14606	0.0690246	-0.0316451	0.0254684	-0.0131709	-0.0808127	0.0994216	0.0134373		-0.0471299	-0.110516	-0.0426912	-0.0131863	-0.0747765	-0.168437	-0.0624418	-0.022487
34	0.0158575	-0.118271	-0.0176031	-0.108968	-0.0176031	-0.108968	0.0873555	0.0158575	0.0210697	-0.0912815	-0.0400847	0.0158575	0.0484964	0.0292227	-0.0842885	-0.150967	0.00669912	-0.0184556	0.0835346	-0.0777333	-0.113339	-0.0777333	-0.0777333		-0.268026	-0.424472	0.11608	0.0228074	0.04233	0.0466379	0.0475647	-0.037801	-0.0375741	0.162617	-0.00507718	0.0748685	-0.0140591	-0.0208663	0.0930004	0.0127375		-0.0800882	-0.0668492	-0.11277	-0.111012	-0.220385	-0.102052	-0.0433031	-0.0317661
35	-0.0663733	-0.0186251	-0.0248529	-0.0987383	-0.0248529	-0.0987383	0.0809532	-0.0663733	0.0586379	-0.00935736	0.00499207	-0.0663733	0.0646634	0.0304224	-0.0167794	0.102377	-0.0432293	0.0669402	0.0256901	0.109133	-0.197643	0.109133	0.109133		-0.267229	-0.43471	0.0831042	-0.0143751	0.0234707	0.125778	0.104851	0.0727179	0.0299343	0.141507	-0.045892	0.0402643	-0.0359141	-0.0579733	0.0520415	-0.0114256		-0.0593473	0.00539323	-0.108124	0.0226143	-0.0899489	-0.118404	0.011597	-0.0527039
36	-0.0769608	-0.0168304	-0.0471781	0.0750727	-0.0471781	0.0750727	0.0317585	-0.0769608	-0.0105245	-0.0963642	-0.0400044	-0.0769608	-0.00413445	-0.0578639	0.0405618	-0.0770712	0.0742101	0.024117	0.0676417	0.316773	0.132884	0.316773	0.316773		-0.297025	-0.4618	0.0403945	0.0470968	0.049387	0.0844761	-0.163133	0.092632	0.0804404	0.177236	-0.0312252	0.0578416	-0.0162474	0.0209939	0.0857334	0.0218204		-0.157254	-0.160623	-0.0685622	-0.142273	-0.136048	-0.179787	-0.149992	-0.0259385
37	-0.0230195	0.0406972	-0.00223909	0.0722199	-0.00223909	0.0722199	-0.00337242	-0.0230195	-0.0914451	-0.0344151	0.0475942	-0.0230195	0.111115	-0.00184644	0.0844813	0.0317791	-0.0296928	0.0732651	0.13955	0.110426	-0.348302	0.110426	0.110426		-0.312355	-0.447996	-0.0427201	0.0445796	0.00919635	-0.0441861	0.0149799	-0.00190493	0.0673779	0.326813	-0.0683982	0.036613	-0.0292447	-0.0761152	0.106098	0.0442166		-0.063435	-0.0935921	-0.0506134	-0.124558	-0.198544	-0.121292	0.00345589	-0.101364
38	0.0117489	0.00856227	0.0551847	0.166894	0.0551847	0.166894	0.165386	0.0117489	0.0420185	0.0758065	-0.0337375	0.0117489	-0.0263978	-0.0264275	0.0792098	0.0966671	-0.0127902	-0.146928	0.187579	0.140939	-0.149726	0.140939	0.140939		-0.368799	-0.440468	-0.0578162	0.0588793	0.08241	0.147547	-0.0341553	-0.0388033	0.0122378	0.411117	-0.0492227	0.0621164	0.0189824	-0.0168695	0.118812	0.105146		-0.110448	-0.0737111	-0.0550557	0.01614	-0.00561186	-0.0928745	-0.0559625	-0.0506381
39	0.0400383	-0.0148825	0.055917	-0.0474896	0.055917	-0.0474896	0.0492689	0.0400383	-0.0275196	0.00455856	0.139553	0.0400383	0.00405217	0.100354	0.0777577	0.0412298	0.0581445	0.0164001	0.172895	0.337545	0.0819745	0.337545	0.337545		-0.389112	-0.445094	-0.134257	0.0204012	0.0530759	0.223223	0.146681	-0.0659759	-0.144238	0.524175	-0.103144	0.0273324	-0.0141694	0.0102502	0.161999	0.0114		-0.0728316	-0.0690824	-0.0392361	-0.0280472	-0.00552043	-0.114545	-0.064145	-0.152732
40	0.133959	0.0929499	0.0953068	-0.0150795	0.0953068	-0.0150795	0.0347143	0.133959	0.0567718	0.157563	0.186617	0.133959	0.0253346	-0.0264275	0.075578	0.0182058	0.0688026	-0.0557138	0.158545	-0.00127997	-0.0239761	-0.00127997	-0.00127997		-0.378163	-0.438426	-0.173867	0.0570866	0.0670295	0.128299	-0.097963	-0.0223808	-0.157462	0.761164	-0.0556482	0.0354774	0.00978276	0.0482186	0.0462936	0.0476851		-0.000465186	-0.159999	-0.0774222	-0.0991023	-0.0975658	-0.120663	-0.134987	-0.0634468
41	0.0937796	-0.0324161	-0.147996	0.0321854	-0.147996	0.0321854	0.141089	0.0937796	0.0294226	0.0329077	0.193977	0.0937796	0.0426842	0.235379	0.213404	0.035963	0.0983472	0.1283	0.236498	0.264195	-0.316104	0.264195	0.264195		-0.370286	-0.437685	-0.218601	0.046843	-0.0297776	0.308677	0.0619689	-0.0514699	-0.175675	0.76478	-0.0903939	0.00507019	-0.0014381	0.0496565	0.0592254	0.0849669		-0.134802	-0.142834	-0.0483698	-0.0752352	-0.0934663	-0.114689	0.0334631	0.0259387
42	0.112317	-0.000894088	0.0106382	-0.0467526	0.0106382	-0.0467526	-0.0930049	0.112317	0.0795177	0.0599894	0.134363	0.112317	0.170947	-0.0255869	0.109773	0.0102133	0.0703	0.157841	0.316234	0.479419	0.112704	0.479419	0.479419		-0.416526	-0.419992	-0.261588	0.0805352	-0.00433696	0.146583	0.0682011	-0.0311923	-0.143721	1.07865	-0.0794233	0.0254721	-0.00499893	0.0461995	0.088462	0.00962149		-0.121888	-0.0178492	-0.0473624	-0.0347458	-0.163885	-0.21398	0.0641517	-0.089432
43	0.306203	0.297277	0.219472	0.252865	0.219472	0.252865	0.0412233	0.306203	0.187702	1.36235	1.36482	0.306203	0.352213	-0.0319852	1.66725	0.117218	0.274897	0.263034	0.500473	0.304102	-0.0155456	0.304102	0.304102		-0.430791	-0.442533	-0.253443	0.0846178	0.0308983	0.249398	0.184962	0.0207628	-0.153344	2.46613	-0.0580575	0.0261509	-0.0150469	0.0191356	0.104578	0.0620193		-0.0168027	-0.0481543	-0.104047	-0.0744906	0.0132309	-0.135473	0.00511771	-0.0368747
44	1.641	2.26154	1.68761	2.2684	1.68761	2.2684	1.57083	1.641	0.844067	5.01016	3.96042	1.641	6.37983	1.86546	6.19763	2.20183	3.2694	4.12387	1.05374	0.367541	0.138213	0.367541	0.367541		-0.420436	-0.429539	-0.210895	0.0394023	0.0916793	0.0828978	0.0858452	0.0761984	-0.156945	3.08021	-0.0636795	0.0200608	-0.00931075	0.00256698	0.0135104	0.0425865		-0.0657802	-0.0503476	-0.0905854	-0.0696528	-0.0934663	-0.110257	-0.0916388	-0.0541863
45	4.21192	3.58195	3.38751	4.43639	3.38751	4.43639	3.9045	4.21192	1.24025	5.85219	4.29919	4.21192	8.66308	6.25777	7.11148	6.80836	3.6009	6.24991	1.20816	1.53218	0.213272	1.53218	1.53218		-0.230534	-0.336251	2.44236	0.49059	0.164633	0.217238	0.0559844	7.32086	1.23251	3.11048	-0.0420131	0.0131806	-0.000560543	0.00955589	0.0502141	0.0495194		-0.131854	-0.0585579	-0.0685398	-0.0788079	-0.0693017	-0.205203	0.0771954	-0.0621781
46	4.42958	3.51562	3.44022	4.1384	3.44022	4.1384	4.36728	4.42958	1.31009	6.02095	4.23566	4.42958	8.74641	8.36972	6.7004	8.68961	3.55597	6.19576	1.25837	3.58384	0.237149	3.58384	3.58384		0.200663	0.725626	5.78877	3.23167	0.380115	1.90874	4.67201	9.20276	6.29168	3.57057	-0.0767496	0.0528909	0.0101675	0.0132677	0.0919142	0.0420919		0.00628473	-0.154848	0.00140225	-0.0273778	-0.0621737	-0.0454713	0.217044	-0.0320986
47	4.35861	3.53007	3.37824	4.49787	3.37824	4.49787	4.47891	4.35861	1.27236	5.6713	4.1709	4.35861	8.34603	8.46969	6.84126	8.92646	3.55002	6.20652	1.29736	3.39413	0.194344	3.39413	3.39413		0.102177	1.06285	5.7223	7.08591	0.800488	6.90789	7.87012	9.34825	7.88314	3.83536	-0.0703331	0.00856132	0.0195855	0.0141849	-0.0258337	0.0337446		-0.0392548	0.0243496	-0.095095	-0.0340764	0.0266902	0.0635691	0.295047	0.129846
48	4.24889	3.49839	3.35474	4.59324	3.35474	4.59324	4.345	4.24889	1.32255	5.2277	4.10165	4.24889	7.92199	8.18313	6.78692	8.72659	3.4087	6.29723	1.22493	2.27094	0.765546	2.27094	2.27094		0.00906182	1.13727	5.47387	7.63979	1.19506	7.52218	8.38576	9.10621	8.66521	4.14585	-0.0734267	0.0507732	0.0665475	0.061069	-0.0247878	0.163281		-0.0924161	-0.03445	-0.0362588	-0.0387156	-0.0903463	0.0472744	0.247137	-0.0650054
49	4.24031	3.43529	3.46899	4.45277	3.46899	4.45277	4.73752	4.24031	1.33738	5.37909	4.03267	4.24031	7.87913	8.63542	6.6148	8.33306	3.39835	5.72533	1.17674	2.6302	1.69583	2.6302	2.6302		-0.0783552	1.07631	5.03931	7.82259	1.60774	7.19769	7.80685	9.13447	8.41665	4.11066	-0.0139846	0.0930975	0.185845	0.0544336	-0.0608345	0.273574		0.00834414	-0.0435656	-0.0513695	-0.0200578	-0.0440941	0.0918447	0.406083	0.0891406
50	4.23516	3.44187	3.42669	4.33001	3.42669	4.33001	4.64564	4.23516	1.3677	4.76426	3.9005	4.23516	7.68522	7.86902	6.47887	7.59434	3.31633	5.97924	1.13409	2.69183	2.00476	2.69183	2.69183		-0.116503	0.978742	5.01333	7.65745	2.07473	6.79438	7.7645	8.6279	8.35035	4.42484	0.0214998	0.0872892	0.364655	0.177505	0.0267141	0.573076		-0.0518204	0.0793859	0.0463416	0.117934	0.0386512	-0.0424121	0.526496	0.158932
51	4.18106	3.46486	3.43494	4.3157	3.43494	4.3157	4.65806	4.18106	1.39435	4.42078	3.81274	4.18106	7.51669	7.5755	6.18298	7.50293	3.26506	5.95425	1.16246	1.83067	2.4538	1.83067	1.83067		-0.166492	0.995034	4.76263	7.40255	2.57248	7.38942	7.94152	8.66415	7.8206	4.38441	0.088609	0.182463	0.503765	0.547629	0.153127	0.833064		-0.0364821	-0.0818402	0.0217091	0.0950852	0.070679	0.00882039	0.584934	0.115263
52	4.22805	3.41219	3.44828	4.48528	3.44828	4.48528	4.81024	4.22805	1.50599	4.29861	3.65066	4.22805	7.23401	7.26993	6.07834	7.60354	3.19453	5.97702	1.13016	3.72442	3.45849	3.72442	3.72442		0.252604	0.879474	4.48556	7.32476	2.92702	7.05578	7.75389	8.28425	8.3452	4.40544	0.251868	0.252437	0.604672	0.876443	0.465865	1.07702		-0.058317	0.054052	0.0367951	0.0823317	0.0195025	0.0195129	0.697718	0.290113
53	4.14592	3.38288	3.42043	4.26136	3.42043	4.26136	4.5895	4.14592	1.47209	3.99266	3.70671	4.14592	6.77526	7.15725	6.24705	7.1741	3.14307	5.8142	1.07873	2.72346	2.74626	2.72346	2.72346		0.139121	0.867416	4.26645	7.16518	3.41292	7.40582	7.65261	7.96098	8.22237	4.41687	0.349177	0.406935	0.723113	1.15998	0.661344	1.24167		-0.0518516	0.01952	0.109438	0.037922	0.231337	0.0302053	0.701297	0.165638
54	4.21045	3.3725	3.37497	4.25585	3.37497	4.25585	4.78283	4.21045	1.51933	4.02996	3.57656	4.21045	6.87271	7.08881	5.77449	6.9632	3.10197	5.71356	1.08644	3.05892	2.43335	3.05892	3.05892		0.0593038	0.841627	4.19458	6.98056	3.66443	7.26203	8.23967	7.95905	8.12275	4.51361	0.534203	0.562647	0.765817	1.2377	0.805601	1.25636		-0.0594422	-0.0543722	0.10708	0.0690594	0.0366024	0.02729	0.7111	0.255237
55	4.15407	3.37657	3.37934	4.41844	3.37934	4.41844	4.78923	4.15407	1.56547	4.11299	3.58999	4.15407	6.58115	6.64125	5.49783	6.38939	3.01011	5.7233	1.02473	2.11114	3.01342	2.11114	2.11114		-0.0250105	0.688074	3.86213	6.83907	3.94359	6.97789	8.24293	7.98282	8.2593	4.39701	0.620114	0.706558	0.767422	1.42259	1.00978	1.30288		0.0583988	-0.0160783	0.0240447	0.0673219	0.123875	0.0449577	0.667411	0.31918
56	4.23055	3.32364	3.41942	4.32318	3.41942	4.32318	4.68537	4.23055	1.64488	3.93804	3.39188	4.23055	6.15862	6.34374	5.5504	6.60214	2.95257	5.47685	0.989384	2.59339	3.21129	2.59339	2.59339		0.0471203	0.666569	4.02736	6.64558	4.31388	5.9628	7.65587	8.03257	8.70883	4.45175	0.735338	0.858888	0.795284	1.46571	1.09277	1.32986		-0.0204473	0.0677551	0.133638	0.0659832	0.199249	-0.000901001	0.633525	0.201996
57	4.04281	3.42502	3.36982	4.36503	3.36982	4.36503	4.63191	4.04281	1.58445	3.65617	3.40828	4.04281	6.70377	6.69262	5.58823	6.38261	2.97496	5.57535	1.00132	1.91204	3.05562	1.91204	1.91204		0.501409	0.674961	3.95887	6.55842	4.64134	6.19395	7.40444	7.77245	8.65696	4.41755	0.802082	0.896925	0.779149	1.48666	1.18548	1.40728		-0.0182437	-0.0389975	-0.000933338	-0.0136571	0.192793	0.107655	0.858622	0.132907
58	4.08096	3.31272	3.39513	4.20229	3.39513	4.20229	4.96083	4.08096	1.48457	3.95017	3.42765	4.08096	5.94621	6.11662	5.1696	6.53992	2.9219	5.55896	1.06463	1.70052	3.49999	1.70052	1.70052		0.799182	0.612849	3.94389	6.59208	4.6898	5.97258	7.46527	7.79585	8.59667	4.39717	0.837155	0.929084	0.801007	1.52888	1.17579	1.41438		0.0275804	-0.0321962	0.088169	0.0797776	0.15474	0.0958475	0.685825	0.3547
59	4.06182	3.23995	3.32203	4.18138	3.32203	4.18138	4.65866	4.06182	1.62328	3.42765	3.34716	4.06182	6.07808	6.07053	5.28154	6.23684	2.94592	5.71071	1.00159	2.98005	3.49091	2.98005	2.98005		0.787565	0.580956	3.68712	6.40184	4.69512	6.08138	7.76314	7.31003	8.26773	4.51065	0.930523	1.02558	0.774605	1.53609	1.19073	1.40539		-0.00992546	-0.123918	0.142816	0.104612	0.289121	0.0413548	0.664044	0.357448
60	3.98597	3.29786	3.41389	4.14607	3.41389	4.14607	4.53254	3.98597	1.53067	3.47857	3.27396	3.98597	6.21305	6.67806	5.33181	6.35381	2.94827	5.57136	1.0024	2.05951	3.31223	2.05951	2.05951		0.807884	0.587873	3.84075	6.4787	4.87568	5.20788	7.85111	7.49819	8.83216	4.43481	1.02178	1.038	0.768339	1.4998	1.15782	1.43358		-0.0366718	-0.0313307	0.176334	-0.025541	0.255382	0.115117	0.760034	0.251065
61	3.95193	3.27354	3.41366	4.08395	3.41366	4.08395	4.59721	3.95193	1.63973	3.35507	3.41013	3.95193	5.7661	5.98975	5.26061	6.38102	2.85972	5.16886	0.943121	2.22449	3.62378	2.22449	2.22449		0.895301	0.533193	3.75545	6.20883	5.03617	5.66196	7.33601	7.43742	8.50993	4.51124	1.10258	1.06365	0.772775	1.54369	1.19223	1.42922		0.0137155	-0.0685596	0.0860399	0.0320434	0.174807	0.0626826	0.779343	0.274302
62	3.95581	3.29293	3.44488	3.99454	3.44488	3.99454	4.82053	3.95581	1.55712	3.53464	3.35258	3.95581	5.68273	5.73425	4.95723	5.85111	2.83906	5.36148	0.930378	1.86963	3.65005	1.86963	1.86963		0.878485	0.547811	3.90591	6.23172	5.09769	4.94142	7.33656	7.1326	8.60663	4.50501	1.14539	1.06851	0.781251	1.61913	1.14854	1.43087		-0.0450705	-0.0222151	0.0919248	0.0420168	0.195211	0.0899575	0.889311	0.440536
63	3.94078	3.28866	3.47312	3.87385	3.47312	3.87385	4.53188	3.94078	1.52364	3.51345	3.23434	3.94078	5.34116	6.39716	5.10071	6.15152	2.86662	5.29702	0.942882	1.58743	3.57874	1.58743	1.58743		0.828145	0.521577	3.85827	6.11414	4.94873	5.21922	7.61326	6.89891	8.91959	4.58459	1.21396	1.10131	0.741545	1.59726	1.15063	1.43688		-0.0225535	-0.0914787	0.140185	0.071516	0.18429	0.11546	0.91024	0.208255
64	4.06606	3.30685	3.4844	3.82142	3.4844	3.82142	4.52985	4.06606	1.5576	3.06841	3.21597	4.06606	5.73331	5.90174	5.11507	5.99498	2.84739	5.1576	0.924507	2.59219	4.07614	2.59219	2.59219		0.961953	0.531669	3.68696	6.06795	4.87536	4.47469	7.58773	7.03319	8.20056	4.49631	1.20692	1.10906	0.768224	1.62643	1.17972	1.4838		-0.0153917	-0.0790635	0.172374	0.00643874	0.147155	0.1114	0.86135	0.289119
65	3.86626	3.20327	3.43755	3.71602	3.43755	3.71602	4.49915	3.86626	1.58325	3.14093	3.32691	3.86626	5.63354	6.14287	5.05177	5.93078	2.81755	5.19916	0.958601	1.26688	4.14347	1.26688	1.26688		1.00639	0.480927	3.85375	5.97869	4.85361	4.42519	7.23365	6.96941	8.34606	4.5606	1.22229	1.15065	0.744032	1.66652	1.13428	1.42076		0.103416	-0.108946	0.208157	-0.00140169	0.0729425	0.134158	1.07187	0.237418
66	3.96265	3.28897	3.45671	3.77327	3.45671	3.77327	4.62419	3.96265	1.5075	3.50819	3.26153	3.96265	5.75595	5.88858	5.1141	5.95457	2.85707	5.31802	0.93531	2.83706	4.02382	2.83706	2.83706		0.982023	0.551404	3.84699	6.17954	5.00983	4.67368	6.94501	7.06441	8.4426	4.69177	1.22767	1.16352	0.782535	1.61211	1.22552	1.47763		-0.0534835	-0.0423589	0.172647	-0.0332564	0.0624799	0.230191	0.790126	0.280834
67	4.00714	3.21432	3.42714	3.85285	3.42714	3.85285	4.57713	4.00714	1.47748	3.47015	3.35367	4.00714	5.39624	5.68909	5.01918	6.01604	2.82233	5.23104	0.920053	1.73172	3.65271	1.73172	1.73172		1.03073	0.488996	3.73817	6.09173	4.95016	4.30473	6.91052	7.20622	8.53912	4.64542	1.15581	1.17267	0.740202	1.64184	1.15373	1.48379		0.00834414	-0.0920029	0.0710212	0.00857175	0.115493	0.154971	0.872647	0.340995
68	3.79589	3.21292	3.37055	3.72035	3.37055	3.72035	4.56482	3.79589	1.58121	3.38296	3.1921	3.79589	5.49774	5.91714	4.84198	5.9618	2.82461	5.24711	0.910779	2.38972	3.81572	2.38972	2.38972		1.03262	0.445614	3.91854	5.95034	4.98555	4.12939	6.72643	7.12397	8.91512	4.64302	1.23228	1.18335	0.794017	1.59863	1.20411	1.43386		-0.137606	-0.0835917	0.15534	-0.0441491	0.100505	0.211322	0.979291	0.270462
69	3.85501	3.23871	3.39455	3.93026	3.39455	3.93026	4.46162	3.85501	1.48467	3.07026	3.37424	3.85501	5.43611	5.78183	4.93892	5.82758	2.79614	5.23016	0.873902	2.75647	3.79081	2.75647	2.75647		1.01369	0.491826	3.80694	6.03982	4.89132	4.14958	6.96075	7.0187	8.55423	4.58441	1.24211	1.14957	0.731917	1.69617	1.17828	1.45713		-0.0134908	-0.114601	0.196755	0.0375248	0.174685	0.183361	0.830447	0.122846
70	3.94939	3.15791	3.41575	3.69065	3.41575	3.69065	4.48706	3.94939	1.5183	3.25196	3.18908	3.94939	5.32233	5.77237	4.8722	5.44426	2.84636	5.29968	0.926353	1.71801	3.95148	1.71801	1.71801		0.976325	0.493822	3.80043	5.89544	4.97133	4.14515	7.4916	6.69818	8.39328	4.59402	1.21411	1.16308	0.709443	1.58479	1.16199	1.37955		-0.0217622	-0.0632264	0.125579	0.0444717	0.29634	0.166751	0.813995	0.272762
71	3.95227	3.21879	3.35903	3.94251	3.35903	3.94251	4.47168	3.95227	1.46141	3.21951	3.22222	3.95227	5.19022	5.63846	4.83819	6.21293	2.81858	5.13584	0.873313	2.30413	3.95344	2.30413	2.30413		0.937626	0.46151	3.71254	5.89995	4.96011	4.40658	7.46527	7.07496	8.10523	4.6588	1.15638	1.18685	0.744449	1.57936	1.23028	1.41058		-0.0503314	-0.00859188	0.0636263	-0.0230348	0.292823	0.113145	0.905593	0.237028
72	3.89843	3.13225	3.37366	3.64658	3.37366	3.64658	4.52279	3.89843	1.43194	3.10848	3.16329	3.89843	5.23323	5.21288	4.67507	5.44705	2.76385	5.09416	0.849641	2.82172	3.75051	2.82172	2.82172		0.981878	0.441652	3.71016	5.91638	4.83818	4.22556	6.99959	6.57719	8.22496	4.73927	1.13757	1.18444	0.708383	1.65047	1.09839	1.37323		-0.0258186	-0.204532	0.230113	0.0789832	0.283555	0.159918	0.969914	0.216792
73	3.8829	3.13974	3.34139	3.70181	3.34139	3.70181	4.65007	3.8829	1.48511	3.02252	3.18614	3.8829	5.19235	5.91065	4.73684	5.95679	2.7958	5.30651	0.855098	3.1914	3.24865	3.1914	3.1914		0.984295	0.398243	3.7626	5.96042	4.84555	4.19845	7.25049	6.81813	8.23544	4.57902	1.12357	1.15593	0.701885	1.58973	1.14774	1.36604		0.0356608	-0.150782	0.154196	0.0193395	0.285635	0.25129	0.934834	0.195602
74	4.03957	3.1573	3.33815	4.02563	3.33815	4.02563	4.60542	4.03957	1.46736	2.99821	3.16978	4.03957	5.14807	5.8321	4.8368	5.66748	2.82121	4.92722	0.868524	1.17914	3.40502	1.17914	1.17914		0.939987	0.516559	3.60734	5.88067	4.97502	4.73423	7.22414	6.73406	7.88537	4.47375	1.08092	1.19108	0.678587	1.46186	1.07053	1.36898		-0.0193857	-0.176903	0.228235	0.0033368	0.0908074	0.139504	0.963564	0.180337
75	4.05848	3.1421	3.41151	3.72266	3.41151	3.72266	4.61538	4.05848	1.50081	2.92742	3.18063	4.05848	4.95526	5.63642	4.79348	5.88035	2.84814	5.23073	0.926385	2.18191	3.65886	2.18191	2.18191		0.966457	0.461756	3.77007	5.88271	4.87273	4.73738	7.24533	6.85219	7.82301	4.54261	1.12422	1.17778	0.688252	1.4908	1.1473	1.3419		-0.0102269	-0.142733	0.115871	-0.0141039	0.169393	0.0453576	1.0006	0.166516
76	4.01165	3.18352	3.46634	3.8285	3.46634	3.8285	4.38993	4.01165	1.57617	3.02015	3.10773	4.01165	5.44806	5.84582	4.51281	5.72609	2.81726	5.19315	0.872868	1.61208	3.32551	1.61208	1.61208		0.962144	0.435944	3.84898	5.82188	4.76838	5.1057	7.64718	6.51524	8.36787	4.81641	1.09094	1.18339	0.715954	1.51052	1.06287	1.36683		-0.0604712	-0.143136	0.175647	-0.0804959	0.24547	0.165979	0.884155	0.240576
77	4.1208	3.16984	3.40654	3.76835	3.40654	3.76835	4.49603	4.1208	1.49655	3.11224	3.18415	4.1208	5.16411	5.40383	4.85875	5.614	2.86993	5.12117	0.802009	2.2294	4.09251	2.2294	2.2294		0.993597	0.442217	3.61402	5.91662	4.81995	4.98145	7.45739	6.43841	8.10111	4.73903	1.10918	1.17438	0.64853	1.59011	1.10734	1.33938		-0.120937	-0.211333	0.173015	-0.040104	0.216073	0.140219	0.777168	0.251104
78	4.01867	3.07816	3.2846	3.7415	3.2846	3.7415	4.39092	4.01867	1.47871	2.95074	3.06377	4.01867	4.78603	5.23365	4.48054	5.47408	2.80073	5.18815	0.838027	1.69129	4.01898	1.69129	1.69129		0.977643	0.44923	3.77774	5.87048	4.71287	4.85785	7.51224	6.63135	8.03428	4.63451	1.02607	1.18628	0.639928	1.59955	1.09606	1.24866		-0.0487307	-0.213687	0.135422	0.0165371	0.170707	0.112115	0.735012	0.177062
79	3.99726	3.10982	3.39219	3.74086	3.39219	3.74086	4.3073	3.99726	1.45665	3.1493	3.11462	3.99726	5.05491	5.03556	4.70201	5.7807	2.79738	5.50659	0.71817	1.38738	4.09741	1.38738	1.38738		0.963471	0.425951	3.58025	5.78886	4.7579	5.05083	7.03597	6.81373	7.73695	4.80736	1.02369	1.19257	0.66514	1.48508	1.07673	1.31491		-0.0518204	-0.237916	0.243711	-0.112599	0.137119	0.136159	0.779343	0.228275
80	3.99495	3.16583	3.3561	3.80701	3.3561	3.80701	4.09023	3.99495	1.48149	3.04358	3.18669	3.99495	5.06433	5.57113	4.58237	5.8572	2.82959	5.03078	0.867889	1.98573	3.33785	1.98573	1.98573		0.969689	0.463034	3.87476	5.97228	4.54758	5.57714	7.65533	6.37425	8.36031	4.69824	1.01075	1.18119	0.728437	1.44915	1.06561	1.33373		-0.129889	-0.171208	0.245084	-0.0789329	0.224455	0.0560226	0.875459	0.139418
81	4.06546	3.02836	3.32718	3.78758	3.32718	3.78758	4.23239	4.06546	1.48191	2.85883	3.13936	4.06546	5.19272	5.77395	4.3981	5.67452	2.7825	5.1514	0.806003	1.88954	3.8192	1.88954	1.88954		1.02435	0.490916	3.75851	5.89925	4.31467	5.23814	7.10168	6.51286	7.41316	4.75229	0.967669	1.16657	0.63265	1.4574	1.04703	1.34803		-0.0782341	-0.226466	0.157882	-0.0976147	0.147123	0.164092	0.817277	0.170687
82	4.20848	3.16218	3.36183	3.93105	3.36183	3.93105	4.35206	4.20848	1.42677	3.04774	3.12083	4.20848	5.09899	5.34781	4.70431	5.92875	2.8202	5.26881	0.844009	1.7855	3.69372	1.7855	1.7855		1.01833	0.423859	3.86443	5.91962	4.42886	4.87677	7.23256	6.3469	8.15763	4.78402	0.892034	1.16208	0.658602	1.43505	1.01158	1.26565		-0.0601386	-0.090997	0.0938252	-0.114882	0.218489	0.0947325	0.691535	0.111423
83	3.97468	3.1509	3.34205	3.77652	3.34205	3.77652	4.52307	3.97468	1.43743	2.88112	3.09911	3.97468	5.17115	5.99708	4.92003	5.45111	2.77328	5.13901	0.875986	2.09735	3.78896	2.09735	2.09735		0.995989	0.470985	3.84067	5.82829	4.61105	4.78594	7.40986	6.4967	7.89362	4.90486	0.950099	1.17355	0.616517	1.54398	0.991763	1.35323		-0.0811342	-0.219926	0.247397	-0.0105072	0.216043	0.27562	0.812119	0.140587
84	4.0531	3.11472	3.38403	3.71381	3.38403	3.71381	4.46944	4.0531	1.44147	2.90721	3.23402	4.0531	5.02082	5.68288	4.6663	5.7691	2.84601	5.15501	0.866409	1.63122	4.0112	1.63122	1.63122		1.0133	0.474551	3.82145	5.96271	4.31593	5.07006	6.6971	6.45961	7.9271	4.82182	0.867466	1.15415	0.616038	1.44528	0.992142	1.34804		-0.0523752	-0.141546	0.30106	-0.0611687	0.0299333	0.138476	0.663233	0.19837
85	3.95584	3.16023	3.45454	3.71002	3.45454	3.71002	4.349	3.95584	1.43645	3.36489	3.1655	3.95584	4.90684	5.44658	4.56519	5.65232	2.77626	5.09156	0.753059	2.59891	4.11655	2.59891	2.59891		1.08848	0.510947	3.7988	5.93789	4.3921	5.45637	7.51686	6.25787	7.80893	4.80014	0.878444	1.17159	0.634647	1.56971	1.0229	1.30954		-0.0467336	-0.210568	0.157768	-0.0396332	0.277039	0.085612	0.801846	0.11737
86	4.03483	3.05643	3.38921	3.72301	3.38921	3.72301	4.14686	4.03483	1.42254	3.41379	3.1522	4.03483	4.77404	5.59728	4.42193	5.93554	2.79559	5.00092	0.844789	1.04985	3.82584	1.04985	1.04985		1.0833	0.427821	3.7696	5.93655	4.23571	5.26968	7.2904	6.39959	8.16397	4.64201	0.828759	1.16004	0.606222	1.47004	1.00885	1.29712		-0.122347	-0.189278	0.252867	-0.0501767	0.284779	0.126696	0.748567	0.118247
87	3.9878	3.08453	3.35181	3.52771	3.35181	3.52771	4.11562	3.9878	1.33207	2.91119	3.18022	3.9878	4.73123	5.45029	4.53371	5.71639	2.78707	4.9727	0.798	1.82722	3.69041	1.82722	1.82722		1.05474	0.452946	4.0017	5.84841	4.26015	5.36932	7.29067	6.62392	7.74657	4.78821	0.834436	1.16091	0.606451	1.47281	0.977056	1.19217		-0.0941585	-0.239988	0.23311	-0.154057	0.107478	0.354128	0.83454	0.122281
88	4.01422	3.10612	3.37851	3.74957	3.37851	3.74957	4.52908	4.01422	1.41479	2.90086	3.15986	4.01422	5.0762	5.60377	4.55269	5.34417	2.84412	5.15026	0.77471	2.20957	3.54633	2.20957	2.20957		1.06681	0.467146	3.83098	5.92401	4.31799	5.80483	6.93578	6.32744	7.57721	4.90112	0.910681	1.15322	0.628984	1.42825	0.976543	1.24655		-0.0682515	-0.19439	0.27535	-0.0984569	0.09041	0.261496	0.635058	0.0757858
89	3.9348	3.08782	3.35731	3.56307	3.35731	3.56307	4.24175	3.9348	1.43813	3.18111	3.26567	3.9348	5.18383	5.46012	4.43305	5.97474	2.80641	5.03495	0.836229	1.95789	3.2344	1.95789	1.95789		1.11385	0.494486	3.77266	6.00208	4.20295	5.40056	7.771	6.39656	7.67598	4.76861	0.875233	1.13913	0.624051	1.46052	1.00845	1.24696		-0.0872344	-0.175393	0.326518	-0.0729276	0.246112	0.147567	0.771713	0.082219
90	4.14388	3.1532	3.31205	3.82506	3.31205	3.82506	4.19912	4.14388	1.35834	3.00173	3.12251	4.14388	4.97634	5.68659	4.43236	5.99174	2.793	5.11206	0.798081	1.16086	3.75704	1.16086	1.16086		1.19648	0.478931	3.92653	5.9976	3.99453	5.60963	7.59559	6.38132	7.51606	4.73826	0.857654	1.13447	0.593566	1.38214	0.975891	1.22926		-0.0857454	-0.165914	0.271092	-0.0904693	0.346662	0.104996	0.801421	0.125733
91	3.95942	3.1495	3.40293	3.76442	3.40293	3.76442	4.27699	3.95942	1.35969	3.25663	3.22996	3.95942	5.04366	5.70634	4.40324	5.65149	2.84101	5.14913	0.816917	1.8255	3.55606	1.8255	1.8255		1.18364	0.464512	3.81068	5.96987	4.22818	5.74112	7.33411	6.50735	7.54303	4.84537	0.893951	1.12915	0.588913	1.42533	0.969254	1.26464		-0.0946496	-0.23532	0.173495	-0.0897743	0.194508	0.170352	0.680326	0.134661
92	4.04615	3.12455	3.3956	3.76191	3.3956	3.76191	4.43031	4.04615	1.38105	3.16616	3.26662	4.04615	5.09658	5.60906	4.52033	5.51156	2.81648	4.95506	0.859695	2.4972	3.96459	2.4972	2.4972		1.20037	0.475069	3.75943	6.0251	4.1301	5.60805	7.48888	6.18931	7.42346	4.63245	0.837421	1.12927	0.593878	1.36497	0.929575	1.24374		-0.144752	-0.180987	0.187644	-0.0848372	0.078602	0.186535	0.670479	0.133004
93	4.02207	3.1133	3.35254	3.79417	3.35254	3.79417	4.2	4.02207	1.44666	3.29526	3.2443	4.02207	4.72235	5.45372	4.4136	5.58064	2.83385	5.0228	0.787883	1.51115	3.9381	1.51115	1.51115		1.21744	0.471894	3.84326	5.91383	4.04356	6.09368	7.19644	6.54663	7.20928	4.66878	0.847496	1.12544	0.618331	1.41172	1.02542	1.25028		-0.081815	-0.136998	0.182905	-0.13979	0.103746	0.0971634	0.744559	0.125674
94	4.1709	3.09001	3.4186	3.69743	3.4186	3.69743	4.27874	4.1709	1.45008	3.13117	3.21652	4.1709	4.91769	6.03668	4.40833	5.65467	2.84885	5.1602	0.954305	2.40092	3.62851	2.40092	2.40092		1.16175	0.382914	3.80229	5.7653	4.03234	5.92308	7.28931	6.32726	7.38121	4.78962	0.851822	1.13192	0.617892	1.36108	0.892676	1.28165		-0.05876	-0.239505	0.287093	-0.0312724	0.145289	0.303695	0.747842	0.10384
95	3.99756	3.13149	3.37285	3.8827	3.37285	3.8827	4.37494	3.99756	1.42275	3.39543	3.25928	3.99756	4.84009	5.46253	4.28389	5.16218	2.91383	5.20289	0.71615	2.04917	3.76606	2.04917	2.04917		1.19943	0.418865	3.78755	6.05558	4.05521	6.01989	8.29263	6.35985	7.77663	4.62067	0.784495	1.12048	0.584265	1.39676	0.898167	1.17966		-0.0787889	-0.23689	0.190253	-0.0251198	0.280282	0.220872	0.668903	0.121639
96	4.04979	3.14885	3.32035	3.83008	3.32035	3.83008	4.31327	4.04979	1.35076	2.92326	3.28353	4.04979	5.13149	5.08304	4.41003	5.39219	2.85651	5.15994	0.829436	1.46564	3.80941	1.46564	1.46564		1.18679	0.419233	3.88147	5.99945	3.80243	6.6714	7.87934	6.41813	7.27661	4.64556	0.788	1.12104	0.602604	1.35343	0.874383	1.19589		0.00831296	-0.263814	0.127708	-0.0277989	0.260121	0.108283	0.64546	0.224084
97	4.12822	3.11166	3.3554	3.98574	3.3554	3.98574	4.32427	4.12822	1.33816	3.50692	3.29213	4.12822	5.00327	5.67843	4.56295	5.8834	2.88397	5.42682	0.793498	1.78559	3.92194	1.78559	1.78559		1.2445	0.470912	3.8752	5.86366	3.67749	6.83537	7.51304	6.48844	7.39908	4.56863	0.862811	1.12642	0.572737	1.4561	0.884278	1.14349		0.0399083	-0.245884	0.19664	-0.111161	0.166212	0.198456	0.920469	0.0769561
98	4.09528	3.17161	3.33553	3.83416	3.33553	3.83416	4.14457	4.09528	1.33524	3.06697	3.30584	4.09528	5.20258	5.15158	4.41919	6.03487	2.92836	5.2752	0.792003	2.20173	3.28444	2.20173	2.20173		1.18903	0.447556	3.86376	5.86814	3.92073	7.09805	7.92334	6.6174	7.6509	4.47532	0.729816	1.12282	0.576981	1.50127	0.834693	1.15329		0.000722384	-0.262566	0.254586	-0.123392	0.118736	0.155686	0.655732	0.149829
99	3.98931	3.02416	3.38686	3.69522	3.38686	3.69522	4.15233	3.98931	1.24331	3.22436	3.30697	3.98931	4.78009	5.25359	4.61821	5.6964	2.88701	5.03716	0.865486	2.08416	3.69041	2.08416	2.08416		1.22804	0.47748	3.85323	6.0154	3.6067	7.43357	8.12508	6.46311	7.08852	4.42009	0.781866	1.09748	0.588924	1.37347	0.875881	1.12905		-0.0501729	-0.195999	0.137163	-0.0818106	0.224638	0.213179	0.562299	0.0571105
100	4.08119	3.1652	3.32634	3.69212	3.32634	3.69212	4.28027	4.08119	1.34391	3.1101	3.30468	4.08119	5.16959	5.18542	4.4741	6.20734	2.8894	5.34965	0.92333	1.69276	3.69329	1.69276	1.69276		1.28246	0.390342	3.7721	6.0746	3.84683	7.07597	7.60781	6.53974	7.19656	4.58934	0.781529	1.12454	0.587343	1.35972	0.924552	1.15401		-0.0896589	-0.148589	0.296595	-0.0820828	0.193558	0.167322	0.661443	0.14394
101	4.0337	3.03018	3.37246	3.70019	3.37246	3.70019	4.45784	4.0337	1.2651	2.99872	3.26721	4.0337	4.93598	5.54535	4.65635	5.70694	2.88913	5.20049	0.83693	1.58166	3.14966	1.58166	1.58166		1.29619	0.383406	4.00189	5.90202	3.76598	7.75302	7.45819	6.91396	7.385	4.47224	0.741827	1.10093	0.58304	1.33479	0.892497	1.09122		0.0220817	-0.227532	0.147808	-0.173681	0.25015	0.0745768	0.626535	0.0636997
102	4.02214	3.16163	3.3639	3.91492	3.3639	3.91492	4.26763	4.02214	1.41427	3.41293	3.39695	4.02214	5.10645	5.72564	4.59898	5.84249	2.88924	5.58344	0.881443	1.50365	3.59637	1.50365	1.50365		1.23171	0.500244	4.03896	5.94234	3.76345	7.18287	7.27791	6.64035	7.43533	4.4988	0.743397	1.08391	0.566813	1.29537	0.887408	1.1434		-0.0197496	-0.196784	0.147189	-0.12225	0.217786	0.244772	0.724272	-0.00507871
103	4.09836	3.02368	3.33537	3.64717	3.33537	3.64717	4.26216	4.09836	1.3471	3.32263	3.35002	4.09836	4.86919	5.58597	4.51448	5.99314	2.92064	5.44864	0.813591	1.94022	3.63406	1.94022	1.94022		1.28044	0.432842	3.98513	5.81013	3.72342	7.72496	6.89695	6.57757	7.24913	4.42792	0.724386	1.10539	0.560188	1.3211	0.902488	1.13473		0.0167585	-0.200204	0.208615	-0.0771217	0.231551	0.186734	0.5311	0.0688659
104	4.07992	3.11382	3.38429	3.70412	3.38429	3.70412	4.07616	4.07992	1.29038	3.36743	3.25026	4.07992	4.85912	5.66897	4.59775	5.76979	2.92573	5.31612	0.755174	1.91023	3.65777	1.91023	1.91023		1.22946	0.501277	4.03273	5.93523	3.76762	7.85172	7.51061	6.3626	7.17148	4.52362	0.710577	1.04313	0.608768	1.25824	0.833044	1.12009		0.0223988	-0.174286	0.248723	-0.0443717	0.209557	0.203145	0.54572	0.190884
105	3.95868	3.10064	3.34255	4.05858	3.34255	4.05858	4.17707	3.95868	1.31701	3.01749	3.40595	3.95868	5.16362	5.92419	4.31117	5.99225	2.94785	5.50387	0.803998	2.47582	3.99787	2.47582	2.47582		1.28521	0.474478	3.68545	5.93294	3.59643	8.20743	8.22799	6.55003	6.8951	4.33188	0.662871	1.05586	0.599832	1.26816	0.822169	1.1023		-0.00659793	-0.10613	0.178739	-0.166585	0.287837	0.230362	0.673165	0.00698872
106	4.07401	3.1175	3.31389	3.78247	3.31389	3.78247	4.15693	4.07401	1.29666	3.1336	3.31575	4.07401	5.07223	5.83219	4.47009	6.18768	2.92925	5.41094	0.811683	2.2581	3.5546	2.2581	2.2581		1.2924	0.434907	3.95283	5.83721	3.72532	8.20585	7.67325	6.58656	7.30324	4.3315	0.653828	1.07269	0.579872	1.32532	0.834097	1.14588		-0.0402215	-0.211594	0.12052	-0.217842	0.131951	0.0335502	0.69064	-0.0274972
107	4.12708	3.05872	3.31449	3.53105	3.31449	3.53105	4.27398	4.12708	1.38578	3.01327	3.293	4.12708	5.08811	6.09733	4.60384	6.39345	2.9495	5.36938	0.879215	2.28137	3.4531	2.28137	2.28137		1.32022	0.463971	3.84751	6.01196	3.7633	7.5083	7.82994	6.21905	7.22971	4.46303	0.656201	1.08013	0.586127	1.3118	0.821583	1.10693		-0.0657958	-0.1667	0.246985	-0.115129	0.157339	0.155828	0.631735	-0.0298174
108	4.06846	3.09432	3.28575	3.56228	3.28575	3.56228	3.93241	4.06846	1.25053	3.15	3.36043	4.06846	4.51854	6.25517	4.49595	6.09336	2.92546	5.16304	0.885913	2.03538	3.41351	2.03538	2.03538		1.31849	0.47561	4.02339	5.98355	3.76261	7.99678	7.42101	6.26631	7.00572	4.27134	0.723911	1.05167	0.553155	1.27178	0.831998	1.12458		-0.0530093	-0.188895	0.186131	-0.0805695	0.121397	0.1106	0.426032	0.00379166
109	4.1215	3.08324	3.29132	3.82034	3.29132	3.82034	4.22391	4.1215	1.23065	2.98908	3.27871	4.1215	4.62556	5.86808	4.44423	5.9023	2.95963	5.37609	0.798255	1.79981	3.58598	1.79981	1.79981		1.28147	0.427871	3.95327	6.04956	3.51532	7.93371	7.7911	6.61244	6.76937	4.28168	0.660919	1.07371	0.577947	1.3527	0.84788	1.07906		-0.00121099	-0.243852	0.207241	-0.111433	0.197902	0.10351	0.611659	0.0452382
110	4.1874	3.16855	3.33666	3.6814	3.33666	3.6814	4.07649	4.1874	1.24199	3.15421	3.36035	4.1874	5.08602	5.97853	4.43716	5.66025	2.91498	5.25723	0.844487	1.62708	3.66528	1.62708	1.62708		1.25308	0.483311	3.94429	5.93895	3.46233	7.98733	8.1069	6.41428	6.60962	4.19824	0.667325	1.04409	0.592522	1.30732	0.854657	1.00452		0.00406551	-0.268261	0.170175	-0.0871448	0.233203	0.237367	0.602112	0.0123109
111	4.03787	3.1048	3.3516	3.94993	3.3516	3.94993	4.25127	4.03787	1.3135	3.03481	3.40668	4.03787	5.21973	6.2472	4.44988	5.6305	2.9432	5.32156	0.780851	1.34514	3.59686	1.34514	1.34514		1.30435	0.515008	3.94151	5.89645	3.25533	8.25693	7.64095	6.45319	6.66442	4.17936	0.574059	1.03785	0.587887	1.31284	0.831284	1.07848		0.0635492	-0.237392	0.058042	-0.17904	0.347243	0.0941317	0.437283	0.0352179
112	4.05704	3.20951	3.3243	3.91172	3.3243	3.91172	3.99605	4.05704	1.25865	3.21662	3.28353	4.05704	4.94589	5.71395	4.46939	5.92304	2.97541	5.34731	0.800896	1.81757	3.47541	1.81757	1.81757		1.27865	0.443003	4.00877	5.99302	3.52749	8.24369	7.94181	6.43934	6.65342	4.23808	0.623837	1.04586	0.586746	1.29923	0.804404	1.11118		0.0735474	-0.258059	0.133889	-0.0890056	0.20971	0.0373816	0.618479	0.0271277
113	3.92301	3.13532	3.36691	3.86175	3.36691	3.86175	4.17203	3.92301	1.28807	3.32603	3.39792	3.92301	4.92628	6.01423	4.49589	6.13814	2.95351	5.5379	0.802678	1.45875	3.90699	1.45875	1.45875		1.26672	0.539097	4.08986	6.03476	3.38326	8.25568	7.76204	6.49514	6.80337	4.02706	0.598502	1.01894	0.580372	1.32779	0.855459	1.0302		0.13029	-0.270254	0.0831322	-0.191345	0.307353	0.186535	0.539156	0.108128
114	4.18951	3.22693	3.36961	3.93587	3.36961	3.93587	3.83665	4.18951	1.28831	3.35369	3.44448	4.18951	5.23806	6.24136	4.65076	5.93136	2.93754	5.08739	0.824171	1.91204	3.52691	1.91204	1.91204		1.3128	0.409686	3.98473	6.01867	3.45111	8.70158	7.51686	6.31331	7.07134	4.02267	0.555989	1.04086	0.555758	1.27221	0.797204	1.08548		-0.0356427	-0.182034	0.109095	-0.0676927	0.205245	0.209949	0.675508	0.0121159
115	4.13059	3.09313	3.33723	3.62037	3.33723	3.62037	4.04481	4.13059	1.32712	3.22228	3.39591	4.13059	4.83015	6.16837	4.60371	6.10947	2.96718	5.41442	0.79474	1.93496	3.33687	1.93496	1.93496		1.27627	0.442512	4.04675	6.04231	3.35451	8.33357	7.8416	6.56389	6.63143	4.16301	0.506093	1.02265	0.538834	1.27964	0.775078	1.0382		0.0243633	-0.199702	0.110767	-0.113095	0.217663	0.2012	0.698014	0.0145141
116	4.14305	3.14963	3.40387	3.65902	3.40387	3.65902	4.1867	4.14305	1.2071	3.16674	3.26058	4.14305	5.0527	5.82672	4.47018	5.99117	2.99414	5.55903	0.819303	1.82179	2.95016	1.82179	1.82179		1.2837	0.450017	4.13058	5.87639	3.13787	7.79969	8.25298	6.45705	6.63642	4.04085	0.534404	1.02788	0.586859	1.19733	0.714438	1.03573		0.0508251	-0.255142	0.215711	-0.185119	0.164131	0.23185	0.684803	0.179245
117	3.89916	3.16953	3.35437	3.99105	3.35437	3.99105	3.99633	3.89916	1.20359	3.23209	3.35594	3.89916	5.20016	5.76968	4.51354	5.81356	2.97589	5.43726	0.766517	1.70776	3.42754	1.70776	1.70776		1.27158	0.476079	4.10178	5.90188	3.38806	8.53979	7.78838	6.20666	6.81867	4.16253	0.522339	1.01656	0.595383	1.28855	0.780652	1.05669		-0.0361339	-0.179317	0.201861	-0.111929	0.185269	0.21115	0.565326	0.0653754
118	4.04782	3.15228	3.31412	3.82919	3.31412	3.82919	3.83588	4.04782	1.33779	3.26835	3.26232	4.04782	5.14675	5.52467	4.37429	5.86703	2.94894	5.38039	0.822548	1.85265	3.7901	1.85265	1.85265		1.33127	0.524037	4.03376	5.94855	3.23073	8.36257	8.07675	6.55416	6.74756	4.11689	0.438273	1.00349	0.56274	1.27998	0.763845	0.971008		0.00782182	-0.16189	0.129974	-0.142469	0.285176	0.179016	0.751764	0.0369529
119	3.89565	3.16021	3.33022	3.87926	3.33022	3.87926	4.32284	3.89565	1.21091	3.10121	3.34804	3.89565	4.93148	5.71905	4.62904	6.26171	3.00188	5.47926	0.777748	1.68259	3.49809	1.68259	1.68259		1.28461	0.499407	4.00181	5.93403	3.41434	7.15165	7.07671	6.87119	6.85921	4.07771	0.527412	1.00845	0.549048	1.26812	0.730516	0.990324		0.0366912	-0.266411	0.0910319	-0.178173	0.218428	0.165492	0.69972	0.0976598
120	4.04986	3.1997	3.3342	3.93842	3.3342	3.93842	4.2783	4.04986	1.18495	3.0907	3.41639	4.04986	5.28132	6.14389	4.56453	5.77157	3.06902	5.53151	0.763002	2.27827	2.76083	2.27827	2.27827		1.29325	0.510455	4.15887	6.04553	3.165	7.52913	7.42237	6.43254	6.95368	4.07957	0.486297	0.964664	0.567359	1.22135	0.788711	0.977466		0.0508576	-0.144202	0.154149	-0.140436	0.0968943	0.2878	0.515883	0.0296226
121	3.98891	3.15226	3.3275	3.98308	3.3275	3.98308	3.8934	3.98891	1.1628	3.47655	3.40777	3.98891	5.07673	5.78814	4.37776	5.91702	3.03422	5.53442	0.809901	2.01262	3.06797	2.01262	2.01262		1.31044	0.499749	4.00905	5.9579	3.1779	7.88451	7.84513	6.55544	6.30353	3.97523	0.411795	0.980509	0.549735	1.19909	0.802293	1.05936		0.0218284	-0.214573	0.175761	-0.0863248	0.185025	0.130155	0.527049	0.0368749
122	4.02374	3.13195	3.30451	3.76658	3.30451	3.76658	3.9949	4.02374	1.22216	3.5344	3.47937	4.02374	4.97237	5.82385	4.45395	6.13979	3.07777	5.62665	0.794278	1.68561	3.06384	1.68561	1.68561		1.31627	0.500194	4.01374	5.8746	3.14219	8.09012	8.21008	6.52589	6.19532	3.9004	0.495378	0.972739	0.527309	1.32536	0.761684	1.0178		0.0335703	-0.145147	0.288857	-0.105976	0.313502	0.201059	0.523214	0.0990252
123	3.9682	3.1346	3.33553	3.77731	3.33553	3.77731	3.8859	3.9682	1.12316	3.54619	3.4437	3.9682	4.98772	5.92029	4.53422	6.44274	3.04605	5.30176	0.74679	2.05296	3.30913	2.05296	2.05296		1.26953	0.536859	4.00662	6.09565	3.04596	7.6994	7.97303	6.81676	6.57836	3.97182	0.460578	0.977938	0.5241	1.19088	0.733111	0.996434		0.00752038	-0.256409	0.288078	-0.1712	0.361252	0.259609	0.628027	0.0279842
124	3.95711	3.23768	3.3806	4.11518	3.3806	4.11518	4.07392	3.95711	1.23534	3.62846	3.37961	3.95711	5.37058	6.28457	4.63021	6.15571	3.00147	5.60729	0.73559	1.86334	3.32469	1.86334	1.86334		1.2854	0.515895	4.14107	5.87334	3.11116	7.77793	7.79843	6.48109	6.78826	4.00012	0.418549	0.945105	0.585037	1.31362	0.742093	1.03899		0.0343303	-0.201875	0.232789	-0.0878878	0.257858	0.174355	0.564815	-0.00864551
125	3.90063	3.19736	3.33338	3.60192	3.33338	3.60192	3.92081	3.90063	1.22599	3.36651	3.42412	3.90063	5.35941	6.53441	4.58992	6.23291	3.05688	5.55378	0.814132	1.47236	3.92804	1.47236	1.47236		1.3047	0.630123	4.04301	6.02796	3.00756	8.29856	8.36838	6.42795	6.64398	3.8773	0.414908	0.94949	0.562387	1.27961	0.744443	1.02869		0.0540734	-0.156537	0.268207	-0.116271	0.261805	0.191995	0.579095	-0.108128
126	3.93269	3.1967	3.35029	3.72916	3.35029	3.72916	3.77372	3.93269	1.10002	3.55918	3.38145	3.93269	4.95522	6.7198	4.70422	6.24077	3.11574	5.64113	0.797094	1.74379	3.13215	1.74379	1.74379		1.32167	0.510851	3.93444	6.09634	2.90743	8.00592	8.29126	6.30624	6.17744	4.0064	0.374065	0.912684	0.615327	1.17192	0.772756	0.985399		-0.0682359	-0.162031	0.262553	-0.212682	0.259235	0.153342	0.537577	0.0775412
127	3.98737	3.17954	3.39403	4.01608	3.39403	4.01608	3.88306	3.98737	1.07197	3.45375	3.41856	3.98737	5.49909	6.3608	4.39282	6.3807	3.09084	5.48008	0.846952	2.25965	3.36744	2.25965	2.25965		1.28333	0.548671	4.05923	6.10158	2.89768	8.04566	8.14435	6.59381	6.21729	3.97467	0.378885	0.928506	0.54482	1.25299	0.68764	0.984347		0.0509199	-0.114138	0.112185	-0.181422	0.0770719	0.197798	0.730452	-0.021142
128	3.7839	3.15999	3.31462	3.91088	3.31462	3.91088	3.94314	3.7839	1.09884	3.75306	3.39628	3.7839	5.22251	6.72554	4.62143	6.79231	3.09012	5.55441	0.788694	1.26705	3.11752	1.26705	1.26705		1.23485	0.490866	4.05656	6.14016	2.89547	8.02422	8.46911	6.47761	6.63487	3.82199	0.387921	0.939367	0.55097	1.17446	0.761567	0.990631		0.0780002	-0.148287	0.215482	-0.164378	0.370215	0.181417	0.555908	0.0191732
129	3.92698	3.16664	3.33893	3.84621	3.33893	3.84621	4.18199	3.92698	1.20461	3.52332	3.49493	3.92698	5.38098	6.54804	4.82152	6.54474	3.09545	5.43068	0.800069	1.8205	3.40029	1.8205	1.8205		1.26549	0.527116	4.13384	5.98745	2.96452	8.09516	8.45173	6.3916	6.53181	3.7484	0.370506	0.949369	0.566411	1.23498	0.749466	0.974503		0.0839263	-0.197045	0.243734	-0.130091	0.183801	0.21704	0.649594	0.0364848
130	4.05013	3.26287	3.33925	4.02199	3.33925	4.02199	3.61153	4.05013	1.1412	3.68948	3.51587	4.05013	5.54198	6.66035	4.57103	6.53668	3.13852	5.65062	0.807324	1.26309	3.40785	1.26309	1.26309		1.28949	0.570644	4.04874	6.04755	2.90627	8.1289	7.94804	6.34186	6.54521	3.67626	0.33211	0.93389	0.571474	1.23605	0.712377	0.94165		0.111402	-0.22552	0.194238	-0.13979	0.241493	0.16372	0.577645	0.00589646
131	3.97775	3.11621	3.30554	3.77878	3.30554	3.77878	3.62319	3.97775	1.11337	3.64936	3.51334	3.97775	5.39718	6.16197	4.53308	6.431	3.10868	5.65644	0.836977	2.22431	3.55253	2.22431	2.22431		1.27937	0.529723	4.13209	6.0835	2.85365	8.05481	8.03168	6.41335	6.43751	3.79999	0.374494	0.909926	0.55575	1.33007	0.753955	0.984746		0.0630893	-0.237473	0.152547	-0.24496	0.144339	0.178415	0.548788	-0.00388978
132	3.98978	3.15139	3.3141	3.81768	3.3141	3.81768	3.69903	3.98978	1.108	3.81841	3.50993	3.98978	5.16779	6.744	4.57163	6.26887	3.09574	5.45902	0.850388	1.7718	3.45104	1.7718	1.7718		1.29846	0.590848	4.03535	6.02466	2.93945	7.85867	7.81743	6.25264	6.35145	3.70041	0.338919	0.942195	0.550262	1.18897	0.764987	1.01847		0.0477041	-0.212198	0.0807966	-0.205785	0.214116	0.210321	0.573511	-0.0289015
133	3.92448	3.1437	3.29645	3.89333	3.29645	3.89333	3.97663	3.92448	1.06701	3.93521	3.5677	3.92448	5.24723	6.32992	4.70722	6.70731	3.11838	5.52601	0.824187	1.15724	3.45746	1.15724	1.15724		1.26465	0.567005	4.174	6.12751	2.82589	7.38186	7.93881	6.33203	6.36416	3.55729	0.315372	0.937436	0.594936	1.24478	0.780446	0.988756		0.138354	-0.236306	0.149709	-0.138525	0.297717	0.229334	0.454334	0.0962555
134	4.00784	3.29394	3.38015	4.15989	3.38015	4.15989	3.69476	4.00784	1.07849	3.72257	3.58275	4.00784	5.5216	6.53775	4.46782	6.82238	3.11465	5.50305	0.788376	1.26929	3.49058	1.26929	1.26929		1.27533	0.569316	4.05954	6.12668	2.66487	7.88609	8.22609	6.25677	5.86105	3.52262	0.306253	0.909236	0.535803	1.20406	0.812952	0.921323		0.0493997	-0.201111	0.34378	-0.18502	0.185269	0.146337	0.554032	0.00622889
135	4.04585	3.19276	3.31946	4.21625	3.31946	4.21625	4.05679	4.04585	1.10636	3.60894	3.50675	4.04585	5.35802	6.19694	4.75966	6.86006	3.15629	5.74348	0.826573	1.49521	3.3626	1.49521	1.49521		1.28355	0.595846	4.14723	6.02105	2.90105	7.51683	8.00425	6.45834	6.31142	3.60347	0.275187	0.921006	0.581355	1.19636	0.788599	0.979704		0.0448522	-0.1733	0.225166	-0.0914108	0.19258	0.197026	0.715065	-0.0364456
136	3.81964	3.25049	3.33909	3.81006	3.33909	3.81006	3.81734	3.81964	1.09381	3.57378	3.41453	3.81964	5.33657	6.37499	4.73182	6.36871	3.12541	5.58022	0.864484	2.3193	3.09076	2.3193	2.3193		1.29442	0.58524	4.15585	5.93971	2.93771	7.19234	7.57062	6.34076	6.30542	3.61248	0.289543	0.863951	0.611581	1.13001	0.816783	1.022		0.0542956	-0.194208	0.167451	-0.144727	0.249355	0.134158	0.74682	0.0616916
137	3.87241	3.18788	3.42308	3.85737	3.42308	3.85737	3.76748	3.87241	1.03278	3.49895	3.55829	3.87241	5.05897	5.94042	4.49926	6.40532	3.17497	5.63063	0.712045	1.06424	2.97083	1.06424	1.06424		1.30322	0.572859	4.20245	6.10172	2.80098	7.39604	7.93176	6.52295	6.36245	3.5497	0.210943	0.872982	0.564896	1.25201	0.798355	0.967525		0.107995	-0.273856	0.209873	-0.154032	0.247274	0.230392	0.721202	0.0996476
138	3.98476	3.21524	3.29352	4.09354	3.29352	4.09354	3.73558	3.98476	1.06653	3.89393	3.49965	3.98476	5.19444	6.54322	4.52168	6.63405	3.08672	5.60065	0.728336	1.7749	3.34514	1.7749	1.7749		1.2677	0.599217	4.15076	6.05549	2.83179	7.89113	7.82911	6.31772	6.10136	3.47218	0.262428	0.865371	0.562323	1.15451	0.821087	0.928067		0.0523466	-0.193604	0.173747	-0.16465	0.171075	0.278593	0.602793	0.0660776
139	3.9519	3.12958	3.27476	3.82885	3.27476	3.82885	3.80502	3.9519	1.06723	3.71379	3.47404	3.9519	5.03142	6.17449	4.63036	7.07287	3.14772	5.5243	0.827861	1.97668	3.03914	1.97668	1.97668		1.28806	0.546997	4.27638	6.02317	2.86266	7.72463	7.37431	6.43676	6.09808	3.62204	0.24358	0.868011	0.572287	1.21266	0.781042	0.997568		0.0808522	-0.184388	0.0646808	-0.192686	0.189888	0.173354	0.497937	0.0330537
140	3.94221	3.3093	3.3264	3.8527	3.3264	3.8527	4.00979	3.94221	1.02684	3.48752	3.5063	3.94221	5.28046	6.0875	4.68843	7.02885	3.13387	5.59065	0.898274	1.05355	3.04632	1.05355	1.05355		1.28256	0.628745	4.05144	6.07072	2.66097	8.03021	7.74168	6.32634	6.15048	3.55978	0.254296	0.860042	0.555664	1.12682	0.733295	1.02875		0.105729	-0.24029	0.260653	-0.0445959	0.2258	0.16798	0.529905	0.0380638
141	3.88326	3.1742	3.32203	3.73943	3.32203	3.73943	3.79348	3.88326	1.13175	3.70184	3.45277	3.88326	5.36813	6.59293	4.60394	6.66507	3.17065	5.76916	0.862893	2.06227	3.03202	2.06227	2.06227		1.27175	0.618238	4.07265	6.11979	2.65739	7.60386	7.84026	6.13359	6.02749	3.46039	0.253045	0.85203	0.572424	1.16172	0.775857	0.972327		0.113619	-0.247032	0.179333	-0.128379	0.219346	0.124838	0.623039	-0.0112184
142	3.93069	3.22363	3.31313	3.95087	3.31313	3.95087	4.06971	3.93069	1.06374	3.9034	3.5836	3.93069	5.49561	6.22234	4.57965	6.98241	3.18541	5.65638	0.814212	2.09632	2.9934	2.09632	2.09632		1.29542	0.651482	4.01636	5.98252	2.70885	7.22987	7.89998	6.51157	6.12781	3.54217	0.202657	0.835701	0.559636	1.20049	0.825354	0.99741		0.0668131	-0.237009	0.1479	-0.117313	0.227911	0.245259	0.693752	0.0582028
143	3.96195	3.19539	3.34917	3.98225	3.34917	3.98225	3.85958	3.96195	1.1353	3.79081	3.58504	3.96195	5.26176	6.9828	4.64599	6.42523	3.20027	5.58819	0.844216	1.82386	3.34743	1.82386	1.82386		1.26199	0.626112	4.15112	6.22103	2.51323	7.83028	7.86768	6.26108	5.90639	3.28441	0.213225	0.843787	0.582216	1.11498	0.775478	0.945333		0.0381971	-0.271259	0.206393	-0.175071	0.257002	0.219499	0.436686	-0.0359774
144	3.97027	3.24499	3.30726	3.99671	3.30726	3.99671	3.74604	3.97027	1.08965	4.13856	3.54248	3.97027	5.34165	6.56436	4.82329	6.13332	3.18862	5.57667	0.810743	1.41591	3.42243	1.41591	1.41591		1.24784	0.618753	4.1533	6.21829	2.74272	7.51841	8.32738	6.71542	5.97613	3.26777	0.202565	0.832642	0.600238	1.1127	0.808669	0.959142		0.0302258	-0.219483	0.198518	-0.236228	0.142902	0.230221	0.685525	0.0170684
145	3.87097	3.24525	3.32093	4.16083	3.32093	4.16083	3.7503	3.87097	1.13139	4.46956	3.59966	3.87097	5.32143	6.28077	4.70924	6.79408	3.14898	5.70154	0.72797	1.30989	3.31762	1.30989	1.30989		1.2762	0.625816	4.24778	6.23477	2.53667	7.61458	8.10717	6.20399	6.02594	3.34237	0.219367	0.806366	0.573363	1.19513	0.813414	0.942585		0.1497	-0.159677	0.079493	-0.127559	0.174562	0.249746	0.682414	0.0506571
146	3.74546	3.22119	3.26149	3.91767	3.26149	3.91767	3.87868	3.74546	1.13379	3.99601	3.5879	3.74546	5.45194	7.10003	4.72376	6.47858	3.13927	5.59546	0.780406	1.75637	2.72548	1.75637	1.75637		1.26729	0.623874	4.22005	6.21663	2.63748	7.21314	7.97792	6.40757	6.31264	3.28194	0.246838	0.806163	0.54036	1.15234	0.777712	0.954171		0.189915	-0.138869	0.172762	-0.138203	0.13293	0.168894	0.52509	0.0604433
147	3.94505	3.32369	3.39672	3.98933	3.39672	3.98933	3.8152	3.94505	1.07103	3.92389	3.72212	3.94505	5.46582	6.61853	4.66614	6.703	3.21052	5.65986	0.756908	1.76465	3.50015	1.76465	1.76465		1.28011	0.682047	4.34146	6.13336	2.73572	7.79496	7.78322	6.2575	6.02216	3.30025	0.287242	0.838654	0.585481	1.17301	0.730583	0.974299		0.0780794	-0.140217	0.0929771	-0.0655836	0.168934	0.19837	0.477477	0.00724313
148	3.82919	3.27804	3.33752	4.00969	3.33752	4.00969	3.81432	3.82919	1.0075	3.86963	3.61481	3.82919	6.01702	6.91798	4.8764	7.31169	3.19064	5.45579	0.79991	1.31386	3.27944	1.31386	1.31386		1.25995	0.612035	4.28536	6.17836	2.62284	7.57611	8.07404	6.04924	5.69426	3.28138	0.245142	0.778713	0.56179	1.21681	0.804648	0.954104		0.0696014	-0.241357	0.172441	-0.149863	0.316592	0.297348	0.528713	0.0235795
149	4.019	3.32458	3.36034	3.91993	3.36034	3.91993	3.6222	4.019	1.09525	3.89607	3.5997	4.019	5.86121	6.53478	4.59734	6.8527	3.14616	5.69775	0.781726	1.40944	3.17697	1.40944	1.40944		1.30186	0.643978	4.32593	6.13308	2.55753	7.49916	7.5413	6.50248	6.24942	3.15053	0.258777	0.801482	0.559963	1.0802	0.712416	0.983024		0.13959	-0.184327	0.173381	-0.195365	0.355257	0.24074	0.678323	-0.0199531
150	3.9708	3.25933	3.32059	4.07245	3.32059	4.07245	3.37098	3.9708	1.06032	4.25334	3.67495	3.9708	5.79147	6.75643	4.70321	6.58952	3.18593	5.88245	0.771496	1.60458	2.90681	1.60458	1.60458		1.24035	0.648408	4.21703	6.04484	2.50849	6.99368	7.73841	6.16103	6.18637	3.23809	0.303315	0.77567	0.617126	0.992556	0.831084	1.00817		0.0782847	-0.121785	0.0885347	-0.0550641	0.317876	0.275248	0.671119	0.0443409
151	3.9507	3.29691	3.24306	4.09276	3.24306	4.09276	3.47965	3.9507	1.17608	4.08602	3.68343	3.9507	5.59081	6.40495	4.76835	6.82891	3.24471	5.95153	0.783555	1.72974	2.69546	1.72974	1.72974		1.22401	0.614227	4.23022	6.11157	2.4949	6.92241	7.67814	6.44686	5.66901	3.15448	0.295119	0.800515	0.532743	1.16416	0.85107	0.92586		0.0934334	-0.156397	0.147304	-0.0792547	0.211149	0.31213	0.472917	0.105711
152	3.75367	3.25683	3.36621	4.08617	3.36621	4.08617	3.67922	3.75367	1.06891	4.25611	3.60682	3.75367	5.5094	6.69513	4.88783	6.7167	3.20447	5.53613	0.770446	1.36419	2.98166	1.36419	1.36419		1.22326	0.64939	4.33312	6.15791	2.5658	7.04949	7.80901	6.40253	5.91102	3.15556	0.26805	0.790993	0.574655	1.15229	0.800806	0.919285		0.100073	-0.239727	0.126265	-0.0840925	0.177805	0.194081	0.578285	0.0553551
153	3.8841	3.25659	3.32901	4.07373	3.32901	4.07373	3.70012	3.8841	0.986927	4.0911	3.69462	3.8841	5.58602	6.42331	4.7303	6.95304	3.24886	5.8488	0.755269	1.80757	3.35542	1.80757	1.80757		1.25116	0.65131	4.29887	6.19436	2.65007	7.43136	7.72702	6.53277	5.95053	3.1137	0.327793	0.768473	0.572919	1.11187	0.77916	0.926391		0.114998	-0.243791	0.11649	-0.125748	0.302397	0.205118	0.47475	0.00392904
154	3.84849	3.29398	3.32323	4.09659	3.32323	4.09659	3.59074	3.84849	1.08453	4.23747	3.70318	3.84849	6.10173	6.28995	4.70071	6.70959	3.22631	5.64879	0.762412	1.55227	3.37984	1.55227	1.55227		1.26483	0.616	4.32795	6.12679	2.50575	7.31815	7.93828	5.99031	5.60579	2.9912	0.34141	0.765953	0.552916	1.13565	0.837834	0.982145		0.0652916	-0.258159	0.222327	-0.228163	0.17652	0.0924159	0.617966	0.0452958
155	3.7161	3.23155	3.34278	4.0479	3.34278	4.0479	3.7375	3.7161	1.10119	4.35813	3.72147	3.7161	5.4666	7.00293	4.77542	6.58248	3.19513	5.78213	0.735495	1.27757	3.32828	1.27757	1.27757		1.2512	0.66354	4.22792	6.18941	2.4584	7.07661	7.76504	6.25273	5.65594	3.01089	0.311904	0.760375	0.596877	1.08947	0.838179	0.955024		0.042047	-0.138045	0.214201	-0.0974897	0.283584	0.265842	0.618053	0.0807179
156	3.93831	3.30725	3.35231	3.92741	3.35231	3.92741	3.39604	3.93831	1.06305	4.4254	3.66757	3.93831	5.58671	6.92967	4.75537	6.77563	3.20999	5.583	0.840604	1.48719	2.70775	1.48719	1.48719		1.21734	0.569466	4.5011	6.14696	2.63759	7.11508	7.30125	6.50863	5.86191	3.05746	0.318657	0.765742	0.59031	1.19798	0.742077	0.957982		0.130416	-0.150159	0.202068	-0.182488	0.211332	0.303151	0.628153	0.0701142
157	3.90678	3.35087	3.32472	4.11125	3.32472	4.11125	3.85159	3.90678	1.13119	4.39261	3.70589	3.90678	5.81296	7.20872	4.50896	6.96421	3.23612	5.54985	0.725981	1.91428	3.12927	1.91428	1.91428		1.24253	0.598971	4.26816	6.21205	2.63095	6.3286	7.48861	6.47825	5.68549	3.1633	0.25269	0.774956	0.559249	1.17464	0.810964	1.00988		0.111829	-0.235742	0.0990909	-0.24352	0.3964	0.180873	0.595036	0.0248855
158	3.71396	3.3	3.29562	4.01741	3.29562	4.01741	3.60157	3.71396	1.05713	4.09659	3.69829	3.71396	5.41707	6.5396	4.64508	6.59288	3.20906	5.59837	0.765165	2.28111	3.04997	2.28111	2.28111		1.22476	0.659997	4.46482	6.14635	2.41378	7.0583	7.83021	6.42392	5.71864	3.16106	0.293175	0.71835	0.589658	1.18343	0.7985	0.906478		0.125742	-0.260574	0.136543	-0.215014	0.229868	0.221356	0.626022	-0.0377329
159	3.72936	3.27864	3.31773	4.04987	3.31773	4.04987	3.66817	3.72936	1.03812	4.37927	3.71839	3.72936	5.63219	6.46569	4.62212	6.67439	3.25446	5.92439	0.729338	1.46599	3.51402	1.46599	1.46599		1.26339	0.613831	4.33682	6.24311	2.57333	7.13431	7.39954	6.32845	5.52317	3.06564	0.280134	0.706687	0.617852	1.11182	0.811899	0.926748		0.113905	-0.25999	0.0960441	-0.122969	0.0897065	0.184906	0.465842	-0.00203768
160	3.67842	3.35175	3.32988	4.22329	3.32988	4.22329	3.70543	3.67842	1.06542	4.28337	3.69687	3.67842	5.68351	7.18961	4.65272	6.96123	3.23612	5.9421	0.776794	2.22888	3.05475	2.22888	2.22888		1.23829	0.613463	4.44376	6.08717	2.4663	6.85302	7.65207	6.10927	5.86276	3.08917	0.313801	0.709761	0.588291	1.14793	0.817546	0.957941		0.131684	-0.200547	0.128188	-0.236079	0.327696	0.207234	0.633141	-0.0324887
161	3.86129	3.26482	3.32943	3.94639	3.32943	3.94639	3.50833	3.86129	1.03997	4.39052	3.702	3.86129	5.75427	6.72722	4.60861	6.94658	3.20605	5.81028	0.817155	2.02366	3.08456	2.02366	2.02366		1.24684	0.633862	4.24623	6.13594	2.44923	7.19674	7.7186	6.49854	5.51716	3.13411	0.301317	0.689711	0.566968	1.11015	0.806988	0.961451		0.188853	-0.207691	0.157835	-0.187401	0.340329	0.198342	0.495806	-0.0855735
162	3.80771	3.33559	3.39136	4.09595	3.39136	4.09595	3.61919	3.80771	1.05602	4.51633	3.79586	3.80771	5.59167	6.62168	4.77504	6.8277	3.20253	6.05799	0.771242	1.66768	3.47611	1.66768	1.66768		1.2281	0.692159	4.36335	6.12534	2.4496	6.90316	8.19813	6.13937	5.45703	3.21543	0.266662	0.705564	0.590162	1.14726	0.826122	0.931326		0.07098	-0.269871	0.202983	-0.21298	0.195915	0.268101	0.47492	0.00956164
163	3.72388	3.27824	3.35699	3.95707	3.35699	3.95707	3.66165	3.72388	1.04464	4.18614	3.69734	3.72388	5.68052	6.5983	4.73781	6.93136	3.25671	5.82451	0.816296	2.13476	2.71455	2.13476	2.13476		1.21526	0.665632	4.47821	6.28037	2.48789	6.60107	7.56682	6.55076	5.7968	3.14106	0.280033	0.656463	0.565211	1.18386	0.800773	0.831771		0.161172	-0.244818	0.195817	-0.126492	0.329928	0.27379	0.470275	-0.0169901
164	3.85581	3.34212	3.30514	4.18807	3.30514	4.18807	3.59216	3.85581	1.04082	4.20479	3.6054	3.85581	6.05041	6.59683	4.4166	6.92107	3.26871	5.93192	0.793006	1.55701	2.42612	1.55701	1.55701		1.26347	0.549558	4.5388	5.87871	2.66355	6.64237	7.50681	6.69698	6.23361	3.21585	0.258631	0.661156	0.540354	1.16762	0.813933	0.919009		0.0905177	-0.189238	0.283362	-0.0787343	0.145257	0.194568	0.504971	-0.0292916
165	3.78363	3.32161	3.31415	4.15325	3.31415	4.15325	3.52808	3.78363	0.969367	4.68128	3.80874	3.78363	5.98035	6.66323	4.81208	7.5833	3.26729	6.0461	0.754665	1.77042	3.04306	1.77042	1.77042		1.18138	0.543135	4.6235	6.00004	2.5915	6.67927	7.21764	6.69284	6.25046	3.12494	0.270834	0.65463	0.620283	1.12673	0.795093	0.923597		0.152964	-0.128969	0.158385	-0.0403522	0.179395	0.206233	0.615494	0.0145921
166	3.84282	3.34221	3.36181	4.25319	3.36181	4.25319	3.50296	3.84282	1.01578	4.59347	3.66984	3.84282	5.91163	7.08843	4.53583	7.25276	3.26671	6.25105	0.770987	1.43642	2.88082	1.43642	1.43642		1.2284	0.575861	4.51536	6.09187	2.54731	6.1252	7.46172	6.49156	5.86929	3.08733	0.27787	0.648033	0.563881	1.1066	0.796134	0.910933		0.175195	-0.18795	0.121251	-0.241463	0.393159	0.194655	0.521723	-0.0560384
167	3.88306	3.31532	3.3316	4.23878	3.3316	4.23878	3.40879	3.88306	0.965567	4.52719	3.69768	3.88306	5.75537	7.09215	4.91034	6.87268	3.31166	6.21176	0.742909	1.46573	2.86069	1.46573	1.46573		1.20383	0.605612	4.5181	6.03353	2.66045	6.67705	7.58583	6.2698	5.93799	3.10679	0.285135	0.699045	0.569501	1.12307	0.744454	0.871582		0.15588	-0.19618	0.213696	-0.19147	0.264068	0.269703	0.410558	-0.0181197
168	3.82628	3.29958	3.35827	4.14873	3.35827	4.14873	3.51495	3.82628	1.04378	4.4735	3.71392	3.82628	5.65351	7.16828	4.85234	7.12311	3.27651	5.7987	0.736879	1.7175	3.00341	1.7175	1.7175		1.20792	0.561911	4.53351	6.18166	2.51939	7.00345	7.82422	6.42915	5.61558	3.18285	0.305797	0.660005	0.596508	1.17344	0.774883	0.897262		0.175797	-0.165835	0.112413	-0.158522	0.224729	0.140534	0.483956	0.076527
169	3.75464	3.34109	3.26193	4.15438	3.26193	4.15438	3.24955	3.75464	1.09711	4.48827	3.76237	3.75464	5.86154	7.07851	4.44473	6.99611	3.29454	6.15426	0.759994	1.93669	2.84329	1.93669	1.93669		1.20913	0.565527	4.46101	6.17142	2.57707	6.86817	7.32624	6.71616	5.58088	3.02509	0.297201	0.66366	0.636911	1.18891	0.841454	0.890728		0.176129	-0.190505	0.193322	-0.120612	0.278354	0.193311	0.467718	-0.039936
170	3.78276	3.3069	3.32823	4.23544	3.32823	4.23544	3.44179	3.78276	1.04905	4.22944	3.76168	3.78276	5.87463	7.04448	4.53027	6.94854	3.32833	6.04471	0.788105	2.21759	2.69138	2.21759	2.21759		1.20296	0.605221	4.57777	6.07511	2.50896	6.66193	7.50436	6.22602	5.48762	2.96118	0.230182	0.62544	0.58048	1.11218	0.757102	0.873426		0.0723274	-0.254134	0.0975787	-0.155197	0.19882	0.308383	0.57219	-0.0148649
171	3.6987	3.40276	3.33697	4.20908	3.33697	4.20908	3.63243	3.6987	1.07726	4.1583	3.71575	3.6987	5.96156	6.51345	4.44461	7.13706	3.27793	6.07324	0.744722	1.42522	3.27269	1.42522	1.42522		1.1974	0.621854	4.48727	5.97941	2.50838	6.76724	7.43159	6.38068	5.8327	2.97113	0.313839	0.635391	0.598026	0.967215	0.794563	0.869982		0.160412	-0.240693	0.15099	-0.196531	0.2258	0.197483	0.604881	0.0127791
172	3.73854	3.28575	3.24584	4.22929	3.24584	4.22929	3.66494	3.73854	0.987287	4.37476	3.72337	3.73854	5.98882	6.52384	4.57233	6.92659	3.267	5.70515	0.838027	1.58683	2.8007	1.58683	1.58683		1.20121	0.584648	4.50952	6.26977	2.5945	6.87668	7.20676	6.66899	6.06682	3.00344	0.274036	0.675756	0.61185	1.06216	0.800215	0.887954		0.149985	-0.246005	0.0577436	-0.148102	0.187624	0.19351	0.472832	-0.100955
173	3.8358	3.27106	3.34969	4.31974	3.34969	4.31974	3.22039	3.8358	0.930806	4.67696	3.73351	3.8358	5.82618	6.76951	4.64975	7.22643	3.30942	5.81085	0.760615	1.23033	3.34944	1.23033	1.23033		1.19263	0.654362	4.44035	6.13267	2.59866	6.5257	7.88803	6.64347	5.58261	2.99162	0.319506	0.664713	0.634117	1.04965	0.862604	0.872563		0.107488	-0.209784	0.201471	-0.103966	0.11375	0.259323	0.686036	-0.041398
174	3.75651	3.36138	3.33645	4.2404	3.33645	4.2404	3.20567	3.75651	1.00604	4.37644	3.76464	3.75651	6.05029	6.98076	4.68306	7.20531	3.27383	5.9607	0.823105	1.58519	3.35395	1.58519	1.58519		1.21908	0.503492	4.73307	6.19918	2.76379	6.3964	7.61433	6.3357	5.62606	2.8667	0.309886	0.647873	0.590156	1.08317	0.843586	0.888966		0.202939	-0.127017	0.19236	-0.177601	0.210719	0.262527	0.419808	-0.019407
175	3.58066	3.3565	3.34482	4.22501	3.34482	4.22501	3.32665	3.58066	1.00228	4.45998	3.79785	3.58066	5.8827	7.4198	4.80924	7.55977	3.28573	6.01213	0.75772	1.38858	2.54121	1.38858	1.38858		1.21106	0.601996	4.54464	6.04041	2.32924	6.37275	8.04336	6.53406	5.92683	2.89333	0.334884	0.646625	0.658215	1.11659	0.821205	0.936327		0.174814	-0.239585	0.135514	-0.185713	0.277957	0.238539	0.289166	-0.0148259
176	3.72912	3.33452	3.34569	4.00148	3.34569	4.00148	3.15078	3.72912	1.02614	4.62049	3.77277	3.72912	6.02942	6.80039	4.56368	7.39053	3.31973	6.00068	0.774122	2.73139	2.94685	2.73139	2.73139		1.20234	0.690239	4.57694	6.22744	2.30112	6.10218	7.6081	6.2597	5.63568	2.86957	0.362986	0.624054	0.663705	1.1069	0.793805	0.872348		0.201847	-0.172013	0.203943	-0.0825296	0.17028	0.302667	0.703343	-0.0385114
177	3.87374	3.28293	3.26581	4.14976	3.26581	4.14976	3.60556	3.87374	0.955161	4.69439	3.70622	3.87374	5.86853	6.84296	4.67387	7.22111	3.32707	5.99436	0.798605	1.5102	2.7679	1.5102	1.5102		1.17458	0.583493	4.31369	6.22707	2.48457	7.10184	8.28175	6.33809	5.49758	2.86934	0.297045	0.644472	0.616582	1.05809	0.71328	0.890673		0.178109	-0.26478	0.0597808	-0.17058	0.262723	0.221527	0.476285	-0.070309
178	3.8014	3.31832	3.2641	4.10269	3.2641	4.10269	3.44387	3.8014	0.936317	4.48943	3.78658	3.8014	5.87782	6.71145	4.53112	6.75165	3.3662	6.01225	0.73454	1.60338	2.75833	1.60338	1.60338		1.21584	0.608787	4.46967	6.18393	2.43422	6.12049	7.42317	6.25998	5.58965	2.80651	0.300888	0.608271	0.565736	1.11663	0.843342	0.942192		0.141429	-0.207509	0.147716	-0.0409976	0.240667	0.368023	0.533998	-0.0747137
179	3.70621	3.36931	3.32702	4.16938	3.32702	4.16938	3.14274	3.70621	0.945046	4.61916	3.75196	3.70621	6.1409	6.59237	4.61739	7.37132	3.32827	6.20607	0.798176	2.04658	2.97589	2.04658	2.04658		1.23427	0.65382	4.37861	6.19534	2.57528	6.37685	8.01294	6.46852	5.58227	2.71406	0.321094	0.59871	0.58027	1.08263	0.762614	0.857447		0.20866	-0.147401	0.193138	-0.17182	0.160767	0.250491	0.425263	0.0542646
180	3.82799	3.36946	3.28753	4.22275	3.28753	4.22275	3.27204	3.82799	0.873163	4.91743	3.80408	3.82799	5.98915	6.59728	4.82259	7.37512	3.29143	6.11878	0.872326	2.90265	2.52881	2.90265	2.90265		1.18792	0.598599	4.57805	6.29361	2.34863	6.25796	7.46255	6.53626	5.66729	2.75953	0.320263	0.628884	0.618595	1.05245	0.788137	0.885012		0.145913	-0.181168	0.234667	-0.247863	0.123201	0.0554492	0.484981	-0.00537043
181	3.73534	3.39805	3.361	4.23234	3.361	4.23234	3.11587	3.73534	0.94152	4.8549	3.81235	3.73534	6.1567	7.28644	4.78316	7.20462	3.29908	6.11669	0.845902	2.21897	2.88294	2.21897	2.21897		1.18684	0.645551	4.63478	6.20133	2.70137	6.50709	7.99773	6.68761	5.65011	2.72747	0.341703	0.59926	0.601695	1.06361	0.761066	0.878304		0.137689	-0.181149	0.126037	-0.16016	0.181353	0.276678	0.514433	0.0796664
182	3.81302	3.35464	3.35414	4.21665	3.35414	4.21665	3.42646	3.81302	1.03512	4.74791	3.77622	3.81302	5.91654	7.30192	4.91994	6.85206	3.31569	6.00517	0.836802	1.74551	3.16799	1.74551	1.74551		1.14912	0.607113	4.54567	6.26362	2.45761	6.62882	7.84405	6.63053	5.6769	2.68058	0.381915	0.607324	0.588592	1.06195	0.902304	0.864854		0.145707	-0.229987	0.202135	-0.196556	0.15783	0.343636	0.712805	-0.00505836
183	3.84071	3.39958	3.26871	4.29377	3.26871	4.29377	3.31379	3.84071	0.989563	4.62696	3.77751	3.84071	6.16448	7.71878	4.66971	7.29799	3.32024	6.19911	0.829946	2.25233	2.73402	2.25233	2.25233		1.21633	0.604234	4.49422	6.23491	2.50075	6.56132	7.84378	6.23942	5.56886	2.63991	0.33117	0.606363	0.603875	1.04172	0.83648	0.846857		0.175495	-0.23196	0.230752	-0.167826	0.230633	0.180873	0.508849	-0.0425666
184	3.75167	3.35017	3.32634	4.2467	3.32634	4.2467	3.28687	3.75167	0.97089	4.69607	3.77928	3.75167	5.93746	6.30637	4.65745	7.12317	3.34303	5.9533	0.777176	2.10614	2.57808	2.10614	2.10614		1.19843	0.678846	4.67805	6.51796	2.45719	6.47808	7.77127	6.19105	5.56405	2.78898	0.38415	0.606547	0.61473	0.983677	0.800583	0.873978		0.226961	-0.179217	0.185995	-0.1189	0.346783	0.202745	0.46955	-0.0346325
185	3.81716	3.35538	3.27816	4.34182	3.27816	4.34182	3.21098	3.81716	0.89507	4.67909	3.83352	3.81716	6.14094	7.18721	4.67653	7.02764	3.31318	6.0523	0.819016	1.78878	2.83584	1.78878	1.78878		1.22831	0.65579	4.50261	6.08958	2.55463	6.20658	7.71371	6.32873	5.81226	2.69073	0.360585	0.592395	0.632643	1.02929	0.83941	0.875893		0.234202	-0.1731	0.211751	-0.174004	0.236569	0.143593	0.733776	0.072297
186	3.85694	3.38925	3.30067	4.15837	3.30067	4.15837	3.3365	3.85694	0.968956	4.64058	3.79347	3.85694	6.02913	6.96361	4.93396	7.09944	3.32839	6.36851	0.875381	1.13802	2.90061	1.13802	1.13802		1.19954	0.605489	4.59883	6.16437	2.56459	6.15295	7.81716	6.33966	5.33766	2.77436	0.363744	0.594583	0.626473	1.07566	0.860744	0.862933		0.184321	-0.23385	0.0919697	-0.146985	0.267923	0.0807227	0.373859	0.0691
187	4.01346	3.39757	3.29915	4.2589	3.29915	4.2589	3.4709	4.01346	0.950745	4.48787	3.75458	4.01346	6.04202	6.61157	4.65424	6.96561	3.3547	5.95539	0.826366	1.66501	3.01434	1.66501	1.66501		1.14013	0.670654	4.55779	6.30984	2.42253	6.54241	7.64175	6.25209	5.51681	2.70187	0.329518	0.569676	0.645405	1.01683	0.83125	0.896557		0.22197	-0.258481	0.166628	-0.171647	0.226015	0.297862	0.457146	-0.099259
188	3.78473	3.37281	3.28085	4.13535	3.28085	4.13535	3.39369	3.78473	1.00367	4.22754	3.78787	3.78473	5.97646	6.53784	4.94668	6.85885	3.3123	6.14136	0.855129	1.67578	2.65167	1.67578	1.67578		1.16155	0.627144	4.62863	6.11213	2.49527	6.29234	7.79898	6.45154	5.82806	2.80773	0.343044	0.608997	0.573049	1.05331	0.766457	0.86118		0.268365	-0.147623	0.188972	-0.111135	0.265384	0.306868	0.668562	-0.022604
189	3.84853	3.34339	3.31826	4.34442	3.31826	4.34442	3.37043	3.84853	0.973371	4.28613	3.74965	3.84853	6.06102	7.00673	4.59841	7.26139	3.39327	6.23606	0.754888	1.788	2.70481	1.788	1.788		1.16642	0.656331	4.54933	6.1346	2.50401	5.71841	7.74114	6.2038	5.76795	2.81142	0.340206	0.592379	0.645058	1.11547	0.809154	0.95128		0.216994	-0.174166	0.157997	-0.106273	0.233173	0.250175	0.451562	0.0279265
190	3.79115	3.33049	3.32959	4.31605	3.32959	4.31605	3.35648	3.79115	0.927143	4.7004	3.83218	3.79115	5.76204	6.94274	4.74539	7.31226	3.3469	6.05476	0.767058	1.47486	2.80032	1.47486	1.47486		1.17652	0.614204	4.48258	6.14968	2.3697	5.93349	7.19861	6.29385	5.73341	2.77236	0.374732	0.595078	0.600244	1.01841	0.861267	0.940552		0.242711	-0.19779	0.106394	-0.19462	0.32375	0.188936	0.494273	-0.0286471
191	3.78657	3.36747	3.35621	4.29381	3.35621	4.29381	3.53208	3.78657	0.921599	4.39878	3.79734	3.78657	5.86211	6.69336	4.53908	7.13782	3.36334	6.26035	0.819064	1.79016	2.56856	1.79016	1.79016		1.16199	0.662162	4.65687	6.14224	2.46277	6.52916	7.58337	6.61868	5.46906	2.70135	0.392145	0.582529	0.62843	1.02351	0.830154	0.891009		0.158097	-0.114179	0.176861	-0.140684	0.248315	0.348638	0.670394	-0.0426446
192	3.79873	3.42567	3.38905	4.1686	3.38905	4.1686	3.68245	3.79873	1.05672	4.4877	3.80574	3.79873	6.18175	7.25156	4.94912	7.40576	3.33416	6.30355	0.771194	1.47745	3.44979	1.47745	1.47745		1.14624	0.581278	4.63558	6.10888	2.46856	6.6345	8.12807	6.50524	5.56938	2.73141	0.337075	0.614333	0.645637	1.08305	0.777584	0.918662		0.184401	-0.138125	0.152684	-0.0977876	0.316101	0.212379	0.577686	-0.0324683
193	3.79966	3.35718	3.33982	4.27699	3.33982	4.27699	3.25962	3.79966	0.94455	4.63002	3.8307	3.79966	5.79282	6.28188	4.52339	7.41235	3.32718	6.05268	0.717216	1.76577	2.88435	1.76577	1.76577		1.15057	0.61061	4.66109	6.09181	2.6555	6.13182	7.60265	6.74251	5.79474	2.69341	0.347014	0.605096	0.603113	1.04287	0.798968	0.92471		0.221273	-0.185494	0.331921	-0.265725	0.373643	0.244457	0.429227	-0.03824
194	3.73313	3.36108	3.34309	4.25221	3.34309	4.25221	3.26488	3.73313	0.980218	4.25005	3.79157	3.73313	5.9632	6.74724	4.76459	7.17113	3.30721	6.03161	0.729338	2.26353	3.13862	2.26353	2.26353		1.17051	0.658619	4.71838	6.18784	2.52097	5.91676	7.52555	6.49486	5.72226	2.57232	0.339512	0.569645	0.639888	1.05276	0.884351	0.886637		0.146388	-0.211755	0.143137	-0.142322	0.28545	0.289715	0.58344	0.0148058
195	3.73477	3.34822	3.31917	4.34565	3.31917	4.34565	3.71172	3.73477	0.972242	4.27395	3.76447	3.73477	5.68044	6.74345	4.81517	7.15622	3.37841	6.22644	0.691618	1.82205	3.16566	1.82205	1.82205		1.17144	0.669398	4.52024	6.15088	2.38007	6.08736	7.76803	6.19656	5.65612	2.65726	0.360038	0.547086	0.638453	1.02633	0.83653	0.863791		0.206346	-0.226325	0.120656	-0.232629	0.277865	0.134244	0.573341	0.0118428
196	3.66045	3.42449	3.39274	4.3908	3.39274	4.3908	3.5648	3.66045	1.01544	4.31772	3.81004	3.66045	6.08356	6.27084	4.58509	7.18978	3.36783	6.205	0.752883	2.32706	2.77214	2.32706	2.32706		1.17263	0.685145	4.6765	6.14559	2.44207	5.85306	7.22795	6.69524	5.45258	2.63775	0.327346	0.580646	0.641234	1.06172	0.818292	0.922417		0.142902	-0.243269	0.134897	-0.267413	0.269422	0.288056	0.403866	-0.016561
197	3.74709	3.4755	3.37552	4.34565	3.37552	4.34565	3.28222	3.74709	0.980132	4.4952	3.76885	3.74709	6.37676	6.56706	4.82474	7.3148	3.34438	6.06356	0.779085	2.71923	2.8069	2.71923	2.71923		1.15525	0.648922	4.70356	6.10256	2.42822	5.96091	7.4066	6.50432	6.00894	2.61133	0.372532	0.516308	0.658974	1.06003	0.831836	0.895122		0.232792	-0.182878	0.148266	-0.207398	0.254341	0.17427	0.418613	0.0764693
198	3.8494	3.41628	3.39973	4.28565	3.39973	4.28565	3.43183	3.8494	0.841226	4.49347	3.8261	3.8494	5.95727	6.1999	4.68388	6.70662	3.35824	6.0399	0.728097	1.6157	2.51559	1.6157	1.6157		1.15143	0.64511	4.44301	6.34216	2.50591	6.41216	8.08897	6.06512	5.25298	2.51482	0.350974	0.579121	0.638835	0.972809	0.910385	0.857099		0.192307	-0.216445	0.188238	-0.125054	0.213748	0.215153	0.585019	-0.0416711
199	3.69275	3.37861	3.4045	4.20597	3.4045	4.20597	3.37825	3.69275	0.941024	4.69947	3.76064	3.69275	6.01816	6.26157	4.89626	6.97766	3.37898	6.00834	0.748015	3.47885	2.67729	3.47885	3.47885		1.16547	0.687978	4.59712	6.38393	2.27873	6.22802	7.8587	6.10761	5.54431	2.54886	0.324352	0.590121	0.640259	0.969928	0.803111	0.877354		0.275304	-0.175272	0.27448	-0.123714	0.24391	0.210063	0.670905	0.00221263
200	3.71523	3.33671	3.36144	4.31683	3.36144	4.31683	3.20654	3.71523	0.939757	4.4015	3.70928	3.71523	5.76233	6.05393	4.95417	6.70186	3.38501	6.07387	0.754967	2.43635	2.96126	2.43635	2.43635		1.14252	0.699395	4.44436	6.19632	2.24782	5.9956	7.50165	6.43447	5.21897	2.50324	0.350226	0.541118	0.630233	1.01303	0.888299	0.885952		0.165085	-0.196583	0.0654593	-0.117661	0.36477	0.312473	0.763401	0.0215901
201	3.76399	3.38062	3.35409	4.29465	3.35409	4.29465	3.43621	3.76399	1.01635	4.39491	3.74296	3.76399	5.84455	6.55936	4.74245	7.01217	3.31242	6.11214	0.840159	2.51659	2.80973	2.51659	2.51659		1.13286	0.723733	4.65533	6.27486	2.35437	5.95651	7.97573	6.2386	5.55135	2.57293	0.35866	0.585455	0.65239	0.965697	0.869877	0.816537		0.168476	-0.208858	0.106874	-0.19921	0.348282	0.291373	0.445723	0.0660199
202	3.72087	3.39877	3.32375	4.25093	3.32375	4.25093	3.43943	3.72087	0.96543	4.72216	3.8831	3.72087	5.85896	6.5627	4.82408	6.63557	3.33488	6.24466	0.749479	1.98375	2.97801	1.98375	1.98375		1.17205	0.711476	4.63312	6.28569	2.28121	6.01232	7.65234	6.13038	5.42699	2.58792	0.351577	0.557225	0.689905	1.07541	0.92556	0.905891		0.204921	-0.157121	0.0327656	-0.28731	0.239902	0.206261	0.488859	0.00500095
203	3.76559	3.35972	3.29538	3.94359	3.29538	3.94359	3.39867	3.76559	0.983692	4.57545	3.74152	3.76559	5.73569	6.75049	4.67552	6.9918	3.35608	6.03376	0.844645	2.7207	2.47871	2.7207	2.7207		1.11007	0.694792	4.51877	6.12167	2.32366	6.04764	7.80685	6.17434	5.11247	2.68556	0.357966	0.581562	0.632616	1.11395	0.850129	0.877753		0.228245	-0.12098	0.135996	-0.13674	0.317723	0.168236	0.567073	0.0958858
204	3.81693	3.45693	3.3316	4.4031	3.3316	4.4031	3.45952	3.81693	0.986721	4.47326	3.73779	3.81693	6.26785	6.40486	4.66769	7.06139	3.34731	6.1086	0.737085	1.95936	2.36069	1.95936	1.95936		1.15004	0.693487	4.58393	6.25374	2.40636	6.26522	8.04579	6.52745	5.14562	2.5094	0.365797	0.55426	0.613707	1.05025	0.858205	0.843403		0.248844	-0.181591	0.217634	-0.152494	0.27086	0.304668	0.644778	-0.0161319
205	3.60237	3.39352	3.3288	4.31846	3.3288	4.31846	3.32654	3.60237	0.988176	4.70484	3.82362	3.60237	5.81214	6.50631	4.56557	7.11759	3.3299	6.57157	0.72719	1.99495	2.69589	1.99495	1.99495		1.12575	0.693687	4.49045	6.33018	2.40725	6.61652	7.84052	6.10183	5.27272	2.55511	0.381349	0.556195	0.662497	1.02267	0.855615	0.876378		0.148004	-0.231214	0.218069	-0.0908664	0.284135	0.28188	0.668861	0.0146311
206	3.71947	3.37491	3.35053	4.43202	3.35053	4.43202	3.45393	3.71947	0.925945	4.6325	3.76932	3.71947	6.18956	6.53395	4.51451	7.07522	3.34533	6.45941	0.795901	2.62382	2.86939	2.62382	2.62382		1.13374	0.718439	4.74341	6.22584	2.44797	6.25829	7.77725	6.28219	5.22566	2.50848	0.351121	0.531869	0.716613	1.05859	0.814517	0.943643		0.247164	-0.184287	0.210811	-0.156041	0.305915	0.166121	0.731263	0.0192902
207	3.66052	3.40621	3.31111	4.35883	3.31111	4.35883	3.0333	3.66052	0.85627	4.73077	3.78382	3.66052	5.80101	6.29005	4.48632	6.83107	3.32761	6.36687	0.690441	1.95643	2.47969	1.95643	1.95643		1.13183	0.71561	4.61929	6.21532	2.41758	6.08578	7.89482	6.22115	5.45206	2.52865	0.361708	0.589695	0.64944	0.895087	0.866614	0.938212		0.159635	-0.155492	0.179721	-0.273144	0.22271	0.36442	0.707606	0.0204215
208	3.54399	3.3929	3.45315	4.37497	3.45315	4.37497	3.1354	3.54399	0.996203	4.86835	3.8145	3.54399	5.76761	6.22234	4.32696	6.8579	3.34941	6.29014	0.677077	2.33085	2.4835	2.33085	2.33085		1.1688	0.690439	4.58775	6.2928	2.44286	6.02872	7.79599	6.07044	5.11744	2.50105	0.385054	0.556355	0.639301	0.96631	0.931068	0.878902		0.218769	-0.102628	0.0631013	-0.183654	0.257369	0.177814	0.451691	0.0222142
209	3.46313	3.41013	3.35738	4.44977	3.35738	4.44977	3.10235	3.46313	0.966371	4.83186	3.83421	3.46313	5.82556	6.2778	4.24041	6.43399	3.35714	6.10379	0.729688	2.50651	2.81598	2.50651	2.50651		1.1484	0.635881	4.65548	6.18765	2.37312	5.71464	7.6309	6.35222	5.23064	2.63282	0.397767	0.564258	0.619906	0.947121	0.894915	0.815694		0.266068	-0.199339	0.191054	-0.228586	0.249446	0.132072	0.620226	0.0336575
210	3.73129	3.39849	3.36906	4.57499	3.36906	4.57499	3.15609	3.73129	0.884356	4.6922	3.77739	3.73129	5.91405	6.74261	4.28234	6.29748	3.43614	6.18273	0.614667	1.8954	3.10822	1.8954	1.8954		1.14262	0.732666	4.65938	6.17332	2.5236	6.05615	7.40879	6.21079	5.14253	2.62978	0.440362	0.564399	0.635056	0.990661	0.905991	0.849386		0.205982	-0.162836	0.181326	-0.172838	0.120908	0.112802	0.510937	0.00195992
211	3.74111	3.38634	3.34082	4.42085	3.34082	4.42085	3.25119	3.74111	0.89139	4.79127	3.7959	3.74111	5.99042	6.55073	4.21026	6.56681	3.33675	6.32417	0.714782	1.9397	2.51412	1.9397	1.9397		1.11783	0.715219	4.69704	6.22791	2.60382	5.88934	7.41665	6.50092	5.41358	2.59659	0.404503	0.55976	0.652272	1.00564	0.958494	0.935831		0.266385	-0.226384	0.194146	-0.106049	0.332468	0.356072	0.545762	0.118403
212	3.64993	3.42233	3.29703	4.6703	3.29703	4.6703	3.13158	3.64993	0.975032	4.83175	3.75904	3.64993	6.13812	6.69912	4.47097	6.85898	3.35723	6.12852	0.664669	2.20173	2.68273	2.20173	2.20173		1.15818	0.664009	4.79704	6.21568	2.58028	5.59038	7.53314	6.66458	5.22327	2.61766	0.393514	0.590655	0.625577	1.04617	0.901302	0.795179		0.179331	-0.168994	0.227409	-0.131008	0.275723	0.246716	0.723759	-0.0227414
213	3.52124	3.38141	3.32781	4.59579	3.32781	4.59579	3.14607	3.52124	0.893153	5.08296	3.72712	3.52124	5.90758	6.39345	4.41846	6.55844	3.3655	5.89213	0.677826	1.62182	2.81408	1.62182	1.62182		1.12589	0.676239	4.55271	6.04058	2.58328	6.10409	7.42887	6.75838	5.37236	2.57239	0.364674	0.582608	0.616043	1.02382	0.877707	0.801697		0.16423	-0.144806	0.273221	-0.156637	0.0940804	0.132414	0.42147	0.0944814
214	3.58554	3.44437	3.35833	4.7336	3.35833	4.7336	2.97091	3.58554	0.907205	4.92274	3.7809	3.58554	6.25075	6.40699	4.26677	6.92184	3.3681	6.22385	0.776826	2.31835	2.55796	2.31835	2.31835		1.14792	0.699618	4.71941	6.25279	2.38134	5.6134	7.98279	6.43796	5.02486	2.47691	0.358542	0.582471	0.644536	1.01104	1.01763	0.946207		0.238449	-0.242524	0.242497	-0.124135	0.329745	0.202601	0.621078	-0.00160858
215	3.68343	3.46508	3.4074	4.48336	3.4074	4.48336	3.06678	3.68343	0.962503	4.98134	3.81389	3.68343	5.98415	6.07461	4.37126	6.83506	3.34451	6.21936	0.719379	2.36007	2.99395	2.36007	2.36007		1.18367	0.684803	4.79807	6.24778	2.61526	5.92119	8.10634	6.49642	4.98879	2.49908	0.358294	0.589001	0.66181	0.989358	0.771146	0.853461		0.111734	-0.112548	0.176356	-0.234093	0.277957	0.0904441	0.711783	0.0601312
216	3.56219	3.43032	3.39531	4.59732	3.39531	4.59732	3.11943	3.56219	0.978541	5.04035	3.76656	3.56219	6.09883	6.42581	4.43877	6.75806	3.35542	5.99404	0.670205	1.98978	2.49149	1.98978	1.98978		1.15134	0.680078	4.80109	6.21971	2.40878	5.75373	8.05368	6.51579	5.09718	2.42083	0.341593	0.560836	0.629934	0.959433	0.871942	0.887837		0.213445	-0.172515	0.223954	-0.24687	0.304233	0.338889	0.567372	-0.0236183
217	3.62862	3.45744	3.39583	4.59437	3.39583	4.59437	2.98366	3.62862	0.924063	4.83013	3.76612	3.62862	6.22079	6.10039	4.19984	6.68074	3.42216	6.23315	0.742829	2.35921	2.72374	2.35921	2.35921		1.16893	0.649463	4.62318	6.14875	2.48553	6.12079	7.79327	6.46558	4.82784	2.4461	0.340041	0.553055	0.669212	1.03647	0.812985	0.864235		0.209865	-0.126634	0.171595	-0.180057	0.312033	0.203373	0.390866	-0.104152
218	3.85337	3.41582	3.38102	4.5325	3.38102	4.5325	3.26909	3.85337	0.954528	4.8564	3.76614	3.85337	5.73438	6.21678	4.49004	6.68055	3.37588	6.21708	0.69278	1.78326	3.12938	1.78326	1.78326		1.17595	0.664746	4.66387	6.35114	2.49611	6.09146	8.09305	6.13524	4.8756	2.43113	0.343537	0.581644	0.641465	0.968143	0.87877	0.909921		0.21766	-0.135448	0.106966	-0.143611	0.215829	0.169724	0.470402	-0.0325277
219	3.62141	3.47029	3.38434	4.53948	3.38434	4.53948	3.10394	3.62141	0.862312	4.72286	3.76143	3.62141	6.124	6.33799	4.30826	6.45688	3.42216	6.39584	0.64596	1.94893	2.354	1.94893	1.94893		1.15664	0.687437	4.73602	6.27408	2.58987	6.01452	7.99666	6.41538	5.0903	2.49078	0.395541	0.597528	0.659563	0.985914	0.950554	0.878943		0.250031	-0.198273	0.272214	-0.130959	0.269513	0.142248	0.50544	0.109201
220	3.67849	3.44748	3.38222	4.73321	3.38222	4.73321	3.27002	3.67849	0.984753	4.6284	3.78933	3.67849	5.83256	6.09465	4.20959	6.68004	3.36264	6.26446	0.713143	2.34179	2.83866	2.34179	2.34179		1.1226	0.707932	4.78639	6.17768	2.67962	5.57587	7.73326	6.71497	5.19491	2.40572	0.423076	0.589036	0.638623	0.998591	0.89873	0.850693		0.219101	-0.171812	0.111476	-0.219679	0.249325	0.137103	0.480548	-0.0482399
221	3.72174	3.37854	3.3159	4.36198	3.3159	4.36198	2.94558	3.72174	0.98412	4.71743	3.60578	3.72174	5.64507	6.11013	4.34859	6.62067	3.36667	6.1883	0.633504	2.17234	2.60615	2.17234	2.17234		1.15844	0.663859	4.88067	6.1818	2.64459	5.36965	7.11825	6.45035	5.29231	2.43827	0.392082	0.58599	0.656005	0.873859	0.896808	0.832088		0.332998	-0.240773	0.189452	-0.0921812	0.285695	0.236739	0.802017	0.0261134
222	3.80073	3.39507	3.35278	4.5082	3.35278	4.5082	3.04391	3.80073	0.849578	4.39618	3.75134	3.80073	5.83899	6.45725	4.33188	6.74918	3.33593	6.1258	0.603976	2.32257	3.26508	2.32257	2.32257		1.15996	0.661989	4.65544	6.12226	2.73493	5.75121	7.61352	6.71415	4.80191	2.30103	0.331737	0.57231	0.65092	0.949122	0.890426	0.842606		0.291055	-0.21071	0.116672	-0.237096	0.168261	0.168808	0.660635	0.0595868
223	3.57722	3.42979	3.35791	4.38564	3.35791	4.38564	3.22799	3.57722	0.906024	4.42863	3.72262	3.57722	5.6247	5.82857	4.44161	6.62003	3.4108	6.36276	0.738565	2.15605	2.49721	2.15605	2.15605		1.18604	0.685368	4.96601	6.05885	2.77822	5.12526	7.58909	6.68945	4.9546	2.50211	0.361909	0.597033	0.61301	0.93774	0.880547	0.827086		0.180249	-0.151607	0.336866	-0.223722	0.288387	0.323165	0.540562	0.136922
224	3.66483	3.37399	3.40238	4.49851	3.40238	4.49851	3.04205	3.66483	0.938748	4.69699	3.63188	3.66483	5.61741	6.08231	4.56418	6.7774	3.3818	6.3384	0.67905	2.09063	2.23097	2.09063	2.09063		1.1466	0.714355	4.71182	6.24641	2.47099	5.79566	7.82911	6.50487	5.41977	2.34177	0.413913	0.553804	0.640609	0.906934	0.847033	0.841314		0.225076	-0.176057	0.190367	-0.197945	0.207323	0.279651	0.604114	0.0728618
225	3.5496	3.41383	3.33556	4.37516	3.33556	4.37516	3.26942	3.5496	0.896507	4.69295	3.82356	3.5496	5.72001	6.2458	4.49462	6.56865	3.34091	6.36282	0.731009	2.44661	2.69486	2.44661	2.44661		1.13922	0.647816	4.78333	6.23639	2.52087	5.66922	7.83916	6.33598	4.78628	2.40777	0.373473	0.597891	0.648614	1.02553	0.941142	0.838964		0.214633	-0.189117	0.237941	-0.180306	0.167374	0.183791	0.73173	0.0643425
226	3.64449	3.47773	3.3805	4.41849	3.3805	4.41849	3.18602	3.64449	0.896183	4.72326	3.77352	3.64449	6.06437	6.76496	4.50012	7.0756	3.4071	6.39432	0.672321	1.45737	2.59696	1.45737	1.45737		1.14719	0.688101	4.72199	6.17452	2.45129	5.87294	7.94044	6.45457	4.57997	2.3432	0.40527	0.580727	0.653197	1.0878	0.827525	0.823924		0.190453	-0.132893	0.180684	-0.140857	0.247427	0.384375	0.585146	0.0733299
227	3.65618	3.46858	3.33687	4.43384	3.33687	4.43384	3.37289	3.65618	0.869209	4.8553	3.86398	3.65618	5.93308	5.92836	4.3304	6.31657	3.34776	6.17748	0.715036	2.26008	2.66456	2.26008	2.26008		1.14851	0.621927	4.82179	6.21474	2.50227	5.83037	7.69198	6.49854	5.21124	2.28218	0.384224	0.5662	0.663573	0.946619	0.970457	0.87455		0.231762	-0.155551	0.112528	-0.157729	0.241676	0.0905584	0.585061	0.0900768
228	3.54212	3.46238	3.39845	4.52448	3.39845	4.52448	3.20545	3.54212	0.921889	4.84353	3.79562	3.54212	6.10652	6.29505	4.46204	6.55742	3.43495	6.21215	0.75511	2.20363	3.4053	2.20363	2.20363		1.14772	0.659579	4.59418	6.26471	2.53919	5.50147	7.44653	6.44044	4.77837	2.24324	0.396225	0.558944	0.638144	0.944146	0.913849	0.824466		0.117011	-0.141988	0.193437	-0.160905	0.256451	0.34861	0.557611	0.0427229
229	3.67077	3.43222	3.36914	4.48056	3.36914	4.48056	3.29585	3.67077	0.976007	4.98452	3.8864	3.67077	6.17704	6.01721	4.57347	6.76941	3.40039	6.29596	0.738836	1.54503	3.06476	1.54503	1.54503		1.14158	0.605662	4.75441	6.15013	2.59161	6.14633	7.86659	6.56701	4.81581	2.26735	0.364492	0.559721	0.625704	0.999737	0.905863	0.837595		0.237989	-0.194731	0.117841	-0.187773	0.31754	0.227303	0.593331	0.0467968
230	3.667	3.48865	3.39219	4.6586	3.39219	4.6586	3.03653	3.667	0.994166	4.52644	3.73335	3.667	6.29593	6.36043	4.70008	6.39117	3.35338	6.56512	0.799321	3.0909	2.70361	3.0909	3.0909		1.18037	0.672965	4.63637	6.29688	2.55969	6.05205	7.87474	6.16535	4.68029	2.30517	0.409185	0.586571	0.653119	0.997444	0.854485	0.817237		0.231698	-0.171992	0.172876	-0.2169	0.202767	0.344121	0.49555	0.12737
231	3.6336	3.39557	3.3666	4.41859	3.3666	4.41859	3.24818	3.6336	0.949051	4.634	3.77759	3.6336	5.70651	5.54776	4.54969	6.68429	3.43733	6.39072	0.661869	1.828	2.62546	1.828	1.828		1.12319	0.635217	4.61095	6.31065	2.58091	5.72251	8.05502	6.60345	5.05286	2.23536	0.384927	0.545623	0.64902	0.855297	0.936208	0.8428		0.306789	-0.265324	0.180868	-0.155843	0.246112	0.225903	0.484725	0.182853
232	3.62749	3.44082	3.36165	4.52163	3.36165	4.52163	3.29984	3.62749	0.878913	4.71593	3.74835	3.62749	5.97278	6.656	4.19898	6.59199	3.38851	6.18779	0.752263	1.75689	2.51233	1.75689	1.75689		1.16862	0.67235	4.66363	6.23037	2.57907	5.61877	7.51767	6.52405	4.60678	2.17503	0.382563	0.576951	0.648186	1.02858	0.851383	0.833932		0.0798699	-0.145711	0.0204033	-0.241115	0.251006	0.240799	0.723888	0.0528992
233	3.52962	3.43964	3.37699	4.44382	3.37699	4.44382	3.30586	3.52962	0.89466	4.75646	3.81647	3.52962	5.77981	6.16317	4.55389	6.63932	3.44137	6.53855	0.76464	1.62019	2.52103	1.62019	1.62019		1.1826	0.664918	4.74273	6.33978	2.50964	5.58249	7.6518	6.4867	4.69129	2.20493	0.379167	0.602253	0.693436	0.961638	0.936242	0.883152		0.424978	-0.109731	0.166101	-0.197474	0.27034	0.261983	0.521338	0.072141
234	3.60978	3.47723	3.40766	4.30891	3.40766	4.30891	2.96632	3.60978	0.924525	4.61529	3.67882	3.60978	6.1355	5.6009	4.33144	6.51594	3.39181	6.3348	0.688628	2.02297	2.32936	2.02297	2.02297		1.16029	0.672155	4.69843	6.32279	2.5254	5.75752	8.08001	6.32744	4.73251	2.22705	0.436739	0.585678	0.707731	0.991026	0.957086	0.899428		0.311447	-0.159456	0.187071	-0.210524	0.0981482	0.297862	0.540818	0.0898614
235	3.5163	3.4913	3.33299	4.51415	3.33299	4.51415	3.4048	3.5163	0.835955	4.88966	3.77421	3.5163	6.17426	6.20389	4.45541	6.36859	3.35293	6.33575	0.748874	2.17277	2.34894	2.17277	2.17277		1.14603	0.735372	4.72442	6.27861	2.61499	5.64841	7.79164	6.46292	4.94723	2.2741	0.427146	0.594783	0.716818	0.918081	0.848137	0.800491		0.24851	-0.189056	0.212002	-0.198566	0.40827	0.199971	0.749676	-0.00166625
236	3.67174	3.43029	3.36607	4.39931	3.36607	4.39931	3.06503	3.67174	0.837136	4.93123	3.86049	3.67174	6.04808	5.87235	4.40154	6.86126	3.37024	6.27578	0.686161	2.73449	2.51466	2.73449	2.73449		1.14459	0.655985	4.82175	6.22917	2.62605	5.05241	7.55025	6.13093	4.93486	2.29925	0.384699	0.59188	0.68474	0.906859	0.894514	0.832405		0.265068	-0.127641	0.198267	-0.153932	0.290498	0.261039	0.59981	0.133686
237	3.5672	3.44662	3.43606	4.38141	3.43606	4.38141	3.35029	3.5672	0.912511	4.77453	3.85055	3.5672	6.20495	6.30006	4.51486	6.53269	3.38456	6.216	0.721416	2.41549	2.86205	2.41549	2.41549		1.10133	0.63539	4.87837	6.16585	2.69895	5.47591	7.83943	6.2777	4.99533	2.24004	0.429081	0.598457	0.690516	1.01597	0.914913	0.837416		0.280376	-0.175353	0.162345	-0.141701	0.277865	0.379744	0.544482	0.0374397
238	3.53851	3.46882	3.34482	4.43079	3.34482	4.43079	3.21305	3.53851	0.966234	4.86662	3.79976	3.53851	5.97609	6.19035	4.38108	6.17442	3.40319	6.18539	0.730229	1.99487	2.50667	1.99487	1.99487		1.12761	0.686673	4.97368	6.22105	2.59329	5.21102	7.46987	6.42951	5.0343	2.26353	0.419188	0.613421	0.666887	1.08152	0.992493	0.760451		0.19592	-0.131967	0.197809	-0.241413	0.193864	0.187135	0.499942	-0.0071055
239	3.54953	3.42491	3.38306	4.43305	3.38306	4.43305	3.46302	3.54953	0.84749	4.52557	3.77488	3.54953	6.05536	5.8589	4.42159	6.18083	3.38363	5.80149	0.695961	2.68976	1.89696	2.68976	2.68976		1.15034	0.622841	4.70475	6.19887	2.75647	5.58755	7.03244	6.19188	4.67806	2.25088	0.414369	0.600345	0.644189	0.93971	1.00854	0.843219		0.31636	-0.182859	0.207538	-0.103817	0.148377	0.229133	0.439073	0.0582605
240	3.63841	3.457	3.4136	4.47185	3.4136	4.47185	3.4645	3.63841	0.884492	4.78371	3.79534	3.63841	5.97228	6.40754	4.64242	6.50509	3.4537	6.11384	0.699223	1.48185	2.68898	1.48185	1.48185		1.15136	0.597639	4.9937	6.36323	2.72687	5.81206	8.14382	6.54838	5.1908	2.22841	0.396955	0.602397	0.647357	0.878345	1.0009	0.89808		0.228767	-0.193865	0.176814	-0.186235	0.393342	0.251834	0.642518	0.17835
241	3.58971	3.42813	3.36173	4.39739	3.36173	4.39739	3.31128	3.58971	0.974039	4.76939	3.76796	3.58971	5.78103	6.2855	4.57163	6.53161	3.41078	6.1055	0.774774	2.89128	2.45951	2.89128	2.89128		1.14444	0.674761	4.67225	6.27962	2.56585	5.59102	8.03168	6.60703	4.70829	2.13515	0.398206	0.584254	0.666181	0.872541	0.922748	0.788691		0.196998	-0.0821828	0.138008	-0.1483	0.289612	0.292116	0.309881	0.0602686
242	3.70203	3.52042	3.41379	4.29982	3.41379	4.29982	3.20933	3.70203	0.847781	4.44549	3.78524	3.70203	6.39309	6.49527	4.85515	6.50808	3.44816	6.23833	0.704314	2.15157	2.54414	2.15157	2.15157		1.10455	0.698017	4.88484	6.33981	2.83074	5.30406	7.87038	6.4118	4.95152	2.33394	0.410928	0.613483	0.71333	0.929289	0.921439	0.839648		0.291657	-0.162132	0.260606	-0.176634	0.27245	0.214408	0.676063	-0.00802137
243	3.67545	3.3915	3.42601	4.47215	3.42601	4.47215	3.5776	3.67545	0.916806	4.58775	3.92609	3.67545	6.21146	6.64894	4.64984	6.58762	3.39812	6.36409	0.812335	2.86214	2.61828	2.86214	2.86214		1.13614	0.663272	4.71909	6.37859	2.58297	6.0593	7.78621	6.5179	5.07107	2.20911	0.414615	0.611365	0.674569	0.963428	0.886395	0.832987		0.260886	-0.241739	0.14213	-0.214716	0.238771	0.39687	0.494144	0.0926887
244	3.62254	3.40689	3.32831	4.29736	3.32831	4.29736	3.24463	3.62254	0.781597	5.00293	3.90106	3.62254	6.15805	6.47441	4.75123	6.49982	3.37485	6.04869	0.760758	2.82844	2.33746	2.82844	2.82844		1.15121	0.673656	4.81233	6.40724	2.64955	5.67459	7.99367	6.32561	4.69558	2.16469	0.413374	0.581262	0.632968	0.983863	0.900094	0.738178		0.238338	-0.137159	0.2327	-0.112426	0.310199	0.245085	0.636594	0.0441069
245	3.57057	3.42292	3.42041	4.20612	3.42041	4.20612	3.1406	3.57057	0.920623	4.77003	3.80933	3.57057	5.80891	5.98437	4.67501	6.93598	3.41319	6.23321	0.775712	2.14407	2.1539	2.14407	2.14407		1.1142	0.668707	4.75084	6.39582	2.70001	5.79757	7.52662	6.41125	4.60008	2.13804	0.452272	0.584254	0.642084	1.0121	0.980257	0.865599		0.204904	-0.251197	0.221755	-0.282002	0.161836	0.155056	0.764508	0.0933705
246	3.66282	3.42233	3.38353	4.35647	3.38353	4.35647	3.37152	3.66282	0.903679	4.74052	3.84129	3.66282	6.01763	6.371	4.65054	6.22504	3.45715	6.137	0.746345	2.71286	2.81484	2.71286	2.71286		1.11459	0.69617	4.96891	6.22444	2.70875	5.6544	7.68711	6.49064	4.79916	2.33206	0.41301	0.600953	0.705335	1.00517	0.915381	0.803138		0.269854	-0.118827	0.296687	-0.176832	0.310473	0.230648	0.537791	0.00989407
247	3.60892	3.45258	3.39934	4.41569	3.39934	4.41569	3.2686	3.60892	0.987406	4.92823	3.78343	3.60892	6.24134	6.37045	4.71821	6.77524	3.39742	6.13719	0.804221	2.33024	3.04099	2.33024	2.33024		1.06996	0.688592	4.80534	6.35293	2.84749	5.59543	7.60537	6.19179	4.76291	2.54404	0.440855	0.62604	0.662995	0.934716	0.84895	0.78113		0.304968	-0.196361	0.255454	-0.170009	0.237577	0.085612	0.564857	0.103645
248	3.68954	3.42517	3.38835	4.34964	3.38835	4.34964	3.51894	3.68954	0.919579	4.41171	3.82906	3.68954	6.00629	6.76978	4.8494	6.69672	3.43126	6.29406	0.727031	2.05899	2.07911	2.05899	2.05899		1.06439	0.745829	4.85568	6.2975	2.7927	5.30373	8.08327	6.3659	4.87868	2.48135	0.432303	0.580443	0.671802	0.956482	1.00032	0.785416		0.290167	-0.12102	0.26459	-0.197077	0.237211	0.196855	0.752615	0.129573
249	3.62715	3.46175	3.37348	4.26952	3.37348	4.26952	3.28737	3.62715	0.91441	4.81835	3.68998	3.62715	6.36841	6.12079	4.41335	6.38229	3.3746	6.2093	0.687402	2.05046	2.76551	2.05046	2.05046		1.13611	0.691717	4.7968	6.27539	2.78802	5.43934	7.94288	6.66008	5.08688	2.57572	0.455302	0.601137	0.679279	0.955981	0.893317	0.85219		0.22517	-0.2191	0.295038	-0.277238	0.299247	0.140162	0.521124	0.0485319
250	3.64629	3.44371	3.34409	4.34324	3.34409	4.34324	3.35609	3.64629	0.837752	4.73614	3.75955	3.64629	6.3813	6.51197	4.56128	6.71074	3.48088	6.11163	0.746567	1.70802	2.28334	1.70802	1.70802		1.13557	0.66797	4.95675	6.25659	2.86487	5.32422	7.76477	6.59344	4.81531	2.58096	0.440818	0.577115	0.645791	0.988733	0.914428	0.906013		0.234884	-0.201392	0.231943	-0.10739	0.26624	0.180188	0.549684	0.0340289
251	3.58587	3.44868	3.35511	4.47013	3.35511	4.47013	3.11658	3.58587	0.880334	4.64179	3.82626	3.58587	6.29114	6.13999	4.61695	6.80176	3.43711	5.9979	0.744261	1.86799	2.52886	1.86799	1.86799		1.10868	0.673041	4.76713	6.15124	2.85565	5.47529	7.50165	6.75306	4.73526	2.48484	0.508658	0.644164	0.654942	0.966216	0.905094	0.85551		0.183989	-0.0819407	0.161887	-0.261433	0.160093	0.252663	0.642689	0.0463694
252	3.56346	3.43824	3.37034	4.39941	3.37034	4.39941	3.27095	3.56346	0.803949	5.04347	3.86872	3.56346	6.47507	6.40105	4.58689	6.96174	3.49902	6.06919	0.689741	1.82334	2.63215	1.82334	1.82334		1.14626	0.668684	4.78393	6.45218	2.56527	5.81807	7.69987	6.42116	4.61501	2.45482	0.494593	0.594837	0.679825	1.00015	0.919646	0.769677		0.200404	-0.14877	0.205364	-0.153213	0.379453	0.262869	0.505353	0.118871
253	3.6527	3.41539	3.44998	4.44692	3.44998	4.44692	3.21196	3.6527	0.799345	5.11275	3.90402	3.6527	6.12588	5.92196	4.63059	6.84223	3.43171	6.30887	0.791574	2.19863	2.55584	2.19863	2.19863		1.1085	0.6441	4.89513	6.28208	2.81509	5.41347	7.45196	6.39454	4.71825	2.39592	0.491481	0.620968	0.670566	0.989	0.933318	0.811261		0.281659	-0.155069	0.215758	-0.143885	0.320598	0.232535	0.686847	0.145188
254	3.60331	3.4232	3.36741	4.49585	3.36741	4.49585	3.35932	3.60331	0.817162	4.81997	3.85072	3.60331	6.37983	6.41867	4.90311	6.67388	3.45847	6.45973	0.773278	2.37679	2.69426	2.37679	2.37679		1.1002	0.705671	4.93677	6.30749	2.75694	5.55097	7.69634	6.66871	4.7782	2.61519	0.451041	0.612227	0.662198	0.987432	0.90421	0.888542		0.324663	-0.171308	0.134232	-0.113046	0.186951	0.237139	0.758029	0.139788
255	3.53159	3.45089	3.34461	4.33149	3.34461	4.33149	3.28944	3.53159	0.874788	4.91281	3.95164	3.53159	6.33149	6.39484	4.64877	6.26304	3.41185	6.12978	0.770829	2.15769	2.2586	2.15769	2.15769		1.12632	0.681848	4.82227	6.27755	2.88114	5.34694	7.36562	6.67247	4.84244	2.48359	0.485001	0.622556	0.67332	0.924238	1.04299	0.80818		0.244629	-0.159093	0.146754	-0.200574	0.317784	0.258924	0.569929	0.0513982
256	3.59212	3.48601	3.37097	4.45577	3.37097	4.45577	3.10974	3.59212	0.901762	4.825	3.76527	3.59212	6.70209	6.46031	4.59383	6.63348	3.41012	6.15686	0.823916	2.56193	2.09412	2.56193	2.56193		1.06973	0.596534	4.71536	6.38754	2.60477	5.63013	7.86605	6.37141	4.65556	2.40751	0.426408	0.613163	0.693245	0.969185	0.981973	0.840262		0.186636	-0.173863	0.204058	-0.293512	0.299339	0.162346	0.555864	0.0127197
257	3.71326	3.48215	3.34945	4.50372	3.34945	4.50372	3.25519	3.71326	0.809409	4.72811	3.8408	3.71326	6.147	5.79509	4.65348	6.87547	3.41056	6.41127	0.808962	1.96608	2.51358	1.96608	1.96608		1.08857	0.654016	4.78901	6.3437	2.75837	5.85906	7.74005	6.53213	4.53136	2.4064	0.514946	0.623056	0.695493	0.941774	0.980503	0.823188		0.1828	-0.0995087	0.182423	-0.250393	0.224058	0.193567	0.603689	0.0641288
258	3.59693	3.44084	3.42988	4.30832	3.42988	4.30832	3.04003	3.59693	0.832754	5.04439	3.8514	3.59693	6.14917	5.87634	4.46264	6.51124	3.40926	6.11074	0.748524	3.01272	2.5541	3.01272	3.01272		1.12901	0.724789	4.91814	6.39815	2.75336	5.60016	7.85138	6.61777	4.58324	2.28712	0.5031	0.613799	0.706006	0.82247	1.01208	0.844425		0.191705	-0.12271	0.15582	-0.179759	0.198299	0.262211	0.664555	0.0110626
259	3.59499	3.47635	3.35241	4.48808	3.35241	4.48808	3.3701	3.59499	0.85473	5.1907	3.81401	3.59499	6.55418	6.33168	4.85395	6.78102	3.50922	6.23441	0.823741	1.84489	2.65091	1.84489	1.84489		1.09333	0.675598	4.88393	6.42683	2.93023	5.45668	7.66619	6.65503	4.65401	2.42655	0.492695	0.627565	0.642903	0.937262	1.03836	0.793978		0.225122	-0.111261	0.287185	-0.22149	0.300899	0.414766	0.47782	0.0642459
260	3.58073	3.49159	3.33933	4.45695	3.33933	4.45695	3.28824	3.58073	0.857434	4.82084	3.92108	3.58073	6.47863	6.6303	4.69364	6.81883	3.41568	6.34656	0.808532	2.99419	2.43955	2.99419	2.99419		1.10682	0.571827	4.67841	6.38986	2.78591	5.49136	7.43702	6.59987	4.6449	2.33855	0.503418	0.613822	0.677736	0.93564	0.930227	0.783388		0.215124	-0.0745765	0.21095	-0.189907	0.218092	0.316446	0.673591	0.188136
261	3.60484	3.46556	3.40868	4.32539	3.40868	4.32539	3.21114	3.60484	0.812096	4.81252	3.99623	3.60484	6.44523	6.56409	4.65935	6.98559	3.45318	6.37781	0.829882	2.29284	2.7536	2.29284	2.29284		1.09787	0.645724	5.15413	6.34999	2.89642	5.82752	7.24913	6.72764	4.99823	2.33643	0.468737	0.618726	0.664812	0.923409	0.960928	0.810157		0.192545	-0.0515144	0.12583	-0.132571	0.294168	0.251062	0.632034	0.218509
262	3.62147	3.49369	3.37343	4.45631	3.37343	4.45631	3.33738	3.62147	0.83248	5.0135	3.92357	3.62147	6.57186	6.53756	4.72885	7.28777	3.45491	6.26345	0.741365	1.91936	2.39142	1.91936	1.91936		1.11477	0.578076	4.85179	6.29207	2.93055	5.84865	7.81553	6.75664	4.6066	2.39301	0.498453	0.618226	0.688869	0.939866	0.933507	0.810627		0.247433	-0.162031	0.311591	-0.18425	0.177193	0.32325	0.593757	0.143804
263	3.51256	3.5123	3.34048	4.40723	3.34048	4.40723	3.33185	3.51256	0.86998	5.10952	3.87742	3.51256	6.30633	6.63169	4.76686	6.40772	3.39923	6.22632	0.827273	2.39282	2.84035	2.39282	2.39282		1.09559	0.620626	4.88758	6.3918	2.86597	5.56454	8.12671	6.45714	4.66088	2.32856	0.477654	0.617809	0.715222	0.885565	0.916444	0.909406		0.310877	-0.11609	0.218549	-0.0871945	0.233845	0.187821	0.730027	0.117214
264	3.51149	3.45499	3.39955	4.57868	3.39955	4.57868	3.28217	3.51149	0.870099	4.75848	3.83707	3.51149	6.56683	6.50557	4.59288	6.74569	3.40253	6.12909	0.842084	2.87386	2.44972	2.87386	2.87386		1.08323	0.630764	4.81381	6.34428	2.76542	5.62254	7.52908	6.76526	4.996	2.37166	0.4894	0.605556	0.67853	0.874814	1.04804	0.827644		0.289471	-0.172395	0.079493	-0.137582	0.306833	0.163948	0.670097	0.132458
265	3.54151	3.54984	3.35432	4.42282	3.35432	4.42282	3.07713	3.54151	0.864554	4.97545	3.95703	3.54151	6.94928	6.90287	4.83424	6.7958	3.44032	6.11068	0.782617	1.39384	2.09026	1.39384	1.39384		1.08504	0.607754	5.02294	6.21479	2.83695	5.4964	7.43077	6.66981	4.98123	2.37267	0.510592	0.664433	0.669199	0.890353	0.932432	0.828364		0.310735	-0.0659027	0.183408	-0.156165	0.350821	0.210721	0.777679	0.153435
266	3.52318	3.52289	3.43651	4.54774	3.43651	4.54774	3.32764	3.52318	0.814715	4.97101	3.83727	3.52318	6.61066	6.5766	4.6847	7.13916	3.39683	6.3193	0.852727	3.1171	2.28563	3.1171	3.1171		1.13654	0.681874	4.89716	6.38447	2.86434	5.84139	7.92687	6.53974	5.16005	2.24961	0.464265	0.645576	0.669915	0.957462	1.00832	0.76603		0.274005	-0.148789	0.0940293	-0.214617	0.348037	0.332857	0.534978	0.0956704
267	3.66075	3.42068	3.43297	4.49217	3.43297	4.49217	3.52611	3.66075	0.863339	5.54359	3.80377	3.66075	6.33727	6.93745	4.68171	7.25295	3.43861	6.21651	0.792416	2.33964	2.65271	2.33964	2.33964		1.08888	0.72437	4.69847	6.33337	2.82173	5.83951	7.25565	6.65787	4.77683	2.30449	0.507234	0.631806	0.668585	0.927659	0.977451	0.873671		0.213049	-0.108081	0.115	-0.151253	0.401845	0.181045	0.651939	0.0736216
268	3.47649	3.54229	3.40772	4.61389	3.40772	4.61389	3.26219	3.47649	0.86404	5.06327	3.91783	3.47649	6.37373	7.2039	4.74637	6.69761	3.40963	6.10847	0.820909	2.7688	2.46327	2.7688	2.7688		1.12516	0.703652	4.86541	6.49227	3.11495	5.75215	7.39032	6.9169	4.72563	2.29711	0.490896	0.59928	0.68228	0.919437	1.026	0.742438		0.227864	-0.182376	0.275052	-0.245953	0.268595	0.252376	0.674956	0.101695
269	3.55695	3.5137	3.41169	4.47303	3.41169	4.47303	3.23489	3.55695	0.792738	4.61899	3.91958	3.55695	6.75542	7.12312	4.55727	6.84198	3.45685	6.11309	0.81671	3.41042	2.50439	3.41042	3.41042		1.15139	0.689157	4.88675	6.25953	3.01272	5.305	7.49594	6.78289	4.8804	2.35505	0.482108	0.607624	0.690209	0.973615	0.887052	0.815618		0.307804	-0.173422	0.247626	-0.171424	0.271013	0.265556	0.773844	0.145696
270	3.51747	3.50735	3.39049	4.55379	3.39049	4.55379	3.02739	3.51747	0.831795	5.38787	3.91266	3.51747	6.43033	6.5332	4.65067	6.92869	3.51867	6.37313	0.752502	1.94436	2.27372	1.94436	1.94436		1.13468	0.622718	4.90491	6.21585	3.03137	5.41568	7.61433	6.78922	4.56452	2.34083	0.515576	0.624324	0.675527	0.943291	0.979028	0.824711		0.292845	-0.073429	0.182836	-0.173482	0.27869	0.209807	0.645331	0.10111
271	3.50003	3.49297	3.42468	4.47658	3.42468	4.47658	3.03964	3.50003	0.759689	5.44537	3.9565	3.50003	6.56297	6.46588	4.69658	7.04629	3.48399	6.18393	0.845346	2.08873	2.4792	2.08873	2.08873		1.09026	0.589593	4.82771	6.52577	2.90922	5.71179	7.32787	6.69432	4.85429	2.32205	0.518277	0.648388	0.684115	0.857168	0.931926	0.817733		0.280486	-0.0937132	0.318872	-0.167852	0.248468	0.226503	0.603263	0.133511
272	3.54529	3.48743	3.36976	4.41874	3.36976	4.41874	3.271	3.54529	0.78134	5.29907	3.92205	3.54529	6.64487	6.51438	4.70649	7.03678	3.43445	6.45442	0.8526	2.77095	2.21384	2.77095	2.77095		1.11723	0.574192	4.73041	6.37806	2.92981	5.63107	7.22686	6.8655	4.33521	2.24051	0.571167	0.628868	0.671516	0.953522	0.936526	0.815567		0.341078	-0.121242	0.212094	-0.148151	0.300837	0.334344	0.920982	0.121189
273	3.4168	3.52215	3.36359	4.52522	3.36359	4.52522	3.34187	3.4168	0.815639	4.91004	3.87639	3.4168	6.71088	6.85965	4.63668	7.05111	3.50155	6.60085	0.785576	3.3156	2.43009	3.3156	3.3156		1.12384	0.573032	4.97121	6.44692	3.02557	5.33054	7.57252	6.51295	4.54339	2.26212	0.519975	0.653526	0.680436	0.95693	0.989859	0.825672		0.233902	-0.0876962	0.112689	-0.231315	0.334854	0.363735	0.717367	0.165638
274	3.53286	3.50157	3.42326	4.28865	3.42326	4.28865	3.04178	3.53286	0.880898	5.22753	3.92304	3.53286	6.63554	6.98595	4.85944	7.0664	3.46357	6.03598	0.73042	3.57832	2.68523	3.57832	3.57832		1.12936	0.576357	4.8562	6.36409	2.99839	5.40527	7.5861	6.57389	4.58976	2.33171	0.481524	0.653303	0.66925	0.941879	0.931051	0.716231		0.215679	-0.102045	0.370634	-0.169909	0.336995	0.255492	0.77491	0.184549
275	3.47568	3.57144	3.37461	4.52212	3.37461	4.52212	3.33869	3.47568	0.804788	5.1265	4.00407	3.47568	7.12441	6.29904	4.66475	7.00627	3.44591	6.08519	0.845361	2.28499	2.63432	2.28499	2.28499		1.1013	0.630469	4.86891	6.43788	3.09494	5.53363	7.59179	6.66081	4.90256	2.19957	0.500307	0.638398	0.67922	0.929035	0.895026	0.788829		0.28055	-0.0842357	0.206371	-0.132297	0.352964	0.34458	0.570781	0.175192
276	3.42361	3.37835	3.4592	4.36602	3.4592	4.36602	3.14312	3.42361	0.869876	5.1486	3.91877	3.42361	6.59338	6.76691	4.69367	7.25041	3.42859	6.25244	0.876733	2.21147	2.5647	2.21147	2.21147		1.1135	0.62476	4.86267	6.38995	2.94693	5.86946	7.361	6.36847	4.61708	2.19175	0.555714	0.626965	0.692392	0.896041	0.939962	0.803102		0.265163	-0.12766	0.216855	-0.170878	0.257095	0.201945	0.553221	0.162461
277	3.50251	3.46889	3.40533	4.51469	3.40533	4.51469	3.23751	3.50251	0.875764	4.88769	3.95954	3.50251	6.78881	6.78305	4.79771	6.76947	3.50192	6.14415	0.841973	2.61494	2.69557	2.61494	2.61494		1.13231	0.559842	4.91659	6.32204	2.95983	5.27913	7.03868	6.79318	4.61398	2.23539	0.551973	0.641222	0.648746	0.940899	0.993128	0.791311		0.298502	-0.0434858	0.213629	-0.159118	0.368104	0.250146	0.639577	0.246328
278	3.4508	3.53121	3.42839	4.47466	3.42839	4.47466	3.04495	3.4508	0.895259	5.02459	3.89486	3.4508	6.37713	6.59441	4.48202	5.93186	3.46438	6.17014	0.775219	2.9916	2.35878	2.9916	2.9916		1.11143	0.541289	5.00391	6.3799	3.04453	5.70769	7.13453	6.58986	4.80242	2.368	0.605136	0.631135	0.62885	0.903315	0.955148	0.811301		0.289977	-0.172515	0.203692	-0.192809	0.354583	0.213437	0.591625	0.131912
279	3.48534	3.50781	3.4632	4.33144	3.4632	4.33144	2.97081	3.48534	0.903576	5.15426	3.88853	3.48534	6.24506	6.27483	4.42866	6.61109	3.44818	5.65594	0.807021	2.89886	2.51744	2.89886	2.89886		1.16386	0.602488	4.96518	6.41488	3.04164	5.68436	7.36886	6.86458	4.54132	2.28834	0.553761	0.663765	0.641769	0.877099	0.992588	0.876282		0.148447	-0.0975163	0.355205	-0.0949596	0.253516	0.389093	0.598019	0.126844
280	3.40307	3.5156	3.43475	4.51474	3.43475	4.51474	3.19106	3.40307	0.782641	5.12361	3.94681	3.40307	6.41805	6.56409	4.58868	6.27864	3.41179	5.85279	0.823137	2.39006	3.03871	2.39006	2.39006		1.17256	0.609355	5.06557	6.19493	3.13745	5.56609	7.28986	6.66164	4.74607	2.3012	0.527897	0.636338	0.672768	0.895689	0.945904	0.75287		0.241555	-0.0868707	0.213925	-0.173136	0.319712	0.242257	0.718304	0.227691
281	3.58827	3.52812	3.44922	4.6073	3.44922	4.6073	3.19554	3.58827	0.886513	5.31523	4.03743	3.58827	6.5153	6.39224	4.82884	6.95482	3.45802	6.16742	0.780103	2.92041	2.19719	2.92041	2.92041		1.1055	0.642822	5.10808	6.37979	2.96126	5.45541	7.84026	6.83292	4.92163	2.17369	0.628938	0.660157	0.670518	0.975046	0.942284	0.761396		0.168619	-0.0818608	0.166101	-0.201716	0.255289	0.454849	0.715491	0.141893
282	3.55281	3.51919	3.44954	4.47967	3.44954	4.47967	3.35916	3.55281	0.870133	4.99612	3.90106	3.55281	6.4808	7.26102	4.68698	6.82663	3.42747	6.23467	0.835244	2.39894	2.70867	2.39894	2.39894		1.09699	0.563658	4.78719	6.4221	3.04448	5.84076	7.60781	6.79638	4.85309	2.25276	0.516825	0.641948	0.645368	0.878854	0.945596	0.795782		0.280898	-0.08349	0.312758	-0.137111	0.338952	0.190537	0.717664	0.256952
283	3.60214	3.46527	3.36942	4.62909	3.36942	4.62909	3.25842	3.60214	0.820431	5.14965	3.88975	3.60214	6.45219	6.38779	4.74801	7.10408	3.47014	6.23757	0.846793	2.82275	2.68839	2.82275	2.82275		1.05006	0.611593	5.04479	6.36812	3.03147	5.64556	7.566	6.51423	4.64285	2.14659	0.591546	0.637037	0.652929	0.92067	0.836759	0.752073		0.242489	-0.12094	0.149457	-0.139022	0.278416	0.260438	0.743452	0.158697
284	3.47752	3.50045	3.49259	4.49581	3.49259	4.49581	3.13732	3.47752	0.78656	4.92303	3.90155	3.47752	6.33559	6.07415	4.61805	6.38648	3.44365	6.3916	0.770669	2.13855	2.29254	2.13855	2.13855		1.08912	0.609919	4.84619	6.32556	2.8251	5.24761	7.55921	6.64897	4.68733	2.27899	0.554666	0.646964	0.672523	0.953355	0.993645	0.820374		0.310403	-0.141264	0.238948	-0.101335	0.208762	0.243285	0.596399	0.116959
285	3.60611	3.44349	3.31792	4.70237	3.31792	4.70237	2.96911	3.60611	0.741359	5.09462	3.95419	3.60611	6.16501	6.30571	4.60498	6.7899	3.47483	6.11777	0.805605	2.62028	2.76317	2.62028	2.62028		1.0898	0.600027	5.02386	6.40444	3.0862	5.54119	7.28388	6.70303	4.61278	2.16899	0.550083	0.631724	0.65587	0.943719	0.929903	0.705688		0.272675	-0.0864895	0.307447	-0.204346	0.376395	0.254491	0.67163	0.2991
286	3.42101	3.49448	3.30682	4.44623	3.30682	4.44623	3.25661	3.42101	0.905562	5.17528	3.88004	3.42101	6.25468	6.58096	4.67555	6.65358	3.43046	6.01555	0.756924	2.35696	2.32936	2.35696	2.35696		1.11469	0.504256	5.03526	6.44725	3.2892	5.64935	7.25755	6.37692	4.60574	2.26888	0.566274	0.672425	0.692992	0.964253	1.01001	0.779873		0.296553	-0.170382	0.129952	-0.0937938	0.232805	0.252606	0.741236	0.134661
287	3.47254	3.49621	3.48173	4.61001	3.48173	4.61001	3.06536	3.47254	0.857503	5.4687	3.97717	3.47254	6.20438	6.17894	4.67084	6.89406	3.49651	6.41355	0.808262	3.19511	2.72738	3.19511	3.19511		1.12447	0.579405	4.87487	6.45179	3.1878	6.33934	7.6958	6.5816	4.65486	2.1841	0.630299	0.634462	0.654748	0.968014	0.889301	0.789647		0.296205	-0.0177075	0.227158	-0.173383	0.38086	0.238281	0.739574	0.249584
288	3.53828	3.45617	3.35895	4.43595	3.35895	4.43595	3.10164	3.53828	0.817984	4.96489	3.98148	3.53828	6.34083	6.49703	4.43829	6.34061	3.46526	6.20051	0.832094	3.42671	2.99977	3.42671	3.42671		1.10104	0.557654	4.93979	6.34521	3.22146	5.29743	7.8788	6.33873	4.98656	2.28743	0.60185	0.668587	0.669019	0.920875	0.95433	0.74793		0.284987	-0.0460809	0.166285	-0.143016	0.253546	0.289429	0.884197	0.250968
289	3.59282	3.50811	3.4046	4.56476	3.4046	4.56476	3.35007	3.59282	0.854251	5.07118	3.96206	3.59282	6.42583	6.6125	4.58338	6.7925	3.46127	6.03351	0.765276	2.04753	2.05039	2.04753	2.04753		1.1085	0.625079	5.02775	6.49854	3.1305	5.5169	7.46445	6.45457	4.71121	2.1413	0.573201	0.615433	0.672332	0.915248	0.900294	0.766116		0.312715	-0.140318	0.258247	-0.171027	0.336933	0.202859	0.598786	0.274089
290	3.47842	3.50612	3.41782	4.61709	3.41782	4.61709	3.13158	3.47842	0.870954	5.02187	3.99452	3.47842	6.66382	6.34597	4.45856	6.52463	3.5085	6.15186	0.826048	1.40238	2.37407	1.40238	1.40238		1.10327	0.53408	4.95071	6.39845	3.02157	5.55349	7.18422	6.73984	4.71567	2.15054	0.581415	0.670709	0.657445	0.966056	0.960662	0.725514		0.32368	-0.0984423	0.208294	-0.186434	0.111792	0.262783	0.730749	0.175327
291	3.48634	3.47307	3.43441	4.50013	3.43441	4.50013	3.1116	3.48634	0.820071	5.06795	3.93908	3.48634	6.345	6.02732	4.3405	6.80512	3.43612	6.01384	0.825889	3.69632	2.19871	3.69632	3.69632		1.13992	0.519411	4.93764	6.38592	3.16763	5.15016	7.49431	6.76077	4.52054	2.28639	0.583752	0.664662	0.65298	0.894015	0.971592	0.773545		0.282578	-0.130901	0.364338	-0.0266075	0.286674	0.231249	0.62372	0.247381
292	3.56293	3.46151	3.39243	4.57671	3.39243	4.57671	3.21634	3.56293	0.814184	5.18186	3.88162	3.56293	6.12793	6.71368	4.44236	6.71791	3.45847	5.96178	0.763685	3.07357	2.55861	3.07357	3.07357		1.15227	0.446278	5.20943	6.34711	3.30041	5.51848	6.86463	6.93626	4.80913	2.27142	0.582876	0.646352	0.653222	0.929915	0.923656	0.754076		0.235264	-0.173984	0.224847	-0.151625	0.181047	0.204833	0.627173	0.184606
293	3.47872	3.5242	3.34736	4.53682	3.34736	4.53682	2.84424	3.47872	0.832361	5.01489	4.01259	3.47872	6.29745	6.3876	4.3519	6.81235	3.45367	6.18184	0.790301	3.21855	2.41214	3.21855	3.21855		1.11773	0.563508	5.10145	6.31857	3.14482	4.99471	6.86789	6.82108	4.60935	2.20246	0.606578	0.64966	0.670224	0.879529	0.911142	0.728891		0.317785	-0.0974365	0.167175	-0.0840429	0.269239	0.167864	0.69827	0.117271
294	3.51523	3.48872	3.42352	4.48592	3.42352	4.48592	2.9933	3.51523	0.860343	5.30658	3.87805	3.51523	6.28922	5.89645	4.48928	6.72444	3.47794	6.24168	0.826827	3.11184	2.4668	3.11184	3.11184		1.11058	0.50588	5.16958	6.37828	3.19749	5.55947	6.84319	6.64503	5.01078	2.26677	0.641945	0.674879	0.67578	0.891909	0.923261	0.745156		0.387267	-0.142452	0.243092	-0.194372	0.21647	0.268101	0.606032	0.214024
295	3.47532	3.53655	3.38288	4.68442	3.38288	4.68442	3.41995	3.47532	0.836896	5.31368	3.93519	3.47532	6.34099	6.36683	4.44811	7.03817	3.52433	6.16945	0.780278	2.05744	2.42378	2.05744	2.05744		1.09778	0.513826	5.19934	6.47154	3.23921	5.70043	7.49431	6.56499	4.8105	2.17581	0.653663	0.654704	0.681467	0.953985	0.964141	0.771347		0.177666	-0.0418952	0.161223	-0.207398	0.276824	0.105654	0.589878	0.227983
296	3.48851	3.42937	3.46519	4.40851	3.46519	4.40851	3.29103	3.48851	0.843279	5.24601	3.93316	3.48851	6.23667	6.50724	4.51366	6.77169	3.51985	6.01396	0.842291	3.19735	2.21411	3.19735	3.19735		1.09211	0.524728	5.17161	6.39683	3.24606	5.95587	7.26351	6.72736	4.68715	2.11921	0.622103	0.674953	0.622266	0.949705	0.913726	0.755894		0.249635	-0.00708249	0.250305	-0.122101	0.229165	0.264041	0.799374	0.158445
297	3.40614	3.5226	3.43017	4.55473	3.43017	4.55473	3.04413	3.40614	0.82969	4.91633	3.91822	3.40614	6.24301	6.51669	4.24524	6.65523	3.47376	6.07501	0.765674	2.77328	2.80886	2.77328	2.77328		1.05568	0.476716	5.20764	6.41052	3.31347	5.81616	7.12667	6.61263	4.99171	2.36252	0.676754	0.652776	0.685405	0.927721	0.937785	0.767501		0.237688	-0.118505	0.286568	-0.187997	0.37303	0.181874	0.794601	0.266914
298	3.68347	3.48171	3.38848	4.59599	3.38848	4.59599	3.12331	3.68347	0.834637	5.07095	3.96873	3.68347	6.09952	6.39818	4.41411	6.25428	3.42768	6.21537	0.803187	2.00892	2.63427	2.00892	2.00892		1.11148	0.57542	5.11746	6.38016	3.25612	5.88901	7.26161	6.42584	4.81925	2.1418	0.619766	0.662977	0.656258	0.880792	0.886896	0.709156		0.253137	-0.126514	0.24355	-0.165121	0.238067	0.237996	0.702107	0.165989
299	3.42031	3.52663	3.43219	4.6132	3.43219	4.6132	3.05425	3.42031	0.856681	4.79866	3.87146	3.42031	6.40684	6.11607	4.39494	7.04242	3.43884	6.1857	0.862479	2.0159	2.0046	2.0159	2.0159		1.09762	0.522882	5.15011	6.38041	3.22404	5.85211	7.31184	6.66421	4.50439	2.16173	0.634679	0.646933	0.665555	0.872509	0.939487	0.827526		0.237562	-0.134261	0.308776	-0.103394	0.414509	0.339348	0.624233	0.246172
[truncated: 109 more columns]

## Sheet: Panel F
Genotype	Treatment	Peak
WT	Baseline	0.0729355
WT	Baseline	0.130721
WT	Baseline	0.0439458
WT	Baseline	0.0420545
WT	Baseline	0.0801896
WT	Baseline	0.0472181
WT	Baseline	0.0569066
WT	Baseline	0.0473509
WT	Baseline	0.0558831
WT	Baseline	0.0390163
WT	Baseline	0.214678
WT	Baseline	0.0268663
WT	Baseline	0.118779
WT	Baseline	0.0710376
WT	Baseline	0.133086
WT	Baseline	0.0974425
WT	Baseline	0.0476078
WT	Baseline	0.144216
WT	Baseline	0.0650534
WT	Baseline	0.053739
WT	Baseline	0.0683814
WT	Baseline	0.277784
WT	Baseline	0.658344
WT	Baseline	0.0920777
WT	Baseline	0.189862
WT	Baseline	0.0657984
WT	Baseline	0.100407
WT	Baseline	0.131127
WT	Baseline	0.133959
WT	Baseline	0.0849934
WT	Baseline	0.0354205
WT	Baseline	0.0929499
WT	Baseline	0.138282
WT	Baseline	0.166894
WT	Baseline	0.138282
WT	Baseline	0.166894
WT	Baseline	0.171297
WT	Baseline	0.133959
WT	Baseline	0.0454985
WT	Baseline	0.0586379
WT	Baseline	0.157563
WT	Baseline	0.186617
WT	Baseline	0.133959
WT	Baseline	0.111115
WT	Baseline	0.199487
WT	Baseline	0.124235
WT	Baseline	0.034906
WT	Baseline	0.168723
WT	Baseline	0.095274
WT	Baseline	0.168721
WT	Baseline	0.187579
WT	Baseline	0.100179
WT	Baseline	0.0975187
WT	Baseline	0.0444656
WT	Baseline	0.141626
WT	Baseline	0.0646112
WT	Baseline	0.110501
WT	Baseline	0.0956262
WT	Baseline	0.165676
WT	Baseline	0.147412
WT	Baseline	1.03539
WT	Baseline	0.819255
WT	Baseline	0.554535
WT	Baseline	0.654519
WT	Baseline	0.358179
WT	Baseline	0.664456
WT	Baseline	0.664456
WT	Baseline	0.37232
WT	Baseline	0.383807
WT	Baseline	0.385747
WT	Baseline	0.929618
WT	Baseline	0.441925
WT	Baseline	0.607807
WT	Baseline	0.223765
WT	Baseline	0.31861
WT	Baseline	0.37829
WT	Baseline	0.532286
WT	Baseline	0.302963
WT	Baseline	0.230098
WT	Baseline	0.43441
WT	Baseline	0.284021
WT	Baseline	0.156114
WT	Baseline	0.145355
WT	Baseline	0.519143
WT	Baseline	0.346448
WT	Baseline	0.610428
WT	Baseline	0.519143
WT	Baseline	0.346448
WT	Baseline	0.610428
WT	Baseline	0.374805
WT	Baseline	0.819255
WT	Baseline	0.554535
WT	Baseline	0.554535
WT	Baseline	0.358179
WT	Baseline	1.03539
WT	Baseline	1.03539
WT	Baseline	0.383807
WT	Baseline	0.654519
WT	Baseline	0.374689
WT	Baseline	0.664456
WT	Baseline	0.664456
WT	Baseline	0.929618
WT	Baseline	0.667342
WT	Baseline	0.607807
WT	Baseline	0.37232
WT	Baseline	0.223765
WT	Baseline	0.385747
WT	Baseline	0.37829
WT	Baseline	0.37829
WT	Baseline	0.441925
WT	Baseline	0.441925
WT	Baseline	0.230098
WT	Baseline	0.32053
WT	Baseline	0.19741
WT	Baseline	0.532286
WT	Baseline	0.532286
WT	Baseline	0.302963
WT	Baseline	0.43441
WT	Baseline	0.284021
WT	Baseline	0.610428
WT	Baseline	0.156114
WT	Baseline	0.519143
WT	Baseline	0.346448
WT	Baseline	0.610428
WT	KCl	1.64197
WT	KCl	0.69883
WT	KCl	0.369772
WT	KCl	0.384838
WT	KCl	0.330587
WT	KCl	0.290235
WT	KCl	0.206214
WT	KCl	0.124597
WT	KCl	0.260808
WT	KCl	0.156932
WT	KCl	0.314028
WT	KCl	0.0935974
WT	KCl	0.262476
WT	KCl	0.51769
WT	KCl	0.916073
WT	KCl	0.255945
WT	KCl	0.234489
WT	KCl	0.170273
WT	KCl	0.447183
WT	KCl	0.385211
WT	KCl	0.484788
WT	KCl	4.54992
WT	KCl	0.938053
WT	KCl	4.7915
WT	KCl	3.95327
WT	KCl	0.742186
WT	KCl	1.39991
WT	KCl	1.45128
WT	KCl	4.42958
WT	KCl	0.482475
WT	KCl	0.1962
WT	KCl	3.58195
WT	KCl	3.49259
WT	KCl	4.7336
WT	KCl	3.49259
WT	KCl	4.7336
WT	KCl	4.96083
WT	KCl	4.42958
WT	KCl	0.399448
WT	KCl	1.64488
WT	KCl	6.02095
WT	KCl	4.29919
WT	KCl	4.42958
WT	KCl	8.74641
WT	KCl	8.63542
WT	KCl	7.11148
WT	KCl	0.23881
WT	KCl	8.92646
WT	KCl	3.6009
WT	KCl	6.60085
WT	KCl	1.29736
WT	KCl	1.61103
WT	KCl	1.16383
WT	KCl	0.440908
WT	KCl	0.2116
WT	KCl	0.348792
WT	KCl	0.2951
WT	KCl	0.298356
WT	KCl	0.380756
WT	KCl	0.364265
WT	KCl	12.9366
WT	KCl	7.84886
WT	KCl	6.46265
WT	KCl	1.23851
WT	KCl	1.59284
WT	KCl	11.2548
WT	KCl	11.2548
WT	KCl	2.55439
WT	KCl	2.21626
WT	KCl	1.03881
WT	KCl	7.76341
WT	KCl	3.72442
WT	KCl	3.33875
WT	KCl	1.23594
WT	KCl	0.873734
WT	KCl	4.14347
WT	KCl	2.84493
WT	KCl	2.39796
WT	KCl	0.851655
WT	KCl	1.1041
WT	KCl	1.18173
WT	KCl	2.19198
WT	KCl	0.751606
WT	KCl	4.61925
WT	KCl	2.00008
WT	KCl	1.85651
WT	KCl	4.61925
WT	KCl	2.00008
WT	KCl	1.85651
WT	KCl	1.02693
WT	KCl	7.84886
WT	KCl	6.46265
WT	KCl	6.46265
WT	KCl	1.59284
WT	KCl	12.9366
WT	KCl	12.9366
WT	KCl	2.21626
WT	KCl	1.23851
WT	KCl	0.400547
WT	KCl	11.2548
WT	KCl	11.2548
WT	KCl	7.76341
WT	KCl	6.28305
WT	KCl	3.33875
WT	KCl	2.55439
WT	KCl	1.23594
WT	KCl	1.03881
WT	KCl	4.14347
WT	KCl	4.14347
WT	KCl	3.72442
WT	KCl	3.72442
WT	KCl	0.851655
WT	KCl	1.23757
WT	KCl	1.08543
WT	KCl	2.84493
WT	KCl	2.84493
WT	KCl	2.39796
WT	KCl	1.1041
WT	KCl	1.18173
WT	KCl	1.85651
WT	KCl	2.19198
WT	KCl	4.61925
WT	KCl	2.00008
WT	KCl	1.85651
WT-TTX	Baseline	0.0845175
WT-TTX	Baseline	0.0898213
WT-TTX	Baseline	0.0830199
WT-TTX	Baseline	0.0838698
WT-TTX	Baseline	0.146616
WT-TTX	Baseline	0.0450864
WT-TTX	Baseline	0.0679438
WT-TTX	Baseline	0.0265127
WT-TTX	Baseline	0.106871
WT-TTX	Baseline	0.120653
WT-TTX	Baseline	0.0477934
WT-TTX	Baseline	0.0594791
WT-TTX	Baseline	0.505494
WT-TTX	Baseline	1.19005
WT-TTX	Baseline	0.0723387
WT-TTX	Baseline	0.0765759
WT-TTX	Baseline	0.145128
WT-TTX	Baseline	0.0327246
WT-TTX	Baseline	0.0921366
WT-TTX	Baseline	0.56114
WT-TTX	Baseline	0.0590778
WT-TTX	Baseline	0.635185
WT-TTX	Baseline	0.135438
WT-TTX	Baseline	0.0887322
WT-TTX	Baseline	0.138806
WT-TTX	Baseline	0.0632639
WT-TTX	Baseline	0.0722278
WT-TTX	Baseline	0.0634911
WT-TTX	Baseline	0.505494
WT-TTX	Baseline	0.153773
WT-TTX	Baseline	0.138562
WT-TTX	Baseline	0.0755454
WT-TTX	Baseline	0.151742
WT-TTX	Baseline	0.223223
WT-TTX	Baseline	0.243342
WT-TTX	Baseline	0.092632
WT-TTX	Baseline	0.42725
WT-TTX	Baseline	0.524175
WT-TTX	Baseline	0.0316928
WT-TTX	Baseline	0.0476069
WT-TTX	Baseline	0.0695981
WT-TTX	Baseline	0.0470177
WT-TTX	Baseline	0.0826442
WT-TTX	Baseline	0.0419507
WT-TTX	Baseline	0.120837
WT-TTX	Baseline	0.0494373
WT-TTX	Baseline	0.0356277
WT-TTX	Baseline	0.093348
WT-TTX	Baseline	0.141626
WT-TTX	Baseline	0.0669616
WT-TTX	Baseline	0.0316303
WT-TTX	Baseline	0.134665
WT-TTX	Baseline	0.0815656
WT-TTX	Baseline	0.0579587
WT-TTX	Baseline	0.118098
WT-TTX	Baseline	0.161999
WT-TTX	Baseline	0.105146
WT-TTX	Baseline	0.0831522
WT-TTX	Baseline	0.0895306
WT-TTX	Baseline	0.090358
WT-TTX	Baseline	0.135641
WT-TTX	Baseline	0.15276
WT-TTX	Baseline	0.0533683
WT-TTX	Baseline	0.106039
WT-TTX	Baseline	0.0663671
WT-TTX	Baseline	0.124624
WT-TTX	Baseline	0.162532
WT-TTX	Baseline	0.145687
WT-TTX	Baseline	0.284893
WT-TTX	Baseline	0.163761
WT-TTX	Baseline	0.223179
WT-TTX	Baseline	0.304937
WT-TTX	Baseline	0.265351
WT-TTX	Baseline	0.112516
WT-TTX	Baseline	0.0743453
WT-TTX	Baseline	0.142192
WT-TTX	Baseline	0.0520929
WT-TTX	Baseline	0.109943
WT-TTX	Baseline	0.102177
WT-TTX	Baseline	0.0979085
WT-TTX	Baseline	0.0745582
WT-TTX	Baseline	0.0596646
WT-TTX	Baseline	0.0527455
WT-TTX	Baseline	0.0923015
WT-TTX	Baseline	0.352346
WT-TTX	Baseline	0.158383
WT-TTX	Baseline	0.0771707
WT-TTX	KCl	0.0632752
WT-TTX	KCl	0.0938076
WT-TTX	KCl	0.337717
WT-TTX	KCl	0.166946
WT-TTX	KCl	0.89354
WT-TTX	KCl	0.644558
WT-TTX	KCl	0.866526
WT-TTX	KCl	0.20787
WT-TTX	KCl	0.253249
WT-TTX	KCl	2.5887
WT-TTX	KCl	1.25445
WT-TTX	KCl	0.345368
WT-TTX	KCl	1.33127
WT-TTX	KCl	1.13727
WT-TTX	KCl	0.0528751
WT-TTX	KCl	0.0535509
WT-TTX	KCl	0.0321228
WT-TTX	KCl	-0.0190555
WT-TTX	KCl	0.506287
WT-TTX	KCl	1.08098
WT-TTX	KCl	-0.0063163
WT-TTX	KCl	5.78877
WT-TTX	KCl	5.98656
WT-TTX	KCl	7.82259
WT-TTX	KCl	0.168701
WT-TTX	KCl	0.0803686
WT-TTX	KCl	0.240048
WT-TTX	KCl	2.83029
WT-TTX	KCl	1.33127
WT-TTX	KCl	1.29551
WT-TTX	KCl	5.09769
WT-TTX	KCl	2.41331
WT-TTX	KCl	11.6111
WT-TTX	KCl	8.70158
WT-TTX	KCl	8.46911
WT-TTX	KCl	9.34825
WT-TTX	KCl	8.91959
WT-TTX	KCl	4.90486
WT-TTX	KCl	0.40693
WT-TTX	KCl	0.606391
WT-TTX	KCl	1.24211
WT-TTX	KCl	0.387247
WT-TTX	KCl	1.36352
WT-TTX	KCl	0.321183
WT-TTX	KCl	1.19257
WT-TTX	KCl	0.246848
WT-TTX	KCl	0.0306283
WT-TTX	KCl	0.629134
WT-TTX	KCl	0.170629
WT-TTX	KCl	0.337092
WT-TTX	KCl	0.494257
WT-TTX	KCl	1.37842
WT-TTX	KCl	1.05271
WT-TTX	KCl	0.801007
WT-TTX	KCl	1.69617
WT-TTX	KCl	1.23028
WT-TTX	KCl	1.4838
WT-TTX	KCl	3.4011
WT-TTX	KCl	2.02976
WT-TTX	KCl	0.710064
WT-TTX	KCl	1.76023
WT-TTX	KCl	1.34391
WT-TTX	KCl	1.27897
WT-TTX	KCl	0.611494
WT-TTX	KCl	0.622174
WT-TTX	KCl	6.09962
WT-TTX	KCl	5.39023
WT-TTX	KCl	5.29177
WT-TTX	KCl	15.0684
WT-TTX	KCl	14.2563
WT-TTX	KCl	13.6617
WT-TTX	KCl	15.9644
WT-TTX	KCl	14.0972
WT-TTX	KCl	10.0342
WT-TTX	KCl	0.809122
WT-TTX	KCl	1.72322
WT-TTX	KCl	2.18393
WT-TTX	KCl	2.29926
WT-TTX	KCl	2.25131
WT-TTX	KCl	5.12552
WT-TTX	KCl	2.66706
WT-TTX	KCl	1.17356
WT-TTX	KCl	1.85397
WT-TTX	KCl	2.28725
WT-TTX	KCl	3.76787
WT-TTX	KCl	7.01398
WT-TTX	KCl	3.00746
WT-Nimo	Baseline	0.24157
WT-Nimo	Baseline	0.20906
WT-Nimo	Baseline	0.241284
WT-Nimo	Baseline	0.161749
WT-Nimo	Baseline	0.226321
WT-Nimo	Baseline	0.259467
WT-Nimo	Baseline	0.160441
WT-Nimo	Baseline	0.237204
WT-Nimo	Baseline	0.128432
WT-Nimo	Baseline	0.715781
WT-Nimo	Baseline	0.261819
WT-Nimo	Baseline	0.208039
WT-Nimo	Baseline	0.340274
WT-Nimo	Baseline	0.226006
WT-Nimo	Baseline	0.24157
WT-Nimo	Baseline	0.26738
WT-Nimo	Baseline	0.0642128
WT-Nimo	Baseline	0.124523
WT-Nimo	Baseline	0.0939393
WT-Nimo	Baseline	0.12724
WT-Nimo	Baseline	0.3291
WT-Nimo	Baseline	0.106087
WT-Nimo	Baseline	0.0633227
WT-Nimo	Baseline	0.175976
WT-Nimo	Baseline	0.0586482
WT-Nimo	Baseline	0.0655948
WT-Nimo	Baseline	0.138336
WT-Nimo	Baseline	0.0696833
WT-Nimo	Baseline	0.107338
WT-Nimo	Baseline	0.130409
WT-Nimo	KCl	0.424978
WT-Nimo	KCl	0.0793859
WT-Nimo	KCl	0.370634
WT-Nimo	KCl	0.117934
WT-Nimo	KCl	0.414509
WT-Nimo	KCl	0.454849
WT-Nimo	KCl	1.07187
WT-Nimo	KCl	0.440536
WT-Nimo	KCl	0.905401
WT-Nimo	KCl	1.91227
WT-Nimo	KCl	2.72927
WT-Nimo	KCl	0.17916
WT-Nimo	KCl	0.404142
WT-Nimo	KCl	0.719944
WT-Nimo	KCl	0.424978
WT-Nimo	KCl	0.170639
WT-Nimo	KCl	0.112307
WT-Nimo	KCl	0.0838866
WT-Nimo	KCl	0.316867
WT-Nimo	KCl	0.604675
WT-Nimo	KCl	0.25133
WT-Nimo	KCl	0.0820237
WT-Nimo	KCl	0.278936
WT-Nimo	KCl	0.120604
WT-Nimo	KCl	4.98315
WT-Nimo	KCl	1.86108
WT-Nimo	KCl	0.0174293
WT-Nimo	KCl	0.070629
WT-Nimo	KCl	0.112066
WT-Nimo	KCl	0.191364
Cac-RNAi	Baseline	0.146302
Cac-RNAi	Baseline	0.119171
Cac-RNAi	Baseline	0.0975342
Cac-RNAi	Baseline	0.109208
Cac-RNAi	Baseline	0.250584
Cac-RNAi	Baseline	0.186605
Cac-RNAi	Baseline	0.194151
Cac-RNAi	Baseline	0.13457
Cac-RNAi	Baseline	0.239776
Cac-RNAi	Baseline	0.665016
Cac-RNAi	Baseline	0.365345
Cac-RNAi	Baseline	0.780874
Cac-RNAi	Baseline	0.261419
Cac-RNAi	Baseline	0.125229
Cac-RNAi	Baseline	0.20697
Cac-RNAi	Baseline	0.36488
Cac-RNAi	Baseline	0.397005
Cac-RNAi	Baseline	0.240835
Cac-RNAi	Baseline	0.254835
Cac-RNAi	Baseline	0.157567
Cac-RNAi	Baseline	0.161333
Cac-RNAi	Baseline	0.127674
Cac-RNAi	Baseline	0.13003
Cac-RNAi	Baseline	0.320547
Cac-RNAi	Baseline	0.129226
Cac-RNAi	Baseline	0.171544
Cac-RNAi	Baseline	0.0785943
Cac-RNAi	Baseline	0.224153
Cac-RNAi	Baseline	0.111816
Cac-RNAi	Baseline	0.125568
Cac-RNAi	Baseline	0.120021
Cac-RNAi	Baseline	0.137663
Cac-RNAi	Baseline	0.112369
Cac-RNAi	Baseline	0.101856
Cac-RNAi	Baseline	0.134478
Cac-RNAi	Baseline	0.0863076
Cac-RNAi	Baseline	0.110363
Cac-RNAi	Baseline	0.16559
Cac-RNAi	Baseline	0.0528409
Cac-RNAi	Baseline	0.129282
Cac-RNAi	Baseline	0.120782
Cac-RNAi	Baseline	0.112341
Cac-RNAi	Baseline	0.121921
Cac-RNAi	Baseline	0.0394988
Cac-RNAi	Baseline	0.0377354
Cac-RNAi	Baseline	0.10517
Cac-RNAi	Baseline	0.0748303
Cac-RNAi	Baseline	0.0264036
Cac-RNAi	Baseline	0.0636692
Cac-RNAi	Baseline	0.0605799
Cac-RNAi	Baseline	0.206315
Cac-RNAi	Baseline	0.256788
Cac-RNAi	Baseline	0.123216
Cac-RNAi	Baseline	0.0593823
Cac-RNAi	Baseline	0.0355734
Cac-RNAi	Baseline	0.0432562
Cac-RNAi	Baseline	0.0439891
Cac-RNAi	Baseline	0.0553252
Cac-RNAi	Baseline	0.0966668
Cac-RNAi	Baseline	0.050495
Cac-RNAi	Baseline	0.0650993
Cac-RNAi	Baseline	0.0478029
Cac-RNAi	Baseline	0.0375658
Cac-RNAi	Baseline	0.0327442
Cac-RNAi	Baseline	0.0568777
Cac-RNAi	Baseline	0.0737724
Cac-RNAi	Baseline	0.0693767
Cac-RNAi	Baseline	0.100683
Cac-RNAi	Baseline	0.0688474
Cac-RNAi	Baseline	0.0676383
Cac-RNAi	Baseline	0.129136
Cac-RNAi	Baseline	0.14309
Cac-RNAi	Baseline	0.0800853
Cac-RNAi	Baseline	0.0655514
Cac-RNAi	Baseline	0.0588579
Cac-RNAi	Baseline	0.112471
Cac-RNAi	Baseline	0.120907
Cac-RNAi	Baseline	0.0794319
Cac-RNAi	Baseline	0.142655
Cac-RNAi	Baseline	0.105288
Cac-RNAi	Baseline	0.144879
Cac-RNAi	Baseline	0.139935
Cac-RNAi	Baseline	0.0667683
Cac-RNAi	Baseline	0.109473
Cac-RNAi	Baseline	0.130949
Cac-RNAi	Baseline	0.145592
Cac-RNAi	Baseline	0.0947912
Cac-RNAi	KCl	0.938364
Cac-RNAi	KCl	0.229381
Cac-RNAi	KCl	0.353866
Cac-RNAi	KCl	0.658754
Cac-RNAi	KCl	0.134823
Cac-RNAi	KCl	0.349994
Cac-RNAi	KCl	0.148223
Cac-RNAi	KCl	0.0174024
Cac-RNAi	KCl	0.591988
Cac-RNAi	KCl	0.470472
Cac-RNAi	KCl	0.556146
Cac-RNAi	KCl	0.815428
Cac-RNAi	KCl	0.628608
Cac-RNAi	KCl	0.119566
Cac-RNAi	KCl	0.631832
Cac-RNAi	KCl	0.656804
Cac-RNAi	KCl	0.486128
Cac-RNAi	KCl	0.465917
Cac-RNAi	KCl	0.391753
Cac-RNAi	KCl	0.215958
Cac-RNAi	KCl	0.523443
Cac-RNAi	KCl	0.203098
Cac-RNAi	KCl	0.409088
Cac-RNAi	KCl	0.697441
Cac-RNAi	KCl	1.85692
Cac-RNAi	KCl	0.476203
Cac-RNAi	KCl	0.845976
Cac-RNAi	KCl	0.761802
Cac-RNAi	KCl	0.83125
Cac-RNAi	KCl	0.364364
Cac-RNAi	KCl	1.37239
Cac-RNAi	KCl	0.270065
Cac-RNAi	KCl	0.315673
Cac-RNAi	KCl	0.377005
Cac-RNAi	KCl	1.23264
Cac-RNAi	KCl	0.411422
Cac-RNAi	KCl	0.408748
Cac-RNAi	KCl	0.266132
Cac-RNAi	KCl	0.179321
Cac-RNAi	KCl	0.276359
Cac-RNAi	KCl	0.512932
Cac-RNAi	KCl	0.135002
Cac-RNAi	KCl	0.0536139
Cac-RNAi	KCl	1.60686
Cac-RNAi	KCl	0.294283
Cac-RNAi	KCl	7.40285
Cac-RNAi	KCl	1.85341
Cac-RNAi	KCl	0.0305861
Cac-RNAi	KCl	0.34862
Cac-RNAi	KCl	3.51252
Cac-RNAi	KCl	1.69191
Cac-RNAi	KCl	0.739484
Cac-RNAi	KCl	0.721513
Cac-RNAi	KCl	0.218537
Cac-RNAi	KCl	0.551274
Cac-RNAi	KCl	0.296713
Cac-RNAi	KCl	1.60333
Cac-RNAi	KCl	0.0228376
Cac-RNAi	KCl	3.4806
Cac-RNAi	KCl	-0.00743943
Cac-RNAi	KCl	0.0119284
Cac-RNAi	KCl	0.0759875
Cac-RNAi	KCl	0.006811
Cac-RNAi	KCl	0.335029
Cac-RNAi	KCl	0.382396
Cac-RNAi	KCl	1.81415
Cac-RNAi	KCl	0.0742708
Cac-RNAi	KCl	0.918852
Cac-RNAi	KCl	0.995646
Cac-RNAi	KCl	0.644252
Cac-RNAi	KCl	2.57251
Cac-RNAi	KCl	2.09265
Cac-RNAi	KCl	0.104801
Cac-RNAi	KCl	0.07412
Cac-RNAi	KCl	0.104108
Cac-RNAi	KCl	0.556529
Cac-RNAi	KCl	0.203132
Cac-RNAi	KCl	1.10782
Cac-RNAi	KCl	1.12988
Cac-RNAi	KCl	0.144136
Cac-RNAi	KCl	3.32218
Cac-RNAi	KCl	1.31419
Cac-RNAi	KCl	0.591379
Cac-RNAi	KCl	0.104411
Cac-RNAi	KCl	0.0631518
Cac-RNAi	KCl	1.80595
Cac-RNAi	KCl	0.576689

## Sheet: Panel H
	rp49	cac	DCT		DDCT	2^-DDCT	Avg
WT+1	29.5172	33.2872	3.77004		-0.173311	1.12764
WT+2	29.4809	33.2507	3.76982		-0.173534	1.12782
WT+3	29.8708	34.161	4.2902	3.94335	0.346844	0.786302	1.01392
Resc+1	31.2802	34.492	3.21181		-0.731543	1.66041
Resc+3	31.0098	34.4237	3.41387		-0.529484	1.44341	1.55191
40940+1	28.0589	34.0254	5.96647		2.02312	0.246026
40940+2	30.5623	34.6202	4.05789		0.114536	0.923679
40940+3	29.5148	34.0895	4.5747		0.631351	0.645572
40940+4	28.6813	33.6633	4.98201		1.03866	0.486779	0.575514
Set2OE+1	28.9595	33.0542	4.09473		0.151379	0.900389
Set2OE+2	29.2331	32.6768	3.44368		-0.499667	1.41389
Set2OE+3	30.1508	34.0741	3.92332		-0.0200361	1.01398
Set2OE+4	30.5208	33.1329	2.61211		-1.33124	2.5162	1.46111
	rp49	ca-beta	DCT		DDCT	2^-DDCT	Avg
WT+1	29.5172	35.6701	6.15288		-0.315075	1.24408
WT+2	29.4809	36.1908	6.70994		0.241991	0.845578
WT+3	29.8708	36.4118	6.54103	6.46795	0.0730839	0.950604	1.01342
Resc+1	30.2802	34.6136	4.33345		-2.1345	4.39084
Resc+2	29.6806	34.3785	4.69783		-1.77012	3.41083
Resc+3	30.0098	34.7286	4.71882		-1.74913	3.36156	3.72108
40940+1	27.0589	33.0269	5.96805		-0.499902	1.41412
40940+2	27.0562	33.0349	5.97864		-0.48931	1.40377
40940+3	27.0515	33.9084	6.85689		0.388942	0.76369
40940+4	27.6813	33.8228	6.14146		-0.32649	1.25396	1.20888
Set2OE+1	28.9595	33.3121	4.35259		-2.11536	4.33298
Set2OE+2	29.2331	33.9748	4.74168		-1.72627	3.30871
Set2OE+3	29.1508	33.375	4.22413		-2.24382	4.73651
Set2OE+4	30.5208	34.2731	3.75228		-2.71567	6.56898	4.73679

## Sheet: Panel I
CS	THD'GAL4/+	THD'>Ca-alpha-1T	THD'>Ca-alpha-1D	THD'>Ca-beta	THD'>cac
900	900	18	19	14	6
676	87	26	27	24	19
737	105	64	63	36	8
900	214	109	115	41	25
172	238	131	145	43	12
235	733	139	165	48	32
492	676	155	170	55	26
501	737	170	187	14	21
735	900	176	174	37	26
900	172	237	240	41	58
277	235	276	214	71	15
303	492	331	310	138	73
408	501	360	345	128	94
415	735	25	52	246	99
395	900	61	80	330	80
572	277	70	47	394	72
540	303	107	114	437	110
575	408	120	169	46	103
584	415	158	214	93	74
596	395	193	247	116	14
65	572	237	269	177	135
95	540	364	345	203	173
113	575	437	444	235	59
150	584	85	145	302	96
174	596	115	120	397	186
204	65	181	196	433	16
526	95	211	256	20	106
655	113	221	274	18	57
900	150	276	247	28	0
900	174	313	312	33	0
289	204	39	69	56	5
303	526	84	178	81	2
404	655	97	178	133	0
510	900	114	156	138	69
900	900	142	147	111	59
203	289	171	180	185	62
293	303	226	360	216	122
327	404	256	114	24	115
438	510	311	158	31	131
442	900	246	365	37	134
495	203	241	256	60	125
900	293	199	211	69	63
810	327	279	189	86	135
650	438	298	274	135	153
900	442	303	356	188	87
609	495	240	215	195	147
759	900	189	199	218	197
104				270	81
214				245	128
238				274	98
733				240	126
				236
				269

## Sheet: Panel J
CS	THD'GAL4/+	cacRNAi/+	THD'GAL4>cacRNAi	E180A	E180A; UAS-cac
900	900	223	6	0	0
104	87	307	19	0	0
214	105	484	25	0	0
238	214	611	32	0	0
733	238	900	21	0	0
676	733	223	26	0	0
737	676	307	58	0	0
900	737	484	94	0	0
172	900	611	99	0	0
235	172	900	80	0	0
492	235	241	110	0	0
501	492	250	103	0	0
735	501	284	173	0	0
900	735	331	159	0	0
277	900	360	186	0	0
303	277	391	180	0	0
408	303	421	135	0	0
415	408	449	217	0	0
395	415	471	106	0	0
572	395	477	0	0	0
540	572	371	5	0	0
575	540	345	0	0	0
584	575	397	69	0	0
596	584	431	59	0	0
65	596	416	122	0	0
95	65	367	115	0	0
113	95	494	131	0	0
150	113	567	167	0	0
174	150	595	125
204	174	676	135
526	204	889	153
655	526		87
900	655		147
900	900		197
289	900		81
303	289		128
404	303		218
510	404		240
900	510
203	900
293	203
327	293
438	327
442	438
495	442
900	495
810	900
650
900
609
759
