# Supplementary material for: Orai-mediated calcium entry determines activity of central dopaminergic neurons by regulation of gene expression
Source: eLife. 2024 Jan 30;12:RP88808. doi: 10.7554/eLife.88808 (PMC10945566; doi:10.7554/eLife.88808)
Supplement: Figure 7—figure supplement 1—source data 1. [file elife-88808-fig7-figsupp1-data1.xlsx]

## Sheet: Sheet1
	THD'>E180A
CS	Control	0.25(M) NaCl	0.5(M) NaCl	0.25(M) KCl	0.5(M) KCl
900	0	0	15	0	227
104	0	59	18	102	338
214	0	77	0	144	352
238	0	89	0	216	218
733	0	28	0	0	107
676	0	3	26	0	47
737	0	4	37	0	31
900	0	65	0	0	98
172	0	75	0	0	158
235	0	96	0	78	283
492	0	24	0	138	351
501	0	31	0	144	900
735	0	21	0	161	900
900	0	35	75	0	133
277	0	0	78	0	17
303	0	79	86	3	77
408	0	24	97	5	30
415	0	1		25	36
395	0	0		258	11
572		0		313	18
540		0		0	23
575				0	391
584				0	413
596				19	227
65				26	338
95				148	352
113				5	47
150				16	31
174				21	98
204				148	158
526				10	283
655				162	351
900				216	900
900				0	900
289				138	134
303				161	142
404				5	61
510				25	134
900				258	142
203				314	108
293				32	900
327				42	241
438				104	148
442				149	313
495				148	133
900				8	17
810				3	77
650				26	30
900				19	11
609				18	18
759					23
					391
					413
					6
					11
					16
					48
					53
					76
					89
					137
					127
					193
