# Supplementary material for: Orai-mediated calcium entry determines activity of central dopaminergic neurons by regulation of gene expression
Source: eLife. 2024 Jan 30;12:RP88808. doi: 10.7554/eLife.88808 (PMC10945566; doi:10.7554/eLife.88808)
Supplement: Figure 7—figure supplement 2—source data 1. [file elife-88808-fig7-figsupp2-data1.xlsx]

## Sheet: Sheet1
CS	THLexA/+	AlrmGal4/+	LexaOpE180A/+	AlrmGal4>Sand RNAi	THLexA; AlrmGAL4/+	THLexA>LexAopE180A	THLexA; AlrmGAL4>LexAopE180A; Sand RNAi
900	287	900	75	900	450	0	12
900	105	93	108	495	900	0	21
104	214	123	109	642	87	0	25
214	238	211	160	800	105	0	30
238	733	245	288	650	214	0	43
733	676	870	324	520	238	0	51
676	737	663	381	449	733	0	56
737	900	742	428	405	676	0	6
900	172	900	390	900	737	0	11
172	235	900	425	338	900	0	17
235	492	233	470	557	172	0	22
492	501	256	485	900	235	0	22
501	735	485	509	900	492	0	89
735	900	555	501	562	501	0	82
900	277	246	482	145	735	0	75
277	303	900	489	215	900	0	115
303	408	300	123	670	277	0	101
408	415	159	213	650	303	0	121
415	395	236	600	900	408	0	120
395	572	426	653	344	415	0	153
572	540	482	657	735	395	0	45
540	575	555	900	357	572	0	74
575	584	693	900	900	540	0	75
584	596	710	900	243	575	0	91
596	265	200	240	440	584	0	128
65	195	123	244	453	596	0	135
95	113	111	256	620	65	0	15
113	150	213	900	586	95	0	153
150	174	110	900	900	113	0	191
174	204	900		900	150	0	34
204	526	818		735	174	0	36
526	655	154		410	204	0	39
655	900	639		615	526	0	49
900	900	792			655	0	55
900	289	146			900	0	81
289	303	222			900		59
303	404	356			289		45
404	510	536			303		74
510	900	900			404		131
900	203	402			510		70
203	293				900		33
293	327				203		121
327	438				293		165
438	442				327		213
442	495				438
495	900				442
900					495
810					900
650					221
900					211
609
759
