# Supplementary material for: Orai-mediated calcium entry determines activity of central dopaminergic neurons by regulation of gene expression
Source: eLife. 2024 Jan 30;12:RP88808. doi: 10.7554/eLife.88808 (PMC10945566; doi:10.7554/eLife.88808)
Supplement: Figure 7—figure supplement 3—source data 1. [file elife-88808-fig7-figsupp3-data1.xlsx]

## Sheet: A
	THD'>E180A
CS: No Treatment	E180A; No Treatment	E180A; EtOH	E180A;0.5 mM GSK
900	0	0	0
104	0	0	0
214	0	0	0
238	0	0	0
733	0	0	0
676	0	0	86
737	0	0	103
900	0	0	333
172	0	0	26
235	0	0	16
492	0	0	36
501	0	0	10
735	0	0	159
900	0	0	133
277	0	0	0
303	0	0	0
408	0	3	80
415	0	2	321
395	0	5	0
572	0	0	13
540	0	0	71
575	0	0	73
584	0	0	88
596	0	0	76
65	0	0	186
95	0	0	191
113	0	0	246
150	0	0	347
174	0	0	5
204	0	0	7
526	0	0	0
655	0	0	0
900	0	0	0
900	0	0	194
289			0
303			0
404			0
510			0
900			94
203			0
293			0
327			293
438			0
442			0
495			0
900			56
810			5
650			0
900			6
609			277
759			0
			0
			65
			95

## Sheet: B
Time	WT-1	WT-2	WT-3	WT-4	WT-5	WT-6	WT-7	WT-8	WT-9	WT-10	WT-11	WT-12	WT-13	WT-14	WT-15	WT-16	WT-17	WT-18	WT-19	WT-20	WT-21	WT-22	WT-23		EtOH-1	EtOH-2	EtOH-3	EtOH-4	EtOH-5	EtOH-6	EtOH-7	EtOH-8	EtOH-9	EtOH-10	EtOH-11	EtOH-12	EtOH-13	EtOH-15	EtOH-16	EtOH-17	EtOH-18	EtOH-19	EtOH-20	EtOH-21	EtOH-22	EtOH-23	EtOH-24	EtOH-32	EtOH-33
1	0.0781488	-0.0282788	0.0429872	-0.035244	0.0429872	-0.035244	-0.00534291	0.0781488	-0.0424609	-0.0291578	-0.0698117	0.0781488	-0.0250502	-0.0621321	-0.0727935	0.0696437	-0.0621941	-0.0488821	-0.0898393	-0.351914	0.138213	-0.351914	-0.351914		0.0492306	-0.0348981	0.032706	0.00653428	0.0254938	-0.00476534	-0.0518211	-0.112203	-0.0728161	-0.0727335	0.000568096	-0.00121746	-0.028568	-0.0423264	-0.00261591	-0.109539	-0.37384	-0.0114764	-0.0476766	-0.00511409	-0.0303533	-0.0172286	0.0302579	0.0581686	-0.0298644
2	-0.041056	0.0251998	-0.0483028	-0.086984	-0.0483028	-0.086984	0.0206505	-0.041056	-0.00992545	0.10843	0.00639183	-0.041056	0.0405573	-0.0813269	0.0422015	0.0693915	0.00271181	0.0552381	-0.0981917	-0.0765266	-0.140208	-0.0765266	-0.0765266		0.0148487	0.0304087	-0.0255932	-0.0606	-0.0355462	-0.00338357	-0.0288917	-0.10122	-0.155194	-0.0177212	-0.0135582	0.00685272	-0.0232336	-0.0535799	0.0143121	-0.0852958	-0.255262	0.0275193	-0.0166173	-0.0266616	0.0481099	-0.00189409	-0.0654705	0.0427896	0.051414
3	-0.000408826	0.0225727	-0.00380884	0.00749504	-0.00380884	0.00749504	0.0537576	-0.000408826	0.0208474	-0.115014	0.0137921	-0.000408826	0.0405573	0.0325606	-0.0242959	-0.168792	-0.0604039	0.0235477	-0.0987644	-0.448881	0.26021	-0.448881	-0.448881		0.023042	0.0160427	-0.00179108	0.07131	0.0377798	-0.000813956	-0.0248101	-0.0459475	-0.100652	-0.0776657	-0.0508724	0.0930554	-0.0487053	0.0149152	0.0287162	-0.110727	-0.233795	0.04983	-0.0109408	0.012993	0.00687923	0.0129298	0.113302	0.0581574	-0.0472444
4	-0.0661397	0.0501327	-0.0248785	-0.0446877	-0.0248785	-0.0446877	0.0630054	-0.0661397	-0.101132	-0.0970561	-0.046432	-0.0661397	0.01162	0.042109	-0.0617732	0.0161077	-0.0089781	-0.181655	-0.0786398	-0.264083	0.0973673	-0.264083	-0.264083		0.0586639	-0.0583384	-0.0209381	0.0250288	0.0121973	-0.0272126	-0.0299608	-0.0873221	-0.112599	-0.0547965	-0.0208802	0.00737622	0.0124577	0.0291417	-0.00366741	-0.0760794	-0.309163	-0.0626882	0.00808275	-0.0124787	0.0321515	0.0534757	0.0723214	0.0406872	0.101417
5	-0.0928926	-0.0218871	-0.0487478	-0.100852	-0.0487478	-0.100852	-0.1909	-0.0928926	0.0038177	-0.0234996	-0.14857	-0.0928926	-0.0938434	-0.159134	0.0181431	-0.0411692	-0.121672	-0.0791805	-0.056845	-0.161772	0.326022	-0.161772	-0.161772		0.037178	-0.0249976	-0.0163456	0.00910839	0.0253137	0.00151765	-0.0160411	-0.0204672	0.0366654	-0.0197446	-0.00283471	-0.118916	-0.0438879	0.0521433	0.0266206	-0.0821609	-0.194793	-0.0836922	0.0617089	0.0254099	0.0835971	0.0487329	0.036609	-0.0106258	0.0502134
6	0.00657282	-0.0416543	0.00631882	0.0323315	0.00631882	0.0323315	-0.0996811	0.00657282	-0.0258769	-0.0699808	0.0294066	0.00657282	0.0867205	0.125017	-0.0302636	0.168723	0.0220247	0.0348712	-0.078783	0.0108733	0.322703	0.0108733	0.0108733		0.0148207	-0.00588787	0.00245522	-0.00961796	-0.0326247	-0.00129717	-0.00662931	-0.0429374	-0.0627327	-0.00574892	-0.00650876	0.0963702	0.0494519	0.0531053	0.0392801	-0.0873701	-0.163103	0.0011271	0.00232089	0.0530511	0.0604978	0.0227854	0.0534606	0.0541685	0.00506885
7	-0.0482041	0.0425802	0.0569635	0.0265285	0.0569635	0.0265285	0.0045629	-0.0482041	0.0343682	-0.0493656	0.037577	-0.0482041	0.0206271	0.0346906	0.017228	0.0711697	0.00990833	0.0940789	-0.0720378	-0.0552369	0.117111	-0.0552369	-0.0552369		0.0151614	-0.0697724	-0.0557114	0.0660601	0.0419419	-0.00519256	-0.0044963	-0.0286327	-0.0838776	-0.0279656	0.018967	-0.0292684	-0.0251697	0.0503137	0.0328295	-0.0680253	-0.165661	-0.0144124	0.0567374	-0.00737513	-0.0593832	0.0242709	0.00757537	0.0704703	0.0246376
8	-0.0315695	-0.0941043	-0.120566	0.0243153	-0.120566	0.0243153	0.0821021	-0.0315695	-0.0161381	-0.079215	-0.0984437	-0.0315695	-0.0791112	-0.00639214	0.0383821	-0.0680634	0.0258184	-0.114036	-0.0462333	0.441925	0.37829	0.441925	0.441925		-0.0113734	0.000834313	0.0269681	0.0201124	0.0192307	-0.0026511	-0.018865	-0.0306892	-0.063741	-0.0641344	-0.0236852	-0.00435842	-0.00954914	0.0900103	0.0395445	-0.0724327	-0.245353	-0.00438836	-0.0512244	0.0469736	-0.0133121	-0.0493579	0.108525	-0.0201889	-0.0625483
9	-0.0415233	-0.0691272	0.00608413	-0.106066	0.00608413	-0.106066	0.0369017	-0.0415233	-0.0515661	0.0426657	-0.0637492	-0.0415233	-0.0266041	-0.185935	0.0433069	-0.0315277	-0.089424	-0.0725396	-0.0225449	-0.0439456	0.133047	-0.0439456	-0.0439456		-0.0154953	-0.0407224	0.090125	0.0688985	0.0262442	0.0100175	-0.00120444	-0.00975004	-0.0375544	-0.0159934	0.039288	-0.00492589	-0.0328006	-0.0225068	0.0372698	-0.0385942	-0.245392	-0.0265209	0.0446838	0.0188022	-0.00574634	-0.0159363	0.0321323	0.00137077	-0.0429969
10	0.0325911	0.0170563	-0.012368	-0.0784256	-0.012368	-0.0784256	-0.100229	0.0325911	0.0349499	0.014892	-0.00226766	0.0325911	-0.0200126	-0.0122355	-0.122621	-0.000381939	-0.0207452	0.0646629	-0.108755	0.12982	0.0838789	0.12982	0.12982		0.00532605	-0.00462448	0.0223977	-0.0602747	0.0125775	0.0227298	-0.00195178	-0.0120284	-0.00895388	0.0118924	0.015632	-0.0133437	-0.0156776	-0.0170155	0.0289267	-0.00768362	-0.113326	0.0180101	-0.0357038	-0.0214715	0.0197636	0.00304686	0.078645	-0.0485022	0.0509849
11	-0.0392858	0.035882	-0.0575161	0.132811	-0.0575161	0.132811	-0.0569456	-0.0392858	0.0384588	0.065473	-0.0292572	-0.0392858	0.0514025	-0.0635195	0.016438	-0.0340627	0.0314979	0.057706	-0.0288928	-0.241759	0.102915	-0.241759	-0.241759		-0.00903328	-0.0334599	-0.0147325	0.0527707	0.0103164	0.0104769	-0.0126028	0.00458394	-0.0525878	-0.0524366	-0.0115481	0.00833735	0.000602658	-0.00129251	0.0397942	-0.029208	-0.1079	-0.032636	0.00804682	-0.00436961	-0.0567643	0.0218196	0.0482407	0.0127348	-0.142522
12	0.0398047	-0.082108	-0.0221571	-0.158101	-0.0221571	-0.158101	-0.180066	0.0398047	-0.0367447	-0.0853905	-0.0436745	0.0398047	-0.0783365	-0.0676	-0.100518	-0.0195358	0.0576384	-0.0706409	-0.0832373	-0.387253	0.205983	-0.387253	-0.387253		-0.0259897	-0.0318867	-0.00124971	0.0059731	0.0753683	0.00605858	-0.0102759	0.00578923	-0.00265982	-0.0606139	-0.00802988	0.0555816	-0.00147621	0.01363	0.0354785	-0.00342236	-0.19444	-0.00894781	-0.00996629	0.00318806	0.0148194	-0.0227783	0.0359774	-0.026083	0.0585783
13	-0.117709	-0.100738	-0.0203501	-0.124214	-0.0203501	-0.124214	0.0196119	-0.117709	0.00816522	0.113564	0.0719284	-0.117709	-0.0211173	0.0135453	0.0446653	-0.0623535	-0.0154357	0.00172343	-0.0129519	-0.0960062	-0.0338209	-0.0960062	-0.0960062		0.00631461	0.0233926	-0.0716728	0.0278185	0.00708476	0.010643	0.0105016	-0.00154772	-0.00776303	0.0250872	0.0138664	0.0235187	0.013184	0.0683287	0.0317468	-0.0133736	-0.0858049	-0.00712913	-0.0901428	-0.000109491	-0.00368261	-0.0160637	-0.0634943	-0.0213238	0.0417835
14	-0.015806	-0.0058417	0.0571738	-0.0544257	0.0571738	-0.0544257	0.108803	-0.015806	-0.0340582	-0.030658	-0.0411797	-0.015806	0.0493169	-0.00426211	-0.0278311	-0.081895	-0.0786874	-0.0477435	-0.0253613	-0.14505	0.160622	-0.14505	-0.14505		0.0344245	0.047675	0.0481223	0.0400669	-0.0251211	0.00368319	0.00525167	0.0213289	0.0167427	-0.0194072	0.00452772	-0.0580166	-0.0114284	0.068796	0.0321676	-0.0231724	-0.10275	0.0123164	-0.0394043	0.0304684	-0.0208431	-0.0624596	-0.00704398	0.0122808	0.0160559
15	0.0807864	0.0104893	-0.034615	0.0976473	-0.034615	0.0976473	-0.134702	0.0807864	0.0194615	0.0135082	0.0250868	0.0807864	-0.0546384	-0.0268845	0.010942	0.0234665	0.064096	-0.0192128	0.0302404	0.157919	0.30432	0.157919	0.157919		0.0133128	-0.0331262	0.0343412	0.043499	0.0450334	0.00252724	0.0132494	-0.0196538	0.00280942	-0.058127	-0.00176151	0.0292771	-0.0364996	0.049829	-0.000231993	0.0199012	0.0916701	0.0219501	-0.00875823	0.00714612	0.0279121	-0.0474962	0.026472	0.0368434	-0.00571886
16	-0.0338088	0.0526065	-0.0330184	-0.0362266	-0.0330184	-0.0362266	-0.0574898	-0.0338088	-0.0349131	-0.0955559	-0.0201524	-0.0338088	0.0732992	0.018646	-0.0296953	0.0624757	0.00142763	-0.133327	-0.0710828	0.211703	-0.0538372	0.211703	0.211703		0.00417552	0.0544767	-0.0159589	-0.035233	0.0203613	-0.000303535	0.00344502	0.000449272	0.0168959	0.00133281	0.0040661	-0.0162669	0.017526	0.113966	0.0191265	0.0249208	-0.0457051	0.00745715	0.00862615	-0.0100986	0.068594	0.0718571	-0.0290466	0.000637728	-0.0352821
17	-0.0734205	-0.0170057	-0.0660227	0.0473812	-0.0660227	0.0473812	0.0829237	-0.0734205	0.0291485	-0.11438	-0.0495947	-0.0734205	0.0613906	-0.0935685	-0.0505027	0.151028	0.0586885	0.05587	-0.0663421	0.17283	0.0146403	0.17283	0.17283		-0.00644737	-0.0278104	-0.0366196	0.0679226	-0.0408188	0.00466118	-0.000934883	0.0285328	0.037338	0.029619	-0.026938	-0.0489413	0.0404601	0.0777774	-0.00383858	0.0114505	-0.0771581	-0.0137929	0.0341166	0.00869525	-0.0253468	-0.0802202	-0.0760837	0.0593928	-0.00750887
18	0.0629517	-0.0351314	-0.118081	0.137582	-0.118081	0.137582	0.0714316	0.0629517	0.0467944	0.00230822	0.00535707	0.0629517	-0.0866836	0.00752245	-0.0607643	-0.00818376	0.0219475	0.00880843	-0.0807875	0.0819826	-0.0814655	0.0819826	0.0819826		-0.0148362	-0.0542224	0.00645477	-0.0625641	0.0143483	-0.000675404	0.0117359	0.0318686	0.0912076	0.0293233	0.0011725	-0.0782569	0.023545	0.0605132	0.0127078	0.0232307	0.0367046	0.00920513	0.0198535	-0.0497018	-0.0183462	0.0792169	-0.0578821	0.008117	-0.00231655
19	0.0444142	0.0273009	0.0157937	-0.0155222	0.0157937	-0.0155222	-0.0654251	0.0444142	0.0433028	-0.126097	-0.0511568	0.0444142	-0.0477215	0.199487	-0.0799605	-0.154966	0.000980377	-0.103535	0.008636	-0.00584821	-0.2473	-0.00584821	-0.00584821		-0.00779338	0.0199997	-0.0479222	-0.011086	0.00396323	0.00152547	0.00873281	0.00958352	0.0304934	-0.0316112	0.00160087	0.0466383	-0.0240596	0.0742201	0.0221491	0.0289999	-0.0123998	-0.0010112	-0.0893165	0.015427	0.0255556	-0.0717206	-0.0263796	-0.0124008	-0.01681
20	0.0571738	0.00525733	0.0257662	-0.0434571	0.0257662	-0.0434571	0.0523349	0.0571738	-0.0298305	0.0236154	-0.00210524	0.0571738	-0.0223458	-0.0552687	0.0559386	0.0652691	-0.0442414	0.0926215	0.0590674	0.0875852	-0.069011	0.0875852	0.0875852		-0.00605083	0.0252996	-0.0225991	-0.0203007	-0.0162367	0.0106868	-0.00290243	0.0154489	0.0339762	-0.0154659	0.029759	-0.126071	-0.0270158	0.0681572	0.0227024	0.010266	0.0983921	0.0299433	0.0180885	-0.0324583	0.0464306	-0.0253317	-0.0291856	-0.0302431	-0.0938929
21	0.0450161	0.06075	0.0554464	0.09863	0.0554464	0.09863	0.0974214	0.0450161	-0.0740733	-0.0282913	0.0294066	0.0450161	-0.0453059	0.000936481	0.00601723	0.0420543	0.00206972	0.0280396	-0.118778	0.190672	-0.302887	0.190672	0.190672		-0.0096979	0.00792995	-0.0789611	0.0321493	0.00996618	-0.00190673	-0.000376504	0.0279931	-0.00650966	-0.0258995	0.0122977	0.0123934	0.0336303	0.00208575	0.00458248	0.0111259	-0.0139763	-0.000321064	-0.0206143	0.00642043	-0.019529	0.0272976	0.0416693	-0.0670851	0.0777006
22	0.0525979	-0.0445007	0.000300194	0.00306865	0.000300194	0.00306865	0.0743873	0.0525979	-0.0350847	0.0588901	0.109663	0.0525979	0.0430921	0.0501803	-0.0910121	-0.0350779	0.095274	0.168721	0.00249503	-0.164271	-0.0593833	-0.164271	-0.164271		-0.00434178	-0.044163	-0.113134	-0.0288242	0.00739492	-0.01007	0.00495372	0.0333185	0.0225789	0.00989022	0.031138	0.00454098	0.0667258	0.000547014	-0.0199721	0.043827	0.121745	0.0419443	0.0269536	0.0065207	0.0154719	-0.0392718	-0.0710014	0.0387969	0.0523241
23	-0.137783	0.0298176	-0.026842	0.0875153	-0.026842	0.0875153	-0.0355476	-0.137783	-0.0504715	0.126439	0.000754489	-0.137783	-0.0765764	-0.183985	0.042929	-0.0445287	0.0376627	0.0236104	-0.0343336	-0.310886	-0.197424	-0.310886	-0.310886		0.00377897	-0.0267298	0.0342417	0.0708057	-0.031204	-0.00113078	0.011542	0.0461285	0.0347405	0.05546	0.0170586	0.0264419	0.012157	-0.0205578	-0.015111	0.0264585	0.107595	-0.000391775	-0.0133839	0.0139004	0.0187395	0.066449	0.0435864	0.00998124	0.0275848
24	-0.016707	0.0843688	0.138282	0.0260859	0.138282	0.0260859	-0.109587	-0.016707	0.0382365	-0.0111421	0.034657	-0.016707	0.0607351	0.0975715	-0.0236309	0.0364737	-0.087635	0.0315806	-0.0203815	-0.139706	-0.0406199	-0.139706	-0.139706		-0.000951617	0.0995058	0.0546483	0.0300388	-0.000829125	0.0116288	0.0159833	0.0353301	0.0666404	0.0460803	0.0105998	0.0399648	0.0131424	0.00315219	0.0300487	0.0455852	0.0718524	0.0194243	-0.0199541	-0.0299629	-0.00178864	0.00984445	0.00364495	-0.0918262	0.0299902
25	-0.03608	0.0425152	0.00139927	0.0149712	0.00139927	0.0149712	0.171297	-0.03608	-0.0197495	0.0105077	0.0103648	-0.03608	0.0366703	0.0364534	-0.00282351	-0.0641317	-0.00598333	0.036767	0.0412652	0.398484	0.313294	0.398484	0.398484		-0.0107032	-0.0010568	0.0234805	0.063913	0.0163193	0.0160037	0.00694019	0.0368611	0.0335184	0.046059	0.0152317	-0.048244	0.00841642	-0.0621536	0.016361	-0.0101531	0.0164177	0.0088346	0.0359849	-0.00568061	-0.00401662	0.112441	0.0346067	0.00342478	0.0308657
26	0.010947	0.013554	-0.00344333	0.0402503	-0.00344333	0.0402503	0.0346574	0.010947	0.00510202	-0.00877537	0.060004	0.010947	0.03761	0.0259746	0.0483596	-0.0461161	-0.0229043	0.0604899	0.0442719	-0.104022	-0.130526	-0.104022	-0.104022		0.00854308	0.0769475	0.0195509	-0.0471235	-0.00418077	0.0216489	0.0267716	0.0570676	0.0742493	0.115784	0.0460526	-0.0294861	0.0362857	-0.0135602	0.0245723	-0.00593525	0.0808956	-0.00108191	0.0479891	-0.0390233	0.0135485	0.00554362	-0.0632273	0.0241286	0.0960731
27	-0.0388858	0.0139916	-0.00504001	-0.0673596	-0.00504001	-0.0673596	-0.083156	-0.0388858	-0.0263388	0.00946664	-0.0264796	-0.0388858	-0.149875	0.146815	-0.0192745	-0.0385051	0.0444119	-0.0156091	-0.015275	-0.118847	0.0348738	-0.118847	-0.118847		-0.00661492	0.0579252	-0.0094661	-0.0213133	0.0262842	0.0184422	0.0245202	0.0283553	0.0667019	0.0138528	0.0212014	-0.0360738	0.0500034	-0.104669	0.0181296	0.00516584	0.172938	0.0178856	0.0779885	-0.044696	0.021352	0.0221715	-0.0122212	0.0128762	-0.0309176
28	-0.0813031	0.0113425	0.0361042	0.0405956	0.0361042	0.0405956	0.0224005	-0.0813031	0.047958	0.0217077	-0.103574	-0.0813031	0.0284424	0.113518	0.0245512	0.0813157	0.00965468	-0.0207954	0.0635854	-0.16384	-0.349663	-0.16384	-0.16384		-0.0211753	0.111409	0.0217643	0.0294044	-0.0324146	0.000171544	0.0193319	0.0204192	0.0879375	0.0627947	0.0162638	0.00759609	0.0264083	-0.0202869	-0.0200034	0.00743834	0.23553	-0.0177867	0.0423889	-0.000113251	-0.0444049	-0.009529	-0.0492671	-0.0891322	-0.0756938
29	0.0551027	0.00718317	0.0335649	0.0280534	0.0335649	0.0280534	-0.160585	0.0551027	0.0483346	0.0252902	-0.00488285	0.0551027	0.0289329	-0.0299449	-0.0828022	0.0232143	-0.0123625	-0.0075107	0.0748329	-0.269168	0.10879	-0.269168	-0.269168		0.0149715	0.0029638	0.0452755	-0.0157177	-0.0194783	-0.00331602	0.0213562	0.0757213	0.0563735	0.0297034	0.0350363	0.0939726	0.0413872	-0.0695863	-0.0698837	-0.0132682	0.195034	0.0336372	0.037139	-0.000452907	-0.0352599	-0.0434057	-0.051864	-0.0457747	0.0682955
30	0.121768	-0.0232441	0.0668052	0.105958	0.0668052	0.105958	-0.116971	0.121768	0.0334787	0.121706	0.061506	0.121768	-0.0320038	-0.0666697	0.0598204	-0.0612768	-0.00576889	0.059098	0.0689625	-0.0648043	-0.398885	-0.0648043	-0.0648043		-0.00448141	-0.00917745	0.00842509	-0.00895105	0.0158891	-0.0163174	0.00851024	0.0488062	0.119899	0.0383868	-0.00193104	0.00323224	0.0457445	-0.0288158	-0.0387699	0.0260707	0.13354	-0.0038057	0.034431	0.00333971	0.00907602	0.011336	-0.0108616	0.0110901	-0.0889823
31	0.0875008	0.0281321	0.113236	-0.0860988	0.113236	-0.0860988	0.04637	0.0875008	0.0369013	0.151497	0.101696	0.0875008	0.0484139	0.0767037	0.124235	-0.107454	0.0375659	0.0363258	0.0429354	0.141284	0.0406927	0.141284	0.141284		-0.00103539	0.0360185	-0.0370984	-0.00235514	0.0120972	-0.00105165	0.015775	0.0178009	0.0392932	0.08598	0.0375556	0.0277485	0.0122665	-0.0636525	-0.0711695	0.0167824	0.168378	-0.0156654	0.0529067	0.0103948	0.00468519	0.0422175	-0.0977286	-0.0313297	-0.00248992
32	-0.00501664	0.0139475	-0.0531185	-0.0425232	-0.0531185	-0.0425232	-0.0544274	-0.00501664	0.0268032	-0.00115783	-0.106006	-0.00501664	-0.0174366	-0.00675939	-0.0092658	-0.00926051	-0.0202979	-0.0201009	0.0555352	0.351422	-0.18138	0.351422	0.351422		0.00124333	0.044449	-0.0548496	-0.0400803	0.0454836	0.00392088	0.0045373	-0.0036703	0.00687303	0.0655774	-0.0136945	0.105184	0.011798	-0.091243	-0.0260951	0.0145694	0.0289961	0.00802284	-0.0355241	0.0263549	0.0352751	-0.00252106	0.027233	-0.00199676	-0.0224747
33	0.106973	-0.00465996	-0.0718849	0.0850565	-0.0718849	0.0850565	-0.0376284	0.106973	0.0232262	0.0482657	0.0448166	0.106973	-0.0536575	0.0364534	0.0401497	0.134729	0.0112109	0.0413841	-0.0192045	0.301517	-0.238435	0.301517	0.301517		-0.0383719	-0.0180927	-0.0337801	0.00328513	-0.0401384	-0.00145167	0.00147258	0.00264597	-0.0748328	0.017352	-0.00716076	-0.0479822	-0.028076	-0.0108531	-0.030855	0.0533817	0.13134	0.049864	0.0385088	0.0384722	0.0570705	-0.0319493	-0.0487208	-0.0533879	-0.115555
34	0.0158575	-0.118271	-0.0176031	-0.108968	-0.0176031	-0.108968	0.0873555	0.0158575	0.0210697	-0.0912815	-0.0400847	0.0158575	0.0484964	0.0292227	-0.0842885	-0.150967	0.00669912	-0.0184556	0.0835346	-0.0777333	-0.113339	-0.0777333	-0.0777333		-0.00636359	0.00948733	-0.0276335	0.00088181	-0.0268419	-0.0180475	0.00898801	0.0212255	0.0501096	0.000278888	-0.00491265	0.0113024	-0.0186088	-0.0451702	-0.0430078	0.0359463	0.250904	-0.0143586	0.0341346	0.0370509	-0.0438525	-0.0599447	-0.0880415	-0.070914	0.0466681
35	-0.0663733	-0.0186251	-0.0248529	-0.0987383	-0.0248529	-0.0987383	0.0809532	-0.0663733	0.0586379	-0.00935736	0.00499207	-0.0663733	0.0646634	0.0304224	-0.0167794	0.102377	-0.0432293	0.0669402	0.0256901	0.109133	-0.197643	0.109133	0.109133		-0.030737	0.0329593	0.0348752	-0.0756827	-0.0466216	-0.0118834	0.00431505	0.0120465	-0.0216045	-0.0356165	-0.0207035	-0.0115994	0.0165905	-0.0183778	-0.0406705	0.0863058	0.118955	-0.0197157	0.0164359	-0.0063524	-0.0632134	0.00527463	0.0583502	0.0381346	-0.0866505
36	-0.0769608	-0.0168304	-0.0471781	0.0750727	-0.0471781	0.0750727	0.0317585	-0.0769608	-0.0105245	-0.0963642	-0.0400044	-0.0769608	-0.00413445	-0.0578639	0.0405618	-0.0770712	0.0742101	0.024117	0.0676417	0.316773	0.132884	0.316773	0.316773		-0.0015604	-0.0276833	-0.0173032	-0.0645161	-0.0647505	-0.0220261	-0.000816419	0.00153652	0.0252379	-0.00380978	-0.0299196	0.0488642	-0.0357318	-0.0258353	-0.00559922	0.0439868	0.171638	-0.0426798	-0.0292189	0.00799714	-0.0488398	-0.000108229	0.0197258	-0.0126389	0.0300292
37	-0.0230195	0.0406972	-0.00223909	0.0722199	-0.00223909	0.0722199	-0.00337242	-0.0230195	-0.0914451	-0.0344151	0.0475942	-0.0230195	0.111115	-0.00184644	0.0844813	0.0317791	-0.0296928	0.0732651	0.13955	0.110426	-0.348302	0.110426	0.110426		-0.0280785	-0.00827957	0.038186	-0.00575883	-0.00022883	-0.00136848	-0.00460954	-0.023618	-0.0524043	-0.0282817	-0.0549201	0.00275272	-0.0559106	-0.0321543	-0.0138104	0.0799554	0.167237	0.0130433	0.0300254	-0.00229407	-0.0719648	-0.0312071	0.0455626	0.0750584	-0.0314204
38	0.0117489	0.00856227	0.0551847	0.166894	0.0551847	0.166894	0.165386	0.0117489	0.0420185	0.0758065	-0.0337375	0.0117489	-0.0263978	-0.0264275	0.0792098	0.0966671	-0.0127902	-0.146928	0.187579	0.140939	-0.149726	0.140939	0.140939		-0.0232083	-0.0528875	0.0951299	-0.106283	-0.0373971	-0.0142904	-0.00555562	-0.0140698	0.0325403	-0.0209043	-0.0294984	-0.0379919	0.00337448	-0.0800492	-0.0796998	0.0813964	0.229906	0.01267	-0.0932954	-0.0762564	0.0469922	0.0255956	-0.0571004	0.0204411	0.0913055
39	0.0400383	-0.0148825	0.055917	-0.0474896	0.055917	-0.0474896	0.0492689	0.0400383	-0.0275196	0.00455856	0.139553	0.0400383	0.00405217	0.100354	0.0777577	0.0412298	0.0581445	0.0164001	0.172895	0.337545	0.0819745	0.337545	0.337545		-0.020695	-0.0899072	0.0642126	-0.0592987	-0.0562564	-0.00718796	-0.00516793	-0.029084	-0.0663385	0.0242234	-0.0425255	-0.0400419	-0.0687594	-0.0669463	-0.0720652	0.139676	0.310154	-0.000182471	-0.12541	0.00206506	-0.089874	-0.0378823	-0.0132768	-0.0562978	-0.0101007
40	0.133959	0.0929499	0.0953068	-0.0150795	0.0953068	-0.0150795	0.0347143	0.133959	0.0567718	0.157563	0.186617	0.133959	0.0253346	-0.0264275	0.075578	0.0182058	0.0688026	-0.0557138	0.158545	-0.00127997	-0.0239761	-0.00127997	-0.00127997		-0.0231357	-0.0346677	0.052295	-0.0682125	-0.059578	-0.00518881	0.0068834	0.000745271	0.0251764	0.0566613	-0.0282896	-0.0870265	-0.0358565	-0.0419188	-0.0368535	0.0662869	0.324541	0.118861	-0.0450359	-0.00698408	-0.0714215	0.0271509	-0.0343698	-0.0829478	-0.0419437
41	0.0937796	-0.0324161	-0.147996	0.0321854	-0.147996	0.0321854	0.141089	0.0937796	0.0294226	0.0329077	0.193977	0.0937796	0.0426842	0.235379	0.213404	0.035963	0.0983472	0.1283	0.236498	0.264195	-0.316104	0.264195	0.264195		-0.0118873	-0.0177033	0.021687	-0.0391409	-0.00373055	0.0404541	0.0179364	0.0528517	0.158033	0.164979	-0.00889248	0.0120877	-0.0105262	0.24289	0.0840656	0.0820197	0.385286	-0.015473	-0.0377516	0.0208489	-0.0252789	-0.096484	-0.0130249	-0.0254207	-0.0654175
42	0.112317	-0.000894088	0.0106382	-0.0467526	0.0106382	-0.0467526	-0.0930049	0.112317	0.0795177	0.0599894	0.134363	0.112317	0.170947	-0.0255869	0.109773	0.0102133	0.0703	0.157841	0.316234	0.479419	0.112704	0.479419	0.479419		-0.0185	0.00259034	0.0360021	-0.0866746	-0.0580472	0.0905667	0.0476673	0.10649	0.152625	0.157602	-0.0303747	0.194613	0.112694	0.623727	0.204875	0.150133	0.644266	0.0882601	0.00184036	0.0178271	-0.0429844	-0.00138847	-0.0210729	-0.0729382	0.0519081
43	0.306203	0.297277	0.219472	0.252865	0.219472	0.252865	0.0412233	0.306203	0.187702	1.36235	1.36482	0.306203	0.352213	-0.0319852	1.66725	0.117218	0.274897	0.263034	0.500473	0.304102	-0.0155456	0.304102	0.304102		-0.0319378	-0.0966532	0.0935684	-0.0821241	0.00358304	0.0971265	0.0582096	0.0873109	0.269592	0.187827	0.0516689	0.22707	0.152602	0.79635	0.211513	0.13152	0.825203	0.0519683	-0.0467335	0.0267885	0.00617633	-0.0161405	-0.0305894	-0.0481785	-0.0125538
44	1.641	2.26154	1.68761	2.2684	1.68761	2.2684	1.57083	1.641	0.844067	5.01016	3.96042	1.641	6.37983	1.86546	6.19763	2.20183	3.2694	4.12387	1.05374	0.367541	0.138213	0.367541	0.367541		0.0165745	-0.0564393	0.0858787	0.0140452	-0.0322946	0.0904757	0.0435194	0.0847743	0.26507	0.135049	-0.00288883	0.370158	0.118614	0.836021	0.213382	0.0894506	0.684922	0.0751983	0.00383882	0.0184889	0.00935406	-0.0555093	0.00437846	-0.0823711	0.00916463
45	4.21192	3.58195	3.38751	4.43639	3.38751	4.43639	3.9045	4.21192	1.24025	5.85219	4.29919	4.21192	8.66308	6.25777	7.11148	6.80836	3.6009	6.24991	1.20816	1.53218	0.213272	1.53218	1.53218		-0.0232977	0.000127133	0.00259517	-0.060909	-0.016787	0.0806494	0.0274432	0.0604332	0.208327	0.142405	-0.0189581	0.426347	0.182483	0.828104	0.203325	0.0659028	0.600036	0.0211921	-0.0489475	0.0200418	0.0106085	-0.0690712	0.0882192	-0.117739	-0.0105471
46	4.42958	3.51562	3.44022	4.1384	3.44022	4.1384	4.36728	4.42958	1.31009	6.02095	4.23566	4.42958	8.74641	8.36972	6.7004	8.68961	3.55597	6.19576	1.25837	3.58384	0.237149	3.58384	3.58384		-0.000532734	-0.0468964	0.00598337	-0.0792653	-0.0195783	0.0860217	0.0287532	0.0293613	0.15681	0.0498529	-0.00411134	0.519092	0.191784	0.824979	0.181194	0.0556789	0.583599	0.0139428	-0.00197244	0.0320313	-0.0121257	-0.0679254	0.115647	-0.0501879	0.0358327
47	4.35861	3.53007	3.37824	4.49787	3.37824	4.49787	4.47891	4.35861	1.27236	5.6713	4.1709	4.35861	8.34603	8.46969	6.84126	8.92646	3.55002	6.20652	1.29736	3.39413	0.194344	3.39413	3.39413		-0.0217673	-0.0504084	0.0303748	-0.0453546	-0.0695629	0.0708076	0.0395275	0.0189845	0.0984797	0.162787	0.00448012	0.456796	0.19256	1.00716	0.174556	-0.00517569	0.394682	-0.086218	-0.00321193	0.0743717	-0.0183123	0.0445342	0.00137973	-0.0130222	-0.068187
48	4.24889	3.49839	3.35474	4.59324	3.35474	4.59324	4.345	4.24889	1.32255	5.2277	4.10165	4.24889	7.92199	8.18313	6.78692	8.72659	3.4087	6.29723	1.22493	2.27094	0.765546	2.27094	2.27094		-0.0195333	-0.00700823	0.0687683	0.0203523	-0.0666815	0.0668008	0.0448956	-0.0126199	0.0390492	0.112264	0.019042	0.292507	0.182533	1.03525	0.0816197	-0.0344382	0.275514	-0.0639101	-0.0658559	0.0114463	0.0305778	0.0260183	-0.038808	-0.0499162	0.0381645
49	4.24031	3.43529	3.46899	4.45277	3.46899	4.45277	4.73752	4.24031	1.33738	5.37909	4.03267	4.24031	7.87913	8.63542	6.6148	8.33306	3.39835	5.72533	1.17674	2.6302	1.69583	2.6302	2.6302		-0.00314098	-0.00388552	0.0327502	-0.0862028	-0.035206	0.0586335	0.035862	-0.0040626	0.0576268	0.0352047	-0.0362428	0.408329	0.222373	1.11731	0.0567222	-0.0900255	0.329851	-0.0579873	-0.0335931	0.0187408	-0.139488	0.0326106	0.0659909	0.00516622	-0.0437121
50	4.23516	3.44187	3.42669	4.33001	3.42669	4.33001	4.64564	4.23516	1.3677	4.76426	3.9005	4.23516	7.68522	7.86902	6.47887	7.59434	3.31633	5.97924	1.13409	2.69183	2.00476	2.69183	2.69183		-0.0280897	0.0241236	0.0466897	-0.0834579	0.00576411	0.0598611	0.0205805	-0.0362879	0.0161931	0.0801209	-0.0373772	0.248139	0.168883	1.21967	0.0509108	-0.0866241	0.232542	-0.0560612	-0.073962	0.00790063	-0.0127001	-0.112164	0.0589227	-0.0834316	-0.0428539
51	4.18106	3.46486	3.43494	4.3157	3.43494	4.3157	4.65806	4.18106	1.39435	4.42078	3.81274	4.18106	7.51669	7.5755	6.18298	7.50293	3.26506	5.95425	1.16246	1.83067	2.4538	1.83067	1.83067		-0.0395503	-0.0517274	0.0697737	-0.0313169	-0.118507	0.0430472	0.0426915	-0.0556587	0.00629323	0.0280803	-0.045717	0.24356	0.153595	1.19475	0.0458939	-0.147807	0.247601	-0.132305	-0.0898599	-0.0380294	-0.0527351	-0.0708247	-0.0104817	-0.0194	-0.141807
52	4.22805	3.41219	3.44828	4.48528	3.44828	4.48528	4.81024	4.22805	1.50599	4.29861	3.65066	4.22805	7.23401	7.26993	6.07834	7.60354	3.19453	5.97702	1.13016	3.72442	3.45849	3.72442	3.72442		-0.00565428	-0.00321807	0.0678365	-0.13361	-0.0626395	0.0390248	0.0343011	-0.057922	-0.085863	-0.013105	-0.0490181	0.234834	0.197794	1.23641	0.00453585	-0.102694	0.247403	-0.152652	-0.0305527	0.0243583	-0.0224911	0.0793383	-0.0910499	-0.0730796	-0.0229731
53	4.14592	3.38288	3.42043	4.26136	3.42043	4.26136	4.5895	4.14592	1.47209	3.99266	3.70671	4.14592	6.77526	7.15725	6.24705	7.1741	3.14307	5.8142	1.07873	2.72346	2.74626	2.72346	2.72346		-0.00936838	0.0335473	0.00879337	-0.0354079	-0.0396782	0.0320691	0.0277079	-0.0209927	-0.0125597	-0.105826	-0.0711452	0.166215	0.199823	1.23543	0.0345981	-0.14138	0.252906	-0.169108	-0.0263133	0.0399236	-0.0505603	0.0913458	-0.0458982	-0.0514456	-0.0605979
54	4.21045	3.3725	3.37497	4.25585	3.37497	4.25585	4.78283	4.21045	1.51933	4.02996	3.57656	4.21045	6.87271	7.08881	5.77449	6.9632	3.10197	5.71356	1.08644	3.05892	2.43335	3.05892	3.05892		-0.0101503	0.0420176	0.129579	0.00917752	-0.0210791	0.0220133	0.0417597	-0.0830619	-0.0204742	-0.140878	-0.0925798	0.10274	0.163681	1.31596	0.00313347	-0.134346	0.232227	-0.0568022	0.00847795	0.0539585	-0.0860503	-0.144076	-0.0330417	-0.015292	-0.087136
55	4.15407	3.37657	3.37934	4.41844	3.37934	4.41844	4.78923	4.15407	1.56547	4.11299	3.58999	4.15407	6.58115	6.64125	5.49783	6.38939	3.01011	5.7233	1.02473	2.11114	3.01342	2.11114	2.11114		-0.0236942	0.0970187	0.0925041	-0.0170475	-0.0604484	0.00596351	0.0290087	-0.0788536	-0.0717462	-0.186806	-0.0840223	0.0786593	0.143017	1.26178	0.00794794	-0.156135	0.185715	-0.0880395	0.055947	0.013864	-0.008056	-0.118916	0.0708213	-0.0222206	-0.0589856
56	4.23055	3.32364	3.41942	4.32318	3.41942	4.32318	4.68537	4.23055	1.64488	3.93804	3.39188	4.23055	6.15862	6.34374	5.5504	6.60214	2.95257	5.47685	0.989384	2.59339	3.21129	2.59339	2.59339		-0.036283	0.0703445	0.00779901	-0.0688469	-0.0248309	0.00381799	0.0248325	-0.0554963	0.00711805	-0.170281	-0.0701809	0.13162	0.158312	1.33981	-0.0269209	-0.17758	0.158861	-0.115634	0.0200331	-6.43705e-05	-0.0703323	-0.0545173	0.0713842	0.0073914	0.103298
57	4.04281	3.42502	3.36982	4.36503	3.36982	4.36503	4.63191	4.04281	1.58445	3.65617	3.40828	4.04281	6.70377	6.69262	5.58823	6.38261	2.97496	5.57535	1.00132	1.91204	3.05562	1.91204	1.91204		-0.00994924	0.0797286	0.0134669	-0.00605568	-0.00256998	-0.00700593	0.00810361	-0.0967302	-0.103738	-0.131604	-0.0761376	-0.000911739	0.130519	1.29536	-0.045345	-0.175876	0.101066	-0.120284	-0.0404597	0.000853078	0.0324974	-0.0505937	0.0597099	0.00664719	-0.127894
58	4.08096	3.31272	3.39513	4.20229	3.39513	4.20229	4.96083	4.08096	1.48457	3.95017	3.42765	4.08096	5.94621	6.11662	5.1696	6.53992	2.9219	5.55896	1.06463	1.70052	3.49999	1.70052	1.70052		-0.0167407	-0.0506945	0.0313323	-0.0871585	-0.00471103	0.00291537	0.0238818	-0.108394	-0.113088	-0.0983224	-0.0780323	0.0406621	0.15802	1.22343	-0.0703745	-0.225179	0.15269	-0.1223	0.0663974	0.0290834	-0.0620581	0.00364248	0.101672	-0.0445877	0.0249886
59	4.06182	3.23995	3.32203	4.18138	3.32203	4.18138	4.65866	4.06182	1.62328	3.42765	3.34716	4.06182	6.07808	6.07053	5.28154	6.23684	2.94592	5.71071	1.00159	2.98005	3.49091	2.98005	2.98005		-0.0052354	0.0347789	0.0420935	-0.0248268	-0.0267519	-0.00178788	0.0366802	-0.0853105	-0.0577212	-0.124269	-0.0840699	0.0610783	0.11959	1.18081	-0.0595149	-0.224889	0.119622	-0.143531	0.0840647	-0.0154554	-0.112917	-0.0748828	0.1237	-0.0236681	0.0463647
60	3.98597	3.29786	3.41389	4.14607	3.41389	4.14607	4.53254	3.98597	1.53067	3.47857	3.27396	3.98597	6.21305	6.67806	5.33181	6.35381	2.94827	5.57136	1.0024	2.05951	3.31223	2.05951	2.05951		-0.043041	0.0213505	-0.0169459	-0.0168198	0.00179216	-0.0147339	0.0407334	-0.0723003	-0.0577212	-0.165286	-0.0592937	-0.0342416	0.0811019	1.2273	-0.0754227	-0.24766	0.0643856	-0.152299	0.0224762	-0.009388	-0.0898924	-0.0496209	-0.0299948	0.0158791	0.0571914
61	3.95193	3.27354	3.41366	4.08395	3.41366	4.08395	4.59721	3.95193	1.63973	3.35507	3.41013	3.95193	5.7661	5.98975	5.26061	6.38102	2.85972	5.16886	0.943121	2.22449	3.62378	2.22449	2.22449		-0.0295418	0.0465626	0.0164463	-0.0932583	-0.00589161	-0.0109964	0.0348118	-0.0785207	-0.0572937	-0.138306	-0.0291183	-0.0569696	0.107619	1.17974	-0.098178	-0.264937	0.0702807	-0.141177	0.0248878	0.0201383	-0.0872239	-0.152659	-0.0302563	-0.0935565	-0.185179
62	3.95581	3.29293	3.44488	3.99454	3.44488	3.99454	4.82053	3.95581	1.55712	3.53464	3.35258	3.95581	5.68273	5.73425	4.95723	5.85111	2.83906	5.36148	0.930378	1.86963	3.65005	1.86963	1.86963		0.00366169	-0.0233369	0.0463251	-0.0704532	-0.0367368	-0.0177229	0.0488685	-0.0785873	-0.110003	-0.141953	-0.0847088	-0.0186666	0.120702	1.1078	-0.0953499	-0.264447	0.0451192	-0.165892	0.0795379	-0.064579	-0.0493114	0.0098576	0.0225044	-0.0861219	0.0518777
63	3.94078	3.28866	3.47312	3.87385	3.47312	3.87385	4.53188	3.94078	1.52364	3.51345	3.23434	3.94078	5.34116	6.39716	5.10071	6.15152	2.86662	5.29702	0.942882	1.58743	3.57874	1.58743	1.58743		0.00513616	0.0670232	-0.0319792	-0.0955884	-0.039158	-0.0214838	0.0354789	-0.0711465	-0.0227661	-0.200675	-0.116874	-0.123977	0.0796162	1.13915	-0.109809	-0.243914	0.0278596	-0.0958885	0.103313	-0.00979283	-0.121978	-0.0330759	0.0731402	-0.0366098	-0.0443839
64	4.06606	3.30685	3.4844	3.82142	3.4844	3.82142	4.52985	4.06606	1.5576	3.06841	3.21597	4.06606	5.73331	5.90174	5.11507	5.99498	2.84739	5.1576	0.924507	2.59219	4.07614	2.59219	2.59219		-0.00179497	0.00901853	-5.27872e-05	0.0398473	-0.0129751	-0.0371852	0.0331661	-0.0761541	-0.0979328	-0.169839	-0.0822638	-0.108054	0.0627843	1.10152	-0.126137	-0.285275	0.0123652	-0.145457	0.0459413	-0.00884906	-0.0643026	-0.0271621	0.0681763	-0.0255249	-0.076799
65	3.86626	3.20327	3.43755	3.71602	3.43755	3.71602	4.49915	3.86626	1.58325	3.14093	3.32691	3.86626	5.63354	6.14287	5.05177	5.93078	2.81755	5.19916	0.958601	1.26688	4.14347	1.26688	1.26688		-0.0133226	0.0275482	0.0625295	-0.020439	-0.00860294	-0.0181426	0.0458841	-0.0902511	-0.0630997	-0.183792	-0.105797	-0.223614	0.0808344	1.18605	-0.127913	-0.304697	0.0111078	-0.195201	-0.0105411	-0.0203924	-0.0808914	0.0789672	0.0278385	-0.0491199	-0.0370461
66	3.96265	3.28897	3.45671	3.77327	3.45671	3.77327	4.62419	3.96265	1.5075	3.50819	3.26153	3.96265	5.75595	5.88858	5.1141	5.95457	2.85707	5.31802	0.93531	2.83706	4.02382	2.83706	2.83706		-0.00700588	-0.0558036	0.0625222	-0.0424714	2.12925e-05	-0.0290929	0.0348356	-0.0699705	-0.0753218	-0.239268	-0.0813399	-0.296424	0.0722196	1.06277	-0.111818	-0.322887	0.0207024	-0.201548	0.0419623	-0.016873	-0.0912881	-0.0706012	0.0613489	-0.00773087	-0.0409079
67	4.00714	3.21432	3.42714	3.85285	3.42714	3.85285	4.57713	4.00714	1.47748	3.47015	3.35367	4.00714	5.39624	5.68909	5.01918	6.01604	2.82233	5.23104	0.920053	1.73172	3.65271	1.73172	1.73172		9.83839e-05	0.0175603	-0.022043	-0.0354526	-0.0344657	-0.0396635	0.036576	-0.0434327	-0.0295492	-0.195617	-0.109376	-0.140858	0.0904776	1.02815	-0.135563	-0.291193	0.0320669	-0.131156	0.102374	-0.017254	-0.00272828	-0.089648	0.0119985	-0.0218857	0.0284213
68	3.79589	3.21292	3.37055	3.72035	3.37055	3.72035	4.56482	3.79589	1.58121	3.38296	3.1921	3.79589	5.49774	5.91714	4.84198	5.9618	2.82461	5.24711	0.910779	2.38972	3.81572	2.38972	2.38972		-0.00123087	0.0391492	-0.0462097	-0.0432644	-0.0124849	-0.041049	0.0292499	-0.0752887	-0.00171299	-0.253558	-0.103433	-0.164198	0.0811102	1.05693	-0.128217	-0.330048	-0.0654793	-0.188395	0.0417961	0.00739804	-0.08895	-0.0894174	0.058013	-0.023895	-0.0507637
69	3.85501	3.23871	3.39455	3.93026	3.39455	3.93026	4.46162	3.85501	1.48467	3.07026	3.37424	3.85501	5.43611	5.78183	4.93892	5.82758	2.79614	5.23016	0.873902	2.75647	3.79081	2.75647	2.75647		0.0423498	0.0590217	-0.0491965	0.0197342	-0.0573669	-0.038155	0.0414712	-0.0600672	0.0417676	-0.200781	-0.0703171	-0.100811	0.0681617	0.99481	-0.109832	-0.321723	-0.112069	-0.167219	0.127056	0.0139042	-0.0619893	-0.0506321	0.0616269	-0.13656	0.110809
70	3.94939	3.15791	3.41575	3.69065	3.41575	3.69065	4.48706	3.94939	1.5183	3.25196	3.18908	3.94939	5.32233	5.77237	4.8722	5.44426	2.84636	5.29968	0.926353	1.71801	3.95148	1.71801	1.71801		0.0253989	-0.000937609	-0.00593795	-0.0642721	-0.0117945	-0.0342118	0.0297701	-0.0802368	-0.0524043	-0.207652	-0.0644556	-0.136105	0.0591865	1.00983	-0.130421	-0.333753	0.00992786	-0.135716	0.194272	0.0519131	-0.0437901	-0.246379	-0.0595322	-0.0511814	0.13225
71	3.95227	3.21879	3.35903	3.94251	3.35903	3.94251	4.47168	3.95227	1.46141	3.21951	3.22222	3.95227	5.19022	5.63846	4.83819	6.21293	2.81858	5.13584	0.873313	2.30413	3.95344	2.30413	2.30413		-0.0168022	0.0593157	-0.0370137	-0.0202641	-0.0213792	-0.0463621	0.020746	-0.0555478	-0.000245854	-0.148171	-0.0830175	-0.123845	0.0659996	1.02883	-0.142956	-0.34627	-0.0594634	-0.13577	0.0505445	-0.0438399	-0.0969718	-0.112274	0.116188	-0.0722796	-0.0307833
72	3.89843	3.13225	3.37366	3.64658	3.37366	3.64658	4.52279	3.89843	1.43194	3.10848	3.16329	3.89843	5.23323	5.21288	4.67507	5.44705	2.76385	5.09416	0.849641	2.82172	3.75051	2.82172	2.82172		0.00138296	0.0229396	-0.0792926	0.0702079	0.00608427	-0.038622	0.0328019	-0.0672488	-0.00501228	-0.153482	-0.0412006	-0.127597	0.103469	0.96143	-0.138951	-0.374832	-0.0729509	-0.153855	0.0874823	0.00537514	-0.142687	-0.0277385	0.0307464	0.0157116	0.0158262
73	3.8829	3.13974	3.34139	3.70181	3.34139	3.70181	4.65007	3.8829	1.48511	3.02252	3.18614	3.8829	5.19235	5.91065	4.73684	5.95679	2.7958	5.30651	0.855098	3.1914	3.24865	3.1914	3.1914		0.0294928	0.0105441	0.0362967	-0.00942277	0.0369394	-0.055804	0.0325323	-0.0524045	-0.0860768	-0.203436	-0.128481	-0.183567	0.0714338	0.879625	-0.164356	-0.374213	-0.107315	-0.132217	0.0984132	0.000388087	-0.116033	-0.122911	0.112177	-0.0149683	0.103519
74	4.03957	3.1573	3.33815	4.02563	3.33815	4.02563	4.60542	4.03957	1.46736	2.99821	3.16978	4.03957	5.14807	5.8321	4.8368	5.66748	2.82121	4.92722	0.868524	1.17914	3.40502	1.17914	1.17914		0.0359045	0.066308	0.0332916	0.0287985	0.05843	-0.0535355	0.0373139	-0.069919	0.00449032	-0.245697	-0.0759407	-0.233911	0.0713589	0.891833	-0.138897	-0.370748	-0.141167	-0.155427	0.137444	-0.0073275	-0.0640998	0.00373248	-0.0942798	-0.0936309	0.0136591
75	4.05848	3.1421	3.41151	3.72266	3.41151	3.72266	4.61538	4.05848	1.50081	2.92742	3.18063	4.05848	4.95526	5.63642	4.79348	5.88035	2.84814	5.23073	0.926385	2.18191	3.65886	2.18191	2.18191		0.0237458	-0.0410482	0.0124136	0.00857974	0.0326873	-0.0486978	0.0450281	-0.0661394	-0.0282354	-0.2129	-0.0842941	-0.201192	0.0832736	0.876936	-0.182771	-0.393617	-0.195223	-0.126506	0.16196	-0.0219829	-0.0678795	-0.179303	0.00824971	-0.130346	-0.125909
76	4.01165	3.18352	3.46634	3.8285	3.46634	3.8285	4.38993	4.01165	1.57617	3.02015	3.10773	4.01165	5.44806	5.84582	4.51281	5.72609	2.81726	5.19315	0.872868	1.61208	3.32551	1.61208	1.61208		0.0470469	0.0161698	-0.0128543	0.0157572	0.0254938	-0.0521816	0.0378201	-0.0609547	0.00757584	-0.163304	-0.0689447	-0.188978	0.0633775	0.849974	-0.16212	-0.400137	-0.110067	-0.0913262	0.217423	-0.00335565	-0.0390524	-0.106506	0.0690061	-0.0111319	-0.016823
77	4.1208	3.16984	3.40654	3.76835	3.40654	3.76835	4.49603	4.1208	1.49655	3.11224	3.18415	4.1208	5.16411	5.40383	4.85875	5.614	2.86993	5.12117	0.802009	2.2294	4.09251	2.2294	2.2294		0.0312242	0.0591886	-0.111911	0.127001	0.0286554	-0.0672928	0.0382551	-0.0397866	0.023313	-0.196249	-0.0691624	-0.209089	0.0603216	0.86168	-0.144031	-0.409157	-0.226836	-0.136655	0.162854	-0.0180348	-0.0582188	-0.12645	0.109007	-0.0444277	-0.055527
78	4.01867	3.07816	3.2846	3.7415	3.2846	3.7415	4.39092	4.01867	1.47871	2.95074	3.06377	4.01867	4.78603	5.23365	4.48054	5.47408	2.80073	5.18815	0.838027	1.69129	4.01898	1.69129	1.69129		0.044204	0.0570829	-0.0498225	0.0266148	0.00458353	-0.0649215	0.0322249	-0.0500968	0.0456185	-0.221268	-0.135945	-0.284472	0.04668	0.828658	-0.172629	-0.379085	-0.154297	-0.148232	0.21189	-0.00605912	-0.112634	-0.17961	0.130785	-0.0787728	-0.0233589
79	3.99726	3.10982	3.39219	3.74086	3.39219	3.74086	4.3073	3.99726	1.45665	3.1493	3.11462	3.99726	5.05491	5.03556	4.70201	5.7807	2.79738	5.50659	0.71817	1.38738	4.09741	1.38738	1.38738		0.0460974	0.0417872	0.0456069	-0.00244867	0.0435127	-0.0614258	0.0436519	-0.0603925	-0.055155	-0.222765	-0.0970558	-0.165724	0.0692136	0.791616	-0.184026	-0.409948	-0.0793198	-0.125924	0.230545	-0.0120839	-0.064209	-0.0786072	0.0758018	0.0319353	0.0619546
80	3.99495	3.16583	3.3561	3.80701	3.3561	3.80701	4.09023	3.99495	1.48149	3.04358	3.18669	3.99495	5.06433	5.57113	4.58237	5.8572	2.82959	5.03078	0.867889	1.98573	3.33785	1.98573	1.98573		0.053358	-0.0612307	0.0440381	-0.0307314	0.0546982	-0.07221	0.0347031	-0.0474417	0.0181483	-0.255393	-0.1212	-0.310732	0.0791242	0.826819	-0.195695	-0.416444	-0.214804	-0.110209	0.235135	-0.00568813	-0.00524073	-0.103096	0.0543606	-0.0124752	0.00616106
81	4.06546	3.02836	3.32718	3.78758	3.32718	3.78758	4.23239	4.06546	1.48191	2.85883	3.13936	4.06546	5.19272	5.77395	4.3981	5.67452	2.7825	5.1514	0.806003	1.88954	3.8192	1.88954	1.88954		0.0342458	-0.0880081	0.00568874	0.050587	0.102762	-0.06274	0.0507036	-0.0199644	0.184678	-0.159321	-0.0603604	-0.291583	0.0519645	0.761505	-0.184859	-0.415975	-0.321471	-0.0533374	0.183903	-0.0581794	-0.0892877	-0.0936869	-0.0306375	-0.157607	0.106908
82	4.20848	3.16218	3.36183	3.93105	3.36183	3.93105	4.35206	4.20848	1.42677	3.04774	3.12083	4.20848	5.09899	5.34781	4.70431	5.92875	2.8202	5.26881	0.844009	1.7855	3.69372	1.7855	1.7855		0.0409814	-0.033158	0.0181072	0.00539565	0.0533075	-0.0676175	0.0432449	-0.0314361	0.0572598	-0.135904	-0.10018	-0.204725	0.072519	0.786466	-0.199996	-0.413557	-0.236078	-0.130079	0.178998	-0.0427332	-0.146623	-0.0195454	0.0200891	-0.0185033	0.00429737
83	3.97468	3.1509	3.34205	3.77652	3.34205	3.77652	4.52307	3.97468	1.43743	2.88112	3.09911	3.97468	5.17115	5.99708	4.92003	5.45111	2.77328	5.13901	0.875986	2.09735	3.78896	2.09735	2.09735		0.0583735	-0.0657359	-0.060569	-0.00534404	0.09917	-0.0687381	0.0423651	-0.0415542	0.0553046	-0.203309	-0.120501	-0.288266	0.0742735	0.684486	-0.181447	-0.416224	-0.210089	-0.122405	0.153045	-0.0229329	-0.0234491	-0.0648533	0.00589366	-0.0641157	0.0266139
84	4.0531	3.11472	3.38403	3.71381	3.38403	3.71381	4.46944	4.0531	1.44147	2.90721	3.23402	4.0531	5.02082	5.68288	4.6663	5.7691	2.84601	5.15501	0.866409	1.63122	4.0112	1.63122	1.63122		0.0283479	-0.126394	-0.00264918	0.0531855	0.0545581	-0.0749851	0.0470002	-0.0255263	0.0447927	-0.1679	-0.10797	-0.195608	0.0890252	0.682162	-0.185623	-0.417459	-0.268198	-0.131561	0.179183	-0.00870618	-0.0562404	-0.0829859	0.0612306	-0.0245351	0.0230903
85	3.95584	3.16023	3.45454	3.71002	3.45454	3.71002	4.349	3.95584	1.43645	3.36489	3.1655	3.95584	4.90684	5.44658	4.56519	5.65232	2.77626	5.09156	0.753059	2.59891	4.11655	2.59891	2.59891		0.0220646	-0.0441789	0.0169472	-0.0639996	0.0746179	-0.059664	0.0426964	-0.0496974	0.00632348	-0.220425	-0.117302	-0.247433	0.056556	0.710086	-0.207326	-0.441874	-0.155477	-0.0956056	0.251087	0.00747074	-0.0968902	-0.0872675	-0.0501878	-0.0516056	-0.0746579
86	4.03483	3.05643	3.38921	3.72301	3.38921	3.72301	4.14686	4.03483	1.42254	3.41379	3.1522	4.03483	4.77404	5.59728	4.42193	5.93554	2.79559	5.00092	0.844789	1.04985	3.82584	1.04985	1.04985		0.0452149	0.012912	-0.0137897	0.0555522	0.0389804	-0.0641139	0.0508407	-0.0424493	0.0576873	-0.252947	-0.09438	-0.27819	0.0660828	0.700883	-0.187695	-0.456123	-0.189328	-0.115105	0.214203	0.0065207	-0.0867376	0.0154963	-0.0338977	-0.168078	0.0259421
87	3.9878	3.08453	3.35181	3.52771	3.35181	3.52771	4.11562	3.9878	1.33207	2.91119	3.18022	3.9878	4.73123	5.45029	4.53371	5.71639	2.78707	4.9727	0.798	1.82722	3.69041	1.82722	1.82722		0.0483705	-0.00643613	-0.0193876	0.0339183	0.0791001	-0.0704285	0.0515785	-0.0273977	0.059949	-0.114636	-0.100744	-0.17192	0.0858861	0.676467	-0.199404	-0.4543	-0.258918	-0.115034	0.213376	-0.021568	-0.116728	-0.0969573	0.0102686	-0.0511628	0.011362
88	4.01422	3.10612	3.37851	3.74957	3.37851	3.74957	4.52908	4.01422	1.41479	2.90086	3.15986	4.01422	5.0762	5.60377	4.55269	5.34417	2.84412	5.15026	0.77471	2.20957	3.54633	2.20957	2.20957		0.0646902	-0.0540397	-0.0146368	0.126037	0.0888449	-0.0754958	0.0518908	-0.0337069	0.236561	-0.147791	-0.0947399	-0.196001	0.107318	0.710451	-0.22113	-0.466601	-0.205645	-0.126028	0.198646	-0.0214677	-0.0430349	-0.0480019	-0.000424469	-0.111365	-0.00951992
89	3.9348	3.08782	3.35731	3.56307	3.35731	3.56307	4.24175	3.9348	1.43813	3.18111	3.26567	3.9348	5.18383	5.46012	4.43305	5.97474	2.80641	5.03495	0.836229	1.95789	3.2344	1.95789	1.95789		0.07662	-0.0152878	0.00746755	-0.0440899	0.052357	-0.0674314	0.0447585	-0.0345278	0.00931825	-0.14718	-0.0841651	-0.210048	0.125109	0.645938	-0.218972	-0.463031	-0.230922	-0.0757188	0.220791	-0.0274061	-0.0860384	-0.202018	0.0745866	-0.0786426	-0.0689368
90	4.14388	3.1532	3.31205	3.82506	3.31205	3.82506	4.19912	4.14388	1.35834	3.00173	3.12251	4.14388	4.97634	5.68659	4.43236	5.99174	2.793	5.11206	0.798081	1.16086	3.75704	1.16086	1.16086		0.0644556	-0.062351	-0.0148541	-0.0547971	0.0294357	-0.0663348	0.043614	-0.0114883	0.0626685	-0.119484	-0.112955	-0.226582	0.0910624	0.61713	-0.201468	-0.471921	-0.282392	-0.0477173	0.161466	-0.0438688	-0.133189	-0.0652315	0.00553997	-0.0122966	-0.0194538
91	3.95942	3.1495	3.40293	3.76442	3.40293	3.76442	4.27699	3.95942	1.35969	3.25663	3.22996	3.95942	5.04366	5.70634	4.40324	5.65149	2.84101	5.14913	0.816917	1.8255	3.55606	1.8255	1.8255		0.0280184	-0.0176954	-0.0419008	0.050038	0.0593905	-0.0665012	0.0467829	-0.0233074	0.124361	-0.145473	-0.0912354	-0.156216	0.135127	0.68561	-0.223748	-0.480784	-0.173524	-0.171957	0.257774	0.00658462	-0.103367	-0.112689	-0.0518791	-0.0588244	-0.0444922
92	4.04615	3.12455	3.3956	3.76191	3.3956	3.76191	4.43031	4.04615	1.38105	3.16616	3.26662	4.04615	5.09658	5.60906	4.52033	5.51156	2.81648	4.95506	0.859695	2.4972	3.96459	2.4972	2.4972		0.0340615	-0.00588787	0.00013872	-0.00389636	0.0811111	-0.0743321	0.0438931	-0.017975	0.177436	-0.206893	-0.0760965	-0.31492	0.105807	0.633502	-0.23079	-0.480454	-0.239144	-0.0517478	0.317328	-0.00132147	-0.0503667	-0.0564245	0.0064345	-0.0837181	-0.00102497
93	4.02207	3.1133	3.35254	3.79417	3.35254	3.79417	4.2	4.02207	1.44666	3.29526	3.2443	4.02207	4.72235	5.45372	4.4136	5.58064	2.83385	5.0228	0.787883	1.51115	3.9381	1.51115	1.51115		0.0327825	-0.0846709	-0.0274641	0.0464879	0.120611	-0.0747199	0.0440347	-0.0150532	0.158064	-0.115901	-0.101654	-0.264535	0.0899606	0.608506	-0.250156	-0.48655	-0.282667	-0.0447106	0.250624	0.01376	-0.128839	-0.0403528	-0.0564316	-0.118837	-0.0869366
94	4.1709	3.09001	3.4186	3.69743	3.4186	3.69743	4.27874	4.1709	1.45008	3.13117	3.21652	4.1709	4.91769	6.03668	4.40833	5.65467	2.84885	5.1602	0.954305	2.40092	3.62851	2.40092	2.40092		0.0705658	0.000397292	-0.0637105	0.0700493	0.0682848	-0.0622887	0.0530827	0.00399194	0.202798	-0.204447	-0.0939653	-0.29036	0.062776	0.571755	-0.239297	-0.492808	-0.216811	-0.0766551	0.303806	-0.0107266	-0.140321	-0.110353	0.0877637	0.0543322	-0.0933078
95	3.99756	3.13149	3.37285	3.8827	3.37285	3.8827	4.37494	3.99756	1.42275	3.39543	3.25928	3.99756	4.84009	5.46253	4.28389	5.16218	2.91383	5.20289	0.71615	2.04917	3.76606	2.04917	2.04917		0.0564466	0.00769952	-0.0820657	-0.00457547	0.088965	-0.0892809	0.0492706	0.0369277	0.187336	-0.124754	-0.0746706	-0.225055	0.168339	0.574403	-0.244571	-0.521754	-0.337633	-0.033114	0.292296	-0.04385	-0.101672	-0.0393355	0.0470461	-0.0917146	-0.0405178
96	4.04979	3.14885	3.32035	3.83008	3.32035	3.83008	4.31327	4.04979	1.35076	2.92326	3.28353	4.04979	5.13149	5.08304	4.41003	5.39219	2.85651	5.15994	0.829436	1.46564	3.80941	1.46564	1.46564		0.0868184	-0.0631138	-0.0244589	0.0259357	0.0363892	-0.0612319	0.0527044	0.0210627	0.168728	-0.105341	-0.0707716	-0.350518	0.061081	0.554355	-0.239048	-0.519621	-0.317699	-0.170967	0.309334	-0.0085658	-0.0389615	-0.102762	0.0172996	-0.0657753	0.0229082
97	4.12822	3.11166	3.3554	3.98574	3.3554	3.98574	4.32427	4.12822	1.33816	3.50692	3.29213	4.12822	5.00327	5.67843	4.56295	5.8834	2.88397	5.42682	0.793498	1.78559	3.92194	1.78559	1.78559		0.0242428	-0.0981947	0.00514369	0.0488993	0.106914	-0.0725822	0.0605508	-0.0268727	0.15678	-0.0857383	-0.0738895	-0.275049	0.0757093	0.519585	-0.27348	-0.493322	-0.367316	-0.0455083	0.27876	-0.0245121	-0.079259	-0.124914	0.0419803	-0.138391	0.0502914
98	4.09528	3.17161	3.33553	3.83416	3.33553	3.83416	4.14457	4.09528	1.33524	3.06697	3.30584	4.09528	5.20258	5.15158	4.41919	6.03487	2.92836	5.2752	0.792003	2.20173	3.28444	2.20173	2.20173		0.0140388	-0.0194753	-0.0900869	0.00032063	0.101711	-0.0742845	0.0484998	0.0109965	0.171172	-0.113161	-0.102184	-0.376607	0.0736887	0.591583	-0.244267	-0.490376	-0.236784	-0.046303	0.353848	-0.00219756	-0.0880764	-0.124223	-0.0133084	-0.0483906	0.0538368
99	3.98931	3.02416	3.38686	3.69522	3.38686	3.69522	4.15233	3.98931	1.24331	3.22436	3.30697	3.98931	4.78009	5.25359	4.61821	5.6964	2.88701	5.03716	0.865486	2.08416	3.69041	2.08416	2.08416		0.0401548	-0.00607062	0.0232706	0.0322185	0.0572794	-0.0789005	0.0461491	-0.0089366	0.181164	-0.142606	-0.129561	-0.304059	0.114581	0.564681	-0.266711	-0.513506	-0.255146	-0.0872447	0.215869	-0.0251087	-0.0596301	-0.0617872	-0.025335	-0.115849	-0.0408125
100	4.08119	3.1652	3.32634	3.69212	3.32634	3.69212	4.28027	4.08119	1.34391	3.1101	3.30468	4.08119	5.16959	5.18542	4.4741	6.20734	2.8894	5.34965	0.92333	1.69276	3.69329	1.69276	1.69276		0.0225003	-0.0634158	-0.00494727	0.00679861	0.0608012	-0.0787382	0.0582853	0.00362982	0.228769	-0.138285	-0.108507	-0.333286	0.0244057	0.545348	-0.266936	-0.504904	-0.289428	-0.11254	0.278428	0.0213214	-0.0728796	-0.147046	0.0481705	-0.0508055	-0.00499072
101	4.0337	3.03018	3.37246	3.70019	3.37246	3.70019	4.45784	4.0337	1.2651	2.99872	3.26721	4.0337	4.93598	5.54535	4.65635	5.70694	2.88913	5.20049	0.83693	1.58166	3.14966	1.58166	1.58166		0.0388367	-0.0422163	-0.0510268	0.0737702	0.107944	-0.0717271	0.0548564	0.000981804	0.143977	-0.0223586	-0.0862436	-0.320331	0.106291	0.540648	-0.276495	-0.531166	-0.333227	-0.0456299	0.291438	-0.0418559	-0.132922	-0.237392	-0.00271171	-0.0231806	0.0775489
102	4.02214	3.16163	3.3639	3.91492	3.3639	3.91492	4.26763	4.02214	1.41427	3.41293	3.39695	4.02214	5.10645	5.72564	4.59898	5.84249	2.88924	5.58344	0.881443	1.50365	3.59637	1.50365	1.50365		0.020216	-0.0753742	0.0085945	0.0334587	0.129445	-0.0743952	0.0531251	0.0299014	0.146361	-0.0919572	-0.106537	-0.209394	0.124258	0.567855	-0.249307	-0.533374	-0.329494	-0.0270696	0.258914	-0.0287246	-0.0992622	-0.100779	0.00958875	-0.0426193	-0.0542051
103	4.09836	3.02368	3.33537	3.64717	3.33537	3.64717	4.26216	4.09836	1.3471	3.32263	3.35002	4.09836	4.86919	5.58597	4.51448	5.99314	2.92064	5.44864	0.813591	1.94022	3.63406	1.94022	1.94022		0.0331511	-0.0915599	-0.0118342	-0.0462492	0.0879645	-0.0803298	0.0642352	0.0137772	0.122924	-0.102201	-0.0960915	-0.357149	0.0892843	0.473231	-0.265184	-0.529033	-0.21331	-0.0999897	0.287293	-0.0364377	-0.087502	-0.0341892	0.0557368	-0.0578383	0.0751955
104	4.07992	3.11382	3.38429	3.70412	3.38429	3.70412	4.07616	4.07992	1.29038	3.36743	3.25026	4.07992	4.85912	5.66897	4.59775	5.76979	2.92573	5.31612	0.755174	1.91023	3.65777	1.91023	1.91023		0.0391886	-0.0565108	-0.0684834	0.0130367	0.111546	-0.0805753	0.0663777	0.0189916	0.120204	-0.136809	-0.106218	-0.350738	0.0317191	0.500976	-0.275334	-0.531173	-0.211424	0.0109559	0.346636	0.000593635	-0.0547015	-0.127045	-0.054337	-0.0595983	0.00836714
105	3.95868	3.10064	3.34255	4.05858	3.34255	4.05858	4.17707	3.95868	1.31701	3.01749	3.40595	3.95868	5.16362	5.92419	4.31117	5.99225	2.94785	5.50387	0.803998	2.47582	3.99787	2.47582	2.47582		0.0170939	-0.068811	-0.0632023	-0.0218297	0.135458	-0.076846	0.0647792	0.00874035	0.155925	-0.12509	-0.106653	-0.335512	0.0923901	0.458741	-0.290065	-0.540775	-0.213706	-0.096737	0.369751	-0.0573034	-0.115206	-0.111582	0.000988887	0.00596997	0.0497583
106	4.07401	3.1175	3.31389	3.78247	3.31389	3.78247	4.15693	4.07401	1.29666	3.1336	3.31575	4.07401	5.07223	5.83219	4.47009	6.18768	2.92925	5.41094	0.811683	2.2581	3.5546	2.2581	2.2581		0.027404	-0.0134126	0.0228065	0.0202059	0.108895	-0.0878876	0.0644575	-0.00247211	0.156841	-0.101736	-0.10287	-0.346506	0.118513	0.466037	-0.272927	-0.550911	-0.210911	-0.0153853	0.328883	-0.0732572	-0.0611809	0.0203533	-0.058756	-0.0422211	0.0655737
107	4.12708	3.05872	3.31449	3.53105	3.31449	3.53105	4.27398	4.12708	1.38578	3.01327	3.293	4.12708	5.08811	6.09733	4.60384	6.39345	2.9495	5.36938	0.879215	2.28137	3.4531	2.28137	2.28137		0.00351089	-0.0849887	-0.0666236	0.00525739	0.0717265	-0.0737303	0.0700008	0.0413064	0.236958	-0.0985541	-0.106068	-0.35475	0.0770453	0.410933	-0.268604	-0.559905	-0.281013	-0.0379224	0.349029	-0.0787594	-0.139984	-0.0954273	-0.0551834	-0.0971361	-0.0487787
108	4.06846	3.09432	3.28575	3.56228	3.28575	3.56228	3.93241	4.06846	1.25053	3.15	3.36043	4.06846	4.51854	6.25517	4.49595	6.09336	2.92546	5.16304	0.885913	2.03538	3.41351	2.03538	2.03538		0.0561394	-0.0808728	-0.0430498	0.0628801	0.0430224	-0.0788214	0.0578976	0.0239916	0.25624	-0.0896593	-0.0982581	-0.355317	0.163756	0.438057	-0.287689	-0.538667	-0.257699	-0.102252	0.334151	-0.0228564	-0.0464521	-0.155437	0.0396614	-0.000899059	0.133811
109	4.1215	3.08324	3.29132	3.82034	3.29132	3.82034	4.22391	4.1215	1.23065	2.98908	3.27871	4.1215	4.62556	5.86808	4.44423	5.9023	2.95963	5.37609	0.798255	1.79981	3.58598	1.79981	1.79981		0.0397974	-0.0795617	-0.0438306	0.0791706	0.0405112	-0.0830458	0.0546436	0.0754918	0.263053	-0.0527313	-0.0682046	-0.356538	0.114114	0.434437	-0.296508	-0.559179	-0.356817	-0.0445183	0.443254	-0.0198597	-0.0750361	-0.124011	-0.0155145	-0.144557	0.00278475
110	4.1874	3.16855	3.33666	3.6814	3.33666	3.6814	4.07649	4.1874	1.24199	3.15421	3.36035	4.1874	5.08602	5.97853	4.43716	5.66025	2.91498	5.25723	0.844487	1.62708	3.66528	1.62708	1.62708		0.0513418	-0.0896688	-0.0638983	0.057744	0.0812312	-0.0898392	0.0493085	0.0176753	0.184005	-0.100999	-0.0959213	-0.399858	0.105756	0.43654	-0.288586	-0.548938	-0.259667	-0.0835847	0.269693	-0.0308653	-0.0965093	-0.0430285	-0.0460854	-0.0941035	0.214049
111	4.03787	3.1048	3.3516	3.94993	3.3516	3.94993	4.25127	4.03787	1.3135	3.03481	3.40668	4.03787	5.21973	6.2472	4.44988	5.6305	2.9432	5.32156	0.780851	1.34514	3.59686	1.34514	1.34514		0.0532575	-0.0657121	-0.102918	0.0330602	0.080941	-0.0890395	0.0639608	0.0566904	0.257125	-0.132595	-0.0583431	-0.340442	0.076218	0.380012	-0.30348	-0.589172	-0.280776	-0.00873851	0.415073	-0.0224754	-0.0660378	-0.0623636	-0.0260314	-0.0795394	-0.0266138
112	4.05704	3.20951	3.3243	3.91172	3.3243	3.91172	3.99605	4.05704	1.25865	3.21662	3.28353	4.05704	4.94589	5.71395	4.46939	5.92304	2.97541	5.34731	0.800896	1.81757	3.47541	1.81757	1.81757		0.0201825	-0.125552	-0.0442873	0.0131953	0.0738976	-0.0881647	0.0562799	0.0359292	0.170897	-0.109409	-0.0831192	-0.297995	0.0939008	0.36761	-0.300395	-0.568027	-0.412687	-0.0470978	0.389066	-0.0121679	-0.108485	-0.123026	0.0226172	-0.0956626	0.0836124
113	3.92301	3.13532	3.36691	3.86175	3.36691	3.86175	4.17203	3.92301	1.28807	3.32603	3.39792	3.92301	4.92628	6.01423	4.49589	6.13814	2.95351	5.5379	0.802678	1.45875	3.90699	1.45875	1.45875		-0.00102981	-0.0837015	-0.0710099	0.037448	0.106143	-0.0876462	0.0740207	0.0390946	0.245728	-0.0470826	-0.0567066	-0.30432	0.099687	0.40986	-0.293742	-0.566354	-0.380054	-0.0322655	0.34827	-0.000642162	-0.14912	-0.0828959	0.0277573	-0.110294	0.0788622
114	4.18951	3.22693	3.36961	3.93587	3.36961	3.93587	3.83665	4.18951	1.28831	3.35369	3.44448	4.18951	5.23806	6.24136	4.65076	5.93136	2.93754	5.08739	0.824171	1.91204	3.52691	1.91204	1.91204		0.0378202	-0.0524108	-0.100123	0.0222961	0.0656335	-0.0946375	0.0664204	0.0440871	0.12103	-0.0771606	-0.10052	-0.31937	0.0924151	0.354132	-0.314893	-0.605537	-0.35481	-0.0529499	0.387728	-0.0424424	-0.135612	-0.0720028	0.106206	-0.144512	0.00596169
115	4.13059	3.09313	3.33723	3.62037	3.33723	3.62037	4.04481	4.13059	1.32712	3.22228	3.39591	4.13059	4.83015	6.16837	4.60371	6.10947	2.96718	5.41442	0.79474	1.93496	3.33687	1.93496	1.93496		-0.000404276	-0.0635111	-0.043838	0.0240976	0.0917764	-0.0862882	0.0606311	0.0396937	0.193813	-0.0725018	-0.0540848	-0.325958	0.0774958	0.323792	-0.328487	-0.568481	-0.307161	-0.0699375	0.378584	-0.0116114	-0.118757	-0.125855	-0.0317825	-0.171851	0.0663755
116	4.14305	3.14963	3.40387	3.65902	3.40387	3.65902	4.1867	4.14305	1.2071	3.16674	3.26058	4.14305	5.0527	5.82672	4.47018	5.99117	2.99414	5.55903	0.819303	1.82179	2.95016	1.82179	1.82179		0.0252482	0.0190065	-0.00724167	-0.0745075	0.0881546	-0.0869453	0.0575379	0.0557806	0.163227	-0.0991863	-0.0687347	-0.285037	0.150841	0.356294	-0.312486	-0.584438	-0.270045	-0.0195912	0.298259	-0.0601547	-0.124388	-0.138009	0.0820662	-0.12581	0.0540535
117	3.89916	3.16953	3.35437	3.99105	3.35437	3.99105	3.99633	3.89916	1.20359	3.23209	3.35594	3.89916	5.20016	5.76968	4.51354	5.81356	2.97589	5.43726	0.766517	1.70776	3.42754	1.70776	1.70776		0.0158763	-0.12819	-0.072553	0.0697606	0.0805108	-0.0856664	0.0786039	0.0564614	0.255933	-0.123109	-0.0746295	-0.405267	0.156926	0.343057	-0.343218	-0.598342	-0.295797	0.028085	0.361442	-0.00362136	-0.07047	-0.144653	0.04304	-0.13924	0.0634629
118	4.04782	3.15228	3.31412	3.82919	3.31412	3.82919	3.83588	4.04782	1.33779	3.26835	3.26232	4.04782	5.14675	5.52467	4.37429	5.86703	2.94894	5.38039	0.822548	1.85265	3.7901	1.85265	1.85265		0.0200987	-0.0813813	-0.00189788	-0.0791149	0.104293	-0.0926224	0.055107	0.0666753	0.319856	-0.0427612	-0.0568559	-0.352656	0.144378	0.337012	-0.318398	-0.587615	-0.329533	-0.101192	0.382051	-0.00964619	-0.180622	-0.0896156	-0.0371373	-0.0788547	0.00199593
119	3.89565	3.16021	3.33022	3.87926	3.33022	3.87926	4.32284	3.89565	1.21091	3.10121	3.34804	3.89565	4.93148	5.71905	4.62904	6.26171	3.00188	5.47926	0.777748	1.68259	3.49809	1.68259	1.68259		0.0127431	-0.0881591	-0.12605	0.0392942	0.124853	-0.0825032	0.0716798	0.0516979	0.270784	-0.0492118	-0.0682385	-0.262615	0.154999	0.23453	-0.315851	-0.614177	-0.344863	-0.0912215	0.424365	-0.0115312	-0.147803	-0.072291	-0.0239382	-0.0304441	0.00157119
120	4.04986	3.1997	3.3342	3.93842	3.3342	3.93842	4.2783	4.04986	1.18495	3.0907	3.41639	4.04986	5.28132	6.14389	4.56453	5.77157	3.06902	5.53151	0.763002	2.27827	2.76083	2.27827	2.27827		0.0473764	-0.109128	-0.0210854	-0.0290763	0.076679	-0.0885722	0.0531819	0.0674741	0.311698	-0.0587805	-0.0744124	-0.247869	0.150472	0.26054	-0.337523	-0.607227	-0.345689	-0.0199985	0.361492	-0.0317364	-0.0976646	-0.131595	0.0289739	-0.13502	0.127249
121	3.98891	3.15226	3.3275	3.98308	3.3275	3.98308	3.8934	3.98891	1.1628	3.47655	3.40777	3.98891	5.07673	5.78814	4.37776	5.91702	3.03422	5.53442	0.809901	2.01262	3.06797	2.01262	2.01262		0.0271806	0.00364714	-0.0423317	-0.0249772	0.121141	-0.0915969	0.0529218	0.0963418	0.266903	-0.0469139	-0.117512	-0.214977	0.119799	0.287066	-0.34864	-0.606885	-0.337589	-0.0263795	0.345311	-0.0259422	-0.107103	-0.129004	-0.0314935	-0.107339	0.0224791
122	4.02374	3.13195	3.30451	3.76658	3.30451	3.76658	3.9949	4.02374	1.22216	3.5344	3.47937	4.02374	4.97237	5.82385	4.45395	6.13979	3.07777	5.62665	0.794278	1.68561	3.06384	1.68561	1.68561		0.023796	-0.0601659	-0.0425895	0.0708627	0.0601208	-0.10503	0.0484146	0.0698634	0.258958	-0.0190708	-0.0423214	-0.340571	0.160491	0.265877	-0.339696	-0.612204	-0.300633	-0.0317535	0.427984	0.0119138	-0.15946	-0.0431185	-0.0697917	-0.0740099	-0.00105531
123	3.9682	3.1346	3.33553	3.77731	3.33553	3.77731	3.8859	3.9682	1.12316	3.54619	3.4437	3.9682	4.98772	5.92029	4.53422	6.44274	3.04605	5.30176	0.74679	2.05296	3.30913	2.05296	2.05296		0.0295599	-0.0767807	-0.0344872	-0.00410375	0.0376498	-0.0906508	0.0667892	0.106741	0.323767	-0.0451221	-0.0431566	-0.328969	0.129333	0.21479	-0.316747	-0.606253	-0.242679	-0.0190086	0.424019	-0.0114009	-0.163531	-0.0976358	0.0352975	-0.0280254	0.0954013
124	3.95711	3.23768	3.3806	4.11518	3.3806	4.11518	4.07392	3.95711	1.23534	3.62846	3.37961	3.95711	5.37058	6.28457	4.63021	6.15571	3.00147	5.60729	0.73559	1.86334	3.32469	1.86334	1.86334		0.0107939	-0.0505594	0.00605334	-0.0251358	0.106594	-0.108652	0.0636723	0.0467054	0.252848	-0.0852332	-0.0816998	-0.402258	0.106357	0.261457	-0.355044	-0.59486	-0.280385	-0.0384541	0.445566	-0.0659301	-0.0925425	-0.139749	-0.057845	-0.114915	0.115941
125	3.90063	3.19736	3.33338	3.60192	3.33338	3.60192	3.92081	3.90063	1.22599	3.36651	3.42412	3.90063	5.35941	6.53441	4.58992	6.23291	3.05688	5.55378	0.814132	1.47236	3.92804	1.47236	1.47236		0.0187024	-0.113181	-0.0788064	0.098454	0.0870641	-0.101558	0.0601487	0.0704847	0.263542	0.000657989	-0.0847492	-0.327048	0.1247	0.278475	-0.333597	-0.610856	-0.302325	-0.0414749	0.455375	-0.0527412	-0.117874	-0.0933471	-0.0681472	-0.107469	-0.121098
126	3.93269	3.1967	3.35029	3.72916	3.35029	3.72916	3.77372	3.93269	1.10002	3.55918	3.38145	3.93269	4.95522	6.7198	4.70422	6.24077	3.11574	5.64113	0.797094	1.74379	3.13215	1.74379	1.74379		0.0224333	-0.0897244	-0.10687	-0.0205772	0.124753	-0.100421	0.0509118	0.0726295	0.240289	-0.0650613	-0.0750709	-0.255156	0.127555	0.191744	-0.350549	-0.611795	-0.315025	-0.0563978	0.372095	-0.0423873	-0.0377383	-0.250999	-0.0257795	-0.0798966	0.218504
127	3.98737	3.17954	3.39403	4.01608	3.39403	4.01608	3.88306	3.98737	1.07197	3.45375	3.41856	3.98737	5.49909	6.3608	4.39282	6.3807	3.09084	5.48008	0.846952	2.25965	3.36744	2.25965	2.25965		0.0353181	-0.0997521	-0.0600976	0.0814194	0.0608312	-0.11298	0.0588955	0.098021	0.342101	0.0493051	-0.14235	-0.291407	0.150464	0.229414	-0.347954	-0.62932	-0.273817	-0.055849	0.467725	0.00771138	-0.121273	-0.157305	-0.0507342	-0.133554	-0.0622276
128	3.7839	3.15999	3.31462	3.91088	3.31462	3.91088	3.94314	3.7839	1.09884	3.75306	3.39628	3.7839	5.22251	6.72554	4.62143	6.79231	3.09012	5.55441	0.788694	1.26705	3.11752	1.26705	1.26705		0.0523862	-0.0952865	-0.110092	-0.0563708	0.080891	-0.104285	0.0654979	0.101416	0.360832	0.0322116	-0.0760222	-0.248045	0.123731	0.237605	-0.376404	-0.625648	-0.395268	-0.0178772	0.468416	-0.0643509	-0.0388432	-0.130188	-0.0752374	-0.14638	-0.0881762
129	3.92698	3.16664	3.33893	3.84621	3.33893	3.84621	4.18199	3.92698	1.20461	3.52332	3.49493	3.92698	5.38098	6.54804	4.82152	6.54474	3.09545	5.43068	0.800069	1.8205	3.40029	1.8205	1.8205		0.00293004	-0.142262	-0.0910739	-0.1034	0.124272	-0.108403	0.0670637	0.100972	0.383565	0.0226207	-0.0706497	-0.351565	0.182516	0.205374	-0.367547	-0.643742	-0.348876	-0.004213	0.437887	-0.0588938	-0.198329	-0.0999587	-0.0299247	-0.0936458	0.0922157
130	4.05013	3.26287	3.33925	4.02199	3.33925	4.02199	3.61153	4.05013	1.1412	3.68948	3.51587	4.05013	5.54198	6.66035	4.57103	6.53668	3.13852	5.65062	0.807324	1.26309	3.40785	1.26309	1.26309		0.0608309	-0.105473	-0.0875016	0.00677421	0.0770992	-0.103058	0.072219	0.0839311	0.264397	0.00792976	-0.0952289	-0.349864	0.152092	0.201389	-0.363239	-0.627229	-0.333266	-0.0457176	0.412378	-0.0111176	-0.128695	-0.105528	-0.0773897	-0.115927	0.00351722
131	3.97775	3.11621	3.30554	3.77878	3.30554	3.77878	3.62319	3.97775	1.11337	3.64936	3.51334	3.97775	5.39718	6.16197	4.53308	6.431	3.10868	5.65644	0.836977	2.22431	3.55253	2.22431	2.22431		0.0125699	-0.144567	0.0171166	0.0199172	0.0553585	-0.105441	0.0535604	0.114603	0.275428	0.0792561	-0.058941	-0.325128	0.1377	0.173269	-0.383875	-0.629569	-0.276298	0.0268122	0.469804	-0.0285391	-0.174242	-0.267583	-0.0841111	-0.125003	0.132021
132	3.98978	3.15139	3.3141	3.81768	3.3141	3.81768	3.69903	3.98978	1.108	3.81841	3.50993	3.98978	5.16779	6.744	4.57163	6.26887	3.09574	5.45902	0.850388	1.7718	3.45104	1.7718	1.7718		0.0380492	-0.0494549	-0.130344	0.0608468	0.0711662	-0.0924839	0.0633035	0.114004	0.343782	0.0899427	-0.086556	-0.301223	0.180136	0.199311	-0.389858	-0.631714	-0.224399	-0.0522258	0.421297	0.00347507	-0.188407	-0.154579	-0.0289283	-0.0966673	-0.00498639
133	3.92448	3.1437	3.29645	3.89333	3.29645	3.89333	3.97663	3.92448	1.06701	3.93521	3.5677	3.92448	5.24723	6.32992	4.70722	6.70731	3.11838	5.52601	0.824187	1.15724	3.45746	1.15724	1.15724		0.0264601	-0.0980676	-0.0751089	-0.0148109	0.117589	-0.103949	0.0645945	0.109877	0.323798	0.0592325	-0.045215	-0.33621	0.156034	0.182414	-0.379567	-0.621338	-0.257738	0.00234616	0.395524	-0.0490601	-0.147722	-0.124472	-0.0618125	-0.136092	0.070935
134	4.00784	3.29394	3.38015	4.15989	3.38015	4.15989	3.69476	4.00784	1.07849	3.72257	3.58275	4.00784	5.5216	6.53775	4.46782	6.82238	3.11465	5.50305	0.788376	1.26929	3.49058	1.26929	1.26929		-2.14812e-06	-0.121675	-0.0717869	-0.0298001	0.0467242	-0.111855	0.0572305	0.113464	0.372901	0.0857066	-0.0959422	-0.317452	0.128382	0.216935	-0.373452	-0.641572	-0.280975	0.0308597	0.427338	-0.0114222	-0.126561	-0.118936	-0.149391	-0.126506	0.0403879
135	4.04585	3.19276	3.31946	4.21625	3.31946	4.21625	4.05679	4.04585	1.10636	3.60894	3.50675	4.04585	5.35802	6.19694	4.75966	6.86006	3.15629	5.74348	0.826573	1.49521	3.3626	1.49521	1.49521		0.0357705	-0.124893	-0.108726	-0.000334081	0.0912961	-0.108114	0.0528699	0.129159	0.350045	0.124278	-0.114755	-0.296774	0.181122	0.202589	-0.415059	-0.631996	-0.218581	-0.0225272	0.451081	-0.0267719	-0.0848987	-0.0802394	0.0167808	-0.101173	0.0543482
136	3.81964	3.25049	3.33909	3.81006	3.33909	3.81006	3.81734	3.81964	1.09381	3.57378	3.41453	3.81964	5.33657	6.37499	4.73182	6.36871	3.12541	5.58022	0.864484	2.3193	3.09076	2.3193	2.3193		0.0488173	-0.0703843	-0.124415	0.0162045	0.0371395	-0.111926	0.0534136	0.137369	0.256148	0.0752935	-0.0737878	-0.320375	0.209332	0.134594	-0.420457	-0.650667	-0.244057	0.00816426	0.439162	-0.046774	-0.16678	-0.0725529	-0.030043	-0.109527	-0.00493871
137	3.87241	3.18788	3.42308	3.85737	3.42308	3.85737	3.76748	3.87241	1.03278	3.49895	3.55829	3.87241	5.05897	5.94042	4.49926	6.40532	3.17497	5.63063	0.712045	1.06424	2.97083	1.06424	1.06424		0.0436846	-0.0891523	-0.0133404	0.0728837	0.0901156	-0.102429	0.0673	0.0914234	0.452621	0.0828823	-0.0616435	-0.362908	0.168022	0.20899	-0.399993	-0.645579	-0.285182	0.0201484	0.534559	-0.050885	-0.0906109	-0.132614	-0.0800031	-0.190102	0.0517434
138	3.98476	3.21524	3.29352	4.09354	3.29352	4.09354	3.73558	3.98476	1.06653	3.89393	3.49965	3.98476	5.19444	6.54322	4.52168	6.63405	3.08672	5.60065	0.728336	1.7749	3.34514	1.7749	1.7749		0.0374014	-0.119362	0.00307393	0.0902884	0.127944	-0.109214	0.0607968	0.121534	0.380998	0.114288	-0.102489	-0.39423	0.118046	0.157469	-0.4202	-0.65655	-0.240638	-0.00449585	0.504941	-0.0447398	-0.0969315	-0.072566	-0.0828312	-0.095097	0.0261849
139	3.9519	3.12958	3.27476	3.82885	3.27476	3.82885	3.80502	3.9519	1.06723	3.71379	3.47404	3.9519	5.03142	6.17449	4.63036	7.07287	3.14772	5.5243	0.827861	1.97668	3.03914	1.97668	1.97668		0.0255888	-0.11001	-0.0611951	0.0639821	0.0495856	-0.108684	0.0582285	0.130306	0.313195	0.108407	-0.0758044	-0.314179	0.0982678	0.150881	-0.412995	-0.646911	-0.234462	-0.0732072	0.4877	0.0215032	-0.151052	-0.0130239	-0.0432311	-0.0317836	-0.0791264
140	3.94221	3.3093	3.3264	3.8527	3.3264	3.8527	4.00979	3.94221	1.02684	3.48752	3.5063	3.94221	5.28046	6.0875	4.68843	7.02885	3.13387	5.59065	0.898274	1.05355	3.04632	1.05355	1.05355		-0.00528567	-0.119418	-0.0761585	0.0655802	0.115378	-0.112366	0.0643961	0.131615	0.336754	0.227917	-0.109043	-0.317538	0.148812	0.147279	-0.418985	-0.642579	-0.255421	-0.0323899	0.477236	0.00850976	-0.149788	-0.0331851	0.0234897	-0.0732657	0.130664
141	3.88326	3.1742	3.32203	3.73943	3.32203	3.73943	3.79348	3.88326	1.13175	3.70184	3.45277	3.88326	5.36813	6.59293	4.60394	6.66507	3.17065	5.76916	0.862893	2.06227	3.03202	2.06227	2.06227		0.0488955	-0.139005	-0.064053	-0.00939837	0.101341	-0.108965	0.0591413	0.134544	0.325998	0.170796	-0.0854893	-0.318061	0.151383	0.146419	-0.414701	-0.662742	-0.284394	0.0111143	0.504725	-0.00144556	-0.164972	-0.191599	-0.0531494	-0.147954	0.00103809
142	3.93069	3.22363	3.31313	3.95087	3.31313	3.95087	4.06971	3.93069	1.06374	3.9034	3.5836	3.93069	5.49561	6.22234	4.57965	6.98241	3.18541	5.65638	0.814212	2.09632	2.9934	2.09632	2.09632		0.0308389	-0.123812	-0.118577	-0.00265607	0.134147	-0.110362	0.0584034	0.14742	0.44541	0.159414	-0.112453	-0.316535	0.200466	0.0827913	-0.439847	-0.648231	-0.231005	-0.0334167	0.5922	-0.0508875	-0.157226	-0.0707165	-0.111447	-0.0638813	0.0543309
143	3.96195	3.19539	3.34917	3.98225	3.34917	3.98225	3.85958	3.96195	1.1353	3.79081	3.58504	3.96195	5.26176	6.9828	4.64599	6.42523	3.20027	5.58819	0.844216	1.82386	3.34743	1.82386	1.82386		0.0112295	-0.0723469	-0.017038	0.0346665	0.0221822	-0.114318	0.0612508	0.13447	0.297092	0.163039	-0.0850889	-0.361293	0.193796	0.210303	-0.443493	-0.654393	-0.238394	-0.0011696	0.50195	-0.0627303	-0.126529	-0.0720533	-0.00435489	-0.157551	0.0407563
144	3.97027	3.24499	3.30726	3.99671	3.30726	3.99671	3.74604	3.97027	1.08965	4.13856	3.54248	3.97027	5.34165	6.56436	4.82329	6.13332	3.18862	5.57667	0.810743	1.41591	3.42243	1.41591	1.41591		0.0413891	-0.112068	-0.0457457	0.0490254	0.14011	-0.126167	0.0634406	0.170682	0.422371	0.209453	-0.130159	-0.393576	0.136355	0.145865	-0.43363	-0.649824	-0.305193	0.0333006	0.518364	-0.0264498	-0.105698	-0.109732	-0.0395952	-0.228905	0.0288113
145	3.87097	3.24525	3.32093	4.16083	3.32093	4.16083	3.7503	3.87097	1.13139	4.46956	3.59966	3.87097	5.32143	6.28077	4.70924	6.79408	3.14898	5.70154	0.72797	1.30989	3.31762	1.30989	1.30989		0.0514312	-0.147364	-0.0184669	0.0761817	0.116599	-0.128277	0.0581198	0.142458	0.419162	0.220392	-0.0727961	-0.430265	0.119198	0.15294	-0.441172	-0.650132	-0.160429	-0.0144463	0.468515	-0.00255477	-0.190301	-0.123486	-0.0614217	-0.123968	0.0897279
146	3.74546	3.22119	3.26149	3.91767	3.26149	3.91767	3.87868	3.74546	1.13379	3.99601	3.5879	3.74546	5.45194	7.10003	4.72376	6.47858	3.13927	5.59546	0.780406	1.75637	2.72548	1.75637	1.75637		0.0332851	-0.0632092	-0.0854318	-0.0135218	0.127354	-0.123301	0.0576939	0.157243	0.474224	0.241069	-0.0481014	-0.349427	0.179678	0.103752	-0.442683	-0.649082	-0.276414	0.0963579	0.59083	-0.0317226	-0.143265	-0.199708	-0.0550554	-0.144583	-0.0445009
147	3.94505	3.32369	3.39672	3.98933	3.39672	3.98933	3.8152	3.94505	1.07103	3.92389	3.72212	3.94505	5.46582	6.61853	4.66614	6.703	3.21052	5.65986	0.756908	1.76465	3.50015	1.76465	1.76465		0.0380827	-0.191066	-0.0339937	0.021434	0.0948879	-0.131373	0.065025	0.134211	0.289729	0.12763	-0.0808985	-0.274611	0.156935	0.117755	-0.458637	-0.683596	-0.214175	0.0261051	0.564643	-0.00512788	-0.138858	-0.137286	-0.111324	-0.0824455	0.0645118
148	3.82919	3.27804	3.33752	4.00969	3.33752	4.00969	3.81432	3.82919	1.0075	3.86963	3.61481	3.82919	6.01702	6.91798	4.8764	7.31169	3.19064	5.45579	0.79991	1.31386	3.27944	1.31386	1.31386		0.042696	-0.0946985	-0.0801359	0.129839	0.116308	-0.125118	0.0561144	0.135979	0.30357	0.212889	-0.0855845	-0.331978	0.24039	0.128993	-0.451634	-0.66055	-0.348992	-0.0266454	0.513245	-0.0134714	-0.176068	-0.0962848	-0.163877	-0.172788	0.0386369
149	4.019	3.32458	3.36034	3.91993	3.36034	3.91993	3.6222	4.019	1.09525	3.89607	3.5997	4.019	5.86121	6.53478	4.59734	6.8527	3.14616	5.69775	0.781726	1.40944	3.17697	1.40944	1.40944		0.0238798	-0.132076	-0.0453663	0.0809598	0.0430824	-0.126099	0.065134	0.151074	0.3168	0.169194	-0.0998203	-0.330407	0.153713	0.136511	-0.452693	-0.650932	-0.199353	0.0039018	0.565106	-0.0235533	-0.116926	-0.146451	-0.0823812	-0.122655	0.117432
150	3.9708	3.25933	3.32059	4.07245	3.32059	4.07245	3.37098	3.9708	1.06032	4.25334	3.67495	3.9708	5.79147	6.75643	4.70321	6.58952	3.18593	5.88245	0.771496	1.60458	2.90681	1.60458	1.60458		0.0205176	-0.114484	-0.0258326	0.0141631	0.0825318	-0.13146	0.0498854	0.158774	0.326854	0.261683	-0.0629821	-0.33743	0.189454	0.0324703	-0.4838	-0.673417	-0.338614	0.0513857	0.522788	-0.0441482	-0.116248	-0.101783	0.00180773	-0.150574	0.127994
151	3.9507	3.29691	3.24306	4.09276	3.24306	4.09276	3.47965	3.9507	1.17608	4.08602	3.68343	3.9507	5.59081	6.40495	4.76835	6.82891	3.24471	5.95153	0.783555	1.72974	2.69546	1.72974	1.72974		0.0275045	-0.0680641	-0.0474582	0.0295793	0.129395	-0.126602	0.0570935	0.182649	0.500227	0.18319	-0.05581	-0.32718	0.243554	0.0405493	-0.467775	-0.680679	-0.161294	0.059393	0.474079	-0.0489949	-0.143181	-0.156615	-0.0594138	-0.123116	0.0458056
152	3.75367	3.25683	3.36621	4.08617	3.36621	4.08617	3.67922	3.75367	1.06891	4.25611	3.60682	3.75367	5.5094	6.69513	4.88783	6.7167	3.20447	5.53613	0.770446	1.36419	2.98166	1.36419	1.36419		0.0431764	-0.143836	-0.0597515	0.0135856	0.10004	-0.133958	0.072389	0.148745	0.466921	0.241132	-0.077068	-0.37953	0.262297	0.0456155	-0.469248	-0.657984	-0.237021	-0.0450302	0.446658	-0.0243479	-0.169863	0.0286162	-0.0302357	-0.173897	0.0672293
153	3.8841	3.25659	3.32901	4.07373	3.32901	4.07373	3.70012	3.8841	0.986927	4.0911	3.69462	3.8841	5.58602	6.42331	4.7303	6.95304	3.24886	5.8488	0.755269	1.80757	3.35542	1.80757	1.80757		0.0594961	-0.0756206	-0.112762	0.0688294	0.132807	-0.134267	0.0600071	0.17063	0.473582	0.26398	-0.0760698	-0.370934	0.23695	0.0354583	-0.478619	-0.687031	-0.351628	0.00892228	0.571923	-0.0762013	-0.161193	-0.149133	-0.156878	-0.104463	0.0543092
154	3.84849	3.29398	3.32323	4.09659	3.32323	4.09659	3.59074	3.84849	1.08453	4.23747	3.70318	3.84849	6.10173	6.28995	4.70071	6.70959	3.22631	5.64879	0.762412	1.55227	3.37984	1.55227	1.55227		0.0230364	-0.129708	-0.0613572	0.0119794	0.0694954	-0.127671	0.0544967	0.172634	0.484155	0.193687	-0.0456766	-0.299565	0.242594	0.0583505	-0.462338	-0.669726	-0.21964	0.0429343	0.54998	-0.0510943	-0.128031	-0.10652	-0.0970639	-0.202438	0.0503868
155	3.7161	3.23155	3.34278	4.0479	3.34278	4.0479	3.7375	3.7161	1.10119	4.35813	3.72147	3.7161	5.4666	7.00293	4.77542	6.58248	3.19513	5.78213	0.735495	1.27757	3.32828	1.27757	1.27757		0.0284093	-0.129239	-0.0373856	0.0174936	0.0819515	-0.124698	0.0616339	0.182183	0.451307	0.18241	-0.0908892	-0.40012	0.182734	0.0533017	-0.456884	-0.677838	-0.191253	-0.00518316	0.57473	-0.0509301	-0.138742	-0.215689	-0.13805	-0.143057	-0.00172711
156	3.93831	3.30725	3.35231	3.92741	3.35231	3.92741	3.39604	3.93831	1.06305	4.4254	3.66757	3.93831	5.58671	6.92967	4.75537	6.77563	3.20999	5.583	0.840604	1.48719	2.70775	1.48719	1.48719		0.0291019	-0.171416	-0.0416209	0.0308399	0.102181	-0.130573	0.0432968	0.177398	0.466646	0.234008	-0.0532425	-0.376912	0.233019	0.0219477	-0.449717	-0.670442	-0.232301	-0.0571218	0.496435	-0.0784535	-0.191084	-0.131026	-0.0871952	-0.175974	0.0216037
157	3.90678	3.35087	3.32472	4.11125	3.32472	4.11125	3.85159	3.90678	1.13119	4.39261	3.70589	3.90678	5.81296	7.20872	4.50896	6.96421	3.23612	5.54985	0.725981	1.91428	3.12927	1.91428	1.91428		0.0399035	-0.124162	-0.123022	0.0518069	0.0682248	-0.13167	0.0547712	0.166621	0.419284	0.188607	-0.0879688	-0.312391	0.243612	0.0616964	-0.48038	-0.672823	-0.211699	0.0367824	0.490871	-0.0623581	-0.111554	-0.109694	-0.073952	-0.159731	0.0730761
158	3.71396	3.3	3.29562	4.01741	3.29562	4.01741	3.60157	3.71396	1.05713	4.09659	3.69829	3.71396	5.41707	6.5396	4.64508	6.59288	3.20906	5.59837	0.765165	2.28111	3.04997	2.28111	2.28111		0.0233827	-0.111035	-0.0504486	-0.0309388	0.123782	-0.137042	0.0569988	0.186414	0.466494	0.27924	-0.0281338	-0.291842	0.27331	0.01364	-0.476025	-0.679558	-0.268551	0.0320448	0.498088	-0.0326037	-0.139775	-0.073641	-0.0656315	-0.124675	0.16031
159	3.72936	3.27864	3.31773	4.04987	3.31773	4.04987	3.66817	3.72936	1.03812	4.37927	3.71839	3.72936	5.63219	6.46569	4.62212	6.67439	3.25446	5.92439	0.729338	1.46599	3.51402	1.46599	1.46599		0.0101907	-0.122374	-0.0553726	-0.0273317	0.126613	-0.132149	0.0460923	0.167361	0.458671	0.231078	-0.0612295	-0.313088	0.197769	0.0186962	-0.466677	-0.674782	-0.258995	0.0384625	0.626079	-0.0743877	-0.206603	-0.17106	-0.0936633	-0.104574	0.0741856
160	3.67842	3.35175	3.32988	4.22329	3.32988	4.22329	3.70543	3.67842	1.06542	4.28337	3.69687	3.67842	5.68351	7.18961	4.65272	6.96123	3.23612	5.9421	0.776794	2.22888	3.05475	2.22888	2.22888		0.0387976	-0.0810555	-0.0608858	0.0804678	0.147734	-0.133404	0.0679765	0.166888	0.436915	0.204289	-0.0626013	-0.31335	0.215394	-0.0138063	-0.472153	-0.683786	-0.257187	-0.00373499	0.595123	-0.0764394	-0.10532	-0.140787	-0.0340216	-0.149766	0.126906
161	3.86129	3.26482	3.32943	3.94639	3.32943	3.94639	3.50833	3.86129	1.03997	4.39052	3.702	3.86129	5.75427	6.72722	4.60861	6.94658	3.20605	5.81028	0.817155	2.02366	3.08456	2.02366	2.02366		0.0592782	-0.18277	-0.0174873	0.0394569	0.0559688	-0.135981	0.0481685	0.179594	0.529193	0.233397	-0.0871062	-0.356146	0.210209	0.037969	-0.468865	-0.672313	-0.240793	-0.0108061	0.455307	-0.0318642	-0.131639	-0.108036	-0.119061	-0.110446	0.0298299
162	3.80771	3.33559	3.39136	4.09595	3.39136	4.09595	3.61919	3.80771	1.05602	4.51633	3.79586	3.80771	5.59167	6.62168	4.77504	6.8277	3.20253	6.05799	0.771242	1.66768	3.47611	1.66768	1.66768		0.0500963	-0.100277	-0.0776095	0.0309334	0.0900755	-0.126895	0.0550407	0.213366	0.52953	0.313007	-0.0473405	-0.359811	0.231899	-0.0143855	-0.502122	-0.681754	-0.218305	0.0980889	0.569264	-0.0209313	-0.10091	-0.100081	-0.119105	-0.118223	0.103567
163	3.72388	3.27824	3.35699	3.95707	3.35699	3.95707	3.66165	3.72388	1.04464	4.18614	3.69734	3.72388	5.68052	6.5983	4.73781	6.93136	3.25671	5.82451	0.816296	2.13476	2.71455	2.13476	2.13476		0.0250303	-0.122398	-0.0924403	0.0633843	0.147564	-0.124041	0.052397	0.174912	0.418337	0.258015	-0.0626489	-0.322511	0.232241	0.0141322	-0.489915	-0.676971	-0.197975	-0.0147659	0.54341	-0.0712806	-0.138648	-0.0187394	-0.0773842	-0.148565	0.108876
164	3.85581	3.34212	3.30514	4.18807	3.30514	4.18807	3.59216	3.85581	1.04082	4.20479	3.6054	3.85581	6.05041	6.59683	4.4166	6.92107	3.26871	5.93192	0.793006	1.55701	2.42612	1.55701	1.55701		0.0529671	-0.120459	0.000356007	0.0685081	0.147264	-0.133249	0.0495212	0.163848	0.474988	0.336044	-0.0154399	-0.345503	0.236224	0.0218383	-0.487578	-0.678394	-0.203715	0.0100706	0.496323	-0.030285	-0.199243	-0.130252	-0.108433	-0.0203489	0.0818571
165	3.78363	3.32161	3.31415	4.15325	3.31415	4.15325	3.52808	3.78363	0.969367	4.68128	3.80874	3.78363	5.98035	6.66323	4.81208	7.5833	3.26729	6.0461	0.754665	1.77042	3.04306	1.77042	1.77042		0.0452093	-0.115699	-0.0519696	0.0131627	0.126173	-0.134073	0.0530118	0.178034	0.46414	0.283393	-0.0658346	-0.364348	0.255869	0.0321297	-0.50604	-0.671849	-0.258681	0.000403017	0.523201	-0.0362171	-0.188964	-0.135046	-0.164048	-0.197898	0.00642544
166	3.84282	3.34221	3.36181	4.25319	3.36181	4.25319	3.50296	3.84282	1.01578	4.59347	3.66984	3.84282	5.91163	7.08843	4.53583	7.25276	3.26671	6.25105	0.770987	1.43642	2.88082	1.43642	1.43642		0.0273817	-0.150161	-0.071717	0.0919435	0.0555586	-0.12608	0.0602956	0.164484	0.486507	0.260271	-0.0358763	-0.262267	0.240633	0.00589159	-0.482818	-0.682584	-0.241857	0.0321155	0.581417	-0.00179649	-0.176805	-0.0897886	-0.12606	-0.187059	-0.036591
167	3.88306	3.31532	3.3316	4.23878	3.3316	4.23878	3.40879	3.88306	0.965567	4.52719	3.69768	3.88306	5.75537	7.09215	4.91034	6.87268	3.31166	6.21176	0.742909	1.46573	2.86069	1.46573	1.46573		0.0208247	-0.0644726	-0.11555	0.0437999	0.132807	-0.13184	0.0540806	0.214157	0.401531	0.272011	-0.0485154	-0.340442	0.241701	-0.00349001	-0.492711	-0.689871	-0.248579	0.0164007	0.573127	-0.0408357	-0.156858	-0.08479	-0.0462629	-0.149528	-0.0201559
168	3.82628	3.29958	3.35827	4.14873	3.35827	4.14873	3.51495	3.82628	1.04378	4.4735	3.71392	3.82628	5.65351	7.16828	4.85234	7.12311	3.27651	5.7987	0.736879	1.7175	3.00341	1.7175	1.7175		0.0493591	-0.0887233	-0.110331	0.0989949	0.0887749	-0.13045	0.0503394	0.206391	0.459404	0.328014	-0.0579558	-0.352176	0.250618	-0.00108868	-0.524129	-0.687877	-0.167349	0.0528876	0.594409	-0.00845676	-0.112824	-0.0940135	-0.170988	-0.185336	0.0841455
169	3.75464	3.34109	3.26193	4.15438	3.26193	4.15438	3.24955	3.75464	1.09711	4.48827	3.76237	3.75464	5.86154	7.07851	4.44473	6.99611	3.29454	6.15426	0.759994	1.93669	2.84329	1.93669	1.93669		0.0570554	-0.141865	-0.00237665	0.0497045	0.115628	-0.13528	0.0541234	0.204993	0.484001	0.351073	-0.0786093	-0.335774	0.236909	0.0221515	-0.510223	-0.687933	-0.231948	-0.0144463	0.515607	3.33904e-05	-0.0714344	-0.0940065	-0.150291	-0.0429058	-0.0357242
170	3.78276	3.3069	3.32823	4.23544	3.32823	4.23544	3.44179	3.78276	1.04905	4.22944	3.76168	3.78276	5.87463	7.04448	4.53027	6.94854	3.32833	6.04471	0.788105	2.21759	2.69138	2.21759	2.21759		0.0367311	-0.0308458	-0.0369069	0.066052	0.0777495	-0.135494	0.0502731	0.18387	0.473552	0.316927	-0.0517076	-0.43153	0.274036	0.0193848	-0.502137	-0.683659	-0.246417	0.0937925	0.538987	-0.0650941	-0.123258	-0.110814	-0.190195	-0.040636	0.13385
171	3.6987	3.40276	3.33697	4.20908	3.33697	4.20908	3.63243	3.6987	1.07726	4.1583	3.71575	3.6987	5.96156	6.51345	4.44461	7.13706	3.27793	6.07324	0.744722	1.42522	3.27269	1.42522	1.42522		0.0159378	-0.0559069	-0.0170306	-0.00455107	0.0992801	-0.138685	0.0457186	0.196901	0.38329	0.370611	-0.103067	-0.35824	0.258799	0.00679395	-0.497455	-0.679314	-0.21685	-0.0588528	0.592743	-0.0902726	-0.167894	-0.0517394	-0.140224	-0.0842613	0.110332
172	3.73854	3.28575	3.24584	4.22929	3.24584	4.22929	3.66494	3.73854	0.987287	4.37476	3.72337	3.73854	5.98882	6.52384	4.57233	6.92659	3.267	5.70515	0.838027	1.58683	2.8007	1.58683	1.58683		0.0301519	-0.15759	-0.103157	0.0694272	0.0634324	-0.14646	0.0544399	0.184905	0.441774	0.341968	-0.101471	-0.296512	0.24282	0.00387557	-0.512717	-0.668343	-0.222039	0.0227279	0.563422	-0.038448	-0.130393	-0.0995299	-0.119265	-0.151861	-0.0041499
173	3.8358	3.27106	3.34969	4.31974	3.34969	4.31974	3.22039	3.8358	0.930806	4.67696	3.73351	3.8358	5.82618	6.76951	4.64975	7.22643	3.30942	5.81085	0.760615	1.23033	3.34944	1.23033	1.23033		0.031537	-0.103391	-0.115219	0.0607655	0.150205	-0.137604	0.0530967	0.187945	0.519569	0.372446	-0.101274	-0.352873	0.316248	0.0171301	-0.537497	-0.668667	-0.319232	-0.016958	0.624148	-0.0198396	-0.186824	-0.0939367	-0.150617	-0.108322	0.130729
174	3.75651	3.36138	3.33645	4.2404	3.33645	4.2404	3.20567	3.75651	1.00604	4.37644	3.76464	3.75651	6.05029	6.98076	4.68306	7.20531	3.27383	5.9607	0.823105	1.58519	3.35395	1.58519	1.58519		0.0393673	-0.0477783	-0.0894535	0.0434095	0.103682	-0.131115	0.0481401	0.208403	0.490968	0.348923	-0.114877	-0.355623	0.277359	-0.0425999	-0.513075	-0.671268	-0.24323	0.018044	0.485953	-0.0519027	-0.111354	-0.138649	-0.14945	-0.167918	-0.0164329
175	3.58066	3.3565	3.34482	4.22501	3.34482	4.22501	3.32665	3.58066	1.00228	4.45998	3.79785	3.58066	5.8827	7.4198	4.80924	7.55977	3.28573	6.01213	0.75772	1.38858	2.54121	1.38858	1.38858		0.0486609	-0.12123	-0.061405	-0.0230904	0.0879345	-0.141504	0.0473644	0.199025	0.498729	0.364415	-0.0856594	-0.32334	0.277283	0.00958805	-0.525812	-0.658519	-0.0944951	0.0150741	0.550757	-0.0904756	-0.1376	-0.105015	-0.14868	-0.167873	0.0785111
176	3.72912	3.33452	3.34569	4.00148	3.34569	4.00148	3.15078	3.72912	1.02614	4.62049	3.77277	3.72912	6.02942	6.80039	4.56368	7.39053	3.31973	6.00068	0.774122	2.73139	2.94685	2.73139	2.73139		0.0542907	-0.0862759	-0.0557887	-0.0546141	0.102712	-0.135545	0.0594203	0.220363	0.444432	0.426467	-0.109152	-0.375689	0.244799	0.000561929	-0.520655	-0.674808	-0.207255	0.0554332	0.509957	-0.101189	-0.144991	-0.154547	-0.156031	-0.118804	0.0305103
177	3.87374	3.28293	3.26581	4.14976	3.26581	4.14976	3.60556	3.87374	0.955161	4.69439	3.70622	3.87374	5.86853	6.84296	4.67387	7.22111	3.32707	5.99436	0.798605	1.5102	2.7679	1.5102	1.5102		0.0196128	-0.0634714	-0.0540983	0.096616	0.126353	-0.139429	0.0537732	0.212493	0.484124	0.378179	-0.0596406	-0.375122	0.286567	0.0308097	-0.512444	-0.684595	-0.19959	0.00149762	0.631064	-0.100301	-0.182033	0.00158156	-0.165579	-0.113419	0.0853071
178	3.8014	3.31832	3.2641	4.10269	3.2641	4.10269	3.44387	3.8014	0.936317	4.48943	3.78658	3.8014	5.87782	6.71145	4.53112	6.75165	3.3662	6.01225	0.73454	1.60338	2.75833	1.60338	1.60338		0.00991701	-0.102231	-0.0516529	0.0627662	0.00580413	-0.133408	0.060617	0.201288	0.463346	0.293911	-0.117648	-0.368055	0.303833	0.0624198	-0.515646	-0.690592	-0.186456	0.000773543	0.505004	-0.0574249	-0.111279	-0.0630866	-0.120154	-0.154834	0.128839
179	3.70621	3.36931	3.32702	4.16938	3.32702	4.16938	3.14274	3.70621	0.945046	4.61916	3.75196	3.70621	6.1409	6.59237	4.61739	7.37132	3.32827	6.20607	0.798176	2.04658	2.97589	2.04658	2.04658		0.0538383	-0.121937	-0.121347	-0.00127751	0.0643329	-0.148986	0.0528275	0.241708	0.502946	0.384228	-0.0695902	-0.305891	0.272976	0.0320104	-0.523163	-0.695401	-0.211622	0.073357	0.551121	-0.0910058	-0.109485	-0.0737815	-0.15224	-0.121044	0.0952019
180	3.82799	3.36946	3.28753	4.22275	3.28753	4.22275	3.27204	3.82799	0.873163	4.91743	3.80408	3.82799	5.98915	6.59728	4.82259	7.37512	3.29143	6.11878	0.872326	2.90265	2.52881	2.90265	2.90265		0.0535312	-0.113896	-0.0614124	0.0605011	0.0654134	-0.132355	0.0537024	0.197619	0.614505	0.44198	-0.0656846	-0.309511	0.356031	-0.00283374	-0.531218	-0.686887	-0.115217	0.0242864	0.566574	-0.0551413	-0.168899	-0.133202	-0.0172182	-0.177001	0.00145417
181	3.73534	3.39805	3.361	4.23234	3.361	4.23234	3.11587	3.73534	0.94152	4.8549	3.81235	3.73534	6.1567	7.28644	4.78316	7.20462	3.29908	6.11669	0.845902	2.21897	2.88294	2.21897	2.21897		0.0397359	-0.0379732	-0.0234019	0.0726682	0.0821116	-0.130339	0.0461537	0.214275	0.571544	0.386968	-0.0875952	-0.324998	0.299885	-0.0343742	-0.536251	-0.677139	-0.148203	0.0732184	0.542813	-0.102461	-0.183013	-0.0831194	-0.112239	-0.189083	-0.0721311
182	3.81302	3.35464	3.35414	4.21665	3.35414	4.21665	3.42646	3.81302	1.03512	4.74791	3.77622	3.81302	5.91654	7.30192	4.91994	6.85206	3.31569	6.00517	0.836802	1.74551	3.16799	1.74551	1.74551		0.0603618	-0.132219	-0.0450054	0.0002271	0.0641728	-0.135882	0.0547004	0.20929	0.546642	0.519925	-0.0758455	-0.368273	0.249415	-0.0328852	-0.533781	-0.678256	-0.129212	-0.0288374	0.568523	-0.0844633	-0.189833	-0.142662	-0.133434	-0.182147	0.0260375
183	3.84071	3.39958	3.26871	4.29377	3.26871	4.29377	3.31379	3.84071	0.989563	4.62696	3.77751	3.84071	6.16448	7.71878	4.66971	7.29799	3.32024	6.19911	0.829946	2.25233	2.73402	2.25233	2.25233		0.0684099	-0.10974	0.0271781	0.0889668	0.104913	-0.13783	0.0567955	0.267758	0.556999	0.419238	-0.0756212	-0.363082	0.33747	0.0189846	-0.534739	-0.673585	-0.117142	0.0329471	0.577357	-0.0332918	-0.19949	-0.160858	-0.120037	-0.180089	0.109505
184	3.75167	3.35017	3.32634	4.2467	3.32634	4.2467	3.28687	3.75167	0.97089	4.69607	3.77928	3.75167	5.93746	6.30637	4.65745	7.12317	3.34303	5.9533	0.777176	2.10614	2.57808	2.10614	2.10614		0.0348657	-0.0612783	-0.0981081	0.111321	0.126173	-0.131274	0.048755	0.22659	0.487851	0.401828	-0.0982849	-0.372766	0.250834	-0.0523892	-0.51119	-0.68135	-0.223335	0.0702486	0.547816	-0.0513011	-0.0686219	-0.259134	-0.105851	-0.18253	0.111919
185	3.81716	3.35538	3.27816	4.34182	3.27816	4.34182	3.21098	3.81716	0.89507	4.67909	3.83352	3.81716	6.14094	7.18721	4.67653	7.02764	3.31318	6.0523	0.819016	1.78878	2.83584	1.78878	1.78878		0.0622886	-0.0864666	-0.0249524	0.0728756	0.072717	-0.137782	0.0529691	0.218795	0.46026	0.392933	-0.0827456	-0.377304	0.319095	-0.0547482	-0.526482	-0.694035	-0.150288	0.0887042	0.491832	-0.063258	-0.15898	-0.0851803	-0.00443058	-0.1792	0.0909025
186	3.85694	3.38925	3.30067	4.15837	3.30067	4.15837	3.3365	3.85694	0.968956	4.64058	3.79347	3.85694	6.02913	6.96361	4.93396	7.09944	3.32839	6.36851	0.875381	1.13802	2.90061	1.13802	1.13802		0.0419141	-0.129295	-0.0525957	-0.00694219	0.13913	-0.128178	0.0569136	0.221073	0.536527	0.460824	-0.0775159	-0.273129	0.323261	-0.0466767	-0.526163	-0.682622	-0.0976433	0.0369946	0.559937	-0.0379868	-0.149987	-0.160935	-0.101107	-0.245166	0.143363
187	4.01346	3.39757	3.29915	4.2589	3.29915	4.2589	3.4709	4.01346	0.950745	4.48787	3.75458	4.01346	6.04202	6.61157	4.65424	6.96561	3.3547	5.95539	0.826366	1.66501	3.01434	1.66501	1.66501		0.0272867	-0.100277	-0.0762432	0.124187	0.0968689	-0.130118	0.0551683	0.20506	0.431538	0.420797	-0.0718448	-0.323646	0.355713	-0.0292757	-0.513192	-0.677506	-0.234187	0.00344359	0.533683	-0.0444027	-0.156595	-0.0986279	-0.0547017	-0.180885	-0.00452263
188	3.78473	3.37281	3.28085	4.13535	3.28085	4.13535	3.39369	3.78473	1.00367	4.22754	3.78787	3.78473	5.97646	6.53784	4.94668	6.85885	3.3123	6.14136	0.855129	1.67578	2.65167	1.67578	1.67578		0.0172223	-0.120149	-0.0235161	0.0951235	0.12015	-0.124409	0.062282	0.212574	0.48556	0.530338	-0.0837439	-0.405878	0.300802	-0.056374	-0.549883	-0.682348	-0.201554	0.00841034	0.487799	-0.0807559	-0.165066	-0.13411	-0.138955	-0.240973	-0.0420477
189	3.84853	3.34339	3.31826	4.34442	3.31826	4.34442	3.37043	3.84853	0.973371	4.28613	3.74965	3.84853	6.06102	7.00673	4.59841	7.26139	3.39327	6.23606	0.754888	1.788	2.70481	1.788	1.788		0.0559886	-0.127356	-0.131416	-0.00622648	0.0877844	-0.139389	0.0586071	0.217064	0.506766	0.392595	-0.0633622	-0.422192	0.324387	-0.0243214	-0.514166	-0.686162	-0.11498	0.0460626	0.570221	-0.0725779	-0.174723	-0.128536	-0.137525	-0.213675	0.10537
190	3.79115	3.33049	3.32959	4.31605	3.32959	4.31605	3.35648	3.79115	0.927143	4.7004	3.83218	3.79115	5.76204	6.94274	4.74539	7.31226	3.3469	6.05476	0.767058	1.47486	2.80032	1.47486	1.47486		0.0376471	-0.0944363	-0.0135283	-0.000887128	0.121361	-0.13688	0.0581149	0.218395	0.475904	0.475009	-0.106184	-0.423677	0.30891	-0.0359502	-0.534825	-0.692552	-0.135741	0.0415908	0.636018	-0.0656193	-0.204049	-0.107601	-0.135977	-0.112057	0.11923
191	3.78657	3.36747	3.35621	4.29381	3.35621	4.29381	3.53208	3.78657	0.921599	4.39878	3.79734	3.78657	5.86211	6.69336	4.53908	7.13782	3.36334	6.26035	0.819064	1.79016	2.56856	1.79016	1.79016		0.0435506	-0.135882	-0.098911	0.00769324	0.110656	-0.127232	0.0620405	0.266656	0.62682	0.514551	-0.0441959	-0.441082	0.269395	-0.0247291	-0.535776	-0.676237	-0.144112	-0.000994234	0.501784	-0.0322139	-0.195042	-0.167835	-0.0935353	-0.175099	0.0484277
192	3.79873	3.42567	3.38905	4.1686	3.38905	4.1686	3.68245	3.79873	1.05672	4.4877	3.80574	3.79873	6.18175	7.25156	4.94912	7.40576	3.33416	6.30355	0.771194	1.47745	3.44979	1.47745	1.47745		0.049225	-0.0637018	-0.0182681	0.0123128	0.141001	-0.122968	0.0501031	0.25696	0.561216	0.499038	-0.0189646	-0.308594	0.320864	-0.0281596	-0.526708	-0.654414	-0.125319	0.0201144	0.538919	-0.0428022	-0.231853	-0.0735581	-0.168261	-0.141122	0.0131087
193	3.79966	3.35718	3.33982	4.27699	3.33982	4.27699	3.25962	3.79966	0.94455	4.63002	3.8307	3.79966	5.79282	6.28188	4.52339	7.41235	3.32718	6.05268	0.717216	1.76577	2.88435	1.76577	1.76577		0.0791892	-0.0746194	-0.0708847	0.073205	0.0967588	-0.129421	0.0510916	0.212885	0.487821	0.423433	-0.0815166	-0.346506	0.284231	-0.0604508	-0.536936	-0.705937	-0.155752	0.098072	0.504128	-0.0315672	-0.142987	-0.119301	-0.175224	-0.20464	0.138106
194	3.73313	3.36108	3.34309	4.25221	3.34309	4.25221	3.26488	3.73313	0.980218	4.25005	3.79157	3.73313	5.9632	6.74724	4.76459	7.17113	3.30721	6.03161	0.729338	2.26353	3.13862	2.26353	2.26353		0.0375968	-0.0416283	-0.0815612	0.0650272	0.0940075	-0.120078	0.0543926	0.23514	0.495521	0.540076	-0.0388847	-0.344018	0.310512	-0.101552	-0.528912	-0.665831	-0.0759395	-0.0537277	0.526569	-0.0899768	-0.108324	-0.0645843	-0.117568	-0.189369	0.0322613
195	3.73477	3.34822	3.31917	4.34565	3.31917	4.34565	3.71172	3.73477	0.972242	4.27395	3.76447	3.73477	5.68044	6.74345	4.81517	7.15622	3.37841	6.22644	0.691618	1.82205	3.16566	1.82205	1.82205		0.0646455	-0.0372819	-0.0579137	0.0475452	0.129415	-0.137125	0.065602	0.267824	0.462063	0.409416	-0.0279571	-0.308291	0.318352	-0.0835717	-0.531241	-0.666665	-0.0148419	0.0600464	0.523497	-0.0442222	-0.148715	-0.0586776	-0.107201	-0.233825	0.0305797
196	3.66045	3.42449	3.39274	4.3908	3.39274	4.3908	3.5648	3.66045	1.01544	4.31772	3.81004	3.66045	6.08356	6.27084	4.58509	7.18978	3.36783	6.205	0.752883	2.32706	2.77214	2.32706	2.32706		0.0154463	-0.0945714	-0.0675812	0.12095	0.142311	-0.152272	0.0599643	0.233225	0.48724	0.519399	-0.0415338	-0.405485	0.349301	-0.119124	-0.539967	-0.673657	-0.166957	0.0273072	0.513213	-0.0640902	-0.182745	-0.198107	-0.181858	-0.169998	0.0387539
197	3.74709	3.4755	3.37552	4.34565	3.37552	4.34565	3.28222	3.74709	0.980132	4.4952	3.76885	3.74709	6.37676	6.56706	4.82474	7.3148	3.34438	6.06356	0.779085	2.71923	2.8069	2.71923	2.71923		0.041149	-0.13198	-0.00712014	-0.000704135	0.0660437	-0.141789	0.0472084	0.220111	0.556633	0.482512	-0.0520265	-0.421016	0.360823	-0.0963688	-0.528632	-0.696412	-0.10967	0.0748448	0.647097	-0.0476651	-0.146989	-0.131097	-0.0195096	-0.0609788	0.136649
198	3.8494	3.41628	3.39973	4.28565	3.39973	4.28565	3.43183	3.8494	0.841226	4.49347	3.8261	3.8494	5.95727	6.1999	4.68388	6.70662	3.35824	6.0399	0.728097	1.6157	2.51559	1.6157	1.6157		0.054933	-0.114873	-0.0969333	0.0193764	0.100651	-0.130407	0.0573868	0.246775	0.532004	0.555736	-0.0417372	-0.394667	0.410532	-0.069365	-0.536843	-0.687338	-0.149538	0.0482037	0.585346	-0.0726506	-0.190057	-0.118949	-0.160787	-0.156319	0.177932
199	3.69275	3.37861	3.4045	4.20597	3.4045	4.20597	3.37825	3.69275	0.941024	4.69947	3.76064	3.69275	6.01816	6.26157	4.89626	6.97766	3.37898	6.00834	0.748015	3.47885	2.67729	3.47885	3.47885		0.0313136	-0.0252598	-0.148703	0.0405711	0.112587	-0.129575	0.0575001	0.233069	0.51306	0.54231	-0.0151882	-0.422542	0.336184	-0.0846207	-0.548964	-0.691519	-0.0403952	0.000685861	0.587031	-0.0861629	-0.189886	-0.120447	-0.156433	-0.105512	-0.00327873
200	3.71523	3.33671	3.36144	4.31683	3.36144	4.31683	3.20654	3.71523	0.939757	4.4015	3.70928	3.71523	5.76233	6.05393	4.95417	6.70186	3.38501	6.07387	0.754967	2.43635	2.96126	2.43635	2.43635		0.0723698	-0.0824937	-0.1603	0.0340118	0.111096	-0.139643	0.0641311	0.245184	0.543066	0.446006	-0.0550492	-0.293153	0.396747	-0.0734667	-0.548917	-0.671344	-0.0525818	0.0213137	0.514565	-0.112116	-0.16182	-0.148473	-0.156337	-0.189589	0.067238
201	3.76399	3.38062	3.35409	4.29465	3.35409	4.29465	3.43621	3.76399	1.01635	4.39491	3.74296	3.76399	5.84455	6.55936	4.74245	7.01217	3.31242	6.11214	0.840159	2.51659	2.80973	2.51659	2.51659		0.0685495	-0.103185	-0.0736873	0.0078437	0.0872942	-0.131511	0.0633081	0.216066	0.518225	0.522497	-0.0386741	-0.317058	0.303933	-0.0680699	-0.52342	-0.675507	-0.0822698	0.031728	0.556569	-0.0330887	-0.191284	-0.125669	-0.162023	-0.24053	0.102813
202	3.72087	3.39877	3.32375	4.25093	3.32375	4.25093	3.43943	3.72087	0.96543	4.72216	3.8831	3.72087	5.85896	6.5627	4.82408	6.63557	3.33488	6.24466	0.749479	1.98375	2.97801	1.98375	1.98375		0.0397136	-0.0942138	-0.0370836	-0.044033	0.146103	-0.134025	0.0652472	0.225303	0.527391	0.583074	-0.0469532	-0.355405	0.376753	-0.0606546	-0.546643	-0.683175	0.0743719	0.0615143	0.506194	-0.0521358	-0.142479	-0.099543	-0.0521104	-0.277275	0.102427
203	3.76559	3.35972	3.29538	3.94359	3.29538	3.94359	3.39867	3.76559	0.983692	4.57545	3.74152	3.76559	5.73569	6.75049	4.67552	6.9918	3.35608	6.03376	0.844645	2.7207	2.47871	2.7207	2.7207		0.0600881	-0.116526	-0.120886	0.0386761	0.0839225	-0.129381	0.0612981	0.254053	0.53555	0.531434	-0.0471364	-0.425815	0.40038	-0.0602966	-0.535269	-0.695545	-0.0959894	0.101042	0.591589	-0.0436294	-0.194053	-0.117573	-0.0726295	-0.17245	0.114116
204	3.81693	3.45693	3.3316	4.4031	3.3316	4.4031	3.45952	3.81693	0.986721	4.47326	3.73779	3.81693	6.26785	6.40486	4.66769	7.06139	3.34731	6.1086	0.737085	1.95936	2.36069	1.95936	1.95936		0.0536987	-0.0110765	-0.0835462	0.0154359	0.115638	-0.131563	0.0660562	0.226368	0.680689	0.634419	0.012535	-0.328837	0.339474	-0.0562198	-0.553288	-0.68744	-0.154848	0.0813474	0.525002	-0.0652521	-0.188431	-0.128677	-0.19427	-0.233977	-0.0795599
205	3.60237	3.39352	3.3288	4.31846	3.3288	4.31846	3.32654	3.60237	0.988176	4.70484	3.82362	3.60237	5.81214	6.50631	4.56557	7.11759	3.3299	6.57157	0.72719	1.99495	2.69589	1.99495	1.99495		0.0698844	-0.0230986	-0.139035	0.059456	0.135858	-0.119595	0.0621447	0.238683	0.518958	0.522181	-0.0800626	-0.296554	0.43294	-0.0525756	-0.548746	-0.677522	0.0460235	-0.00389339	0.532331	-0.0947708	-0.165618	-0.0804002	-0.118965	-0.174835	-0.0562551
206	3.71947	3.37491	3.35053	4.43202	3.35053	4.43202	3.45393	3.71947	0.925945	4.6325	3.76932	3.71947	6.18956	6.53395	4.51451	7.07522	3.34533	6.45941	0.795901	2.62382	2.86939	2.62382	2.62382		0.0325367	-0.0299558	-0.0856086	0.0331863	0.110856	-0.135601	0.0512711	0.26136	0.531363	0.625777	-0.0225983	-0.343365	0.365765	-0.0940619	-0.550296	-0.671015	-0.0851375	0.0450556	0.5409	-0.125597	-0.192361	-0.115934	-0.172257	-0.159076	-0.00735717
207	3.66052	3.40621	3.31111	4.35883	3.31111	4.35883	3.0333	3.66052	0.85627	4.73077	3.78382	3.66052	5.80101	6.29005	4.48632	6.83107	3.32761	6.36687	0.690441	1.95643	2.47969	1.95643	1.95643		0.0643272	-0.0856323	-0.0824819	0.0390299	0.142011	-0.140526	0.0603334	0.25406	0.585111	0.589502	-0.0339946	-0.40457	0.388624	-0.0432636	-0.547375	-0.664875	-0.010949	0.0582616	0.573688	-0.0383854	-0.19203	-0.0950309	-0.160802	-0.248162	0.203668
208	3.54399	3.3929	3.45315	4.37497	3.45315	4.37497	3.1354	3.54399	0.996203	4.86835	3.8145	3.54399	5.76761	6.22234	4.32696	6.8579	3.34941	6.29014	0.677077	2.33085	2.4835	2.33085	2.33085		0.0607471	-0.0209691	-0.134712	0.084087	0.130455	-0.135094	0.0566963	0.217966	0.55865	0.561575	-0.0536636	-0.31287	0.402859	-0.0961376	-0.533617	-0.678201	-0.00190574	0.0923783	0.662487	-0.040506	-0.149335	-0.134066	-0.163935	-0.124166	0.0536851
209	3.46313	3.41013	3.35738	4.44977	3.35738	4.44977	3.10235	3.46313	0.966371	4.83186	3.83421	3.46313	5.82556	6.2778	4.24041	6.43399	3.35714	6.10379	0.729688	2.50651	2.81598	2.50651	2.50651		0.0527213	-0.0760417	-0.0596815	0.0385378	0.157179	-0.133883	0.047166	0.303208	0.590183	0.5957	-0.0530319	-0.347421	0.349535	-0.102335	-0.548224	-0.685185	-0.0750739	0.0611268	0.545588	-0.109766	-0.172651	-0.108542	-0.107442	-0.211279	0.0132907
210	3.73129	3.39849	3.36906	4.57499	3.36906	4.57499	3.15609	3.73129	0.884356	4.6922	3.77739	3.73129	5.91405	6.74261	4.28234	6.29748	3.43614	6.18273	0.614667	1.8954	3.10822	1.8954	1.8954		0.049253	-0.0833439	-0.109657	0.0191486	0.149685	-0.123965	0.0710033	0.258697	0.620097	0.563388	-0.0619089	-0.404699	0.422129	-0.117379	-0.539577	-0.671284	-0.063042	0.00803981	0.55117	-0.0686298	-0.151277	-0.198401	-0.180771	-0.121516	0.0849473
211	3.74111	3.38634	3.34082	4.42085	3.34082	4.42085	3.25119	3.74111	0.89139	4.79127	3.7959	3.74111	5.99042	6.55073	4.21026	6.56681	3.33675	6.32417	0.714782	1.9397	2.51412	1.9397	1.9397		0.0610431	-0.0296141	-0.0821799	0.124602	0.109485	-0.127758	0.0506563	0.24304	0.673631	0.578332	-0.0182722	-0.36522	0.37818	-0.0501593	-0.55684	-0.686917	-0.0735795	0.0221651	0.534379	-0.0786428	-0.138764	-0.13436	-0.133466	-0.170839	0.0850037
212	3.64993	3.42233	3.29703	4.6703	3.29703	4.6703	3.13158	3.64993	0.975032	4.83175	3.75904	3.64993	6.13812	6.69912	4.47097	6.85898	3.35723	6.12852	0.664669	2.20173	2.68273	2.20173	2.20173		0.0522298	-0.0396418	-0.0877704	0.00590397	0.165052	-0.133483	0.0578075	0.250281	0.800682	0.53586	-0.0249553	-0.292236	0.322418	-0.0630485	-0.54859	-0.685218	-0.0931604	0.0914251	0.590381	-0.0817398	-0.21425	-0.136031	-0.283032	-0.211815	0.0552324
213	3.52124	3.38141	3.32781	4.59579	3.32781	4.59579	3.14607	3.52124	0.893153	5.08296	3.72712	3.52124	5.90758	6.39345	4.41846	6.55844	3.3655	5.89213	0.677826	1.62182	2.81408	1.62182	1.62182		0.0698062	-0.0144138	-0.0971653	0.0121746	0.097109	-0.126883	0.0685296	0.267655	0.685701	0.660997	-0.0228701	-0.393706	0.335518	-0.0935499	-0.522166	-0.67579	-0.0730282	0.0874483	0.531388	-0.0827851	-0.234618	-0.171911	-0.107918	-0.175512	0.0527229
214	3.58554	3.44437	3.35833	4.7336	3.35833	4.7336	2.97091	3.58554	0.907205	4.92274	3.7809	3.58554	6.25075	6.40699	4.26677	6.92184	3.3681	6.22385	0.776826	2.31835	2.55796	2.31835	2.31835		0.0493814	-0.0361218	-0.042851	-0.0102361	0.124232	-0.131024	0.0545016	0.280317	0.683745	0.645189	0.00846713	-0.33608	0.400071	-0.0813518	-0.538845	-0.677311	-0.0375274	0.0435368	0.593587	-0.0378414	-0.168	-0.106097	-0.138152	-0.141353	-0.00243357
215	3.68343	3.46508	3.4074	4.48336	3.4074	4.48336	3.06678	3.68343	0.962503	4.98134	3.81389	3.68343	5.98415	6.07461	4.37126	6.83506	3.34451	6.21936	0.719379	2.36007	2.99395	2.36007	2.36007		0.0300793	0.00448145	-0.0985317	-6.16235e-05	0.12044	-0.123039	0.0649209	0.304125	0.718731	0.642956	-0.0410715	-0.293021	0.409847	-0.0212564	-0.540878	-0.669052	-0.0147984	0.112443	0.5693	-0.070842	-0.183126	-0.16601	-0.243519	-0.212164	0.174725
216	3.56219	3.43032	3.39531	4.59732	3.39531	4.59732	3.11943	3.56219	0.978541	5.04035	3.76656	3.56219	6.09883	6.42581	4.43877	6.75806	3.35542	5.99404	0.670205	1.98978	2.49149	1.98978	1.98978		0.0669969	0.00653943	-0.0423243	0.03476	0.132086	-0.113292	0.0714054	0.271574	0.668559	0.671958	-0.0514358	-0.331978	0.364195	-0.0518274	-0.530868	-0.681737	-0.0128737	0.0289533	0.57813	-0.0496379	-0.181421	-0.0867164	-0.169343	-0.148151	0.111797
217	3.62862	3.45744	3.39583	4.59437	3.39583	4.59437	2.98366	3.62862	0.924063	4.83013	3.76612	3.62862	6.22079	6.10039	4.19984	6.68074	3.42216	6.23315	0.742829	2.35921	2.72374	2.35921	2.35921		0.0512971	-0.0163843	-0.0481248	-0.00749117	0.116559	-0.124904	0.0558021	0.252692	0.709442	0.715209	-0.0809324	-0.329492	0.412218	-0.100649	-0.544843	-0.667146	-0.090133	0.0552918	0.550838	-0.086589	-0.165694	-0.128338	-0.189119	-0.198315	0.039131
218	3.85337	3.41582	3.38102	4.5325	3.38102	4.5325	3.26909	3.85337	0.954528	4.8564	3.76614	3.85337	5.73438	6.21678	4.49004	6.68055	3.37588	6.21708	0.69278	1.78326	3.12938	1.78326	1.78326		0.0402107	-0.0420891	-0.0846953	0.0711636	0.060551	-0.12986	0.0701708	0.282994	0.68023	0.623796	-0.0178034	-0.420622	0.399202	-0.0646394	-0.551442	-0.652875	0.0257366	0.113275	0.569035	-0.10902	-0.175107	-0.109642	-0.151764	-0.235172	0.00207395
219	3.62141	3.47029	3.38434	4.53948	3.38434	4.53948	3.10394	3.62141	0.862312	4.72286	3.76143	3.62141	6.124	6.33799	4.30826	6.45688	3.42216	6.39584	0.64596	1.94893	2.354	1.94893	1.94893		0.0549721	-0.0104091	-0.140788	0.0117028	0.172456	-0.126776	0.0785282	0.276353	0.668559	0.745709	-0.0628732	-0.388036	0.390311	-0.106653	-0.543059	-0.665578	-0.0843541	0.0613559	0.612723	-0.0704384	-0.14113	-0.184417	-0.140545	-0.152464	0.160925
220	3.67849	3.44748	3.38222	4.73321	3.38222	4.73321	3.27002	3.67849	0.984753	4.6284	3.78933	3.67849	5.83256	6.09465	4.20959	6.68004	3.36264	6.26446	0.713143	2.34179	2.83866	2.34179	2.34179		0.0388535	0.0249976	-0.0752157	0.0178148	0.080871	-0.123483	0.0525814	0.248365	0.611328	0.619011	-0.0208802	-0.357585	0.357875	-0.0801834	-0.557409	-0.654068	-0.014015	0.115891	0.591719	-0.0746271	-0.211254	-0.0764826	-0.229307	-0.186988	-0.0584915
221	3.72174	3.37854	3.3159	4.36198	3.3159	4.36198	2.94558	3.72174	0.98412	4.71743	3.60578	3.72174	5.64507	6.11013	4.34859	6.62067	3.36667	6.1883	0.633504	2.17234	2.60615	2.17234	2.17234		0.0487894	-0.0451324	-0.00969075	0.0580775	0.0982596	-0.112714	0.0561996	0.304155	0.639653	0.688125	-0.0591379	-0.393706	0.368938	-0.131476	-0.542686	-0.669157	-0.0446411	0.116369	0.488181	-0.0585128	-0.12475	-0.177345	-0.19962	-0.225594	0.0536851
222	3.80073	3.39507	3.35278	4.5082	3.35278	4.5082	3.04391	3.80073	0.849578	4.39618	3.75134	3.80073	5.83899	6.45725	4.33188	6.74918	3.33593	6.1258	0.603976	2.32257	3.26508	2.32257	2.32257		0.0689461	-0.0436545	-0.11541	-4.94239e-05	0.0458738	-0.113304	0.0591178	0.302816	0.781248	0.632163	-0.0527469	-0.365699	0.383172	-0.10849	-0.521044	-0.660399	0.0107548	0.0267952	0.574797	-0.100339	-0.16433	-0.139052	-0.152321	-0.228299	-0.00519876
223	3.57722	3.42979	3.35791	4.38564	3.35791	4.38564	3.22799	3.57722	0.906024	4.42863	3.72262	3.57722	5.6247	5.82857	4.44161	6.62003	3.4108	6.36276	0.738565	2.15605	2.49721	2.15605	2.15605		0.0689796	-0.00813654	-0.161652	0.113045	0.132486	-0.117346	0.0703033	0.304303	0.802026	0.695397	-0.00532732	-0.287655	0.399645	-0.0914394	-0.539258	-0.659323	0.109911	0.0717335	0.545521	-0.0115375	-0.133917	-0.109969	-0.108812	-0.184175	0.0158912
224	3.66483	3.37399	3.40238	4.49851	3.40238	4.49851	3.04205	3.66483	0.938748	4.69699	3.63188	3.66483	5.61741	6.08231	4.56418	6.7774	3.3818	6.3384	0.67905	2.09063	2.23097	2.09063	2.09063		0.0519171	0.000532371	-0.0679052	0.105737	0.166343	-0.126578	0.0606549	0.296115	0.669108	0.691223	-0.0200991	-0.299171	0.407818	-0.126853	-0.549494	-0.666686	0.000845921	0.0971188	0.514695	-0.0676911	-0.212093	-0.130905	-0.233709	-0.176632	0.0141186
225	3.5496	3.41383	3.33556	4.37516	3.33556	4.37516	3.26942	3.5496	0.896507	4.69295	3.82356	3.5496	5.72001	6.2458	4.49462	6.56865	3.34091	6.36282	0.731009	2.44661	2.69486	2.44661	2.44661		0.0455724	-0.0182993	-0.104756	0.147578	0.126824	-0.12484	0.055665	0.316521	0.746904	0.632479	-0.0281064	-0.267414	0.417127	-0.106449	-0.561273	-0.630087	0.138497	0.0528876	0.519536	-0.0797695	-0.124528	-0.109367	-0.129359	-0.138782	0.129021
226	3.64449	3.47773	3.3805	4.41849	3.3805	4.41849	3.18602	3.64449	0.896183	4.72326	3.77352	3.64449	6.06437	6.76496	4.50012	7.0756	3.4071	6.39432	0.672321	1.45737	2.59696	1.45737	1.45737		0.0622886	-0.0198884	-0.0714555	0.0720216	0.113827	-0.123538	0.0652472	0.280797	0.733398	0.628813	-0.0519384	-0.286913	0.420642	-0.158073	-0.570278	-0.662265	-0.059623	0.0503759	0.481229	-0.0552378	-0.119956	-0.0900131	-0.173751	-0.261624	0.07816
227	3.65618	3.46858	3.33687	4.43384	3.33687	4.43384	3.37289	3.65618	0.869209	4.8553	3.86398	3.65618	5.93308	5.92836	4.3304	6.31657	3.34776	6.17748	0.715036	2.26008	2.66456	2.26008	2.26008		0.0436399	-0.0501859	-0.0800733	0.073449	0.134667	-0.130106	0.0599598	0.275731	0.757689	0.606006	-0.0129538	-0.393141	0.456526	-0.0942484	-0.543729	-0.656183	-0.0171971	0.00503318	0.431847	-0.0909268	-0.214094	-0.0600215	-0.218356	-0.191825	0.0851077
228	3.54212	3.46238	3.39845	4.52448	3.39845	4.52448	3.20545	3.54212	0.921889	4.84353	3.79562	3.54212	6.10652	6.29505	4.46204	6.55742	3.43495	6.21215	0.75511	2.20363	3.4053	2.20363	2.20363		0.0349439	0.00727045	-0.165471	0.0254436	0.178809	-0.13184	0.0672337	0.33016	0.83741	0.662367	-0.0402024	-0.31684	0.448694	-0.15155	-0.540886	-0.662977	0.0872646	0.129538	0.530216	-0.103429	-0.169111	-0.102052	-0.181284	-0.130968	0.0469455
229	3.67077	3.43222	3.36914	4.48056	3.36914	4.48056	3.29585	3.67077	0.976007	4.98452	3.8864	3.67077	6.17704	6.01721	4.57347	6.76941	3.40039	6.29596	0.738836	1.54503	3.06476	1.54503	1.54503		0.0739503	0.0292725	-0.110571	0.0201002	0.060471	-0.128067	0.0687	0.311233	0.775565	0.721364	-0.0150937	-0.301789	0.447225	-0.0613357	-0.521317	-0.669987	-0.130001	0.0703702	0.482616	-0.0515944	-0.147484	-0.122469	-0.185328	-0.229638	0.0582923
230	3.667	3.48865	3.39219	4.6586	3.39219	4.6586	3.03653	3.667	0.994166	4.52644	3.73335	3.667	6.29593	6.36043	4.70008	6.39117	3.35338	6.56512	0.799321	3.0909	2.70361	3.0909	3.0909		0.0794238	-0.0562963	-0.132922	0.0855997	0.111916	-0.116174	0.0695703	0.294207	0.81767	0.716052	-0.0624181	-0.375865	0.381703	-0.132695	-0.522766	-0.675495	0.0802282	0.0600662	0.498106	-0.0894103	-0.174171	-0.0714011	-0.0738983	-0.281175	-0.0362313
231	3.6336	3.39557	3.3666	4.41859	3.3666	4.41859	3.24818	3.6336	0.949051	4.634	3.77759	3.6336	5.70651	5.54776	4.54969	6.68429	3.43733	6.39072	0.661869	1.828	2.62546	1.828	1.828		0.0498673	-0.0112672	-0.0955228	0.0367933	0.138819	-0.121067	0.0681514	0.313408	0.751701	0.786894	0.00956706	-0.299086	0.42814	-0.083164	-0.531616	-0.649512	0.0904128	0.0458335	0.539395	-0.0644625	-0.166598	-0.0541907	-0.104277	-0.193797	-0.00232955
232	3.62749	3.44082	3.36165	4.52163	3.36165	4.52163	3.29984	3.62749	0.878913	4.71593	3.74835	3.62749	5.97278	6.656	4.19898	6.59199	3.38851	6.18779	0.752263	1.75689	2.51233	1.75689	1.75689		0.0573458	0.0385055	-0.104347	0.188125	0.113227	-0.119923	0.0676831	0.321817	0.711489	0.66749	-0.0408615	-0.375166	0.435277	-0.139036	-0.535378	-0.652015	0.0580118	0.0448803	0.486528	-0.0607839	-0.162335	-0.0812061	-0.21486	-0.253821	0.163799
233	3.52962	3.43964	3.37699	4.44382	3.37699	4.44382	3.30586	3.52962	0.89466	4.75646	3.81647	3.52962	5.77981	6.16317	4.55389	6.63932	3.44137	6.53855	0.76464	1.62019	2.52103	1.62019	1.62019		0.0360777	0.0267775	-0.115023	0.00204077	0.121151	-0.123882	0.0669123	0.304835	0.898918	0.672907	-0.0255597	-0.252844	0.39421	-0.140194	-0.540154	-0.659981	-0.00347743	-0.023568	0.445647	-0.125884	-0.229568	-0.133931	-0.169484	-0.189481	0.0628778
234	3.60978	3.47723	3.40766	4.30891	3.40766	4.30891	2.96632	3.60978	0.924525	4.61529	3.67882	3.60978	6.1355	5.6009	4.33144	6.51594	3.39181	6.3348	0.688628	2.02297	2.32936	2.02297	2.02297		0.0436902	0.0452992	-0.11674	-0.0145547	0.211645	-0.12144	0.0655785	0.314377	0.832704	0.725495	-0.041642	-0.31732	0.394928	-0.0986235	-0.549938	-0.666	-0.0262403	0.155294	0.476293	-0.0825357	-0.161954	-0.0916513	-0.238073	-0.153993	-0.119252
235	3.5163	3.4913	3.33299	4.51415	3.33299	4.51415	3.4048	3.5163	0.835955	4.88966	3.77421	3.5163	6.17426	6.20389	4.45541	6.36859	3.35293	6.33575	0.748874	2.17277	2.34894	2.17277	2.17277		0.0417187	0.0770508	-0.108324	0.0117598	0.137279	-0.112635	0.0763244	0.316248	0.856232	0.714641	0.00275492	-0.296948	0.420058	-0.100045	-0.540847	-0.658177	0.0935948	0.0399135	0.531388	-0.0955116	-0.208532	-0.129419	-0.166318	-0.196536	0.148066
236	3.67174	3.43029	3.36607	4.39931	3.36607	4.39931	3.06503	3.67174	0.837136	4.93123	3.86049	3.67174	6.04808	5.87235	4.40154	6.86126	3.37024	6.27578	0.686161	2.73449	2.51466	2.73449	2.73449		0.0852267	-0.0268728	-0.0944179	0.00123967	0.062542	-0.13296	0.0631899	0.348089	0.963177	0.683297	-0.0362499	-0.318411	0.46459	-0.105189	-0.551216	-0.64308	0.115729	0.108642	0.470415	-0.100138	-0.148339	-0.1134	-0.111244	-0.314299	-0.0103607
237	3.5672	3.44662	3.43606	4.38141	3.43606	4.38141	3.35029	3.5672	0.912511	4.77453	3.85055	3.5672	6.20495	6.30006	4.51486	6.53269	3.38456	6.216	0.721416	2.41549	2.86205	2.41549	2.41549		0.0641205	-0.0444729	-0.0921014	-0.00796288	0.0952081	-0.128411	0.0540617	0.310982	0.854307	0.734474	0.00169541	-0.266803	0.470468	-0.105639	-0.546246	-0.636342	0.0822739	0.0728451	0.525199	-0.106825	-0.149123	-0.0336968	-0.233741	-0.223945	0.13746
238	3.53851	3.46882	3.34482	4.43079	3.34482	4.43079	3.21305	3.53851	0.966234	4.86662	3.79976	3.53851	5.97609	6.19035	4.38108	6.17442	3.40319	6.18539	0.730229	1.99487	2.50667	1.99487	1.99487		0.0715878	-0.00679369	-0.118246	-0.00409155	0.126383	-0.12104	0.0665905	0.291522	0.883244	0.756248	-0.0328197	-0.251404	0.41676	-0.0790449	-0.528235	-0.651489	-0.0317049	0.0514734	0.519087	-0.0877847	-0.150987	-0.120037	-0.106462	-0.180971	-0.0422731
239	3.54953	3.42491	3.38306	4.43305	3.38306	4.43305	3.46302	3.54953	0.84749	4.52557	3.77488	3.54953	6.05536	5.8589	4.42159	6.18083	3.38363	5.80149	0.695961	2.68976	1.89696	2.68976	2.68976		0.0628695	-0.0243858	-0.131069	0.0992389	0.0619317	-0.125684	0.0699156	0.29451	0.803064	0.817963	-0.0450311	-0.304756	0.493002	-0.125374	-0.547905	-0.64077	0.0981938	0.100847	0.529803	-0.0641466	-0.171805	-0.0524877	-0.167572	-0.200968	0.0284516
240	3.63841	3.457	3.4136	4.47185	3.4136	4.47185	3.4645	3.63841	0.884492	4.78371	3.79534	3.63841	5.97228	6.40754	4.64242	6.50509	3.4537	6.11384	0.699223	1.48185	2.68898	1.48185	1.48185		0.0674269	0.0222166	-0.109665	0.142442	0.116378	-0.127912	0.0591367	0.32556	0.926541	0.80207	-0.0166761	-0.368928	0.431771	-0.0844168	-0.535441	-0.644931	0.0963852	0.0837883	0.541295	-0.0993769	-0.210329	-0.108183	-0.196776	-0.156141	-0.00443595
241	3.58971	3.42813	3.36173	4.39739	3.36173	4.39739	3.31128	3.58971	0.974039	4.76939	3.76796	3.58971	5.78103	6.2855	4.57163	6.53161	3.41078	6.1055	0.774774	2.89128	2.45951	2.89128	2.89128		0.0992565	0.00510123	0.0135442	0.0211819	0.214307	-0.116709	0.067002	0.318837	0.88581	0.64578	-0.0248803	-0.340048	0.418171	-0.0710156	-0.555368	-0.639801	0.165665	0.148896	0.508309	-0.0825244	-0.213626	-0.119147	-0.142184	-0.225225	0.0157439
242	3.70203	3.52042	3.41379	4.29982	3.41379	4.29982	3.20933	3.70203	0.847781	4.44549	3.78524	3.70203	6.39309	6.49527	4.85515	6.50808	3.44816	6.23833	0.704314	2.15157	2.54414	2.15157	2.15157		0.0748607	-0.0132219	-0.102262	0.00831542	0.134407	-0.112928	0.0701898	0.307831	0.843216	0.668164	0.00623271	-0.297951	0.404471	-0.0936021	-0.560151	-0.637686	0.0170464	0.0229231	0.466305	-0.0612752	-0.126245	-0.0894437	-0.210721	-0.152754	-0.0652398
243	3.67545	3.3915	3.42601	4.47215	3.42601	4.47215	3.5776	3.67545	0.916806	4.58775	3.92609	3.67545	6.21146	6.64894	4.64984	6.58762	3.39812	6.36409	0.812335	2.86214	2.61828	2.86214	2.86214		0.0794796	0.0588946	-0.0339164	0.0251549	0.138149	-0.127065	0.0638097	0.328785	0.810673	0.766596	-0.0655692	-0.332589	0.404504	-0.0700113	-0.575661	-0.626445	0.0700824	0.131501	0.491518	-0.0871329	-0.186649	-0.125842	-0.17064	-0.295136	0.032062
244	3.62254	3.40689	3.32831	4.29736	3.32831	4.29736	3.24463	3.62254	0.781597	5.00293	3.90106	3.62254	6.15805	6.47441	4.75123	6.49982	3.37485	6.04869	0.760758	2.82844	2.33746	2.82844	2.82844		0.0548604	0.000818422	-0.0653273	0.127461	0.0464441	-0.124476	0.0710317	0.359353	1.02294	0.788159	-0.00980268	-0.22152	0.471036	-0.0592426	-0.570146	-0.639692	0.203681	0.0314282	0.490359	-0.106612	-0.152185	-0.0503955	-0.178447	-0.190121	0.134942
245	3.57057	3.42292	3.42041	4.20612	3.42041	4.20612	3.1406	3.57057	0.920623	4.77003	3.80933	3.57057	5.80891	5.98437	4.67501	6.93598	3.41319	6.23321	0.775712	2.14407	2.1539	2.14407	2.14407		0.0763464	-0.025085	-0.127486	-0.0491202	0.135608	-0.118328	0.0750236	0.353747	0.950955	0.783332	-0.0481353	-0.231075	0.458831	-0.0894383	-0.567583	-0.632139	-0.0272655	0.126198	0.534577	-0.0404409	-0.202439	-0.214544	-0.251263	-0.233958	0.0684819
246	3.66282	3.42233	3.38353	4.35647	3.38353	4.35647	3.37152	3.66282	0.903679	4.74052	3.84129	3.66282	6.01763	6.371	4.65054	6.22504	3.45715	6.137	0.746345	2.71286	2.81484	2.71286	2.71286		0.0538495	0.00143025	-0.0129243	0.0852216	0.128735	-0.130181	0.0818296	0.37226	1.04226	0.766407	0.0328221	-0.310776	0.415474	-0.0987179	-0.583163	-0.646911	0.0486591	0.0360414	0.52003	-0.0662109	-0.187813	-0.129592	-0.134779	-0.298239	0.0510152
247	3.60892	3.45258	3.39934	4.41569	3.39934	4.41569	3.2686	3.60892	0.987406	4.92823	3.78343	3.60892	6.24134	6.37045	4.71821	6.77524	3.39742	6.13719	0.804221	2.33024	3.04099	2.33024	2.33024		0.05352	0.012467	-0.137971	0.0525186	0.082942	-0.125608	0.0783155	0.351439	0.920124	0.902315	-0.0272849	-0.327572	0.444928	-0.102489	-0.576113	-0.634336	0.0475565	0.102368	0.507447	-0.0996526	-0.168946	-0.0645074	-0.174972	-0.197708	0.102483
248	3.68954	3.42517	3.38835	4.34964	3.38835	4.34964	3.51894	3.68954	0.919579	4.41171	3.82906	3.68954	6.00629	6.76978	4.8494	6.69672	3.43126	6.29406	0.727031	2.05899	2.07911	2.05899	2.05899		0.0514647	-0.00600706	-0.157125	0.0880844	0.128965	-0.120671	0.0860437	0.360832	0.957953	0.78995	-0.0175524	-0.291363	0.450264	-0.113496	-0.568175	-0.641732	0.228218	0.120663	0.546082	-0.0924246	-0.171602	-0.0290309	-0.197504	-0.175006	-0.0163289
249	3.62715	3.46175	3.37348	4.26952	3.37348	4.26952	3.28737	3.62715	0.91441	4.81835	3.68998	3.62715	6.36841	6.12079	4.41335	6.38229	3.3746	6.2093	0.687402	2.05046	2.76551	2.05046	2.05046		0.0608533	0.00924101	-0.0411679	0.076873	0.169715	-0.127655	0.0955975	0.342039	0.965652	0.875209	-0.0535887	-0.305977	0.44381	-0.134191	-0.565121	-0.632881	0.100791	0.0809259	0.496749	-0.124549	-0.190719	-0.125036	-0.235626	-0.19254	0.00178789
250	3.64629	3.44371	3.34409	4.34324	3.34409	4.34324	3.35609	3.64629	0.837752	4.73614	3.75955	3.64629	6.3813	6.51197	4.56128	6.71074	3.48088	6.11163	0.746567	1.70802	2.28334	1.70802	1.70802		0.0464269	0.0145012	-0.0782098	0.00105261	0.166203	-0.127224	0.0846342	0.37473	1.01152	0.793765	-0.0201669	-0.318934	0.4923	-0.0802356	-0.557276	-0.636396	0.0817226	0.0729865	0.515059	-0.055481	-0.235495	-0.0649048	-0.214785	-0.261449	-0.0048737
251	3.58587	3.44868	3.35511	4.47013	3.35511	4.47013	3.11658	3.58587	0.880334	4.64179	3.82626	3.58587	6.29114	6.13999	4.61695	6.80176	3.43711	5.9979	0.744261	1.86799	2.52886	1.86799	1.86799		0.059133	0.0217557	-0.0670766	0.0486798	0.103862	-0.120664	0.0774405	0.362763	0.915357	0.873713	-0.0230534	-0.261873	0.505367	-0.123763	-0.569414	-0.610114	0.160945	0.110322	0.538686	-0.127298	-0.195454	-0.199497	-0.225421	-0.186899	0.0175555
252	3.56346	3.43824	3.37034	4.39941	3.37034	4.39941	3.27095	3.56346	0.803949	5.04347	3.86872	3.56346	6.47507	6.40105	4.58689	6.96174	3.49902	6.06919	0.689741	1.82334	2.63215	1.82334	1.82334		0.092331	0.0495741	-0.0441694	0.0251427	0.0924267	-0.115137	0.0795357	0.3951	0.93036	0.780297	-0.0639327	-0.274481	0.523266	-0.0917551	-0.558289	-0.625557	0.153043	0.0445974	0.46234	-0.0717857	-0.196973	-0.118847	-0.287263	-0.223953	0.109505
253	3.6527	3.41539	3.44998	4.44692	3.44998	4.44692	3.21196	3.6527	0.799345	5.11275	3.90402	3.6527	6.12588	5.92196	4.63059	6.84223	3.43171	6.30887	0.791574	2.19863	2.55584	2.19863	2.19863		0.0855562	0.0610956	-0.138442	0.0826962	0.100891	-0.124868	0.100904	0.376808	0.996727	0.886865	-0.0408544	-0.266191	0.430277	-0.151619	-0.572561	-0.603876	0.201558	0.0558235	0.414974	-0.0998958	-0.177067	-0.189121	-0.163314	-0.328919	0.0430664
254	3.60331	3.4232	3.36741	4.49585	3.36741	4.49585	3.35932	3.60331	0.817162	4.81997	3.85072	3.60331	6.37983	6.41867	4.90311	6.67388	3.45847	6.45973	0.773278	2.37679	2.69426	2.37679	2.37679		0.0942969	0.05458	-0.0560539	0.0836966	0.145573	-0.118166	0.0981753	0.383525	1.02817	0.939391	-0.0355092	-0.380795	0.440704	-0.107232	-0.570044	-0.642376	0.16539	0.0958092	0.498119	-0.126097	-0.188066	-0.102621	-0.156214	-0.168621	0.0589857
255	3.53159	3.45089	3.34461	4.33149	3.34461	4.33149	3.28944	3.53159	0.874788	4.91281	3.95164	3.53159	6.33149	6.39484	4.64877	6.26304	3.41185	6.12978	0.770829	2.15769	2.2586	2.15769	2.15769		0.0588873	0.0327289	-0.0617291	0.0506358	0.0966187	-0.125988	0.0850646	0.382385	1.05652	0.898859	-0.0268298	-0.324605	0.461242	-0.0677467	-0.585228	-0.624161	0.161927	0.0617434	0.433957	-0.0986211	-0.198668	-0.176846	-0.233967	-0.210222	0.101426
256	3.59212	3.48601	3.37097	4.45577	3.37097	4.45577	3.10974	3.59212	0.901762	4.825	3.76527	3.59212	6.70209	6.46031	4.59383	6.63348	3.41012	6.15686	0.823916	2.56193	2.09412	2.56193	2.56193		0.0425341	0.0818501	-0.0466553	-0.0172346	0.133287	-0.129068	0.0886734	0.352815	1.03706	0.874724	-0.0147129	-0.326045	0.528292	-0.0794178	-0.593859	-0.632186	0.227706	0.108059	0.462309	-0.104077	-0.202682	-0.204232	-0.309695	-0.306336	0.101968
257	3.71326	3.48215	3.34945	4.50372	3.34945	4.50372	3.25519	3.71326	0.809409	4.72811	3.8408	3.71326	6.147	5.79509	4.65348	6.87547	3.41056	6.41127	0.808962	1.96608	2.51358	1.96608	1.96608		0.0949615	0.0442663	-0.0179513	0.0338044	0.0842527	-0.12319	0.0773978	0.396904	1.13166	0.921159	0.00722375	-0.256726	0.469232	-0.0959338	-0.592886	-0.628	0.23081	0.0224649	0.434505	-0.0874801	-0.1273	-0.242896	-0.184225	-0.205694	0.0458056
258	3.59693	3.44084	3.42988	4.30832	3.42988	4.30832	3.04003	3.59693	0.832754	5.04439	3.8514	3.59693	6.14917	5.87634	4.46264	6.51124	3.40926	6.11074	0.748524	3.01272	2.5541	3.01272	3.01272		0.036692	0.0486444	-0.0220982	0.0864862	0.157599	-0.136812	0.0911849	0.417	1.10835	0.871816	-0.055321	-0.26375	0.483802	-0.166942	-0.581971	-0.621013	0.169636	0.0572547	0.428743	-0.0254571	-0.300606	-0.075619	-0.29943	-0.215978	0.132354
259	3.59499	3.47635	3.35241	4.48808	3.35241	4.48808	3.3701	3.59499	0.85473	5.1907	3.81401	3.59499	6.55418	6.33168	4.85395	6.78102	3.50922	6.23441	0.823741	1.84489	2.65091	1.84489	1.84489		0.0571615	0.0676906	-0.0901311	0.0187583	0.15927	-0.11794	0.0874577	0.409537	1.17041	0.804452	-0.022089	-0.300786	0.468397	-0.108696	-0.574703	-0.609624	0.168456	0.075303	0.463894	-0.0225932	-0.215976	-0.0686424	-0.195144	-0.209143	0.0379087
260	3.58073	3.49159	3.33933	4.45695	3.33933	4.45695	3.28824	3.58073	0.857434	4.82084	3.92108	3.58073	6.47863	6.6303	4.69364	6.81883	3.41568	6.34656	0.808532	2.99419	2.43955	2.99419	2.99419		0.0756203	0.0669517	-0.016283	-0.00662093	0.136578	-0.126183	0.0812004	0.401704	1.16863	0.948411	-0.0492215	-0.304015	0.523508	-0.107155	-0.591031	-0.621501	0.180289	0.0041507	0.462425	-0.0961508	-0.185638	-0.0964324	-0.201799	-0.235893	0.226245
261	3.60484	3.46556	3.40868	4.32539	3.40868	4.32539	3.21114	3.60484	0.812096	4.81252	3.99623	3.60484	6.44523	6.56409	4.65935	6.98559	3.45318	6.37781	0.829882	2.29284	2.7536	2.29284	2.29284		0.0601663	0.0861488	-0.121634	-0.0130176	0.0914362	-0.137786	0.0896289	0.408088	1.24411	0.963208	-0.0309993	-0.315923	0.500792	-0.0957125	-0.591818	-0.618965	0.219881	0.0829935	0.518162	-0.0932104	-0.199118	-0.043521	-0.127705	-0.228567	0.0494246
262	3.62147	3.49369	3.37343	4.45631	3.37343	4.45631	3.33738	3.62147	0.83248	5.0135	3.92357	3.62147	6.57186	6.53756	4.72885	7.28777	3.45491	6.26345	0.741365	1.91936	2.39142	1.91936	1.91936		0.0372897	0.0281601	-0.0618985	0.048692	0.087044	-0.138519	0.0915821	0.404678	1.10383	0.907921	-0.0261504	-0.312435	0.47258	-0.117277	-0.610374	-0.610751	0.166134	0.0793335	0.396561	-0.0703381	-0.24107	-0.0331143	-0.168963	-0.190899	0.0301983
263	3.51256	3.5123	3.34048	4.40723	3.34048	4.40723	3.33185	3.51256	0.86998	5.10952	3.87742	3.51256	6.30633	6.63169	4.76686	6.40772	3.39923	6.22632	0.827273	2.39282	2.84035	2.39282	2.39282		0.0937272	0.0486444	-0.08197	0.0644294	0.150705	-0.132719	0.0975226	0.397548	1.23766	0.947231	0.0215209	-0.228805	0.498278	-0.102745	-0.602459	-0.608499	0.195227	0.025398	0.473832	-0.0832551	-0.194118	-0.145017	-0.216975	-0.31069	0.129216
264	3.51149	3.45499	3.39955	4.57868	3.39955	4.57868	3.28217	3.51149	0.870099	4.75848	3.83707	3.51149	6.56683	6.50557	4.59288	6.74569	3.40253	6.12909	0.842084	2.87386	2.44972	2.87386	2.87386		0.0652487	0.00268569	-0.033445	0.0557677	0.121951	-0.141167	0.0805477	0.40126	1.12042	0.90143	0.00208987	-0.268767	0.53068	-0.124352	-0.615305	-0.610207	0.233132	0.0187342	0.46865	-0.076843	-0.160297	-0.0987684	-0.174972	-0.27022	0.0371156
265	3.54151	3.54984	3.35432	4.42282	3.35432	4.42282	3.07713	3.54151	0.864554	4.97545	3.95703	3.54151	6.94928	6.90287	4.83424	6.7958	3.44032	6.11068	0.782617	1.39384	2.09026	1.39384	1.39384		0.0340838	0.0340877	-0.140048	0.0495215	0.104202	-0.126658	0.0770006	0.419093	1.26825	0.944428	0.00602863	-0.245863	0.478817	-0.137077	-0.590245	-0.626445	0.17333	0.0245155	0.475516	-0.0975545	-0.180607	-0.0683603	-0.259803	-0.279437	-0.0156918
266	3.52318	3.52289	3.43651	4.54774	3.43651	4.54774	3.32764	3.52318	0.814715	4.97101	3.83727	3.52318	6.61066	6.5766	4.6847	7.13916	3.39683	6.3193	0.852727	3.1171	2.28563	3.1171	3.1171		0.0976815	-0.091695	-0.0855939	0.0460487	0.117399	-0.13279	0.0842227	0.420528	1.13698	0.986984	0.0280409	-0.144175	0.533309	-0.110483	-0.59625	-0.626479	0.199594	0.117534	0.450735	-0.0596208	-0.229237	-0.153395	-0.131361	-0.188525	0.111273
267	3.66075	3.42068	3.43297	4.49217	3.43297	4.49217	3.52611	3.66075	0.863339	5.54359	3.80377	3.66075	6.33727	6.93745	4.68171	7.25295	3.43861	6.21651	0.792416	2.33964	2.65271	2.33964	2.33964		0.0691583	0.0962003	-0.0156643	0.115399	0.149595	-0.12005	0.0748532	0.390462	1.24747	1.03338	0.0223222	-0.284122	0.570154	-0.0990585	-0.596703	-0.607695	0.187954	0.0189095	0.521746	-0.127031	-0.215423	-0.0838819	-0.188915	-0.166943	0.00946802
268	3.47649	3.54229	3.40772	4.61389	3.40772	4.61389	3.26219	3.47649	0.86404	5.06327	3.91783	3.47649	6.37373	7.2039	4.74637	6.69761	3.40963	6.10847	0.820909	2.7688	2.46327	2.7688	2.7688		0.0773796	0.0184105	-0.124768	0.0170219	0.117819	-0.135423	0.0924002	0.412614	1.09921	0.957601	0.0336775	-0.31335	0.567766	-0.139299	-0.607025	-0.61542	0.167749	0.0660059	0.504658	-0.087821	-0.182872	-0.101181	-0.265967	-0.182493	0.204076
269	3.55695	3.5137	3.41169	4.47303	3.41169	4.47303	3.23489	3.55695	0.792738	4.61899	3.91958	3.55695	6.75542	7.12312	4.55727	6.84198	3.45685	6.11309	0.81671	3.41042	2.50439	3.41042	3.41042		0.0573514	0.0662604	-0.0941491	0.00756718	0.0884247	-0.12794	0.0948883	0.402355	1.21083	0.885811	0.0129973	-0.31889	0.511862	-0.0906141	-0.587199	-0.628485	0.17805	0.145502	0.364397	-0.096132	-0.183162	-0.0700956	-0.277967	-0.200235	0.0870277
270	3.51747	3.50735	3.39049	4.55379	3.39049	4.55379	3.02739	3.51747	0.831795	5.38787	3.91266	3.51747	6.43033	6.5332	4.65067	6.92869	3.51867	6.37313	0.752502	1.94436	2.27372	1.94436	1.94436		0.0539556	0.0625497	-0.116692	0.072965	0.0450234	-0.127081	0.0854996	0.431748	1.15617	1.04193	0.0662438	-0.0962316	0.506385	-0.0902561	-0.573239	-0.605768	0.150722	0.0601708	0.499704	-0.0407216	-0.205398	-0.0856738	-0.175861	-0.246435	0.107108
271	3.50003	3.49297	3.42468	4.47658	3.42468	4.47658	3.03964	3.50003	0.759689	5.44537	3.9565	3.50003	6.56297	6.46588	4.69658	7.04629	3.48399	6.18393	0.845346	2.08873	2.4792	2.08873	2.08873		0.0657682	0.0408178	-0.0275783	-0.00325385	0.11935	-0.125462	0.0816546	0.440306	1.16249	1.01887	0.0232455	-0.185573	0.509257	-0.126957	-0.588367	-0.633572	0.139595	0.123245	0.436418	-0.0970607	-0.191927	-0.127852	-0.153831	-0.229341	0.0664795
272	3.54529	3.48743	3.36976	4.41874	3.36976	4.41874	3.271	3.54529	0.78134	5.29907	3.92205	3.54529	6.64487	6.51438	4.70649	7.03678	3.43445	6.45442	0.8526	2.77095	2.21384	2.77095	2.77095		0.0955647	0.0798319	-0.0852772	0.0981694	0.132316	-0.14401	0.07605	0.415121	1.15681	0.917048	0.0315044	-0.254021	0.540357	-0.154878	-0.581036	-0.613747	0.216186	0.117447	0.528828	-0.10341	-0.184998	-0.133368	-0.220638	-0.214862	0.0424899
273	3.4168	3.52215	3.36359	4.52522	3.36359	4.52522	3.34187	3.4168	0.815639	4.91004	3.87639	3.4168	6.71088	6.85965	4.63668	7.05111	3.50155	6.60085	0.785576	3.3156	2.43009	3.3156	3.3156		0.0563405	0.0845199	-0.0564627	-0.0107891	0.0524671	-0.129674	0.0679432	0.420949	1.27127	0.897889	0.0345336	-0.204071	0.565428	-0.122699	-0.583973	-0.625194	0.160984	0.0738718	0.463036	-0.0911599	-0.179539	-0.0989474	-0.227632	-0.151716	0.0833307
274	3.53286	3.50157	3.42326	4.28865	3.42326	4.28865	3.04178	3.53286	0.880898	5.22753	3.92304	3.53286	6.63554	6.98595	4.85944	7.0664	3.46357	6.03598	0.73042	3.57832	2.68523	3.57832	3.57832		0.0875222	-0.0251724	-0.0715402	0.0794918	0.0780296	-0.142359	0.0738742	0.425335	1.14715	0.950478	0.0665633	-0.139811	0.517923	-0.122418	-0.582844	-0.629172	0.272371	0.0957555	0.501474	-0.0878762	-0.255277	-0.0402567	-0.279535	-0.231131	-0.0194365
275	3.47568	3.57144	3.37461	4.52212	3.37461	4.52212	3.33869	3.47568	0.804788	5.1265	4.00407	3.47568	7.12441	6.29904	4.66475	7.00627	3.44591	6.08519	0.845361	2.28499	2.63432	2.28499	2.28499		0.0786753	0.0684216	-0.0790053	0.132495	0.18012	-0.116388	0.0859774	0.432169	1.26623	0.936461	0.0481781	-0.197134	0.512104	-0.149432	-0.565316	-0.607728	0.275084	0.0709557	0.371533	-0.0890142	-0.206905	-0.154118	-0.201349	-0.297458	0.0486488
276	3.42361	3.37835	3.4592	4.36602	3.4592	4.36602	3.14312	3.42361	0.869876	5.1486	3.91877	3.42361	6.59338	6.76691	4.69367	7.25041	3.42859	6.25244	0.876733	2.21147	2.5647	2.21147	2.21147		0.0750394	0.130121	-0.118084	-0.00660873	0.0955582	-0.136401	0.0954604	0.438331	1.16888	1.01734	0.0258059	-0.171265	0.524076	-0.173999	-0.558679	-0.619656	0.261949	-0.00378874	0.485028	-0.0881569	-0.182588	-0.23322	-0.244543	-0.281766	-0.00229921
277	3.50251	3.46889	3.40533	4.51469	3.40533	4.51469	3.23751	3.50251	0.875764	4.88769	3.95954	3.50251	6.78881	6.78305	4.79771	6.76947	3.50192	6.14415	0.841973	2.61494	2.69557	2.61494	2.61494		0.0976982	0.0556129	-0.150014	0.125415	0.124973	-0.134595	0.0898606	0.432554	1.20631	1.00292	0.0346764	-0.251883	0.591109	-0.169063	-0.576191	-0.625771	0.274218	0.131323	0.526255	-0.0378276	-0.241319	-0.144102	-0.243402	-0.282898	0.0351045
278	3.4508	3.53121	3.42839	4.47466	3.42839	4.47466	3.04495	3.4508	0.895259	5.02459	3.89486	3.4508	6.37713	6.59441	4.48202	5.93186	3.46438	6.17014	0.775219	2.9916	2.35878	2.9916	2.9916		0.0835567	0.0809046	-0.069905	0.0509204	0.0943176	-0.131143	0.0942262	0.4535	1.16341	1.09469	0.041454	-0.156913	0.559042	-0.199293	-0.552337	-0.622412	0.279958	0.0288628	0.452303	-0.0812598	-0.151963	-0.122692	-0.243445	-0.299564	0.114389
279	3.48534	3.50781	3.4632	4.33144	3.4632	4.33144	2.97081	3.48534	0.903576	5.15426	3.88853	3.48534	6.24506	6.27483	4.42866	6.61109	3.44818	5.65594	0.807021	2.89886	2.51744	2.89886	2.89886		0.0956262	0.114086	-0.110339	0.0806833	0.0993801	-0.13836	0.0900969	0.402237	1.14428	1.02258	0.0607155	-0.140335	0.637095	-0.149728	-0.601252	-0.630041	0.266669	0.0480962	0.485589	-0.0894241	-0.206974	-0.141292	-0.243257	-0.228046	0.00931632
280	3.40307	3.5156	3.43475	4.51474	3.43475	4.51474	3.19106	3.40307	0.782641	5.12361	3.94681	3.40307	6.41805	6.56409	4.58868	6.27864	3.41179	5.85279	0.823137	2.39006	3.03871	2.39006	2.39006		0.0853607	0.110058	-0.118923	0.0724811	0.168754	-0.126816	0.0738931	0.441274	1.24316	1.00903	0.0439811	-0.210048	0.615738	-0.151065	-0.566002	-0.604942	0.282275	0.0930515	0.572287	-0.117441	-0.145943	-0.159885	-0.204868	-0.261502	0.0766214
281	3.58827	3.52812	3.44922	4.6073	3.44922	4.6073	3.19554	3.58827	0.886513	5.31523	4.03743	3.58827	6.5153	6.39224	4.82884	6.95482	3.45802	6.16742	0.780103	2.92041	2.19719	2.92041	2.92041		0.0843945	0.111822	-0.148788	0.176767	0.130335	-0.124935	0.0832531	0.465519	1.36401	1.05962	0.0619178	-0.273826	0.549649	-0.180716	-0.569717	-0.606826	0.178993	0.0883676	0.477946	-0.138632	-0.212199	-0.168481	-0.225704	-0.317607	-0.0253006
282	3.55281	3.51919	3.44954	4.47967	3.44954	4.47967	3.35916	3.55281	0.870133	4.99612	3.90106	3.55281	6.4808	7.26102	4.68698	6.82663	3.42747	6.23467	0.835244	2.39894	2.70867	2.39894	2.39894		0.102446	0.104416	-0.111002	0.0517825	0.153637	-0.136044	0.090622	0.420062	1.29229	1.03892	0.0857635	-0.256768	0.569035	-0.153074	-0.588414	-0.612971	0.110347	0.110093	0.484831	-0.131569	-0.210732	-0.229015	-0.178506	-0.271243	0.0709913
283	3.60214	3.46527	3.36942	4.62909	3.36942	4.62909	3.25842	3.60214	0.820431	5.14965	3.88975	3.60214	6.45219	6.38779	4.74801	7.10408	3.47014	6.23757	0.846793	2.82275	2.68839	2.82275	2.82275		0.0764748	0.00652354	-0.0690175	0.0423848	0.0393206	-0.121056	0.0898322	0.450557	1.45604	0.957834	0.0422422	-0.166424	0.571965	-0.141497	-0.581971	-0.624641	0.0379232	0.114672	0.510752	-0.102763	-0.226194	-0.198472	-0.240665	-0.236961	0.157362
284	3.47752	3.50045	3.49259	4.49581	3.49259	4.49581	3.13732	3.47752	0.78656	4.92303	3.90155	3.47752	6.33559	6.07415	4.61805	6.38648	3.44365	6.3916	0.770669	2.13855	2.29254	2.13855	2.13855		0.0878405	0.0823825	-0.114802	-0.0095041	0.130926	-0.133019	0.0723704	0.453323	1.26941	1.04906	0.060186	-0.279584	0.577384	-0.0985564	-0.568876	-0.593551	0.120212	0.044719	0.43764	-0.0912239	-0.24719	-0.142086	-0.331649	-0.286775	-0.03432
285	3.60611	3.44349	3.31792	4.70237	3.31792	4.70237	2.96911	3.60611	0.741359	5.09462	3.95419	3.60611	6.16501	6.30571	4.60498	6.7899	3.47483	6.11777	0.805605	2.62028	2.76317	2.62028	2.62028		0.09089	0.203708	-0.114648	-0.0294545	0.226292	-0.133839	0.0808838	0.428827	1.36523	0.964894	0.0743332	-0.248656	0.541083	-0.121976	-0.587261	-0.591852	0.253892	0.09291	0.516069	-0.119506	-0.203703	-0.113777	-0.117375	-0.253665	0.0689413
286	3.42101	3.49448	3.30682	4.44623	3.30682	4.44623	3.25661	3.42101	0.905562	5.17528	3.88004	3.42101	6.25468	6.58096	4.67555	6.65358	3.43046	6.01555	0.756924	2.35696	2.32936	2.35696	2.35696		0.0824788	0.135564	-0.0946868	0.00766071	0.108134	-0.139619	0.0841708	0.449425	1.33785	1.01044	0.0533191	-0.217115	0.530546	-0.127765	-0.596095	-0.591747	0.41155	0.11048	0.511839	-0.104721	-0.26371	-0.14309	-0.127485	-0.30279	-0.0465033
287	3.47254	3.49621	3.48173	4.61001	3.48173	4.61001	3.06536	3.47254	0.857503	5.4687	3.97717	3.47254	6.20438	6.17894	4.67084	6.89406	3.49651	6.41355	0.808262	3.19511	2.72738	3.19511	3.19511		0.0863158	0.15527	-0.081377	0.0221579	0.146983	-0.140213	0.0861762	0.452095	1.28022	1.10099	0.0364485	-0.233211	0.648725	-0.171966	-0.615313	-0.591299	0.254952	0.0749155	0.402292	-0.114082	-0.197307	-0.150086	-0.209918	-0.308632	0.0341727
288	3.53828	3.45617	3.35895	4.43595	3.35895	4.43595	3.10164	3.53828	0.817984	4.96489	3.98148	3.53828	6.34083	6.49703	4.43829	6.34061	3.46526	6.20051	0.832094	3.42671	2.99977	3.42671	3.42671		0.0813115	0.140919	-0.0853619	-0.00134665	0.131426	-0.125937	0.0953233	0.448871	1.28389	1.03249	0.0315996	-0.256421	0.572842	-0.118935	-0.603628	-0.567205	0.117852	0.0361828	0.463826	-0.0755546	-0.188585	-0.0761438	-0.176798	-0.369062	0.102271
289	3.59282	3.50811	3.4046	4.56476	3.4046	4.56476	3.35007	3.59282	0.854251	5.07118	3.96206	3.59282	6.42583	6.6125	4.58338	6.7925	3.46127	6.03351	0.765276	2.04753	2.05039	2.04753	2.04753		0.0862655	0.0921082	-0.117008	-0.0271122	0.136288	-0.119951	0.0980382	0.458656	1.45335	0.970902	0.0423779	-0.202892	0.598957	-0.108661	-0.567645	-0.585955	0.220471	0.169756	0.437541	-0.0531673	-0.260977	-0.145977	-0.289565	-0.369869	0.0432484
290	3.47842	3.50612	3.41782	4.61709	3.41782	4.61709	3.13158	3.47842	0.870954	5.02187	3.99452	3.47842	6.66382	6.34597	4.45856	6.52463	3.5085	6.15186	0.826048	1.40238	2.37407	1.40238	1.40238		0.0985863	0.22064	-0.141529	0.0228695	0.18053	-0.128677	0.0780837	0.457398	1.39557	1.0397	0.0193132	-0.241719	0.584497	-0.113412	-0.585243	-0.603146	0.245715	0.146916	0.530777	-0.087628	-0.154604	-0.215881	-0.193381	-0.313696	0.0770635
291	3.48634	3.47307	3.43441	4.50013	3.43441	4.50013	3.1116	3.48634	0.820071	5.06795	3.93908	3.48634	6.345	6.02732	4.3405	6.80512	3.43612	6.01384	0.825889	3.69632	2.19871	3.69632	3.69632		0.0762905	0.174443	-0.053428	0.109072	0.173346	-0.11811	0.0875667	0.443708	1.49613	1.09787	0.037019	-0.148755	0.554166	-0.103332	-0.572685	-0.560604	0.308263	0.0236302	0.473635	-0.141111	-0.189845	-0.195131	-0.237516	-0.303847	-0.0260417
292	3.56293	3.46151	3.39243	4.57671	3.39243	4.57671	3.21634	3.56293	0.814184	5.18186	3.88162	3.56293	6.12793	6.71368	4.44236	6.71791	3.45847	5.96178	0.763685	3.07357	2.55861	3.07357	3.07357		0.115805	0.194212	-0.134627	0.0686586	0.205652	-0.144714	0.0845017	0.455431	1.45635	1.04566	0.0197481	-0.25773	0.577934	-0.151739	-0.614254	-0.612081	0.145219	0.0909301	0.492622	-0.087153	-0.206537	-0.0864545	-0.213832	-0.260943	0.133949
293	3.47872	3.5242	3.34736	4.53682	3.34736	4.53682	2.84424	3.47872	0.832361	5.01489	4.01259	3.47872	6.29745	6.3876	4.3519	6.81235	3.45367	6.18184	0.790301	3.21855	2.41214	3.21855	3.21855		0.101172	0.107777	-0.0525552	0.029624	0.132406	-0.125434	0.0947464	0.485726	1.34457	1.04499	0.0311582	-0.182432	0.619871	-0.101042	-0.586256	-0.578929	0.330088	0.105372	0.427423	-0.125539	-0.196437	-0.1632	-0.267155	-0.305555	0.141382
294	3.51523	3.48872	3.42352	4.48592	3.42352	4.48592	2.9933	3.51523	0.860343	5.30658	3.87805	3.51523	6.28922	5.89645	4.48928	6.72444	3.47794	6.24168	0.826827	3.11184	2.4668	3.11184	3.11184		0.0898176	0.115096	-0.0448876	0.0757344	0.194127	-0.125929	0.0908586	0.450424	1.31503	1.04164	0.0609874	-0.200842	0.541641	-0.120417	-0.612664	-0.579014	0.167629	0.0438026	0.40315	-0.100985	-0.21325	-0.0497109	-0.152165	-0.237133	-0.0314594
295	3.47532	3.53655	3.38288	4.68442	3.38288	4.68442	3.41995	3.47532	0.836896	5.31368	3.93519	3.47532	6.34099	6.36683	4.44811	7.03817	3.52433	6.16945	0.780278	2.05744	2.42378	2.05744	2.05744		0.100977	0.158949	-0.074921	0.0750105	0.161711	-0.122774	0.0873774	0.468145	1.31552	1.01152	0.0450537	-0.129779	0.616431	-0.131442	-0.584363	-0.586887	0.312906	0.0445437	0.443123	-0.0959001	-0.207713	-0.116088	-0.267792	-0.293495	-0.0836296
296	3.48851	3.42937	3.46519	4.40851	3.46519	4.40851	3.29103	3.48851	0.843279	5.24601	3.93316	3.48851	6.23667	6.50724	4.51366	6.77169	3.51985	6.01396	0.842291	3.19735	2.21411	3.19735	3.19735		0.057491	0.184614	-0.143098	0.10906	0.167053	-0.120517	0.112837	0.440845	1.47144	1.06794	0.0375556	-0.341227	0.527757	-0.123141	-0.600488	-0.595948	0.225191	0.110181	0.453196	-0.0747136	-0.212214	-0.160729	-0.240466	-0.268464	-0.0763483
297	3.40614	3.5226	3.43017	4.55473	3.43017	4.55473	3.04413	3.40614	0.82969	4.91633	3.91822	3.40614	6.24301	6.51669	4.24524	6.65523	3.47376	6.07501	0.765674	2.77328	2.80886	2.77328	2.77328		0.101077	0.167856	-0.0875163	0.0368502	0.128664	-0.130094	0.0913977	0.508551	1.49977	1.13883	0.0495434	-0.261132	0.570295	-0.0899404	-0.597669	-0.592935	0.302683	0.0440657	0.379424	-0.0680144	-0.214668	-0.114673	-0.259305	-0.334936	-0.00197415
298	3.68347	3.48171	3.38848	4.59599	3.38848	4.59599	3.12331	3.68347	0.834637	5.07095	3.96873	3.68347	6.09952	6.39818	4.41411	6.25428	3.42768	6.21537	0.803187	2.00892	2.63427	2.00892	2.00892		0.120351	0.219385	-0.107521	-0.00445754	0.102922	-0.14306	0.0839958	0.506066	1.44978	1.01329	0.0389144	-0.234128	0.626993	-0.138126	-0.609806	-0.579398	0.252437	0.11674	0.433315	-0.0880429	-0.162435	-0.135052	-0.317791	-0.318779	0.033943
299	3.42031	3.52663	3.43219	4.6132	3.43219	4.6132	3.05425	3.42031	0.856681	4.79866	3.87146	3.42031	6.40684	6.11607	4.39494	7.04242	3.43884	6.1857	0.862479	2.0159	2.0046	2.0159	2.0159
[truncated: 105 more columns]

## Sheet: C
Genotype	Condition	Peak
WT	Baseline	0.0729355
WT	Baseline	0.130721
WT	Baseline	0.0439458
WT	Baseline	0.0420545
WT	Baseline	0.0801896
WT	Baseline	0.0472181
WT	Baseline	0.0569066
WT	Baseline	0.0473509
WT	Baseline	0.0558831
WT	Baseline	0.0390163
WT	Baseline	0.214678
WT	Baseline	0.0268663
WT	Baseline	0.118779
WT	Baseline	0.0710376
WT	Baseline	0.133086
WT	Baseline	0.0974425
WT	Baseline	0.0476078
WT	Baseline	0.144216
WT	Baseline	0.0650534
WT	Baseline	0.053739
WT	Baseline	0.0683814
WT	Baseline	0.277784
WT	Baseline	0.658344
WT	Baseline	0.0920777
WT	Baseline	0.189862
WT	Baseline	0.0657984
WT	Baseline	0.100407
WT	Baseline	0.131127
WT	Baseline	0.133959
WT	Baseline	0.0849934
WT	Baseline	0.0354205
WT	Baseline	0.0929499
WT	Baseline	0.138282
WT	Baseline	0.166894
WT	Baseline	0.138282
WT	Baseline	0.166894
WT	Baseline	0.171297
WT	Baseline	0.133959
WT	Baseline	0.0454985
WT	Baseline	0.0586379
WT	Baseline	0.157563
WT	Baseline	0.186617
WT	Baseline	0.133959
WT	Baseline	0.111115
WT	Baseline	0.199487
WT	Baseline	0.124235
WT	Baseline	0.034906
WT	Baseline	0.168723
WT	Baseline	0.095274
WT	Baseline	0.168721
WT	Baseline	0.187579
WT	Baseline	0.100179
WT	Baseline	0.0975187
WT	Baseline	0.0444656
WT	Baseline	0.141626
WT	Baseline	0.0646112
WT	Baseline	0.110501
WT	Baseline	0.0956262
WT	Baseline	0.165676
WT	Baseline	0.147412
WT	Baseline	1.03539
WT	Baseline	0.819255
WT	Baseline	0.554535
WT	Baseline	0.654519
WT	Baseline	0.358179
WT	Baseline	0.664456
WT	Baseline	0.664456
WT	Baseline	0.37232
WT	Baseline	0.383807
WT	Baseline	0.385747
WT	Baseline	0.929618
WT	Baseline	0.441925
WT	Baseline	0.607807
WT	Baseline	0.223765
WT	Baseline	0.31861
WT	Baseline	0.37829
WT	Baseline	0.532286
WT	Baseline	0.302963
WT	Baseline	0.230098
WT	Baseline	0.43441
WT	Baseline	0.284021
WT	Baseline	0.156114
WT	Baseline	0.145355
WT	Baseline	0.519143
WT	Baseline	0.346448
WT	Baseline	0.610428
WT	Baseline	0.519143
WT	Baseline	0.346448
WT	Baseline	0.610428
WT	Baseline	0.374805
WT	Baseline	0.819255
WT	Baseline	0.554535
WT	Baseline	0.554535
WT	Baseline	0.358179
WT	Baseline	1.03539
WT	Baseline	1.03539
WT	Baseline	0.383807
WT	Baseline	0.654519
WT	Baseline	0.374689
WT	Baseline	0.664456
WT	Baseline	0.664456
WT	Baseline	0.929618
WT	Baseline	0.667342
WT	Baseline	0.607807
WT	Baseline	0.37232
WT	Baseline	0.223765
WT	Baseline	0.385747
WT	Baseline	0.37829
WT	Baseline	0.37829
WT	Baseline	0.441925
WT	Baseline	0.441925
WT	Baseline	0.230098
WT	Baseline	0.32053
WT	Baseline	0.19741
WT	Baseline	0.532286
WT	Baseline	0.532286
WT	Baseline	0.302963
WT	Baseline	0.43441
WT	Baseline	0.284021
WT	Baseline	0.610428
WT	Baseline	0.156114
WT	Baseline	0.519143
WT	Baseline	0.346448
WT	Baseline	0.610428
WT	KCl	1.64197
WT	KCl	0.69883
WT	KCl	0.369772
WT	KCl	0.384838
WT	KCl	0.330587
WT	KCl	0.290235
WT	KCl	0.206214
WT	KCl	0.124597
WT	KCl	0.260808
WT	KCl	0.156932
WT	KCl	0.314028
WT	KCl	0.0935974
WT	KCl	0.262476
WT	KCl	0.51769
WT	KCl	0.916073
WT	KCl	0.255945
WT	KCl	0.234489
WT	KCl	0.170273
WT	KCl	0.447183
WT	KCl	0.385211
WT	KCl	0.484788
WT	KCl	4.54992
WT	KCl	0.938053
WT	KCl	4.7915
WT	KCl	3.95327
WT	KCl	0.742186
WT	KCl	1.39991
WT	KCl	1.45128
WT	KCl	4.42958
WT	KCl	0.482475
WT	KCl	0.1962
WT	KCl	3.58195
WT	KCl	3.49259
WT	KCl	4.7336
WT	KCl	3.49259
WT	KCl	4.7336
WT	KCl	4.96083
WT	KCl	4.42958
WT	KCl	0.399448
WT	KCl	1.64488
WT	KCl	6.02095
WT	KCl	4.29919
WT	KCl	4.42958
WT	KCl	8.74641
WT	KCl	8.63542
WT	KCl	7.11148
WT	KCl	0.23881
WT	KCl	8.92646
WT	KCl	3.6009
WT	KCl	6.60085
WT	KCl	1.29736
WT	KCl	1.61103
WT	KCl	1.16383
WT	KCl	0.440908
WT	KCl	0.2116
WT	KCl	0.348792
WT	KCl	0.2951
WT	KCl	0.298356
WT	KCl	0.380756
WT	KCl	0.364265
WT	KCl	12.9366
WT	KCl	7.84886
WT	KCl	6.46265
WT	KCl	1.23851
WT	KCl	1.59284
WT	KCl	11.2548
WT	KCl	11.2548
WT	KCl	2.55439
WT	KCl	2.21626
WT	KCl	1.03881
WT	KCl	7.76341
WT	KCl	3.72442
WT	KCl	3.33875
WT	KCl	1.23594
WT	KCl	0.873734
WT	KCl	4.14347
WT	KCl	2.84493
WT	KCl	2.39796
WT	KCl	0.851655
WT	KCl	1.1041
WT	KCl	1.18173
WT	KCl	2.19198
WT	KCl	0.751606
WT	KCl	4.61925
WT	KCl	2.00008
WT	KCl	1.85651
WT	KCl	4.61925
WT	KCl	2.00008
WT	KCl	1.85651
WT	KCl	1.02693
WT	KCl	7.84886
WT	KCl	6.46265
WT	KCl	6.46265
WT	KCl	1.59284
WT	KCl	12.9366
WT	KCl	12.9366
WT	KCl	2.21626
WT	KCl	1.23851
WT	KCl	0.400547
WT	KCl	11.2548
WT	KCl	11.2548
WT	KCl	7.76341
WT	KCl	6.28305
WT	KCl	3.33875
WT	KCl	2.55439
WT	KCl	1.23594
WT	KCl	1.03881
WT	KCl	4.14347
WT	KCl	4.14347
WT	KCl	3.72442
WT	KCl	3.72442
WT	KCl	0.851655
WT	KCl	1.23757
WT	KCl	1.08543
WT	KCl	2.84493
WT	KCl	2.84493
WT	KCl	2.39796
WT	KCl	1.1041
WT	KCl	1.18173
WT	KCl	1.85651
WT	KCl	2.19198
WT	KCl	4.61925
WT	KCl	2.00008
WT	KCl	1.85651
E180A	Baseline	0.0496182
E180A	Baseline	0.245346
E180A	Baseline	0.189439
E180A	Baseline	0.0856787
E180A	Baseline	0.137869
E180A	Baseline	0.117149
E180A	Baseline	0.142835
E180A	Baseline	0.37024
E180A	Baseline	0.195426
E180A	Baseline	0.0647831
E180A	Baseline	0.0748025
E180A	Baseline	0.101245
E180A	Baseline	0.198384
E180A	Baseline	0.152815
E180A	Baseline	0.0903371
E180A	Baseline	0.0874729
E180A	Baseline	0.0647831
E180A	Baseline	0.0874729
E180A	Baseline	0.128056
E180A	Baseline	0.0952918
E180A	Baseline	0.117068
E180A	Baseline	0.106465
E180A	Baseline	0.0634569
E180A	Baseline	0.0869548
E180A	Baseline	0.109171
E180A	Baseline	0.0521264
E180A	Baseline	0.0574753
E180A	Baseline	0.076056
E180A	Baseline	0.0164268
E180A	Baseline	0.0521264
E180A	Baseline	0.0630523
E180A	Baseline	0.123422
E180A	Baseline	0.0787758
E180A	Baseline	0.0521264
E180A	Baseline	0.0648344
E180A	Baseline	0.0507844
E180A	Baseline	0.0431148
E180A	Baseline	0.0238034
E180A	Baseline	0.0512686
E180A	Baseline	0.200312
E180A	Baseline	0.226317
E180A	Baseline	0.186341
E180A	Baseline	0.208001
E180A	Baseline	0.253132
E180A	Baseline	0.174082
E180A	Baseline	0.286722
E180A	Baseline	0.204859
E180A	Baseline	0.186006
E180A	Baseline	0.165185
E180A	Baseline	0.199772
E180A	Baseline	0.123357
E180A	Baseline	0.160379
E180A	Baseline	0.407733
E180A	Baseline	0.110998
E180A	Baseline	0.307092
E180A	Baseline	0.407733
E180A	Baseline	0.189979
E180A	Baseline	0.216792
E180A	Baseline	0.132729
E180A	Baseline	0.172701
E180A	Baseline	0.142023
E180A	Baseline	0.152927
E180A	Baseline	0.159088
E180A	Baseline	0.187627
E180A	Baseline	0.312759
E180A	Baseline	0.199426
E180A	Baseline	0.0870845
E180A	Baseline	0.163385
E180A	Baseline	0.0609504
E180A	Baseline	0.043058
E180A	Baseline	0.076568
E180A	Baseline	0.226649
E180A	Baseline	0.212183
E180A	Baseline	0.195528
E180A	Baseline	0.464629
E180A	Baseline	0.489127
E180A	Baseline	0.0531584
E180A	Baseline	0.312759
E180A	Baseline	0.199426
E180A	Baseline	0.0460866
E180A	Baseline	0.0276358
E180A	Baseline	0.0937244
E180A	Baseline	0.0675927
E180A	Baseline	0.0902475
E180A	Baseline	0.102344
E180A	Baseline	0.0733828
E180A	Baseline	0.0902475
E180A	Baseline	0.0530513
E180A	Baseline	0.0902475
E180A	Baseline	0.102344
E180A	Baseline	0.066182
E180A	Baseline	0.139525
E180A	Baseline	0.109976
E180A	Baseline	0.0884408
E180A	Baseline	0.101624
E180A	Baseline	0.155183
E180A	Baseline	0.146338
E180A	Baseline	0.129492
E180A	Baseline	0.105168
E180A	Baseline	0.0884424
E180A	Baseline	0.0736303
E180A	Baseline	0.122841
E180A	Baseline	0.0845694
E180A	Baseline	0.0972541
E180A	Baseline	0.0872894
E180A	Baseline	0.0640003
E180A	Baseline	0.0990701
E180A	Baseline	0.0902475
E180A	Baseline	0.0534245
E180A	Baseline	0.0292476
E180A	Baseline	0.0545212
E180A	Baseline	0.0621926
E180A	Baseline	0.0418247
E180A	Baseline	0.0277659
E180A	Baseline	0.0420714
E180A	Baseline	0.0442293
E180A	Baseline	0.0325881
E180A	Baseline	0.0378175
E180A	Baseline	0.0390229
E180A	Baseline	0.0286838
E180A	Baseline	0.0653421
E180A	Baseline	0.0686291
E180A	Baseline	0.0813161
E180A	Baseline	0.0449095
E180A	Baseline	0.0860236
E180A	Baseline	0.0973391
E180A	Baseline	0.0882717
E180A	Baseline	0.112493
E180A	Baseline	0.0624376
E180A	Baseline	0.0949388
E180A	Baseline	0.260475
E180A	Baseline	0.15501
E180A	Baseline	0.203313
E180A	Baseline	0.136472
E180A	Baseline	0.0651235
E180A	Baseline	0.0917394
E180A	Baseline	0.0669101
E180A	Baseline	0.0398101
E180A	Baseline	0.0719876
E180A	Baseline	0.0532417
E180A	Baseline	0.152919
E180A	Baseline	0.0847699
E180A	Baseline	0.111317
E180A	Baseline	0.100751
E180A	Baseline	0.117594
E180A	Baseline	0.0234966
E180A	Baseline	0.0556774
E180A	Baseline	0.0402346
E180A	Baseline	0.0876933
E180A	Baseline	0.0663757
E180A	Baseline	0.0857229
E180A	Baseline	0.103917
E180A	Baseline	0.178011
E180A	Baseline	0.114701
E180A	Baseline	0.122557
E180A	Baseline	0.199686
E180A	Baseline	0.0764943
E180A	Baseline	0.0850029
E180A	Baseline	0.117694
E180A	Baseline	0.037158
E180A	Baseline	0.143435
E180A	Baseline	0.213416
E180A	Baseline	0.081927
E180A	Baseline	0.135047
E180A	Baseline	0.126176
E180A	Baseline	0.107305
E180A	Baseline	0.128631
E180A	Baseline	0.0653525
E180A	Baseline	0.0858841
E180A	Baseline	0.0629276
E180A	Baseline	0.0986428
E180A	Baseline	0.0658896
E180A	Baseline	0.110609
E180A	Baseline	0.0905488
E180A	Baseline	0.126176
E180A	Baseline	0.0952663
E180A	Baseline	0.0980625
E180A	Baseline	0.271203
E180A	Baseline	0.0340219
E180A	Baseline	0.12471
E180A	Baseline	0.088527
E180A	Baseline	0.0713234
E180A	Baseline	0.0481435
E180A	Baseline	0.0425856
E180A	Baseline	0.0675838
E180A	Baseline	0.0630265
E180A	Baseline	0.0510324
E180A	Baseline	0.0871999
E180A	Baseline	0.0546402
E180A	Baseline	0.12732
E180A	Baseline	0.139837
E180A	Baseline	0.0925235
E180A	Baseline	0.0680746
E180A	Baseline	0.105898
E180A	Baseline	0.106913
E180A	Baseline	0.205868
E180A	Baseline	0.0871999
E180A	Baseline	0.0826492
E180A	Baseline	0.0747006
E180A	Baseline	0.0364433
E180A	Baseline	0.034384
E180A	Baseline	0.0490775
E180A	Baseline	0.0721483
E180A	Baseline	0.174776
E180A	Baseline	0.133948
E180A	Baseline	0.209392
E180A	Baseline	0.0729576
E180A	Baseline	0.102586
E180A	Baseline	0.259258
E180A	Baseline	0.247851
E180A	Baseline	0.084324
E180A	Baseline	0.188128
E180A	Baseline	0.0826492
E180A	Baseline	0.0826492
E180A	Baseline	0.185249
E180A	Baseline	0.189428
E180A	Baseline	0.111644
E180A	Baseline	0.126308
E180A	Baseline	0.152787
E180A	Baseline	0.16369
E180A	Baseline	0.0977112
E180A	Baseline	0.129383
E180A	Baseline	0.260902
E180A	KCl	0.57889
E180A	KCl	0.505779
E180A	KCl	0.228234
E180A	KCl	0.867405
E180A	KCl	0.248428
E180A	KCl	0.371626
E180A	KCl	0.418912
E180A	KCl	0.375442
E180A	KCl	1.83667
E180A	KCl	0.104462
E180A	KCl	0.129273
E180A	KCl	2.41207
E180A	KCl	2.5251
E180A	KCl	3.35301
E180A	KCl	0.662954
E180A	KCl	0.831809
E180A	KCl	0.104462
E180A	KCl	0.831809
E180A	KCl	0.760379
E180A	KCl	0.755903
E180A	KCl	0.344488
E180A	KCl	0.168726
E180A	KCl	0.121879
E180A	KCl	1.20426
E180A	KCl	1.60494
E180A	KCl	0.433795
E180A	KCl	0.890991
E180A	KCl	0.274107
E180A	KCl	0.0188564
E180A	KCl	0.433795
E180A	KCl	0.193999
E180A	KCl	0.11588
E180A	KCl	0.813817
E180A	KCl	0.433795
E180A	KCl	0.115147
E180A	KCl	0.0202686
E180A	KCl	0.435701
E180A	KCl	0.343511
E180A	KCl	0.114624
E180A	KCl	1.01163
E180A	KCl	0.842861
E180A	KCl	0.557131
E180A	KCl	0.465111
E180A	KCl	0.704576
E180A	KCl	0.54258
E180A	KCl	0.620476
E180A	KCl	0.634671
E180A	KCl	0.566323
E180A	KCl	0.509332
E180A	KCl	0.466836
E180A	KCl	0.395689
E180A	KCl	0.401784
E180A	KCl	0.919328
E180A	KCl	0.0772271
E180A	KCl	0.507576
E180A	KCl	0.919328
E180A	KCl	0.177343
E180A	KCl	0.392836
E180A	KCl	0.363208
E180A	KCl	0.479903
E180A	KCl	0.372768
E180A	KCl	0.494178
E180A	KCl	0.26812
E180A	KCl	0.191301
E180A	KCl	0.362762
E180A	KCl	0.081736
E180A	KCl	0.0586621
E180A	KCl	0.182153
E180A	KCl	0.0912503
E180A	KCl	0.0646804
E180A	KCl	0.137717
E180A	KCl	0.433243
E180A	KCl	0.568578
E180A	KCl	0.352266
E180A	KCl	1.07244
E180A	KCl	1.12314
E180A	KCl	0.0630319
E180A	KCl	0.362762
E180A	KCl	0.081736
E180A	KCl	0.120004
E180A	KCl	0.0551215
E180A	KCl	0.376961
E180A	KCl	0.18836
E180A	KCl	0.760152
E180A	KCl	0.546593
E180A	KCl	0.0446622
E180A	KCl	0.760152
E180A	KCl	0.037325
E180A	KCl	0.760152
E180A	KCl	0.546593
E180A	KCl	0.0001764
E180A	KCl	0.277196
E180A	KCl	0.2071
E180A	KCl	0.122459
E180A	KCl	0.154057
E180A	KCl	0.317535
E180A	KCl	0.283521
E180A	KCl	0.200104
E180A	KCl	0.164311
E180A	KCl	0.0225754
E180A	KCl	0.121224
E180A	KCl	0.0896542
E180A	KCl	0.0809293
E180A	KCl	0.226302
E180A	KCl	0.0375902
E180A	KCl	0.119336
E180A	KCl	0.108172
E180A	KCl	0.760152
E180A	KCl	0.412567
E180A	KCl	0.202097
E180A	KCl	0.523842
E180A	KCl	0.240907
E180A	KCl	0.20677
E180A	KCl	0.0756262
E180A	KCl	0.208761
E180A	KCl	0.0451142
E180A	KCl	0.0547637
E180A	KCl	0.0218964
E180A	KCl	0.0414953
E180A	KCl	0.315867
E180A	KCl	0.282125
E180A	KCl	0.703476
E180A	KCl	0.47573
E180A	KCl	0.598764
E180A	KCl	0.663759
E180A	KCl	0.517737
E180A	KCl	0.946737
E180A	KCl	1.77694
E180A	KCl	0.239315
E180A	KCl	1.83803
E180A	KCl	1.205
E180A	KCl	1.30333
E180A	KCl	1.26092
E180A	KCl	1.67052
E180A	KCl	-0.00692671
E180A	KCl	0.0197923
E180A	KCl	0.042124
E180A	KCl	0.00753118
E180A	KCl	-0.00558972
E180A	KCl	-0.00926322
E180A	KCl	0.12605
E180A	KCl	0.0467892
E180A	KCl	0.289083
E180A	KCl	1.56963
E180A	KCl	3.23423
E180A	KCl	0.162759
E180A	KCl	2.64851
E180A	KCl	0.04742
E180A	KCl	0.126423
E180A	KCl	0.22396
E180A	KCl	0.0824281
E180A	KCl	0.220229
E180A	KCl	0.343613
E180A	KCl	0.214207
E180A	KCl	0.209201
E180A	KCl	0.230981
E180A	KCl	0.0326522
E180A	KCl	0.580952
E180A	KCl	3.82255
E180A	KCl	0.216158
E180A	KCl	1.65914
E180A	KCl	3.72256
E180A	KCl	2.28733
E180A	KCl	4.49644
E180A	KCl	0.61247
E180A	KCl	0.525319
E180A	KCl	0.236606
E180A	KCl	0.207568
E180A	KCl	0.0201225
E180A	KCl	0.754249
E180A	KCl	0.0200776
E180A	KCl	1.00972
E180A	KCl	0.628952
E180A	KCl	0.166409
E180A	KCl	0.61247
E180A	KCl	0.534711
E180A	KCl	0.593727
E180A	KCl	1.8445
E180A	KCl	0.0618759
E180A	KCl	0.0273854
E180A	KCl	0.0328901
E180A	KCl	0.0500314
E180A	KCl	0.112188
E180A	KCl	0.125228
E180A	KCl	0.113145
E180A	KCl	0.0791769
E180A	KCl	0.0510324
E180A	KCl	0.395053
E180A	KCl	0.240722
E180A	KCl	3.60996
E180A	KCl	1.27164
E180A	KCl	3.31749
E180A	KCl	0.0128572
E180A	KCl	0.00533761
E180A	KCl	0.363093
E180A	KCl	2.85437
E180A	KCl	0.395053
E180A	KCl	0.568152
E180A	KCl	0.046338
E180A	KCl	0.0114383
E180A	KCl	0.010686
E180A	KCl	0.0433406
E180A	KCl	0.67706
E180A	KCl	0.371791
E180A	KCl	0.58903
E180A	KCl	0.530659
E180A	KCl	0.32079
E180A	KCl	0.250417
E180A	KCl	0.777392
E180A	KCl	0.949533
E180A	KCl	0.46016
E180A	KCl	0.242134
E180A	KCl	0.568152
E180A	KCl	0.568152
E180A	KCl	0.142385
E180A	KCl	0.298524
E180A	KCl	0.277802
E180A	KCl	0.331519
E180A	KCl	0.252582
E180A	KCl	0.585199
E180A	KCl	0.287048
E180A	KCl	0.32266
E180A	KCl	0.390251
EtOH	Baseline	0.0586639
EtOH	Baseline	0.111409
EtOH	Baseline	0.0951299
EtOH	Baseline	0.07131
EtOH	Baseline	0.0753683
EtOH	Baseline	0.0227298
EtOH	Baseline	0.0267716
EtOH	Baseline	0.0757213
EtOH	Baseline	0.119899
EtOH	Baseline	0.115784
EtOH	Baseline	0.0460526
EtOH	Baseline	0.105184
EtOH	Baseline	0.0667258
EtOH	Baseline	0.113966
EtOH	Baseline	0.0397942
EtOH	Baseline	0.139676
EtOH	Baseline	0.310154
EtOH	Baseline	0.049864
EtOH	Baseline	0.0779885
EtOH	Baseline	0.0530511
EtOH	Baseline	0.0835971
EtOH	Baseline	0.112441
EtOH	Baseline	0.113302
EtOH	Baseline	0.0750584
EtOH	Baseline	0.101417
EtOH	Baseline	0.208287
EtOH	Baseline	0.112408
EtOH	Baseline	0.0837049
EtOH	Baseline	0.131872
EtOH	Baseline	0.122458
EtOH	Baseline	0.0547949
EtOH	Baseline	0.208287
EtOH	Baseline	0.073623
EtOH	Baseline	0.0735886
EtOH	Baseline	0.055379
EtOH	Baseline	0.0962002
EtOH	Baseline	0.0467487
EtOH	Baseline	0.0409398
EtOH	Baseline	0.0786329
EtOH	Baseline	0.0562927
EtOH	Baseline	0.0345768
EtOH	Baseline	0.0442147
EtOH	Baseline	0.10299
EtOH	Baseline	0.0448787
EtOH	Baseline	0.0368027
EtOH	Baseline	0.0536661
EtOH	Baseline	0.110758
EtOH	Baseline	0.121765
EtOH	Baseline	0.0838354
EtOH	Baseline	0.0787887
EtOH	Baseline	0.101594
EtOH	Baseline	0.0754309
EtOH	Baseline	0.0989705
EtOH	Baseline	0.0559279
EtOH	Baseline	0.106061
EtOH	Baseline	0.398013
EtOH	Baseline	0.0789861
EtOH	Baseline	0.0647854
EtOH	Baseline	0.104895
EtOH	Baseline	0.131853
EtOH	KCl	0.120351
EtOH	KCl	0.22064
EtOH	KCl	0.129579
EtOH	KCl	0.188125
EtOH	KCl	0.226292
EtOH	KCl	0.0971265
EtOH	KCl	0.112837
EtOH	KCl	0.508551
EtOH	KCl	1.49977
EtOH	KCl	1.13883
EtOH	KCl	0.0857635
EtOH	KCl	0.519092
EtOH	KCl	0.648725
EtOH	KCl	1.33981
EtOH	KCl	0.213382
EtOH	KCl	0.150133
EtOH	KCl	0.825203
EtOH	KCl	0.169756
EtOH	KCl	0.662487
EtOH	KCl	0.0743717
EtOH	KCl	0.0324974
EtOH	KCl	0.0913458
EtOH	KCl	0.130785
EtOH	KCl	0.0543322
EtOH	KCl	0.226245
EtOH	KCl	0.0962489
EtOH	KCl	0.631428
EtOH	KCl	0.237075
EtOH	KCl	0.202412
EtOH	KCl	0.138233
EtOH	KCl	0.0343602
EtOH	KCl	0.0962489
EtOH	KCl	0.10174
EtOH	KCl	0.073524
EtOH	KCl	0.126766
EtOH	KCl	-0.00510665
EtOH	KCl	0.0350032
EtOH	KCl	0.0885761
EtOH	KCl	0.580765
EtOH	KCl	0.429196
EtOH	KCl	0.170182
EtOH	KCl	0.731731
EtOH	KCl	0.442512
EtOH	KCl	0.0656372
EtOH	KCl	0.0118548
EtOH	KCl	0.0735297
EtOH	KCl	0.188379
EtOH	KCl	0.105534
EtOH	KCl	0.397032
EtOH	KCl	0.0238857
EtOH	KCl	0.0214795
EtOH	KCl	0.551522
EtOH	KCl	0.379561
EtOH	KCl	0.63377
EtOH	KCl	0.820607
EtOH	KCl	2.02233
EtOH	KCl	3.22285
EtOH	KCl	0.229702
EtOH	KCl	0.432282
EtOH	KCl	0.360038
Non-fliers	Baseline	0.201293
Non-fliers	Baseline	0.133606
Non-fliers	Baseline	0.173256
Non-fliers	Baseline	0.297854
Non-fliers	Baseline	0.173056
Non-fliers	Baseline	0.0737504
Non-fliers	Baseline	0.146496
Non-fliers	Baseline	0.0456926
Non-fliers	Baseline	0.0800854
Non-fliers	Baseline	0.253346
Non-fliers	Baseline	0.0918855
Non-fliers	Baseline	0.138986
Non-fliers	Baseline	0.12633
Non-fliers	Baseline	0.190619
Non-fliers	Baseline	0.166662
Non-fliers	Baseline	0.137
Non-fliers	Baseline	0.0785571
Non-fliers	Baseline	0.0435579
Non-fliers	Baseline	0.124615
Non-fliers	Baseline	0.101506
Non-fliers	Baseline	0.0661989
Non-fliers	Baseline	0.0641523
Non-fliers	Baseline	0.0327092
Non-fliers	Baseline	0.0893923
Non-fliers	Baseline	0.0428169
Non-fliers	Baseline	0.0645004
Non-fliers	Baseline	0.0392007
Non-fliers	Baseline	0.122223
Non-fliers	Baseline	0.031839
Non-fliers	Baseline	0.0567518
Non-fliers	Baseline	0.0907928
Non-fliers	Baseline	0.116503
Non-fliers	Baseline	0.0665817
Non-fliers	Baseline	0.0796395
Non-fliers	Baseline	0.0854204
Non-fliers	Baseline	0.0612544
Non-fliers	Baseline	0.134395
Non-fliers	Baseline	0.0838895
Non-fliers	Baseline	0.292664
Non-fliers	Baseline	0.548388
Non-fliers	Baseline	0.235014
Non-fliers	Baseline	0.173085
Non-fliers	Baseline	0.0426972
Non-fliers	Baseline	0.0640389
Non-fliers	Baseline	0.0389979
Non-fliers	Baseline	0.0391181
Non-fliers	Baseline	0.0612085
Non-fliers	Baseline	0.12305
Non-fliers	Baseline	0.172687
Non-fliers	Baseline	0.0792094
Non-fliers	Baseline	0.107686
Non-fliers	KCl	0.383848
Non-fliers	KCl	1.21618
Non-fliers	KCl	0.204315
Non-fliers	KCl	0.427855
Non-fliers	KCl	0.663908
Non-fliers	KCl	0.0454979
Non-fliers	KCl	0.300866
Non-fliers	KCl	0.120138
Non-fliers	KCl	0.121473
Non-fliers	KCl	0.69077
Non-fliers	KCl	0.323761
Non-fliers	KCl	0.184823
Non-fliers	KCl	0.481801
Non-fliers	KCl	1.3578
Non-fliers	KCl	0.292998
Non-fliers	KCl	1.19467
Non-fliers	KCl	0.217896
Non-fliers	KCl	0.0127385
Non-fliers	KCl	0.563881
Non-fliers	KCl	0.0583438
Non-fliers	KCl	0.0461615
Non-fliers	KCl	0.061088
Non-fliers	KCl	0.308433
Non-fliers	KCl	0.706641
Non-fliers	KCl	0.376029
Non-fliers	KCl	0.815958
Non-fliers	KCl	0.0499632
Non-fliers	KCl	0.358259
Non-fliers	KCl	0.109865
Non-fliers	KCl	0.480995
Non-fliers	KCl	0.498722
Non-fliers	KCl	1.04047
Non-fliers	KCl	0.273607
Non-fliers	KCl	1.89765
Non-fliers	KCl	0.0612726
Non-fliers	KCl	0.10192
Non-fliers	KCl	0.122589
Non-fliers	KCl	0.083707
Non-fliers	KCl	0.71627
Non-fliers	KCl	0.893234
Non-fliers	KCl	2.81555
Non-fliers	KCl	1.56435
Non-fliers	KCl	0.0254447
Non-fliers	KCl	0.0212924
Non-fliers	KCl	0.00478078
Non-fliers	KCl	0.24898
Non-fliers	KCl	0.198688
Non-fliers	KCl	1.67974
Non-fliers	KCl	1.7119
Non-fliers	KCl	0.0518627
Non-fliers	KCl	0.569744
Fliers	Baseline	0.00728513
Fliers	Baseline	0.0526817
Fliers	Baseline	0.0275102
Fliers	Baseline	0.0342511
Fliers	Baseline	0.0741052
Fliers	Baseline	0.0937664
Fliers	Baseline	0.083345
Fliers	Baseline	1.08172
Fliers	Baseline	0.687673
Fliers	Baseline	0.0651132
Fliers	Baseline	0.0678381
Fliers	Baseline	0.0694875
Fliers	Baseline	0.142622
Fliers	Baseline	0.0624979
Fliers	Baseline	0.115341
Fliers	Baseline	0.079618
Fliers	Baseline	0.0413416
Fliers	Baseline	0.149306
Fliers	Baseline	0.0976341
Fliers	KCl	2.27794
Fliers	KCl	0.443856
Fliers	KCl	1.73463
Fliers	KCl	0.190075
Fliers	KCl	1.36238
Fliers	KCl	0.556639
Fliers	KCl	1.87397
Fliers	KCl	10.7085
Fliers	KCl	4.31845
Fliers	KCl	1.18813
Fliers	KCl	0.963392
Fliers	KCl	1.62372
Fliers	KCl	1.49572
Fliers	KCl	1.47149
Fliers	KCl	2.71816
Fliers	KCl	1.14789
Fliers	KCl	1.38572
Fliers	KCl	6.27441
Fliers	KCl	1.53457
