# Supplementary material for: Orai-mediated calcium entry determines activity of central dopaminergic neurons by regulation of gene expression
Source: eLife. 2024 Jan 30;12:RP88808. doi: 10.7554/eLife.88808 (PMC10945566; doi:10.7554/eLife.88808)
Supplement: Figure 7—source data 1. [file elife-88808-fig7-data1.xlsx]

## Sheet: Panel A
CS	THD'GAL4/+	THD'>Kir2.1; Gal80ts	THD'>GtACR2	THD'>Chrimson	THD'>TrpA1; Gal80ts
900	900	0	9	91	0
104	87	0	29	92	0
214	105	0	38	157	0
238	214	0	48	243	0
733	238	1	10	249	0
676	733	2	104	395	0
737	676	3	0	539	0
900	737	0	151	117	0
172	900	5	8	184	0
235	172	10	98	229	0
492	235	16	150	236	0
501	492	22	0	248	0
735	501	23	8	294	0
900	735	8	150	302	0
277	900	44	0	303	0
303	277	13	8	337	0
408	303	21	11	452	0
415	408	31	2	164	0
395	415	44	18	220	0
572	395	0	19	254	0
540	572	1	4	196	0
575	540	0	13	304	0
584	575	0	3	691	0
596	584	5	2	147	0
65	596	12	42	102	0
95	65	19	56	133	0
113	95	10	3	134	0
150	113	28	2	201	0
174	150	21	13	213	0
204	174	23	32	262	0
526	204	17	78	283	0
655	526	5	76	316	0
900	655	6	0	327	0
900	900	10	6	345	0
289	900	11	125	571	0
303	289	12	13	408	0
404	303	15	22	377	0
510	404	21	41		0
900	510	24	99
203	900	16	22
293	203	23	62
327	293	26
438	327
442	438
495	442
900	495
810	900
650
900
609
759

## Sheet: Panel B
CS	NachBac/+	THD'>NachBac	THD'>E180A	THD'>NachBac;E180A
900	223	18	0	65
104	307	44	0	73
214	484	103	0	5
238	611	104	0	73
733	900	106	0	75
676	223	134	0	125
737	307	138	0	136
900	484	192	0	197
172	611	156	0	186
235	900	194	0	165
492	241	213	0	421
501	250	153	0	415
735	284	202	0	900
900	331	203	0	45
277	360	251	0	122
303	391	253	0	178
408	421	331	0	219
415	449	333	0	851
395	471	381	0	900
572	477	394	0	900
540	371	441	0	295
575	345	131	0	6
584	397	66	0	0
596	431	112	0	126
65	416	117	0	146
95	367	148	0	320
113	494	155		900
150	567	169		156
174	595	177		189
204	676	259		297
526	889	336		310
655		342		376
900		351		398
900		352		496
289		386		545
303		251		604
404		400		756
510		426		827
900		417		900
203		900
293
327
438
442
495
900
810
650
900
609
759

## Sheet: Panel C
Time	WT-1	WT-2	WT-3	WT-4	WT-5	WT-6	WT-7	WT-8	WT-9	WT-10	WT-11	WT-12	WT-13	WT-14	WT-15	WT-16	WT-17	WT-18	WT-19	WT-20	WT-21	WT-22	WT-23		E180A-1	E180A-2	E180A-3	E180A-4	E180A-5	E180A-6	E180A-7	E180A-8	E180A-9	E180A-10	E180A-11	E180A-12	E180A-13	E180A-14	E180A-15	E180A-16	E180A-17	E180A-18	E180A-19	E180A-20	E180A-21	E180A-22	E180A-23	E180A-24	E180A-25
1	0.0781488	-0.0282788	0.0429872	-0.035244	0.0429872	-0.035244	-0.00534291	0.0781488	-0.0424609	-0.0291578	-0.0698117	0.0781488	-0.0250502	-0.0621321	-0.0727935	0.0696437	-0.0621941	-0.0488821	-0.0898393	-0.351914	0.138213	-0.351914	-0.351914		0.0101913	0.0335138	0.0562719	0.0451073	-0.103324	0.00328321	-0.0432703	-0.0300254	-0.0486075	0.00820242	0.0294974	-0.0133823	-0.0410062	-0.039372	0.0721089	0.0496954	0.00820242	0.0496954	0.0250146	-0.0463729	0.0114007	-0.137203	-0.0174691	-0.0306691	-0.0868863
2	-0.041056	0.0251998	-0.0483028	-0.086984	-0.0483028	-0.086984	0.0206505	-0.041056	-0.00992545	0.10843	0.00639183	-0.041056	0.0405573	-0.0813269	0.0422015	0.0693915	0.00271181	0.0552381	-0.0981917	-0.0765266	-0.140208	-0.0765266	-0.0765266		-0.0197836	0.0745839	0.125257	-0.0158594	0.112445	-0.0198808	-0.0352238	0.160094	0.0429034	-0.0484189	0.0336601	-0.0775312	-0.0408428	0.059796	0.0422918	0.0874729	-0.0484189	0.0874729	0.00470749	-0.0564421	0.0103333	0.0441814	0.0080922	-0.016213	-0.0728118
3	-0.000408826	0.0225727	-0.00380884	0.00749504	-0.00380884	0.00749504	0.0537576	-0.000408826	0.0208474	-0.115014	0.0137921	-0.000408826	0.0405573	0.0325606	-0.0242959	-0.168792	-0.0604039	0.0235477	-0.0987644	-0.448881	0.26021	-0.448881	-0.448881		0.0496182	0.21123	0.122903	-0.0152441	-0.0543103	0.0237181	0.00372783	0.136659	0.0862565	-0.0171641	-0.0222345	-0.0466053	0.00394617	-0.027611	0.0309595	-0.0381208	-0.0171641	-0.0381208	0.0236313	-0.0312927	-0.00402891	0.00366193	-0.0292967	-0.0331227	-0.0510933
4	-0.0661397	0.0501327	-0.0248785	-0.0446877	-0.0248785	-0.0446877	0.0630054	-0.0661397	-0.101132	-0.0970561	-0.046432	-0.0661397	0.01162	0.042109	-0.0617732	0.0161077	-0.0089781	-0.181655	-0.0786398	-0.264083	0.0973673	-0.264083	-0.264083		-0.00638561	0.14977	0.115075	-0.0400969	0.0820031	0.117149	0.0284156	0.0855847	0.0788837	-0.0428646	-0.0149572	-0.0296583	-0.00552363	0.0256396	-0.0276631	-0.0533081	-0.0428646	-0.0533081	0.0800308	-0.0267917	-0.0355465	0.0296063	-0.036951	-0.00211609	-0.0814237
5	-0.0928926	-0.0218871	-0.0487478	-0.100852	-0.0487478	-0.100852	-0.1909	-0.0928926	0.0038177	-0.0234996	-0.14857	-0.0928926	-0.0938434	-0.159134	0.0181431	-0.0411692	-0.121672	-0.0791805	-0.056845	-0.161772	0.326022	-0.161772	-0.161772		0.0175261	0.152246	0.17352	0.0321761	-0.00150988	0.037809	-0.028278	0.191746	0.0862233	-0.0160593	-0.0318354	-0.026384	0.0140735	-0.0649977	-0.0583093	0.0687829	-0.0160593	0.0687829	0.0508037	-0.0649524	0.117068	-0.0405553	0.0120261	0.00355224	-0.0579825
6	0.00657282	-0.0416543	0.00631882	0.0323315	0.00631882	0.0323315	-0.0996811	0.00657282	-0.0258769	-0.0699808	0.0294066	0.00657282	0.0867205	0.125017	-0.0302636	0.168723	0.0220247	0.0348712	-0.078783	0.0108733	0.322703	0.0108733	0.0108733		0.0229313	0.187411	0.166453	-0.0567321	-0.0864651	0.0587181	0.037623	0.215467	0.195426	-0.0172442	0.00457079	0.0363346	-0.0421773	-0.157144	-0.0118844	0.013205	-0.0172442	0.013205	0.081288	-0.0264083	-0.00682215	0.0377037	-0.00426504	0.0201902	-0.0505287
7	-0.0482041	0.0425802	0.0569635	0.0265285	0.0569635	0.0265285	0.0045629	-0.0482041	0.0343682	-0.0493656	0.037577	-0.0482041	0.0206271	0.0346906	0.017228	0.0711697	0.00990833	0.0940789	-0.0720378	-0.0552369	0.117111	-0.0552369	-0.0552369		-0.0329573	0.224295	0.15717	-0.0182852	0.137869	0.0719644	0.0176238	0.299999	0.170893	-0.0386532	0.054869	0.0493829	-0.0318204	-0.027814	-0.00638845	0.00411392	-0.0386532	0.00411392	-0.0663634	-0.0222077	0.0412263	-0.00486008	-0.0316716	-0.0100918	-0.0220284
8	-0.0315695	-0.0941043	-0.120566	0.0243153	-0.120566	0.0243153	0.0821021	-0.0315695	-0.0161381	-0.079215	-0.0984437	-0.0315695	-0.0791112	-0.00639214	0.0383821	-0.0680634	0.0258184	-0.114036	-0.0462333	0.441925	0.37829	0.441925	0.441925		0.0395736	0.245346	0.155216	0.0516894	-0.0330942	0.0693514	0.0874628	0.190792	0.154419	-0.0455819	-0.00453569	0.0337338	-0.0366253	-0.09726	-0.014722	0.0273731	-0.0455819	0.0273731	0.00886271	-0.00267192	0.0180535	0.0281827	0.0499915	0.0339931	0.00962135
9	-0.0415233	-0.0691272	0.00608413	-0.106066	0.00608413	-0.106066	0.0369017	-0.0415233	-0.0515661	0.0426657	-0.0637492	-0.0415233	-0.0266041	-0.185935	0.0433069	-0.0315277	-0.089424	-0.0725396	-0.0225449	-0.0439456	0.133047	-0.0439456	-0.0439456		0.0485488	0.21429	0.166013	0.0135449	-0.00487565	0.109759	0.0529976	0.241363	0.101766	0.0125176	-0.0476456	0.0116513	0.0597534	-0.0666382	0.0766771	0.0217286	0.0125176	0.0217286	-0.040636	-0.0346829	-0.032095	0.0158242	0.0518996	-2.95971e-05	-0.0253648
10	0.0325911	0.0170563	-0.012368	-0.0784256	-0.012368	-0.0784256	-0.100229	0.0325911	0.0349499	0.014892	-0.00226766	0.0325911	-0.0200126	-0.0122355	-0.122621	-0.000381939	-0.0207452	0.0646629	-0.108755	0.12982	0.0838789	0.12982	0.12982		-0.0343878	0.0654726	-0.0709152	-0.00470421	0.0327183	0.0977935	0.00655173	-0.0446048	0.150733	0.0131214	-0.0422866	0.0215329	0.0297761	-0.0404747	0.0110485	-0.0362766	0.0131214	-0.0362766	0.128056	-0.0525873	-0.0410295	0.106465	-0.0557368	-0.0427669	-0.00577244
11	-0.0392858	0.035882	-0.0575161	0.132811	-0.0575161	0.132811	-0.0569456	-0.0392858	0.0384588	0.065473	-0.0292572	-0.0392858	0.0514025	-0.0635195	0.016438	-0.0340627	0.0314979	0.057706	-0.0288928	-0.241759	0.102915	-0.241759	-0.241759		-0.0409279	-0.0172612	-0.180547	0.0018434	0.0685998	-0.0294614	-0.0731394	-0.211156	-0.00363863	-0.0332728	-0.0391028	-0.0523923	0.034511	-0.0793226	0.044631	0.0135938	-0.0332728	0.0135938	-0.00327189	0.00655893	0.0147151	-0.0571635	-0.0274674	0.0201536	-0.0218121
12	0.0398047	-0.082108	-0.0221571	-0.158101	-0.0221571	-0.158101	-0.180066	0.0398047	-0.0367447	-0.0853905	-0.0436745	0.0398047	-0.0783365	-0.0676	-0.100518	-0.0195358	0.0576384	-0.0706409	-0.0832373	-0.387253	0.205983	-0.387253	-0.387253		-0.0225876	-0.124235	-0.176782	-0.0548514	0.0771649	0.0021721	-0.0239533	-0.298695	-0.024274	-0.00781937	0.0359145	-0.0214003	0.0249945	0.0699434	0.000995919	-0.0330892	-0.00781937	-0.0330892	-0.06655	-0.0492801	-0.0304715	-0.0171261	-0.0219735	-0.0524398	0.0253388
13	-0.117709	-0.100738	-0.0203501	-0.124214	-0.0203501	-0.124214	0.0196119	-0.117709	0.00816522	0.113564	0.0719284	-0.117709	-0.0211173	0.0135453	0.0446653	-0.0623535	-0.0154357	0.00172343	-0.0129519	-0.0960062	-0.0338209	-0.0960062	-0.0960062		-0.0223273	-0.231621	-0.226067	-0.000860932	0.00317779	-0.105331	-0.0609571	-0.321534	-0.0701514	-0.00124725	0.0041654	0.0472571	-0.142303	-0.0201797	-0.0317937	-0.0516497	-0.00124725	-0.0516497	-0.0549001	0.0266684	0.0484916	0.0842189	0.0507047	-0.0176623	0.109171
14	-0.015806	-0.0058417	0.0571738	-0.0544257	0.0571738	-0.0544257	0.108803	-0.015806	-0.0340582	-0.030658	-0.0411797	-0.015806	0.0493169	-0.00426211	-0.0278311	-0.081895	-0.0786874	-0.0477435	-0.0253613	-0.14505	0.160622	-0.14505	-0.14505		-0.0328919	-0.210811	-0.1077	-0.0448222	0.0476538	-0.105155	-0.0376877	-0.216173	-0.0919287	0.00112927	-0.0040512	0.00690266	-0.00676474	-0.0114393	-0.0354374	-0.041781	0.00112927	-0.041781	0.0536045	0.0421407	-0.0365911	-0.00229871	-0.0128071	-0.0216462	0.0489396
15	0.0807864	0.0104893	-0.034615	0.0976473	-0.034615	0.0976473	-0.134702	0.0807864	0.0194615	0.0135082	0.0250868	0.0807864	-0.0546384	-0.0268845	0.010942	0.0234665	0.064096	-0.0192128	0.0302404	0.157919	0.30432	0.157919	0.157919		-0.0200001	-0.0976055	-0.0209652	-0.0436152	0.041704	-0.0198548	-0.024612	-0.0584561	-0.0640745	0.000946462	-0.0276232	0.0172423	-0.115068	-0.0570793	-0.00325639	-0.000611121	0.000946462	-0.000611121	-0.0383686	0.00914651	0.0764216	-0.0101888	0.04901	-0.0555529	-0.0183406
16	-0.0338088	0.0526065	-0.0330184	-0.0362266	-0.0330184	-0.0362266	-0.0574898	-0.0338088	-0.0349131	-0.0955559	-0.0201524	-0.0338088	0.0732992	0.018646	-0.0296953	0.0624757	0.00142763	-0.133327	-0.0710828	0.211703	-0.0538372	0.211703	0.211703		0.0445308	-0.013393	0.0565363	-0.0132479	0.1272	-0.00654397	-0.0331328	-0.0162256	0.0057053	-0.00635689	-0.0121393	0.0299207	-0.0585374	0.0501119	-0.02246	0.0418004	-0.00635689	0.0418004	0.0178169	0.0313703	0.00178384	-0.01685	0.0249609	0.0205048	0.0619664
17	-0.0734205	-0.0170057	-0.0660227	0.0473812	-0.0660227	0.0473812	0.0829237	-0.0734205	0.0291485	-0.11438	-0.0495947	-0.0734205	0.0613906	-0.0935685	-0.0505027	0.151028	0.0586885	0.05587	-0.0663421	0.17283	0.0146403	0.17283	0.17283		0.0462726	0.0915259	0.137552	-0.0506141	-0.0818372	-0.0212655	0.0346843	0.208469	0.0212493	0.0117379	-0.0545867	-0.0207513	-0.0387807	0.00408631	0.00122786	0.038909	0.0117379	0.038909	0.0302694	-0.0110731	0.00352164	0.061891	-0.0560928	-0.00909543	-0.0337881
18	0.0629517	-0.0351314	-0.118081	0.137582	-0.118081	0.137582	0.0714316	0.0629517	0.0467944	0.00230822	0.00535707	0.0629517	-0.0866836	0.00752245	-0.0607643	-0.00818376	0.0219475	0.00880843	-0.0807875	0.0819826	-0.0814655	0.0819826	0.0819826		-0.00918241	0.127069	0.127681	0.00762451	-0.116728	0.0587247	-0.0211116	0.255133	-0.0226357	0.0444551	-0.0500582	-0.0886717	0.0537735	-0.0686102	0.0316668	-0.00150079	0.0444551	-0.00150079	0.00550228	0.041284	0.0287487	-0.0350192	0.0522717	-0.0326746	-0.00867939
19	0.0444142	0.0273009	0.0157937	-0.0155222	0.0157937	-0.0155222	-0.0654251	0.0444142	0.0433028	-0.126097	-0.0511568	0.0444142	-0.0477215	0.199487	-0.0799605	-0.154966	0.000980377	-0.103535	0.008636	-0.00584821	-0.2473	-0.00584821	-0.00584821		-0.00881414	0.117098	0.173031	0.0151696	0.0740692	0.111767	0.012963	0.24598	0.0285889	-0.0216621	-0.0134444	-0.0276844	-0.0203819	0.0404481	0.0903371	-0.00392811	-0.0216621	-0.00392811	-0.0284252	0.0240808	0.043372	-0.0590117	-0.0128699	0.0505071	-0.00736015
20	0.0571738	0.00525733	0.0257662	-0.0434571	0.0257662	-0.0434571	0.0523349	0.0571738	-0.0298305	0.0236154	-0.00210524	0.0571738	-0.0223458	-0.0552687	0.0559386	0.0652691	-0.0442414	0.0926215	0.0590674	0.0875852	-0.069011	0.0875852	0.0875852		0.0112607	0.230622	0.161209	0.0173525	-0.00469558	0.100634	0.0522463	0.186965	0.0165655	0.0123743	0.0140135	0.0312848	0.198384	0.0658168	-0.0328662	-0.0487495	0.0123743	-0.0487495	0.0552151	-0.0376433	-0.0451285	-0.0339865	0.0148129	-0.0411111	-0.0208702
21	0.0450161	0.06075	0.0554464	0.09863	0.0554464	0.09863	0.0974214	0.0450161	-0.0740733	-0.0282913	0.0294066	0.0450161	-0.0453059	0.000936481	0.00601723	0.0420543	0.00206972	0.0280396	-0.118778	0.190672	-0.302887	0.190672	0.190672		0.0424928	0.183939	0.174589	-0.00570174	0.095977	0.0499565	0.142835	0.153291	0.0620118	0.0647831	0.0056782	0.0158537	0.010463	0.00316627	-0.0245919	-0.0298003	0.0647831	-0.0298003	-0.00639717	0.032455	0.0105824	0.0222332	-0.0573825	-0.0357002	-0.0677526
22	0.0525979	-0.0445007	0.000300194	0.00306865	0.000300194	0.00306865	0.0743873	0.0525979	-0.0350847	0.0588901	0.109663	0.0525979	0.0430921	0.0501803	-0.0910121	-0.0350779	0.095274	0.168721	0.00249503	-0.164271	-0.0593833	-0.164271	-0.164271		0.0264503	0.200012	0.170985	0.0145662	-0.0406369	0.0562806	0.071269	0.37024	0.0617903	0.0160689	-0.0328933	-0.0300698	-0.0481066	-0.0664319	0.0251954	0.0554309	0.0160689	0.0554309	-0.055017	-0.0181346	-0.0254073	0.0201777	0.020227	0.0408549	-0.00375369
23	-0.137783	0.0298176	-0.026842	0.0875153	-0.026842	0.0875153	-0.0355476	-0.137783	-0.0504715	0.126439	0.000754489	-0.137783	-0.0765764	-0.183985	0.042929	-0.0445287	0.0376627	0.0236104	-0.0343336	-0.310886	-0.197424	-0.310886	-0.310886		0.0377095	0.160867	0.0306339	-0.0753752	0.0557679	0.0847099	0.0476267	0.131109	-0.012119	-0.0212412	-0.0604303	-0.0995942	0.0266597	-0.0283011	0.0729002	0.0260018	-0.0212412	0.0260018	0.00308902	-0.0539357	-0.00960336	-0.0867481	0.0316736	0.00671615	-0.00571875
24	-0.016707	0.0843688	0.138282	0.0260859	0.138282	0.0260859	-0.109587	-0.016707	0.0382365	-0.0111421	0.034657	-0.016707	0.0607351	0.0975715	-0.0236309	0.0364737	-0.087635	0.0315806	-0.0203815	-0.139706	-0.0406199	-0.139706	-0.139706		0.00499533	-0.00611266	-0.059936	0.0855513	-0.0511852	-0.00810368	0.0193788	-0.150478	-0.0422096	0.0119207	0.0287559	0.00776961	-0.0545767	0.0337372	-0.0325257	-0.0910682	0.0119207	-0.0910682	-0.0282176	0.0209553	-0.0385215	0.00558015	-0.0177703	-0.0434471	0.0347837
25	-0.03608	0.0425152	0.00139927	0.0149712	0.00139927	0.0149712	0.171297	-0.03608	-0.0197495	0.0105077	0.0103648	-0.03608	0.0366703	0.0364534	-0.00282351	-0.0641317	-0.00598333	0.036767	0.0412652	0.398484	0.313294	0.398484	0.398484		0.0145487	-0.0856829	-0.204465	0.0469998	0.0865705	-0.00589384	-0.00987783	-0.254556	-0.0290348	0.0099346	-0.0467459	0.076885	0.119821	-0.0612567	0.0407192	0.010916	0.0099346	0.010916	-0.0161671	0.0280264	-0.0513047	0.0262532	-0.0194011	-0.0610369	0.00924399
26	0.010947	0.013554	-0.00344333	0.0402503	-0.00344333	0.0402503	0.0346574	0.010947	0.00510202	-0.00877537	0.060004	0.010947	0.03761	0.0259746	0.0483596	-0.0461161	-0.0229043	0.0604899	0.0442719	-0.104022	-0.130526	-0.104022	-0.104022		0.00356484	-0.218298	-0.197527	0.010399	-0.0019306	-0.0610101	-0.0554253	-0.403132	-0.106608	-0.00609396	-0.0230453	0.00072631	-0.000317962	-0.0444457	0.0126211	0.0417444	-0.00609396	0.0417444	-0.0317305	0.0462689	-0.0441296	-0.0027583	-0.102125	0.0579695	0.00701047
27	-0.0388858	0.0139916	-0.00504001	-0.0673596	-0.00504001	-0.0673596	-0.083156	-0.0388858	-0.0263388	0.00946664	-0.0264796	-0.0388858	-0.149875	0.146815	-0.0192745	-0.0385051	0.0444119	-0.0156091	-0.015275	-0.118847	0.0348738	-0.118847	-0.118847		-0.0178469	-0.306266	-0.230823	0.0449335	0.0547766	-0.0963221	-0.0940135	-0.293934	-0.0739717	0.03089	-0.0406551	-0.0197326	-0.0340925	0.0435262	0.0418658	0.0133241	0.03089	0.0133241	-0.0417697	0.0180673	0.00895891	-0.00140336	-0.00185124	0.0869548	-0.0343004
28	-0.0813031	0.0113425	0.0361042	0.0405956	0.0361042	0.0405956	0.0224005	-0.0813031	0.047958	0.0217077	-0.103574	-0.0813031	0.0284424	0.113518	0.0245512	0.0813157	0.00965468	-0.0207954	0.0635854	-0.16384	-0.349663	-0.16384	-0.16384		0.00278452	-0.239882	-0.124101	-0.0112162	-0.0327938	-0.0598079	-0.0160958	-0.153044	-0.0708385	-0.00207328	-0.00911365	0.0623625	-0.0189035	-0.00411286	0.0213214	0.00735736	-0.00207328	0.00735736	-0.020723	0.0160438	-0.00960336	0.0100247	0.0246526	0.0595364	0.0420503
29	0.0551027	0.00718317	0.0335649	0.0280534	0.0335649	0.0280534	-0.160585	0.0551027	0.0483346	0.0252902	-0.00488285	0.0551027	0.0289329	-0.0299449	-0.0828022	0.0232143	-0.0123625	-0.0075107	0.0748329	-0.269168	0.10879	-0.269168	-0.269168		-0.0184827	-0.198803	-0.067371	0.0266962	-0.0806053	-0.0818931	-0.0492346	-0.0404802	0.00012595	-0.0520028	0.0158921	0.0247411	0.0265157	-0.0485453	0.0220271	-0.0612311	-0.0520028	-0.0612311	-0.0295944	0.00818063	-0.0260439	-0.00696186	-0.032281	-0.0194945	0.0707118
30	0.121768	-0.0232441	0.0668052	0.105958	0.0668052	0.105958	-0.116971	0.121768	0.0334787	0.121706	0.061506	0.121768	-0.0320038	-0.0666697	0.0598204	-0.0612768	-0.00576889	0.059098	0.0689625	-0.0648043	-0.398885	-0.0648043	-0.0648043		-0.0111839	-0.021155	-0.0246546	0.0248048	-0.01882	-0.0322498	0.0279135	-0.0238689	-0.0199123	0.0481113	0.0274112	-0.0648332	-0.107968	0.127267	-0.0393245	-0.0590997	0.0481113	-0.0590997	0.00409137	0.00814393	-0.0457868	-0.0509268	-0.0261697	0.0266197	0.0190678
31	0.0875008	0.0281321	0.113236	-0.0860988	0.113236	-0.0860988	0.04637	0.0875008	0.0369013	0.151497	0.101696	0.0875008	0.0484139	0.0767037	0.124235	-0.107454	0.0375659	0.0363258	0.0429354	0.141284	0.0406927	0.141284	0.141284		0.0186387	-0.0171924	0.099844	0.0124534	-0.154502	-0.00417811	0.0184347	0.136157	-0.0563025	-0.0194853	-0.0183091	-0.0605842	0.0115173	0.0881108	0.0466543	-0.010767	-0.0194853	-0.010767	0.00530917	-0.0594489	-0.000679658	0.0314558	-0.00988559	0.0613448	-0.00924391
32	-0.00501664	0.0139475	-0.0531185	-0.0425232	-0.0531185	-0.0425232	-0.0544274	-0.00501664	0.0268032	-0.00115783	-0.106006	-0.00501664	-0.0174366	-0.00675939	-0.0092658	-0.00926051	-0.0202979	-0.0201009	0.0555352	0.351422	-0.18138	0.351422	0.351422		-0.0180131	0.0487536	0.143946	-0.0593554	0.00368854	0.0343576	-0.00433201	0.199461	0.0208395	-0.0109339	0.0443684	0.101245	0.0402769	0.0249461	-0.0376548	-0.00602268	-0.0109339	-0.00602268	0.00716805	0.0952918	-0.0315727	0.0139298	0.0634569	0.00364759	0.0289714
33	0.106973	-0.00465996	-0.0718849	0.0850565	-0.0718849	0.0850565	-0.0376284	0.106973	0.0232262	0.0482657	0.0448166	0.106973	-0.0536575	0.0364534	0.0401497	0.134729	0.0112109	0.0413841	-0.0192045	0.301517	-0.238435	0.301517	0.301517		0.0108636	0.0920674	0.119541	-0.0479335	-0.039856	0.0442109	0.0111111	0.292766	-0.0331085	0.0271232	-0.00294379	0.0635552	0.0530265	0.00454971	0.0186401	0.0352768	0.0271232	0.0352768	-0.00103861	0.0148596	0.0616274	-0.0271754	0.0454163	0.0297979	-0.0241008
34	0.0158575	-0.118271	-0.0176031	-0.108968	-0.0176031	-0.108968	0.0873555	0.0158575	0.0210697	-0.0912815	-0.0400847	0.0158575	0.0484964	0.0292227	-0.0842885	-0.150967	0.00669912	-0.0184556	0.0835346	-0.0777333	-0.113339	-0.0777333	-0.0777333		0.00586982	0.164916	0.189439	-0.041862	0.0320872	0.103526	0.0509801	0.237916	0.141555	-0.0245634	0.0372197	0.0554294	-0.0126941	0.147589	0.028742	0.0169195	-0.0245634	0.0169195	-0.0260264	0.0111604	-0.0173693	0.0180185	-0.0543354	-0.0154948	-0.0103484
35	-0.0663733	-0.0186251	-0.0248529	-0.0987383	-0.0248529	-0.0987383	0.0809532	-0.0663733	0.0586379	-0.00935736	0.00499207	-0.0663733	0.0646634	0.0304224	-0.0167794	0.102377	-0.0432293	0.0669402	0.0256901	0.109133	-0.197643	0.109133	0.109133		-0.0412098	0.0475674	-0.0134111	0.0240038	-0.108013	0.0519586	0.0524402	-0.0744101	0.0438664	-0.00877291	0.0748025	0.020448	0.00858769	-0.0539268	-0.0465509	0.0441822	-0.00877291	0.0441822	-0.033923	0.0225316	0.021913	0.0042252	0.0475139	-0.0182264	0.0042922
36	-0.0769608	-0.0168304	-0.0471781	0.0750727	-0.0471781	0.0750727	0.0317585	-0.0769608	-0.0105245	-0.0963642	-0.0400044	-0.0769608	-0.00413445	-0.0578639	0.0405618	-0.0770712	0.0742101	0.024117	0.0676417	0.316773	0.132884	0.316773	0.316773		0.0203732	-0.0443465	-0.172533	0.0856787	0.0367454	-0.022884	0.00971559	-0.203954	-0.153382	-0.0067936	0.0290921	0.0162456	0.146258	0.0628199	0.00303077	0.00901585	-0.0067936	0.00901585	0.0524564	0.0391977	-0.0851041	0.01246	0.00171958	0.0211198	0.0582249
37	-0.0230195	0.0406972	-0.00223909	0.0722199	-0.00223909	0.0722199	-0.00337242	-0.0230195	-0.0914451	-0.0344151	0.0475942	-0.0230195	0.111115	-0.00184644	0.0844813	0.0317791	-0.0296928	0.0732651	0.13955	0.110426	-0.348302	0.110426	0.110426		-0.00268613	-0.155953	-0.226556	-0.00628255	0.00789575	-0.108307	-0.00995585	-0.23184	-0.00837694	0.0642674	0.0716186	-0.00746557	0.0672039	0.116223	-0.0831537	-0.0728686	0.0642674	-0.0728686	-0.0048273	0.0824621	0.0118773	0.0144006	0.00900985	0.0661343	0.0414321
38	0.0117489	0.00856227	0.0551847	0.166894	0.0551847	0.166894	0.165386	0.0117489	0.0420185	0.0758065	-0.0337375	0.0117489	-0.0263978	-0.0264275	0.0792098	0.0966671	-0.0127902	-0.146928	0.187579	0.140939	-0.149726	0.140939	0.140939		-0.0249358	-0.255156	-0.234976	0.0133473	0.0668572	-0.191352	-0.052685	-0.299505	-0.212379	0.0368584	0.0452286	0.0013557	-0.0843206	-0.0354753	-0.000234535	0.0811542	0.0368584	0.0811542	-0.0264205	-0.0202489	0.0573708	-0.00213758	-0.0101389	-0.0225329	0.0504199
39	0.0400383	-0.0148825	0.055917	-0.0474896	0.055917	-0.0474896	0.0492689	0.0400383	-0.0275196	0.00455856	0.139553	0.0400383	0.00405217	0.100354	0.0777577	0.0412298	0.0581445	0.0164001	0.172895	0.337545	0.0819745	0.337545	0.337545		-0.0866202	-0.32577	-0.268723	-0.000420467	-0.23483	-0.141513	-0.0789522	-0.331394	-0.169568	0.028975	0.0189573	0.0393469	-0.0120832	-0.0201526	-0.065266	-0.0487039	0.028975	-0.0487039	-0.0518169	-0.0276571	0.0564393	-0.0104186	0.023734	0.00423238	0.0779523
40	0.133959	0.0929499	0.0953068	-0.0150795	0.0953068	-0.0150795	0.0347143	0.133959	0.0567718	0.157563	0.186617	0.133959	0.0253346	-0.0264275	0.075578	0.0182058	0.0688026	-0.0557138	0.158545	-0.00127997	-0.0239761	-0.00127997	-0.00127997		-0.0075204	-0.453055	-0.214813	0.0331391	0.00504158	-0.166836	-0.0340629	-0.281725	-0.156681	0.00488815	0.0229222	-0.0844667	0.0233526	0.152815	-0.161579	-0.019422	0.00488815	-0.019422	0.035268	0.0169372	-0.0270657	0.0122988	0.0567681	-0.0327047	0.0207629
41	0.0937796	-0.0324161	-0.147996	0.0321854	-0.147996	0.0321854	0.141089	0.0937796	0.0294226	0.0329077	0.193977	0.0937796	0.0426842	0.235379	0.213404	0.035963	0.0983472	0.1283	0.236498	0.264195	-0.316104	0.264195	0.264195		-0.0501196	-0.317707	-0.148522	0.0169574	-0.0715296	-0.173439	-0.11818	-0.189517	-0.236203	0.0382565	0.00167372	-0.0241971	0.0911352	0.0967734	-0.000320074	-0.0311628	0.0382565	-0.0311628	-0.0505925	0.00228494	-0.0843098	-0.0769062	0.121879	-0.00145661	-0.0170766
42	0.112317	-0.000894088	0.0106382	-0.0467526	0.0106382	-0.0467526	-0.0930049	0.112317	0.0795177	0.0599894	0.134363	0.112317	0.170947	-0.0255869	0.109773	0.0102133	0.0703	0.157841	0.316234	0.479419	0.112704	0.479419	0.479419		-0.027176	-0.217447	-0.0381399	0.0523739	0.031727	-0.0162607	-0.0555958	-0.0632472	-0.0671734	-0.0160356	0.0538902	0.0252603	0.035612	0.12478	-0.0228022	-0.0446164	-0.0160356	-0.0446164	0.0125266	0.0693127	0.0368781	-0.0392578	0.0273437	-0.00472381	0.00404983
43	0.306203	0.297277	0.219472	0.252865	0.219472	0.252865	0.0412233	0.306203	0.187702	1.36235	1.36482	0.306203	0.352213	-0.0319852	1.66725	0.117218	0.274897	0.263034	0.500473	0.304102	-0.0155456	0.304102	0.304102		0.0628207	-0.0591053	0.058001	0.0108859	-0.0558729	-0.0039832	0.00241536	0.0995283	-0.0304515	-0.0687559	0.0373779	0.0987521	-0.02849	0.122014	-0.114593	0.0376673	-0.0687559	0.0376673	-0.127755	0.0409933	-0.0150647	0.0735376	-0.0312836	0.0544099	0.0138199
44	1.641	2.26154	1.68761	2.2684	1.68761	2.2684	1.57083	1.641	0.844067	5.01016	3.96042	1.641	6.37983	1.86546	6.19763	2.20183	3.2694	4.12387	1.05374	0.367541	0.138213	0.367541	0.367541		0.0325783	0.010881	0.0997782	-0.0100092	0.0808007	-0.0290716	0.0262694	0.121783	-0.0459505	0.0170788	0.129273	0.093788	-0.038664	0.0880364	-0.10404	-0.0534465	0.0170788	-0.0534465	-0.112661	0.0718375	-0.0481709	-0.0126577	-0.036959	0.0356935	0.0203318
45	4.21192	3.58195	3.38751	4.43639	3.38751	4.43639	3.9045	4.21192	1.24025	5.85219	4.29919	4.21192	8.66308	6.25777	7.11148	6.80836	3.6009	6.24991	1.20816	1.53218	0.213272	1.53218	1.53218		0.0600311	0.0674322	0.142693	-0.023695	0.0741592	0.0575416	0.0648761	0.195419	0.0443308	0.0162596	0.0187496	-0.00809251	-0.000201243	0.0141594	-0.145652	-0.066049	0.0162596	-0.066049	-0.115551	-0.0544282	-0.0802902	0.0226816	0.0637821	0.137871	0.0816922
46	4.42958	3.51562	3.44022	4.1384	3.44022	4.1384	4.36728	4.42958	1.31009	6.02095	4.23566	4.42958	8.74641	8.36972	6.7004	8.68961	3.55597	6.19576	1.25837	3.58384	0.237149	3.58384	3.58384		0.0665784	0.042771	0.1761	0.148805	-0.0610721	0.090033	0.0202861	0.244	0.0491473	-0.0270584	0.0827323	-0.10317	-0.0666688	0.0540051	-0.111997	-0.0121015	-0.0270584	-0.0121015	-0.0677257	-0.0439862	0.0756948	-0.0249475	0.00321574	0.0843693	-0.0620737
47	4.35861	3.53007	3.37824	4.49787	3.37824	4.49787	4.47891	4.35861	1.27236	5.6713	4.1709	4.35861	8.34603	8.46969	6.84126	8.92646	3.55002	6.20652	1.29736	3.39413	0.194344	3.39413	3.39413		0.0860174	0.176632	0.166185	0.037492	-0.069426	0.0876671	-0.00339239	0.195296	0.0989658	-0.0135959	0.0823269	-0.0207293	0.134306	0.199838	-0.0453567	-0.0739071	-0.0135959	-0.0739071	-0.00493765	0.0143584	0.0635807	0.054127	0.00194899	0.239641	-0.0269265
48	4.24889	3.49839	3.35474	4.59324	3.35474	4.59324	4.345	4.24889	1.32255	5.2277	4.10165	4.24889	7.92199	8.18313	6.78692	8.72659	3.4087	6.29723	1.22493	2.27094	0.765546	2.27094	2.27094		0.0353319	0.00541431	-0.0885321	0.0225064	0.165516	0.0979363	0.0445593	-0.069373	-0.0541099	-0.0129053	0.0593185	0.014208	0.112417	0.177723	-0.105904	-0.021739	-0.0129053	-0.021739	0.0606157	0.0302682	-0.0272919	-0.038064	0.0626261	0.227703	0.0243156
49	4.24031	3.43529	3.46899	4.45277	3.46899	4.45277	4.73752	4.24031	1.33738	5.37909	4.03267	4.24031	7.87913	8.63542	6.6148	8.33306	3.39835	5.72533	1.17674	2.6302	1.69583	2.6302	2.6302		0.0258799	-0.141822	-0.150116	0.0206139	-0.0872771	0.0157171	0.0298847	-0.232097	-0.0159713	-0.02883	0.0960114	0.00902839	0.172484	0.161758	-0.0359852	0.000926532	-0.02883	0.000926532	0.0514396	0.104468	-0.00629985	0.0258287	0.0294334	0.26615	-0.0352684
50	4.23516	3.44187	3.42669	4.33001	3.42669	4.33001	4.64564	4.23516	1.3677	4.76426	3.9005	4.23516	7.68522	7.86902	6.47887	7.59434	3.31633	5.97924	1.13409	2.69183	2.00476	2.69183	2.69183		0.020561	-0.225638	-0.212102	0.0627982	0.101927	-0.0185355	0.0254312	-0.271495	0.0324412	-0.0100357	0.0804878	0.135661	0.00610158	0.142078	-0.0418709	-0.0215708	-0.0100357	-0.0215708	0.0706957	0.131165	0.0413731	0.0134926	0.071999	0.287407	0.0358345
51	4.18106	3.46486	3.43494	4.3157	3.43494	4.3157	4.65806	4.18106	1.39435	4.42078	3.81274	4.18106	7.51669	7.5755	6.18298	7.50293	3.26506	5.95425	1.16246	1.83067	2.4538	1.83067	1.83067		-0.0049911	-0.345755	-0.227951	0.109789	-0.0844524	-0.0204399	-0.0254731	-0.271291	-0.0666202	0.0170145	0.0314552	0.206008	0.258969	0.188716	0.00191054	0.0308845	0.0170145	0.0308845	-0.000174196	0.0894415	0.0320294	0.0246685	-0.00621303	0.289934	0.0491022
52	4.22805	3.41219	3.44828	4.48528	3.44828	4.48528	4.81024	4.22805	1.50599	4.29861	3.65066	4.22805	7.23401	7.26993	6.07834	7.60354	3.19453	5.97702	1.13016	3.72442	3.45849	3.72442	3.72442		-0.0190897	-0.276379	-0.205242	0.118728	0.0349725	-0.0862545	0.00986774	-0.233924	-0.0583613	-0.00908211	0.0282714	0.122483	0.168878	0.21124	0.0870833	0.0290964	-0.00908211	0.0290964	0.0448304	0.119702	0.0658853	0.0329383	0.00764036	0.373235	0.05435
53	4.14592	3.38288	3.42043	4.26136	3.42043	4.26136	4.5895	4.14592	1.47209	3.99266	3.70671	4.14592	6.77526	7.15725	6.24705	7.1741	3.14307	5.8142	1.07873	2.72346	2.74626	2.72346	2.72346		-0.0577363	-0.377438	-0.251337	0.0480092	0.0878032	-0.0655791	-0.0174773	-0.324458	-0.126114	-0.0119992	0.011146	0.255877	0.347493	0.243733	0.117267	0.116837	-0.0119992	0.116837	0.108282	0.238961	-0.0140309	-0.00272327	0.0041653	0.388686	0.0492356
54	4.21045	3.3725	3.37497	4.25585	3.37497	4.25585	4.78283	4.21045	1.51933	4.02996	3.57656	4.21045	6.87271	7.08881	5.77449	6.9632	3.10197	5.71356	1.08644	3.05892	2.43335	3.05892	3.05892		-0.0166042	-0.353465	-0.2337	-0.0174496	-0.0425604	-0.0652154	0.0852018	-0.242357	-0.0590815	0.0314779	0.0710452	0.334029	0.407494	0.154864	0.0598866	0.0189038	0.0314779	0.0189038	0.088784	0.25959	0.0570639	0.143654	0.0106167	0.406107	0.0333586
55	4.15407	3.37657	3.37934	4.41844	3.37934	4.41844	4.78923	4.15407	1.56547	4.11299	3.58999	4.15407	6.58115	6.64125	5.49783	6.38939	3.01011	5.7233	1.02473	2.11114	3.01342	2.11114	2.11114		0.182091	-0.297499	-0.140783	0.134897	-0.0409676	0.151792	0.258033	-0.188174	0.0562654	0.0175077	0.00763595	0.43216	0.222125	0.153687	0.136117	0.0178285	0.0175077	0.0178285	0.191176	0.236163	-0.0558466	0.0270799	-0.0767458	0.49695	0.0783558
56	4.23055	3.32364	3.41942	4.32318	3.41942	4.32318	4.68537	4.23055	1.64488	3.93804	3.39188	4.23055	6.15862	6.34374	5.5504	6.60214	2.95257	5.47685	0.989384	2.59339	3.21129	2.59339	2.59339		0.4005	-0.0586925	0.075446	0.0491125	-0.00547643	0.217892	0.356636	0.0643469	0.217567	0.0332191	0.0130346	0.576087	0.221425	0.0448318	0.179728	0.0736393	0.0332191	0.0736393	0.269299	0.344268	0.0658745	0.108269	-0.0640005	0.526901	0.0676714
57	4.04281	3.42502	3.36982	4.36503	3.36982	4.36503	4.63191	4.04281	1.58445	3.65617	3.40828	4.04281	6.70377	6.69262	5.58823	6.38261	2.97496	5.57535	1.00132	1.91204	3.05562	1.91204	1.91204		0.366117	0.14647	0.192014	0.101245	-0.0342663	0.30431	0.404988	0.226251	0.467734	0.0678514	-0.00727456	0.487664	0.338634	0.0625628	0.188221	0.0128057	0.0678514	0.0128057	0.318784	0.337653	-0.00889934	0.0345805	-0.0519285	0.537988	-0.00859809
58	4.08096	3.31272	3.39513	4.20229	3.39513	4.20229	4.96083	4.08096	1.48457	3.95017	3.42765	4.08096	5.94621	6.11662	5.1696	6.53992	2.9219	5.55896	1.06463	1.70052	3.49999	1.70052	1.70052		0.369333	0.247753	0.193978	0.25408	0.0281812	0.299305	0.375879	0.302934	0.530195	-0.017427	0.0025735	0.622706	0.305423	0.164883	0.199224	0.0660684	-0.017427	0.0660684	0.324647	0.348906	0.0695523	0.0894439	-0.0562744	0.536495	0.043638
59	4.06182	3.23995	3.32203	4.18138	3.32203	4.18138	4.65866	4.06182	1.62328	3.42765	3.34716	4.06182	6.07808	6.07053	5.28154	6.23684	2.94592	5.71071	1.00159	2.98005	3.49091	2.98005	2.98005		0.432455	0.327349	0.17641	0.143836	-0.00899282	0.286066	0.395459	0.291094	0.616106	0.0605638	0.0060045	0.597479	0.417761	0.0830912	0.242603	-0.035387	0.0605638	-0.035387	0.319973	0.339849	0.0514557	0.0772354	-0.0286793	0.614917	0.0406237
60	3.98597	3.29786	3.41389	4.14607	3.41389	4.14607	4.53254	3.98597	1.53067	3.47857	3.27396	3.98597	6.21305	6.67806	5.33181	6.35381	2.94827	5.57136	1.0024	2.05951	3.31223	2.05951	2.05951		0.419455	0.327117	0.191783	0.195783	0.125307	0.319207	0.415462	0.24794	0.475949	0.0479285	0.000279572	0.703523	0.411855	0.0865752	0.160756	-0.0660122	0.0479285	-0.0660122	0.285499	0.371877	0.0952342	0.158159	-0.116334	0.597217	0.0302093
61	3.95193	3.27354	3.41366	4.08395	3.41366	4.08395	4.59721	3.95193	1.63973	3.35507	3.41013	3.95193	5.7661	5.98975	5.26061	6.38102	2.85972	5.16886	0.943121	2.22449	3.62378	2.22449	2.22449		0.436198	0.372614	0.205638	0.314409	-0.0148526	0.25622	0.418912	0.310075	0.545661	-0.0575977	-0.0056431	0.79899	0.372175	0.196608	0.307879	-0.0129264	-0.0575977	-0.0129264	0.389343	0.372224	0.0266487	-0.0181363	-0.0951275	0.570884	0.0195249
62	3.95581	3.29293	3.44488	3.99454	3.44488	3.99454	4.82053	3.95581	1.55712	3.53464	3.35258	3.95581	5.68273	5.73425	4.95723	5.85111	2.83906	5.36148	0.930378	1.86963	3.65005	1.86963	1.86963		0.393888	0.368222	0.187875	0.218908	-0.0208033	0.22913	0.379283	0.284712	0.537912	-0.00107234	-0.0161833	0.611825	0.366246	-0.0150552	0.25396	-0.0281418	-0.00107234	-0.0281418	0.384179	0.418212	-0.00912679	0.107005	-0.0942957	0.633357	0.0424538
63	3.94078	3.28866	3.47312	3.87385	3.47312	3.87385	4.53188	3.94078	1.52364	3.51345	3.23434	3.94078	5.34116	6.39716	5.10071	6.15152	2.86662	5.29702	0.942882	1.58743	3.57874	1.58743	1.58743		0.37726	0.407401	0.184649	0.227277	0.194065	0.270291	0.373806	0.275735	0.647723	0.0204326	-0.0174489	0.756338	0.424792	0.186846	0.289662	-0.0230087	0.0204326	-0.0230087	0.467169	0.468091	0.0729472	0.109889	-0.0505032	0.617173	0.0228353
64	4.06606	3.30685	3.4844	3.82142	3.4844	3.82142	4.52985	4.06606	1.5576	3.06841	3.21597	4.06606	5.73331	5.90174	5.11507	5.99498	2.84739	5.1576	0.924507	2.59219	4.07614	2.59219	2.59219		0.417554	0.376225	0.150869	0.180043	-0.0943393	0.235941	0.358501	0.258344	0.643927	0.0636874	-0.0494056	0.819948	0.440308	0.0458297	0.262002	0.0179388	0.0636874	0.0179388	0.500585	0.38991	-0.0449239	0.0444799	-0.0829758	0.685152	0.0984866
65	3.86626	3.20327	3.43755	3.71602	3.43755	3.71602	4.49915	3.86626	1.58325	3.14093	3.32691	3.86626	5.63354	6.14287	5.05177	5.93078	2.81755	5.19916	0.958601	1.26688	4.14347	1.26688	1.26688		0.362728	0.287672	0.105633	0.254498	-0.0327332	0.199479	0.314962	0.124768	0.63435	0.0410145	-0.00805568	0.569718	0.388979	-0.0831651	0.350295	0.000101664	0.0410145	0.000101664	0.493229	0.384206	0.122619	0.0983568	-0.0944144	0.738662	0.0134426
66	3.96265	3.28897	3.45671	3.77327	3.45671	3.77327	4.62419	3.96265	1.5075	3.50819	3.26153	3.96265	5.75595	5.88858	5.1141	5.95457	2.85707	5.31802	0.93531	2.83706	4.02382	2.83706	2.83706		0.365279	0.255438	0.154168	0.233324	-0.0281053	0.215201	0.361591	0.066245	0.561748	0.104462	0.0415109	0.699708	0.429643	0.112891	0.317664	-0.0256024	0.104462	-0.0256024	0.591487	0.489131	0.0706089	0.151969	-0.0762949	0.685724	0.0469224
67	4.00714	3.21432	3.42714	3.85285	3.42714	3.85285	4.57713	4.00714	1.47748	3.47015	3.35367	4.00714	5.39624	5.68909	5.01918	6.01604	2.82233	5.23104	0.920053	1.73172	3.65271	1.73172	1.73172		0.352402	0.302052	0.0792644	0.280756	-0.0454752	0.153592	0.30148	0.138199	0.595736	0.00559569	0.0115613	0.810086	0.387267	0.0527502	0.218013	-0.0652153	0.00559569	-0.0652153	0.542174	0.511154	0.0681899	0.0919142	0.0119234	0.791843	0.0224856
68	3.79589	3.21292	3.37055	3.72035	3.37055	3.72035	4.56482	3.79589	1.58121	3.38296	3.1921	3.79589	5.49774	5.91714	4.84198	5.9618	2.82461	5.24711	0.910779	2.38972	3.81572	2.38972	2.38972		0.362489	0.335739	0.0454152	0.181111	-0.0154837	0.170647	0.307629	0.0852357	0.616947	0.0235313	0.0198076	0.922091	0.562863	-0.0452643	0.335612	-0.0844885	0.0235313	-0.0844885	0.536663	0.492165	0.171995	0.0878367	-0.13079	0.813204	0.0294561
69	3.85501	3.23871	3.39455	3.93026	3.39455	3.93026	4.46162	3.85501	1.48467	3.07026	3.37424	3.85501	5.43611	5.78183	4.93892	5.82758	2.79614	5.23016	0.873902	2.75647	3.79081	2.75647	2.75647		0.38276	0.257225	0.0728214	0.105041	0.00525194	0.186993	0.273421	0.0564468	0.553112	0.0303021	0.00117934	0.871333	0.435316	0.0155428	0.320978	-0.0334885	0.0303021	-0.0334885	0.526369	0.46533	0.0540673	0.0902257	-0.088699	0.802366	0.133365
70	3.94939	3.15791	3.41575	3.69065	3.41575	3.69065	4.48706	3.94939	1.5183	3.25196	3.18908	3.94939	5.32233	5.77237	4.8722	5.44426	2.84636	5.29968	0.926353	1.71801	3.95148	1.71801	1.71801		0.296484	0.290225	0.147625	0.225257	-0.0701774	0.191705	0.254827	0.080157	0.556744	0.0580925	-0.0317464	0.791687	0.473001	0.288243	0.380575	-0.0323397	0.0580925	-0.0323397	0.532273	0.556805	0.0651367	-0.0315975	-0.0936782	0.691993	0.0973821
71	3.95227	3.21879	3.35903	3.94251	3.35903	3.94251	4.47168	3.95227	1.46141	3.21951	3.22222	3.95227	5.19022	5.63846	4.83819	6.21293	2.81858	5.13584	0.873313	2.30413	3.95344	2.30413	2.30413		0.333743	0.269208	0.083837	0.151509	-0.0360393	0.172967	0.271385	0.00983489	0.756018	0.0215848	0.0239011	0.835247	0.465527	0.0596438	0.387837	-0.0559036	0.0215848	-0.0559036	0.532004	0.57452	-0.00760561	0.100114	-0.115471	0.842883	0.122304
72	3.89843	3.13225	3.37366	3.64658	3.37366	3.64658	4.52279	3.89843	1.43194	3.10848	3.16329	3.89843	5.23323	5.21288	4.67507	5.44705	2.76385	5.09416	0.849641	2.82172	3.75051	2.82172	2.82172		0.340297	0.3009	0.0257708	0.151462	0.0654444	0.154313	0.23299	0.0773971	0.551263	0.00300476	-0.00956848	0.785944	0.468503	-0.0597955	0.373861	-0.0761873	0.00300476	-0.0761873	0.567667	0.576233	0.0878089	0.0767533	-0.121092	0.853583	0.138425
73	3.8829	3.13974	3.34139	3.70181	3.34139	3.70181	4.65007	3.8829	1.48511	3.02252	3.18614	3.8829	5.19235	5.91065	4.73684	5.95679	2.7958	5.30651	0.855098	3.1914	3.24865	3.1914	3.1914		0.323641	0.280657	0.162849	0.188365	0.00465031	0.202118	0.171175	0.0518394	0.537237	0.0415392	-0.0228871	0.780091	0.506215	-0.0793733	0.392346	0.017846	0.0415392	0.017846	0.544373	0.593227	0.0751279	0.0705629	-0.103843	0.840131	0.122035
74	4.03957	3.1573	3.33815	4.02563	3.33815	4.02563	4.60542	4.03957	1.46736	2.99821	3.16978	4.03957	5.14807	5.8321	4.8368	5.66748	2.82121	4.92722	0.868524	1.17914	3.40502	1.17914	1.17914		0.327269	0.220015	0.0547974	0.123603	-0.107592	0.155516	0.237527	-0.057409	0.519867	0.046975	-0.0026175	0.799401	0.378949	0.242657	0.370571	-0.000982399	0.046975	-0.000982399	0.641801	0.598839	-0.0488292	0.0328921	-0.120229	0.841515	0.1416
75	4.05848	3.1421	3.41151	3.72266	3.41151	3.72266	4.61538	4.05848	1.50081	2.92742	3.18063	4.05848	4.95526	5.63642	4.79348	5.88035	2.84814	5.23073	0.926385	2.18191	3.65886	2.18191	2.18191		0.244165	0.277632	0.0887131	0.129907	-0.0476991	0.116915	0.1849	-0.0399367	0.660754	0.0401884	-0.0354246	0.711845	0.545728	0.0706605	0.425271	0.0268635	0.0401884	0.0268635	0.591998	0.620854	0.028011	0.0863781	-0.0999162	0.846699	0.144344
76	4.01165	3.18352	3.46634	3.8285	3.46634	3.8285	4.38993	4.01165	1.57617	3.02015	3.10773	4.01165	5.44806	5.84582	4.51281	5.72609	2.81726	5.19315	0.872868	1.61208	3.32551	1.61208	1.61208		0.315887	0.231507	0.0437258	0.195934	0.0177229	0.108238	0.158601	-0.147205	0.579295	0.0252714	0.00922786	0.709396	0.620448	0.12063	0.336403	-0.0628896	0.0252714	-0.0628896	0.640708	0.490215	-0.0177207	0.0897199	-0.0715691	0.926316	0.104138
77	4.1208	3.16984	3.40654	3.76835	3.40654	3.76835	4.49603	4.1208	1.49655	3.11224	3.18415	4.1208	5.16411	5.40383	4.85875	5.614	2.86993	5.12117	0.802009	2.2294	4.09251	2.2294	2.2294		0.27	0.170718	0.060821	0.152124	-0.0514856	0.0674664	0.151655	-0.0108495	0.582992	0.0371123	0.00727011	0.766178	0.487769	0.0549793	0.383305	-0.0411873	0.0371123	-0.0411873	0.58292	0.640117	0.100479	0.0221534	-0.0682835	0.809835	0.18676
78	4.01867	3.07816	3.2846	3.7415	3.2846	3.7415	4.39092	4.01867	1.47871	2.95074	3.06377	4.01867	4.78603	5.23365	4.48054	5.47408	2.80073	5.18815	0.838027	1.69129	4.01898	1.69129	1.69129		0.200923	0.26858	0.103464	0.130359	-0.126945	0.110682	0.161687	0.0551844	0.588163	0.0313109	-0.0177752	0.643055	0.511043	0.127165	0.418714	-0.00930289	0.0313109	-0.00930289	0.541075	0.679699	0.130532	0.0438479	-0.0818038	0.879682	0.0877485
79	3.99726	3.10982	3.39219	3.74086	3.39219	3.74086	4.3073	3.99726	1.45665	3.1493	3.11462	3.99726	5.05491	5.03556	4.70201	5.7807	2.79738	5.50659	0.71817	1.38738	4.09741	1.38738	1.38738		0.210231	0.189517	0.0293743	0.128339	-0.0537095	0.0999384	0.141435	-0.0509458	0.577933	-0.0217896	-0.00225165	0.722745	0.67452	0.118093	0.431423	0.0343398	-0.0217896	0.0343398	0.576483	0.613017	0.0177129	0.049901	-0.0821838	0.865863	0.168648
80	3.99495	3.16583	3.3561	3.80701	3.3561	3.80701	4.09023	3.99495	1.48149	3.04358	3.18669	3.99495	5.06433	5.57113	4.58237	5.8572	2.82959	5.03078	0.867889	1.98573	3.33785	1.98573	1.98573		0.256147	0.153277	0.0797307	0.110961	-0.0354982	0.0676485	0.157547	0.00268359	0.535399	0.0331706	-0.11326	0.819578	0.547393	0.0119032	0.383098	0.119776	0.0331706	0.119776	0.559564	0.599314	0.0680082	0.0443888	-0.0837917	0.899689	0.225486
81	4.06546	3.02836	3.32718	3.78758	3.32718	3.78758	4.23239	4.06546	1.48191	2.85883	3.13936	4.06546	5.19272	5.77395	4.3981	5.67452	2.7825	5.1514	0.806003	1.88954	3.8192	1.88954	1.88954		0.19864	0.158143	0.0799626	0.105668	-0.0266934	0.111657	0.0560277	0.0831331	0.566762	0.0322893	-0.0136125	0.620473	0.521704	0.0264344	0.37982	-0.0312276	0.0322893	-0.0312276	0.467328	0.61361	0.0412142	0.165476	-0.118353	0.871664	0.176667
82	4.20848	3.16218	3.36183	3.93105	3.36183	3.93105	4.35206	4.20848	1.42677	3.04774	3.12083	4.20848	5.09899	5.34781	4.70431	5.92875	2.8202	5.26881	0.844009	1.7855	3.69372	1.7855	1.7855		0.209335	0.244538	0.0330573	0.0741046	-0.162646	0.0937959	0.0489949	0.00879856	0.619272	-0.0153845	-0.0231244	0.607405	0.435363	-0.0131069	0.474961	-0.061175	-0.0153845	-0.061175	0.535572	0.603815	0.0524883	0.117215	-0.0674048	0.908059	0.218032
83	3.97468	3.1509	3.34205	3.77652	3.34205	3.77652	4.52307	3.97468	1.43743	2.88112	3.09911	3.97468	5.17115	5.99708	4.92003	5.45111	2.77328	5.13901	0.875986	2.09735	3.78896	2.09735	2.09735		0.235552	0.220143	0.0705334	0.0813723	-0.00920318	0.129199	0.00929649	0.0409026	0.646704	0.0583622	-0.0450254	0.708399	0.442533	0.00749586	0.351891	-0.0442276	0.0583622	-0.0442276	0.5898	0.667134	0.000273488	0.0739047	-0.102774	1.00215	0.170208
84	4.0531	3.11472	3.38403	3.71381	3.38403	3.71381	4.46944	4.0531	1.44147	2.90721	3.23402	4.0531	5.02082	5.68288	4.6663	5.7691	2.84601	5.15501	0.866409	1.63122	4.0112	1.63122	1.63122		0.179208	0.203081	0.0113568	0.172393	-0.195011	0.101362	0.026518	-0.0445125	0.641579	0.0764976	-0.0458857	0.603222	0.577417	-0.00375431	0.521264	-0.0502976	0.0764976	-0.0502976	0.580265	0.638559	-0.00921705	0.10271	-0.114443	0.942031	0.22048
85	3.95584	3.16023	3.45454	3.71002	3.45454	3.71002	4.349	3.95584	1.43645	3.36489	3.1655	3.95584	4.90684	5.44658	4.56519	5.65232	2.77626	5.09156	0.753059	2.59891	4.11655	2.59891	2.59891		0.229171	0.160369	0.0284221	0.149745	-0.0272344	0.0801664	0.105292	-0.0276345	0.596377	0.00387142	-0.00846107	0.634128	0.484276	0.0175926	0.448592	0.0330159	0.00387142	0.0330159	0.571608	0.600616	0.111663	0.121695	-0.080174	0.902449	0.225217
86	4.03483	3.05643	3.38921	3.72301	3.38921	3.72301	4.14686	4.03483	1.42254	3.41379	3.1522	4.03483	4.77404	5.59728	4.42193	5.93554	2.79559	5.00092	0.844789	1.04985	3.82584	1.04985	1.04985		0.192801	0.192543	-0.00526494	0.155816	-0.165862	0.0860097	0.0529741	0.0184946	0.655694	0.0133911	-0.013039	0.573878	0.569002	0.0295328	0.532317	0.0457567	0.0133911	0.0457567	0.582761	0.622439	0.0262275	0.10201	-0.115036	1.02123	0.262733
87	3.9878	3.08453	3.35181	3.52771	3.35181	3.52771	4.11562	3.9878	1.33207	2.91119	3.18022	3.9878	4.73123	5.45029	4.53371	5.71639	2.78707	4.9727	0.798	1.82722	3.69041	1.82722	1.82722		0.183276	0.198611	0.0320224	0.130649	-0.0290368	0.0705081	0.0316441	0.0589707	0.667208	0.0525371	-0.0361661	0.606234	0.587564	0.0845254	0.41016	-0.0775306	0.0525371	-0.0775306	0.494259	0.652081	-0.0164379	0.025484	-0.0701916	0.926507	0.192518
88	4.01422	3.10612	3.37851	3.74957	3.37851	3.74957	4.52908	4.01422	1.41479	2.90086	3.15986	4.01422	5.0762	5.60377	4.55269	5.34417	2.84412	5.15026	0.77471	2.20957	3.54633	2.20957	2.20957		0.183284	0.226152	0.00882144	0.121966	-0.0724316	0.0989568	0.0123595	0.0591552	0.710406	0.0419917	-0.0455594	0.637248	0.696385	0.0809129	0.446679	-0.0749736	0.0419917	-0.0749736	0.58695	0.570438	0.0180535	0.0672673	-0.111205	1.07392	0.305308
89	3.9348	3.08782	3.35731	3.56307	3.35731	3.56307	4.24175	3.9348	1.43813	3.18111	3.26567	3.9348	5.18383	5.46012	4.43305	5.97474	2.80641	5.03495	0.836229	1.95789	3.2344	1.95789	1.95789		0.215268	0.189844	0.0737038	0.0481603	-0.0870365	0.107289	0.0549041	-0.0172827	0.653946	0.0289829	-0.0405365	0.677907	0.750644	0.191842	0.492934	-0.0783449	0.0289829	-0.0783449	0.562045	0.603077	0.0368781	0.0977137	-0.138761	0.999685	0.304286
90	4.14388	3.1532	3.31205	3.82506	3.31205	3.82506	4.19912	4.14388	1.35834	3.00173	3.12251	4.14388	4.97634	5.68659	4.43236	5.99174	2.793	5.11206	0.798081	1.16086	3.75704	1.16086	1.16086		0.181514	0.273471	0.0404694	0.082277	-0.0408775	0.0763319	0.0422013	-0.0124601	0.706565	0.0662851	-0.0184673	0.61653	0.611752	-0.0515422	0.436712	-0.0798651	0.0662851	-0.0798651	0.535903	0.702862	0.0548387	0.00379924	-0.109281	0.982556	0.263756
91	3.95942	3.1495	3.40293	3.76442	3.40293	3.76442	4.27699	3.95942	1.35969	3.25663	3.22996	3.95942	5.04366	5.70634	4.40324	5.65149	2.84101	5.14913	0.816917	1.8255	3.55606	1.8255	1.8255		0.137613	0.228017	0.0490844	0.0927477	-0.134729	0.0753308	0.0443057	-0.0837986	0.773876	0.0671675	-0.0313014	0.665532	0.634205	0.124757	0.452772	-0.0603134	0.0671675	-0.0603134	0.57835	0.719619	0.11239	0.059296	-0.0516273	1.02688	0.320459
92	4.04615	3.12455	3.3956	3.76191	3.3956	3.76191	4.43031	4.04615	1.38105	3.16616	3.26662	4.04615	5.09658	5.60906	4.52033	5.51156	2.81648	4.95506	0.859695	2.4972	3.96459	2.4972	2.4972		0.157796	0.191477	0.0368822	0.10503	-0.0882683	0.0730105	0.0238234	0.014021	0.815457	0.0660865	-0.104964	0.619758	0.440144	0.103153	0.358836	-0.0248511	0.0660865	-0.0248511	0.540308	0.69427	0.0955748	0.0760415	-0.0896885	0.860327	0.291206
93	4.02207	3.1133	3.35254	3.79417	3.35254	3.79417	4.2	4.02207	1.44666	3.29526	3.2443	4.02207	4.72235	5.45372	4.4136	5.58064	2.83385	5.0228	0.787883	1.51115	3.9381	1.51115	1.51115		0.122271	0.23192	0.111028	0.0591773	-0.11808	0.0779893	0.0640836	-0.00722768	0.714293	0.0158782	-0.00249884	0.635145	0.548284	-0.00790463	0.382305	-0.0289386	0.0158782	-0.0289386	0.708461	0.716065	0.114661	0.0949113	-0.159438	0.969301	0.316855
94	4.1709	3.09001	3.4186	3.69743	3.4186	3.69743	4.27874	4.1709	1.45008	3.13117	3.21652	4.1709	4.91769	6.03668	4.40833	5.65467	2.84885	5.1602	0.954305	2.40092	3.62851	2.40092	2.40092		0.179656	0.184025	0.0981155	0.135107	-0.169618	0.0629234	0.0818396	0.0466992	0.755675	0.0145669	-0.0171226	0.739651	0.528057	0.0694056	0.384559	-0.0737407	0.0145669	-0.0737407	0.603068	0.645675	0.0383079	0.114263	-0.102331	0.931991	0.25867
95	3.99756	3.13149	3.37285	3.8827	3.37285	3.8827	4.37494	3.99756	1.42275	3.39543	3.25928	3.99756	4.84009	5.46253	4.28389	5.16218	2.91383	5.20289	0.71615	2.04917	3.76606	2.04917	2.04917		0.165666	0.195311	0.0575249	0.122802	0.0349725	0.125234	0.0200192	-0.0108187	0.73101	0.0616765	-0.0813525	0.56874	0.523602	0.0112876	0.233269	0.0363521	0.0616765	0.0363521	0.610701	0.658086	0.0049971	0.0525311	-0.0932902	0.96578	0.285769
96	4.04979	3.14885	3.32035	3.83008	3.32035	3.83008	4.31327	4.04979	1.35076	2.92326	3.28353	4.04979	5.13149	5.08304	4.41003	5.39219	2.85651	5.15994	0.829436	1.46564	3.80941	1.46564	1.46564		0.154126	0.26467	0.0376396	0.122685	0.101236	0.151967	-0.0271634	-0.0464007	0.853607	0.0671438	-0.0118921	0.653351	0.479895	-0.10761	0.424198	0.0144362	0.0671438	0.0144362	0.634576	0.673877	-0.0190831	0.0478679	-0.150073	0.92026	0.314889
97	4.12822	3.11166	3.3554	3.98574	3.3554	3.98574	4.32427	4.12822	1.33816	3.50692	3.29213	4.12822	5.00327	5.67843	4.56295	5.8834	2.88397	5.42682	0.793498	1.78559	3.92194	1.78559	1.78559		0.175848	0.231456	0.0918144	0.255973	-0.108463	0.0994637	-0.102709	0.0808244	0.959078	0.0775064	-0.0266048	0.5288	0.605986	0.0593359	0.40776	-0.0765673	0.0775064	-0.0765673	0.673474	0.678278	0.063127	0.1669	-0.170354	0.962857	0.4146
98	4.09528	3.17161	3.33553	3.83416	3.33553	3.83416	4.14457	4.09528	1.33524	3.06697	3.30584	4.09528	5.20258	5.15158	4.41919	6.03487	2.92836	5.2752	0.792003	2.20173	3.28444	2.20173	2.20173		0.19723	0.118818	0.0860617	0.207856	-0.0162351	0.110695	0.00339679	0.20098	0.946923	0.0196619	-0.0976967	0.669497	0.589556	0.00303773	0.395551	-0.0146041	0.0196619	-0.0146041	0.623969	0.640335	-0.0180625	0.0584343	-0.184374	0.980675	0.424961
99	3.98931	3.02416	3.38686	3.69522	3.38686	3.69522	4.15233	3.98931	1.24331	3.22436	3.30697	3.98931	4.78009	5.25359	4.61821	5.6964	2.88701	5.03716	0.865486	2.08416	3.69041	2.08416	2.08416		0.147166	0.228301	0.0886401	0.075603	-0.018008	0.0422287	0.0119911	0.0367265	0.963352	0.0832525	-0.0248448	0.636426	0.524003	0.066818	0.446095	-0.0112206	0.0832525	-0.0112206	0.687103	0.697486	0.0342546	0.0550812	-0.113382	1.00379	0.326355
100	4.08119	3.1652	3.32634	3.69212	3.32634	3.69212	4.28027	4.08119	1.34391	3.1101	3.30468	4.08119	5.16959	5.18542	4.4741	6.20734	2.8894	5.34965	0.92333	1.69276	3.69329	1.69276	1.69276		0.154668	0.233587	-0.0119828	0.0837052	-0.0773296	0.075916	-0.0288677	0.098738	0.913246	-0.000976423	0.0198966	0.516359	0.579643	0.120603	0.422357	-0.0402801	-0.000976423	-0.0402801	0.639243	0.648144	0.060436	0.137981	-0.104998	1.05609	0.434111
101	4.0337	3.03018	3.37246	3.70019	3.37246	3.70019	4.45784	4.0337	1.2651	2.99872	3.26721	4.0337	4.93598	5.54535	4.65635	5.70694	2.88913	5.20049	0.83693	1.58166	3.14966	1.58166	1.58166		0.177488	0.256787	0.0869839	0.0774718	-0.0777806	0.103064	0.015146	0.0429852	0.905385	0.0269562	-0.0400421	0.748753	0.53136	-0.0229736	0.483686	0.0117584	0.0269562	0.0117584	0.636788	0.746673	0.0979132	0.108693	-0.111593	1.02061	0.416403
102	4.02214	3.16163	3.3639	3.91492	3.3639	3.91492	4.26763	4.02214	1.41427	3.41293	3.39695	4.02214	5.10645	5.72564	4.59898	5.84249	2.88924	5.58344	0.881443	1.50365	3.59637	1.50365	1.50365		0.121195	0.193222	0.0721173	0.188436	-0.0318321	0.0745313	-0.0217608	0.00991717	0.946602	0.0723573	-0.0484169	0.626086	0.532582	0.018489	0.453028	-0.0439491	0.0723573	-0.0439491	0.580189	0.709742	0.0987544	0.125428	-0.139133	1.04387	0.396595
103	4.09836	3.02368	3.33537	3.64717	3.33537	3.64717	4.26216	4.09836	1.3471	3.32263	3.35002	4.09836	4.86919	5.58597	4.51448	5.99314	2.92064	5.44864	0.813591	1.94022	3.63406	1.94022	1.94022		0.150295	0.216164	0.035183	0.1596	-0.0780213	0.0927369	0.0486076	-0.0135787	1.07492	0.0446944	-0.0530739	0.844609	0.589299	0.0728152	0.30794	-0.039084	0.0446944	-0.039084	0.629639	0.678725	0.0944737	0.0643613	-0.0935596	0.94559	0.390028
104	4.07992	3.11382	3.38429	3.70412	3.38429	3.70412	4.07616	4.07992	1.29038	3.36743	3.25026	4.07992	4.85912	5.66897	4.59775	5.76979	2.92573	5.31612	0.755174	1.91023	3.65777	1.91023	1.91023		0.191052	0.23718	0.0536466	0.191826	0.0449494	0.0954276	0.00739439	0.128872	0.964437	-0.00489442	-0.0415944	0.594793	0.517043	0.0487792	0.422991	0.0008162	-0.00489442	0.0008162	0.653423	0.683937	0.00695032	0.0722864	-0.134969	1.02082	0.418825
105	3.95868	3.10064	3.34255	4.05858	3.34255	4.05858	4.17707	3.95868	1.31701	3.01749	3.40595	3.95868	5.16362	5.92419	4.31117	5.99225	2.94785	5.50387	0.803998	2.47582	3.99787	2.47582	2.47582		0.154386	0.331716	0.0535079	0.07818	-0.0415987	0.0686624	-0.0402948	0.0477148	0.965511	0.0525935	0.0199361	0.582829	0.749282	0.0481873	0.493092	-0.051084	0.0525935	-0.051084	0.633828	0.755903	0.00470225	0.0654864	-0.146424	1.09371	0.486079
106	4.07401	3.1175	3.31389	3.78247	3.31389	3.78247	4.15693	4.07401	1.29666	3.1336	3.31575	4.07401	5.07223	5.83219	4.47009	6.18768	2.92925	5.41094	0.811683	2.2581	3.5546	2.2581	2.2581		0.126427	0.244933	0.0888583	0.222773	-0.078532	0.0605182	-0.0416078	0.069836	0.971246	-0.0201917	-0.0943844	0.822461	0.402082	0.0546985	0.442915	-0.0492679	-0.0201917	-0.0492679	0.612091	0.639871	0.0472544	0.0756394	-0.152376	1.07555	0.412285
107	4.12708	3.05872	3.31449	3.53105	3.31449	3.53105	4.27398	4.12708	1.38578	3.01327	3.293	4.12708	5.08811	6.09733	4.60384	6.39345	2.9495	5.36938	0.879215	2.28137	3.4531	2.28137	2.28137		0.163317	0.305688	0.0656079	0.127411	-0.119642	0.127178	0.000702185	0.0122973	1.05609	-0.0314763	-0.00433794	0.668262	0.598112	0.059593	0.469929	-0.00755158	-0.0314763	-0.00755158	0.633269	0.684137	-0.0361254	0.105385	-0.125185	1.08504	0.406795
108	4.06846	3.09432	3.28575	3.56228	3.28575	3.56228	3.93241	4.06846	1.25053	3.15	3.36043	4.06846	4.51854	6.25517	4.49595	6.09336	2.92546	5.16304	0.885913	2.03538	3.41351	2.03538	2.03538		0.170688	0.338653	0.0491873	0.193566	-0.0519963	0.148919	-0.0569729	0.0312373	1.11114	-0.0317313	-0.0670056	0.610807	0.524376	0.0365819	0.388775	-0.0482206	-0.0317313	-0.0482206	0.611275	0.729678	0.0469824	0.0943144	-0.126246	1.12868	0.515684
109	4.1215	3.08324	3.29132	3.82034	3.29132	3.82034	4.22391	4.1215	1.23065	2.98908	3.27871	4.1215	4.62556	5.86808	4.44423	5.9023	2.95963	5.37609	0.798255	1.79981	3.58598	1.79981	1.79981		0.190062	0.365635	0.0924292	0.136186	-0.127516	0.109948	-0.015165	0.0761147	1.21419	0.0368821	-0.0583045	0.779594	0.653121	0.0383239	0.483686	-0.0673274	0.0368821	-0.0673274	0.703026	0.751347	-0.0517018	0.123934	-0.071584	1.0317	0.452384
110	4.1874	3.16855	3.33666	3.6814	3.33666	3.6814	4.07649	4.1874	1.24199	3.15421	3.36035	4.1874	5.08602	5.97853	4.43716	5.66025	2.91498	5.25723	0.844487	1.62708	3.66528	1.62708	1.62708		0.179945	0.30739	0.182563	0.123603	-0.00562705	0.0919175	0.0248689	0.114621	0.873081	0.039886	-0.08597	0.582763	0.526863	0.0197439	0.414024	-0.000278371	0.039886	-0.000278371	0.633213	0.648983	-0.0111245	0.103559	-0.106764	1.0701	0.534871
111	4.03787	3.1048	3.3516	3.94993	3.3516	3.94993	4.25127	4.03787	1.3135	3.03481	3.40668	4.03787	5.21973	6.2472	4.44988	5.6305	2.9432	5.32156	0.780851	1.34514	3.59686	1.34514	1.34514		0.196154	0.275586	0.0657401	0.211107	0.118576	0.130239	-0.047167	-0.0385106	1.05089	0.0639413	-0.113794	0.745567	0.556719	-0.0505714	0.427829	-0.0790122	0.0639413	-0.0790122	0.626064	0.679226	0.0690083	0.0828401	-0.179576	0.957798	0.444446
112	4.05704	3.20951	3.3243	3.91172	3.3243	3.91172	3.99605	4.05704	1.25865	3.21662	3.28353	4.05704	4.94589	5.71395	4.46939	5.92304	2.97541	5.34731	0.800896	1.81757	3.47541	1.81757	1.81757		0.238688	0.305241	0.0780218	0.0729786	-0.00394417	0.154573	0.0426616	0.137953	1.1918	0.014234	-0.0441257	0.883056	0.478206	-0.0403698	0.386582	-0.0112486	0.014234	-0.0112486	0.691168	0.633702	0.0451086	0.0705741	-0.0960212	1.00155	0.503384
113	3.92301	3.13532	3.36691	3.86175	3.36691	3.86175	4.17203	3.92301	1.28807	3.32603	3.39792	3.92301	4.92628	6.01423	4.49589	6.13814	2.95351	5.5379	0.802678	1.45875	3.90699	1.45875	1.45875		0.212485	0.228215	0.0725237	0.318878	0.0713051	0.138838	0.0100472	-0.0517461	1.07745	0.00527747	-0.031341	0.758635	0.525221	0.0901369	0.350563	0.0520754	0.00527747	0.0520754	0.728885	0.621966	0.0666688	0.00298375	-0.15016	1.01745	0.45669
114	4.18951	3.22693	3.36961	3.93587	3.36961	3.93587	3.83665	4.18951	1.28831	3.35369	3.44448	4.18951	5.23806	6.24136	4.65076	5.93136	2.93754	5.08739	0.824171	1.91204	3.52691	1.91204	1.91204		0.133552	0.356205	0.0733105	0.108651	-0.0519063	0.0989373	0.0209404	0.101775	1.16451	0.024732	-0.0360772	0.946125	0.421535	-0.0428323	0.34068	-0.0516216	0.024732	-0.0516216	0.710355	0.679627	0.0210164	0.0593646	-0.121852	1.06089	0.527632
115	4.13059	3.09313	3.33723	3.62037	3.33723	3.62037	4.04481	4.13059	1.32712	3.22228	3.39591	4.13059	4.83015	6.16837	4.60371	6.10947	2.96718	5.41442	0.79474	1.93496	3.33687	1.93496	1.93496		0.223751	0.398582	0.0941942	0.262194	-0.0172869	0.127672	-0.00984104	0.0267022	1.11999	0.0246993	-0.0603117	0.668262	0.581378	0.10869	0.394758	0.042522	0.0246993	0.042522	0.760379	0.641138	0.0103333	0.0397256	-0.145213	0.913764	0.586731
116	4.14305	3.14963	3.40387	3.65902	3.40387	3.65902	4.1867	4.14305	1.2071	3.16674	3.26058	4.14305	5.0527	5.82672	4.47018	5.99117	2.99414	5.55903	0.819303	1.82179	2.95016	1.82179	1.82179		0.166866	0.317877	0.0531112	0.356349	-0.13007	0.0891685	-0.00140278	0.0797365	1.1369	-0.0426423	-0.0486245	0.639761	0.555809	0.127625	0.434215	0.0510947	-0.0426423	0.0510947	0.683369	0.699053	0.00189697	0.146445	-0.102394	1.07124	0.517109
117	3.89916	3.16953	3.35437	3.99105	3.35437	3.99105	3.99633	3.89916	1.20359	3.23209	3.35594	3.89916	5.20016	5.76968	4.51354	5.81356	2.97589	5.43726	0.766517	1.70776	3.42754	1.70776	1.70776		0.188508	0.386857	0.11687	0.328141	-0.114324	0.125592	-0.0382729	0.0795728	1.25935	-0.0217817	-0.0585517	0.765093	0.586066	0.0502641	0.378796	-0.0210805	-0.0217817	-0.0210805	0.632038	0.692457	0.0530106	0.0490855	-0.148925	0.943532	0.532638
118	4.04782	3.15228	3.31412	3.82919	3.31412	3.82919	3.83588	4.04782	1.33779	3.26835	3.26232	4.04782	5.14675	5.52467	4.37429	5.86703	2.94894	5.38039	0.822548	1.85265	3.7901	1.85265	1.85265		0.210014	0.347145	0.100627	0.349338	0.00636348	0.132878	0.00763403	0.0323659	1.13599	-0.0124754	-0.0406947	0.831997	0.484159	0.0988232	0.408418	0.00925753	-0.0124754	0.00925753	0.657932	0.601774	0.0878209	0.144297	-0.112226	1.06091	0.581511
119	3.89565	3.16021	3.33022	3.87926	3.33022	3.87926	4.32284	3.89565	1.21091	3.10121	3.34804	3.89565	4.93148	5.71905	4.62904	6.26171	3.00188	5.47926	0.777748	1.68259	3.49809	1.68259	1.68259		0.191681	0.379087	0.110877	0.345971	-0.10651	0.0942577	-0.00289972	0.0584779	1.16285	-0.00695271	-0.0947898	0.78241	0.537994	0.0772462	0.540785	0.0445237	-0.00695271	0.0445237	0.726935	0.658514	0.0054857	0.098368	-0.144318	1.05626	0.573195
120	4.04986	3.1997	3.3342	3.93842	3.3342	3.93842	4.2783	4.04986	1.18495	3.0907	3.41639	4.04986	5.28132	6.14389	4.56453	5.77157	3.06902	5.53151	0.763002	2.27827	2.76083	2.27827	2.27827		0.182958	0.297608	0.0706923	0.331972	-0.125081	0.111403	0.0380789	0.00520753	1.15412	0.00391091	-0.0358398	0.75014	0.568111	-0.0373492	0.415279	0.00740464	0.00391091	0.00740464	0.674844	0.673294	0.0490825	0.0175939	-0.166388	1.05294	0.611977
121	3.98891	3.15226	3.3275	3.98308	3.3275	3.98308	3.8934	3.98891	1.1628	3.47655	3.40777	3.98891	5.07673	5.78814	4.37776	5.91702	3.03422	5.53442	0.809901	2.01262	3.06797	2.01262	2.01262		0.201877	0.372821	0.0571016	0.460163	0.0335302	0.162522	-0.0548078	0.0806091	1.21653	0.00903635	-0.0482587	0.770383	0.449941	0.0643589	0.468759	0.00114895	0.00903635	0.00114895	0.581488	0.704284	0.0425537	0.061891	-0.155829	1.10434	0.637246
122	4.02374	3.13195	3.30451	3.76658	3.30451	3.76658	3.9949	4.02374	1.22216	3.5344	3.47937	4.02374	4.97237	5.82385	4.45395	6.13979	3.07777	5.62665	0.794278	1.68561	3.06384	1.68561	1.68561		0.278888	0.404453	0.0299728	0.314514	-0.0266328	0.145045	-0.0426026	0.091536	1.27095	-0.0932083	-0.0734622	0.79693	0.565251	0.142539	0.454989	-0.0486286	-0.0932083	-0.0486286	0.582463	0.645265	-0.0665418	0.0131367	-0.166879	1.09302	0.69998
123	3.9682	3.1346	3.33553	3.77731	3.33553	3.77731	3.8859	3.9682	1.12316	3.54619	3.4437	3.9682	4.98772	5.92029	4.53422	6.44274	3.04605	5.30176	0.74679	2.05296	3.30913	2.05296	2.05296		0.23269	0.385921	0.0282209	0.304356	-0.222899	0.166799	0.0619513	0.117104	1.174	0.03248	-0.0469041	0.80844	0.517416	-0.117785	0.484124	0.0754362	0.03248	0.0754362	0.692876	0.617283	0.0287487	0.0901683	-0.159873	1.11964	0.652398
124	3.95711	3.23768	3.3806	4.11518	3.3806	4.11518	4.07392	3.95711	1.23534	3.62846	3.37961	3.95711	5.37058	6.28457	4.63021	6.15571	3.00147	5.60729	0.73559	1.86334	3.32469	1.86334	1.86334		0.180379	0.350996	0.0639849	0.300827	-0.0351675	0.146533	-0.0153172	0.10787	1.1644	-0.0310554	-0.0648402	0.892984	0.483642	0.0792216	0.500769	-0.0153362	-0.0310554	-0.0153362	0.623644	0.696502	0.0494231	0.0237605	-0.0857227	1.18129	0.548355
125	3.90063	3.19736	3.33338	3.60192	3.33338	3.60192	3.92081	3.90063	1.22599	3.36651	3.42412	3.90063	5.35941	6.53441	4.58992	6.23291	3.05688	5.55378	0.814132	1.47236	3.92804	1.47236	1.47236		0.305929	0.335515	0.0619842	0.326492	-0.037001	0.126047	0.0174767	-0.0135271	1.23893	0.034641	-0.0431468	0.957285	0.512074	0.129753	0.49916	-0.0702556	0.034641	-0.0702556	0.601484	0.695928	-0.0280525	0.121856	-0.150192	1.14117	0.648227
126	3.93269	3.1967	3.35029	3.72916	3.35029	3.72916	3.77372	3.93269	1.10002	3.55918	3.38145	3.93269	4.95522	6.7198	4.70422	6.24077	3.11574	5.64113	0.797094	1.74379	3.13215	1.74379	1.74379		0.284662	0.396683	0.0664903	0.291993	-0.0807257	0.157778	0.0348821	0.0455706	1.23833	4.0314e-05	-0.0411495	0.808959	0.576666	0.0408337	0.497833	-0.0179018	4.0314e-05	-0.0179018	0.69457	0.65487	0.00119294	0.114115	-0.0867201	1.1487	0.571634
127	3.98737	3.17954	3.39403	4.01608	3.39403	4.01608	3.88306	3.98737	1.07197	3.45375	3.41856	3.98737	5.49909	6.3608	4.39282	6.3807	3.09084	5.48008	0.846952	2.25965	3.36744	2.25965	2.25965		0.267601	0.332077	0.0817477	0.404466	-0.0557828	0.154964	0.0159475	0.119802	1.21291	0.0337675	0.0255325	0.936633	0.634606	0.0942365	0.565217	-0.0265849	0.0337675	-0.0265849	0.678072	0.68011	0.0096521	0.130699	-0.124401	1.0791	0.610765
128	3.7839	3.15999	3.31462	3.91088	3.31462	3.91088	3.94314	3.7839	1.09884	3.75306	3.39628	3.7839	5.22251	6.72554	4.62143	6.79231	3.09012	5.55441	0.788694	1.26705	3.11752	1.26705	1.26705		0.220832	0.360915	0.0538784	0.277193	0.0253262	0.161925	0.00323517	0.104781	1.1965	-0.0197866	-0.0219873	1.01162	0.555618	0.000450125	0.430803	-0.0126199	-0.0197866	-0.0126199	0.651031	0.60848	0.118702	0.10117	-0.104682	1.09207	0.753267
129	3.92698	3.16664	3.33893	3.84621	3.33893	3.84621	4.18199	3.92698	1.20461	3.52332	3.49493	3.92698	5.38098	6.54804	4.82152	6.54474	3.09545	5.43068	0.800069	1.8205	3.40029	1.8205	1.8205		0.297503	0.32961	0.148607	0.303845	0.140212	0.165505	-0.00668108	0.024066	1.25166	-0.0164566	-0.0401212	1.08142	0.72062	0.317353	0.468309	0.029254	-0.0164566	0.029254	0.683231	0.58744	0.0358901	0.0415976	-0.115804	1.12214	0.596206
130	4.05013	3.26287	3.33925	4.02199	3.33925	4.02199	3.61153	4.05013	1.1412	3.68948	3.51587	4.05013	5.54198	6.66035	4.57103	6.53668	3.13852	5.65062	0.807324	1.26309	3.40785	1.26309	1.26309		0.240429	0.398719	0.121125	0.369177	0.00606309	0.187318	0.0122397	0.129118	1.18023	0.0212586	-0.0708519	0.992504	0.591618	-0.0279933	0.445863	-0.00361287	0.0212586	-0.00361287	0.597466	0.662387	-0.00146312	0.0345679	-0.139402	1.15266	0.670591
131	3.97775	3.11621	3.30554	3.77878	3.30554	3.77878	3.62319	3.97775	1.11337	3.64936	3.51334	3.97775	5.39718	6.16197	4.53308	6.431	3.10868	5.65644	0.836977	2.22431	3.55253	2.22431	2.22431		0.236882	0.417286	0.100251	0.234904	-0.0462863	0.195462	-0.0369509	0.0649619	1.2253	-0.0376433	-0.0419603	0.991767	0.576126	0.193892	0.430619	0.0234344	-0.0376433	0.0234344	0.629777	0.634467	0.0480716	0.0361078	-0.161623	1.07448	0.680306
132	3.98978	3.15139	3.3141	3.81768	3.3141	3.81768	3.69903	3.98978	1.108	3.81841	3.50993	3.98978	5.16779	6.744	4.57163	6.26887	3.09574	5.45902	0.850388	1.7718	3.45104	1.7718	1.7718		0.311595	0.291471	0.0862929	0.309592	-0.0159347	0.183503	0.00598495	0.0720824	1.32771	0.0238417	-0.0434335	0.831823	0.398612	-0.000625508	0.465456	-0.0329596	0.0238417	-0.0329596	0.610639	0.595286	0.00615483	0.00367314	-0.129491	1.07953	0.729394
133	3.92448	3.1437	3.29645	3.89333	3.29645	3.89333	3.97663	3.92448	1.06701	3.93521	3.5677	3.92448	5.24723	6.32992	4.70722	6.70731	3.11838	5.52601	0.824187	1.15724	3.45746	1.15724	1.15724		0.264465	0.396149	0.10958	0.334293	0.00200566	0.16546	-0.0768795	0.0913515	1.35516	0.0286726	-0.0409419	0.939383	0.537173	0.0789882	0.43592	-0.0313292	0.0286726	-0.0313292	0.659135	0.595532	0.0547592	0.0878367	-0.100233	1.08424	0.679257
134	4.00784	3.29394	3.38015	4.15989	3.38015	4.15989	3.69476	4.00784	1.07849	3.72257	3.58275	4.00784	5.5216	6.53775	4.46782	6.82238	3.11465	5.50305	0.788376	1.26929	3.49058	1.26929	1.26929		0.247569	0.404152	0.0356096	0.220985	0.075572	0.200909	-0.032663	0.177422	1.33632	-0.0110614	-0.0328142	0.87662	0.470915	0.0327868	0.319577	0.0584239	-0.0110614	0.0584239	0.604257	0.62828	-0.0353756	0.0502107	-0.100391	1.08771	0.773773
135	4.04585	3.19276	3.31946	4.21625	3.31946	4.21625	4.05679	4.04585	1.10636	3.60894	3.50675	4.04585	5.35802	6.19694	4.75966	6.86006	3.15629	5.74348	0.826573	1.49521	3.3626	1.49521	1.49521		0.321256	0.44071	0.0512004	0.379032	-0.0132598	0.197016	-0.0375406	0.0384401	1.31254	0.0220057	0.03191	1.01314	0.515774	0.112739	0.283923	0.00436436	0.0220057	0.00436436	0.597833	0.643407	0.082439	0.0696676	-0.0826197	1.08147	0.638405
136	3.81964	3.25049	3.33909	3.81006	3.33909	3.81006	3.81734	3.81964	1.09381	3.57378	3.41453	3.81964	5.33657	6.37499	4.73182	6.36871	3.12541	5.58022	0.864484	2.3193	3.09076	2.3193	2.3193		0.262752	0.38574	0.0608607	0.329372	-0.0760077	0.131253	-0.0205676	0.113543	1.3313	0.0155927	-0.00585074	0.909824	0.485777	0.102053	0.465639	-0.0186059	0.0155927	-0.0186059	0.64292	0.625583	0.102206	0.0772017	-0.116414	1.15281	0.722398
137	3.87241	3.18788	3.42308	3.85737	3.42308	3.85737	3.76748	3.87241	1.03278	3.49895	3.55829	3.87241	5.05897	5.94042	4.49926	6.40532	3.17497	5.63063	0.712045	1.06424	2.97083	1.06424	1.06424		0.242879	0.388224	0.0846602	0.362618	0.109199	0.196288	0.00707672	0.0921617	1.13192	-0.0617944	-0.0300754	1.09595	0.435503	0.171956	0.378492	0.0559493	-0.0617944	0.0559493	0.575936	0.558774	0.0289978	0.0640278	-0.0902979	1.09329	0.811667
138	3.98476	3.21524	3.29352	4.09354	3.29352	4.09354	3.73558	3.98476	1.06653	3.89393	3.49965	3.98476	5.19444	6.54322	4.52168	6.63405	3.08672	5.60065	0.728336	1.7749	3.34514	1.7749	1.7749		0.300184	0.310123	0.0742958	0.423422	0.0127046	0.157511	-0.0683588	0.114919	1.32468	-0.0208598	-0.0315882	0.887739	0.535955	0.0167707	0.337367	0.0510474	-0.0208598	0.0510474	0.599203	0.531411	0.0160774	0.0159279	-0.0666846	1.09243	0.737227
139	3.9519	3.12958	3.27476	3.82885	3.27476	3.82885	3.80502	3.9519	1.06723	3.71379	3.47404	3.9519	5.03142	6.17449	4.63036	7.07287	3.14772	5.5243	0.827861	1.97668	3.03914	1.97668	1.97668		0.317484	0.439996	0.147566	0.35022	0.0397805	0.163952	0.0129904	0.0970143	1.37917	-0.0266691	-0.00829298	0.981927	0.599423	-0.0249456	0.486025	-0.000388704	-0.0266691	-0.000388704	0.560683	0.531966	0.0785903	0.0726072	-0.202708	1.01394	0.801924
140	3.94221	3.3093	3.3264	3.8527	3.3264	3.8527	4.00979	3.94221	1.02684	3.48752	3.5063	3.94221	5.28046	6.0875	4.68843	7.02885	3.13387	5.59065	0.898274	1.05355	3.04632	1.05355	1.05355		0.207738	0.408682	0.0741337	0.419359	-0.0027123	0.159324	-0.00267401	0.0194894	1.15492	-0.0107906	-0.0657894	0.678837	0.619674	0.123245	0.497905	-0.0300507	-0.0107906	-0.0300507	0.613101	0.518508	0.0140797	0.0402875	-0.0817888	1.13567	0.737657
141	3.88326	3.1742	3.32203	3.73943	3.32203	3.73943	3.79348	3.88326	1.13175	3.70184	3.45277	3.88326	5.36813	6.59293	4.60394	6.66507	3.17065	5.76916	0.862893	2.06227	3.03202	2.06227	2.06227		0.263243	0.380385	0.074428	0.405069	0.00407981	0.196073	0.016818	0.114764	1.32482	-0.0285998	-0.0247657	1.06255	0.656821	0.0929038	0.332334	-0.0140297	-0.0285998	-0.0140297	0.60658	0.571166	0.0688482	0.104697	-0.151783	1.11114	0.833411
142	3.93069	3.22363	3.31313	3.95087	3.31313	3.95087	4.06971	3.93069	1.06374	3.9034	3.5836	3.93069	5.49561	6.22234	4.57965	6.98241	3.18541	5.65638	0.814212	2.09632	2.9934	2.09632	2.09632		0.315425	0.374196	0.103186	0.449332	-0.0896508	0.0941472	0.0197472	0.0548968	1.26157	0.0376528	0.0262642	1.02828	0.631392	0.125856	0.41267	0.0131665	0.0376528	0.0131665	0.577976	0.535848	0.0690191	0.0262182	-0.0784633	1.09879	0.72821
143	3.96195	3.19539	3.34917	3.98225	3.34917	3.98225	3.85958	3.96195	1.1353	3.79081	3.58504	3.96195	5.26176	6.9828	4.64599	6.42523	3.20027	5.58819	0.844216	1.82386	3.34743	1.82386	1.82386		0.273201	0.369211	0.115501	0.405058	0.0782167	0.117675	-0.00106171	0.110783	1.24962	0.0334967	0.0090301	0.95178	0.619674	-0.0715057	0.446058	0.00732058	0.0334967	0.00732058	0.530863	0.549407	0.0635578	0.121028	-0.0920165	1.0566	0.783866
144	3.97027	3.24499	3.30726	3.99671	3.30726	3.99671	3.74604	3.97027	1.08965	4.13856	3.54248	3.97027	5.34165	6.56436	4.82329	6.13332	3.18862	5.57667	0.810743	1.41591	3.42243	1.41591	1.41591		0.288087	0.316854	0.109041	0.455322	0.0482555	0.199849	0.0127557	0.197081	1.31961	-0.017093	0.00539146	1.06396	0.64555	0.0685093	0.475301	0.0103696	-0.017093	0.0103696	0.602846	0.549015	0.0139208	0.0677143	-0.100288	1.10886	0.839386
145	3.87097	3.24525	3.32093	4.16083	3.32093	4.16083	3.7503	3.87097	1.13139	4.46956	3.59966	3.87097	5.32143	6.28077	4.70924	6.79408	3.14898	5.70154	0.72797	1.30989	3.31762	1.30989	1.30989		0.298999	0.505779	0.121571	0.400125	0.0484052	0.128042	0.0595699	0.142611	1.30086	0.0459018	-0.0143442	1.02022	0.600267	0.1071	0.322403	0.0269003	0.0459018	0.0269003	0.590525	0.444955	0.0437235	0.139371	-0.0503137	1.10101	0.774043
146	3.74546	3.22119	3.26149	3.91767	3.26149	3.91767	3.87868	3.74546	1.13379	3.99601	3.5879	3.74546	5.45194	7.10003	4.72376	6.47858	3.13927	5.59546	0.780406	1.75637	2.72548	1.75637	1.75637		0.282198	0.370843	0.120143	0.484261	0.0704931	0.164927	-0.0096014	0.101549	1.22596	-0.0309448	0.022062	1.00206	0.666104	0.107665	0.312242	-0.0163362	-0.0309448	-0.0163362	0.565503	0.509459	-0.00120196	0.141254	-0.0646498	1.02273	0.750845
147	3.94505	3.32369	3.39672	3.98933	3.39672	3.98933	3.8152	3.94505	1.07103	3.92389	3.72212	3.94505	5.46582	6.61853	4.66614	6.703	3.21052	5.65986	0.756908	1.76465	3.50015	1.76465	1.76465		0.24762	0.338687	0.0661667	0.43286	0.0748812	0.184569	0.0111668	0.136865	1.23103	-0.0134447	0.0227145	0.972305	0.537597	0.0505448	0.287554	0.00592128	-0.0134447	0.00592128	0.575265	0.595814	0.110731	0.0568607	-0.0884297	1.0221	0.774689
148	3.82919	3.27804	3.33752	4.00969	3.33752	4.00969	3.81432	3.82919	1.0075	3.86963	3.61481	3.82919	6.01702	6.91798	4.8764	7.31169	3.19064	5.45579	0.79991	1.31386	3.27944	1.31386	1.31386		0.318365	0.407917	0.116397	0.488684	-0.0284663	0.169035	-0.0427269	0.107008	1.38838	0.0627259	-0.0321221	1.15476	0.508207	0.0808351	0.476655	-0.0197285	0.0627259	-0.0197285	0.563214	0.470542	0.0318139	0.108176	-0.103724	1.0265	0.821409
149	4.019	3.32458	3.36034	3.91993	3.36034	3.91993	3.6222	4.019	1.09525	3.89607	3.5997	4.019	5.86121	6.53478	4.59734	6.8527	3.14616	5.69775	0.781726	1.40944	3.17697	1.40944	1.40944		0.273989	0.372468	0.12412	0.374191	-0.0546107	0.208572	0.0115999	0.129498	1.32256	0.0351973	-0.0226399	0.959908	0.641519	0.159759	0.386497	0.0304029	0.0351973	0.0304029	0.542617	0.530982	0.0591423	0.094498	-0.118915	0.982608	0.786961
150	3.9708	3.25933	3.32059	4.07245	3.32059	4.07245	3.37098	3.9708	1.06032	4.25334	3.67495	3.9708	5.79147	6.75643	4.70321	6.58952	3.18593	5.88245	0.771496	1.60458	2.90681	1.60458	1.60458		0.23876	0.40918	0.101679	0.469693	0.0268282	0.181416	-0.0162891	0.111604	1.22851	0.0204326	-0.0632483	1.01001	0.675597	-0.0681739	0.418556	0.0208863	0.0204326	0.0208863	0.527544	0.508111	0.0465504	0.0854477	-0.00889614	1.0644	0.880077
151	3.9507	3.29691	3.24306	4.09276	3.24306	4.09276	3.47965	3.9507	1.17608	4.08602	3.68343	3.9507	5.59081	6.40495	4.76835	6.82891	3.24471	5.95153	0.783555	1.72974	2.69546	1.72974	1.72974		0.26101	0.37662	0.169358	0.406324	-0.10068	0.15588	0.00361748	0.154029	1.3455	-0.014168	-0.0150363	1.04302	0.425823	0.154533	0.375238	0.0137514	-0.014168	0.0137514	0.5334	0.464328	-0.052383	0.0199129	-0.0539234	0.869892	0.795599
152	3.75367	3.25683	3.36621	4.08617	3.36621	4.08617	3.67922	3.75367	1.06891	4.25611	3.60682	3.75367	5.5094	6.69513	4.88783	6.7167	3.20447	5.53613	0.770446	1.36419	2.98166	1.36419	1.36419		0.268381	0.411346	0.0694061	0.497321	0.0753314	0.158298	0.000139857	0.121967	1.51861	0.0398544	-0.0383711	1.13216	0.738174	0.201093	0.365087	-0.00401217	0.0398544	-0.00401217	0.4859	0.490434	0.0883998	0.0744218	-0.0719411	0.933667	0.877091
153	3.8841	3.25659	3.32901	4.07373	3.32901	4.07373	3.70012	3.8841	0.986927	4.0911	3.69462	3.8841	5.58602	6.42331	4.7303	6.95304	3.24886	5.8488	0.755269	1.80757	3.35542	1.80757	1.80757		0.2768	0.377428	0.0999332	0.331206	-0.0314711	0.226322	0.0435461	-0.0451483	1.27422	0.00275086	0.0179289	0.970375	0.559509	0.142156	0.414682	0.0467479	0.00275086	0.0467479	0.528304	0.552569	0.0462327	0.0199829	-0.19491	0.929289	0.74137
154	3.84849	3.29398	3.32323	4.09659	3.32323	4.09659	3.59074	3.84849	1.08453	4.23747	3.70318	3.84849	6.10173	6.28995	4.70071	6.70959	3.22631	5.64879	0.762412	1.55227	3.37984	1.55227	1.55227		0.253033	0.414828	0.151711	0.419115	-0.0665415	0.182222	0.0572437	0.101908	1.42037	0.0384958	-0.0335064	1.00284	0.549292	0.109688	0.336038	0.08586	0.0384958	0.08586	0.514199	0.461284	0.0259783	0.00914056	-0.0641511	1.07447	0.880132
155	3.7161	3.23155	3.34278	4.0479	3.34278	4.0479	3.7375	3.7161	1.10119	4.35813	3.72147	3.7161	5.4666	7.00293	4.77542	6.58248	3.19513	5.78213	0.735495	1.27757	3.32828	1.27757	1.27757		0.249159	0.352423	0.130014	0.396862	-0.0650387	0.145643	0.0680907	0.12919	1.32872	0.0543336	-0.0358794	0.970505	0.60662	0.240939	0.425197	0.0105167	0.0543336	0.0105167	0.53611	0.437165	0.0652727	0.00532794	-0.0811864	1.02539	0.884411
156	3.93831	3.30725	3.35231	3.92741	3.35231	3.92741	3.39604	3.93831	1.06305	4.4254	3.66757	3.93831	5.58671	6.92967	4.75537	6.77563	3.20999	5.583	0.840604	1.48719	2.70775	1.48719	1.48719		0.343751	0.372288	0.145691	0.466501	-0.0840317	0.184959	0.0487692	0.0908794	1.31163	0.0742486	-0.0578991	1.11866	0.561151	0.202862	0.455002	0.0537812	0.0742486	0.0537812	0.533864	0.509004	-0.0412798	0.111909	-0.0412659	1.08413	0.842858
157	3.90678	3.35087	3.32472	4.11125	3.32472	4.11125	3.85159	3.90678	1.13119	4.39261	3.70589	3.90678	5.81296	7.20872	4.50896	6.96421	3.23612	5.54985	0.725981	1.91428	3.12927	1.91428	1.91428		0.270852	0.350575	0.102644	0.415749	-0.134999	0.166695	0.0208852	0.144498	1.40093	-0.0517252	-0.0850702	0.987236	0.52454	0.17152	0.4972	0.0581455	-0.0517252	0.0581455	0.548349	0.432846	0.0355724	0.0651992	-0.157023	0.939849	0.879701
158	3.71396	3.3	3.29562	4.01741	3.29562	4.01741	3.60157	3.71396	1.05713	4.09659	3.69829	3.71396	5.41707	6.5396	4.64508	6.59288	3.20906	5.59837	0.765165	2.28111	3.04997	2.28111	2.28111		0.309253	0.437383	0.113762	0.47241	-0.0354082	0.159539	0.0246571	0.0155293	1.42171	0.000486053	-0.0205141	0.996817	0.60941	0.179313	0.494311	0.0904379	0.000486053	0.0904379	0.416502	0.463434	-0.00174713	0.0798542	-0.127766	1.01864	0.809971
159	3.72936	3.27864	3.31773	4.04987	3.31773	4.04987	3.66817	3.72936	1.03812	4.37927	3.71839	3.72936	5.63219	6.46569	4.62212	6.67439	3.25446	5.92439	0.729338	1.46599	3.51402	1.46599	1.46599		0.315381	0.424412	0.117925	0.466419	-0.0571653	0.172194	0.00233734	0.109121	1.33689	-0.0334951	-0.0175676	1.12317	0.676488	0.143668	0.474607	0.0134274	-0.0334951	0.0134274	0.409498	0.448463	0.0592434	0.0806472	-0.202763	1.11591	0.919397
160	3.67842	3.35175	3.32988	4.22329	3.32988	4.22329	3.70543	3.67842	1.06542	4.28337	3.69687	3.67842	5.68351	7.18961	4.65272	6.96123	3.23612	5.9421	0.776794	2.22888	3.05475	2.22888	2.22888		0.21065	0.48845	0.102853	0.432709	0.00443995	0.188612	-0.0139033	0.166352	1.296	-0.0751689	-0.00531681	0.884227	0.497235	0.253136	0.519315	-0.0368703	-0.0751689	-0.0368703	0.531409	0.456874	0.0300653	0.0747314	-0.127456	1.03183	0.907528
161	3.86129	3.26482	3.32943	3.94639	3.32943	3.94639	3.50833	3.86129	1.03997	4.39052	3.702	3.86129	5.75427	6.72722	4.60861	6.94658	3.20605	5.81028	0.817155	2.02366	3.08456	2.02366	2.02366		0.321755	0.375571	0.142984	0.534282	-0.107892	0.207584	0.0460284	0.121977	1.43557	0.069965	-0.0469535	0.996447	0.623144	0.256725	0.499003	0.0766043	0.069965	0.0766043	0.50248	0.447407	-0.0572089	0.0246797	-0.088707	1.0874	0.918133
162	3.80771	3.33559	3.39136	4.09595	3.39136	4.09595	3.61919	3.80771	1.05602	4.51633	3.79586	3.80771	5.59167	6.62168	4.77504	6.8277	3.20253	6.05799	0.771242	1.66768	3.47611	1.66768	1.66768		0.317369	0.405845	0.104697	0.356535	0.0415239	0.212556	-0.0331696	0.103684	1.39147	0.000191527	-0.00767995	1.21265	0.640932	0.256031	0.294451	0.0177356	0.000191527	0.0177356	0.419115	0.418412	-0.0209797	0.0807495	-0.0520951	1.05354	0.981161
163	3.72388	3.27824	3.35699	3.95707	3.35699	3.95707	3.66165	3.72388	1.04464	4.18614	3.69734	3.72388	5.68052	6.5983	4.73781	6.93136	3.25671	5.82451	0.816296	2.13476	2.71455	2.13476	2.13476		0.333758	0.377763	0.12005	0.537091	-0.0162351	0.157388	0.0216683	0.167224	1.33339	-0.0738892	-0.0727701	0.998918	0.564831	0.218952	0.481395	0.0690526	-0.0738892	0.0690526	0.494038	0.417528	0.0273178	0.081956	-0.0914619	0.988935	0.942192
164	3.85581	3.34212	3.30514	4.18807	3.30514	4.18807	3.59216	3.85581	1.04082	4.20479	3.6054	3.85581	6.05041	6.59683	4.4166	6.92107	3.26871	5.93192	0.793006	1.55701	2.42612	1.55701	1.55701		0.304686	0.392977	0.162019	0.515	-0.0249802	0.149536	0.00713635	0.0934748	1.39495	0.00759757	-0.0232925	1.19657	0.723783	0.302158	0.460436	0.110981	0.00759757	0.110981	0.360421	0.472647	0.0581651	0.0855514	-0.147208	1.08335	0.887236
165	3.78363	3.32161	3.31415	4.15325	3.31415	4.15325	3.52808	3.78363	0.969367	4.68128	3.80874	3.78363	5.98035	6.66323	4.81208	7.5833	3.26729	6.0461	0.754665	1.77042	3.04306	1.77042	1.77042		0.276951	0.390442	0.0948656	0.501708	-0.0331842	0.223332	-0.00586574	0.148859	1.35368	-0.00564935	-0.0867017	0.949201	0.656681	0.248576	0.346323	0.0926901	-0.00564935	0.0926901	0.446033	0.397628	-0.0071856	0.0671398	-0.124409	1.08111	0.943673
166	3.84282	3.34221	3.36181	4.25319	3.36181	4.25319	3.50296	3.84282	1.01578	4.59347	3.66984	3.84282	5.91163	7.08843	4.53583	7.25276	3.26671	6.25105	0.770987	1.43642	2.88082	1.43642	1.43642		0.283513	0.400533	0.119363	0.581969	-0.0161754	0.187188	0.0396171	0.070328	1.47501	-0.0245385	-0.0493167	1.16003	0.797028	0.275098	0.541614	0.117867	-0.0245385	0.117867	0.371809	0.473732	0.0142614	0.116607	-0.121266	1.05534	0.916033
167	3.88306	3.31532	3.3316	4.23878	3.3316	4.23878	3.40879	3.88306	0.965567	4.52719	3.69768	3.88306	5.75537	7.09215	4.91034	6.87268	3.31166	6.21176	0.742909	1.46573	2.86069	1.46573	1.46573		0.360712	0.392539	0.139906	0.565253	-0.157687	0.231197	0.080103	0.132207	1.38403	-0.0125713	-0.0233716	0.995105	0.660175	0.326935	0.52135	0.0569038	-0.0125713	0.0569038	0.359162	0.350346	-0.0308915	0.0626042	-0.0508364	1.09861	0.977528
168	3.82628	3.29958	3.35827	4.14873	3.35827	4.14873	3.51495	3.82628	1.04378	4.4735	3.71392	3.82628	5.65351	7.16828	4.85234	7.12311	3.27651	5.7987	0.736879	1.7175	3.00341	1.7175	1.7175		0.232806	0.421077	0.0960223	0.583071	-0.125502	0.232574	0.00962364	0.167716	1.40045	-0.00638059	-0.0921794	1.0725	0.622957	0.283504	0.425697	0.120322	-0.00638059	0.120322	0.459965	0.411342	0.0235594	0.0897199	-0.0129806	1.00685	1.01249
169	3.75464	3.34109	3.26193	4.15438	3.26193	4.15438	3.24955	3.75464	1.09711	4.48827	3.76237	3.75464	5.86154	7.07851	4.44473	6.99611	3.29454	6.15426	0.759994	1.93669	2.84329	1.93669	1.93669		0.303342	0.429733	0.128001	0.498842	0.0571806	0.187091	0.0327359	0.156646	1.32751	0.0221727	-0.0314596	1.18296	0.841346	0.306282	0.362468	0.117737	0.0221727	0.117737	0.520125	0.403059	0.120586	0.100964	-0.0689717	0.997964	1.11591
170	3.78276	3.3069	3.32823	4.23544	3.32823	4.23544	3.44179	3.78276	1.04905	4.22944	3.76168	3.78276	5.87463	7.04448	4.53027	6.94854	3.32833	6.04471	0.788105	2.21759	2.69138	2.21759	2.21759		0.29772	0.42638	0.133069	0.591325	0.0515606	0.193454	0.014713	0.172775	1.35662	0.0110867	-0.0196934	1.10427	0.639831	0.254699	0.495201	0.149639	0.0110867	0.149639	0.44035	0.386684	0.121961	0.082955	-0.0697797	0.91725	0.973437
171	3.6987	3.40276	3.33697	4.20908	3.33697	4.20908	3.63243	3.6987	1.07726	4.1583	3.71575	3.6987	5.96156	6.51345	4.44461	7.13706	3.27793	6.07324	0.744722	1.42522	3.27269	1.42522	1.42522		0.327854	0.436635	0.0877974	0.562699	-0.108553	0.179753	0.0056578	0.0601807	1.35389	-0.0091058	-0.0492771	1.18181	0.847159	0.290448	0.532365	0.107793	-0.0091058	0.107793	0.39399	0.412098	0.00469021	0.0820022	-0.0307769	1.0592	0.958824
172	3.73854	3.28575	3.24584	4.22929	3.24584	4.22929	3.66494	3.73854	0.987287	4.37476	3.72337	3.73854	5.98882	6.52384	4.57233	6.92659	3.267	5.70515	0.838027	1.58683	2.8007	1.58683	1.58683		0.277544	0.455976	0.10878	0.51435	0.0116822	0.195683	0.0323581	0.147094	1.5273	0.0240798	-0.0654532	1.01257	0.609196	0.387231	0.501353	0.0650579	0.0240798	0.0650579	0.335323	0.393856	0.0206987	0.0854589	-0.0104083	1.12588	1.01195
173	3.8358	3.27106	3.34969	4.31974	3.34969	4.31974	3.22039	3.8358	0.930806	4.67696	3.73351	3.8358	5.82618	6.76951	4.64975	7.22643	3.30942	5.81085	0.760615	1.23033	3.34944	1.23033	1.23033		0.321531	0.46586	0.0934537	0.540272	0.0690508	0.211191	0.0557423	0.0105222	1.39333	-0.0471076	-0.0264367	1.06829	0.961792	0.335188	0.479896	0.154496	-0.0471076	0.154496	0.323853	0.488584	-0.00220084	0.0482588	-0.0920794	1.10701	0.952203
174	3.75651	3.36138	3.33645	4.2404	3.33645	4.2404	3.20567	3.75651	1.00604	4.37644	3.76464	3.75651	6.05029	6.98076	4.68306	7.20531	3.27383	5.9607	0.823105	1.58519	3.35395	1.58519	1.58519		0.33693	0.39896	0.100334	0.556059	0.0704636	0.220804	0.0388067	0.103355	1.42339	-0.0413469	-0.0746091	1.26844	0.814723	0.452781	0.557125	0.111575	-0.0413469	0.111575	0.338738	0.437538	0.00866406	-0.00998281	-0.0373071	1.0964	0.964233
175	3.58066	3.3565	3.34482	4.22501	3.34482	4.22501	3.32665	3.58066	1.00228	4.45998	3.79785	3.58066	5.8827	7.4198	4.80924	7.55977	3.28573	6.01213	0.75772	1.38858	2.54121	1.38858	1.38858		0.259247	0.393021	0.0851031	0.547991	-0.0871871	0.136297	0.0330447	0.0876366	1.37653	-0.00128675	0.00694382	1.30292	0.810902	0.408399	0.607315	0.0870929	-0.00128675	0.0870929	0.309616	0.456638	0.0569616	-0.0111766	-0.0777193	1.02774	0.976748
176	3.72912	3.33452	3.34569	4.00148	3.34569	4.00148	3.15078	3.72912	1.02614	4.62049	3.77277	3.72912	6.02942	6.80039	4.56368	7.39053	3.31973	6.00068	0.774122	2.73139	2.94685	2.73139	2.73139		0.295566	0.443245	0.113944	0.642518	-0.0839408	0.196509	0.00952221	0.150079	1.52648	0.00302846	-0.0967178	1.13845	0.86462	0.358839	0.470612	0.105802	0.00302846	0.105802	0.298996	0.370374	-0.00885361	0.0429988	-0.0515565	1.07981	1.05191
177	3.87374	3.28293	3.26581	4.14976	3.26581	4.14976	3.60556	3.87374	0.955161	4.69439	3.70622	3.87374	5.86853	6.84296	4.67387	7.22111	3.32707	5.99436	0.798605	1.5102	2.7679	1.5102	1.5102		0.284684	0.449391	0.146789	0.644723	-0.0701176	0.194403	0.0046173	0.0671168	1.36433	-0.030165	-0.0739961	1.20756	0.901791	0.357969	0.442877	0.244035	-0.030165	0.244035	0.312921	0.383322	0.0301339	0.0625804	-0.0874403	1.10177	1.07414
178	3.8014	3.31832	3.2641	4.10269	3.2641	4.10269	3.44387	3.8014	0.936317	4.48943	3.78658	3.8014	5.87782	6.71145	4.53112	6.75165	3.3662	6.01225	0.73454	1.60338	2.75833	1.60338	1.60338		0.31593	0.37007	0.154921	0.566785	0.0154393	0.214935	0.0285076	0.159868	1.41836	-0.0870729	-0.0764482	1.07501	0.876479	0.260977	0.383317	0.137464	-0.0870729	0.137464	0.302626	0.434814	0.0684282	0.0546104	-0.0644992	1.04668	1.14441
179	3.70621	3.36931	3.32702	4.16938	3.32702	4.16938	3.14274	3.70621	0.945046	4.61916	3.75196	3.70621	6.1409	6.59237	4.61739	7.37132	3.32827	6.20607	0.798176	2.04658	2.97589	2.04658	2.04658		0.368155	0.441397	0.118622	0.480326	-0.0370608	0.184725	0.0169055	0.116898	1.38915	-0.0358321	-0.0798792	1.20238	0.776941	0.42403	0.516829	0.153412	-0.0358321	0.153412	0.280141	0.350573	-0.00464147	0.0653365	-0.120039	1.11332	1.04616
180	3.82799	3.36946	3.28753	4.22275	3.28753	4.22275	3.27204	3.82799	0.873163	4.91743	3.80408	3.82799	5.98915	6.59728	4.82259	7.37512	3.29143	6.11878	0.872326	2.90265	2.52881	2.90265	2.90265		0.281887	0.457505	0.107842	0.585451	-0.146839	0.19686	0.0131609	0.154163	1.43834	0.00526167	-0.00491142	1.07436	0.764331	0.478664	0.4749	0.232953	0.00526167	0.232953	0.333462	0.396799	0.0458235	0.0622133	-0.0936543	1.08071	1.08413
181	3.73534	3.39805	3.361	4.23234	3.361	4.23234	3.11587	3.73534	0.94152	4.8549	3.81235	3.73534	6.1567	7.28644	4.78316	7.20462	3.29908	6.11669	0.845902	2.21897	2.88294	2.21897	2.21897		0.361211	0.46317	0.126811	0.586972	0.0310354	0.196041	-0.00203366	0.124953	1.44603	0.0378672	-0.0767745	1.11758	0.912642	0.41442	0.487159	0.123343	0.0378672	0.123343	0.302757	0.443115	0.13001	0.00877345	-0.041226	1.08926	1.13077
182	3.81302	3.35464	3.35414	4.21665	3.35414	4.21665	3.42646	3.81302	1.03512	4.74791	3.77622	3.81302	5.91654	7.30192	4.91994	6.85206	3.31569	6.00517	0.836802	1.74551	3.16799	1.74551	1.74551		0.368249	0.314825	0.191125	0.729522	0.0274593	0.187617	0.00329034	0.193408	1.42147	-0.0163302	-0.000531212	1.20253	0.824239	0.601712	0.486318	0.186983	-0.0163302	0.186983	0.358617	0.423333	0.0592205	0.0468114	-0.0204544	1.14158	1.06782
183	3.84071	3.39958	3.26871	4.29377	3.26871	4.29377	3.31379	3.84071	0.989563	4.62696	3.77751	3.84071	6.16448	7.71878	4.66971	7.29799	3.32024	6.19911	0.829946	2.25233	2.73402	2.25233	2.25233		0.403579	0.391293	0.148167	0.655728	0.221562	0.240335	0.0518322	0.0573393	1.48432	-0.0107669	-0.119182	1.19406	0.853018	0.463493	0.441854	0.176039	-0.0107669	0.176039	0.29056	0.413747	0.103715	0.0612478	-0.120593	1.09746	1.09791
184	3.75167	3.35017	3.32634	4.2467	3.32634	4.2467	3.28687	3.75167	0.97089	4.69607	3.77928	3.75167	5.93746	6.30637	4.65745	7.12317	3.34303	5.9533	0.777176	2.10614	2.57808	2.10614	2.10614		0.323077	0.386109	0.17364	0.573843	-0.0550617	0.232211	0.0674877	0.0917105	1.42884	-0.0635819	-0.0679548	1.19078	0.945175	0.537752	0.532121	0.0824607	-0.0635819	0.0824607	0.294252	0.449139	0.0386833	-0.0103723	-0.115519	1.15258	1.09191
185	3.81716	3.35538	3.27816	4.34182	3.27816	4.34182	3.21098	3.81716	0.89507	4.67909	3.83352	3.81716	6.14094	7.18721	4.67653	7.02764	3.31318	6.0523	0.819016	1.78878	2.83584	1.78878	1.78878		0.41431	0.449219	0.121574	0.598151	-0.00280233	0.203079	0.0670223	0.196486	1.34787	-0.0461541	-0.0847835	1.21211	1.03119	0.48412	0.504253	0.218275	-0.0461541	0.218275	0.309519	0.420709	0.0727775	0.0646485	-0.111094	1.10402	1.0331
186	3.85694	3.38925	3.30067	4.15837	3.30067	4.15837	3.3365	3.85694	0.968956	4.64058	3.79347	3.85694	6.02913	6.96361	4.93396	7.09944	3.32839	6.36851	0.875381	1.13802	2.90061	1.13802	1.13802		0.296094	0.415206	0.115504	0.657701	-0.0670825	0.22146	0.0278355	0.161448	1.43729	-0.0575187	-0.0892824	1.22598	0.861573	0.467285	0.524493	0.199892	-0.0575187	0.199892	0.332467	0.465668	0.0691322	0.0741233	-0.0734373	1.20426	1.05851
187	4.01346	3.39757	3.29915	4.2589	3.29915	4.2589	3.4709	4.01346	0.950745	4.48787	3.75458	4.01346	6.04202	6.61157	4.65424	6.96561	3.3547	5.95539	0.826366	1.66501	3.01434	1.66501	1.66501		0.31278	0.401556	0.10764	0.510449	0.0165811	0.18765	0.0486633	0.105161	1.47075	-0.043421	-0.062309	1.29345	0.837269	0.556356	0.455282	0.116874	-0.043421	0.116874	0.247941	0.442879	0.0106402	0.0704256	-0.0869974	1.1364	1.16258
188	3.78473	3.37281	3.28085	4.13535	3.28085	4.13535	3.39369	3.78473	1.00367	4.22754	3.78787	3.78473	5.97646	6.53784	4.94668	6.85885	3.3123	6.14136	0.855129	1.67578	2.65167	1.67578	1.67578		0.326473	0.403086	0.11003	0.704007	-0.0522067	0.163803	0.059653	0.0834921	1.48443	-0.0227906	-0.113715	1.26087	1.13272	0.416571	0.501768	0.238652	-0.0227906	0.238652	0.28552	0.410276	0.122028	0.123383	-0.116651	1.12806	1.23215
189	3.84853	3.34339	3.31826	4.34442	3.31826	4.34442	3.37043	3.84853	0.973371	4.28613	3.74965	3.84853	6.06102	7.00673	4.59841	7.26139	3.39327	6.23606	0.754888	1.788	2.70481	1.788	1.788		0.386633	0.357898	0.163401	0.504228	-0.0449947	0.175184	0.026085	0.111451	1.47751	-0.050168	-0.0770217	1.22043	0.903083	0.586518	0.486927	0.181793	-0.050168	0.181793	0.268152	0.318099	0.0394548	0.0915457	-0.127774	1.03441	1.18214
190	3.79115	3.33049	3.32959	4.31605	3.32959	4.31605	3.35648	3.79115	0.927143	4.7004	3.83218	3.79115	5.76204	6.94274	4.74539	7.31226	3.3469	6.05476	0.767058	1.47486	2.80032	1.47486	1.47486		0.327052	0.371755	0.134894	0.578416	-0.0743551	0.234979	0.0415242	0.197625	1.61791	-0.0312066	-0.0203064	1.13817	1.00588	0.659292	0.379747	0.191513	-0.0312066	0.191513	0.291812	0.431926	0.0321882	-3.58003e-05	-0.0481363	1.06675	1.03337
191	3.78657	3.36747	3.35621	4.29381	3.35621	4.29381	3.53208	3.78657	0.921599	4.39878	3.79734	3.78657	5.86211	6.69336	4.53908	7.13782	3.36334	6.26035	0.819064	1.79016	2.56856	1.79016	1.79016		0.316314	0.442919	0.116678	0.723218	0.0432969	0.215201	0.0640741	0.0717541	1.47879	-0.0190238	-0.0440466	1.28591	0.883415	0.651682	0.435213	0.166949	-0.0190238	0.166949	0.215458	0.389674	0.047879	-0.0341925	-0.0827862	1.12441	1.30562
192	3.79873	3.42567	3.38905	4.1686	3.38905	4.1686	3.68245	3.79873	1.05672	4.4877	3.80574	3.79873	6.18175	7.25156	4.94912	7.40576	3.33416	6.30355	0.771194	1.47745	3.44979	1.47745	1.47745		0.287856	0.377136	0.135876	0.656343	-0.0378719	0.236234	0.100327	0.234099	1.44993	0.0334572	-0.0422075	1.16478	1.02278	0.673001	0.53446	0.202949	0.0334572	0.202949	0.241345	0.310454	0.145212	0.0961514	-0.0812901	1.08667	1.12041
193	3.79966	3.35718	3.33982	4.27699	3.33982	4.27699	3.25962	3.79966	0.94455	4.63002	3.8307	3.79966	5.79282	6.28188	4.52339	7.41235	3.32718	6.05268	0.717216	1.76577	2.88435	1.76577	1.76577		0.423805	0.428753	0.142531	0.698412	0.0930319	0.213862	0.0820006	0.210696	1.37129	-0.0115703	-0.0553679	1.19657	0.970605	0.629337	0.341156	0.269657	-0.0115703	0.269657	0.239374	0.368424	0.0601411	0.168726	-0.0690904	1.07921	1.08835
194	3.73313	3.36108	3.34309	4.25221	3.34309	4.25221	3.26488	3.73313	0.980218	4.25005	3.79157	3.73313	5.9632	6.74724	4.76459	7.17113	3.30721	6.03161	0.729338	2.26353	3.13862	2.26353	2.26353		0.375837	0.40165	0.105907	0.794575	-0.0150335	0.18039	0.0827006	0.125743	1.50246	0.0180008	-0.0465778	1.3449	0.941495	0.60161	0.479166	0.296935	0.0180008	0.296935	0.261134	0.464246	0.0849025	0.0766034	-0.0744816	1.09501	1.11201
195	3.73477	3.34822	3.31917	4.34565	3.31917	4.34565	3.71172	3.73477	0.972242	4.27395	3.76447	3.73477	5.68044	6.74345	4.81517	7.15622	3.37841	6.22644	0.691618	1.82205	3.16566	1.82205	1.82205		0.402372	0.405673	0.175286	0.557417	0.0863307	0.19515	0.0939851	0.179136	1.50837	0.0461805	-0.0618245	1.2213	1.11437	0.582827	0.478141	0.298205	0.0461805	0.298205	0.28953	0.2832	0.0731855	0.0733653	-0.172397	1.1145	1.13039
196	3.66045	3.42449	3.39274	4.3908	3.39274	4.3908	3.5648	3.66045	1.01544	4.31772	3.81004	3.66045	6.08356	6.27084	4.58509	7.18978	3.36783	6.205	0.752883	2.32706	2.77214	2.32706	2.32706		0.336692	0.378537	0.155278	0.650922	0.0872924	0.242727	0.0922256	0.12404	1.52573	0.0395046	-0.0525499	1.26731	1.12351	0.546131	0.466017	0.23476	0.0395046	0.23476	0.230932	0.403223	0.116909	0.0738361	-0.0389539	1.12297	1.23126
197	3.74709	3.4755	3.37552	4.34565	3.37552	4.34565	3.28222	3.74709	0.980132	4.4952	3.76885	3.74709	6.37676	6.56706	4.82474	7.3148	3.34438	6.06356	0.779085	2.71923	2.8069	2.71923	2.71923		0.34657	0.358156	0.118291	0.54892	-0.0310806	0.240952	0.0890707	0.162053	1.47511	-0.0311186	-0.0284835	1.30095	1.28249	0.555152	0.478055	0.298123	-0.0311186	0.298123	0.293969	0.365827	0.108767	0.00460352	-0.0851532	1.03978	1.13631
198	3.8494	3.41628	3.39973	4.28565	3.39973	4.28565	3.43183	3.8494	0.841226	4.49347	3.8261	3.8494	5.95727	6.1999	4.68388	6.70662	3.35824	6.0399	0.728097	1.6157	2.51559	1.6157	1.6157		0.331034	0.411862	0.117749	0.585799	0.0273398	0.237572	0.161102	0.229636	1.47245	0.0314621	0.0153186	1.17657	1.21285	0.72179	0.530805	0.261205	0.0314621	0.261205	0.246883	0.364315	0.0823138	-0.0414394	-0.0873615	0.949178	1.18212
199	3.69275	3.37861	3.4045	4.20597	3.4045	4.20597	3.37825	3.69275	0.941024	4.69947	3.76064	3.69275	6.01816	6.26157	4.89626	6.97766	3.37898	6.00834	0.748015	3.47885	2.67729	3.47885	3.47885		0.317708	0.410977	0.141264	0.552565	-0.106359	0.228428	0.118769	0.0550406	1.47437	0.0644096	-0.0501373	1.19687	1.09639	0.80274	0.567324	0.30597	0.0644096	0.30597	0.308136	0.352642	0.12456	0.0951873	-0.0955145	1.04036	1.08803
200	3.71523	3.33671	3.36144	4.31683	3.36144	4.31683	3.20654	3.71523	0.939757	4.4015	3.70928	3.71523	5.76233	6.05393	4.95417	6.70186	3.38501	6.07387	0.754967	2.43635	2.96126	2.43635	2.43635		0.411043	0.444483	0.133476	0.641774	-0.0121785	0.222344	0.117433	0.208018	1.47812	0.0506063	-0.0281967	1.24871	1.24862	0.590874	0.435761	0.323928	0.0506063	0.323928	0.244947	0.385601	0.0991166	0.0756044	-0.0589665	1.06342	1.08192
201	3.76399	3.38062	3.35409	4.29465	3.35409	4.29465	3.43621	3.76399	1.01635	4.39491	3.74296	3.76399	5.84455	6.55936	4.74245	7.01217	3.31242	6.11214	0.840159	2.51659	2.80973	2.51659	2.51659		0.431024	0.344911	0.134358	0.738437	0.235416	0.256935	0.0798589	0.224434	1.42995	-0.0117362	-0.0681525	1.29824	1.35545	0.743317	0.493263	0.372892	-0.0117362	0.372892	0.273426	0.345616	0.072153	0.0411156	-0.0963065	1.03213	1.13752
202	3.72087	3.39877	3.32375	4.25093	3.32375	4.25093	3.43943	3.72087	0.96543	4.72216	3.8831	3.72087	5.85896	6.5627	4.82408	6.63557	3.33488	6.24466	0.749479	1.98375	2.97801	1.98375	1.98375		0.357641	0.401994	0.111766	0.729231	-0.0809663	0.191224	0.0909683	0.186123	1.46783	-0.0332254	-0.043394	1.30652	1.28926	0.750592	0.423565	0.310149	-0.0332254	0.310149	0.233816	0.321151	0.0725609	0.0275858	-0.0794688	1.09462	1.09718
203	3.76559	3.35972	3.29538	3.94359	3.29538	3.94359	3.39867	3.76559	0.983692	4.57545	3.74152	3.76559	5.73569	6.75049	4.67552	6.9918	3.35608	6.03376	0.844645	2.7207	2.47871	2.7207	2.7207		0.333938	0.38868	0.133998	0.574516	-0.0410576	0.270655	0.0536652	0.199954	1.5124	-0.00707233	-0.0226399	1.32882	1.25933	0.504672	0.51477	0.382564	-0.00707233	0.382564	0.224254	0.34281	0.182838	0.0339023	-0.0962277	1.15452	1.21258
204	3.81693	3.45693	3.3316	4.4031	3.3316	4.4031	3.45952	3.81693	0.986721	4.47326	3.73779	3.81693	6.26785	6.40486	4.66769	7.06139	3.34731	6.1086	0.737085	1.95936	2.36069	1.95936	1.95936		0.362208	0.442978	0.136689	0.695127	-0.00490594	0.201143	0.0490178	0.144509	1.5002	-0.0279002	-0.0717121	1.28519	1.21613	0.569835	0.491765	0.238967	-0.0279002	0.238967	0.21895	0.34487	0.102319	-0.0210073	-0.0302303	1.03138	1.12234
205	3.60237	3.39352	3.3288	4.31846	3.3288	4.31846	3.32654	3.60237	0.988176	4.70484	3.82362	3.60237	5.81214	6.50631	4.56557	7.11759	3.3299	6.57157	0.72719	1.99495	2.69589	1.99495	1.99495		0.444718	0.39682	0.174671	0.729754	-0.0397054	0.266535	0.129663	0.0987072	1.45196	-0.0128173	-0.0689337	1.30721	1.28343	0.847379	0.397585	0.303904	-0.0128173	0.303904	0.226514	0.282125	0.133041	0.0422408	-0.118844	1.10337	1.15623
206	3.71947	3.37491	3.35053	4.43202	3.35053	4.43202	3.45393	3.71947	0.925945	4.6325	3.76932	3.71947	6.18956	6.53395	4.51451	7.07522	3.34533	6.45941	0.795901	2.62382	2.86939	2.62382	2.62382		0.36267	0.406215	0.147936	0.808853	0.0509599	0.273665	0.050736	0.154461	1.36127	0.0402674	-0.0552888	1.19462	1.33588	0.786366	0.38685	0.37454	0.0402674	0.37454	0.204493	0.283163	0.0709158	0.0629937	-0.0810128	1.06004	1.22257
207	3.66052	3.40621	3.31111	4.35883	3.31111	4.35883	3.0333	3.66052	0.85627	4.73077	3.78382	3.66052	5.80101	6.29005	4.48632	6.83107	3.32761	6.36687	0.690441	1.95643	2.47969	1.95643	1.95643		0.39206	0.406224	0.102542	0.675125	-0.0377524	0.287086	0.117461	0.192617	1.45214	-0.00844679	-0.0317958	1.2392	1.38589	0.88528	0.440076	0.372928	-0.00844679	0.372928	0.180182	0.329899	0.234496	0.0332241	-0.0505431	1.11384	1.23772
208	3.54399	3.3929	3.45315	4.37497	3.45315	4.37497	3.1354	3.54399	0.996203	4.86835	3.8145	3.54399	5.76761	6.22234	4.32696	6.8579	3.34941	6.29014	0.677077	2.33085	2.4835	2.33085	2.33085		0.381148	0.447715	0.188411	0.685015	0.0501782	0.227759	0.10479	0.145001	1.53311	0.0426914	-0.0368187	1.26536	1.28748	0.852683	0.450383	0.265356	0.0426914	0.265356	0.217236	0.284074	0.142249	0.0660609	-0.0622351	1.02591	1.14266
209	3.46313	3.41013	3.35738	4.44977	3.35738	4.44977	3.10235	3.46313	0.966371	4.83186	3.83421	3.46313	5.82556	6.2778	4.24041	6.43399	3.35714	6.10379	0.729688	2.50651	2.81598	2.50651	2.50651		0.347228	0.450912	0.12093	0.716428	0.0549264	0.256571	0.0941785	0.196147	1.45128	-0.0292431	-0.0436807	1.18942	1.4256	0.765381	0.483855	0.39311	-0.0292431	0.39311	0.228996	0.250286	0.0763531	0.0264368	-0.0351626	1.05067	1.16958
210	3.73129	3.39849	3.36906	4.57499	3.36906	4.57499	3.15609	3.73129	0.884356	4.6922	3.77739	3.73129	5.91405	6.74261	4.28234	6.29748	3.43614	6.18273	0.614667	1.8954	3.10822	1.8954	1.8954		0.372	0.416856	0.169818	0.702974	0.156741	0.274652	0.120506	0.161438	1.52706	-0.0303162	-0.0449859	1.34158	1.40129	0.742011	0.379917	0.237438	-0.0303162	0.237438	0.237577	0.231625	0.143419	0.049108	-0.0436009	1.09554	1.28417
211	3.74111	3.38634	3.34082	4.42085	3.34082	4.42085	3.25119	3.74111	0.89139	4.79127	3.7959	3.74111	5.99042	6.55073	4.21026	6.56681	3.33675	6.32417	0.714782	1.9397	2.51412	1.9397	1.9397		0.412771	0.426526	0.139922	0.652698	-0.0277746	0.246594	0.137276	0.174253	1.50655	0.0230224	0.0147847	1.03615	1.32294	0.747288	0.504925	0.327552	0.0230224	0.327552	0.190201	0.286853	0.111765	0.084621	-0.137328	1.15292	1.23901
212	3.64993	3.42233	3.29703	4.6703	3.29703	4.6703	3.13158	3.64993	0.975032	4.83175	3.75904	3.64993	6.13812	6.69912	4.47097	6.85898	3.35723	6.12852	0.664669	2.20173	2.68273	2.20173	2.20173		0.325318	0.407839	0.133565	0.717055	0.00492125	0.262005	0.0703662	0.189601	1.61227	-0.0138589	-0.0795925	1.35729	1.27037	0.859066	0.518279	0.533011	-0.0138589	0.533011	0.191895	0.301679	0.165365	0.055552	-0.084836	1.04827	1.115
213	3.52124	3.38141	3.32781	4.59579	3.32781	4.59579	3.14607	3.52124	0.893153	5.08296	3.72712	3.52124	5.90758	6.39345	4.41846	6.55844	3.3655	5.89213	0.677826	1.62182	2.81408	1.62182	1.62182		0.460645	0.429484	0.195717	0.647381	-0.00752029	0.280613	0.077312	0.121013	1.49285	-0.018332	-0.0522236	1.29228	1.40134	0.942857	0.442379	0.4041	-0.018332	0.4041	0.203559	0.268374	0.188526	0.0284237	-0.0281247	1.13699	1.19956
214	3.58554	3.44437	3.35833	4.7336	3.35833	4.7336	2.97091	3.58554	0.907205	4.92274	3.7809	3.58554	6.25075	6.40699	4.26677	6.92184	3.3681	6.22385	0.776826	2.31835	2.55796	2.31835	2.31835		0.407199	0.428968	0.142693	0.702649	-0.0317117	0.258514	0.11	0.178049	1.56033	-0.0263745	-0.0353455	1.23365	1.361	0.953775	0.537811	0.406972	-0.0263745	0.406972	0.194986	0.298964	0.0519997	0.0162264	-0.00814407	1.05453	1.18919
215	3.68343	3.46508	3.4074	4.48336	3.4074	4.48336	3.06678	3.68343	0.962503	4.98134	3.81389	3.68343	5.98415	6.07461	4.37126	6.83506	3.34451	6.21936	0.719379	2.36007	2.99395	2.36007	2.36007		0.393758	0.376774	0.196656	0.752193	-0.080395	0.261946	0.0982914	0.156718	1.4106	-0.0813517	-0.000946491	1.21989	1.55858	0.868009	0.503669	0.506881	-0.0813517	0.506881	0.182858	0.227416	0.143442	0.0613179	-0.127702	1.00066	1.18416
216	3.56219	3.43032	3.39531	4.59732	3.39531	4.59732	3.11943	3.56219	0.978541	5.04035	3.76656	3.56219	6.09883	6.42581	4.43877	6.75806	3.35542	5.99404	0.670205	1.98978	2.49149	1.98978	1.98978		0.395579	0.42846	0.135525	0.705446	-0.0455358	0.236988	0.0573178	0.196917	1.57504	-0.0305227	-0.0317958	1.15605	1.64519	0.988368	0.512663	0.365774	-0.0305227	0.365774	0.139368	0.168999	0.075241	0.0273336	-0.0678247	1.08481	1.1294
217	3.62862	3.45744	3.39583	4.59437	3.39583	4.59437	2.98366	3.62862	0.924063	4.83013	3.76612	3.62862	6.22079	6.10039	4.19984	6.68074	3.42216	6.23315	0.742829	2.35921	2.72374	2.35921	2.35921		0.437803	0.391129	0.156501	0.677273	0.118305	0.25338	0.0656173	0.118376	1.49584	0.0303653	-0.0544681	1.17689	1.62421	0.995441	0.489741	0.468527	0.0303653	0.468527	0.154047	0.206658	0.146676	0.0357168	-0.0487148	1.00415	1.23484
218	3.85337	3.41582	3.38102	4.5325	3.38102	4.5325	3.26909	3.85337	0.954528	4.8564	3.76614	3.85337	5.73438	6.21678	4.49004	6.68055	3.37588	6.21708	0.69278	1.78326	3.12938	1.78326	1.78326		0.485576	0.423897	0.10882	0.679676	0.0177229	0.257767	0.11625	0.0761255	1.56743	0.0556923	0.0692061	1.27602	1.52364	0.877003	0.450079	0.522753	0.0556923	0.522753	0.153327	0.195223	0.0931679	0.0420908	-0.12855	1.01142	1.28923
219	3.62141	3.47029	3.38434	4.53948	3.38434	4.53948	3.10394	3.62141	0.862312	4.72286	3.76143	3.62141	6.124	6.33799	4.30826	6.45688	3.42216	6.39584	0.64596	1.94893	2.354	1.94893	1.94893		0.355986	0.418163	0.169729	0.721442	-0.0606817	0.263525	0.165404	0.208829	1.51505	-0.0266533	-0.0620222	1.12871	1.66365	0.924896	0.582422	0.446734	-0.0266533	0.446734	0.155049	0.182402	0.134086	0.114068	-0.0956492	1.02108	1.23476
220	3.67849	3.44748	3.38222	4.73321	3.38222	4.73321	3.27002	3.67849	0.984753	4.6284	3.78933	3.67849	5.83256	6.09465	4.20959	6.68004	3.36264	6.26446	0.713143	2.34179	2.83866	2.34179	2.34179		0.40032	0.364225	0.145701	0.645559	-0.0108558	0.275224	0.0498287	0.101324	1.66047	0.0442881	-0.0594119	1.19293	1.73598	1.03977	0.496321	0.443758	0.0442881	0.443758	0.121508	0.219643	0.108813	0.100138	-0.139331	0.998879	1.20661
221	3.72174	3.37854	3.3159	4.36198	3.3159	4.36198	2.94558	3.72174	0.98412	4.71743	3.60578	3.72174	5.64507	6.11013	4.34859	6.62067	3.36667	6.1883	0.633504	2.17234	2.60615	2.17234	2.17234		0.3962	0.406516	0.197621	0.602005	-0.108042	0.253633	0.1187	0.206305	1.49818	0.029555	-0.0569598	1.30933	1.50932	0.936836	0.398816	0.49652	0.029555	0.49652	0.130795	0.175258	0.15107	0.0132642	-0.068869	1.06342	1.15173
222	3.80073	3.39507	3.35278	4.5082	3.35278	4.5082	3.04391	3.80073	0.849578	4.39618	3.75134	3.80073	5.83899	6.45725	4.33188	6.74918	3.33593	6.1258	0.603976	2.32257	3.26508	2.32257	2.32257		0.362446	0.392367	0.133095	0.687337	-0.0698467	0.245476	0.159324	0.236828	1.59235	0.0264326	-0.000778402	1.18803	1.77048	1.08254	0.52553	0.5709	0.0264326	0.5709	0.141671	0.0926308	0.189684	0.00737227	-0.111443	0.981634	1.18508
223	3.57722	3.42979	3.35791	4.38564	3.35791	4.38564	3.22799	3.57722	0.906024	4.42863	3.72262	3.57722	5.6247	5.82857	4.44161	6.62003	3.4108	6.36276	0.738565	2.15605	2.49721	2.15605	2.15605		0.441394	0.452185	0.130084	0.730125	0.0864804	0.272014	0.120063	0.124809	1.56158	-0.00982124	-0.0748959	1.46941	1.90016	0.956722	0.540042	0.511615	-0.00982124	0.511615	0.12592	0.148013	0.233315	0.0507628	0.0185413	0.989381	1.24455
224	3.66483	3.37399	3.40238	4.49851	3.40238	4.49851	3.04205	3.66483	0.938748	4.69699	3.63188	3.66483	5.61741	6.08231	4.56418	6.7774	3.3818	6.3384	0.67905	2.09063	2.23097	2.09063	2.09063		0.41681	0.378296	0.161246	0.729546	0.0788174	0.244293	0.0979554	0.19428	1.57527	-0.0273518	0.0121348	1.41817	1.82193	0.972504	0.577219	0.438366	-0.0273518	0.438366	0.168138	0.147831	0.185891	0.0494653	-0.117363	0.987873	1.14837
225	3.5496	3.41383	3.33556	4.37516	3.33556	4.37516	3.26942	3.5496	0.896507	4.69295	3.82356	3.5496	5.72001	6.2458	4.49462	6.56865	3.34091	6.36282	0.731009	2.44661	2.69486	2.44661	2.44661		0.443627	0.415782	0.18241	0.723393	0.106344	0.250864	0.0891398	0.212358	1.57737	0.00305216	-0.0862963	1.23179	1.75344	0.989393	0.54148	0.414154	0.00305216	0.414154	0.138635	0.122873	0.226821	0.0850918	-0.136544	1.14661	1.21635
226	3.64449	3.47773	3.3805	4.41849	3.3805	4.41849	3.18602	3.64449	0.896183	4.72326	3.77352	3.64449	6.06437	6.76496	4.50012	7.0756	3.4071	6.39432	0.672321	1.45737	2.59696	1.45737	1.45737		0.41264	0.398831	0.197674	0.804964	0.0681497	0.261238	0.0365084	0.247868	1.52314	0.0180087	0.0147451	1.27297	1.7964	1.06752	0.488328	0.507751	0.0180087	0.507751	0.0785017	0.113434	0.154499	0.00352461	-0.169222	1.10793	1.21837
227	3.65618	3.46858	3.33687	4.43384	3.33687	4.43384	3.37289	3.65618	0.869209	4.8553	3.86398	3.65618	5.93308	5.92836	4.3304	6.31657	3.34776	6.17748	0.715036	2.26008	2.66456	2.26008	2.26008		0.421926	0.360082	0.108291	0.761804	0.123985	0.265417	0.114647	0.190515	1.37885	-0.0477046	-0.0444124	1.45762	1.75271	0.993313	0.521277	0.446075	-0.0477046	0.446075	0.0991477	0.148095	0.20014	0.0806472	-0.0980321	1.02571	1.21557
228	3.54212	3.46238	3.39845	4.52448	3.39845	4.52448	3.20545	3.54212	0.921889	4.84353	3.79562	3.54212	6.10652	6.29505	4.46204	6.55742	3.43495	6.21215	0.75511	2.20363	3.4053	2.20363	2.20363		0.406476	0.469857	0.157371	0.658409	-0.0309906	0.305714	0.135318	0.150152	1.60101	-0.0209794	-0.0689337	1.41455	1.96586	1.19321	0.462081	0.414023	-0.0209794	0.414023	0.0811921	0.186557	0.224653	0.0494527	-0.0818516	1.04423	1.07772
229	3.67077	3.43222	3.36914	4.48056	3.36914	4.48056	3.29585	3.67077	0.976007	4.98452	3.8864	3.67077	6.17704	6.01721	4.57347	6.76941	3.40039	6.29596	0.738836	1.54503	3.06476	1.54503	1.54503		0.48934	0.449838	0.158525	0.66996	0.0520117	0.265839	0.140413	0.0975071	1.57458	0.0119286	-0.0236188	1.24804	1.94479	1.17564	0.540614	0.576813	0.0119286	0.576813	0.0625377	0.193409	0.265525	-0.0333434	-0.150667	0.973212	1.1396
230	3.667	3.48865	3.39219	4.6586	3.39219	4.6586	3.03653	3.667	0.994166	4.52644	3.73335	3.667	6.29593	6.36043	4.70008	6.39117	3.35338	6.56512	0.799321	3.0909	2.70361	3.0909	3.0909		0.404742	0.417157	0.210627	0.735036	-0.126854	0.288809	0.142701	0.12997	1.58294	-0.0156384	-0.0335459	1.29083	1.76997	1.15431	0.526614	0.526552	-0.0156384	0.526552	0.0403428	0.10136	0.140205	0.0694952	-0.142671	0.969045	1.13868
231	3.6336	3.39557	3.3666	4.41859	3.3666	4.41859	3.24818	3.6336	0.949051	4.634	3.77759	3.6336	5.70651	5.54776	4.54969	6.68429	3.43733	6.39072	0.661869	1.828	2.62546	1.828	1.828		0.497586	0.407719	0.14339	0.741188	-0.118019	0.28227	0.0655159	0.234694	1.50415	0.0123743	-0.0286812	1.3058	1.88307	1.06311	0.505607	0.578137	0.0123743	0.578137	0.0818345	0.107501	0.227139	0.0401726	-0.109392	1.07489	1.20771
232	3.62749	3.44082	3.36165	4.52163	3.36165	4.52163	3.29984	3.62749	0.878913	4.71593	3.74835	3.62749	5.97278	6.656	4.19898	6.59199	3.38851	6.18779	0.752263	1.75689	2.51233	1.75689	1.75689		0.421739	0.406395	0.148987	0.775827	0.0392394	0.300859	0.154778	0.202672	1.54671	-0.0397727	-0.0332987	1.20866	2.02117	1.09012	0.548852	0.578175	-0.0397727	0.578175	0.0377916	0.0886669	0.1962	-0.0485028	-0.063019	1.07406	1.18112
233	3.52962	3.43964	3.37699	4.44382	3.37699	4.44382	3.30586	3.52962	0.89466	4.75646	3.81647	3.52962	5.77981	6.16317	4.55389	6.63932	3.44137	6.53855	0.76464	1.62019	2.52103	1.62019	1.62019		0.381343	0.422409	0.131191	0.797941	-0.0338751	0.285682	0.140394	0.116088	1.56755	0.0129859	-0.0769822	1.3141	1.91889	1.20554	0.565447	0.599126	0.0129859	0.599126	0.0315962	0.0380677	0.153091	-0.0580126	-0.158512	0.99713	1.16008
234	3.60978	3.47723	3.40766	4.30891	3.40766	4.30891	2.96632	3.60978	0.924525	4.61529	3.67882	3.60978	6.1355	5.6009	4.33144	6.51594	3.39181	6.3348	0.688628	2.02297	2.32936	2.02297	2.02297		0.492874	0.488476	0.149625	0.717751	0.00131484	0.266742	0.182004	0.219438	1.62684	-0.0217817	-0.0318354	1.32346	1.95569	1.2727	0.563948	0.63342	-0.0217817	0.63342	0.0575588	0.104449	0.254399	0.0796482	-0.0967424	0.981831	1.20222
235	3.5163	3.4913	3.33299	4.51415	3.33299	4.51415	3.4048	3.5163	0.835955	4.88966	3.77421	3.5163	6.17426	6.20389	4.45541	6.36859	3.35293	6.33575	0.748874	2.17277	2.34894	2.17277	2.17277		0.474679	0.489327	0.183329	0.593507	-0.109635	0.237228	0.166076	0.210491	1.5307	0.0571626	-0.00776894	1.19909	1.90086	1.33922	0.537374	0.560569	0.0571626	0.560569	0.116751	0.0554176	0.282204	0.0585492	-0.111047	0.963472	1.18672
236	3.67174	3.43029	3.36607	4.39931	3.36607	4.39931	3.06503	3.67174	0.837136	4.93123	3.86049	3.67174	6.04808	5.87235	4.40154	6.86126	3.37024	6.27578	0.686161	2.73449	2.51466	2.73449	2.73449		0.486602	0.465774	0.181187	0.677041	0.0386689	0.272995	0.154801	0.239465	1.54988	0.0366203	-0.0187145	1.2408	2.13789	1.25797	0.625947	0.516461	0.0366203	0.516461	0.0558996	0.087473	0.222279	-0.0149444	-0.151831	1.06649	1.13976
237	3.5672	3.44662	3.43606	4.38141	3.43606	4.38141	3.35029	3.5672	0.912511	4.77453	3.85055	3.5672	6.20495	6.30006	4.51486	6.53269	3.38456	6.216	0.721416	2.41549	2.86205	2.41549	2.41549		0.417092	0.410788	0.137691	0.638721	0.0522523	0.272982	0.182132	0.232694	1.52148	-0.0575029	-0.0270102	1.25179	1.98135	1.24175	0.571955	0.578823	-0.0575029	0.578823	0.102529	0.0126275	0.106337	-0.0335381	-0.125803	1.00844	1.11365
238	3.53851	3.46882	3.34482	4.43079	3.34482	4.43079	3.21305	3.53851	0.966234	4.86662	3.79976	3.53851	5.97609	6.19035	4.38108	6.17442	3.40319	6.18539	0.730229	1.99487	2.50667	1.99487	1.99487		0.516519	0.474301	0.131584	0.738843	0.0333199	0.294535	0.135548	0.186861	1.56286	-0.0356967	-0.0735907	1.44277	2.07957	1.32562	0.606037	0.519464	-0.0356967	0.519464	0.0349015	0.0687844	0.201457	0.00601592	-0.152353	1.00819	1.25123
239	3.54953	3.42491	3.38306	4.43305	3.38306	4.43305	3.46302	3.54953	0.84749	4.52557	3.77488	3.54953	6.05536	5.8589	4.42159	6.18083	3.38363	5.80149	0.695961	2.68976	1.89696	2.68976	2.68976		0.443569	0.378425	0.173636	0.743974	0.206055	0.286904	0.103404	0.128749	1.5593	-0.0412272	-0.0215325	1.31078	2.10531	1.14465	0.640508	0.602776	-0.0412272	0.602776	0.085174	0.0213204	0.195383	0.0926036	-0.146614	1.08085	1.23753
240	3.63841	3.457	3.4136	4.47185	3.4136	4.47185	3.4645	3.63841	0.884492	4.78371	3.79534	3.63841	5.97228	6.40754	4.64242	6.50509	3.4537	6.11384	0.699223	1.48185	2.68898	1.48185	1.48185		0.476196	0.470735	0.22351	0.624652	-0.0286464	0.263031	0.118336	0.231585	1.5518	-0.0385336	-0.0213743	1.28604	1.94661	1.35311	0.635841	0.600979	-0.0385336	0.600979	0.0634848	0.0523191	0.29853	-0.0594489	-0.159328	1.06705	1.18395
241	3.58971	3.42813	3.36173	4.39739	3.36173	4.39739	3.31128	3.58971	0.974039	4.76939	3.76796	3.58971	5.78103	6.2855	4.57163	6.53161	3.41078	6.1055	0.774774	2.89128	2.45951	2.89128	2.89128		0.437744	0.442153	0.137611	0.630735	-0.0352281	0.317446	0.159333	0.183445	1.65626	-0.056168	0.0104539	1.36321	2.0563	1.2153	0.637596	0.660116	-0.056168	0.660116	0.08187	0.0553713	0.234962	-0.00299931	-0.112812	1.12778	1.26436
242	3.70203	3.52042	3.41379	4.29982	3.41379	4.29982	3.20933	3.70203	0.847781	4.44549	3.78524	3.70203	6.39309	6.49527	4.85515	6.50808	3.44816	6.23833	0.704314	2.15157	2.54414	2.15157	2.15157		0.432361	0.397722	0.224961	0.719318	0.0868414	0.319662	0.0639777	0.220668	1.57282	0.010395	-0.0271783	1.49992	2.2236	1.49592	0.587003	0.617907	0.010395	0.617907	0.108489	-0.0109823	0.182224	0.000227623	-0.110635	1.14202	1.31221
243	3.67545	3.3915	3.42601	4.47215	3.42601	4.47215	3.5776	3.67545	0.916806	4.58775	3.92609	3.67545	6.21146	6.64894	4.64984	6.58762	3.39812	6.36409	0.812335	2.86214	2.61828	2.86214	2.86214		0.440513	0.425203	0.188764	0.740376	0.10352	0.284031	0.163474	0.248093	1.66837	-0.0174033	-0.0217797	1.2643	2.1913	1.3793	0.566276	0.73292	-0.0174033	0.73292	0.0788958	-0.0559408	0.155294	0.0400927	-0.161093	1.12406	1.19872
244	3.62254	3.40689	3.32831	4.29736	3.32831	4.29736	3.24463	3.62254	0.781597	5.00293	3.90106	3.62254	6.15805	6.47441	4.75123	6.49982	3.37485	6.04869	0.760758	2.82844	2.33746	2.82844	2.82844		0.459836	0.423853	0.196434	0.696241	0.0878032	0.31571	0.0917971	0.158452	1.61817	0.00905215	-0.0433544	1.33874	2.10866	1.23898	0.54851	0.637534	0.00905215	0.637534	0.0665747	-0.0322035	0.0743445	0.0474434	-0.155781	1.12776	1.1784
245	3.57057	3.42292	3.42041	4.20612	3.42041	4.20612	3.1406	3.57057	0.920623	4.77003	3.80933	3.57057	5.80891	5.98437	4.67501	6.93598	3.41319	6.23321	0.775712	2.14407	2.1539	2.14407	2.14407		0.449213	0.399511	0.16227	0.615772	-0.111559	0.328937	0.0960622	0.231401	1.59378	-0.0360307	-0.0805318	1.52758	2.24256	1.45044	0.601125	0.595725	-0.0360307	0.595725	0.0845723	-0.00845847	0.0877752	0.0499935	-0.171573	1.15283	1.23414
246	3.66282	3.42233	3.38353	4.35647	3.38353	4.35647	3.37152	3.66282	0.903679	4.74052	3.84129	3.66282	6.01763	6.371	4.65054	6.22504	3.45715	6.137	0.746345	2.71286	2.81484	2.71286	2.71286		0.505564	0.427739	0.16513	0.770766	0.0384889	0.288523	0.0861504	0.203719	1.60639	-0.0504298	-0.0340799	1.53245	2.1096	1.23778	0.608584	0.607075	-0.0504298	0.607075	0.127303	-0.0261813	0.151661	0.00660161	-0.241457	1.08928	1.21514
247	3.60892	3.45258	3.39934	4.41569	3.39934	4.41569	3.2686	3.60892	0.987406	4.92823	3.78343	3.60892	6.24134	6.37045	4.71821	6.77524	3.39742	6.13719	0.804221	2.33024	3.04099	2.33024	2.33024		0.409056	0.411355	0.161372	0.589084	0.0692612	0.315671	0.1672	0.35406	1.57475	-0.0234101	-0.0169644	1.30392	2.19911	1.39883	0.593461	0.65085	-0.0234101	0.65085	0.0589	0.016436	0.176241	0.0236582	-0.163412	1.06125	1.34456
248	3.68954	3.42517	3.38835	4.34964	3.38835	4.34964	3.51894	3.68954	0.919579	4.41171	3.82906	3.68954	6.00629	6.76978	4.8494	6.69672	3.43126	6.29406	0.727031	2.05899	2.07911	2.05899	2.05899		0.479658	0.3787	0.142947	0.679444	-0.00385414	0.296913	0.139026	0.147597	1.54042	0.0543889	-0.0866621	1.50022	2.04613	1.64573	0.541187	0.673988	0.0543889	0.673988	0.110273	0.0513803	0.310575	0.0463406	-0.185181	1.05594	1.30825
249	3.62715	3.46175	3.37348	4.26952	3.37348	4.26952	3.28737	3.62715	0.91441	4.81835	3.68998	3.62715	6.36841	6.12079	4.41335	6.38229	3.3746	6.2093	0.687402	2.05046	2.76551	2.05046	2.05046		0.46691	0.46727	0.153067	0.775201	-0.0529884	0.282855	0.102621	0.187303	1.62753	0.0537141	-0.0495638	1.48469	2.12905	1.39811	0.485867	0.657548	0.0537141	0.657548	0.00185809	-0.0724331	0.208734	0.059331	-0.176109	1.06044	1.14584
250	3.64629	3.44371	3.34409	4.34324	3.34409	4.34324	3.35609	3.64629	0.837752	4.73614	3.75955	3.64629	6.3813	6.51197	4.56128	6.71074	3.48088	6.11163	0.746567	1.70802	2.28334	1.70802	1.70802		0.415531	0.448945	0.213364	0.777406	-0.0464672	0.274484	0.180834	0.196014	1.66363	-0.0342184	-0.0291361	1.36391	2.04901	1.67401	0.580326	0.731151	-0.0342184	0.731151	0.15516	0.0147051	0.151037	-0.0255107	-0.152004	1.11577	1.10652
251	3.58587	3.44868	3.35511	4.47013	3.35511	4.47013	3.11658	3.58587	0.880334	4.64179	3.82626	3.58587	6.29114	6.13999	4.61695	6.80176	3.43711	5.9979	0.744261	1.86799	2.52886	1.86799	1.86799		0.386416	0.40802	0.193783	0.702938	-0.0351078	0.294034	0.139431	0.255348	1.65489	-0.140586	-0.0511557	1.64452	2.25233	1.54005	0.592657	0.715815	-0.140586	0.715815	0.056764	0.00980234	0.23839	-0.0280259	-0.180922	1.11174	1.26654
252	3.56346	3.43824	3.37034	4.39941	3.37034	4.39941	3.27095	3.56346	0.803949	5.04347	3.86872	3.56346	6.47507	6.40105	4.58689	6.96174	3.49902	6.06919	0.689741	1.82334	2.63215	1.82334	1.82334		0.462423	0.415542	0.187687	0.685875	0.0254465	0.330107	0.088845	0.237762	1.69906	0.00452253	-0.0663134	1.56223	2.24486	1.45041	0.578498	0.731503	0.00452253	0.731503	0.0452586	-0.0541452	0.252264	0.000125336	-0.148078	1.08272	1.17283
253	3.6527	3.41539	3.44998	4.44692	3.44998	4.44692	3.21196	3.6527	0.799345	5.11275	3.90402	3.6527	6.12588	5.92196	4.63059	6.84223	3.43171	6.30887	0.791574	2.19863	2.55584	2.19863	2.19863		0.489514	0.438673	0.200358	0.748676	-0.0519661	0.300293	0.170374	0.20179	1.51672	-0.0283775	-0.077961	1.64695	2.20839	1.74577	0.572662	0.67659	-0.0283775	0.67659	0.0564671	-0.0133052	0.279557	-0.011349	-0.225237	1.06973	1.2959
254	3.60331	3.4232	3.36741	4.49585	3.36741	4.49585	3.35932	3.60331	0.817162	4.81997	3.85072	3.60331	6.37983	6.41867	4.90311	6.67388	3.45847	6.45973	0.773278	2.37679	2.69426	2.37679	2.37679		0.412214	0.368059	0.164155	0.624652	0.145652	0.300976	0.160632	0.225809	1.50734	-0.00995666	-0.0358794	1.50137	2.1899	1.65638	0.491765	0.635653	-0.00995666	0.635653	0.0303167	-0.0513761	0.243442	0.0859872	-0.22367	1.03035	1.23543
255	3.53159	3.45089	3.34461	4.33149	3.34461	4.33149	3.28944	3.53159	0.874788	4.91281	3.95164	3.53159	6.33149	6.39484	4.64877	6.26304	3.41185	6.12978	0.770829	2.15769	2.2586	2.15769	2.15769		0.489594	0.437581	0.13455	0.719481	-0.0236583	0.306747	0.136124	0.0866003	1.57224	-0.0491343	-0.0607962	1.62993	2.35707	1.86894	0.565593	0.649228	-0.0491343	0.649228	0.0722104	-0.104726	0.318341	-0.0290137	-0.170758	1.02012	1.26312
256	3.59212	3.48601	3.37097	4.45577	3.37097	4.45577	3.10974	3.59212	0.901762	4.825	3.76527	3.59212	6.70209	6.46031	4.59383	6.63348	3.41012	6.15686	0.823916	2.56193	2.09412	2.56193	2.56193		0.451164	0.418559	0.190047	0.654822	-0.0535892	0.298513	0.138353	0.198343	1.70331	-0.0370948	-0.0519369	1.58828	2.25126	1.75271	0.584152	0.756114	-0.0370948	0.756114	0.0903736	-0.0579633	0.167681	-0.0444604	-0.285075	1.01539	1.36571
257	3.71326	3.48215	3.34945	4.50372	3.34945	4.50372	3.25519	3.71326	0.809409	4.72811	3.8408	3.71326	6.147	5.79509	4.65348	6.87547	3.41056	6.41127	0.808962	1.96608	2.51358	1.96608	1.96608		0.472821	0.41102	0.208134	0.670737	0.0475344	0.326122	0.147685	0.140404	1.68673	-0.0340356	-0.0497319	1.72447	2.25079	1.95102	0.483869	0.711293	-0.0340356	0.711293	0.00726526	-0.115624	0.252934	-0.092032	-0.190493	0.966841	1.27332
258	3.59693	3.44084	3.42988	4.30832	3.42988	4.30832	3.04003	3.59693	0.832754	5.04439	3.8514	3.59693	6.14917	5.87634	4.46264	6.51124	3.40926	6.11074	0.748524	3.01272	2.5541	3.01272	3.01272		0.448454	0.500536	0.195485	0.646232	-0.0996884	0.309958	0.133605	0.205289	1.76348	0.046545	-0.0274156	1.71972	2.09293	1.96952	0.544709	0.750962	0.046545	0.750962	0.0736555	-0.129666	0.249119	-0.0910218	-0.191783	1.0666	1.17859
259	3.59499	3.47635	3.35241	4.48808	3.35241	4.48808	3.3701	3.59499	0.85473	5.1907	3.81401	3.59499	6.55418	6.33168	4.85395	6.78102	3.50922	6.23441	0.823741	1.84489	2.65091	1.84489	1.84489		0.482201	0.427928	0.191115	0.597616	-0.0736937	0.332538	0.169835	0.303323	1.66547	0.0423573	-0.0342875	1.74978	2.22725	1.96586	0.567689	0.700089	0.0423573	0.700089	5.78026e-06	-0.122094	0.253536	0.0106791	-0.263568	1.019	1.25494
260	3.58073	3.49159	3.33933	4.45695	3.33933	4.45695	3.28824	3.58073	0.857434	4.82084	3.92108	3.58073	6.47863	6.6303	4.69364	6.81883	3.41568	6.34656	0.808532	2.99419	2.43955	2.99419	2.99419		0.425084	0.407427	0.171729	0.636446	-0.0303595	0.344867	0.14886	0.264941	1.59613	0.00652554	-0.0354246	1.67504	2.17883	1.94441	0.602162	0.715963	0.00652554	0.715963	0.00757661	-0.137065	0.263856	-0.0902399	-0.226924	1.14552	1.2111
261	3.60484	3.46556	3.40868	4.32539	3.40868	4.32539	3.21114	3.60484	0.812096	4.81252	3.99623	3.60484	6.44523	6.56409	4.65935	6.98559	3.45318	6.37781	0.829882	2.29284	2.7536	2.29284	2.29284		0.528406	0.479132	0.214799	0.853719	-0.18852	0.30977	0.153995	0.269342	1.66826	0.0239929	-0.0429886	1.72174	2.16446	2.11822	0.474352	0.75351	0.0239929	0.75351	-0.00558136	-0.0782013	0.327242	-0.155969	-0.220455	1.08299	1.34811
262	3.62147	3.49369	3.37343	4.45631	3.37343	4.45631	3.33738	3.62147	0.83248	5.0135	3.92357	3.62147	6.57186	6.53756	4.72885	7.28777	3.45491	6.26345	0.741365	1.91936	2.39142	1.91936	1.91936		0.482006	0.434693	0.149559	0.659513	-0.00866213	0.273898	0.136723	0.296849	1.62809	0.0604442	-0.0188826	1.86608	2.16421	2.11235	0.568068	0.821792	0.0604442	0.821792	0.0197046	-0.0809898	0.220407	-0.0861863	-0.205779	1.14954	1.17068
263	3.51256	3.5123	3.34048	4.40723	3.34048	4.40723	3.33185	3.51256	0.86998	5.10952	3.87742	3.51256	6.30633	6.63169	4.76686	6.40772	3.39923	6.22632	0.827273	2.39282	2.84035	2.39282	2.39282		0.473876	0.427627	0.132818	0.651131	-0.0258519	0.324517	0.136741	0.24674	1.53537	0.00430023	0.0300314	1.69499	2.37566	2.02597	0.459352	0.67434	0.00430023	0.67434	0.033463	-0.160191	0.274006	-0.125638	-0.263393	1.0268	1.29615
264	3.51149	3.45499	3.39955	4.57868	3.39955	4.57868	3.28217	3.51149	0.870099	4.75848	3.83707	3.51149	6.56683	6.50557	4.59288	6.74569	3.40253	6.12909	0.842084	2.87386	2.44972	2.87386	2.87386		0.557716	0.485124	0.184394	0.793112	-0.0705981	0.316978	0.13056	0.273559	1.65554	-0.00956734	-0.0168359	1.78491	2.21413	2.19013	0.496175	0.656956	-0.00956734	0.656956	0.0300198	-0.111487	0.196893	-0.19371	-0.264857	0.945986	1.28772
265	3.54151	3.54984	3.35432	4.42282	3.35432	4.42282	3.07713	3.54151	0.864554	4.97545	3.95703	3.54151	6.94928	6.90287	4.83424	6.7958	3.44032	6.11068	0.782617	1.39384	2.09026	1.39384	1.39384		0.413695	0.448351	0.155649	0.688034	0.0253262	0.311693	0.12718	0.237844	1.63107	-0.0259299	-0.0219478	1.78539	2.43393	2.15412	0.53903	0.831809	-0.0259299	0.831809	0.00715491	-0.177349	0.221893	-0.136204	-0.174589	0.99286	1.22884
266	3.52318	3.52289	3.43651	4.54774	3.43651	4.54774	3.32764	3.52318	0.814715	4.97101	3.83727	3.52318	6.61066	6.5766	4.6847	7.13916	3.39683	6.3193	0.852727	3.1171	2.28563	3.1171	3.1171		0.435042	0.388259	0.17848	0.651444	0.248428	0.288451	0.135397	0.208367	1.59462	0.0138368	-0.0243109	1.71008	2.30598	2.40381	0.454782	0.759986	0.0138368	0.759986	0.0122153	-0.161412	0.21809	-0.111074	-0.332509	0.934846	1.24636
267	3.66075	3.42068	3.43297	4.49217	3.43297	4.49217	3.52611	3.66075	0.863339	5.54359	3.80377	3.66075	6.33727	6.93745	4.68171	7.25295	3.43861	6.21651	0.792416	2.33964	2.65271	2.33964	2.33964		0.57889	0.420037	0.176469	0.668369	-0.0245898	0.300748	0.134775	0.272194	1.7402	-0.0198825	-0.0413077	1.90422	2.45994	2.25383	0.534875	0.756058	-0.0198825	0.756058	-0.0369511	-0.0815278	0.343115	-0.122352	-0.201868	0.996675	1.36808
268	3.47649	3.54229	3.40772	4.61389	3.40772	4.61389	3.26219	3.47649	0.86404	5.06327	3.91783	3.47649	6.37373	7.2039	4.74637	6.69761	3.40963	6.10847	0.820909	2.7688	2.46327	2.7688	2.7688		0.451872	0.390132	0.162892	0.641635	0.104963	0.321567	0.160678	0.236675	1.75337	0.039974	0.0125798	2.08022	2.26879	2.03822	0.571662	0.62496	0.039974	0.62496	-0.0349254	-0.194124	0.306614	-0.163044	-0.317444	1.00664	1.43316
269	3.55695	3.5137	3.41169	4.47303	3.41169	4.47303	3.23489	3.55695	0.792738	4.61899	3.91958	3.55695	6.75542	7.12312	4.55727	6.84198	3.45685	6.11309	0.81671	3.41042	2.50439	3.41042	3.41042		0.496502	0.403722	0.207939	0.63308	-0.0352281	0.292377	0.116453	0.348673	1.79375	0.000771552	-0.0357509	1.93456	2.47354	2.26821	0.533572	0.654037	0.000771552	0.654037	-0.00520828	-0.151061	0.343955	-0.20833	-0.328226	0.966036	1.34768
270	3.51747	3.50735	3.39049	4.55379	3.39049	4.55379	3.02739	3.51747	0.831795	5.38787	3.91266	3.51747	6.43033	6.5332	4.65067	6.92869	3.51867	6.37313	0.752502	1.94436	2.27372	1.94436	1.94436		0.46785	0.439257	0.193571	0.597721	0.0422451	0.332206	0.126171	0.222823	1.73266	0.00412532	-0.0245976	1.89612	2.35457	2.3252	0.426379	0.734977	0.00412532	0.734977	0.0335878	-0.0937557	0.290843	-0.212901	-0.282258	0.936803	1.27278
271	3.50003	3.49297	3.42468	4.47658	3.42468	4.47658	3.03964	3.50003	0.759689	5.44537	3.9565	3.50003	6.56297	6.46588	4.69658	7.04629	3.48399	6.18393	0.845346	2.08873	2.4792	2.08873	2.08873		0.420611	0.407229	0.170512	0.702277	0.00870774	0.26801	0.134973	0.290458	1.66339	-0.00128675	-0.0114076	1.98671	2.27155	2.32958	0.524811	0.733902	-0.00128675	0.733902	0.0730472	-0.143862	0.187084	-0.259577	-0.269718	1.02652	1.39534
272	3.54529	3.48743	3.36976	4.41874	3.36976	4.41874	3.271	3.54529	0.78134	5.29907	3.92205	3.54529	6.64487	6.51438	4.70649	7.03678	3.43445	6.45442	0.8526	2.77095	2.21384	2.77095	2.77095		0.473392	0.385018	0.158135	0.641507	0.177747	0.340214	0.109751	0.299763	1.69445	0.0485954	-0.0435126	1.96274	2.2525	2.45045	0.506874	0.654214	0.0485954	0.654214	-0.00948041	-0.197614	0.288255	-0.198615	-0.242455	0.900517	1.48012
273	3.4168	3.52215	3.36359	4.52522	3.36359	4.52522	3.34187	3.4168	0.815639	4.91004	3.87639	3.4168	6.71088	6.85965	4.63668	7.05111	3.50155	6.60085	0.785576	3.3156	2.43009	3.3156	3.3156		0.442485	0.414346	0.166063	0.571254	0.0634014	0.29094	0.146299	0.19825	1.72899	0.0310254	-0.0498506	2.07814	2.35035	2.43256	0.594363	0.704918	0.0310254	0.704918	0.0592876	-0.129511	0.270748	-0.14592	-0.286983	0.970255	1.43084
274	3.53286	3.50157	3.42326	4.28865	3.42326	4.28865	3.04178	3.53286	0.880898	5.22753	3.92304	3.53286	6.63554	6.98595	4.85944	7.0664	3.46357	6.03598	0.73042	3.57832	2.68523	3.57832	3.57832		0.431169	0.432647	0.169302	0.705342	-0.162345	0.350476	0.174404	0.311686	1.80882	-0.0269151	-0.0567126	1.90223	2.31329	2.4875	0.454185	0.75034	-0.0269151	0.75034	0.0242395	-0.141867	0.249391	-0.189609	-0.318133	0.956209	1.41838
275	3.47568	3.57144	3.37461	4.52212	3.37461	4.52212	3.33869	3.47568	0.804788	5.1265	4.00407	3.47568	7.12441	6.29904	4.66475	7.00627	3.44591	6.08519	0.845361	2.28499	2.63432	2.28499	2.28499		0.538039	0.427318	0.171877	0.795654	0.0196759	0.324484	0.149956	0.273056	1.63433	0.0594433	0.00939594	1.99696	2.38508	2.55574	0.540956	0.749137	0.0594433	0.749137	-0.0443209	-0.121465	0.238901	-0.265929	-0.352149	0.815694	1.42333
276	3.42361	3.37835	3.4592	4.36602	3.4592	4.36602	3.14312	3.42361	0.869876	5.1486	3.91877	3.42361	6.59338	6.76691	4.69367	7.25041	3.42859	6.25244	0.876733	2.21147	2.5647	2.21147	2.21147		0.407517	0.4079	0.14747	0.720839	-0.0740539	0.320501	0.174864	0.219305	1.60482	0.00299686	0.0282318	2.20774	2.33905	2.58357	0.453466	0.718391	0.00299686	0.718391	-0.00997174	-0.137913	0.254955	-0.222411	-0.327973	0.985588	1.49287
277	3.50251	3.46889	3.40533	4.51469	3.40533	4.51469	3.23751	3.50251	0.875764	4.88769	3.95954	3.50251	6.78881	6.78305	4.79771	6.76947	3.50192	6.14415	0.841973	2.61494	2.69557	2.61494	2.61494		0.474202	0.446477	0.228234	0.690391	-0.0275348	0.339076	0.169544	0.336084	1.65482	-0.0217264	-0.00424895	2.08436	2.5251	2.74081	0.499892	0.728853	-0.0217264	0.728853	0.000807134	-0.161503	0.266603	-0.261162	-0.360508	1.00684	1.48383
278	3.4508	3.53121	3.42839	4.47466	3.42839	4.47466	3.04495	3.4508	0.895259	5.02459	3.89486	3.4508	6.37713	6.59441	4.48202	5.93186	3.46438	6.17014	0.775219	2.9916	2.35878	2.9916	2.9916		0.45808	0.426398	0.201496	0.578079	-0.0483899	0.301691	0.156252	0.222084	1.72181	0.00329929	0.0148638	2.25575	2.29679	2.66211	0.533108	0.77017	0.00329929	0.77017	0.0287757	-0.181422	0.278241	-0.218219	-0.329287	0.98616	1.49559
279	3.48534	3.50781	3.4632	4.33144	3.4632	4.33144	2.97081	3.48534	0.903576	5.15426	3.88853	3.48534	6.24506	6.27483	4.42866	6.61109	3.44818	5.65594	0.807021	2.89886	2.51744	2.89886	2.89886		0.464006	0.406567	0.164377	0.67054	-0.0317117	0.338062	0.106766	0.244359	1.77907	0.0396716	-0.0355531	2.26251	2.36636	2.74342	0.607268	0.705715	0.0396716	0.705715	0.0773273	-0.166624	0.315684	-0.268272	-0.370507	1.02793	1.45041
280	3.40307	3.5156	3.43475	4.51474	3.43475	4.51474	3.19106	3.40307	0.782641	5.12361	3.94681	3.40307	6.41805	6.56409	4.58868	6.27864	3.41179	5.85279	0.823137	2.39006	3.03871	2.39006	2.39006		0.475589	0.420157	0.191587	0.800657	0.051771	0.31662	0.156146	0.245929	1.70164	0.00525377	-0.00131233	2.07552	2.41745	2.9744	0.533389	0.665128	0.00525377	0.665128	0.0264452	-0.182078	0.314073	-0.251135	-0.353368	0.99907	1.4404
281	3.58827	3.52812	3.44922	4.6073	3.44922	4.6073	3.19554	3.58827	0.886513	5.31523	4.03743	3.58827	6.5153	6.39224	4.82884	6.95482	3.45802	6.16742	0.780103	2.92041	2.19719	2.92041	2.92041		0.533999	0.415859	0.208018	0.697298	0.059795	0.293631	0.169351	0.159396	1.83667	0.0341569	-0.0315882	2.28254	2.09818	2.85097	0.492984	0.699433	0.0341569	0.699433	0.043807	-0.155243	0.260665	-0.377105	-0.381921	0.92781	1.45191
282	3.55281	3.51919	3.44954	4.47967	3.44954	4.47967	3.35916	3.55281	0.870133	4.99612	3.90106	3.55281	6.4808	7.26102	4.68698	6.82663	3.42747	6.23467	0.835244	2.39894	2.70867	2.39894	2.39894		0.471535	0.378494	0.144934	0.678979	-0.0453851	0.338881	0.101562	0.300717	1.79354	0.0582121	-0.0648896	2.04314	2.42971	2.77335	0.462874	0.796541	0.0582121	0.796541	0.0758191	-0.247065	0.217159	-0.365413	-0.335921	0.891392	1.41101
283	3.60214	3.46527	3.36942	4.62909	3.36942	4.62909	3.25842	3.60214	0.820431	5.14965	3.88975	3.60214	6.45219	6.38779	4.74801	7.10408	3.47014	6.23757	0.846793	2.82275	2.68839	2.82275	2.82275		0.468008	0.387812	0.200864	0.732528	0.0239134	0.342384	0.0949018	0.288241	1.71412	0.0152349	0.00723056	2.17021	2.17907	2.84689	0.552629	0.746068	0.0152349	0.746068	0.0213494	-0.145102	0.298189	-0.352469	-0.409114	0.980609	1.55929
284	3.47752	3.50045	3.49259	4.49581	3.49259	4.49581	3.13732	3.47752	0.78656	4.92303	3.90155	3.47752	6.33559	6.07415	4.61805	6.38648	3.44365	6.3916	0.770669	2.13855	2.29254	2.13855	2.13855		0.465458	0.442936	0.157606	0.680802	-0.10071	0.291864	0.140735	0.312722	1.74511	0.00484076	0.00816988	2.10556	2.39933	2.89443	0.500197	0.790991	0.00484076	0.790991	0.0240674	-0.186087	0.179341	-0.382513	-0.386007	0.912351	1.45345
285	3.60611	3.44349	3.31792	4.70237	3.31792	4.70237	2.96911	3.60611	0.741359	5.09462	3.95419	3.60611	6.16501	6.30571	4.60498	6.7899	3.47483	6.11777	0.805605	2.62028	2.76317	2.62028	2.62028		0.467033	0.40704	0.195509	0.727769	-0.00241191	0.343879	0.144134	0.208182	1.71297	-0.0522658	0.0436763	2.26385	2.28702	3.04715	0.569018	0.818669	-0.0522658	0.818669	0.0369338	-0.241607	0.26204	-0.360624	-0.389078	0.865169	1.5193
286	3.42101	3.49448	3.30682	4.44623	3.30682	4.44623	3.25661	3.42101	0.905562	5.17528	3.88004	3.42101	6.25468	6.58096	4.67555	6.65358	3.43046	6.01555	0.756924	2.35696	2.32936	2.35696	2.35696		0.539434	0.40955	0.225811	0.735755	-0.0277149	0.371626	0.137722	0.270881	1.67236	-0.00531533	0.0090301	2.38819	2.26888	3.05079	0.480689	0.65969	-0.00531533	0.65969	-0.0220367	-0.171062	0.257521	-0.450081	-0.410024	0.937462	1.50778
287	3.47254	3.49621	3.48173	4.61001	3.48173	4.61001	3.06536	3.47254	0.857503	5.4687	3.97717	3.47254	6.20438	6.17894	4.67084	6.89406	3.49651	6.41355	0.808262	3.19511	2.72738	3.19511	3.19511		0.437709	0.431392	0.102842	0.597013	0.174111	0.332375	0.124987	0.28146	1.55509	0.0394019	0.0423612	2.32328	2.30612	2.98217	0.662526	0.604406	0.0394019	0.604406	-0.0247337	-0.228058	0.329127	-0.476279	-0.449922	0.948718	1.42602
288	3.53828	3.45617	3.35895	4.43595	3.35895	4.43595	3.10164	3.53828	0.817984	4.96489	3.98148	3.53828	6.34083	6.49703	4.43829	6.34061	3.46526	6.20051	0.832094	3.42671	2.99977	3.42671	3.42671		0.451706	0.443417	0.199373	0.645745	0.0562492	0.341624	0.134181	0.242389	1.59392	0.021569	0.0379909	2.1501	2.41398	2.9947	0.518292	0.673321	0.021569	0.673321	0.0313611	-0.178516	0.20089	-0.391563	-0.3923	1.00127	1.41106
289	3.59282	3.50811	3.4046	4.56476	3.4046	4.56476	3.35007	3.59282	0.854251	5.07118	3.96206	3.59282	6.42583	6.6125	4.58338	6.7925	3.46127	6.03351	0.765276	2.04753	2.05039	2.04753	2.04753		0.515471	0.411948	0.199489	0.745959	0.0636118	0.332499	0.101962	0.222249	1.61604	-0.013509	0.00506517	2.22606	2.4111	2.96638	0.539542	0.689508	-0.013509	0.689508	0.0456803	-0.157066	0.344488	-0.459143	-0.416104	1.01776	1.44578
290	3.47842	3.50612	3.41782	4.61709	3.41782	4.61709	3.13158	3.47842	0.870954	5.02187	3.99452	3.47842	6.66382	6.34597	4.45856	6.52463	3.5085	6.15186	0.826048	1.40238	2.37407	1.40238	1.40238		0.429572	0.472153	0.211824	0.698051	0.0434172	0.36189	0.102497	0.232837	1.70231	0.0190096	-0.0122579	2.25753	2.2914	3.01689	0.496418	0.64061	0.0190096	0.64061	0.00476267	-0.150697	0.295759	-0.372406	-0.430234	0.960982	1.47659
291	3.48634	3.47307	3.43441	4.50013	3.43441	4.50013	3.1116	3.48634	0.820071	5.06795	3.93908	3.48634	6.345	6.02732	4.3405	6.80512	3.43612	6.01384	0.825889	3.69632	2.19871	3.69632	3.69632		0.485576	0.446082	0.215566	0.755827	-0.156094	0.330055	0.105707	0.312085	1.65611	0.017388	-0.0166777	2.26526	2.31749	3.07503	0.662954	0.717622	0.017388	0.717622	0.042735	-0.197879	0.220838	-0.461554	-0.424115	0.949933	1.57566
292	3.56293	3.46151	3.39243	4.57671	3.39243	4.57671	3.21634	3.56293	0.814184	5.18186	3.88162	3.56293	6.12793	6.71368	4.44236	6.71791	3.45847	5.96178	0.763685	3.07357	2.55861	3.07357	3.07357		0.522603	0.412284	0.199829	0.639001	-0.00322306	0.357938	0.146515	0.253952	1.63092	0.0354196	-0.0341194	2.2155	2.33722	3.35301	0.623497	0.724256	0.0354196	0.724256	0.0661057	-0.201706	0.271111	-0.469548	-0.418867	0.984161	1.5355
293	3.47872	3.5242	3.34736	4.53682	3.34736	4.53682	2.84424	3.47872	0.832361	5.01489	4.01259	3.47872	6.29745	6.3876	4.3519	6.81235	3.45367	6.18184	0.790301	3.21855	2.41214	3.21855	3.21855		0.483617	0.415722	0.177547	0.687128	-0.03646	0.297524	0.152171	0.273354	1.75762	-0.0559931	-0.0218588	2.22723	2.32947	3.05407	0.518718	0.731725	-0.0559931	0.731725	0.0409996	-0.218298	0.313505	-0.526479	-0.45669	0.92934	1.52918
294	3.51523	3.48872	3.42352	4.48592	3.42352	4.48592	2.9933	3.51523	0.860343	5.30658	3.87805	3.51523	6.28922	5.89645	4.48928	6.72444	3.47794	6.24168	0.826827	3.11184	2.4668	3.11184	3.11184		0.484362	0.436412	0.186496	0.597118	0.0381279	0.35292	0.174694	0.191889	1.72383	0.0216006	-0.0310542	2.37211	2.45999	3.12562	0.496017	0.799748	0.0216006	0.799748	0.0619084	-0.21747	0.280432	-0.500742	-0.403209	1.06258	1.48356
295	3.47532	3.53655	3.38288	4.68442	3.38288	4.68442	3.41995	3.47532	0.836896	5.31368	3.93519	3.47532	6.34099	6.36683	4.44811	7.03817	3.52433	6.16945	0.780278	2.05744	2.42378	2.05744	2.05744		0.516165	0.407487	0.212729	0.643481	-0.0999282	0.334078	0.178015	0.219048	1.59073	-0.0207887	0.0286372	2.35163	2.25461	3.0912	0.502061	0.709116	-0.0207887	0.709116	0.0778317	-0.193013	0.328458	-0.532555	-0.409557	0.966431	1.60494
296	3.48851	3.42937	3.46519	4.40851	3.46519	4.40851	3.29103	3.48851	0.843279	5.24601	3.93316	3.48851	6.23667	6.50724	4.51366	6.77169	3.51985	6.01396	0.842291	3.19735	2.21411	3.19735	3.19735		0.528457	0.470227	0.172099	0.679153	0.00819698	0.343632	0.161922	0.242913	1.76869	-0.00561775	0.0298237	2.25625	2.29602	3.17966	0.548607	0.658345	-0.00561775	0.658345	0.0161708	-0.233552	0.199311	-0.462243	-0.463941	1.06994	1.57103
297	3.40614	3.5226	3.43017	4.55473	3.43017	4.55473	3.04413	3.40614	0.82969	4.91633	3.91822	3.40614	6.24301	6.51669	4.24524	6.65523	3.47376	6.07501	0.765674	2.77328	2.80886	2.77328	2.77328		0.49424	0.441474	0.19011	0.687651	-0.0029824	0.332369	0.185716	0.204653	1.59077	-0.0735394	-0.0227981	2.30204	2.31988	3.05036	0.581252	0.739119	-0.0735394	0.739119	0.0193854	-0.238218	0.300778	-0.587937	-0.467068	0.930359	1.49839
298	3.68347	3.48171	3.38848	4.59599	3.38848	4.59599	3.12331	3.68347	0.834637	5.07095	3.96873	3.68347	6.09952	6.39818	4.41411	6.25428	3.42768	6.21537	0.803187	2.00892	2.63427	2.00892	2.00892		0.483755	0.387107	0.224724	0.867405	0.00615312	0.302873	0.105412	0.375442	1.77754	0.00688326	0.063936	2.41207	2.32166	3.04275	0.561695	0.81513	0.00688326	0.81513	0.0468837	-0.178352	0.254932	-0.522782	-0.467282	0.942639	1.50054
299	3.42031	3.52663	3.43219	4.6132	3.43219	4.6132	3.05425	3.42031	0.856681	4.79866	3.87146	3.42031	6.40684	6.11607	4.39494	7.04242	3.43884	6.1857	0.862479	2.0159	2.0046	2.0159	2.0159		0.460298	0.43997	0.174228	0.835192	0.0500587	0.362507	0.124214	0.315256	1.83369	-0.00754064	0.0280637	2.27018	2.19376	3.16882	0.532975	0.719272	-0.00754064	0.719272	0.0975923	-0.188648	0.258747	-0.577726	-0.436378	0.867724	1.4211
[truncated: 281 more columns]

## Sheet: Panel D
Replicate	Treatment	Peak
WT	Baseline	0.0729355
WT	Baseline	0.130721
WT	Baseline	0.0439458
WT	Baseline	0.0420545
WT	Baseline	0.0801896
WT	Baseline	0.0472181
WT	Baseline	0.0569066
WT	Baseline	0.0473509
WT	Baseline	0.0558831
WT	Baseline	0.0390163
WT	Baseline	0.214678
WT	Baseline	0.0268663
WT	Baseline	0.118779
WT	Baseline	0.0710376
WT	Baseline	0.133086
WT	Baseline	0.0974425
WT	Baseline	0.0476078
WT	Baseline	0.144216
WT	Baseline	0.0650534
WT	Baseline	0.053739
WT	Baseline	0.0683814
WT	Baseline	0.277784
WT	Baseline	0.658344
WT	Baseline	0.0920777
WT	Baseline	0.189862
WT	Baseline	0.0657984
WT	Baseline	0.100407
WT	Baseline	0.131127
WT	Baseline	0.133959
WT	Baseline	0.0849934
WT	Baseline	0.0354205
WT	Baseline	0.0929499
WT	Baseline	0.138282
WT	Baseline	0.166894
WT	Baseline	0.138282
WT	Baseline	0.166894
WT	Baseline	0.171297
WT	Baseline	0.133959
WT	Baseline	0.0454985
WT	Baseline	0.0586379
WT	Baseline	0.157563
WT	Baseline	0.186617
WT	Baseline	0.133959
WT	Baseline	0.111115
WT	Baseline	0.199487
WT	Baseline	0.124235
WT	Baseline	0.034906
WT	Baseline	0.168723
WT	Baseline	0.095274
WT	Baseline	0.168721
WT	Baseline	0.187579
WT	Baseline	0.100179
WT	Baseline	0.0975187
WT	Baseline	0.0444656
WT	Baseline	0.141626
WT	Baseline	0.0646112
WT	Baseline	0.110501
WT	Baseline	0.0956262
WT	Baseline	0.165676
WT	Baseline	0.147412
WT	Baseline	1.03539
WT	Baseline	0.819255
WT	Baseline	0.554535
WT	Baseline	0.654519
WT	Baseline	0.358179
WT	Baseline	0.664456
WT	Baseline	0.664456
WT	Baseline	0.37232
WT	Baseline	0.383807
WT	Baseline	0.385747
WT	Baseline	0.929618
WT	Baseline	0.441925
WT	Baseline	0.607807
WT	Baseline	0.223765
WT	Baseline	0.31861
WT	Baseline	0.37829
WT	Baseline	0.532286
WT	Baseline	0.302963
WT	Baseline	0.230098
WT	Baseline	0.43441
WT	Baseline	0.284021
WT	Baseline	0.156114
WT	Baseline	0.145355
WT	Baseline	0.519143
WT	Baseline	0.346448
WT	Baseline	0.610428
WT	Baseline	0.519143
WT	Baseline	0.346448
WT	Baseline	0.610428
WT	Baseline	0.374805
WT	Baseline	0.819255
WT	Baseline	0.554535
WT	Baseline	0.554535
WT	Baseline	0.358179
WT	Baseline	1.03539
WT	Baseline	1.03539
WT	Baseline	0.383807
WT	Baseline	0.654519
WT	Baseline	0.374689
WT	Baseline	0.664456
WT	Baseline	0.664456
WT	Baseline	0.929618
WT	Baseline	0.667342
WT	Baseline	0.607807
WT	Baseline	0.37232
WT	Baseline	0.223765
WT	Baseline	0.385747
WT	Baseline	0.37829
WT	Baseline	0.37829
WT	Baseline	0.441925
WT	Baseline	0.441925
WT	Baseline	0.230098
WT	Baseline	0.32053
WT	Baseline	0.19741
WT	Baseline	0.532286
WT	Baseline	0.532286
WT	Baseline	0.302963
WT	Baseline	0.43441
WT	Baseline	0.284021
WT	Baseline	0.610428
WT	Baseline	0.156114
WT	Baseline	0.519143
WT	Baseline	0.346448
WT	Baseline	0.610428
WT	KCl	1.64197
WT	KCl	0.69883
WT	KCl	0.369772
WT	KCl	0.384838
WT	KCl	0.330587
WT	KCl	0.290235
WT	KCl	0.206214
WT	KCl	0.124597
WT	KCl	0.260808
WT	KCl	0.156932
WT	KCl	0.314028
WT	KCl	0.0935974
WT	KCl	0.262476
WT	KCl	0.51769
WT	KCl	0.916073
WT	KCl	0.255945
WT	KCl	0.234489
WT	KCl	0.170273
WT	KCl	0.447183
WT	KCl	0.385211
WT	KCl	0.484788
WT	KCl	4.54992
WT	KCl	0.938053
WT	KCl	4.7915
WT	KCl	3.95327
WT	KCl	0.742186
WT	KCl	1.39991
WT	KCl	1.45128
WT	KCl	4.42958
WT	KCl	0.482475
WT	KCl	0.1962
WT	KCl	3.58195
WT	KCl	3.49259
WT	KCl	4.7336
WT	KCl	3.49259
WT	KCl	4.7336
WT	KCl	4.96083
WT	KCl	4.42958
WT	KCl	0.399448
WT	KCl	1.64488
WT	KCl	6.02095
WT	KCl	4.29919
WT	KCl	4.42958
WT	KCl	8.74641
WT	KCl	8.63542
WT	KCl	7.11148
WT	KCl	0.23881
WT	KCl	8.92646
WT	KCl	3.6009
WT	KCl	6.60085
WT	KCl	1.29736
WT	KCl	1.61103
WT	KCl	1.16383
WT	KCl	0.440908
WT	KCl	0.2116
WT	KCl	0.348792
WT	KCl	0.2951
WT	KCl	0.298356
WT	KCl	0.380756
WT	KCl	0.364265
WT	KCl	12.9366
WT	KCl	7.84886
WT	KCl	6.46265
WT	KCl	1.23851
WT	KCl	1.59284
WT	KCl	11.2548
WT	KCl	11.2548
WT	KCl	2.55439
WT	KCl	2.21626
WT	KCl	1.03881
WT	KCl	7.76341
WT	KCl	3.72442
WT	KCl	3.33875
WT	KCl	1.23594
WT	KCl	0.873734
WT	KCl	4.14347
WT	KCl	2.84493
WT	KCl	2.39796
WT	KCl	0.851655
WT	KCl	1.1041
WT	KCl	1.18173
WT	KCl	2.19198
WT	KCl	0.751606
WT	KCl	4.61925
WT	KCl	2.00008
WT	KCl	1.85651
WT	KCl	4.61925
WT	KCl	2.00008
WT	KCl	1.85651
WT	KCl	1.02693
WT	KCl	7.84886
WT	KCl	6.46265
WT	KCl	6.46265
WT	KCl	1.59284
WT	KCl	12.9366
WT	KCl	12.9366
WT	KCl	2.21626
WT	KCl	1.23851
WT	KCl	0.400547
WT	KCl	11.2548
WT	KCl	11.2548
WT	KCl	7.76341
WT	KCl	6.28305
WT	KCl	3.33875
WT	KCl	2.55439
WT	KCl	1.23594
WT	KCl	1.03881
WT	KCl	4.14347
WT	KCl	4.14347
WT	KCl	3.72442
WT	KCl	3.72442
WT	KCl	0.851655
WT	KCl	1.23757
WT	KCl	1.08543
WT	KCl	2.84493
WT	KCl	2.84493
WT	KCl	2.39796
WT	KCl	1.1041
WT	KCl	1.18173
WT	KCl	1.85651
WT	KCl	2.19198
WT	KCl	4.61925
WT	KCl	2.00008
WT	KCl	1.85651
E180A	Baseline	0.0496182
E180A	Baseline	0.245346
E180A	Baseline	0.189439
E180A	Baseline	0.0856787
E180A	Baseline	0.137869
E180A	Baseline	0.117149
E180A	Baseline	0.142835
E180A	Baseline	0.37024
E180A	Baseline	0.195426
E180A	Baseline	0.0647831
E180A	Baseline	0.0748025
E180A	Baseline	0.101245
E180A	Baseline	0.198384
E180A	Baseline	0.152815
E180A	Baseline	0.0903371
E180A	Baseline	0.0874729
E180A	Baseline	0.0647831
E180A	Baseline	0.0874729
E180A	Baseline	0.128056
E180A	Baseline	0.0952918
E180A	Baseline	0.117068
E180A	Baseline	0.106465
E180A	Baseline	0.0634569
E180A	Baseline	0.0869548
E180A	Baseline	0.109171
E180A	Baseline	0.0521264
E180A	Baseline	0.0574753
E180A	Baseline	0.076056
E180A	Baseline	0.0164268
E180A	Baseline	0.0521264
E180A	Baseline	0.0630523
E180A	Baseline	0.123422
E180A	Baseline	0.0787758
E180A	Baseline	0.0521264
E180A	Baseline	0.0648344
E180A	Baseline	0.0507844
E180A	Baseline	0.0431148
E180A	Baseline	0.0238034
E180A	Baseline	0.0512686
E180A	Baseline	0.200312
E180A	Baseline	0.226317
E180A	Baseline	0.186341
E180A	Baseline	0.208001
E180A	Baseline	0.253132
E180A	Baseline	0.174082
E180A	Baseline	0.286722
E180A	Baseline	0.204859
E180A	Baseline	0.186006
E180A	Baseline	0.165185
E180A	Baseline	0.199772
E180A	Baseline	0.123357
E180A	Baseline	0.160379
E180A	Baseline	0.407733
E180A	Baseline	0.110998
E180A	Baseline	0.307092
E180A	Baseline	0.407733
E180A	Baseline	0.189979
E180A	Baseline	0.216792
E180A	Baseline	0.132729
E180A	Baseline	0.172701
E180A	Baseline	0.142023
E180A	Baseline	0.152927
E180A	Baseline	0.159088
E180A	Baseline	0.187627
E180A	Baseline	0.312759
E180A	Baseline	0.199426
E180A	Baseline	0.0870845
E180A	Baseline	0.163385
E180A	Baseline	0.0609504
E180A	Baseline	0.043058
E180A	Baseline	0.076568
E180A	Baseline	0.226649
E180A	Baseline	0.212183
E180A	Baseline	0.195528
E180A	Baseline	0.464629
E180A	Baseline	0.489127
E180A	Baseline	0.0531584
E180A	Baseline	0.312759
E180A	Baseline	0.199426
E180A	Baseline	0.0460866
E180A	Baseline	0.0276358
E180A	Baseline	0.0937244
E180A	Baseline	0.0675927
E180A	Baseline	0.0902475
E180A	Baseline	0.102344
E180A	Baseline	0.0733828
E180A	Baseline	0.0902475
E180A	Baseline	0.0530513
E180A	Baseline	0.0902475
E180A	Baseline	0.102344
E180A	Baseline	0.066182
E180A	Baseline	0.139525
E180A	Baseline	0.109976
E180A	Baseline	0.0884408
E180A	Baseline	0.101624
E180A	Baseline	0.155183
E180A	Baseline	0.146338
E180A	Baseline	0.129492
E180A	Baseline	0.105168
E180A	Baseline	0.0884424
E180A	Baseline	0.0736303
E180A	Baseline	0.122841
E180A	Baseline	0.0845694
E180A	Baseline	0.0972541
E180A	Baseline	0.0872894
E180A	Baseline	0.0640003
E180A	Baseline	0.0990701
E180A	Baseline	0.0902475
E180A	Baseline	0.0534245
E180A	Baseline	0.0292476
E180A	Baseline	0.0545212
E180A	Baseline	0.0621926
E180A	Baseline	0.0418247
E180A	Baseline	0.0277659
E180A	Baseline	0.0420714
E180A	Baseline	0.0442293
E180A	Baseline	0.0325881
E180A	Baseline	0.0378175
E180A	Baseline	0.0390229
E180A	Baseline	0.0286838
E180A	Baseline	0.0653421
E180A	Baseline	0.0686291
E180A	Baseline	0.0813161
E180A	Baseline	0.0449095
E180A	Baseline	0.0860236
E180A	Baseline	0.0973391
E180A	Baseline	0.0882717
E180A	Baseline	0.112493
E180A	Baseline	0.0624376
E180A	Baseline	0.0949388
E180A	Baseline	0.260475
E180A	Baseline	0.15501
E180A	Baseline	0.203313
E180A	Baseline	0.136472
E180A	Baseline	0.0651235
E180A	Baseline	0.0917394
E180A	Baseline	0.0669101
E180A	Baseline	0.0398101
E180A	Baseline	0.0719876
E180A	Baseline	0.0532417
E180A	Baseline	0.152919
E180A	Baseline	0.0847699
E180A	Baseline	0.111317
E180A	Baseline	0.100751
E180A	Baseline	0.117594
E180A	Baseline	0.0234966
E180A	Baseline	0.0556774
E180A	Baseline	0.0402346
E180A	Baseline	0.0876933
E180A	Baseline	0.0663757
E180A	Baseline	0.0857229
E180A	Baseline	0.103917
E180A	Baseline	0.178011
E180A	Baseline	0.114701
E180A	Baseline	0.122557
E180A	Baseline	0.199686
E180A	Baseline	0.0764943
E180A	Baseline	0.0850029
E180A	Baseline	0.117694
E180A	Baseline	0.037158
E180A	Baseline	0.143435
E180A	Baseline	0.213416
E180A	Baseline	0.081927
E180A	Baseline	0.135047
E180A	Baseline	0.126176
E180A	Baseline	0.107305
E180A	Baseline	0.128631
E180A	Baseline	0.0653525
E180A	Baseline	0.0858841
E180A	Baseline	0.0629276
E180A	Baseline	0.0986428
E180A	Baseline	0.0658896
E180A	Baseline	0.110609
E180A	Baseline	0.0905488
E180A	Baseline	0.126176
E180A	Baseline	0.0952663
E180A	Baseline	0.0980625
E180A	Baseline	0.271203
E180A	Baseline	0.0340219
E180A	Baseline	0.12471
E180A	Baseline	0.088527
E180A	Baseline	0.0713234
E180A	Baseline	0.0481435
E180A	Baseline	0.0425856
E180A	Baseline	0.0675838
E180A	Baseline	0.0630265
E180A	Baseline	0.0510324
E180A	Baseline	0.0871999
E180A	Baseline	0.0546402
E180A	Baseline	0.12732
E180A	Baseline	0.139837
E180A	Baseline	0.0925235
E180A	Baseline	0.0680746
E180A	Baseline	0.105898
E180A	Baseline	0.106913
E180A	Baseline	0.205868
E180A	Baseline	0.0871999
E180A	Baseline	0.0826492
E180A	Baseline	0.0747006
E180A	Baseline	0.0364433
E180A	Baseline	0.034384
E180A	Baseline	0.0490775
E180A	Baseline	0.0721483
E180A	Baseline	0.174776
E180A	Baseline	0.133948
E180A	Baseline	0.209392
E180A	Baseline	0.0729576
E180A	Baseline	0.102586
E180A	Baseline	0.259258
E180A	Baseline	0.247851
E180A	Baseline	0.084324
E180A	Baseline	0.188128
E180A	Baseline	0.0826492
E180A	Baseline	0.0826492
E180A	Baseline	0.185249
E180A	Baseline	0.189428
E180A	Baseline	0.111644
E180A	Baseline	0.126308
E180A	Baseline	0.152787
E180A	Baseline	0.16369
E180A	Baseline	0.0977112
E180A	Baseline	0.129383
E180A	Baseline	0.260902
E180A	KCl	0.57889
E180A	KCl	0.505779
E180A	KCl	0.228234
E180A	KCl	0.867405
E180A	KCl	0.248428
E180A	KCl	0.371626
E180A	KCl	0.418912
E180A	KCl	0.375442
E180A	KCl	1.83667
E180A	KCl	0.104462
E180A	KCl	0.129273
E180A	KCl	2.41207
E180A	KCl	2.5251
E180A	KCl	3.35301
E180A	KCl	0.662954
E180A	KCl	0.831809
E180A	KCl	0.104462
E180A	KCl	0.831809
E180A	KCl	0.760379
E180A	KCl	0.755903
E180A	KCl	0.344488
E180A	KCl	0.168726
E180A	KCl	0.121879
E180A	KCl	1.20426
E180A	KCl	1.60494
E180A	KCl	0.433795
E180A	KCl	0.890991
E180A	KCl	0.274107
E180A	KCl	0.0188564
E180A	KCl	0.433795
E180A	KCl	0.193999
E180A	KCl	0.11588
E180A	KCl	0.813817
E180A	KCl	0.433795
E180A	KCl	0.115147
E180A	KCl	0.0202686
E180A	KCl	0.435701
E180A	KCl	0.343511
E180A	KCl	0.114624
E180A	KCl	1.01163
E180A	KCl	0.842861
E180A	KCl	0.557131
E180A	KCl	0.465111
E180A	KCl	0.704576
E180A	KCl	0.54258
E180A	KCl	0.620476
E180A	KCl	0.634671
E180A	KCl	0.566323
E180A	KCl	0.509332
E180A	KCl	0.466836
E180A	KCl	0.395689
E180A	KCl	0.401784
E180A	KCl	0.919328
E180A	KCl	0.0772271
E180A	KCl	0.507576
E180A	KCl	0.919328
E180A	KCl	0.177343
E180A	KCl	0.392836
E180A	KCl	0.363208
E180A	KCl	0.479903
E180A	KCl	0.372768
E180A	KCl	0.494178
E180A	KCl	0.26812
E180A	KCl	0.191301
E180A	KCl	0.362762
E180A	KCl	0.081736
E180A	KCl	0.0586621
E180A	KCl	0.182153
E180A	KCl	0.0912503
E180A	KCl	0.0646804
E180A	KCl	0.137717
E180A	KCl	0.433243
E180A	KCl	0.568578
E180A	KCl	0.352266
E180A	KCl	1.07244
E180A	KCl	1.12314
E180A	KCl	0.0630319
E180A	KCl	0.362762
E180A	KCl	0.081736
E180A	KCl	0.120004
E180A	KCl	0.0551215
E180A	KCl	0.376961
E180A	KCl	0.18836
E180A	KCl	0.760152
E180A	KCl	0.546593
E180A	KCl	0.0446622
E180A	KCl	0.760152
E180A	KCl	0.037325
E180A	KCl	0.760152
E180A	KCl	0.546593
E180A	KCl	0.0001764
E180A	KCl	0.277196
E180A	KCl	0.2071
E180A	KCl	0.122459
E180A	KCl	0.154057
E180A	KCl	0.317535
E180A	KCl	0.283521
E180A	KCl	0.200104
E180A	KCl	0.164311
E180A	KCl	0.0225754
E180A	KCl	0.121224
E180A	KCl	0.0896542
E180A	KCl	0.0809293
E180A	KCl	0.226302
E180A	KCl	0.0375902
E180A	KCl	0.119336
E180A	KCl	0.108172
E180A	KCl	0.760152
E180A	KCl	0.412567
E180A	KCl	0.202097
E180A	KCl	0.523842
E180A	KCl	0.240907
E180A	KCl	0.20677
E180A	KCl	0.0756262
E180A	KCl	0.208761
E180A	KCl	0.0451142
E180A	KCl	0.0547637
E180A	KCl	0.0218964
E180A	KCl	0.0414953
E180A	KCl	0.315867
E180A	KCl	0.282125
E180A	KCl	0.703476
E180A	KCl	0.47573
E180A	KCl	0.598764
E180A	KCl	0.663759
E180A	KCl	0.517737
E180A	KCl	0.946737
E180A	KCl	1.77694
E180A	KCl	0.239315
E180A	KCl	1.83803
E180A	KCl	1.205
E180A	KCl	1.30333
E180A	KCl	1.26092
E180A	KCl	1.67052
E180A	KCl	-0.00692671
E180A	KCl	0.0197923
E180A	KCl	0.042124
E180A	KCl	0.00753118
E180A	KCl	-0.00558972
E180A	KCl	-0.00926322
E180A	KCl	0.12605
E180A	KCl	0.0467892
E180A	KCl	0.289083
E180A	KCl	1.56963
E180A	KCl	3.23423
E180A	KCl	0.162759
E180A	KCl	2.64851
E180A	KCl	0.04742
E180A	KCl	0.126423
E180A	KCl	0.22396
E180A	KCl	0.0824281
E180A	KCl	0.220229
E180A	KCl	0.343613
E180A	KCl	0.214207
E180A	KCl	0.209201
E180A	KCl	0.230981
E180A	KCl	0.0326522
E180A	KCl	0.580952
E180A	KCl	3.82255
E180A	KCl	0.216158
E180A	KCl	1.65914
E180A	KCl	3.72256
E180A	KCl	2.28733
E180A	KCl	4.49644
E180A	KCl	0.61247
E180A	KCl	0.525319
E180A	KCl	0.236606
E180A	KCl	0.207568
E180A	KCl	0.0201225
E180A	KCl	0.754249
E180A	KCl	0.0200776
E180A	KCl	1.00972
E180A	KCl	0.628952
E180A	KCl	0.166409
E180A	KCl	0.61247
E180A	KCl	0.534711
E180A	KCl	0.593727
E180A	KCl	1.8445
E180A	KCl	0.0618759
E180A	KCl	0.0273854
E180A	KCl	0.0328901
E180A	KCl	0.0500314
E180A	KCl	0.112188
E180A	KCl	0.125228
E180A	KCl	0.113145
E180A	KCl	0.0791769
E180A	KCl	0.0510324
E180A	KCl	0.395053
E180A	KCl	0.240722
E180A	KCl	3.60996
E180A	KCl	1.27164
E180A	KCl	3.31749
E180A	KCl	0.0128572
E180A	KCl	0.00533761
E180A	KCl	0.363093
E180A	KCl	2.85437
E180A	KCl	0.395053
E180A	KCl	0.568152
E180A	KCl	0.046338
E180A	KCl	0.0114383
E180A	KCl	0.010686
E180A	KCl	0.0433406
E180A	KCl	0.67706
E180A	KCl	0.371791
E180A	KCl	0.58903
E180A	KCl	0.530659
E180A	KCl	0.32079
E180A	KCl	0.250417
E180A	KCl	0.777392
E180A	KCl	0.949533
E180A	KCl	0.46016
E180A	KCl	0.242134
E180A	KCl	0.568152
E180A	KCl	0.568152
E180A	KCl	0.142385
E180A	KCl	0.298524
E180A	KCl	0.277802
E180A	KCl	0.331519
E180A	KCl	0.252582
E180A	KCl	0.585199
E180A	KCl	0.287048
E180A	KCl	0.32266
E180A	KCl	0.390251
E180A_NachBacOE	Baseline	0.417762
E180A_NachBacOE	Baseline	0.417762
E180A_NachBacOE	Baseline	0.250317
E180A_NachBacOE	Baseline	0.198907
E180A_NachBacOE	Baseline	0.202885
E180A_NachBacOE	Baseline	0.165554
E180A_NachBacOE	Baseline	0.15379
E180A_NachBacOE	Baseline	0.645432
E180A_NachBacOE	Baseline	0.132616
E180A_NachBacOE	Baseline	0.141708
E180A_NachBacOE	Baseline	0.123431
E180A_NachBacOE	Baseline	0.137677
E180A_NachBacOE	Baseline	0.170166
E180A_NachBacOE	Baseline	0.911899
E180A_NachBacOE	Baseline	0.151925
E180A_NachBacOE	Baseline	0.16567
E180A_NachBacOE	Baseline	0.151925
E180A_NachBacOE	Baseline	0.18241
E180A_NachBacOE	Baseline	0.233941
E180A_NachBacOE	Baseline	0.132295
E180A_NachBacOE	Baseline	0.156718
E180A_NachBacOE	Baseline	0.0543134
E180A_NachBacOE	Baseline	0.154562
E180A_NachBacOE	Baseline	0.275262
E180A_NachBacOE	Baseline	0.324499
E180A_NachBacOE	Baseline	0.0697537
E180A_NachBacOE	Baseline	0.0944777
E180A_NachBacOE	Baseline	0.073013
E180A_NachBacOE	Baseline	0.199139
E180A_NachBacOE	Baseline	0.179516
E180A_NachBacOE	Baseline	0.159609
E180A_NachBacOE	Baseline	0.823804
E180A_NachBacOE	Baseline	0.464177
E180A_NachBacOE	Baseline	0.257972
E180A_NachBacOE	Baseline	0.207767
E180A_NachBacOE	Baseline	0.198562
E180A_NachBacOE	Baseline	0.383045
E180A_NachBacOE	Baseline	0.318609
E180A_NachBacOE	Baseline	0.118566
E180A_NachBacOE	Baseline	0.143428
E180A_NachBacOE	Baseline	0.158542
E180A_NachBacOE	Baseline	0.106159
E180A_NachBacOE	Baseline	0.229514
E180A_NachBacOE	Baseline	0.0843707
E180A_NachBacOE	Baseline	0.476547
E180A_NachBacOE	Baseline	0.434236
E180A_NachBacOE	Baseline	0.20886
E180A_NachBacOE	Baseline	0.206833
E180A_NachBacOE	Baseline	0.106128
E180A_NachBacOE	Baseline	0.154636
E180A_NachBacOE	Baseline	0.143557
E180A_NachBacOE	Baseline	0.145297
E180A_NachBacOE	Baseline	0.678159
E180A_NachBacOE	Baseline	0.50729
E180A_NachBacOE	Baseline	0.863211
E180A_NachBacOE	Baseline	0.61417
E180A_NachBacOE	Baseline	0.298051
E180A_NachBacOE	Baseline	0.942296
E180A_NachBacOE	Baseline	0.72797
E180A_NachBacOE	Baseline	0.408747
E180A_NachBacOE	Baseline	0.288696
E180A_NachBacOE	Baseline	0.592253
E180A_NachBacOE	Baseline	0.21511
E180A_NachBacOE	Baseline	0.230687
E180A_NachBacOE	Baseline	0.294073
E180A_NachBacOE	Baseline	0.392149
E180A_NachBacOE	Baseline	0.911288
E180A_NachBacOE	Baseline	0.159972
E180A_NachBacOE	Baseline	0.040147
E180A_NachBacOE	Baseline	0.0306432
E180A_NachBacOE	Baseline	0.164981
E180A_NachBacOE	Baseline	0.101159
E180A_NachBacOE	Baseline	0.0874446
E180A_NachBacOE	Baseline	0.148302
E180A_NachBacOE	Baseline	0.154682
E180A_NachBacOE	Baseline	0.104596
E180A_NachBacOE	Baseline	0.0707603
E180A_NachBacOE	Baseline	0.0926698
E180A_NachBacOE	Baseline	0.0192129
E180A_NachBacOE	Baseline	0.0222959
E180A_NachBacOE	Baseline	0.0516528
E180A_NachBacOE	Baseline	0.0543746
E180A_NachBacOE	Baseline	0.0609622
E180A_NachBacOE	KCl	6.0495
E180A_NachBacOE	KCl	6.0495
E180A_NachBacOE	KCl	1.93412
E180A_NachBacOE	KCl	1.3868
E180A_NachBacOE	KCl	6.91347
E180A_NachBacOE	KCl	4.14691
E180A_NachBacOE	KCl	3.89124
E180A_NachBacOE	KCl	1.90933
E180A_NachBacOE	KCl	3.59264
E180A_NachBacOE	KCl	3.34911
E180A_NachBacOE	KCl	3.19999
E180A_NachBacOE	KCl	4.70802
E180A_NachBacOE	KCl	4.10916
E180A_NachBacOE	KCl	2.71098
E180A_NachBacOE	KCl	2.38751
E180A_NachBacOE	KCl	1.85325
E180A_NachBacOE	KCl	2.38751
E180A_NachBacOE	KCl	1.13604
E180A_NachBacOE	KCl	2.97233
E180A_NachBacOE	KCl	4.81235
E180A_NachBacOE	KCl	1.95952
E180A_NachBacOE	KCl	1.65587
E180A_NachBacOE	KCl	1.36608
E180A_NachBacOE	KCl	0.597817
E180A_NachBacOE	KCl	1.31186
E180A_NachBacOE	KCl	2.33244
E180A_NachBacOE	KCl	3.18388
E180A_NachBacOE	KCl	5.00431
E180A_NachBacOE	KCl	20.0731
E180A_NachBacOE	KCl	6.50577
E180A_NachBacOE	KCl	9.85682
E180A_NachBacOE	KCl	7.92872
E180A_NachBacOE	KCl	8.48226
E180A_NachBacOE	KCl	3.789
E180A_NachBacOE	KCl	3.70935
E180A_NachBacOE	KCl	6.14293
E180A_NachBacOE	KCl	4.3142
E180A_NachBacOE	KCl	2.67136
E180A_NachBacOE	KCl	0.82477
E180A_NachBacOE	KCl	2.88307
E180A_NachBacOE	KCl	2.69521
E180A_NachBacOE	KCl	2.59687
E180A_NachBacOE	KCl	2.68533
E180A_NachBacOE	KCl	1.00823
E180A_NachBacOE	KCl	17.8861
E180A_NachBacOE	KCl	9.49794
E180A_NachBacOE	KCl	3.87378
E180A_NachBacOE	KCl	9.6346
E180A_NachBacOE	KCl	0.290423
E180A_NachBacOE	KCl	3.81334
E180A_NachBacOE	KCl	1.31677
E180A_NachBacOE	KCl	0.480263
E180A_NachBacOE	KCl	5.81015
E180A_NachBacOE	KCl	3.52366
E180A_NachBacOE	KCl	1.60117
E180A_NachBacOE	KCl	1.19629
E180A_NachBacOE	KCl	9.45039
E180A_NachBacOE	KCl	1.37712
E180A_NachBacOE	KCl	3.28996
E180A_NachBacOE	KCl	5.58997
E180A_NachBacOE	KCl	6.83549
E180A_NachBacOE	KCl	7.26388
E180A_NachBacOE	KCl	6.71773
E180A_NachBacOE	KCl	5.06118
E180A_NachBacOE	KCl	6.07063
E180A_NachBacOE	KCl	6.56872
E180A_NachBacOE	KCl	4.8165
E180A_NachBacOE	KCl	2.12412
E180A_NachBacOE	KCl	0.591042
E180A_NachBacOE	KCl	0.487964
E180A_NachBacOE	KCl	1.86317
E180A_NachBacOE	KCl	0.459643
E180A_NachBacOE	KCl	1.99337
E180A_NachBacOE	KCl	0.84603
E180A_NachBacOE	KCl	0.919556
E180A_NachBacOE	KCl	0.916324
E180A_NachBacOE	KCl	0.151501
E180A_NachBacOE	KCl	0.35321
E180A_NachBacOE	KCl	0.0903103
E180A_NachBacOE	KCl	0.0649497
E180A_NachBacOE	KCl	0.225197
E180A_NachBacOE	KCl	0.529366
E180A_NachBacOE	KCl	0.225559

## Sheet: Panel E
Chrimson/+; + ATR	THD'>E180A+ATR	THD'Chrimson>E180A; no ATR	THD'Chrimson>E180A; ATR + Light Stim (72-96 hrs APF)	THD'Chrimson>E180A; ATR + Light Stim (0-2 days post eclosion)
900	0	0	0	8
100	0	0	0	37
314	0	0	28	24
358	0	0	88	6
733	0	22	61	106
676	0	1	146	3
737	0	2	148	13
900	0	12	252	0
172	0	4	197	15
235	0	3	2	124
492	0	0	0	116
501	0	0	10	139
735	0	0	12	303
900	0	0	10	343
277	0	0	1	0
303	0	0	72	8
408	0	0		10
415	0	10		0
395	0	22		19
572	0	0		166
540	0	0		103
575	0	0		3
584	0	0		211
596	0			73
65
95
113
150
174
204
526
655
900
900
289
303
404
510
900
203
293
327
438
442
495
900
810
650
900
609
759

## Sheet: Panel F
Time	WT-1	WT-2	WT-3	WT-4	WT-5	WT-6	WT-7	WT-8	WT-9	WT-10	WT-11	WT-12	WT-13	WT-14	WT-15	WT-16	WT-17	WT-18	WT-19	WT-20	WT-21	WT-22	WT-23	WT-24	WT-25	WT-26	WT-27	WT-28	WT-29	WT-30	WT-31	WT-32	WT-33	WT-34	WT-35	WT-36	WT-37	WT-38	WT-39	WT-40	WT-41	WT-42	WT-43	WT-44	WT-45	WT-46	WT-47	WT-48	WT-49
1	-0.000551246	0.0274134	0.0480897	0.049688	-0.0427967	-0.0252722	0.0306745	0.0262533	-0.0271634	-0.0129614	0.0214436	-0.00549161	0.0288799	0.0391039	0.0271866	-0.0096672	0.034629	0.0865637	-0.0423027	0.0111517	-0.00141758	0.0865637	0.029951	-0.000551246	0.0274134	0.0480897	0.049688	-0.0427967	-0.0252722	0.0306745	0.0262533	-0.0271634	-0.0129614	0.0214436	-0.00549161	0.0288799	0.0391039	0.0271866	-0.0096672	0.034629	0.0865637	-0.0423027	0.0111517	-0.00141758	0.0865637	0.029951	0.0225749	0.0225749	0.0283189
2	-0.0132442	-0.0341356	0.0194519	0.0455047	-0.0212611	0.0325949	0.0337038	-0.00294288	0.0243916	0.1805	0.0726552	-0.0922283	-0.0124501	-0.00747643	0.030184	0.0249868	-0.0470681	-0.0368772	0.0173218	0.020277	-0.0476431	-0.0368772	-0.0597379	-0.0132442	-0.0341356	0.0194519	0.0455047	-0.0212611	0.0325949	0.0337038	-0.00294288	0.0243916	0.1805	0.0726552	-0.0922283	-0.0124501	-0.00747643	0.030184	0.0249868	-0.0470681	-0.0368772	0.0173218	0.020277	-0.0476431	-0.0368772	-0.0597379	0.00836646	0.00836646	0.0257201
3	0.010715	-0.012499	-0.00528393	-0.0233843	0.0314064	0.0895324	-0.0134337	-0.0773971	0.00496171	0.0852068	0.0277889	0.0138825	-0.0348419	-0.0285797	-0.0107116	0.0245993	0.055988	-0.018264	0.0597281	-0.0186895	0.00541258	-0.018264	0.0639392	0.010715	-0.012499	-0.00528393	-0.0233843	0.0314064	0.0895324	-0.0134337	-0.0773971	0.00496171	0.0852068	0.0277889	0.0138825	-0.0348419	-0.0285797	-0.0107116	0.0245993	0.055988	-0.018264	0.0597281	-0.0186895	0.00541258	-0.018264	0.0639392	0.00830273	0.00830273	0.0287112
4	0.00188317	0.0232341	0.0131175	0.0313792	0.0684876	0.0374845	-0.0180904	0.0249706	-0.00552734	-0.145881	-0.0116056	-0.0265384	-0.019252	-0.019127	0.000234176	0.00214286	-0.00168499	0.0438924	0.027493	-0.0289884	-0.0564388	0.0438924	-0.0163072	0.00188317	0.0232341	0.0131175	0.0313792	0.0684876	0.0374845	-0.0180904	0.0249706	-0.00552734	-0.145881	-0.0116056	-0.0265384	-0.019252	-0.019127	0.000234176	0.00214286	-0.00168499	0.0438924	0.027493	-0.0289884	-0.0564388	0.0438924	-0.0163072	-0.00319215	-0.00319215	0.00952741
5	-0.0454805	-0.00897268	-0.014557	-0.0239276	-0.0237671	0.116486	-0.0169849	0.0837468	-0.0347883	-0.0779253	-0.0075938	-0.0841084	0.0124259	-0.00248893	-0.00589238	-0.0324842	-0.0128824	-0.0305474	0.019422	0.0263464	-0.0352764	-0.0305474	-0.0188225	-0.0454805	-0.00897268	-0.014557	-0.0239276	-0.0237671	0.116486	-0.0169849	0.0837468	-0.0347883	-0.0779253	-0.0075938	-0.0841084	0.0124259	-0.00248893	-0.00589238	-0.0324842	-0.0128824	-0.0305474	0.019422	0.0263464	-0.0352764	-0.0305474	-0.0188225	-0.0138284	-0.0138284	-0.0168429
6	0.00777108	-0.0240704	0.0057367	-0.00127244	0.0873337	0.0466777	-0.0377545	-0.0262735	-0.0486834	0.0402824	-0.0130843	-0.101647	-0.00826154	-0.0153189	0.0193591	0.00951625	-0.0723542	-0.0818009	-0.0712821	-0.0439148	-0.0137933	-0.0818009	-0.07753	0.00777108	-0.0240704	0.0057367	-0.00127244	0.0873337	0.0466777	-0.0377545	-0.0262735	-0.0486834	0.0402824	-0.0130843	-0.101647	-0.00826154	-0.0153189	0.0193591	0.00951625	-0.0723542	-0.0818009	-0.0712821	-0.0439148	-0.0137933	-0.0818009	-0.07753	0.0155713	0.0155713	0.00935255
7	0.0474691	0.0451755	0.00244388	-0.0535368	0.032364	0.00780337	-0.0386314	-0.0587808	0.049266	-0.0130928	-0.0122982	0.0210767	-0.00247391	-0.0320004	0.00261815	0.00456164	0.0162319	0.0281428	-0.033855	0.0178882	-0.0251369	0.0281428	0.0483155	0.0474691	0.0451755	0.00244388	-0.0535368	0.032364	0.00780337	-0.0386314	-0.0587808	0.049266	-0.0130928	-0.0122982	0.0210767	-0.00247391	-0.0320004	0.00261815	0.00456164	0.0162319	0.0281428	-0.033855	0.0178882	-0.0251369	0.0281428	0.0483155	0.00221819	0.00221819	-0.0138787
8	-0.00871505	0.0240874	-0.0103424	-0.0148003	0.036011	-0.105769	0.030138	0.0160462	-0.0405037	-0.213574	-0.024446	0.176459	0.0501705	-0.00142267	0.0118226	0.0388013	-0.0101466	-0.00567719	-0.0115747	0.00125083	-0.0237231	-0.00567719	0.0185657	-0.00871505	0.0240874	-0.0103424	-0.0148003	0.036011	-0.105769	0.030138	0.0160462	-0.0405037	-0.213574	-0.024446	0.176459	0.0501705	-0.00142267	0.0118226	0.0388013	-0.0101466	-0.00567719	-0.0115747	0.00125083	-0.0237231	-0.00567719	0.0185657	0.000541087	0.000541087	-0.0123462
9	0.0212453	-0.0366084	-0.0157299	-0.067608	0.0160238	0.00289356	0.0249431	-0.096134	0.0532655	0.121272	-0.0300114	-0.0693465	-0.0617042	0.00997979	0.0359187	0.0174587	-0.00352141	0.0389773	0.0788861	-0.00211743	0.0152117	0.0389773	-0.0432295	0.0212453	-0.0366084	-0.0157299	-0.067608	0.0160238	0.00289356	0.0249431	-0.096134	0.0532655	0.121272	-0.0300114	-0.0693465	-0.0617042	0.00997979	0.0359187	0.0174587	-0.00352141	0.0389773	0.0788861	-0.00211743	0.0152117	0.0389773	-0.0432295	-0.0134829	-0.0134829	0.00605146
10	-0.00446897	-0.00600363	-0.0121154	-0.0220261	-0.0201201	0.194538	0.0108191	0.0898645	-0.055818	0.0570232	-0.0576013	0.0303009	-0.0260327	0.0825813	-0.0109533	-0.0323551	0.0453273	-0.0364028	-0.0176031	-0.00432351	-0.0350758	-0.0364028	-0.0372275	-0.00446897	-0.00600363	-0.0121154	-0.0220261	-0.0201201	0.194538	0.0108191	0.0898645	-0.055818	0.0570232	-0.0576013	0.0303009	-0.0260327	0.0825813	-0.0109533	-0.0323551	0.0453273	-0.0364028	-0.0176031	-0.00432351	-0.0350758	-0.0364028	-0.0372275	-0.020785	-0.020785	0.0115305
11	0.000728241	-0.0417367	0.0142742	-0.00632502	-0.0191422	-0.0953632	-0.0344382	-0.0507554	-0.00415977	0.0284017	0.0279386	-0.013985	0.0327234	-0.0154103	-0.0039808	0.0229178	-0.0128071	-0.0115325	-0.00719036	-0.0454856	-0.00533886	-0.0115325	-0.0735113	0.000728241	-0.0417367	0.0142742	-0.00632502	-0.0191422	-0.0953632	-0.0344382	-0.0507554	-0.00415977	0.0284017	0.0279386	-0.013985	0.0327234	-0.0154103	-0.0039808	0.0229178	-0.0128071	-0.0115325	-0.00719036	-0.0454856	-0.00533886	-0.0115325	-0.0735113	0.00868176	0.00868176	-0.00948865
12	0.0557914	0.0368778	0.00680117	0.000900715	-0.0168399	-0.0463863	0.00413794	-0.0140381	-0.0198611	0.0222425	0.0216432	0.0111055	0.0075023	0.0537487	-0.00731141	-0.0359644	0.025381	-0.0501009	-0.0803771	0.00418933	0.0423111	-0.0501009	-0.025796	0.0557914	0.0368778	0.00680117	0.000900715	-0.0168399	-0.0463863	0.00413794	-0.0140381	-0.0198611	0.0222425	0.0216432	0.0111055	0.0075023	0.0537487	-0.00731141	-0.0359644	0.025381	-0.0501009	-0.0803771	0.00418933	0.0423111	-0.0501009	-0.025796	-0.0292175	-0.0292175	-0.000151219
13	0.0146327	-0.0315235	-0.0277228	-0.0435946	-0.0106868	-0.188124	0.0216642	-0.064142	0.0631482	0.159614	0.0126026	-0.0702721	0.0684791	-0.0507449	0.00556607	-0.0276076	0.0228571	0.0813495	0.0195013	0.0339124	0.085117	0.0813495	-0.0337408	0.0146327	-0.0315235	-0.0277228	-0.0435946	-0.0106868	-0.188124	0.0216642	-0.064142	0.0631482	0.159614	0.0126026	-0.0702721	0.0684791	-0.0507449	0.00556607	-0.0276076	0.0228571	0.0813495	0.0195013	0.0339124	0.085117	0.0813495	-0.0337408	0.0138271	0.0138271	-0.0086911
14	0.00345706	0.0187588	-0.0149112	-0.0160499	-0.00761032	-0.14925	-0.016168	-0.135526	0.0175795	-0.0574626	-0.060933	-0.129872	-0.0421838	0.00977524	-0.00644717	-0.0205194	-0.00842324	-0.0523874	-0.0143473	0.0464491	0.0263644	-0.0523874	0.137652	0.00345706	0.0187588	-0.0149112	-0.0160499	-0.00761032	-0.14925	-0.016168	-0.135526	0.0175795	-0.0574626	-0.060933	-0.129872	-0.0421838	0.00977524	-0.00644717	-0.0205194	-0.00842324	-0.0523874	-0.0143473	0.0464491	0.0263644	-0.0523874	0.137652	-0.0383611	-0.0383611	-0.0171244
15	-0.03221	0.0527331	-0.00211763	0.0626183	-0.0808558	0.0926036	0.00491108	0.112428	0.0033619	-0.000934869	-0.00117363	-0.0377926	0.0309505	0.00564947	-0.0286994	-0.0109856	-0.0184529	-0.0163151	-0.0482501	0.00755759	-0.0162605	-0.0163151	0.0349816	-0.03221	0.0527331	-0.00211763	0.0626183	-0.0808558	0.0926036	0.00491108	0.112428	0.0033619	-0.000934869	-0.00117363	-0.0377926	0.0309505	0.00564947	-0.0286994	-0.0109856	-0.0184529	-0.0163151	-0.0482501	0.00755759	-0.0162605	-0.0163151	0.0349816	-0.0075325	-0.0075325	-0.00243155
16	-0.0172752	0.0211183	-0.0133497	0.0168734	0.0621512	-0.0604692	-0.0086311	-0.021307	0.0356418	-0.0883609	0.0258298	0.0876923	-0.00165464	0.0177526	-0.0363659	-0.010391	0.0990355	0.0711176	0.0410551	0.00894566	0.0270659	0.0711176	-0.00129645	-0.0172752	0.0211183	-0.0133497	0.0168734	0.0621512	-0.0604692	-0.0086311	-0.021307	0.0356418	-0.0883609	0.0258298	0.0876923	-0.00165464	0.0177526	-0.0363659	-0.010391	0.0990355	0.0711176	0.0410551	0.00894566	0.0270659	0.0711176	-0.00129645	0.00626337	0.00626337	-0.00781821
17	0.00937893	-0.0034351	-0.00736228	0.042082	0.0412064	-0.0320004	0.0181583	-0.0359654	-0.0140424	-0.0385616	-1.94e-05	0.212625	-0.0291412	0.0102061	-0.00135514	0.0689661	-0.05884	-0.0207216	-0.0151279	0.0125936	-0.0108655	-0.0207216	-0.0552393	0.00937893	-0.0034351	-0.00736228	0.042082	0.0412064	-0.0320004	0.0181583	-0.0359654	-0.0140424	-0.0385616	-1.94e-05	0.212625	-0.0291412	0.0102061	-0.00135514	0.0689661	-0.05884	-0.0207216	-0.0151279	0.0125936	-0.0108655	-0.0207216	-0.0552393	-0.00961882	-0.00961882	-0.00303149
18	-0.0323912	0.0251496	0.0226779	0.0691378	-0.0283717	-0.0179175	0.0133249	0.0364496	-0.00399204	-0.0568788	0.0287934	-0.0173142	-0.00657557	-0.0543963	-0.0466378	-0.0193813	-0.0365581	-0.0237518	0.0213041	-0.0312157	0.0384794	-0.0237518	0.039619	-0.0323912	0.0251496	0.0226779	0.0691378	-0.0283717	-0.0179175	0.0133249	0.0364496	-0.00399204	-0.0568788	0.0287934	-0.0173142	-0.00657557	-0.0543963	-0.0466378	-0.0193813	-0.0365581	-0.0237518	0.0213041	-0.0312157	0.0384794	-0.0237518	0.039619	0.0217699	0.0217699	-0.0078836
19	-0.0187358	-0.075563	-0.00910085	-0.0456591	-0.103532	0.099938	-0.00834259	0.193504	0.00292324	0.0110917	-0.0199288	0.0954549	0.0134401	-0.00183177	0.0254655	-0.0145949	-0.0167107	0.0343358	0.0571989	-0.0158269	0.0310078	0.0343358	0.069415	-0.0187358	-0.075563	-0.00910085	-0.0456591	-0.103532	0.099938	-0.00834259	0.193504	0.00292324	0.0110917	-0.0199288	0.0954549	0.0134401	-0.00183177	0.0254655	-0.0145949	-0.0167107	0.0343358	0.0571989	-0.0158269	0.0310078	0.0343358	0.069415	0.0279014	0.0279014	-0.0195241
20	0.00336647	0.045933	-0.00542852	0.0482212	0.0425511	-0.0173114	0.012816	-0.0309879	0.00742592	-0.0524418	-0.000331336	-0.0355839	0.0699912	0.000413906	-0.00754395	-0.0648095	-0.00237248	0.0139062	-0.00398686	-0.0746597	-0.0103934	0.0139062	0.0251864	0.00336647	0.045933	-0.00542852	0.0482212	0.0425511	-0.0173114	0.012816	-0.0309879	0.00742592	-0.0524418	-0.000331336	-0.0355839	0.0699912	0.000413906	-0.00754395	-0.0648095	-0.00237248	0.0139062	-0.00398686	-0.0746597	-0.0103934	0.0139062	0.0251864	-0.00792494	-0.00792494	-0.0107824
21	0.0266463	0.0327508	0.0147061	0.0266526	0.172294	-0.0378194	0.00327565	0.126582	0.0824749	0.0278325	0.00879666	0.181623	0.00288168	0.10049	-0.0149669	-0.0542546	0.0134772	-0.00914338	-0.00350372	-0.0269871	-0.0143353	-0.00914338	0.0716643	0.0266463	0.0327508	0.0147061	0.0266526	0.172294	-0.0378194	0.00327565	0.126582	0.0824749	0.0278325	0.00879666	0.181623	0.00288168	0.10049	-0.0149669	-0.0542546	0.0134772	-0.00914338	-0.00350372	-0.0269871	-0.0143353	-0.00914338	0.0716643	-0.0099643	-0.0099643	-0.0156785
22	0.0628343	-0.026787	-0.00195678	0.0955416	0.0940573	-0.173738	0.023956	-0.0659181	0.0251012	-0.0242582	-0.0157734	-0.0693465	-0.0398524	0.0315139	0.0430505	0.00898622	0.0079821	-0.0517848	0.00459609	0.0129484	-0.0141552	-0.0517848	0.0765215	0.0628343	-0.026787	-0.00195678	0.0955416	0.0940573	-0.173738	0.023956	-0.0659181	0.0251012	-0.0242582	-0.0157734	-0.0693465	-0.0398524	0.0315139	0.0430505	0.00898622	0.0079821	-0.0517848	0.00459609	0.0129484	-0.0141552	-0.0517848	0.0765215	0.00716901	0.00716901	-0.0136527
23	0.0480239	-0.0471698	-0.0139913	-0.0399546	0.214775	-0.0421029	-0.0147158	-0.083767	-0.00837861	-0.0577399	8.67e-05	0.0891701	-0.0085197	0.0628141	0.0235942	-0.0147119	0.0111605	-0.1483	0.00187753	-0.0384049	-0.0163716	-0.1483	0.0604525	0.0480239	-0.0471698	-0.0139913	-0.0399546	0.214775	-0.0421029	-0.0147158	-0.083767	-0.00837861	-0.0577399	8.67e-05	0.0891701	-0.0085197	0.0628141	0.0235942	-0.0147119	0.0111605	-0.1483	0.00187753	-0.0384049	-0.0163716	-0.1483	0.0604525	0.0476141	0.0476141	0.0105297
24	0.0415246	0.048606	-0.0017634	-0.0225694	0.0625383	-0.0754613	0.00987736	0.15603	0.049266	-0.146742	-0.028177	-0.109767	0.00873253	0.0407142	0.0336446	-0.0473211	-0.00698707	0.0614926	0.0921238	0.00774025	0.0221117	0.0614926	0.154426	0.0415246	0.048606	-0.0017634	-0.0225694	0.0625383	-0.0754613	0.00987736	0.15603	0.049266	-0.146742	-0.028177	-0.109767	0.00873253	0.0407142	0.0336446	-0.0473211	-0.00698707	0.0614926	0.0921238	0.00774025	0.0221117	0.0614926	0.154426	-0.0157034	-0.0157034	-0.00626292
25	0.0205433	0.016791	-0.0104617	-0.0620121	0.10616	0.118628	0.0345061	-0.116537	0.000781569	0.0614456	-0.0279774	0.130322	-0.00901759	0.00610208	0.0235631	0.0333045	0.0106237	0.053855	-0.0384016	-0.0122972	-0.0180863	0.053855	0.0684436	0.0205433	0.016791	-0.0104617	-0.0620121	0.10616	0.118628	0.0345061	-0.116537	0.000781569	0.0614456	-0.0279774	0.130322	-0.00901759	0.00610208	0.0235631	0.0333045	0.0106237	0.053855	-0.0384016	-0.0122972	-0.0180863	0.053855	0.0684436	0.0267006	0.0267006	-0.00605109
26	-0.050338	0.0605257	-0.0195649	0.0439292	0.0533087	0.0433035	-0.0167272	0.0567214	0.0342743	-0.0507341	0.0298229	-0.13744	0.0229843	-0.0180389	-0.00631534	-0.0211531	0.0196975	-0.0360993	0.0363463	-0.00348343	-0.00794674	-0.0360993	0.00400012	-0.050338	0.0605257	-0.0195649	0.0439292	0.0533087	0.0433035	-0.0167272	0.0567214	0.0342743	-0.0507341	0.0298229	-0.13744	0.0229843	-0.0180389	-0.00631534	-0.0211531	0.0196975	-0.0360993	0.0363463	-0.00348343	-0.00794674	-0.0360993	0.00400012	0.00710192	0.00710192	-0.0215642
27	0.0171804	-0.013805	-0.0514032	0.00475806	0.130201	-0.106698	0.033968	0.0681893	0.0185213	-0.118559	-0.038609	0.221313	-0.0403266	0.0147366	0.014289	0.0166569	0.0103553	0.103865	-0.000893316	-0.0508666	0.0403455	0.103865	0.0663215	0.0171804	-0.013805	-0.0514032	0.00475806	0.130201	-0.106698	0.033968	0.0681893	0.0185213	-0.118559	-0.038609	0.221313	-0.0403266	0.0147366	0.014289	0.0166569	0.0103553	0.103865	-0.000893316	-0.0508666	0.0403455	0.103865	0.0663215	-0.00527847	-0.00527847	-0.00971612
28	-0.0110249	-0.0439047	-0.0380675	-0.0698355	0.0181427	-0.204652	0.00548486	0.183691	0.00946438	0.0751944	-0.0441183	-0.104408	0.0277787	-0.00806396	0.00868428	0.0077701	0.0029296	0.0220182	-0.0639088	-0.00224626	-0.00401477	0.0220182	0.0549767	-0.0110249	-0.0439047	-0.0380675	-0.0698355	0.0181427	-0.204652	0.00548486	0.183691	0.00946438	0.0751944	-0.0441183	-0.104408	0.0277787	-0.00806396	0.00868428	0.0077701	0.0029296	0.0220182	-0.0639088	-0.00224626	-0.00401477	0.0220182	0.0549767	0.00146349	0.00146349	-0.01038
29	0.0192412	-0.00359182	-0.00389958	0.0681599	0.0579337	-0.0699655	0.0307409	-0.0332903	-0.0284794	0.0293942	0.00122223	0.228507	0.030089	-0.0294632	-0.0336193	-0.0131326	0.0265676	-0.00224519	0.0531895	0.00967719	0.0389416	-0.00224519	0.100443	0.0192412	-0.00359182	-0.00389958	0.0681599	0.0579337	-0.0699655	0.0307409	-0.0332903	-0.0284794	0.0293942	0.00122223	0.228507	0.030089	-0.0294632	-0.0336193	-0.0131326	0.0265676	-0.00224519	0.0531895	0.00967719	0.0389416	-0.00224519	0.100443	-0.0182526	-0.0182526	-0.0297799
30	0.0121983	-0.0315235	-0.0151317	0.0188836	0.0613769	0.0475869	0.00920633	0.138565	-0.0293051	0.170633	0.0130269	0.0950814	0.0328314	-0.0149533	-0.00637576	0.000836612	0.0185674	-0.0654145	-0.00805028	-0.0134488	-0.0381253	-0.0654145	0.117437	0.0121983	-0.0315235	-0.0151317	0.0188836	0.0613769	0.0475869	0.00920633	0.138565	-0.0293051	0.170633	0.0130269	0.0950814	0.0328314	-0.0149533	-0.00637576	0.000836612	0.0185674	-0.0654145	-0.00805028	-0.0134488	-0.0381253	-0.0654145	0.117437	0.0649453	0.0649453	-0.0273205
31	0.0195809	-0.0609615	-0.00938098	-0.0584264	0.0152496	-0.0405673	0.00829217	0.0808085	-0.0630042	0.055155	-0.0509253	-0.0281948	0.0353999	0.0225356	0.00315097	-0.0464413	-0.0371326	0.0722972	0.0774872	-0.00103027	-0.0559478	0.0722972	-0.0326364	0.0195809	-0.0609615	-0.00938098	-0.0584264	0.0152496	-0.0405673	0.00829217	0.0808085	-0.0630042	0.055155	-0.0509253	-0.0281948	0.0353999	0.0225356	0.00315097	-0.0464413	-0.0371326	0.0722972	0.0774872	-0.00103027	-0.0559478	0.0722972	-0.0326364	0.0316984	0.0316984	0.0143426
32	0.0200338	-0.0145625	-0.0196751	0.0409954	-0.0268436	0.0408587	0.00410714	0.0792846	0.0271397	-0.0822163	-0.0372364	0.0247631	0.0426337	-0.00643192	-0.0133281	0.013513	-0.0119266	-0.0259059	0.00669451	0.0238288	-0.0040049	-0.0259059	-0.00138896	0.0200338	-0.0145625	-0.0196751	0.0409954	-0.0268436	0.0408587	0.00410714	0.0792846	0.0271397	-0.0822163	-0.0372364	0.0247631	0.0426337	-0.00643192	-0.0133281	0.013513	-0.0119266	-0.0259059	0.00669451	0.0238288	-0.0040049	-0.0259059	-0.00138896	-0.0111651	-0.0111651	-0.0156103
33	-0.0217364	0.0247491	0.00346498	-0.00887848	0.109236	-0.129045	0.0135389	0.0143907	-0.0179387	-0.0432905	0.03147	0.116485	0.0238694	0.0567647	0.0331118	0.0121287	-0.0510282	0.00431536	-0.0617563	-0.00186946	0.00339683	0.00431536	0.0105746	-0.0217364	0.0247491	0.00346498	-0.00887848	0.109236	-0.129045	0.0135389	0.0143907	-0.0179387	-0.0432905	0.03147	0.116485	0.0238694	0.0567647	0.0331118	0.0121287	-0.0510282	0.00431536	-0.0617563	-0.00186946	0.00339683	0.00431536	0.0105746	-0.000411509	-0.000411509	-0.011806
34	0.0725154	-0.0323246	-0.0322409	-0.010943	0.120401	-0.166707	0.0243175	0.0280295	0.0730309	0.0664664	0.0354943	-0.066943	0.0363719	0.0126085	-0.0208334	-0.0287847	0.0372094	0.0394175	0.10399	0.0119803	0.0292125	0.0394175	-0.000197815	0.0725154	-0.0323246	-0.0322409	-0.010943	0.120401	-0.166707	0.0243175	0.0280295	0.0730309	0.0664664	0.0354943	-0.066943	0.0363719	0.0126085	-0.0208334	-0.0287847	0.0372094	0.0394175	0.10399	0.0119803	0.0292125	0.0394175	-0.000197815	0.017936	0.017936	-0.0188687
35	0.0438345	-0.0265432	0.011032	0.0400718	0.0767595	-0.136703	0.0181356	0.0599008	0.0843972	-0.0216894	-0.0132653	0.0070455	0.0412507	0.0259128	0.00649073	0.00978799	0.0257247	-0.000497131	-0.0159338	0.0329329	0.0512976	-0.000497131	0.0594348	0.0438345	-0.0265432	0.011032	0.0400718	0.0767595	-0.136703	0.0181356	0.0599008	0.0843972	-0.0216894	-0.0132653	0.0070455	0.0412507	0.0259128	0.00649073	0.00978799	0.0257247	-0.000497131	-0.0159338	0.0329329	0.0512976	-0.000497131	0.0594348	-0.0176421	-0.0176421	-0.0184991
36	0.0201243	-0.0524114	-0.00595081	0.00981065	0.0709936	-0.217219	0.0126393	0.0731668	-0.0683842	0.00450919	0.0333168	0.0415551	0.0309083	0.0847356	-0.0291224	-0.0365065	0.0401194	0.0666085	0.00865771	0.0239788	0.0304864	0.0666085	0.0424407	0.0201243	-0.0524114	-0.00595081	0.00981065	0.0709936	-0.217219	0.0126393	0.0731668	-0.0683842	0.00450919	0.0333168	0.0415551	0.0309083	0.0847356	-0.0291224	-0.0365065	0.0401194	0.0666085	0.00865771	0.0239788	0.0304864	0.0666085	0.0424407	0.0281966	0.0281966	-0.0131494
37	-0.0328781	-0.0533169	-0.00211763	-0.0102367	0.111925	-0.00904757	0.0208683	0.0328754	-0.0404521	-0.0153842	0.0902748	0.060377	0.000118268	0.0533179	0.0661798	-0.0538268	0.0290962	0.00630276	0.0124255	0.0455985	0.0509366	0.00630276	0.0557284	-0.0328781	-0.0533169	-0.00211763	-0.0102367	0.111925	-0.00904757	0.0208683	0.0328754	-0.0404521	-0.0153842	0.0902748	0.060377	0.000118268	0.0533179	0.0661798	-0.0538268	0.0290962	0.00630276	0.0124255	0.0455985	0.0509366	0.00630276	0.0557284	0.00471708	0.00471708	-0.0170774
38	0.00956009	-0.0216586	-0.0373663	0.058761	-0.00646937	0.0543354	-0.000437714	0.0401443	0.04048	-0.256061	0.0434182	-0.0466432	0.0429788	0.0852796	0.0506473	0.0174842	-0.021782	-0.0502376	0.0297807	0.00156321	0.0312586	-0.0502376	0.0962911	0.00956009	-0.0216586	-0.0373663	0.058761	-0.00646937	0.0543354	-0.000437714	0.0401443	0.04048	-0.256061	0.0434182	-0.0466432	0.0429788	0.0852796	0.0506473	0.0174842	-0.021782	-0.0502376	0.0297807	0.00156321	0.0312586	-0.0502376	0.0962911	0.0172484	0.0172484	-0.00509005
39	-0.019619	-0.0196473	-0.00732794	0.0490361	0.0438958	-0.00904757	0.0289142	0.0755898	0.0749532	-0.0274108	0.00658173	0.00262828	0.0398045	0.0348911	0.0382111	-0.0198858	0.0508413	0.00727723	-0.0168225	-0.00564716	-0.0510832	0.00727723	-0.00160869	-0.019619	-0.0196473	-0.00732794	0.0490361	0.0438958	-0.00904757	0.0289142	0.0755898	0.0749532	-0.0274108	0.00658173	0.00262828	0.0398045	0.0348911	0.0382111	-0.0198858	0.0508413	0.00727723	-0.0168225	-0.00564716	-0.0510832	0.00727723	-0.00160869	0.0433408	0.0433408	-0.016233
40	-0.0130291	0.01599	0.0077554	-0.0356626	-0.0552861	-0.142522	-0.00160148	0.0870578	0.0317455	-0.0143918	0.00371169	0.0214502	0.00907763	0.0402181	0.0392475	0.0460065	-0.0250358	-0.00493779	-0.00562917	0.0103664	-0.0198216	-0.00493779	-0.0615478	-0.0130291	0.01599	0.0077554	-0.0356626	-0.0552861	-0.142522	-0.00160148	0.0870578	0.0317455	-0.0143918	0.00371169	0.0214502	0.00907763	0.0402181	0.0392475	0.0460065	-0.0250358	-0.00493779	-0.00562917	0.0103664	-0.0198216	-0.00493779	-0.0615478	0.0579082	0.0579082	-0.0291715
41	0.0254348	-0.00359182	-0.00815566	0.0808728	0.151533	-0.114356	0.0239479	-0.0872096	0.0264817	0.108107	0.00962024	0.0293752	0.00519199	0.112206	0.0323775	0.0153237	-0.000649066	0.0989497	0.0308569	-0.0401804	0.0120725	0.0989497	0.048223	0.0254348	-0.00359182	-0.00815566	0.0808728	0.151533	-0.114356	0.0239479	-0.0872096	0.0264817	0.108107	0.00962024	0.0293752	0.00519199	0.112206	0.0323775	0.0153237	-0.000649066	0.0989497	0.0308569	-0.0401804	0.0120725	0.0989497	0.048223	0.0365184	0.0365184	-0.0134821
42	0.0296243	-0.00585561	-0.00606105	0.0934228	0.0994361	0.178616	0.0293275	0.0968812	0.0963699	-0.096943	0.208895	0.258762	0.0530841	0.0927826	0.0697924	0.00804184	0.00252935	0.105848	-0.00272312	-0.00336519	-0.0512839	0.105848	0.150141	0.0296243	-0.00585561	-0.00606105	0.0934228	0.0994361	0.178616	0.0293275	0.0968812	0.0963699	-0.096943	0.208895	0.258762	0.0530841	0.0927826	0.0697924	0.00804184	0.00252935	0.105848	-0.00272312	-0.00336519	-0.0512839	0.105848	0.150141	0.0251543	0.0251543	-0.00179892
43	0.0835325	-0.0736997	0.0058126	0.0599562	0.0688747	-0.0148464	0.045925	-0.0289487	0.0251657	-0.0593162	0.161795	0.0819759	0.0157082	0.0887917	0.0312295	0.00593381	0.0593406	0.0529446	0.0434222	-0.0167526	0.0395732	0.0529446	0.141404	0.0835325	-0.0736997	0.0058126	0.0599562	0.0688747	-0.0148464	0.045925	-0.0289487	0.0251657	-0.0593162	0.161795	0.0819759	0.0157082	0.0887917	0.0312295	0.00593381	0.0593406	0.0529446	0.0434222	-0.0167526	0.0395732	0.0529446	0.141404	-0.0161964	-0.0161964	-0.0095313
44	0.0571842	-0.0504436	-0.0212456	0.0877726	0.0915512	-0.00965372	0.0435245	0.0706123	0.074192	-0.0774874	0.190121	0.0766168	0.0178868	0.108898	0.0311086	0.0245603	0.12379	0.0586675	0.0249637	-0.0201209	-0.0110555	0.0586675	0.108255	0.0571842	-0.0504436	-0.0212456	0.0877726	0.0915512	-0.00965372	0.0435245	0.0706123	0.074192	-0.0774874	0.190121	0.0766168	0.0178868	0.108898	0.0311086	0.0245603	0.12379	0.0586675	0.0249637	-0.0201209	-0.0110555	0.0586675	0.108255	0.0354987	0.0354987	-0.0162884
45	0.0645327	0.0211706	-0.00752131	-0.0134421	0.0487041	-0.00720892	0.00950781	0.110904	0.0229595	0.0467189	0.177861	0.054287	-0.00776365	0.0634974	0.0536758	0.017834	0.0530026	0.171607	0.108913	0.0311892	-0.0088588	0.171607	0.124763	0.0645327	0.0211706	-0.00752131	-0.0134421	0.0487041	-0.00720892	0.00950781	0.110904	0.0229595	0.0467189	0.177861	0.054287	-0.00776365	0.0634974	0.0536758	0.017834	0.0530026	0.171607	0.108913	0.0311892	-0.0088588	0.171607	0.124763	0.0391145	0.0391145	-0.00155013
46	0.0481711	0.0081886	-0.00900868	0.106136	0.133074	-0.0148464	0.0284863	0.0637271	0.0894547	-0.0384303	0.247572	0.245105	-0.0184538	0.0636976	0.0446197	-0.011038	0.0512792	-0.0213627	-0.0193788	0.00465173	0.0185309	-0.0213627	0.129886	0.0481711	0.0081886	-0.00900868	0.106136	0.133074	-0.0148464	0.0284863	0.0637271	0.0894547	-0.0384303	0.247572	0.245105	-0.0184538	0.0636976	0.0446197	-0.011038	0.0512792	-0.0213627	-0.0193788	0.00465173	0.0185309	-0.0213627	0.129886	-0.0116582	-0.0116582	-0.0281692
47	0.0373918	0.0303302	0.00561019	0.0941834	0.210354	-0.00444084	0.0180027	0.0118471	0.10273	0.100941	0.166281	-0.0387182	0.0114538	0.0853927	0.0596614	0.071553	-0.0196584	0.034199	-0.000274969	0.00685782	0.0111497	0.034199	0.193266	0.0373918	0.0303302	0.00561019	0.0941834	0.210354	-0.00444084	0.0180027	0.0118471	0.10273	0.100941	0.166281	-0.0387182	0.0114538	0.0853927	0.0596614	0.071553	-0.0196584	0.034199	-0.000274969	0.00685782	0.0111497	0.034199	0.193266	0.0258956	0.0258956	0.00830052
48	-0.0093831	-0.043095	-0.0125636	0.0778304	0.0900232	-0.115568	0.00462419	0.0871894	0.0537042	0.0407056	0.152243	-0.0217314	0.0249495	0.0290637	0.0604963	-0.000715821	0.0195421	0.0488416	0.0214123	0.0380122	-0.0344441	0.0488416	0.11554	-0.0093831	-0.043095	-0.0125636	0.0778304	0.0900232	-0.115568	0.00462419	0.0871894	0.0537042	0.0407056	0.152243	-0.0217314	0.0249495	0.0290637	0.0604963	-0.000715821	0.0195421	0.0488416	0.0214123	0.0380122	-0.0344441	0.0488416	0.11554	0.0330467	0.0330467	-0.00902804
49	-0.00990395	0.00763136	0.0142326	-0.000892137	-0.0725839	0.0570833	0.0231229	0.227042	0.162078	0.0490104	0.178629	0.108366	0.00197284	0.0994674	0.0651233	-0.012616	0.0200224	0.010675	0.0209544	0.0113565	0.0252007	0.010675	0.107196	-0.00990395	0.00763136	0.0142326	-0.000892137	-0.0725839	0.0570833	0.0231229	0.227042	0.162078	0.0490104	0.178629	0.108366	0.00197284	0.0994674	0.0651233	-0.012616	0.0200224	0.010675	0.0209544	0.0113565	0.0252007	0.010675	0.107196	0.0223602	0.0223602	-0.00689555
50	0.0820492	0.000186969	-0.0178588	-0.0127902	0.00679428	0.000448763	0.0160431	0.0642424	0.089016	0.128701	0.222247	0.0869615	0.0336928	0.022627	0.0630213	0.0287508	-0.00752387	0.041469	0.063038	-0.0223702	0.0619586	0.041469	0.0977945	0.0820492	0.000186969	-0.0178588	-0.0127902	0.00679428	0.000448763	0.0160431	0.0642424	0.089016	0.128701	0.222247	0.0869615	0.0336928	0.022627	0.0630213	0.0287508	-0.00752387	0.041469	0.063038	-0.0223702	0.0619586	0.041469	0.0977945	0.00960081	0.00960081	-0.0172722
51	0.00831458	-0.0129517	-0.00682191	0.140798	0.0660019	-0.148017	-0.00625007	0.0656458	0.0492015	-0.134438	0.17433	0.20064	0.0178868	0.122908	0.0730406	0.0495768	0.0160011	-0.040946	0.0422918	0.0359243	0.0171369	-0.040946	0.0987659	0.00831458	-0.0129517	-0.00682191	0.140798	0.0660019	-0.148017	-0.00625007	0.0656458	0.0492015	-0.134438	0.17433	0.20064	0.0178868	0.122908	0.0730406	0.0495768	0.0160011	-0.040946	0.0422918	0.0359243	0.0171369	-0.040946	0.0987659	0.0099463	0.0099463	-0.0115856
52	0.0132627	-0.0944308	-0.0174449	0.0385506	0.0583004	-0.132096	0.0289661	-0.0464138	0.0546976	-0.0294104	0.183495	0.112247	0.0487006	0.0422331	0.0198626	0.0450756	0.0312575	0.0254502	0.0154667	-0.00217125	0.0362235	0.0254502	0.114349	0.0132627	-0.0944308	-0.0174449	0.0385506	0.0583004	-0.132096	0.0289661	-0.0464138	0.0546976	-0.0294104	0.183495	0.112247	0.0487006	0.0422331	0.0198626	0.0450756	0.0312575	0.0254502	0.0154667	-0.00217125	0.0362235	0.0254502	0.114349	0.0328824	0.0328824	-0.0207425
53	-0.011693	-0.0244797	-0.0057737	0.0211654	0.0075685	-0.147714	0.0342338	0.0781334	0.00479398	0.120411	0.182509	0.196759	0.0236112	0.0658997	0.0731724	0.0040195	-0.0192769	0.107968	0.0440946	-0.0167853	0.0368552	0.107968	0.0578505	-0.011693	-0.0244797	-0.0057737	0.0211654	0.0075685	-0.147714	0.0342338	0.0781334	0.00479398	0.120411	0.182509	0.196759	0.0236112	0.0658997	0.0731724	0.0040195	-0.0192769	0.107968	0.0440946	-0.0167853	0.0368552	0.107968	0.0578505	0.0267341	0.0267341	-0.0397045
54	0.00190582	-0.0110885	0.000450482	0.0762005	0.107321	0.173727	0.0261004	-0.0330272	0.0317455	0.00264099	0.1519	0.340513	0.0366959	0.0651512	0.0732731	-0.00795872	-0.00643143	0.0730024	-0.0195393	0.0268097	0.0163852	0.0730024	0.145683	0.00190582	-0.0110885	0.000450482	0.0762005	0.107321	0.173727	0.0261004	-0.0330272	0.0317455	0.00264099	0.1519	0.340513	0.0366959	0.0651512	0.0732731	-0.00795872	-0.00643143	0.0730024	-0.0195393	0.0268097	0.0163852	0.0730024	0.145683	-0.00812284	-0.00812284	-0.0145569
55	0.0398488	-0.0349976	-0.000706161	-0.0540258	-0.00703985	-0.0371931	0.0252673	-0.0596798	0.0188955	-0.0278341	0.151513	-0.0191493	0.0113879	0.0345038	0.0163306	0.00329441	-0.00553206	0.0735409	0.0656196	-0.0229729	0.00388864	0.0735409	0.0699007	0.0398488	-0.0349976	-0.000706161	-0.0540258	-0.00703985	-0.0371931	0.0252673	-0.0596798	0.0188955	-0.0278341	0.151513	-0.0191493	0.0113879	0.0345038	0.0163306	0.00329441	-0.00553206	0.0735409	0.0656196	-0.0229729	0.00388864	0.0735409	0.0699007	0.040956	0.040956	0.0101131
56	0.0286505	-0.00298234	0.000331203	0.0903804	0.101555	-0.1621	-0.0366264	0.0694721	0.123541	-0.2067	0.210848	0.152294	-0.0314726	0.110282	0.0515226	0.0100597	-0.00633726	0.090671	0.0455476	0.0105808	0.0430233	0.090671	0.0468988	0.0286505	-0.00298234	0.000331203	0.0903804	0.101555	-0.1621	-0.0366264	0.0694721	0.123541	-0.2067	0.210848	0.152294	-0.0314726	0.110282	0.0515226	0.0100597	-0.00633726	0.090671	0.0455476	0.0105808	0.0430233	0.090671	0.0468988	0.0663608	0.0663608	-0.0245923
57	0.0513302	0.0683794	0.00636924	0.0580547	0.140185	-0.054044	0.0230208	-0.0160773	0.0771465	0.0132372	0.159	0.17628	0.060318	0.127438	0.0573177	0.00629569	-0.0278328	0.0826616	0.0679343	0.0528627	0.010528	0.0826616	0.153628	0.0513302	0.0683794	0.00636924	0.0580547	0.140185	-0.054044	0.0230208	-0.0160773	0.0771465	0.0132372	0.159	0.17628	0.060318	0.127438	0.0573177	0.00629569	-0.0278328	0.0826616	0.0679343	0.0528627	0.010528	0.0826616	0.153628	0.0439144	0.0439144	0.0114381
58	-0.0346671	-0.0568345	0.0111079	0.133735	-0.121991	0.109737	0.00558212	-0.017097	0.0737533	-0.209852	0.188711	0.10947	0.0670988	0.0869116	0.030173	0.000746479	-0.0203647	0.044059	0.115506	0.0140038	0.00742831	0.044059	0.0312346	-0.0346671	-0.0568345	0.0111079	0.133735	-0.121991	0.109737	0.00558212	-0.017097	0.0737533	-0.209852	0.188711	0.10947	0.0670988	0.0869116	0.030173	0.000746479	-0.0203647	0.044059	0.115506	0.0140038	0.00742831	0.044059	0.0312346	0.0385879	0.0385879	-0.0146734
59	0.0367237	-0.00756217	-0.0177739	0.0522958	0.0882913	0.24107	0.0355597	0.0376007	0.120419	0.0816309	0.184375	0.100067	0.0271939	0.0884087	0.0465916	0.0383103	0.0436039	0.102818	0.107435	0.0515717	-0.0260292	0.102818	0.0470318	0.0367237	-0.00756217	-0.0177739	0.0522958	0.0882913	0.24107	0.0355597	0.0376007	0.120419	0.0816309	0.184375	0.100067	0.0271939	0.0884087	0.0465916	0.0383103	0.0436039	0.102818	0.107435	0.0515717	-0.0260292	0.102818	0.0470318	0.0474195	0.0474195	-0.004601
60	-0.0168222	-0.011994	0.0269087	0.100866	0.169401	-0.0145433	0.0303649	-0.0896325	-0.0142618	0.0355535	0.161065	0.117963	-0.000703644	0.0664655	0.0767831	0.0148072	-0.0180903	0.105544	0.0199051	0.00189677	-0.019681	0.105544	0.093556	-0.0168222	-0.011994	0.0269087	0.100866	0.169401	-0.0145433	0.0303649	-0.0896325	-0.0142618	0.0355535	0.161065	0.117963	-0.000703644	0.0664655	0.0767831	0.0148072	-0.0180903	0.105544	0.0199051	0.00189677	-0.019681	0.105544	0.093556	0.0584348	0.0584348	0.00595052
61	0.0536401	0.0151802	0.0134645	0.104017	0.000254142	-0.0117954	0.0436866	0.142644	0.111736	-0.0606006	0.218971	-0.0145372	0.0383582	0.109307	0.0413513	0.0345973	0.0696387	0.0225225	0.0127211	0.00939746	0.0561317	0.0225225	0.174907	0.0536401	0.0151802	0.0134645	0.104017	0.000254142	-0.0117954	0.0436866	0.142644	0.111736	-0.0606006	0.218971	-0.0145372	0.0383582	0.109307	0.0413513	0.0345973	0.0696387	0.0225225	0.0127211	0.00939746	0.0561317	0.0225225	0.174907	0.0303332	0.0303332	-0.0112245
62	0.0721191	0.075728	0.0255496	0.0713653	-0.0168399	0.0105512	0.0453431	-0.0109792	0.0590842	-0.00837849	0.159143	0.020898	0.04516	0.0860934	0.0512699	-0.0171818	0.00815633	-0.0263418	0.0183728	0.0371509	0.0127641	-0.0263418	0.0529471	0.0721191	0.075728	0.0255496	0.0713653	-0.0168399	0.0105512	0.0453431	-0.0109792	0.0590842	-0.00837849	0.159143	0.020898	0.04516	0.0860934	0.0512699	-0.0171818	0.00815633	-0.0263418	0.0183728	0.0371509	0.0127641	-0.0263418	0.0529471	0.0166883	0.0166883	-0.0140863
63	0.0276201	0.0435647	0.00347402	0.122815	0.04467	-0.125368	0.00109399	-0.117294	0.128211	0.00764719	0.203897	0.0572427	0.0339088	0.0685066	0.0448613	0.0582565	0.00541582	0.0289505	-0.000624704	0.033105	0.0116111	0.0289505	0.143833	0.0276201	0.0435647	0.00347402	0.122815	0.04467	-0.125368	0.00109399	-0.117294	0.128211	0.00764719	0.203897	0.0572427	0.0339088	0.0685066	0.0448613	0.0582565	0.00541582	0.0289505	-0.000624704	0.033105	0.0116111	0.0289505	0.143833	0.0270293	0.0270293	-0.00410769
64	0.0480466	-0.0196473	-4.83e-05	0.117002	0.144219	-0.0671975	0.0446591	0.232524	0.156917	0.0985177	0.146553	0.160041	-0.0250159	0.127416	0.110617	0.0409106	0.00652709	0.0732716	0.0413778	-0.0187866	0.0613969	0.0732716	0.030483	0.0480466	-0.0196473	-4.83e-05	0.117002	0.144219	-0.0671975	0.0446591	0.232524	0.156917	0.0985177	0.146553	0.160041	-0.0250159	0.127416	0.110617	0.0409106	0.00652709	0.0732716	0.0413778	-0.0187866	0.0613969	0.0732716	0.030483	0.0312724	0.0312724	-0.0192796
65	0.0566407	0.030278	0.00437764	0.105484	0.0119897	0.0227955	0.053684	-0.187538	0.090332	-0.0298336	0.221442	0.250464	0.0588507	0.0879996	0.068474	0.0203819	0.0917275	0.0367591	0.0657277	-0.00939222	0.0378379	0.0367591	-0.025929	0.0566407	0.030278	0.00437764	0.105484	0.0119897	0.0227955	0.053684	-0.187538	0.090332	-0.0298336	0.221442	0.250464	0.0588507	0.0879996	0.068474	0.0203819	0.0917275	0.0367591	0.0657277	-0.00939222	0.0378379	0.0367591	-0.025929	0.038655	0.038655	-0.00270878
66	0.0158443	0.0505128	-0.0100641	0.0730495	0.0802231	-0.03689	0.0375128	0.00661743	0.160272	0.137429	0.136327	0.245105	0.035961	0.0983141	0.0847114	-0.00744214	-0.0217255	0.139736	0.023754	-0.0140841	0.0368955	0.139736	0.10534	0.0158443	0.0505128	-0.0100641	0.0730495	0.0802231	-0.03689	0.0375128	0.00661743	0.160272	0.137429	0.136327	0.245105	0.035961	0.0983141	0.0847114	-0.00744214	-0.0217255	0.139736	0.023754	-0.0140841	0.0368955	0.139736	0.10534	0.0383095	0.0383095	-0.010643
67	0.0496884	0.0050193	0.00735058	0.185293	0.171337	0.121375	0.0221504	-0.0193884	0.0966409	0.144011	0.170705	0.107635	0.0667299	0.0967952	0.0555856	0.0552552	0.014014	-0.0239185	-0.00404094	-0.022349	0.0118217	-0.0239185	0.100356	0.0496884	0.0050193	0.00735058	0.185293	0.171337	0.121375	0.0221504	-0.0193884	0.0966409	0.144011	0.170705	0.107635	0.0667299	0.0967952	0.0555856	0.0552552	0.014014	-0.0239185	-0.00404094	-0.022349	0.0118217	-0.0239185	0.100356	0.0107848	0.0107848	-0.0256116
68	0.0697526	0.0184018	0.0170356	0.0122554	0.0679171	-0.0494575	0.0142083	0.0832315	-0.00668849	-0.0598854	0.172645	0.0494963	0.0197677	0.0322625	0.0154956	0.00769207	0.00754419	0.036524	0.161705	0.00555534	-0.00568016	0.036524	0.103976	0.0697526	0.0184018	0.0170356	0.0122554	0.0679171	-0.0494575	0.0142083	0.0832315	-0.00668849	-0.0598854	0.172645	0.0494963	0.0197677	0.0322625	0.0154956	0.00769207	0.00754419	0.036524	0.161705	0.00555534	-0.00568016	0.036524	0.103976	0.0487679	0.0487679	-0.0138645
69	0.0184825	0.0496595	0.0110482	0.0687575	0.0583004	0.201589	0.0440691	-0.161795	0.0656769	0.0498569	0.140831	0.106157	0.0296333	0.120592	0.0855061	0.0366677	0.00936177	0.0858927	0.125111	-0.00175121	-0.0234016	0.0858927	0.112666	0.0184825	0.0496595	0.0110482	0.0687575	0.0583004	0.201589	0.0440691	-0.161795	0.0656769	0.0498569	0.140831	0.106157	0.0296333	0.120592	0.0855061	0.0366677	0.00936177	0.0858927	0.125111	-0.00175121	-0.0234016	0.0858927	0.112666	0.0380948	0.0380948	-0.0279844
70	0.103597	0.0448795	-0.00866169	0.179969	0.186312	-0.150785	0.000416473	0.00610214	0.0916479	-0.0385616	0.209494	0.0862145	0.0499756	0.114926	0.0544705	0.0165923	0.0258801	0.0721262	0.0236188	-0.0322817	0.024579	0.0721262	0.12463	0.103597	0.0448795	-0.00866169	0.179969	0.186312	-0.150785	0.000416473	0.00610214	0.0916479	-0.0385616	0.209494	0.0862145	0.0499756	0.114926	0.0544705	0.0165923	0.0258801	0.0721262	0.0236188	-0.0322817	0.024579	0.0721262	0.12463	0.0463328	0.0463328	-0.0054412
71	-0.0101417	-0.0623198	-0.00125557	0.0762549	0.140388	-0.016685	-0.0142668	-0.0706435	0.0279009	-0.00537185	0.192735	0.20267	0.0284241	0.103367	0.0998722	0.0256594	-0.0022783	-0.0766551	0.0647867	0.0212892	0.0295332	-0.0766551	0.122381	-0.0101417	-0.0623198	-0.00125557	0.0762549	0.140388	-0.016685	-0.0142668	-0.0706435	0.0279009	-0.00537185	0.192735	0.20267	0.0284241	0.103367	0.0998722	0.0256594	-0.0022783	-0.0766551	0.0647867	0.0212892	0.0295332	-0.0766551	0.122381	0.0331641	0.0331641	-0.0298027
72	0.0101376	0.0235389	-0.0213884	0.0938574	0.0304284	0.00596472	0.00973635	0.0790324	0.180257	0.133138	0.172171	0.0360173	-0.00569043	0.0758965	0.0324178	0.0402891	0.0333247	0.0691986	-0.0341507	0.0165972	0.0386505	0.0691986	0.200725	0.0101376	0.0235389	-0.0213884	0.0938574	0.0304284	0.00596472	0.00973635	0.0790324	0.180257	0.133138	0.172171	0.0360173	-0.00569043	0.0758965	0.0324178	0.0402891	0.0333247	0.0691986	-0.0341507	0.0165972	0.0386505	0.0691986	0.200725	0.0434716	0.0434716	-0.0123419
73	0.103721	-0.00509812	0.0138531	0.107874	0.135763	-0.0203623	0.0335563	0.0342787	-0.00772062	-0.00680219	0.234289	0.200088	0.0848252	0.157202	0.0816335	0.0518409	0.0600846	0.0333613	0.0147925	0.0336318	0.0186716	0.0333613	0.156103	0.103721	-0.00509812	0.0138531	0.107874	0.135763	-0.0203623	0.0335563	0.0342787	-0.00772062	-0.00680219	0.234289	0.200088	0.0848252	0.157202	0.0816335	0.0518409	0.0600846	0.0333613	0.0147925	0.0336318	0.0186716	0.0333613	0.156103	0.0280322	0.0280322	0.00371142
74	0.0717001	-0.0535171	-0.0416495	0.00339984	-0.0301035	0.00626779	0.00917715	0.09152	0.1427	0.0329847	0.191949	-0.0937061	0.0264826	0.0919209	0.0723869	0.019373	0.00467184	0.071857	0.0634941	0.0506672	-0.00106641	0.071857	0.151246	0.0717001	-0.0535171	-0.0416495	0.00339984	-0.0301035	0.00626779	0.00917715	0.09152	0.1427	0.0329847	0.191949	-0.0937061	0.0264826	0.0919209	0.0723869	0.019373	0.00467184	0.071857	0.0634941	0.0506672	-0.00106641	0.071857	0.151246	0.0711271	0.0711271	-0.00785091
75	0.0395205	-0.00726613	-0.0126232	0.18149	-0.127167	0.162695	0.0050213	-0.0284443	0.0671606	0.024534	0.175996	0.117216	0.0739217	0.109669	0.0909497	0.0226581	0.0287525	0.0978384	0.0121298	-0.0118021	0.0583679	0.0978384	0.212555	0.0395205	-0.00726613	-0.0126232	0.18149	-0.127167	0.162695	0.0050213	-0.0284443	0.0671606	0.024534	0.175996	0.117216	0.0739217	0.109669	0.0909497	0.0226581	0.0287525	0.0978384	0.0121298	-0.0118021	0.0583679	0.0978384	0.212555	-0.00261523	-0.00261523	-0.00919437
76	0.0495412	0.0340568	-0.0213378	0.142645	-0.0106868	-0.18873	0.0720871	-0.0299683	0.106911	0.00650875	0.170324	0.176085	0.0324415	0.105273	0.0688457	0.0329548	-0.00275389	0.0326176	0.0122903	-0.0326903	0.044187	0.0326176	0.185633	0.0495412	0.0340568	-0.0213378	0.142645	-0.0106868	-0.18873	0.0720871	-0.0299683	0.106911	0.00650875	0.170324	0.176085	0.0324415	0.105273	0.0688457	0.0329548	-0.00275389	0.0326176	0.0122903	-0.0326903	0.044187	0.0326176	0.185633	0.0636304	0.0636304	-0.00350775
77	0.0976861	0.0215276	-0.00456645	0.119881	0.0636996	-0.0359808	0.0299597	0.0757104	0.10971	0.147456	0.213375	-0.108468	0.004241	0.102235	0.020617	0.0359695	-0.00708124	0.0164321	0.0384447	0.0250121	0.0151113	0.0164321	0.0351146	0.0976861	0.0215276	-0.00456645	0.119881	0.0636996	-0.0359808	0.0299597	0.0757104	0.10971	0.147456	0.213375	-0.108468	0.004241	0.102235	0.020617	0.0359695	-0.00708124	0.0164321	0.0384447	0.0250121	0.0151113	0.0164321	0.0351146	0.0209313	0.0209313	-0.0246193
78	0.0705112	0.0970686	-0.0245131	0.0894024	0.245132	-0.0218979	0.0320749	0.0318558	0.0757789	0.0969414	0.206699	0.0971114	0.0546594	0.120366	0.0821663	0.0580749	0.0206911	0.151584	0.0575216	0.0164569	0.0588293	0.151584	0.26045	0.0705112	0.0970686	-0.0245131	0.0894024	0.245132	-0.0218979	0.0320749	0.0318558	0.0757789	0.0969414	0.206699	0.0971114	0.0546594	0.120366	0.0821663	0.0580749	0.0206911	0.151584	0.0575216	0.0164569	0.0588293	0.151584	0.26045	0.0436192	0.0436192	0.00544299
79	0.0248913	-0.0261862	-0.00802012	0.074136	0.222273	-0.178951	0.0166331	0.0318558	0.0854422	0.0504407	0.227064	0.0546606	0.120088	0.119369	0.0448321	0.0149874	0.0597597	-0.0166143	0.0125607	-0.0126961	0.0374868	-0.0166143	0.158572	0.0248913	-0.0261862	-0.00802012	0.074136	0.222273	-0.178951	0.0166331	0.0318558	0.0854422	0.0504407	0.227064	0.0546606	0.120088	0.119369	0.0448321	0.0149874	0.0597597	-0.0166143	0.0125607	-0.0126961	0.0374868	-0.0166143	0.158572	0.0340832	0.0340832	-0.0324811
80	0.0809283	0.0450275	0.00225773	0.133735	0.00699802	-0.0237366	0.00359171	0.00342701	0.175199	0.00421728	0.210923	-0.0680635	0.0459372	0.175903	0.0105867	0.0191793	0.0131335	0.0528463	0.0813342	0.0233443	0.0162545	0.0528463	0.214059	0.0809283	0.0450275	0.00225773	0.133735	0.00699802	-0.0237366	0.00359171	0.00342701	0.175199	0.00421728	0.210923	-0.0680635	0.0459372	0.175903	0.0105867	0.0191793	0.0131335	0.0528463	0.0813342	0.0233443	0.0162545	0.0528463	0.214059	0.04857	0.04857	-0.013556
81	0.0271672	-0.00857217	0.00057699	0.078428	0.051964	-0.144037	0.00046834	0.0690884	0.128095	-0.0523104	0.210904	0.0148081	0.0722383	0.0656952	0.0564223	0.0367578	0.0117727	0.0958211	0.0588664	-0.0122866	0.0256522	0.0958211	0.233834	0.0271672	-0.00857217	0.00057699	0.078428	0.051964	-0.144037	0.00046834	0.0690884	0.128095	-0.0523104	0.210904	0.0148081	0.0722383	0.0656952	0.0564223	0.0367578	0.0117727	0.0958211	0.0588664	-0.0122866	0.0256522	0.0958211	0.233834	0.0378667	0.0378667	-0.0172068
82	0.0841779	0.0169913	-0.0138051	0.11836	0.145951	0.024028	0.00600191	0.0265055	0.0341582	0.0561621	0.146116	0.103006	0.0854521	0.100011	0.0327089	0.00529885	0.038396	0.0495126	0.00341168	0.0282083	0.0231249	0.0495126	0.105167	0.0841779	0.0169913	-0.0138051	0.11836	0.145951	0.024028	0.00600191	0.0265055	0.0341582	0.0561621	0.146116	0.103006	0.0854521	0.100011	0.0327089	0.00529885	0.038396	0.0495126	0.00341168	0.0282083	0.0231249	0.0495126	0.105167	0.0357435	0.0357435	-0.00730215
83	0.0867822	0.0163383	-0.00194774	0.0723432	0.16826	-0.171293	0.0605062	-0.00944433	-0.037588	-0.0477275	0.208015	0.177206	0.0397623	0.0774806	0.086341	0.0371722	0.0699024	0.100463	-0.0147241	0.0531962	0.0150612	0.100463	0.180863	0.0867822	0.0163383	-0.00194774	0.0723432	0.16826	-0.171293	0.0605062	-0.00944433	-0.037588	-0.0477275	0.208015	0.177206	0.0397623	0.0774806	0.086341	0.0371722	0.0699024	0.100463	-0.0147241	0.0531962	0.0150612	0.100463	0.180863	0.0394097	0.0394097	-0.00629561
84	0.0541496	-0.0405787	0.0117151	0.0726691	0.104061	-0.133328	0.0101707	0.0382366	0.149344	0.028825	0.0976309	0.258405	0.0547042	0.141404	0.0335237	0.0823932	0.0923773	0.0332587	-0.0111186	0.0147891	0.0295834	0.0332587	0.114835	0.0541496	-0.0405787	0.0117151	0.0726691	0.104061	-0.133328	0.0101707	0.0382366	0.149344	0.028825	0.0976309	0.258405	0.0547042	0.141404	0.0335237	0.0823932	0.0923773	0.0332587	-0.0111186	0.0147891	0.0295834	0.0332587	0.114835	0.0450682	0.0450682	-7.3e-05
85	0.0501187	0.0976693	-0.00508152	0.0876096	0.221682	0.126891	0.0462054	-0.14012	0.001775	0.164766	0.192374	0.265404	0.0462401	0.155296	0.0812508	0.0116888	-0.00997242	0.0229285	0.0515743	0.0356446	0.0201157	0.0229285	0.121097	0.0501187	0.0976693	-0.00508152	0.0876096	0.221682	0.126891	0.0462054	-0.14012	0.001775	0.164766	0.192374	0.265404	0.0462401	0.155296	0.0812508	0.0116888	-0.00997242	0.0229285	0.0515743	0.0356446	0.0201157	0.0229285	0.121097	0.0392789	0.0392789	-0.00794758
86	0.0798299	0.0250974	-0.00119593	-0.000240191	0.198231	-0.207117	0.0359211	0.0259902	0.0681411	0.144727	0.238425	0.126262	0.0173257	0.125036	0.0842793	0.0938535	0.0013192	0.0423452	0.126108	0.0355581	-0.0267019	0.0423452	0.310235	0.0798299	0.0250974	-0.00119593	-0.000240191	0.198231	-0.207117	0.0359211	0.0259902	0.0681411	0.144727	0.238425	0.126262	0.0173257	0.125036	0.0842793	0.0938535	0.0013192	0.0423452	0.126108	0.0355581	-0.0267019	0.0423452	0.310235	0.0233296	0.0233296	-0.0100246
87	0.076886	0.0212751	-0.021457	0.160193	-0.00799744	-0.0601661	-0.00743654	-0.049352	0.0125866	0.111245	0.18999	0.204148	0.045355	0.115379	0.0829207	0.0352444	0.0664791	-0.0201489	0.089809	-0.0201103	-0.00377463	-0.0201489	0.19914	0.076886	0.0212751	-0.021457	0.160193	-0.00799744	-0.0601661	-0.00743654	-0.049352	0.0125866	0.111245	0.18999	0.204148	0.045355	0.115379	0.0829207	0.0352444	0.0664791	-0.0201489	0.089809	-0.0201103	-0.00377463	-0.0201489	0.19914	0.0729853	0.0729853	-0.0120192
88	0.0509339	0.0936468	-0.0100641	0.018286	0.226694	0.0944423	0.0197937	0.0267577	0.0623225	0.0565853	0.186496	0.230716	0.0481395	0.0913986	0.0529105	0.0917199	0.00985619	0.0581973	0.0149007	-0.0277619	0.0310481	0.0581973	0.143301	0.0509339	0.0936468	-0.0100641	0.018286	0.226694	0.0944423	0.0197937	0.0267577	0.0623225	0.0565853	0.186496	0.230716	0.0481395	0.0913986	0.0529105	0.0917199	0.00985619	0.0581973	0.0149007	-0.0277619	0.0310481	0.0581973	0.143301	0.0367464	0.0367464	-0.0095441
89	0.0670577	0.0537866	-0.011078	0.116132	0.0646572	0.00228742	0.0243175	-0.0497358	0.169226	0.211121	0.221099	0.111873	0.0873726	0.196484	0.0865827	0.0400954	0.0282533	0.0789603	-0.0216647	-0.00893953	0.0395831	0.0789603	0.0688831	0.0670577	0.0537866	-0.011078	0.116132	0.0646572	0.00228742	0.0243175	-0.0497358	0.169226	0.211121	0.221099	0.111873	0.0873726	0.196484	0.0865827	0.0400954	0.0282533	0.0789603	-0.0216647	-0.00893953	0.0395831	0.0789603	0.0688831	0.078067	0.078067	0.00172252
90	0.119143	0.0354673	-0.037444	0.0566421	0.202856	-0.0399612	0.0334818	-0.111056	0.115258	0.0268255	0.139914	0.114082	0.0826018	0.137391	0.051008	0.0599892	0.0295153	0.093432	0.014578	0.0249265	-0.000554871	0.093432	0.175306	0.119143	0.0354673	-0.037444	0.0566421	0.202856	-0.0399612	0.0334818	-0.111056	0.115258	0.0268255	0.139914	0.114082	0.0826018	0.137391	0.051008	0.0599892	0.0295153	0.093432	0.014578	0.0249265	-0.000554871	0.093432	0.175306	0.0818002	0.0818002	-0.0172168
91	0.0247101	0.0050193	-0.0123015	0.00296521	0.199005	-0.000157386	0.00388022	0.0279089	0.106304	-0.123142	0.111276	-0.0446133	0.0184058	0.106814	0.117298	0.0463953	0.020272	0.117661	0.118276	0.0036184	-0.0190995	0.117661	0.253031	0.0247101	0.0050193	-0.0123015	0.00296521	0.199005	-0.000157386	0.00388022	0.0279089	0.106304	-0.123142	0.111276	-0.0446133	0.0184058	0.106814	0.117298	0.0463953	0.020272	0.117661	0.118276	0.0036184	-0.0190995	0.117661	0.253031	0.0715397	0.0715397	-0.0084281
92	0.0447743	-0.012499	0.00298425	0.116187	0.167486	0.0929067	-0.00220606	-0.0383884	0.0783076	0.0063628	0.217474	0.0875137	0.0257266	0.169009	0.0932934	0.0538588	0.0258425	0.0121923	0.0176192	0.0107317	0.0204471	0.0121923	0.181834	0.0447743	-0.012499	0.00298425	0.116187	0.167486	0.0929067	-0.00220606	-0.0383884	0.0783076	0.0063628	0.217474	0.0875137	0.0257266	0.169009	0.0932934	0.0538588	0.0258425	0.0121923	0.0176192	0.0107317	0.0204471	0.0121923	0.181834	0.0571669	0.0571669	-0.0200089
93	0.0973238	-0.041284	-0.00515743	0.153402	0.169014	-0.0307679	0.0578091	-0.219026	0.089016	-0.000934869	0.197309	0.0378686	0.0857762	0.140494	0.0204357	0.0115476	0.0111794	0.0183853	0.0375019	0.0576084	0.0192037	0.0183853	0.243236	0.0973238	-0.041284	-0.00515743	0.153402	0.169014	-0.0307679	0.0578091	-0.219026	0.089016	-0.000934869	0.197309	0.0378686	0.0857762	0.140494	0.0204357	0.0115476	0.0111794	0.0183853	0.0375019	0.0576084	0.0192037	0.0183853	0.243236	0.0750582	0.0750582	-0.00666382
94	0.0961915	-0.0569912	-0.0215149	0.134495	0.0952186	-0.0460833	0.0248248	0.0517439	0.0667219	0.140727	0.242025	0.29069	0.0606631	0.168013	0.0556368	-0.0570353	0.0776954	0.027741	0.0961602	0.00017514	-0.00397447	0.027741	0.22774	0.0961915	-0.0569912	-0.0215149	0.134495	0.0952186	-0.0460833	0.0248248	0.0517439	0.0667219	0.140727	0.242025	0.29069	0.0606631	0.168013	0.0556368	-0.0570353	0.0776954	0.027741	0.0961602	0.00017514	-0.00397447	0.027741	0.22774	0.0378667	0.0378667	-0.0110084
95	0.0945837	-0.0700777	0.0131175	0.0956503	0.221885	-0.088938	0.0331803	0.11689	0.121618	-0.00808658	0.195574	0.203222	0.0581815	0.117511	0.0273569	0.0455155	0.0607156	0.0291514	0.0460867	0.0392388	-0.00403533	0.0291514	0.119513	0.0945837	-0.0700777	0.0131175	0.0956503	0.221885	-0.088938	0.0331803	0.11689	0.121618	-0.00808658	0.195574	0.203222	0.0581815	0.117511	0.0273569	0.0455155	0.0607156	0.0291514	0.0460867	0.0392388	-0.00403533	0.0291514	0.119513	0.0568248	0.0568248	-0.0145753
96	0.0868728	0.0424154	-0.0319789	0.0910866	0.0216064	-0.0718042	0.0538315	-0.0235984	0.126831	-0.0666139	0.170125	0.253419	0.0756261	0.186035	0.0980814	0.0679572	0.0262992	0.0253177	0.0805807	-0.0122866	-0.00292178	0.0253177	0.196313	0.0868728	0.0424154	-0.0319789	0.0910866	0.0216064	-0.0718042	0.0538315	-0.0235984	0.126831	-0.0666139	0.170125	0.253419	0.0756261	0.186035	0.0980814	0.0679572	0.0262992	0.0253177	0.0805807	-0.0122866	-0.00292178	0.0253177	0.196313	0.0353511	0.0353511	-0.0020207
97	0.1121	0.0231819	-0.00421946	0.104723	-0.0673884	0.122608	0.0173333	0.0126036	0.0921382	0.00392538	0.18055	0.306751	0.0785634	0.203621	0.0477488	0.0303423	0.00936177	0.046991	-0.00234634	0.0359676	-0.0244353	0.046991	0.23277	0.1121	0.0231819	-0.00421946	0.104723	-0.0673884	0.122608	0.0173333	0.0126036	0.0921382	0.00392538	0.18055	0.306751	0.0785634	0.203621	0.0477488	0.0303423	0.00936177	0.046991	-0.00234634	0.0359676	-0.0244353	0.046991	0.23277	0.049308	0.049308	-0.00881052
98	0.086635	0.00763136	-0.0181805	0.151989	0.126534	-0.0522054	0.0324801	-0.0433549	0.106691	0.115405	0.134442	0.0659147	0.045031	0.171346	0.0210894	0.0560704	-0.00239131	0.12944	-0.0489766	0.0205461	0.00234414	0.12944	0.21525	0.086635	0.00763136	-0.0181805	0.151989	0.126534	-0.0522054	0.0324801	-0.0433549	0.106691	0.115405	0.134442	0.0659147	0.045031	0.171346	0.0210894	0.0560704	-0.00239131	0.12944	-0.0489766	0.0205461	0.00234414	0.12944	0.21525	0.0693863	0.0693863	-0.00663255
99	0.0820832	0.034614	-0.0154353	0.0874466	0.108095	-0.0962926	-0.00658235	-0.00486152	0.118496	0.153746	0.163168	0.207834	0.0879995	0.132178	0.030325	0.0338601	0.0696952	0.0702414	0.0145239	0.104787	0.0306566	0.0702414	0.208097	0.0820832	0.034614	-0.0154353	0.0874466	0.108095	-0.0962926	-0.00658235	-0.00486152	0.118496	0.153746	0.163168	0.207834	0.0879995	0.132178	0.030325	0.0338601	0.0696952	0.0702414	0.0145239	0.104787	0.0306566	0.0702414	0.208097	0.0304338	0.0304338	-0.0115387
100	0.0862727	0.0670211	0.0114368	0.115915	0.183826	-0.138844	0.0211342	0.051108	0.134198	-0.0930898	0.222359	0.0389729	0.0445542	0.191679	0.0549429	0.0524745	-0.0463429	0.0878117	0.0661045	0.0465241	0.0189323	0.0878117	0.265261	0.0862727	0.0670211	0.0114368	0.115915	0.183826	-0.138844	0.0211342	0.051108	0.134198	-0.0930898	0.222359	0.0389729	0.0445542	0.191679	0.0549429	0.0524745	-0.0463429	0.0878117	0.0661045	0.0465241	0.0189323	0.0878117	0.265261	0.0605077	0.0605077	-0.00335563
101	0.0362708	0.0410484	0.0017752	0.108907	0.165571	-0.0169881	0.029702	-0.0798201	0.162194	0.13829	0.203311	0.195476	0.140686	0.133061	0.099711	0.0180788	-0.0191216	0.110024	0.0148196	0.0356772	0.0222219	0.110024	0.232111	0.0362708	0.0410484	0.0017752	0.108907	0.165571	-0.0169881	0.029702	-0.0798201	0.162194	0.13829	0.203311	0.195476	0.140686	0.133061	0.099711	0.0180788	-0.0191216	0.110024	0.0148196	0.0356772	0.0222219	0.110024	0.232111	0.0565262	0.0565262	-0.0196123
102	0.070398	0.0478485	0.0285207	0.2268	0.174413	0.0809655	0.0114674	-0.0572568	0.0745661	0.0304013	0.144725	0.220745	0.0557395	0.135577	0.0719145	0.049667	0.0861382	0.0682925	0.0836472	0.0415957	-0.010604	0.0682925	0.235997	0.070398	0.0478485	0.0285207	0.2268	0.174413	0.0809655	0.0114674	-0.0572568	0.0745661	0.0304013	0.144725	0.220745	0.0557395	0.135577	0.0719145	0.049667	0.0861382	0.0682925	0.0836472	0.0415957	-0.010604	0.0682925	0.235997	0.0476979	0.0476979	0.00336027
103	0.0677258	0.045132	-0.00669359	0.183446	0.124435	-0.0944539	0.0385502	-0.0251224	0.134791	-0.124572	0.169607	0.118515	0.131379	0.137391	0.11429	0.0607788	0.0316578	0.0710193	0.110339	0.00479204	-0.0328898	0.0710193	0.205275	0.0677258	0.045132	-0.00669359	0.183446	0.124435	-0.0944539	0.0385502	-0.0251224	0.134791	-0.124572	0.169607	0.118515	0.131379	0.137391	0.11429	0.0607788	0.0316578	0.0710193	0.110339	0.00479204	-0.0328898	0.0710193	0.205275	0.0477952	0.0477952	-0.00825181
104	0.0224908	0.018602	-0.00363753	0.157422	0.18786	0.0322918	0.0365841	-0.0218113	0.136662	0.11898	0.163555	0.224448	0.119353	0.188507	0.086623	0.0928445	0.118101	0.125534	0.110636	0.0670143	-3.35e-05	0.125534	0.262081	0.0224908	0.018602	-0.00363753	0.157422	0.18786	0.0322918	0.0365841	-0.0218113	0.136662	0.11898	0.163555	0.224448	0.119353	0.188507	0.086623	0.0928445	0.118101	0.125534	0.110636	0.0670143	-3.35e-05	0.125534	0.262081	0.0535343	0.0535343	-0.0181664
105	0.117354	0.049407	-0.0244715	0.0537084	0.124232	-0.0289293	0.0207062	-0.0299683	0.131114	-0.0205364	0.191837	0.269464	0.0656288	0.239552	0.133063	0.0906719	0.0402372	0.0716903	0.0935498	0.021666	0.0156632	0.0716903	0.0214337	0.117354	0.049407	-0.0244715	0.0537084	0.124232	-0.0289293	0.0207062	-0.0299683	0.131114	-0.0205364	0.191837	0.269464	0.0656288	0.239552	0.133063	0.0906719	0.0402372	0.0716903	0.0935498	0.021666	0.0156632	0.0716903	0.0214337	0.0675918	0.0675918	0.0236146
106	0.0970747	0.0252977	-0.0185763	0.132811	0.118853	-0.0913828	0.0203821	0.0527635	0.0680895	0.00450919	0.16119	0.106888	0.0203288	0.158743	0.137287	0.0735064	0.00688967	0.112682	0.00736694	0.0201808	0.0154321	0.112682	0.198874	0.0970747	0.0252977	-0.0185763	0.132811	0.118853	-0.0913828	0.0203821	0.0527635	0.0680895	0.00450919	0.16119	0.106888	0.0203288	0.158743	0.137287	0.0735064	0.00688967	0.112682	0.00736694	0.0201808	0.0154321	0.112682	0.198874	0.0578746	0.0578746	-0.0158221
107	0.173119	0.090225	0.0215972	0.178828	0.218605	0.035666	0.0283323	-0.211	0.0777529	0.112529	0.142728	0.198415	0.0940664	0.1861	0.102417	0.0577385	0.0557196	0.188772	0.0230005	0.0336	0.0798009	0.188772	0.255946	0.173119	0.090225	0.0215972	0.178828	0.218605	0.035666	0.0283323	-0.211	0.0777529	0.112529	0.142728	0.198415	0.0940664	0.1861	0.102417	0.0577385	0.0557196	0.188772	0.0230005	0.0336	0.0798009	0.188772	0.255946	0.089904	0.089904	-0.00414891
108	0.111376	0.0181058	-0.0283571	0.129171	0.144422	-0.00199604	0.026055	-0.00409406	0.189262	0.0935115	0.215315	-0.0846606	0.140362	0.174632	0.0623878	0.0449976	0.00367358	0.138492	0.101029	0.00364046	-0.00760544	0.138492	0.151818	0.111376	0.0181058	-0.0283571	0.129171	0.144422	-0.00199604	0.026055	-0.00409406	0.189262	0.0935115	0.215315	-0.0846606	0.140362	0.174632	0.0623878	0.0449976	0.00367358	0.138492	0.101029	0.00364046	-0.00760544	0.138492	0.151818	0.0773257	0.0773257	-0.0119168
109	0.117965	-0.0393772	0.00603309	0.140852	0.10021	-0.0463863	0.0510388	0.00788922	0.129747	0.111537	0.182016	0.263196	0.0443618	0.175677	0.0461193	0.0291907	-0.0156182	0.152729	0.0873338	0.0101943	0.0434846	0.152729	0.249637	0.117965	-0.0393772	0.00603309	0.140852	0.10021	-0.0463863	0.0510388	0.00788922	0.129747	0.111537	0.182016	0.263196	0.0443618	0.175677	0.0461193	0.0291907	-0.0156182	0.152729	0.0873338	0.0101943	0.0434846	0.152729	0.249637	0.0227862	0.0227862	-0.0158221
110	0.036033	-0.0107837	0.00985724	0.0910866	0.0971338	-0.0846545	0.0170966	-0.0256377	0.0741275	0.0986637	0.159817	0.321513	0.0772251	0.0708611	0.070858	0.0424496	0.0528896	0.129641	0.101083	0.0766452	0.0959186	0.129641	0.193046	0.036033	-0.0107837	0.00985724	0.0910866	0.0971338	-0.0846545	0.0170966	-0.0256377	0.0741275	0.0986637	0.159817	0.321513	0.0772251	0.0708611	0.070858	0.0424496	0.0528896	0.129641	0.101083	0.0766452	0.0959186	0.129641	0.193046	0.116312	0.116312	0.000707461
111	0.0462576	0.0711482	-0.0218203	0.0945094	0.104448	-0.10486	0.000572074	-0.0492205	0.147757	0.00150255	0.250885	0.291242	0.10061	0.193333	0.119391	0.0282598	0.00501558	0.108438	0.0544803	0.0223648	0.0208682	0.108438	0.298896	0.0462576	0.0711482	-0.0218203	0.0945094	0.104448	-0.10486	0.000572074	-0.0492205	0.147757	0.00150255	0.250885	0.291242	0.10061	0.193333	0.119391	0.0282598	0.00501558	0.108438	0.0544803	0.0223648	0.0208682	0.108438	0.298896	0.12723	0.12723	-0.00858448
112	0.112066	0.0848876	-0.0176311	0.108961	0.0929163	-0.120175	0.042552	0.0642424	0.109207	-0.155616	0.184724	0.100246	0.0224864	0.161075	0.10284	0.0687979	-0.0111402	0.128397	-0.00151166	0.07784	-0.0052484	0.128397	0.237361	0.112066	0.0848876	-0.0176311	0.108961	0.0929163	-0.120175	0.042552	0.0642424	0.109207	-0.155616	0.184724	0.100246	0.0224864	0.161075	0.10284	0.0687979	-0.0111402	0.128397	-0.00151166	0.07784	-0.0052484	0.128397	0.237361	0.076685	0.076685	0.00453313
113	0.136297	-0.0242272	-0.0183323	0.175296	0.130385	-0.111891	0.00357064	-0.0473128	0.0842295	0.0641749	0.208508	0.0987678	0.0252287	0.157267	0.123333	0.0466011	0.0648499	0.157272	0.11174	0.0614823	0.0100165	0.157272	0.315711	0.136297	-0.0242272	-0.0183323	0.175296	0.130385	-0.111891	0.00357064	-0.0473128	0.0842295	0.0641749	0.208508	0.0987678	0.0252287	0.157267	0.123333	0.0466011	0.0648499	0.157272	0.11174	0.0614823	0.0100165	0.157272	0.315711	0.0735623	0.0735623	-0.00951708
114	0.0711566	0.0245489	0.016479	0.109069	0.171337	-0.0733196	-0.0109667	-0.198381	0.157524	0.129854	0.156598	0.142875	0.0806814	0.141404	0.0309786	0.0562251	0.0553193	0.15599	0.130359	-0.0199276	0.0087228	0.15599	0.13664	0.0711566	0.0245489	0.016479	0.109069	0.171337	-0.0733196	-0.0109667	-0.198381	0.157524	0.129854	0.156598	0.142875	0.0806814	0.141404	0.0309786	0.0562251	0.0553193	0.15599	0.130359	-0.0199276	0.0087228	0.15599	0.13664	0.0654384	0.0654384	-0.0280256
115	0.132198	0.0200648	0.024637	0.126944	0.0611936	-0.111891	0.0335563	-0.0345621	0.130792	0.0296861	0.185985	0.181997	0.0859922	0.215616	0.128364	0.0580237	-0.00329068	0.142732	0.0707052	0.109909	0.0325325	0.142732	0.287066	0.132198	0.0200648	0.024637	0.126944	0.0611936	-0.111891	0.0335563	-0.0345621	0.130792	0.0296861	0.185985	0.181997	0.0859922	0.215616	0.128364	0.0580237	-0.00329068	0.142732	0.0707052	0.109909	0.0325325	0.142732	0.287066	0.069336	0.069336	-0.00619894
116	0.0963161	0.0108007	0.0328961	0.210067	0.222273	-0.0362839	0.0188504	-0.145986	0.0908738	0.0239648	0.160079	0.181623	0.0367829	0.241976	0.0615327	0.0583076	0.0740178	0.0360197	0.0810386	0.0283372	0.0434246	0.0360197	0.259918	0.0963161	0.0108007	0.0328961	0.210067	0.222273	-0.0362839	0.0188504	-0.145986	0.0908738	0.0239648	0.160079	0.181623	0.0367829	0.241976	0.0615327	0.0583076	0.0740178	0.0360197	0.0810386	0.0283372	0.0434246	0.0360197	0.259918	0.0562814	0.0562814	0.00336027
117	0.119754	0.0749269	0.0233701	0.104886	0.18401	0.0255635	0.015808	0.0706123	0.0718826	-0.0555944	0.260125	0.158011	0.00143543	0.191179	0.0577187	0.0515557	0.00570306	0.149395	-0.00622048	0.0219774	-0.00963187	0.149395	0.249811	0.119754	0.0749269	0.0233701	0.104886	0.18401	0.0255635	0.015808	0.0706123	0.0718826	-0.0555944	0.260125	0.158011	0.00143543	0.191179	0.0577187	0.0515557	0.00570306	0.149395	-0.00622048	0.0219774	-0.00963187	0.149395	0.249811	0.0551946	0.0551946	-0.0166211
118	0.101966	0.0153805	0.00163243	0.0978234	0.21726	-0.249345	0.0739219	-0.066554	0.0759466	-0.00909366	0.160809	0.0546606	0.069388	0.265412	0.0986747	0.0235514	0.0791504	0.152255	0.0333592	0.0572748	0.0584082	0.152255	0.333145	0.101966	0.0153805	0.00163243	0.0978234	0.21726	-0.249345	0.0739219	-0.066554	0.0759466	-0.00909366	0.160809	0.0546606	0.069388	0.265412	0.0986747	0.0235514	0.0791504	0.152255	0.0333592	0.0572748	0.0584082	0.152255	0.333145	0.0474195	0.0474195	-0.0075552
119	0.080079	0.0446792	0.0240116	0.144546	0.134622	-0.083422	0.0320019	0.150033	0.177947	-0.010378	0.192261	0.12774	0.0300021	0.296195	0.102267	0.0452949	0.0533652	0.10457	-0.0409308	0.0304144	0.0161245	0.10457	0.27091	0.080079	0.0446792	0.0240116	0.144546	0.134622	-0.083422	0.0320019	0.150033	0.177947	-0.010378	0.192261	0.12774	0.0300021	0.296195	0.102267	0.0452949	0.0533652	0.10457	-0.0409308	0.0304144	0.0161245	0.10457	0.27091	0.0606049	0.0606049	0.0228768
120	0.0870539	0.0384886	-0.0150124	0.0528934	0.10021	-0.0206654	0.0455652	0.0365811	0.08561	0.0498569	0.186883	0.263748	0.0160744	0.212056	0.120185	0.0429541	0.081161	0.00105005	0.0374767	0.0345036	0.0371759	0.00105005	0.213879	0.0870539	0.0384886	-0.0150124	0.0528934	0.10021	-0.0206654	0.0455652	0.0365811	0.08561	0.0498569	0.186883	0.263748	0.0160744	0.212056	0.120185	0.0429541	0.081161	0.00105005	0.0374767	0.0345036	0.0371759	0.00105005	0.213879	0.0918461	0.0918461	-0.0141972
121	0.111217	-0.0145103	-0.0138304	0.0819051	0.124619	-0.104253	0.0339615	-0.0553382	0.148467	0.109391	0.206331	0.122397	0.0982787	0.132722	0.063675	0.0297477	0.00373479	0.0537866	0.0993619	0.0236029	0.0473763	0.0537866	0.238818	0.111217	-0.0145103	-0.0138304	0.0819051	0.124619	-0.104253	0.0339615	-0.0553382	0.148467	0.109391	0.206331	0.122397	0.0982787	0.132722	0.063675	0.0297477	0.00373479	0.0537866	0.0993619	0.0236029	0.0473763	0.0537866	0.238818	0.0890017	0.0890017	-0.0221272
122	0.142242	0.0313925	0.00869156	0.107983	-0.00109056	-0.194873	0.0138549	0.0711276	0.13452	0.0733262	0.22591	0.209686	0.0662347	0.225269	0.0771567	0.0381165	0.00964901	0.186784	0.0373144	-0.0176244	0.00539284	0.186784	0.245306	0.142242	0.0313925	0.00869156	0.107983	-0.00109056	-0.194873	0.0138549	0.0711276	0.13452	0.0733262	0.22591	0.209686	0.0662347	0.225269	0.0771567	0.0381165	0.00964901	0.186784	0.0373144	-0.0176244	0.00539284	0.186784	0.245306	0.0873883	0.0873883	-0.00840393
123	0.0686656	-0.027144	0.00602405	0.0751139	0.122316	-0.0169881	0.0590701	-0.0135228	0.154066	0.159322	0.18961	0.0334352	0.0624334	0.271196	0.0716124	0.00817099	0.102638	0.0761309	0.0266853	0.0535518	0.0474767	0.0761309	0.232996	0.0686656	-0.027144	0.00602405	0.0751139	0.122316	-0.0169881	0.0590701	-0.0135228	0.154066	0.159322	0.18961	0.0334352	0.0624334	0.271196	0.0716124	0.00817099	0.102638	0.0761309	0.0266853	0.0535518	0.0474767	0.0761309	0.232996	0.0985042	0.0985042	-0.000401431
124	0.114353	0.0549969	-0.0125889	0.139222	0.0975209	-0.0341421	0.0729932	-0.0196405	0.204086	0.0999481	0.160042	0.191968	0.0529761	0.301909	0.120678	0.0965965	0.0270856	0.103895	0.151211	0.0788406	0.0446582	0.103895	0.12463	0.114353	0.0549969	-0.0125889	0.139222	0.0975209	-0.0341421	0.0729932	-0.0196405	0.204086	0.0999481	0.160042	0.191968	0.0529761	0.301909	0.120678	0.0965965	0.0270856	0.103895	0.151211	0.0788406	0.0446582	0.103895	0.12463	0.0733141	0.0733141	-0.0118386
125	0.107605	0.0535341	-0.0117286	0.151011	0.233988	-0.142522	0.0523646	0.0678056	0.0870291	0.0259643	0.18269	0.0278974	0.0740955	0.21505	0.0969444	0.0182349	0.0431236	0.203478	0.117254	0.0468683	0.0311484	0.203478	0.295982	0.107605	0.0535341	-0.0117286	0.151011	0.233988	-0.142522	0.0523646	0.0678056	0.0870291	0.0259643	0.18269	0.0278974	0.0740955	0.21505	0.0969444	0.0182349	0.0431236	0.203478	0.117254	0.0468683	0.0311484	0.203478	0.295982	0.0930133	0.0930133	0.01545
126	0.0394865	0.0155372	0.0154651	0.110047	0.173435	-0.145269	0.0194323	0.021528	0.0932865	0.0627446	0.163168	0.0978422	0.0317935	0.279605	0.128736	0.033848	0.0647745	0.104066	0.0403809	0.0929278	0.0390313	0.104066	0.36338	0.0394865	0.0155372	0.0154651	0.110047	0.173435	-0.145269	0.0194323	0.021528	0.0932865	0.0627446	0.163168	0.0978422	0.0317935	0.279605	0.128736	0.033848	0.0647745	0.104066	0.0403809	0.0929278	0.0390313	0.104066	0.36338	0.071704	0.071704	0.00395594
127	0.110583	0.127569	0.0193164	0.225985	0.228222	-0.0555796	0.0243532	-0.0759937	0.0886806	0.0670356	0.160934	0.113351	-0.0412987	0.144033	0.150919	0.0556951	0.011104	0.0586675	0.080231	0.0682197	0.0338764	0.0586675	0.313768	0.110583	0.127569	0.0193164	0.225985	0.228222	-0.0555796	0.0243532	-0.0759937	0.0886806	0.0670356	0.160934	0.113351	-0.0412987	0.144033	0.150919	0.0556951	0.011104	0.0586675	0.080231	0.0682197	0.0338764	0.0586675	0.313768	0.107943	0.107943	-0.00893989
128	0.095648	0.0436692	-0.033356	0.175568	0.187473	0.0977963	0.02641	-0.146742	0.0924091	0.0116609	0.156854	0.177206	0.113458	0.208404	0.0750638	0.0708549	0.0565059	0.123384	0.0483185	0.0247651	0.0156327	0.123384	0.239923	0.095648	0.0436692	-0.033356	0.175568	0.187473	0.0977963	0.02641	-0.146742	0.0924091	0.0116609	0.156854	0.177206	0.113458	0.208404	0.0750638	0.0708549	0.0565059	0.123384	0.0483185	0.0247651	0.0156327	0.123384	0.239923	0.0813709	0.0813709	0.001478
129	0.127035	0.0653581	-0.00981833	0.158509	0.0717678	-0.0451538	0.0280519	0.0688252	0.0886806	0.150463	0.176944	0.164474	0.102683	0.177509	0.093535	0.0338991	0.0428976	0.0503204	0.0757908	0.0664327	0.0185416	0.0503204	0.235066	0.127035	0.0653581	-0.00981833	0.158509	0.0717678	-0.0451538	0.0280519	0.0688252	0.0886806	0.150463	0.176944	0.164474	0.102683	0.177509	0.093535	0.0338991	0.0428976	0.0503204	0.0757908	0.0664327	0.0185416	0.0503204	0.235066	0.0627584	0.0627584	0.00838298
130	0.0702734	0.0164427	0.00113362	0.154869	0.126534	0.0451421	0.0486967	-0.131448	0.0749016	0.162766	0.151862	0.155428	0.0860791	0.23792	0.107789	0.0406255	0.0167122	0.0197615	0.129068	0.0886763	0.0674951	0.0197615	0.291611	0.0702734	0.0164427	0.00113362	0.154869	0.126534	0.0451421	0.0486967	-0.131448	0.0749016	0.162766	0.151862	0.155428	0.0860791	0.23792	0.107789	0.0406255	0.0167122	0.0197615	0.129068	0.0886763	0.0674951	0.0197615	0.291611	0.0475336	0.0475336	-0.0268542
131	0.13666	0.032594	0.0101446	0.252063	0.0806102	0.0399495	0.0234925	-0.0140381	0.118548	0.0478573	0.157203	0.172594	0.0831629	0.281258	0.102489	0.0214689	0.0527342	0.0400543	0.0472693	0.0242268	0.00557295	0.0400543	0.280179	0.13666	0.032594	0.0101446	0.252063	0.0806102	0.0399495	0.0234925	-0.0140381	0.118548	0.0478573	0.157203	0.172594	0.0831629	0.281258	0.102489	0.0214689	0.0527342	0.0400543	0.0472693	0.0242268	0.00557295	0.0400543	0.280179	0.0673805	0.0673805	-0.0141417
132	0.0991128	0.0782443	-0.00778337	0.158454	0.128469	-0.00781507	0.0527407	-0.0586602	0.0744629	0.0553009	0.17038	0.0465407	0.0883025	0.186331	0.144038	0.0740243	0.0539585	-0.00234776	0.0120217	0.0544555	0.0250099	-0.00234776	0.164753	0.0991128	0.0782443	-0.00778337	0.158454	0.128469	-0.00781507	0.0527407	-0.0586602	0.0744629	0.0553009	0.17038	0.0465407	0.0883025	0.186331	0.144038	0.0740243	0.0539585	-0.00234776	0.0120217	0.0544555	0.0250099	-0.00234776	0.164753	0.0544399	0.0544399	0.0204941
133	0.157731	0.075223	0.0348046	0.137918	0.0830959	-0.173738	0.019536	0.144551	0.221206	0.0182434	0.138467	0.045615	0.0422017	0.242224	0.0693291	0.0192183	-0.00706241	0.136206	0.127049	0.0151333	0.0425816	0.136206	0.230122	0.157731	0.075223	0.0348046	0.137918	0.0830959	-0.173738	0.019536	0.144551	0.221206	0.0182434	0.138467	0.045615	0.0422017	0.242224	0.0693291	0.0192183	-0.00706241	0.136206	0.127049	0.0151333	0.0425816	0.136206	0.230122	0.0654887	0.0654887	-0.0329829
134	0.136931	0.0313925	0.012485	0.115589	0.0927126	-0.0727134	0.0425812	0.180885	0.128972	0.0993789	0.193453	0.0662883	0.0248415	0.14281	0.103153	0.0546861	0.0423608	0.0931969	0.0744459	0.0575652	-0.024826	0.0931969	0.253211	0.136931	0.0313925	0.012485	0.115589	0.0927126	-0.0727134	0.0425812	0.180885	0.128972	0.0993789	0.193453	0.0662883	0.0248415	0.14281	0.103153	0.0546861	0.0423608	0.0931969	0.0744459	0.0575652	-0.024826	0.0931969	0.253211	0.0446221	0.0446221	-0.006951
135	0.105091	0.0775913	-6.75e-06	0.212946	0.186312	-0.0916859	0.0336811	0.0559539	0.123657	-0.0364161	0.186677	0.166683	0.0830338	0.256099	0.106281	0.0468083	0.0238695	0.142531	0.0378787	0.0800999	0.00840123	0.142531	0.216574	0.105091	0.0775913	-6.75e-06	0.212946	0.186312	-0.0916859	0.0336811	0.0559539	0.123657	-0.0364161	0.186677	0.166683	0.0830338	0.256099	0.106281	0.0468083	0.0238695	0.142531	0.0378787	0.0800999	0.00840123	0.142531	0.216574	0.0415329	0.0415329	0.00482884
136	0.161185	0.0383319	-0.018307	0.151174	-0.0268436	-0.0387287	0.0180027	-0.0343099	0.162955	0.111537	0.154258	0.0565119	0.069388	0.262466	0.144812	0.099209	0.0230454	0.0761651	0.100599	0.0508613	0.00714787	0.0761651	0.272101	0.161185	0.0383319	-0.018307	0.151174	-0.0268436	-0.0387287	0.0180027	-0.0343099	0.162955	0.111537	0.154258	0.0565119	0.069388	0.262466	0.144812	0.099209	0.0230454	0.0761651	0.100599	0.0508613	0.00714787	0.0761651	0.272101	0.0428645	0.0428645	-0.0216339
137	0.0920926	0.092184	-0.018551	0.142264	0.13615	-0.171293	0.0797505	-0.0513913	0.0697925	-0.146596	0.184649	0.0915736	0.00672517	0.280127	0.100315	0.0391901	0.0451531	0.15034	-0.00361188	0.0810688	0.0508263	0.15034	0.267157	0.0920926	0.092184	-0.018551	0.142264	0.13615	-0.171293	0.0797505	-0.0513913	0.0697925	-0.146596	0.184649	0.0915736	0.00672517	0.280127	0.100315	0.0391901	0.0451531	0.15034	-0.00361188	0.0810688	0.0508263	0.15034	0.267157	0.0670182	0.0670182	-0.0212415
138	0.0832042	-0.026996	-0.0193968	0.200125	0.180363	-0.0696625	0.0135599	0.0160462	0.0154379	-0.120558	0.246418	0.0703482	0.10439	0.219467	0.148998	0.0761323	0.0509166	0.0551671	0.113245	0.0735143	0.0168565	0.0551671	0.267204	0.0832042	-0.026996	-0.0193968	0.200125	0.180363	-0.0696625	0.0135599	0.0160462	0.0154379	-0.120558	0.246418	0.0703482	0.10439	0.219467	0.148998	0.0761323	0.0509166	0.0551671	0.113245	0.0735143	0.0168565	0.0551671	0.267204	0.0760444	0.0760444	-0.0187905
139	0.123423	0.0305305	-0.0247336	0.222291	0.0523511	0.00412607	0.05011	-0.0953665	0.0456406	0.0834845	0.145548	0.0293752	0.0953414	0.286677	0.113262	0.06572	0.0444656	0.0881451	0.00123214	0.0436836	-0.0201522	0.0881451	0.23595	0.123423	0.0305305	-0.0247336	0.222291	0.0523511	0.00412607	0.05011	-0.0953665	0.0456406	0.0834845	0.145548	0.0293752	0.0953414	0.286677	0.113262	0.06572	0.0444656	0.0881451	0.00123214	0.0436836	-0.0201522	0.0881451	0.23595	0.0854831	0.0854831	-0.00100563
140	0.123491	0.0601775	0.0195188	0.142753	0.243217	-0.00720892	0.0426914	-0.06082	0.101582	-0.00694815	0.183165	-0.0128807	0.106614	0.186988	0.135156	0.0720454	0.0112735	0.0439607	-0.00339555	0.0706411	0.0251209	0.0439607	0.280092	0.123491	0.0601775	0.0195188	0.142753	0.243217	-0.00720892	0.0426914	-0.06082	0.101582	-0.00694815	0.183165	-0.0128807	0.106614	0.186988	0.135156	0.0720454	0.0112735	0.0439607	-0.00339555	0.0706411	0.0251209	0.0439607	0.280092	0.0860567	0.0860567	-0.000843565
141	0.153904	0.00496705	0.0155917	0.125205	0.0292875	-0.0607723	0.0378581	0.00584998	0.185585	0.0746106	-0.00429949	0.0727517	0.0789954	0.21183	0.144038	0.117603	0.0245381	0.107361	0.0876042	0.0306297	0.0514177	0.107361	0.228798	0.153904	0.00496705	0.0155917	0.125205	0.0292875	-0.0607723	0.0378581	0.00584998	0.185585	0.0746106	-0.00429949	0.0727517	0.0789954	0.21183	0.144038	0.117603	0.0245381	0.107361	0.0876042	0.0306297	0.0514177	0.107361	0.228798	0.0784628	0.0784628	-0.00405651
142	0.0451932	-0.00339156	0.0172905	0.210827	0.111559	-0.0270906	0.0461471	-0.10621	0.140507	0.0497255	0.00885281	0.0642583	0.0425257	0.220172	0.144662	0.0912154	0.0403878	0.0180476	0.0686067	0.0468471	0.0332744	0.0180476	0.325599	0.0451932	-0.00339156	0.0172905	0.210827	0.111559	-0.0270906	0.0461471	-0.10621	0.140507	0.0497255	0.00885281	0.0642583	0.0425257	0.220172	0.144662	0.0912154	0.0403878	0.0180476	0.0686067	0.0468471	0.0332744	0.0180476	0.325599	0.0472854	0.0472854	5.21e-05
143	0.15147	0.13039	0.0236827	0.186651	0.0367852	-0.195176	0.00340045	0.02485	0.0256044	-0.0176757	0.000198999	0.143054	0.104216	0.19483	0.13756	0.0966476	0.0151206	0.0748188	0.199321	0.152115	0.00839136	0.0748188	0.238911	0.15147	0.13039	0.0236827	0.186651	0.0367852	-0.195176	0.00340045	0.02485	0.0256044	-0.0176757	0.000198999	0.143054	0.104216	0.19483	0.13756	0.0966476	0.0151206	0.0748188	0.199321	0.152115	0.00839136	0.0748188	0.238911	0.0669679	0.0669679	4.64e-05
144	0.111523	0.0094424	0.00325353	0.14623	0.0346663	-0.0923122	0.0470969	0.0655142	0.199364	0.00964675	0.0249188	0.0930514	0.0952756	0.226405	0.0835249	0.0448038	0.10009	0.0317756	0.0800687	0.0773123	-0.00360356	0.0317756	0.265082	0.111523	0.0094424	0.00325353	0.14623	0.0346663	-0.0923122	0.0470969	0.0655142	0.199364	0.00964675	0.0249188	0.0930514	0.0952756	0.226405	0.0835249	0.0448038	0.10009	0.0317756	0.0800687	0.0773123	-0.00360356	0.0317756	0.265082	0.0659147	0.0659147	-0.0217575
145	0.130919	0.0288239	-0.00122123	0.142645	0.18075	-0.122317	0.0295253	0.0219117	0.0868098	0.108953	-0.0105762	0.18846	0.0819985	0.274843	0.120456	0.0974884	0.066611	0.0561074	0.0942492	0.0832528	0.0293432	0.0561074	0.354291	0.130919	0.0288239	-0.00122123	0.142645	0.18075	-0.122317	0.0295253	0.0219117	0.0868098	0.108953	-0.0105762	0.18846	0.0819985	0.274843	0.120456	0.0974884	0.066611	0.0561074	0.0942492	0.0832528	0.0293432	0.0561074	0.354291	0.0870261	0.0870261	-0.0230825
146	0.0869067	0.0280664	0.0287159	0.183935	0.0948315	-0.0766938	0.0665552	-0.000772072	0.0280686	0.0555929	0.0208945	-0.046286	0.0860791	0.264916	0.147973	0.0737014	0.0639128	0.0896623	0.0857204	0.0597712	0.0072885	0.0896623	0.269054	0.0869067	0.0280664	0.0287159	0.183935	0.0948315	-0.0766938	0.0665552	-0.000772072	0.0280686	0.0555929	0.0208945	-0.046286	0.0860791	0.264916	0.147973	0.0737014	0.0639128	0.0896623	0.0857204	0.0597712	0.0072885	0.0896623	0.269054	0.0878814	0.0878814	-0.00501612
147	0.168681	-0.00846768	0.00632767	0.179588	0.0758019	-0.0696625	0.0620606	0.102615	0.205892	0.0471422	-0.0392142	0.214298	0.0663427	0.259859	0.148687	0.0231895	0.0688147	0.154913	0.0798271	0.0202876	0.00945475	0.154913	0.345108	0.168681	-0.00846768	0.00632767	0.179588	0.0758019	-0.0696625	0.0620606	0.102615	0.205892	0.0471422	-0.0392142	0.214298	0.0663427	0.259859	0.148687	0.0231895	0.0688147	0.154913	0.0798271	0.0202876	0.00945475	0.154913	0.345108	0.0510522	0.0510522	-0.0049422
148	0.114648	0.0174963	0.00658069	0.204091	0.148457	0.00473221	0.0597184	-0.0494726	0.150828	0.0501488	0.0197216	0.0507955	0.0785212	0.237737	0.133867	0.0603901	-0.000686736	0.0474953	0.103478	0.0783244	0.0620392	0.0474953	0.328999	0.114648	0.0174963	0.00658069	0.204091	0.148457	0.00473221	0.0597184	-0.0494726	0.150828	0.0501488	0.0197216	0.0507955	0.0785212	0.237737	0.133867	0.0603901	-0.000686736	0.0474953	0.103478	0.0783244	0.0620392	0.0474953	0.328999	0.0724587	0.0724587	-0.0145384
149	0.129345	0.0132212	0.0273641	0.225442	0.231685	-0.148017	0.0358758	0.0871894	0.0936219	-0.00823254	-0.0523853	-0.0102986	0.143515	0.187667	0.0902649	0.035917	0.0522351	0.163935	0.134072	0.101547	-0.0111764	0.163935	0.328247	0.129345	0.0132212	0.0273641	0.225442	0.231685	-0.148017	0.0358758	0.0871894	0.0936219	-0.00823254	-0.0523853	-0.0102986	0.143515	0.187667	0.0902649	0.035917	0.0522351	0.163935	0.134072	0.101547	-0.0111764	0.163935	0.328247	0.0676421	0.0676421	0.0153619
150	0.0989543	0.0719579	0.0224321	0.1013	0.00679428	-0.0206654	0.0506336	-0.166378	0.11909	0.110252	-0.0627237	0.0199724	0.0892745	0.196958	0.0876282	0.0853164	0.0484869	0.181266	0.171231	0.0793789	0.0557707	0.181266	0.245086	0.0989543	0.0719579	0.0224321	0.1013	0.00679428	-0.0206654	0.0506336	-0.166378	0.11909	0.110252	-0.0627237	0.0199724	0.0892745	0.196958	0.0876282	0.0853164	0.0484869	0.181266	0.171231	0.0793789	0.0557707	0.181266	0.245086	0.103042	0.103042	-0.00697801
151	0.171477	0.0536821	0.0235562	0.185347	0.102513	-0.0515992	0.0537278	-0.0366013	0.142919	-0.0800708	0.0102629	-0.0138064	0.074957	0.196528	0.0790573	0.0867787	0.0927964	0.0722288	-0.00977192	0.0533471	0.0635837	0.0722288	0.266758	0.171477	0.0536821	0.0235562	0.185347	0.102513	-0.0515992	0.0537278	-0.0366013	0.142919	-0.0800708	0.0102629	-0.0138064	0.074957	0.196528	0.0790573	0.0867787	0.0927964	0.0722288	-0.00977192	0.0533471	0.0635837	0.0722288	0.266758	0.0960053	0.0960053	-0.000516585
152	0.0571615	0.034257	0.0177116	0.235275	0.119627	-0.185679	0.0378807	0.129257	0.151163	0.0119382	0.0192661	0.104679	0.1116	0.190226	0.110587	0.0502105	0.0222214	0.0473585	0.0727783	0.0822848	0.0392319	0.0473585	0.278063	0.0571615	0.034257	0.0177116	0.235275	0.119627	-0.185679	0.0378807	0.129257	0.151163	0.0119382	0.0192661	0.104679	0.1116	0.190226	0.110587	0.0502105	0.0222214	0.0473585	0.0727783	0.0822848	0.0392319	0.0473585	0.278063	0.0627751	0.0627751	0.00405262
153	0.134236	0.0305305	0.00704515	0.155575	0.175554	-0.033536	0.0334672	0.0995564	0.0739082	0.0744792	-0.00582186	0.0790202	0.0807867	0.265347	0.151765	0.0291517	0.0780956	0.0487732	0.0591891	0.0518946	0.0401851	0.0487732	0.283579	0.134236	0.0305305	0.00704515	0.155575	0.175554	-0.033536	0.0334672	0.0995564	0.0739082	0.0744792	-0.00582186	0.0790202	0.0807867	0.265347	0.151765	0.0291517	0.0780956	0.0487732	0.0591891	0.0518946	0.0401851	0.0487732	0.283579	0.0891828	0.0891828	0.001242
154	0.100721	0.0868554	0.00186014	0.12439	0.199963	0.106686	0.0784311	0.0516233	0.206279	0.127125	0.0111738	0.222044	0.0979968	0.215546	0.115608	0.0628479	-0.0194653	0.0751565	0.0240227	0.0615582	0.0833216	0.0751565	0.17301	0.100721	0.0868554	0.00186014	0.12439	0.199963	0.106686	0.0784311	0.0516233	0.206279	0.127125	0.0111738	0.222044	0.0979968	0.215546	0.115608	0.0628479	-0.0194653	0.0751565	0.0240227	0.0615582	0.0833216	0.0751565	0.17301	0.0426834	0.0426834	0.0159064
155	0.0931004	0.14453	0.0157778	0.177687	0.215916	0.0280083	0.0375566	-0.0257692	0.0199405	0.138728	-0.0117117	0.0485706	0.0821039	0.2879	0.16425	0.116465	0.0662672	0.203611	0.0693062	0.0595559	0.0126342	0.203611	0.279913	0.0931004	0.14453	0.0157778	0.177687	0.215916	0.0280083	0.0375566	-0.0257692	0.0199405	0.138728	-0.0117117	0.0485706	0.0821039	0.2879	0.16425	0.116465	0.0662672	0.203611	0.0693062	0.0595559	0.0126342	0.203611	0.279913	0.0758968	0.0758968	-0.00364991
156	0.119777	0.0716009	0.00221436	0.154869	0.0973171	-0.236495	0.0832499	0.0944583	0.106033	-0.0122463	0.020071	0.273898	0.10536	0.286698	0.11936	0.0112624	0.0435851	0.173625	0.168298	0.063721	0.0471756	0.173625	0.332	0.119777	0.0716009	0.00221436	0.154869	0.0973171	-0.236495	0.0832499	0.0944583	0.106033	-0.0122463	0.020071	0.273898	0.10536	0.286698	0.11936	0.0112624	0.0435851	0.173625	0.168298	0.063721	0.0471756	0.173625	0.332	0.0662937	0.0662937	-0.0160951
157	0.113867	0.0885097	0.00264629	0.297265	0.115593	-0.0387287	0.0619276	0.157434	0.0490983	-0.0468664	0.0143246	0.124232	0.0850412	0.325232	0.0977702	0.075305	0.0226264	0.0766695	0.153228	0.0746006	0.0565726	0.0766695	0.286887	0.113867	0.0885097	0.00264629	0.297265	0.115593	-0.0387287	0.0619276	0.157434	0.0490983	-0.0468664	0.0143246	0.124232	0.0850412	0.325232	0.0977702	0.075305	0.0226264	0.0766695	0.153228	0.0746006	0.0565726	0.0766695	0.286887	0.0734147	0.0734147	-0.00499338
158	0.0850498	0.0552494	0.0156766	0.224355	0.173252	0.0139255	0.063166	0.0336429	0.0847843	0.0147989	-0.00376915	0.0387943	0.0656947	0.278064	0.102187	0.0878644	0.0924903	0.124995	0.00750214	0.055187	0.0369349	0.124995	0.26226	0.0850498	0.0552494	0.0156766	0.224355	0.173252	0.0139255	0.063166	0.0336429	0.0847843	0.0147989	-0.00376915	0.0387943	0.0656947	0.278064	0.102187	0.0878644	0.0924903	0.124995	0.00750214	0.055187	0.0369349	0.124995	0.26226	0.0603903	0.0603903	0.0110415
159	0.136173	-0.0151633	-0.0114738	0.145959	0.0577299	-0.0580244	0.0407837	0.0188529	0.0734179	0.133707	0.0262353	0.0280923	0.0987107	0.228241	0.151454	0.0737014	0.0350669	0.201358	0.0559604	0.0258628	0.0458516	0.201358	0.368058	0.136173	-0.0151633	-0.0114738	0.145959	0.0577299	-0.0580244	0.0407837	0.0188529	0.0734179	0.133707	0.0262353	0.0280923	0.0987107	0.228241	0.151454	0.0737014	0.0350669	0.201358	0.0559604	0.0258628	0.0458516	0.201358	0.368058	0.0249262	0.0249262	-6.45e-05
160	0.0676352	0.0241396	0.0349564	0.21387	0.127125	-0.172506	0.0406881	-0.0942263	0.0894547	-0.0640451	0.005415	0.145279	0.150467	0.311701	0.178505	0.0991834	0.0431472	0.148656	-0.0323749	0.0672181	0.0349899	0.148656	0.23255	0.0676352	0.0241396	0.0349564	0.21387	0.127125	-0.172506	0.0406881	-0.0942263	0.0894547	-0.0640451	0.005415	0.145279	0.150467	0.311701	0.178505	0.0991834	0.0431472	0.148656	-0.0323749	0.0672181	0.0349899	0.148656	0.23255	0.0984069	0.0984069	-0.00968768
161	0.0776786	-0.0286067	-0.0456182	0.211262	0.176125	-0.0711778	0.0287084	-0.0583971	0.0461825	-0.182807	0.0188418	0.20267	0.0746566	0.289462	0.107409	0.0882397	0.0955746	0.165585	0.0682029	0.113579	0.0497325	0.165585	0.272633	0.0776786	-0.0286067	-0.0456182	0.211262	0.176125	-0.0711778	0.0287084	-0.0583971	0.0461825	-0.182807	0.0188418	0.20267	0.0746566	0.289462	0.107409	0.0882397	0.0955746	0.165585	0.0682029	0.113579	0.0497325	0.165585	0.272633	0.0447697	0.0447697	0.00101596
162	0.15909	0.0773388	0.0128555	0.187955	0.306642	-0.103627	0.0420804	0.112559	0.184979	0.0623067	0.0643446	0.0589154	0.0910659	0.32555	0.134451	0.0326965	0.0512792	0.0972315	0.134745	0.0648082	0.0699722	0.0972315	0.239969	0.15909	0.0773388	0.0128555	0.187955	0.306642	-0.103627	0.0420804	0.112559	0.184979	0.0623067	0.0643446	0.0589154	0.0910659	0.32555	0.134451	0.0326965	0.0512792	0.0972315	0.134745	0.0648082	0.0699722	0.0972315	0.239969	0.054242	0.054242	-0.00970616
163	0.170719	0.0305827	0.0141133	0.109395	0.190937	-0.200995	0.0177012	0.0403965	0.120032	-0.0699124	0.0510425	0.179236	0.105576	0.319974	0.169894	0.106997	0.0879935	0.15246	0.055315	0.0836402	0.0137576	0.15246	0.327409	0.170719	0.0305827	0.0141133	0.109395	0.190937	-0.200995	0.0177012	0.0403965	0.120032	-0.0699124	0.0510425	0.179236	0.105576	0.319974	0.169894	0.106997	0.0879935	0.15246	0.055315	0.0836402	0.0137576	0.15246	0.327409	0.0505423	0.0505423	-0.00903656
164	0.13718	-0.0151633	0.00782227	0.170678	0.0448534	-0.181396	0.0345142	0.246031	0.187998	0.0644522	-0.0343289	-0.0815263	0.0146071	0.304694	0.158052	0.0323723	0.117296	0.16232	0.102672	0.0822848	0.0776346	0.16232	0.318625	0.13718	-0.0151633	0.00782227	0.170678	0.0448534	-0.181396	0.0345142	0.246031	0.187998	0.0644522	-0.0343289	-0.0815263	0.0146071	0.304694	0.158052	0.0323723	0.117296	0.16232	0.102672	0.0822848	0.0776346	0.16232	0.318625	0.0691884	0.0691884	-0.00753672
165	0.0746441	0.031941	0.00352462	0.161986	0.198822	-0.0549532	0.0217598	-0.0285649	0.186901	0.0927964	0.021038	0.101171	0.0677679	0.232841	0.126462	0.0567552	0.0783264	0.188096	0.0941951	0.0544016	0.048971	0.188096	0.30591	0.0746441	0.031941	0.00352462	0.161986	0.198822	-0.0549532	0.0217598	-0.0285649	0.186901	0.0927964	0.021038	0.101171	0.0677679	0.232841	0.126462	0.0567552	0.0783264	0.188096	0.0941951	0.0544016	0.048971	0.188096	0.30591	0.0768494	0.0768494	-0.0117562
166	0.12194	0.0120109	0.00366739	0.238861	-0.0387626	-0.134561	0.0305578	-0.0374894	0.151434	0.0628905	0.00343716	0.0395251	0.0476653	0.287399	0.160226	0.0938535	0.125146	0.0936671	0.061046	0.0739123	0.0383997	0.0936671	0.266319	0.12194	0.0120109	0.00366739	0.238861	-0.0387626	-0.134561	0.0305578	-0.0374894	0.151434	0.0628905	0.00343716	0.0395251	0.0476653	0.287399	0.160226	0.0938535	0.125146	0.0936671	0.061046	0.0739123	0.0383997	0.0936671	0.266319	0.0371422	0.0371422	-0.0140493
167	0.127012	0.0741172	-0.02383	0.270046	0.116347	-0.0724103	0.0541411	-0.0406798	0.0917512	-0.0132387	-0.00225302	-0.0610479	0.0812188	0.19315	0.126704	0.0415308	0.0768149	0.0644544	0.162889	0.073299	0.109338	0.0644544	0.256298	0.127012	0.0741172	-0.02383	0.270046	0.116347	-0.0724103	0.0541411	-0.0406798	0.0917512	-0.0132387	-0.00225302	-0.0610479	0.0812188	0.19315	0.126704	0.0415308	0.0768149	0.0644544	0.162889	0.073299	0.109338	0.0644544	0.256298	0.0654719	0.0654719	0.00962408
168	0.122336	0.102049	-0.0136696	0.117599	0.175167	0.0142285	0.0974988	-0.00969649	0.0907706	-0.0701897	-0.0152618	0.224626	0.156384	0.352454	0.122791	0.0386466	0.0563929	0.123448	0.119515	0.0797337	0.0367548	0.123448	0.333677	0.122336	0.102049	-0.0136696	0.117599	0.175167	0.0142285	0.0974988	-0.00969649	0.0907706	-0.0701897	-0.0152618	0.224626	0.156384	0.352454	0.122791	0.0386466	0.0563929	0.123448	0.119515	0.0797337	0.0367548	0.123448	0.333677	0.0627584	0.0627584	-0.00622595
169	0.0894884	0.0315927	0.0118344	0.248043	0.0321602	-0.0938478	0.0547522	0.0368333	0.166091	0.0849149	0.0744459	0.0518998	0.0418118	0.316097	0.131805	0.0820313	0.0526212	0.14822	0.0274659	0.0926799	0.0257024	0.14822	0.372297	0.0894884	0.0315927	0.0118344	0.248043	0.0321602	-0.0938478	0.0547522	0.0368333	0.166091	0.0849149	0.0744459	0.0518998	0.0418118	0.316097	0.131805	0.0820313	0.0526212	0.14822	0.0274659	0.0926799	0.0257024	0.14822	0.372297	0.051941	0.051941	-0.0144787
170	0.145095	0.0504606	-0.00192244	0.211208	0.0536958	-0.0564888	0.0310651	0.073419	0.178824	-0.0749186	-0.0156861	0.00962763	0.109851	0.362838	0.163425	0.136902	-0.00493875	0.164538	0.102699	0.0875794	0.0261037	0.164538	0.255899	0.145095	0.0504606	-0.00192244	0.211208	0.0536958	-0.0564888	0.0310651	0.073419	0.178824	-0.0749186	-0.0156861	0.00962763	0.109851	0.362838	0.163425	0.136902	-0.00493875	0.164538	0.102699	0.0875794	0.0261037	0.164538	0.255899	0.0875057	0.0875057	-0.0111051
171	0.0960443	0.0530813	-0.0131726	0.163344	0.134032	-0.131187	0.0520486	-0.0348142	0.178334	0.102955	0.01191	0.0271666	0.112939	0.278721	0.176513	0.0828331	0.0966623	0.0815161	0.0663731	0.0532289	0.0368955	0.0815161	0.286534	0.0960443	0.0530813	-0.0131726	0.163344	0.134032	-0.131187	0.0520486	-0.0348142	0.178334	0.102955	0.01191	0.0271666	0.112939	0.278721	0.176513	0.0828331	0.0966623	0.0815161	0.0663731	0.0532289	0.0368955	0.0815161	0.286534	0.0646669	0.0646669	-0.0157994
172	0.0816529	0.0122112	-0.0141268	0.106299	0.209966	-0.0225041	0.0613085	-0.0706435	0.116509	-0.0670371	-0.0448857	0.0218075	0.110478	0.374193	0.14272	0.0795089	0.087306	0.0962913	0.114053	0.121983	0.0457817	0.0962913	0.380201	0.0816529	0.0122112	-0.0141268	0.106299	0.209966	-0.0225041	0.0613085	-0.0706435	0.116509	-0.0670371	-0.0448857	0.0218075	0.110478	0.374193	0.14272	0.0795089	0.087306	0.0962913	0.114053	0.121983	0.0457817	0.0962913	0.380201	0.0612959	0.0612959	-0.00959954
173	0.0777126	0.0641043	-0.00760626	0.213544	0.0644534	-0.0338391	0.0313017	-0.0592961	0.0907706	0.0195278	0.0106248	-0.00734295	0.107196	0.227832	0.109994	0.119284	0.104281	0.139839	0.137247	0.0664866	0.0399441	0.139839	0.250383	0.0777126	0.0641043	-0.00760626	0.213544	0.0644534	-0.0338391	0.0313017	-0.0592961	0.0907706	0.0195278	0.0106248	-0.00734295	0.107196	0.227832	0.109994	0.119284	0.104281	0.139839	0.137247	0.0664866	0.0399441	0.139839	0.250383	0.0833935	0.0833935	0.000512694
174	0.119415	0.00164102	-0.00894182	0.142916	0.185354	-0.204349	0.0391256	-0.0125032	0.10811	0.00535572	0.0212751	0.173877	0.207279	0.308685	0.178003	0.0617353	0.0630323	0.252813	0.177768	0.0532827	0.0758195	0.252813	0.266625	0.119415	0.00164102	-0.00894182	0.142916	0.185354	-0.204349	0.0391256	-0.0125032	0.10811	0.00535572	0.0212751	0.173877	0.207279	0.308685	0.178003	0.0617353	0.0630323	0.252813	0.177768	0.0532827	0.0758195	0.252813	0.266625	0.0628724	0.0628724	-0.0118898
175	0.134259	-0.00826742	0.0151109	0.147589	0.0652277	-0.209562	0.0220921	-0.0178644	0.13501	-0.0255426	-0.0466951	0.0803194	0.0953625	0.263985	0.131091	0.0845402	0.0624955	0.0933978	0.150485	0.0478372	0.0517491	0.0933978	0.27069	0.134259	-0.00826742	0.0151109	0.147589	0.0652277	-0.209562	0.0220921	-0.0178644	0.13501	-0.0255426	-0.0466951	0.0803194	0.0953625	0.263985	0.131091	0.0845402	0.0624955	0.0933978	0.150485	0.0478372	0.0517491	0.0933978	0.27069	0.0827025	0.0827025	0.000730207
176	0.132051	-0.0380624	0.0106597	0.161334	0.114432	-0.0604692	0.0301525	-0.0692401	0.12447	0.0624527	0.0127149	0.228865	0.14507	0.24397	0.178064	0.0879949	0.0829221	0.0457088	0.0889221	0.0604278	0.0893491	0.0457088	0.34608	0.132051	-0.0380624	0.0106597	0.161334	0.114432	-0.0604692	0.0301525	-0.0692401	0.12447	0.0624527	0.0127149	0.228865	0.14507	0.24397	0.178064	0.0879949	0.0829221	0.0457088	0.0889221	0.0604278	0.0893491	0.0457088	0.34608	0.064895	0.064895	0.00301054
177	0.131802	-0.0440005	0.0162332	0.266895	0.00775187	-0.0953632	0.0372097	-0.0856856	0.128314	0.0899211	-0.0071009	-0.0269119	0.0753047	0.319813	0.149983	0.0668715	0.11699	0.123247	0.106169	0.0573075	0.0454305	0.123247	0.1437	0.131802	-0.0440005	0.0162332	0.266895	0.00775187	-0.0953632	0.0372097	-0.0856856	0.128314	0.0899211	-0.0071009	-0.0269119	0.0753047	0.319813	0.149983	0.0668715	0.11699	0.123247	0.106169	0.0573075	0.0454305	0.123247	0.1437	0.0797105	0.0797105	-0.0087366
178	0.124612	0.0461855	0.00205532	0.228321	0.15518	-0.120781	0.0458748	0.0454946	-0.0509928	0.121987	0.0366611	-0.00549161	0.099422	0.267114	0.119178	0.0602354	-0.0020099	0.0839737	0.0809845	0.0894943	0.0230748	0.0839737	0.296289	0.124612	0.0461855	0.00205532	0.228321	0.15518	-0.120781	0.0458748	0.0454946	-0.0509928	0.121987	0.0366611	-0.00549161	0.099422	0.267114	0.119178	0.0602354	-0.0020099	0.0839737	0.0809845	0.0894943	0.0230748	0.0839737	0.296289	0.060719	0.060719	0.0100406
179	0.13675	0.0361203	0.0137266	0.21023	0.0175519	0.239534	0.0492478	0.066786	0.0904868	0.123695	-0.0266609	0.0709004	0.139414	0.304063	0.13435	0.054479	0.0702085	0.0832001	0.139508	0.1211	0.0129352	0.0832001	0.189692	0.13675	0.0361203	0.0137266	0.21023	0.0175519	0.239534	0.0492478	0.066786	0.0904868	0.123695	-0.0266609	0.0709004	0.139414	0.304063	0.13435	0.054479	0.0702085	0.0832001	0.139508	0.1211	0.0129352	0.0832001	0.189692	0.097139	0.097139	-0.01333
180	0.163223	0.0868031	0.00398908	0.226963	0.126738	-0.0472956	0.0546192	0.130277	0.0566715	-0.0102321	-0.0284016	0.0506006	0.104066	0.241702	0.191635	0.0840882	-0.0159996	0.134253	0.11303	0.0807776	0.0520493	0.134253	0.317082	0.163223	0.0868031	0.00398908	0.226963	0.126738	-0.0472956	0.0546192	0.130277	0.0566715	-0.0102321	-0.0284016	0.0506006	0.104066	0.241702	0.191635	0.0840882	-0.0159996	0.134253	0.11303	0.0807776	0.0520493	0.134253	0.317082	0.0440653	0.0440653	0.00406683
181	0.141755	0.0287195	0.00507705	0.191812	0.131933	-0.191195	0.054877	-0.00830411	0.181237	0.0162292	0.016864	0.164279	0.149195	0.353294	0.163082	0.136902	0.0460525	0.198059	0.124788	0.119938	0.0103068	0.198059	0.277577	0.141755	0.0287195	0.00507705	0.191812	0.131933	-0.191195	0.054877	-0.00830411	0.181237	0.0162292	0.016864	0.164279	0.149195	0.353294	0.163082	0.136902	0.0460525	0.198059	0.124788	0.119938	0.0103068	0.198059	0.277577	0.0678064	0.0678064	-0.0168742
182	0.181102	-0.00590786	-0.0106714	0.225442	0.236677	0.0433035	0.0509659	0.00190306	0.146106	-0.114983	-0.00576571	0.229238	0.138376	0.270853	0.137811	0.0893011	0.048275	0.150438	0.0788861	0.0843832	0.0766115	0.150438	0.340471	0.181102	-0.00590786	-0.0106714	0.225442	0.236677	0.0433035	0.0509659	0.00190306	0.146106	-0.114983	-0.00576571	0.229238	0.138376	0.270853	0.137811	0.0893011	0.048275	0.150438	0.0788861	0.0843832	0.0766115	0.150438	0.340471	0.0563786	0.0563786	0.0079906
183	0.170107	0.0190548	0.022864	0.330079	0.270132	-0.0558827	0.0258638	-0.0642626	0.24679	0.0882134	0.0255428	-0.00235733	0.0773331	0.374785	0.148998	0.096053	-0.0304932	0.102484	0.0905355	0.0712861	0.0341568	0.102484	0.274218	0.170107	0.0190548	0.022864	0.330079	0.270132	-0.0558827	0.0258638	-0.0642626	0.24679	0.0882134	0.0255428	-0.00235733	0.0773331	0.374785	0.148998	0.096053	-0.0304932	0.102484	0.0905355	0.0712861	0.0341568	0.102484	0.274218	0.0506899	0.0506899	-0.00104686
184	0.111591	0.048101	0.00626803	0.260593	0.0775337	-0.184144	0.0456754	-0.0901478	0.0971311	-0.098096	0.01264	0.143801	0.076772	0.342301	0.15942	0.113852	-0.00916722	0.130483	0.0811179	0.080369	0.061989	0.130483	0.40333	0.111591	0.048101	0.00626803	0.260593	0.0775337	-0.184144	0.0456754	-0.0901478	0.0971311	-0.098096	0.01264	0.143801	0.076772	0.342301	0.15942	0.113852	-0.00916722	0.130483	0.0811179	0.080369	0.061989	0.130483	0.40333	0.100067	0.100067	-0.00819637
185	0.137056	0.00697835	0.0077048	0.193388	0.232073	-0.294059	0.0770534	-0.0697445	0.172786	-0.0268416	-0.0180445	0.23921	0.0543143	0.344751	0.237831	0.134975	0.0626509	0.140984	0.101729	0.0925616	0.0676456	0.140984	0.234759	0.137056	0.00697835	0.0077048	0.193388	0.232073	-0.294059	0.0770534	-0.0697445	0.172786	-0.0268416	-0.0180445	0.23921	0.0543143	0.344751	0.237831	0.134975	0.0626509	0.140984	0.101729	0.0925616	0.0676456	0.140984	0.234759	0.0762892	0.0762892	0.00339723
186	0.125099	0.0671691	0.0281756	0.234678	0.0888618	-0.187215	0.0473773	-0.014674	0.121077	-0.00937097	-0.0132154	0.0535563	0.132999	0.303698	0.131413	0.0653447	0.0431236	0.0689635	0.194773	0.0884292	0.0669736	0.0689635	0.295982	0.125099	0.0671691	0.0281756	0.234678	0.0888618	-0.187215	0.0473773	-0.014674	0.121077	-0.00937097	-0.0132154	0.0535563	0.132999	0.303698	0.131413	0.0653447	0.0431236	0.0689635	0.194773	0.0884292	0.0669736	0.0689635	0.295982	0.0924532	0.0924532	0.0159661
187	0.165227	0.0373306	-0.0073442	0.215174	0.0559981	-0.204975	0.02806	0.048685	0.0534332	0.0103619	0.0191725	0.061124	0.175019	0.309364	0.173415	0.0789009	-0.0113521	0.17854	0.0892448	0.0767105	0.0867618	0.17854	0.38404	0.165227	0.0373306	-0.0073442	0.215174	0.0559981	-0.204975	0.02806	0.048685	0.0534332	0.0103619	0.0191725	0.061124	0.175019	0.309364	0.173415	0.0789009	-0.0113521	0.17854	0.0892448	0.0767105	0.0867618	0.17854	0.38404	0.0744981	0.0744981	-0.0076931
188	0.161944	0.0706432	0.02549	0.164376	0.162861	-0.24292	0.014466	-0.0759937	0.233669	-0.109977	-0.0168341	0.0541084	0.0579866	0.306531	0.188868	0.115831	0.0399122	0.160298	0.128206	0.111222	0.0658198	0.160298	0.366075	0.161944	0.0706432	0.02549	0.164376	0.162861	-0.24292	0.014466	-0.0759937	0.233669	-0.109977	-0.0168341	0.0541084	0.0579866	0.306531	0.188868	0.115831	0.0399122	0.160298	0.128206	0.111222	0.0658198	0.160298	0.366075	0.0669008	0.0669008	-0.0112472
189	0.119868	0.0481532	-0.0270812	0.324864	0.0352368	-0.192408	0.0440546	-0.0446267	0.146596	-0.145458	-0.0315649	0.144532	0.084135	0.279013	0.176613	0.0829367	0.00733229	0.211552	0.112843	0.0659271	0.0912045	0.211552	0.340957	0.119868	0.0481532	-0.0270812	0.324864	0.0352368	-0.192408	0.0440546	-0.0446267	0.146596	-0.145458	-0.0315649	0.144532	0.084135	0.279013	0.176613	0.0829367	0.00733229	0.211552	0.112843	0.0659271	0.0912045	0.211552	0.340957	0.100265	0.100265	0.00565482
190	0.180524	0.0442264	0.0202869	0.251846	0.0952186	-0.0757846	0.0246044	-0.192516	0.207982	-0.0594622	-0.0231482	0.0295701	0.0696251	0.427689	0.154773	0.0856662	0.0172678	0.0417725	0.0724016	0.0494512	0.058057	0.0417725	0.350844	0.180524	0.0442264	0.0202869	0.251846	0.0952186	-0.0757846	0.0246044	-0.192516	0.207982	-0.0594622	-0.0231482	0.0295701	0.0696251	0.427689	0.154773	0.0856662	0.0172678	0.0417725	0.0724016	0.0494512	0.058057	0.0417725	0.350844	0.0853993	0.0853993	-0.00839966
191	0.121181	0.0361203	0.0145959	0.232668	0.0148625	-0.0457802	0.0195506	0.129257	0.0914802	-0.0899372	-0.0158296	0.030853	0.134037	0.244309	0.151523	0.10882	0.0217458	0.124794	0.193886	0.157549	0.0273275	0.124794	0.251221	0.121181	0.0361203	0.0145959	0.232668	0.0148625	-0.0457802	0.0195506	0.129257	0.0914802	-0.0899372	-0.0158296	0.030853	0.134037	0.244309	0.151523	0.10882	0.0217458	0.124794	0.193886	0.157549	0.0273275	0.124794	0.251221	0.0913832	0.0913832	-0.00286516
192	0.134418	-0.0405265	0.0298057	0.18839	0.139044	-0.191498	0.0352793	0.0252337	0.131011	-0.0308407	0.0373786	0.175176	0.111817	0.411525	0.173506	0.116025	0.00361708	0.0666085	0.169507	0.110996	0.0266753	0.0666085	0.265527	0.134418	-0.0405265	0.0298057	0.18839	0.139044	-0.191498	0.0352793	0.0252337	0.131011	-0.0308407	0.0373786	0.175176	0.111817	0.411525	0.173506	0.116025	0.00361708	0.0666085	0.169507	0.110996	0.0266753	0.0666085	0.265527	0.110442	0.110442	-0.00182309
193	0.0757084	0.0824236	0.0116988	0.16128	0.22975	-0.208329	0.0457856	0.0658979	0.210511	-0.0319791	0.0264911	4.62e-05	0.0415747	0.371995	0.126252	0.0249222	0.039432	0.115909	0.113676	0.0918839	0.0901016	0.115909	0.441244	0.0757084	0.0824236	0.0116988	0.16128	0.22975	-0.208329	0.0457856	0.0658979	0.210511	-0.0319791	0.0264911	4.62e-05	0.0415747	0.371995	0.126252	0.0249222	0.039432	0.115909	0.113676	0.0918839	0.0901016	0.115909	0.441244	0.104324	0.104324	0.0154586
194	0.135482	0.00858912	0.0249568	0.19643	0.0392709	-0.340268	0.0510826	-0.0868258	0.190578	0.0191045	0.0497447	0.0880658	0.131163	0.309251	0.152649	0.0695876	0.0675103	0.185237	0.0999802	0.0660136	0.0566433	0.185237	0.460974	0.135482	0.00858912	0.0249568	0.19643	0.0392709	-0.340268	0.0510826	-0.0868258	0.190578	0.0191045	0.0497447	0.0880658	0.131163	0.309251	0.152649	0.0695876	0.0675103	0.185237	0.0999802	0.0660136	0.0566433	0.185237	0.460974	0.0648145	0.0648145	0.0105979
195	0.141574	0.0116104	0.0289093	0.112112	0.159805	-0.127812	0.0501846	-0.00778882	0.0776496	0.106531	0.00793565	0.0956335	0.104583	0.328452	0.166957	0.0924436	0.0354907	0.148553	0.0892177	0.10527	0.0356117	0.148553	0.318758	0.141574	0.0116104	0.0289093	0.112112	0.159805	-0.127812	0.0501846	-0.00778882	0.0776496	0.106531	0.00793565	0.0956335	0.104583	0.328452	0.166957	0.0924436	0.0354907	0.148553	0.0892177	0.10527	0.0356117	0.148553	0.318758	0.0815688	0.0815688	0.00102591
196	0.15584	0.0577657	0.020905	0.229734	0.182482	0.0108543	0.074828	0.0439706	0.217581	0.176924	0.00125967	0.0365857	0.160768	0.305534	0.141985	0.0907621	0.0328868	0.102283	0.0517906	0.075978	0.0300752	0.102283	0.237454	0.15584	0.0577657	0.020905	0.229734	0.182482	0.0108543	0.074828	0.0439706	0.217581	0.176924	0.00125967	0.0365857	0.160768	0.305534	0.141985	0.0907621	0.0328868	0.102283	0.0517906	0.075978	0.0300752	0.102283	0.237454	0.0671322	0.0671322	0.00741341
197	0.125586	0.018959	0.0321353	0.18551	0.120401	-0.0846545	0.0440773	0.258014	0.0227402	0.0553009	-0.0159606	-0.0130594	0.0806155	0.306579	0.227922	0.0872698	0.0283664	0.138625	0.108725	0.117851	0.0673849	0.138625	0.299821	0.125586	0.018959	0.0321353	0.18551	0.120401	-0.0846545	0.0440773	0.258014	0.0227402	0.0553009	-0.0159606	-0.0130594	0.0806155	0.306579	0.227922	0.0872698	0.0283664	0.138625	0.108725	0.117851	0.0673849	0.138625	0.299821	0.113484	0.113484	0.00265513
198	0.165646	0.0699379	-0.00644961	0.119609	0.218035	-0.00658256	0.0335563	0.296135	0.137152	-0.0242582	0.0292738	0.0286444	0.110802	0.262174	0.162227	0.0496024	0.0111229	0.165884	0.0818192	0.117732	0.0466337	0.165884	0.31293	0.165646	0.0699379	-0.00644961	0.119609	0.218035	-0.00658256	0.0335563	0.296135	0.137152	-0.0242582	0.0292738	0.0286444	0.110802	0.262174	0.162227	0.0496024	0.0111229	0.165884	0.0818192	0.117732	0.0466337	0.165884	0.31293	0.0833264	0.0833264	0.00295936
199	0.120751	0.0178533	0.00167399	0.240491	0.169401	-0.0675005	0.0582224	0.403348	-0.00613372	-0.00579511	-0.0055099	0.0801246	0.178971	0.347763	0.19076	0.101731	0.0611394	0.11702	0.0401123	0.129355	0.0901616	0.11702	0.289361	0.120751	0.0178533	0.00167399	0.240491	0.169401	-0.0675005	0.0582224	0.403348	-0.00613372	-0.00579511	-0.0055099	0.0801246	0.178971	0.347763	0.19076	0.101731	0.0611394	0.11702	0.0401123	0.129355	0.0901616	0.11702	0.289361	0.11386	0.11386	0.00421042
200	0.17133	0.0400471	0.0226436	0.134115	0.116734	-0.0932214	0.0255623	0.336547	0.0233982	0.0884907	-0.068339	-0.016015	0.110241	0.370837	0.124118	0.0989762	0.10277	0.110998	0.102859	0.104797	0.0739436	0.110998	0.289361	0.17133	0.0400471	0.0226436	0.134115	0.116734	-0.0932214	0.0255623	0.336547	0.0233982	0.0884907	-0.068339	-0.016015	0.110241	0.370837	0.124118	0.0989762	0.10277	0.110998	0.102859	0.104797	0.0739436	0.110998	0.289361	0.0934729	0.0934729	0.00716035
201	0.133104	0.0428682	0.0123404	0.157096	0.223801	-0.101485	0.044356	0.322272	0.101414	0.0149449	0.0351824	0.0290179	0.0573807	0.378793	0.191644	0.0982902	0.0528896	0.149699	0.0944115	0.122316	0.107824	0.149699	0.328779	0.133104	0.0428682	0.0123404	0.157096	0.223801	-0.101485	0.044356	0.322272	0.101414	0.0149449	0.0351824	0.0290179	0.0573807	0.378793	0.191644	0.0982902	0.0528896	0.149699	0.0944115	0.122316	0.107824	0.149699	0.328779	0.117576	0.117576	-0.0100019
202	0.140305	0.0782443	0.0256418	0.160302	0.0779208	-0.290381	0.0464275	0.561433	0.146493	0.0983718	-0.0165783	0.319483	0.147533	0.258432	0.188667	0.0894047	0.0603718	0.168073	0.0598363	0.0462771	0.112206	0.168073	0.255946	0.140305	0.0782443	0.0256418	0.160302	0.0779208	-0.290381	0.0464275	0.561433	0.146493	0.0983718	-0.0165783	0.319483	0.147533	0.258432	0.188667	0.0894047	0.0603718	0.168073	0.0598363	0.0462771	0.112206	0.168073	0.255946	0.0491268	0.0491268	-0.000483887
203	0.143646	0.10527	-0.00775084	0.0976604	0.154793	-0.140683	0.00113127	0.553781	0.125141	-0.0219667	0.0150359	0.201192	0.13179	0.3598	0.159673	0.112959	-0.0239857	0.228618	0.100842	0.122037	0.0493616	0.228618	0.335527	0.143646	0.10527	-0.00775084	0.0976604	0.154793	-0.140683	0.00113127	0.553781	0.125141	-0.0219667	0.0150359	0.201192	0.13179	0.3598	0.159673	0.112959	-0.0239857	0.228618	0.100842	0.122037	0.0493616	0.228618	0.335527	0.06784	0.06784	-0.0113908
204	0.127397	0.018454	-0.0133154	0.260212	0.291464	-0.0819067	0.0546857	0.459186	0.188539	-0.00436477	0.0157846	0.00852332	0.153513	0.252495	0.171342	0.0662756	0.0537701	0.0878117	0.0376641	0.112115	0.120049	0.0878117	0.375298	0.127397	0.018454	-0.0133154	0.260212	0.291464	-0.0819067	0.0546857	0.459186	0.188539	-0.00436477	0.0157846	0.00852332	0.153513	0.252495	0.171342	0.0662756	0.0537701	0.0878117	0.0376641	0.112115	0.120049	0.0878117	0.375298	0.0874386	0.0874386	0.00947623
205	0.0980485	0.0538824	0.0207857	0.16166	0.227448	-0.21231	0.0598805	0.454593	0.136223	0.0447047	0.0398493	0.12571	0.117667	0.383306	0.195226	0.102261	0.0260496	0.0978384	0.0710819	0.0865461	0.046493	0.0978384	0.349653	0.0980485	0.0538824	0.0207857	0.16166	0.227448	-0.21231	0.0598805	0.454593	0.136223	0.0447047	0.0398493	0.12571	0.117667	0.383306	0.195226	0.102261	0.0260496	0.0978384	0.0710819	0.0865461	0.046493	0.0978384	0.349653	0.0984203	0.0984203	0.00337022
206	0.193636	0.0700946	0.0130507	0.134278	0.133074	-0.193337	0.0479446	0.36867	0.207763	0.0763328	-0.00924096	0.00779253	0.137491	0.405497	0.208757	0.104836	0.0509355	0.0887178	0.0213582	0.0964461	0.126628	0.0887178	0.278855	0.193636	0.0700946	0.0130507	0.134278	0.133074	-0.193337	0.0479446	0.36867	0.207763	0.0763328	-0.00924096	0.00779253	0.137491	0.405497	0.208757	0.104836	0.0509355	0.0887178	0.0213582	0.0964461	0.126628	0.0887178	0.278855	0.108698	0.108698	0.00994822
207	0.122698	0.0240439	0.0214453	0.198332	0.159418	-0.202207	0.0709234	0.346491	0.202215	0.132277	0.0227601	0.158384	0.0978467	0.302658	0.164703	0.147044	0.0445598	0.0730708	0.0259065	0.0899037	0.0601131	0.0730708	0.37199	0.122698	0.0240439	0.0214453	0.198332	0.159418	-0.202207	0.0709234	0.346491	0.202215	0.132277	0.0227601	0.158384	0.0978467	0.302658	0.164703	0.147044	0.0445598	0.0730708	0.0259065	0.0899037	0.0601131	0.0730708	0.37199	0.0696814	0.0696814	-0.000284855
208	0.156033	0.0197165	-0.0115587	0.32155	0.123844	-0.0623079	0.0480775	0.468999	0.182501	-0.117128	0.0536256	0.138994	0.156816	0.346357	0.176322	0.107216	0.0308573	0.0989497	0.109075	0.0309633	0.0647671	0.0989497	0.384347	0.156033	0.0197165	-0.0115587	0.32155	0.123844	-0.0623079	0.0480775	0.468999	0.182501	-0.117128	0.0536256	0.138994	0.156816	0.346357	0.176322	0.107216	0.0308573	0.0989497	0.109075	0.0309633	0.0647671	0.0989497	0.384347	0.0943953	0.0943953	0.0045701
209	0.105091	0.105775	0.0263267	0.313672	0.105202	-0.0913828	0.0568512	0.378362	0.180644	-0.114414	0.0344524	0.187713	0.147704	0.331782	0.169873	0.104435	0.0228383	0.158649	0.0875502	0.0657877	0.127873	0.158649	0.350584	0.105091	0.105775	0.0263267	0.313672	0.105202	-0.0913828	0.0568512	0.378362	0.180644	-0.114414	0.0344524	0.187713	0.147704	0.331782	0.169873	0.104435	0.0228383	0.158649	0.0875502	0.0657877	0.127873	0.158649	0.350584	0.0646334	0.0646334	-0.00885744
210	0.117229	0.0517231	-0.00752131	0.286671	0.154997	-0.188427	0.0781588	0.462497	0.111413	0.0455659	-0.00955292	0.131247	0.154635	0.314421	0.15257	0.141792	0.0821546	0.128667	0.146906	0.0733307	0.0405355	0.128667	0.390794	0.117229	0.0517231	-0.00752131	0.286671	0.154997	-0.188427	0.0781588	0.462497	0.111413	0.0455659	-0.00955292	0.131247	0.154635	0.314421	0.15257	0.141792	0.0821546	0.128667	0.146906	0.0733307	0.0405355	0.128667	0.390794	0.102566	0.102566	0.0207755
211	0.188111	0.0983746	0.0414932	0.138516	0.314527	-0.184447	0.023204	0.334508	0.183056	-0.0202591	0.00777343	0.198415	0.152217	0.363086	0.139742	0.0582565	0.0103365	0.137347	0.0901317	0.116936	0.083783	0.137347	0.33178	0.188111	0.0983746	0.0414932	0.138516	0.314527	-0.184447	0.023204	0.334508	0.183056	-0.0202591	0.00777343	0.198415	0.152217	0.363086	0.139742	0.0582565	0.0103365	0.137347	0.0901317	0.116936	0.083783	0.137347	0.33178	0.0724252	0.0724252	0.000226941
212	0.150202	0.0628418	0.0114711	0.237612	0.244175	-0.168849	0.097314	0.267706	0.212317	-0.0414369	-0.0150996	0.242896	0.104843	0.418532	0.183617	0.113528	0.0034664	0.215963	0.142736	0.0959837	0.059451	0.215963	0.394674	0.150202	0.0628418	0.0114711	0.237612	0.244175	-0.168849	0.097314	0.267706	0.212317	-0.0414369	-0.0150996	0.242896	0.104843	0.418532	0.183617	0.113528	0.0034664	0.215963	0.142736	0.0959837	0.059451	0.215963	0.394674	0.0430121	0.0430121	-0.0137309
213	0.213768	0.0300777	0.00979037	0.229082	0.0506193	-0.0785324	0.0550326	0.242468	0.213801	-0.184384	0.0123842	0.169086	0.121448	0.336521	0.18761	0.101084	0.0851588	0.172449	0.111013	0.0700807	0.0574854	0.172449	0.358263	0.213768	0.0300777	0.00979037	0.229082	0.0506193	-0.0785324	0.0550326	0.242468	0.213801	-0.184384	0.0123842	0.169086	0.121448	0.336521	0.18761	0.101084	0.0851588	0.172449	0.111013	0.0700807	0.0574854	0.172449	0.358263	0.0604574	0.0604574	-0.000456875
214	0.1822	0.0525763	0.0027475	0.268144	0.0229511	-0.172506	0.0804134	0.288997	0.180644	0.0395526	0.0134823	0.0945292	0.168671	0.340943	0.20736	0.132789	0.0629946	0.122003	0.149623	0.0901508	0.050666	0.122003	0.331647	0.1822	0.0525763	0.0027475	0.268144	0.0229511	-0.172506	0.0804134	0.288997	0.180644	0.0395526	0.0134823	0.0945292	0.168671	0.340943	0.20736	0.132789	0.0629946	0.122003	0.149623	0.0901508	0.050666	0.122003	0.331647	0.0593874	0.0593874	0.00433552
215	0.156939	0.00783162	0.0315533	0.183663	0.182482	-0.179254	0.0684256	0.251392	0.140558	0.0392753	-0.0159419	-0.00273085	0.148568	0.385639	0.173686	0.13425	0.0223203	0.189173	0.161651	0.0399491	0.110712	0.189173	0.366647	0.156939	0.00783162	0.0315533	0.183663	0.182482	-0.179254	0.0684256	0.251392	0.140558	0.0392753	-0.0159419	-0.00273085	0.148568	0.385639	0.173686	0.13425	0.0223203	0.189173	0.161651	0.0399491	0.110712	0.189173	0.366647	0.0810925	0.0810925	-0.00153591
216	0.118543	0.0241919	0.0172471	0.251357	0.297617	-0.0849576	0.0860572	0.322009	0.104111	-0.131432	0.0368483	0.105036	0.155088	0.328339	0.225831	0.130952	0.0376332	0.143437	0.179087	0.0825107	0.086441	0.143437	0.332	0.118543	0.0241919	0.0172471	0.251357	0.297617	-0.0849576	0.0860572	0.322009	0.104111	-0.131432	0.0368483	0.105036	0.155088	0.328339	0.225831	0.130952	0.0376332	0.143437	0.179087	0.0825107	0.086441	0.143437	0.332	0.0872407	0.0872407	0.00808727
217	0.164797	0.0978696	0.0177206	0.15074	0.174026	-0.0534379	0.0455279	0.244628	0.0875839	-0.104241	-0.00192234	0.0164646	0.132546	0.321763	0.226485	0.125248	0.027547	0.0808109	0.195177	0.118507	0.0424418	0.0808109	0.355042	0.164797	0.0978696	0.0177206	0.15074	0.174026	-0.0534379	0.0455279	0.244628	0.0875839	-0.104241	-0.00192234	0.0164646	0.132546	0.321763	0.226485	0.125248	0.027547	0.0808109	0.195177	0.118507	0.0424418	0.0808109	0.355042	0.0613127	0.0613127	0.00203102
218	0.170322	0.0965636	0.0110157	0.357896	0.17478	-0.119549	0.0455425	0.281213	0.16022	-0.0209743	0.00500945	0.0592727	0.103547	0.353568	0.166885	0.112532	0.032656	0.0573896	0.0718896	0.108284	0.0652589	0.0573896	0.331734	0.170322	0.0965636	0.0110157	0.357896	0.17478	-0.119549	0.0455425	0.281213	0.16022	-0.0209743	0.00500945	0.0592727	0.103547	0.353568	0.166885	0.112532	0.032656	0.0573896	0.0718896	0.108284	0.0652589	0.0573896	0.331734	0.0757962	0.0757962	0.0090014
219	0.181713	0.133254	0.0232851	0.208165	0.236494	-0.085887	0.0401208	0.201157	0.260131	0.108384	-0.0213887	0.128844	0.125249	0.36608	0.193385	0.0635339	0.0350104	0.152827	0.202307	0.126471	0.0766617	0.152827	0.353273	0.181713	0.133254	0.0232851	0.208165	0.236494	-0.085887	0.0401208	0.201157	0.260131	0.108384	-0.0213887	0.128844	0.125249	0.36608	0.193385	0.0635339	0.0350104	0.152827	0.202307	0.126471	0.0766617	0.152827	0.353273	0.0669176	0.0669176	-0.00400106
220	0.192855	0.0673258	0.0302611	0.210393	0.172478	-0.00108681	0.0511782	0.134223	0.202267	0.105669	0.0270215	0.239015	0.12758	0.3547	0.165527	0.082225	0.077314	0.154105	0.117631	0.117033	0.034318	0.154105	0.442569	0.192855	0.0673258	0.0302611	0.210393	0.172478	-0.00108681	0.0511782	0.134223	0.202267	0.105669	0.0270215	0.239015	0.12758	0.3547	0.165527	0.082225	0.077314	0.154105	0.117631	0.117033	0.034318	0.154105	0.442569	0.0761249	0.0761249	0.00883506
221	0.160211	0.0483535	0.0128482	0.266243	0.230911	-0.167616	0.0570213	0.131811	0.0895579	-0.0710508	0.0768792	-0.0370618	0.0749148	0.361589	0.186926	0.0174197	0.0278908	0.246047	0.107891	0.12702	0.0699927	0.246047	0.26411	0.160211	0.0483535	0.0128482	0.266243	0.230911	-0.167616	0.0570213	0.131811	0.0895579	-0.0710508	0.0768792	-0.0370618	0.0749148	0.361589	0.186926	0.0174197	0.0278908	0.246047	0.107891	0.12702	0.0699927	0.246047	0.26411	0.057234	0.057234	-0.0135702
222	0.211945	-0.00298234	0.0007541	0.267492	0.205158	-0.0779263	0.0222461	0.0920353	0.290385	-0.0603233	0.0684437	-0.078392	0.170657	0.347445	0.157882	0.0921073	0.0683344	0.229156	0.0930378	0.0902585	0.0377878	0.229156	0.317521	0.211945	-0.00298234	0.0007541	0.267492	0.205158	-0.0779263	0.0222461	0.0920353	0.290385	-0.0603233	0.0684437	-0.078392	0.170657	0.347445	0.157882	0.0921073	0.0683344	0.229156	0.0930378	0.0902585	0.0377878	0.229156	0.317521	0.0843159	0.0843159	-0.00155013
223	0.212546	0.0463857	0.0238002	0.208926	0.253017	-0.0515992	0.0295707	0.202176	0.104266	-0.119128	0.0377467	0.0227331	0.0765138	0.316732	0.164179	0.103853	0.00683316	0.15202	0.1814	0.0921098	0.115486	0.15202	0.432195	0.212546	0.0463857	0.0238002	0.208926	0.253017	-0.0515992	0.0295707	0.202176	0.104266	-0.119128	0.0377467	0.0227331	0.0765138	0.316732	0.164179	0.103853	0.00683316	0.15202	0.1814	0.0921098	0.115486	0.15202	0.432195	0.064895	0.064895	0.001741
224	0.156814	0.0674216	-0.00112002	0.13857	0.235149	-0.0846545	0.0431112	0.155011	0.311363	-0.0959505	0.0114671	0.0332565	0.142588	0.321041	0.224683	0.0782538	-0.027927	0.155858	0.115156	0.066874	0.0331543	0.155858	0.356673	0.156814	0.0674216	-0.00112002	0.13857	0.235149	-0.0846545	0.0431112	0.155011	0.311363	-0.0959505	0.0114671	0.0332565	0.142588	0.321041	0.224683	0.0782538	-0.027927	0.155858	0.115156	0.066874	0.0331543	0.155858	0.356673	0.105508	0.105508	0.00845264
225	0.170481	0.033752	0.00533187	0.353549	0.230911	-0.130277	0.0323407	0.23214	0.148583	0.0541479	0.0618052	0.0967379	0.211318	0.392576	0.198395	0.130615	-0.0095298	0.092184	0.144512	0.121348	0.132486	0.092184	0.348774	0.170481	0.033752	0.00533187	0.353549	0.230911	-0.130277	0.0323407	0.23214	0.148583	0.0541479	0.0618052	0.0967379	0.211318	0.392576	0.198395	0.130615	-0.0095298	0.092184	0.144512	0.121348	0.132486	0.092184	0.348774	0.0712747	0.0712747	-0.00934649
226	0.162736	-0.00565536	0.0171206	0.228756	0.00891321	-0.178628	0.0362372	0.137798	0.200409	0.182937	0.0252682	-0.13653	0.0950622	0.342436	0.172027	0.146487	0.0804689	0.217005	0.139158	0.134015	0.100452	0.217005	0.356453	0.162736	-0.00565536	0.0171206	0.228756	0.00891321	-0.178628	0.0362372	0.137798	0.200409	0.182937	0.0252682	-0.13653	0.0950622	0.342436	0.172027	0.146487	0.0804689	0.217005	0.139158	0.134015	0.100452	0.217005	0.356453	0.0334258	0.0334258	0.0088635
227	0.189968	0.0707999	0.00217279	0.289007	0.215345	-0.0828159	0.0443123	0.197966	0.145783	-0.0638991	0.00901503	0.0238374	0.108771	0.345813	0.184703	0.0841003	0.0830163	0.0559749	0.196199	0.126061	0.010468	0.0559749	0.318712	0.189968	0.0707999	0.00217279	0.289007	0.215345	-0.0828159	0.0443123	0.197966	0.145783	-0.0638991	0.00901503	0.0238374	0.108771	0.345813	0.184703	0.0841003	0.0830163	0.0559749	0.196199	0.126061	0.010468	0.0559749	0.318712	0.114437	0.114437	0.0101871
228	0.178248	0.0260551	0.0385203	0.269503	0.220154	-0.132419	0.0633945	0.00725333	0.217091	-0.00909366	-0.0224744	0.169086	0.167267	0.338423	0.15255	0.129853	0.0185674	0.247158	0.0682841	0.0947139	0.0321312	0.247158	0.356453	0.178248	0.0260551	0.0385203	0.269503	0.220154	-0.132419	0.0633945	0.00725333	0.217091	-0.00909366	-0.0224744	0.169086	0.167267	0.338423	0.15255	0.129853	0.0185674	0.247158	0.0682841	0.0947139	0.0321312	0.247158	0.356453	0.0895585	0.0895585	0.00213338
229	0.107401	0.115693	0.00691864	0.287974	0.211882	-0.177112	0.0667173	0.199249	0.16044	0.00306425	-0.00494213	0.0024334	0.1284	0.353634	0.188817	0.0923535	0.0670347	0.0876749	0.0827873	0.0467606	0.0752883	0.0876749	0.43811	0.107401	0.115693	0.00691864	0.287974	0.211882	-0.177112	0.0667173	0.199249	0.16044	0.00306425	-0.00494213	0.0024334	0.1284	0.353634	0.188817	0.0923535	0.0670347	0.0876749	0.0827873	0.0467606	0.0752883	0.0876749	0.43811	0.0662937	0.0662937	-0.000732676
230	0.119177	0.0158855	0.00829577	0.219303	0.072542	-0.174041	0.0460288	0.191728	0.196177	0.0339772	0.0162276	0.115933	0.12812	0.391192	0.184642	0.165956	0.0624202	0.0827941	0.0629569	0.0804873	-0.0075857	0.0827941	0.36153	0.119177	0.0158855	0.00829577	0.219303	0.072542	-0.174041	0.0460288	0.191728	0.196177	0.0339772	0.0162276	0.115933	0.12812	0.391192	0.184642	0.165956	0.0624202	0.0827941	0.0629569	0.0804873	-0.0075857	0.0827941	0.36153	0.100577	0.100577	-0.0102279
231	0.136999	0.0625893	0.0133796	0.246739	0.158073	-0.174041	0.0930998	0.196059	0.215168	0.0273947	0.00157163	0.124979	0.122291	0.308276	0.209934	0.0879679	0.0591852	0.108878	0.202927	0.145572	0.0962796	0.108878	0.39675	0.136999	0.0625893	0.0133796	0.246739	0.158073	-0.174041	0.0930998	0.196059	0.215168	0.0273947	0.00157163	0.124979	0.122291	0.308276	0.209934	0.0879679	0.0591852	0.108878	0.202927	0.145572	0.0962796	0.108878	0.39675	0.0719992	0.0719992	-0.0157255
232	0.183525	0.0699901	0.0392974	0.198929	0.0852148	-0.145876	0.0487323	0.209314	0.180308	0.106385	-0.0071009	0.0876923	0.0909157	0.397768	0.15283	0.114253	0.0283664	0.12335	0.13773	0.0898499	0.0352704	0.12335	0.463049	0.183525	0.0699901	0.0392974	0.198929	0.0852148	-0.145876	0.0487323	0.209314	0.180308	0.106385	-0.0071009	0.0876923	0.0909157	0.397768	0.15283	0.114253	0.0283664	0.12335	0.13773	0.0898499	0.0352704	0.12335	0.463049	0.0681184	0.0681184	-0.000765374
233	0.18374	0.145235	-0.00144171	0.340347	0.143261	0.0099451	0.0855045	0.0693405	0.166581	0.0249573	0.0418396	-0.039449	0.133647	0.368822	0.185166	0.122	0.0692902	0.231545	0.0997927	0.0655609	0.0536645	0.231545	0.382496	0.18374	0.145235	-0.00144171	0.340347	0.143261	0.0099451	0.0855045	0.0693405	0.166581	0.0249573	0.0418396	-0.039449	0.133647	0.368822	0.185166	0.122	0.0692902	0.231545	0.0997927	0.0655609	0.0536645	0.231545	0.382496	0.0928959	0.0928959	-0.00650317
234	0.124487	0.0433645	0.00174267	0.253856	0.230524	-0.305374	0.0468165	0.0303318	0.168064	-0.041145	0.00374912	0.264852	0.120368	0.379768	0.207208	0.129866	-0.0213441	0.162418	0.109479	0.112093	0.0658404	0.162418	0.406464	0.124487	0.0433645	0.00174267	0.253856	0.230524	-0.305374	0.0468165	0.0303318	0.168064	-0.041145	0.00374912	0.264852	0.120368	0.379768	0.207208	0.129866	-0.0213441	0.162418	0.109479	0.112093	0.0658404	0.162418	0.406464	0.0876198	0.0876198	-0.006951
235	0.180434	0.0193595	0.0232526	0.290691	0.180546	-0.0215949	0.0598724	0.121736	0.168013	-0.0819244	0.0357689	0.0891701	0.0977808	0.331172	0.264513	0.0993381	0.00677666	0.183049	0.222891	0.10469	0.0372261	0.183049	0.321008	0.180434	0.0193595	0.0232526	0.290691	0.180546	-0.0215949	0.0598724	0.121736	0.168013	-0.0819244	0.0357689	0.0891701	0.0977808	0.331172	0.264513	0.0993381	0.00677666	0.183049	0.222891	0.10469	0.0372261	0.183049	0.321008	0.114849	0.114849	0.0179095
236	0.166869	0.0155372	-0.000876042	0.257116	0.130955	-0.236798	0.0735686	-0.00969649	0.206498	-0.0123776	-0.0102704	0.216506	0.130086	0.425103	0.236866	0.114188	-0.0260717	0.189374	0.148118	0.100632	0.078156	0.189374	0.420324	0.166869	0.0155372	-0.000876042	0.257116	0.130955	-0.236798	0.0735686	-0.00969649	0.206498	-0.0123776	-0.0102704	0.216506	0.130086	0.425103	0.236866	0.114188	-0.0260717	0.189374	0.148118	0.100632	0.078156	0.189374	0.420324	0.0705837	0.0705837	0.018589
237	0.189266	0.0976693	0.0125013	0.226691	0.0448534	-0.103324	0.0442085	-0.00141893	0.239707	0.091366	-0.0143447	-0.00310436	0.135958	0.353068	0.201021	0.156875	0.00863191	0.06348	0.0849398	0.14046	0.0854574	0.06348	0.451838	0.189266	0.0976693	0.0125013	0.226691	0.0448534	-0.103324	0.0442085	-0.00141893	0.239707	0.091366	-0.0143447	-0.00310436	0.135958	0.353068	0.201021	0.156875	0.00863191	0.06348	0.0849398	0.14046	0.0854574	0.06348	0.451838	0.0862378	0.0862378	-0.0105236
238	0.162159	0.107787	0.0128049	0.418092	0.186516	-0.298039	0.0445116	0.0401443	0.14221	0.0402824	0.0308835	0.0902744	0.0802493	0.369775	0.233225	0.118909	0.0863454	0.204619	0.156809	0.097738	0.0538446	0.204619	0.426413	0.162159	0.107787	0.0128049	0.418092	0.186516	-0.298039	0.0445116	0.0401443	0.14221	0.0402824	0.0308835	0.0902744	0.0802493	0.369775	0.233225	0.118909	0.0863454	0.204619	0.156809	0.097738	0.0538446	0.204619	0.426413	0.0837389	0.0837389	0.00159742
239	0.156543	0.0480488	0.0125266	0.2086	0.130955	-0.0626109	0.0651321	0.0551864	0.146274	-0.166782	-0.0035695	-0.103125	0.159688	0.386818	0.169159	0.0951866	0.016844	0.138693	0.194369	0.115343	0.047466	0.138693	0.418775	0.156543	0.0480488	0.0125266	0.2086	0.130955	-0.0626109	0.0651321	0.0551864	0.146274	-0.166782	-0.0035695	-0.103125	0.159688	0.386818	0.169159	0.0951866	0.016844	0.138693	0.194369	0.115343	0.047466	0.138693	0.418775	0.0836719	0.0836719	0.00409526
240	0.17415	0.048902	0.00715539	0.148295	0.0202413	-0.105163	0.0714696	-0.0105955	0.124805	0.00493245	-0.0116555	0.0684969	0.120908	0.385552	0.159612	0.0733907	0.0414614	0.233093	0.123147	0.0589215	0.136016	0.233093	0.393483	0.17415	0.048902	0.00715539	0.148295	0.0202413	-0.105163	0.0714696	-0.0105955	0.124805	0.00493245	-0.0116555	0.0684969	0.120908	0.385552	0.159612	0.0733907	0.0414614	0.233093	0.123147	0.0589215	0.136016	0.233093	0.393483	0.0889682	0.0889682	0.00277881
241	0.163834	-0.0133522	0.0433167	0.286236	0.220541	-0.209865	0.0816582	0.0558223	0.112342	0.176778	-0.0520234	0.0895436	0.120973	0.331399	0.223324	0.130435	-0.0527892	0.227002	0.13426	0.0960049	0.0510065	0.227002	0.323084	0.163834	-0.0133522	0.0433167	0.286236	0.220541	-0.209865	0.0816582	0.0558223	0.112342	0.176778	-0.0520234	0.0895436	0.120973	0.331399	0.223324	0.130435	-0.0527892	0.227002	0.13426	0.0960049	0.0510065	0.227002	0.323084	0.092158	0.092158	0.00616804
242	0.19418	0.075728	0.0114205	0.251737	0.154039	-0.101788	0.0533971	0.0383572	0.173496	-0.0126695	-0.0470445	0.133456	0.110112	0.386548	0.175669	0.115974	0.0355849	0.198935	0.119138	0.0416928	0.039102	0.198935	0.434311	0.19418	0.075728	0.0114205	0.251737	0.154039	-0.101788	0.0533971	0.0383572	0.173496	-0.0126695	-0.0470445	0.133456	0.110112	0.386548	0.175669	0.115974	0.0355849	0.198935	0.119138	0.0416928	0.039102	0.198935	0.434311	0.0520048	0.0520048	0.00926867
243	0.190874	0.106681	0.0260647	0.251737	0.226694	-0.138541	0.0386101	0.0874415	0.141939	0.0248259	-0.0409487	-0.0859598	0.0954283	0.392759	0.153415	0.119039	0.0322935	0.192067	0.0638439	0.10653	0.0550182	0.192067	0.527186	0.190874	0.106681	0.0260647	0.251737	0.226694	-0.138541	0.0386101	0.0874415	0.141939	0.0248259	-0.0409487	-0.0859598	0.0954283	0.392759	0.153415	0.119039	0.0322935	0.192067	0.0638439	0.10653	0.0550182	0.192067	0.527186	0.0551778	0.0551778	0.0104415
244	0.151085	0.108396	0.0412655	0.236688	0.117325	-0.241405	0.0592095	0.0896123	0.125192	0.134422	0.0813839	0.00391122	0.102791	0.308733	0.176201	0.0894047	0.0484869	0.143339	0.163131	0.090915	0.0963997	0.143339	0.586154	0.151085	0.108396	0.0412655	0.236688	0.117325	-0.241405	0.0592095	0.0896123	0.125192	0.134422	0.0813839	0.00391122	0.102791	0.308733	0.176201	0.0894047	0.0484869	0.143339	0.163131	0.090915	0.0963997	0.143339	0.586154	0.0907928	0.0907928	0.00732527
245	0.177943	0.0105046	-0.0131545	0.229951	0.299919	-0.163333	0.0694727	0.0490687	0.142816	0.191519	-0.00917233	0.0766168	0.0840059	0.378658	0.205065	0.0809578	0.0770267	0.127859	0.129578	0.128634	0.0177891	0.127859	0.498183	0.177943	0.0105046	-0.0131545	0.229951	0.299919	-0.163333	0.0694727	0.0490687	0.142816	0.191519	-0.00917233	0.0766168	0.0840059	0.378658	0.205065	0.0809578	0.0770267	0.127859	0.129578	0.128634	0.0177891	0.127859	0.498183	0.0979138	0.0979138	0.00320389
246	0.149262	0.11322	-0.000850741	0.246576	0.0298579	-0.0809772	0.062871	0.0118471	0.26293	-0.0711968	0.0296731	0.086588	0.145049	0.408331	0.170729	0.0694975	0.0763911	0.0862303	0.15705	0.142645	0.0700429	0.0862303	0.410789	0.149262	0.11322	-0.000850741	0.246576	0.0298579	-0.0809772	0.062871	0.0118471	0.26293	-0.0711968	0.0296731	0.086588	0.145049	0.408331	0.170729	0.0694975	0.0763911	0.0862303	0.15705	0.142645	0.0700429	0.0862303	0.410789	0.0922083	0.0922083	0.0198387
247	0.172327	0.00375679	0.000128791	0.176003	0.0967467	0.0506581	0.0564022	0.135122	0.248003	0.0116609	-0.0391768	-0.00623864	0.143882	0.384599	0.218335	0.119814	0.0704203	0.180963	0.140663	0.159304	0.0998201	0.180963	0.338794	0.172327	0.00375679	0.000128791	0.176003	0.0967467	0.0506581	0.0564022	0.135122	0.248003	0.0116609	-0.0391768	-0.00623864	0.143882	0.384599	0.218335	0.119814	0.0704203	0.180963	0.140663	0.159304	0.0998201	0.180963	0.338794	0.0667868	0.0667868	-0.00227091
248	0.122302	0.00748335	0.0165802	0.256572	0.200554	-0.130277	0.053603	0.116386	0.186952	-0.0697665	0.00296298	0.0991413	0.0910237	0.35554	0.158415	0.112079	0.0414614	0.168513	0.129068	0.107165	0.101706	0.168513	0.469844	0.122302	0.00748335	0.0165802	0.256572	0.200554	-0.130277	0.053603	0.116386	0.186952	-0.0697665	0.00296298	0.0991413	0.0910237	0.35554	0.158415	0.112079	0.0414614	0.168513	0.129068	0.107165	0.101706	0.168513	0.469844	0.0666895	0.0666895	0.00163011
249	0.206205	0.0802556	0.00767046	0.350398	0.212839	-0.247527	0.0383962	0.0961138	0.129411	-0.0202591	0.0712826	0.0804981	0.134229	0.372539	0.195096	0.15095	0.0392577	0.222121	0.157831	0.103194	0.0805838	0.222121	0.354111	0.206205	0.0802556	0.00767046	0.350398	0.212839	-0.247527	0.0383962	0.0961138	0.129411	-0.0202591	0.0712826	0.0804981	0.134229	0.372539	0.195096	0.15095	0.0392577	0.222121	0.157831	0.103194	0.0805838	0.222121	0.354111	0.0996547	0.0996547	0.00851661
250	0.160675	0.002503	0.0467469	0.263798	0.0957891	-0.213239	0.0656037	0.0280295	0.208421	-0.00794063	-0.0254006	0.193803	0.141832	0.371473	0.24407	0.0798964	0.0653867	0.112208	0.0774331	0.0864817	0.0658807	0.112208	0.399577	0.160675	0.002503	0.0467469	0.263798	0.0957891	-0.213239	0.0656037	0.0280295	0.208421	-0.00794063	-0.0254006	0.193803	0.141832	0.371473	0.24407	0.0798964	0.0653867	0.112208	0.0774331	0.0864817	0.0658807	0.112208	0.399577	0.102204	0.102204	0.00864172
251	0.166495	0.050417	0.0350504	0.276565	0.247638	0.00321684	0.0912796	0.0579931	0.164	-0.00680219	0.0282319	-0.106259	0.208963	0.41062	0.214764	0.141947	0.0411742	0.118503	0.190064	0.138975	0.112647	0.118503	0.409286	0.166495	0.050417	0.0350504	0.276565	0.247638	0.00321684	0.0912796	0.0579931	0.164	-0.00680219	0.0282319	-0.106259	0.208963	0.41062	0.214764	0.141947	0.0411742	0.118503	0.190064	0.138975	0.112647	0.118503	0.409286	0.0964011	0.0964011	0.0198301
252	0.220075	0.12143	0.0308611	0.268416	0.28857	-0.110072	0.0434208	0.0922875	0.177341	0.000641426	-0.0139828	-0.0759885	0.162496	0.436528	0.191886	0.0622277	0.0765465	0.223399	0.175238	0.0366779	0.103601	0.223399	0.335706	0.220075	0.12143	0.0308611	0.268416	0.28857	-0.110072	0.0434208	0.0922875	0.177341	0.000641426	-0.0139828	-0.0759885	0.162496	0.436528	0.191886	0.0622277	0.0765465	0.223399	0.175238	0.0366779	0.103601	0.223399	0.335706	0.108154	0.108154	-0.0117192
253	0.207394	0.0740214	0.0160995	0.300742	0.230137	-0.194549	0.0534992	0.0717635	0.177186	-0.0387076	0.0107558	0.126814	0.197843	0.396249	0.207631	0.0909571	0.0463585	0.171441	0.0680425	0.102268	0.0632226	0.171441	0.401075	0.207394	0.0740214	0.0160995	0.300742	0.230137	-0.194549	0.0534992	0.0717635	0.177186	-0.0387076	0.0107558	0.126814	0.197843	0.396249	0.207631	0.0909571	0.0463585	0.171441	0.0680425	0.102268	0.0632226	0.171441	0.401075	0.0971558	0.0971558	-0.00192402
254	0.280245	0.046586	0.0161411	0.207948	0.137495	-0.189357	0.0789838	0.0193682	0.191455	-0.0381384	-0.0307788	0.102828	0.132999	0.471458	0.271756	0.088007	0.0356414	0.202333	0.0415112	0.12236	0.104834	0.202333	0.542058	0.280245	0.046586	0.0161411	0.207948	0.137495	-0.189357	0.0789838	0.0193682	0.191455	-0.0381384	-0.0307788	0.102828	0.132999	0.471458	0.271756	0.088007	0.0356414	0.202333	0.0415112	0.12236	0.104834	0.202333	0.542058	0.0903669	0.0903669	0.0055482
255	0.187658	0.115989	0.0277111	0.255431	0.0431216	-0.248739	0.0568738	0.105159	0.142816	-0.0445749	0.00638208	-0.0204485	0.160681	0.456473	0.158435	0.106504	0.049019	0.24921	0.119327	0.0846524	0.0992181	0.24921	0.468213	0.187658	0.115989	0.0277111	0.255431	0.0431216	-0.248739	0.0568738	0.105159	0.142816	-0.0445749	0.00638208	-0.0204485	0.160681	0.456473	0.158435	0.106504	0.049019	0.24921	0.119327	0.0846524	0.0992181	0.24921	0.468213	0.0613932	0.0613932	-0.00383899
256	0.142853	0.145784	0.0322292	0.209469	0.266851	-0.102718	0.0967175	0.00521409	0.19321	0.195095	0.00464757	0.28054	0.157746	0.475971	0.187872	0.130668	0.0949012	0.340549	0.111713	0.0874391	0.0486494	0.340549	0.460488	0.142853	0.145784	0.0322292	0.209469	0.266851	-0.102718	0.0967175	0.00521409	0.19321	0.195095	0.00464757	0.28054	0.157746	0.475971	0.187872	0.130668	0.0949012	0.340549	0.111713	0.0874391	0.0486494	0.340549	0.460488	0.0728042	0.0728042	0.0133858
257	0.191757	-0.00791915	0.0180658	0.224247	0.241669	-0.138541	0.0581932	0.0893492	0.291211	-0.0580318	-0.0106697	0.0386157	0.190414	0.430409	0.222843	0.105431	0.0290397	0.144044	0.113998	0.146164	0.0805534	0.144044	0.330629	0.191757	-0.00791915	0.0180658	0.224247	0.241669	-0.138541	0.0581932	0.0893492	0.291211	-0.0580318	-0.0106697	0.0386157	0.190414	0.430409	0.222843	0.105431	0.0290397	0.144044	0.113998	0.146164	0.0805534	0.144044	0.330629	0.0722139	0.0722139	0.00238217
258	0.182925	0.0373306	0.0388076	0.280368	0.0515769	-0.0950601	0.0761036	-0.041831	0.208524	-0.0291185	0.023802	0.0238374	0.170831	0.401937	0.234189	0.134522	0.0138775	0.131022	0.128179	0.154784	0.0667532	0.131022	0.437359	0.182925	0.0373306	0.0388076	0.280368	0.0515769	-0.0950601	0.0761036	-0.041831	0.208524	-0.0291185	0.023802	0.0238374	0.170831	0.401937	0.234189	0.134522	0.0138775	0.131022	0.128179	0.154784	0.0667532	0.131022	0.437359	0.0836081	0.0836081	-0.00283815
259	0.181158	0.0525763	0.00218906	0.221856	0.0752314	-0.19364	0.0681971	-0.0576406	0.196061	0.0590228	-0.045728	0.197311	0.140362	0.515226	0.232813	0.109105	0.0557572	0.199068	0.175669	0.119702	0.11339	0.199068	0.45263	0.181158	0.0525763	0.00218906	0.221856	0.0752314	-0.19364	0.0681971	-0.0576406	0.196061	0.0590228	-0.045728	0.197311	0.140362	0.515226	0.232813	0.109105	0.0557572	0.199068	0.175669	0.119702	0.11339	0.199068	0.45263	0.0378802	0.0378802	0.0108197
260	0.165069	0.0454802	-0.00564719	0.251791	0.216873	-0.0990405	0.0708212	0.0550658	0.213027	0.109391	-0.00276464	0.0633326	0.137362	0.442329	0.217531	0.143383	0.0616715	0.278187	0.0775935	0.134036	0.0656594	0.278187	0.335839	0.165069	0.0454802	-0.00564719	0.251791	0.216873	-0.0990405	0.0708212	0.0550658	0.213027	0.109391	-0.00276464	0.0633326	0.137362	0.442329	0.217531	0.143383	0.0616715	0.278187	0.0775935	0.134036	0.0656594	0.278187	0.335839	0.0494254	0.0494254	0.00163438
261	0.169054	0.0410484	0.0374558	0.194963	0.150759	-0.192105	0.0450643	0.0789008	0.188656	-0.00909366	-0.0289881	0.0548554	0.145307	0.453753	0.206635	0.123308	0.0770267	0.172518	0.0845089	0.105293	0.0620293	0.172518	0.36338	0.169054	0.0410484	0.0374558	0.194963	0.150759	-0.192105	0.0450643	0.0789008	0.188656	-0.00909366	-0.0289881	0.0548554	0.145307	0.453753	0.206635	0.123308	0.0770267	0.172518	0.0845089	0.105293	0.0620293	0.172518	0.36338	0.0694835	0.0694835	-0.00279123
262	0.150802	0.0839821	0.0133543	0.261027	0.204201	0.024028	0.0662893	0.100444	0.156982	-0.0372772	-0.0199849	0.147861	0.143774	0.441585	0.243698	0.157689	0.0673408	0.170261	0.16184	0.0989752	0.0755087	0.170261	0.440493	0.150802	0.0839821	0.0133543	0.261027	0.204201	0.024028	0.0662893	0.100444	0.156982	-0.0372772	-0.0199849	0.147861	0.143774	0.441585	0.243698	0.157689	0.0673408	0.170261	0.16184	0.0989752	0.0755087	0.170261	0.440493	0.0692689	0.0692689	0.00296931
263	0.159	0.0685796	-0.00642431	0.249075	0.282417	-0.0598631	0.0621789	0.149529	0.212369	0.0691811	0.0136258	0.289959	0.155952	0.370363	0.240298	0.108859	0.0572311	0.224173	0.166601	0.031318	0.0451796	0.224173	0.459962	0.159	0.0685796	-0.00642431	0.249075	0.282417	-0.0598631	0.0621789	0.149529	0.212369	0.0691811	0.0136258	0.289959	0.155952	0.370363	0.240298	0.108859	0.0572311	0.224173	0.166601	0.031318	0.0451796	0.224173	0.459962	0.0797441	0.0797441	0.00870569
264	0.137475	0.092184	0.0215122	0.339913	0.0794489	-0.137915	0.0691194	0.163935	0.273032	-0.0133847	-0.00411855	0.00613608	0.136303	0.482338	0.244573	0.151377	0.0540574	0.175646	0.267154	0.107703	0.062952	0.175646	0.40902	0.137475	0.092184	0.0215122	0.339913	0.0794489	-0.137915	0.0691194	0.163935	0.273032	-0.0133847	-0.00411855	0.00613608	0.136303	0.482338	0.244573	0.151377	0.0540574	0.175646	0.267154	0.107703	0.062952	0.175646	0.40902	0.120568	0.120568	-0.0018174
265	0.202321	0.0594722	0.0236918	0.320354	0.0781042	0.0974932	0.0699444	-0.0422147	0.127269	0.0747565	0.0619113	0.163353	0.199118	0.361411	0.243436	0.126943	0.0613089	0.193682	0.0907248	0.152255	0.0661208	0.193682	0.536849	0.202321	0.0594722	0.0236918	0.320354	0.0781042	0.0974932	0.0699444	-0.0422147	0.127269	0.0747565	0.0619113	0.163353	0.199118	0.361411	0.243436	0.126943	0.0613089	0.193682	0.0907248	0.152255	0.0661208	0.193682	0.536849	0.117808	0.117808	0.0193909
266	0.164401	0.0901205	0.0263087	0.237775	0.0123768	-0.259771	0.0952879	0.0955985	0.171522	0.0557242	0.00669404	0.103201	0.145544	0.455842	0.244784	0.155413	0.0485623	0.169688	0.116986	0.140008	0.0468442	0.169688	0.42491	0.164401	0.0901205	0.0263087	0.237775	0.0123768	-0.259771	0.0952879	0.0955985	0.171522	0.0557242	0.00669404	0.103201	0.145544	0.455842	0.244784	0.155413	0.0485623	0.169688	0.116986	0.140008	0.0468442	0.169688	0.42491	0.0710801	0.0710801	0.0102425
267	0.167322	0.0393941	0.00285774	0.280749	0.157686	-0.123226	0.0831834	0.174263	0.156917	0.0560161	-0.0249576	0.224805	0.15984	0.410259	0.212651	0.156901	0.0199282	0.309114	0.240408	0.105788	0.0799621	0.309114	0.424071	0.167322	0.0393941	0.00285774	0.280749	0.157686	-0.123226	0.0831834	0.174263	0.156917	0.0560161	-0.0249576	0.224805	0.15984	0.410259	0.212651	0.156901	0.0199282	0.309114	0.240408	0.105788	0.0799621	0.309114	0.424071	0.0638921	0.0638921	0.0021476
268	0.143917	0.0861501	0.0194592	0.242719	0.1225	-0.0503667	0.0923931	0.0888449	0.135733	0.0671815	0.0179621	0.140293	0.173486	0.468328	0.17944	0.13645	0.00769487	0.277144	0.158718	0.141903	0.0585488	0.277144	0.486838	0.143917	0.0861501	0.0194592	0.242719	0.1225	-0.0503667	0.0923931	0.0888449	0.135733	0.0671815	0.0179621	0.140293	0.173486	0.468328	0.17944	0.13645	0.00769487	0.277144	0.158718	0.141903	0.0585488	0.277144	0.486838	0.0481575	0.0481575	0.0120807
269	0.16559	0.0538388	0.0165296	0.329971	0.249757	-0.221503	0.0959217	0.0231945	0.154776	-0.0906524	0.0380899	0.00927035	0.2092	0.482386	0.221695	0.100425	0.047644	0.266006	0.147121	0.093745	0.0564023	0.266006	0.390349	0.16559	0.0538388	0.0165296	0.329971	0.249757	-0.221503	0.0959217	0.0231945	0.154776	-0.0906524	0.0380899	0.00927035	0.2092	0.482386	0.221695	0.100425	0.047644	0.266006	0.147121	0.093745	0.0564023	0.266006	0.390349	0.0744344	0.0744344	0.00822091
270	0.123208	0.135466	0.0311232	0.224681	0.281663	-0.201601	0.0420869	0.302888	0.171909	0.0278325	0.0472054	0.136054	0.16474	0.356832	0.229773	0.135828	0.0283852	0.233529	0.178065	0.128903	0.0856079	0.233529	0.302383	0.123208	0.135466	0.0311232	0.224681	0.281663	-0.201601	0.0420869	0.302888	0.171909	0.0278325	0.0472054	0.136054	0.16474	0.356832	0.229773	0.135828	0.0283852	0.233529	0.178065	0.128903	0.0856079	0.233529	0.302383	0.0831486	0.0831486	0.017038
271	0.198981	0.104165	0.0232598	0.306827	0.307213	-0.154766	0.0931144	0.324432	0.134469	-0.0377151	-0.0409487	0.178489	0.181908	0.492835	0.20582	0.154197	0.053271	0.174266	0.214766	0.0765163	0.0611863	0.174266	0.42628	0.198981	0.104165	0.0232598	0.306827	0.307213	-0.154766	0.0931144	0.324432	0.134469	-0.0377151	-0.0409487	0.178489	0.181908	0.492835	0.20582	0.154197	0.053271	0.174266	0.214766	0.0765163	0.0611863	0.174266	0.42628	0.0848894	0.0848894	0.00575149
272	0.142457	0.0112099	0.00302582	0.292429	0.202856	-0.182608	0.0675941	0.129772	0.273148	0.0208122	-0.0163225	0.191221	0.238847	0.453505	0.227821	0.132633	0.0350293	0.188365	0.104905	0.0803584	0.0899207	0.188365	0.319152	0.142457	0.0112099	0.00302582	0.292429	0.202856	-0.182608	0.0675941	0.129772	0.273148	0.0208122	-0.0163225	0.191221	0.238847	0.453505	0.227821	0.132633	0.0350293	0.188365	0.104905	0.0803584	0.0899207	0.188365	0.319152	0.0725426	0.0725426	-0.00430103
273	0.197735	0.13753	0.00772106	0.292158	0.269541	-0.17099	0.0857622	0.194655	0.187223	-0.014961	0.01123	0.0864093	0.175062	0.414972	0.206505	0.131716	0.0822299	0.263784	0.167275	0.169161	0.057696	0.263784	0.296023	0.197735	0.13753	0.00772106	0.292158	0.269541	-0.17099	0.0857622	0.194655	0.187223	-0.014961	0.01123	0.0864093	0.175062	0.414972	0.206505	0.131716	0.0822299	0.263784	0.167275	0.169161	0.057696	0.263784	0.296023	0.0704865	0.0704865	0.012338
274	0.171534	0.0502603	0.0104825	0.204199	0.20689	-0.0231304	0.0402375	0.0722678	0.215388	0.0346923	-0.0108507	0.154876	0.239194	0.39151	0.259705	0.180015	0.093239	0.400483	0.168701	0.0756771	0.0893795	0.400483	0.403197	0.171534	0.0502603	0.0104825	0.204199	0.20689	-0.0231304	0.0402375	0.0722678	0.215388	0.0346923	-0.0108507	0.154876	0.239194	0.39151	0.259705	0.180015	0.093239	0.400483	0.168701	0.0756771	0.0893795	0.400483	0.403197	0.0679876	0.0679876	0.0204201
275	0.218048	0.0417537	0.0353287	0.284552	0.295681	0.0267758	0.0724259	-0.0039625	0.134688	0.0557242	-0.0162476	0.167787	0.153384	0.414837	0.201292	0.174363	0.00407854	0.22875	0.167167	0.101817	0.042682	0.22875	0.427558	0.218048	0.0417537	0.0353287	0.284552	0.295681	0.0267758	0.0724259	-0.0039625	0.134688	0.0557242	-0.0162476	0.167787	0.153384	0.414837	0.201292	0.174363	0.00407854	0.22875	0.167167	0.101817	0.042682	0.22875	0.427558	0.104112	0.104112	0.00941226
276	0.128315	0.0981221	0.00331317	0.323451	0.313957	-0.239243	0.0826162	0.236602	0.237243	-0.152186	0.0231219	0.257106	0.149366	0.37018	0.239743	0.117383	-0.0200021	0.221514	0.0684193	0.113428	0.0786281	0.221514	0.453867	0.128315	0.0981221	0.00331317	0.323451	0.313957	-0.239243	0.0826162	0.236602	0.237243	-0.152186	0.0231219	0.257106	0.149366	0.37018	0.239743	0.117383	-0.0200021	0.221514	0.0684193	0.113428	0.0786281	0.221514	0.453867	0.084544	0.084544	-0.0205904
277	0.193093	0.0805081	0.00276377	0.300796	0.205158	-0.0721073	0.0900721	-0.0149262	0.12327	-0.12628	-0.00325754	0.122023	0.20607	0.460486	0.240739	0.115508	0.0303017	0.127453	0.239546	0.128516	0.0546169	0.127453	0.420983	0.193093	0.0805081	0.00276377	0.300796	0.205158	-0.0721073	0.0900721	-0.0149262	0.12327	-0.12628	-0.00325754	0.122023	0.20607	0.460486	0.240739	0.115508	0.0303017	0.127453	0.239546	0.128516	0.0546169	0.127453	0.420983	0.105525	0.105525	0.0182052
278	0.191304	0.101997	0.0239954	0.304979	0.274349	-0.153533	0.0857768	-0.00472995	0.158904	0.11612	0.00133454	0.106514	0.106245	0.430204	0.259783	0.0827295	0.0551263	0.226464	0.160602	0.107596	0.0828002	0.226464	0.561967	0.191304	0.101997	0.0239954	0.304979	0.274349	-0.153533	0.0857768	-0.00472995	0.158904	0.11612	0.00133454	0.106514	0.106245	0.430204	0.259783	0.0827295	0.0551263	0.226464	0.160602	0.107596	0.0828002	0.226464	0.561967	0.09944	0.09944	-0.00334141
279	0.194089	-0.00791915	0.0158284	0.261136	0.370067	-0.133934	0.0952798	0.00496192	0.161807	-0.0359929	0.0323435	0.0725568	0.182187	0.459468	0.257278	0.137005	0.0462079	0.156734	0.256902	0.131346	0.0761806	0.156734	0.485647	0.194089	-0.00791915	0.0158284	0.261136	0.370067	-0.133934	0.0952798	0.00496192	0.161807	-0.0359929	0.0323435	0.0725568	0.182187	0.459468	0.257278	0.137005	0.0462079	0.156734	0.256902	0.131346	0.0761806	0.156734	0.485647	0.0722139	0.0722139	0.00776882
280	0.129345	0.0623455	0.0297714	0.280314	0.153265	-0.185679	0.0247956	-0.0168448	0.226922	-0.0721893	-0.0053664	0.132173	0.215506	0.475448	0.242984	0.155206	0.0464951	0.178911	0.199051	0.108402	0.0811348	0.178911	0.505422	0.129345	0.0623455	0.0297714	0.280314	0.153265	-0.185679	0.0247956	-0.0168448	0.226922	-0.0721893	-0.0053664	0.132173	0.215506	0.475448	0.242984	0.155206	0.0464951	0.178911	0.199051	0.108402	0.0811348	0.178911	0.505422	0.0912188	0.0912188	0.0110187
281	0.236018	0.0963633	-0.0103171	0.29721	0.287817	0.0858551	0.0592468	-0.0221951	0.200899	0.0429971	0.0244447	0.0214502	0.197519	0.543084	0.214109	0.133617	0.0748984	0.214548	0.169965	0.094886	0.0586492	0.214548	0.383861	0.236018	0.0963633	-0.0103171	0.29721	0.287817	0.0858551	0.0592468	-0.0221951	0.200899	0.0429971	0.0244447	0.0214502	0.197519	0.543084	0.214109	0.133617	0.0748984	0.214548	0.169965	0.094886	0.0586492	0.214548	0.383861	0.0799722	0.0799722	0.000845361
282	0.131587	0.11524	0.00541501	0.289713	0.22975	-0.0981313	0.0590474	0.0212758	0.23274	0.072757	0.0286312	-0.0580923	0.173528	0.514117	0.241444	0.133759	0.0408681	0.185237	0.171957	0.135112	0.102819	0.185237	0.462298	0.131587	0.11524	0.00541501	0.289713	0.22975	-0.0981313	0.0590474	0.0212758	0.23274	0.072757	0.0286312	-0.0580923	0.173528	0.514117	0.241444	0.133759	0.0408681	0.185237	0.171957	0.135112	0.102819	0.185237	0.462298	0.07213	0.07213	0.00132019
283	0.16765	0.157965	0.0401848	0.326276	0.227835	-0.111285	0.064521	0.0068696	0.218626	-0.157338	0.0119662	-0.0852127	0.136002	0.457448	0.223667	0.143344	0.0713998	0.199875	0.168862	0.054219	0.0780861	0.199875	0.419925	0.16765	0.157965	0.0401848	0.326276	0.227835	-0.111285	0.064521	0.0068696	0.218626	-0.157338	0.0119662	-0.0852127	0.136002	0.457448	0.223667	0.143344	0.0713998	0.199875	0.168862	0.054219	0.0780861	0.199875	0.419925	0.0433073	0.0433073	0.000126004
284	0.198924	0.091888	0.03331	0.214467	0.261473	-0.141895	0.0633718	0.0565898	0.224999	0.00207177	0.00733668	0.124232	0.139714	0.486081	0.238989	0.150898	-0.0361767	0.253655	0.205912	0.150243	0.0819778	0.253655	0.432195	0.198924	0.091888	0.03331	0.214467	0.261473	-0.141895	0.0633718	0.0565898	0.224999	0.00207177	0.00733668	0.124232	0.139714	0.486081	0.238989	0.150898	-0.0361767	0.253655	0.205912	0.150243	0.0819778	0.253655	0.432195	0.0400202	0.0400202	-0.0239369
285	0.150077	0.0888144	0.0133705	0.252661	0.120197	-0.148644	0.0857687	0.27025	0.18223	-0.0713428	0.0415651	0.00944899	0.192035	0.433742	0.278375	0.153369	0.0920524	0.181433	0.235054	0.101386	0.109218	0.181433	0.536276	0.150077	0.0888144	0.0133705	0.252661	0.120197	-0.148644	0.0857687	0.27025	0.18223	-0.0713428	0.0415651	0.00944899	0.192035	0.433742	0.278375	0.153369	0.0920524	0.181433	0.235054	0.101386	0.109218	0.181433	0.536276	0.0917287	0.0917287	0.00174527
286	0.165646	0.0989841	0.00871867	0.301394	0.0702194	-0.0463863	0.0607055	-0.0456463	0.111413	-0.00221926	0.0106996	0.146009	0.209158	0.420956	0.252853	0.170729	0.0677222	0.17854	0.212397	0.0338691	0.0897504	0.17854	0.420937	0.165646	0.0989841	0.00871867	0.301394	0.0702194	-0.0463863	0.0607055	-0.0456463	0.111413	-0.00221926	0.0106996	0.146009	0.209158	0.420956	0.252853	0.170729	0.0677222	0.17854	0.212397	0.0338691	0.0897504	0.17854	0.420937	0.0734616	0.0734616	0.00788398
287	0.23107	0.092036	0.0500903	0.342195	0.154997	-0.173435	0.0485346	0.100444	0.233282	-0.067475	0.0561337	0.128665	0.177048	0.471323	0.200931	0.178425	0.0437781	0.230366	0.151319	0.0907862	0.0800221	0.230366	0.400063	0.23107	0.092036	0.0500903	0.342195	0.154997	-0.173435	0.0485346	0.100444	0.233282	-0.067475	0.0561337	0.128665	0.177048	0.471323	0.200931	0.178425	0.0437781	0.230366	0.151319	0.0907862	0.0800221	0.230366	0.400063	0.0739715	0.0739715	-0.000105726
288	0.174489	0.0928893	0.0318063	0.375987	0.321434	-0.219361	0.0776872	0.082475	0.271613	-0.08064	0.034415	0.102454	0.238825	0.432811	0.239814	0.140447	0.0158505	0.325269	0.205939	0.129	0.0973726	0.325269	0.403504	0.174489	0.0928893	0.0318063	0.375987	0.321434	-0.219361	0.0776872	0.082475	0.271613	-0.08064	0.034415	0.102454	0.238825	0.432811	0.239814	0.140447	0.0158505	0.325269	0.205939	0.129	0.0973726	0.325269	0.403504	0.105474	0.105474	0.007557
289	0.223415	0.0367733	0.0309461	0.319159	0.29511	-0.226695	0.0953836	0.0771138	0.127721	0.0645982	-0.0196917	0.0917522	0.130647	0.426487	0.202923	0.151338	0.0570804	0.187763	0.184038	0.0759242	0.0876245	0.187763	0.419353	0.223415	0.0367733	0.0309461	0.319159	0.29511	-0.226695	0.0953836	0.0771138	0.127721	0.0645982	-0.0196917	0.0917522	0.130647	0.426487	0.202923	0.151338	0.0570804	0.187763	0.184038	0.0759242	0.0876245	0.187763	0.419353	0.108074	0.108074	0.00218883
290	0.204325	0.050417	0.0245267	0.306446	0.184213	-0.0479219	0.0545674	-0.00778882	0.253873	0.0810617	-0.00227174	0.0804981	0.175019	0.494262	0.188566	0.181581	-0.0212075	0.133005	0.0719707	0.121564	0.131824	0.133005	0.451306	0.204325	0.050417	0.0245267	0.306446	0.184213	-0.0479219	0.0545674	-0.00778882	0.253873	0.0810617	-0.00227174	0.0804981	0.175019	0.494262	0.188566	0.181581	-0.0212075	0.133005	0.0719707	0.121564	0.131824	0.133005	0.451306	0.0843461	0.0843461	0.00820811
291	0.173912	0.102301	0.0278792	0.371641	0.324898	-0.257629	0.072588	0.0632228	0.139513	-0.093659	0.0191912	0.305825	0.131919	0.404248	0.187418	0.109428	0.0356791	0.147711	0.200558	0.145551	0.10331	0.147711	0.487503	0.173912	0.102301	0.0278792	0.371641	0.324898	-0.257629	0.072588	0.0632228	0.139513	-0.093659	0.0191912	0.305825	0.131919	0.404248	0.187418	0.109428	0.0356791	0.147711	0.200558	0.145551	0.10331	0.147711	0.487503	0.0739715	0.0739715	0.0066514
292	0.17184	0.030783	0.0585772	0.308891	0.209579	-0.062914	0.110892	0.208294	0.143138	0.0412748	0.00466005	0.0686917	0.20538	0.421343	0.21431	0.127317	0.0862512	0.261968	0.196039	0.0955319	0.0752981	0.261968	0.408181	0.17184	0.030783	0.0585772	0.308891	0.209579	-0.062914	0.110892	0.208294	0.143138	0.0412748	0.00466005	0.0686917	0.20538	0.421343	0.21431	0.127317	0.0862512	0.261968	0.196039	0.0955319	0.0752981	0.261968	0.408181	0.0865833	0.0865833	0.00707648
293	0.188201	0.0248971	0.0161664	0.271676	0.120585	-0.27935	0.0935779	-0.0697445	0.169935	-0.157338	0.0304967	0.213746	0.10536	0.395231	0.220237	0.103025	0.0209783	0.194088	0.261771	0.108101	0.0730414	0.194088	0.380334	0.188201	0.0248971	0.0161664	0.271676	0.120585	-0.27935	0.0935779	-0.0697445	0.169935	-0.157338	0.0304967	0.213746	0.10536	0.395231	0.220237	0.103025	0.0209783	0.194088	0.261771	0.108101	0.0730414	0.194088	0.380334	0.0547686	0.0547686	0.0130588
294	0.216803	0.0743697	0.0261912	0.25554	0.196886	-0.0877055	0.0519594	0.0762257	0.157795	-0.133154	-0.0374361	-0.00661216	0.166231	0.448679	0.245448	0.162178	0.0136844	0.2621	0.155408	0.113654	0.060956	0.2621	0.500079	0.216803	0.0743697	0.0261912	0.25554	0.196886	-0.0877055	0.0519594	0.0762257	0.157795	-0.133154	-0.0374361	-0.00661216	0.166231	0.448679	0.245448	0.162178	0.0136844	0.2621	0.155408	0.113654	0.060956	0.2621	0.500079	0.112709	0.112709	-0.00275427
295	0.185835	0.0885097	-0.00449055	0.338663	0.23629	-0.0678238	0.072588	0.13487	0.204628	0.113113	-0.00955292	0.253598	0.225159	0.468398	0.25919	0.159681	0.0480255	0.139702	0.194236	0.0907756	0.0518387	0.139702	0.517472	0.185835	0.0885097	-0.00449055	0.338663	0.23629	-0.0678238	0.072588	0.13487	0.204628	0.113113	-0.00955292	0.253598	0.225159	0.468398	0.25919	0.159681	0.0480255	0.139702	0.194236	0.0907756	0.0518387	0.139702	0.517472	0.08231	0.08231	0.0214736
296	0.181645	0.0715051	0.0286491	0.280586	0.198822	-0.158746	0.0484827	0.104907	0.169329	-0.0751959	0.000617027	0.0729303	0.147662	0.500699	0.264121	0.125674	0.0659046	0.20388	0.245816	0.143506	0.0980149	0.20388	0.374592	0.181645	0.0715051	0.0286491	0.280586	0.198822	-0.158746	0.0484827	0.104907	0.169329	-0.0751959	0.000617027	0.0729303	0.147662	0.500699	0.264121	0.125674	0.0659046	0.20388	0.245816	0.143506	0.0980149	0.20388	0.374592	0.109241	0.109241	-0.0121614
297	0.191813	0.0729592	0.0468481	0.291343	0.334331	-0.247203	0.0500225	0.11268	0.267498	0.12241	-0.0144195	0.0814237	0.187522	0.529623	0.176483	0.08978	0.0599339	0.273306	0.149273	0.129796	0.0409269	0.273306	0.419971	0.191813	0.0729592	0.0468481	0.291343	0.334331	-0.247203	0.0500225	0.11268	0.267498	0.12241	-0.0144195	0.0814237	0.187522	0.529623	0.176483	0.08978	0.0599339	0.273306	0.149273	0.129796	0.0409269	0.273306	0.419971	0.0703053	0.0703053	0.00213765
298	0.199988	0.0992366	0.0385456	0.305305	0.225349	-0.0760876	0.0802805	0.033895	0.132495	0.0192359	-0.0221624	-0.0222836	0.170141	0.475971	0.286012	0.177881	0.0952073	0.193349	0.204649	0.133864	0.124622	0.193349	0.503392	0.199988	0.0992366	0.0385456	0.305305	0.225349	-0.0760876	0.0802805	0.033895	0.132495	0.0192359	-0.0221624	-0.0222836	0.170141	0.475971	0.286012	0.177881	0.0952073	0.193349	0.204649	0.133864	0.124622	0.193349	0.503392	0.0669679	0.0669679	0.00452461
299	0.144676	0.0976258	0.0305575	0.303567	0.214001	-0.116498	0.0811201	-0.0151783	0.138533	-0.0534489	-0.00494213	0.296974	0.182685	0.405454	0.237612	0.124769	0.0778272	0.271994	0.167409	0.136586	0.0820781	0.271994	0.467242	0.144676	0.0976258	0.0305575	0.303567	0.214001	-0.116498	0.0811201	-0.0151783	0.138533	-0.0534489	-0.00494213	0.296974	0.182685	0.405454	0.237612	0.124769	0.0778272	0.271994	0.167409	0.136586	0.0820781	0.271994	0.467242	0.0820786	0.0820786	-0.00128286
300	0.277086	0.10029	0.0115217	0.284769	0.177673	0.00137819	0.0129051	0.0141385	0.163562	0.0534327	0.0166456	0.103753	0.143407	0.494554	0.24246	0.149177	0.0677599	0.233832	0.160683	0.0941438	0.0773443	0.233832	0.348595	0.277086	0.10029	0.0115217	0.284769	0.177673	0.00137819	0.0129051	0.0141385	0.163562	0.0534327	0.0166456	0.103753	0.143407	0.494554	0.24246	0.149177	0.0677599	0.233832	0.160683	0.0941438	0.0773443	0.233832	0.348595	0.0956598	0.0956598	0.00557237
[truncated: 417 more columns]

## Sheet: Panel G
Genotype	Condition	Peak
WT	Pre	0.0628343
WT	Pre	0.0605257
WT	Pre	0.0480897
WT	Pre	0.0955416
WT	Pre	0.214775
WT	Pre	0.194538
WT	Pre	0.0345061
WT	Pre	0.193504
WT	Pre	0.0824749
WT	Pre	0.1805
WT	Pre	0.0726552
WT	Pre	0.228507
WT	Pre	0.0699912
WT	Pre	0.10049
WT	Pre	0.0430505
WT	Pre	0.0689661
WT	Pre	0.0990355
WT	Pre	0.103865
WT	Pre	0.0921238
WT	Pre	0.0464491
WT	Pre	0.085117
WT	Pre	0.103865
WT	Pre	0.154426
WT	Pre	0.0628343
WT	Pre	0.0605257
WT	Pre	0.0480897
WT	Pre	0.0955416
WT	Pre	0.214775
WT	Pre	0.194538
WT	Pre	0.0345061
WT	Pre	0.193504
WT	Pre	0.0824749
WT	Pre	0.1805
WT	Pre	0.0726552
WT	Pre	0.228507
WT	Pre	0.0699912
WT	Pre	0.10049
WT	Pre	0.0430505
WT	Pre	0.0689661
WT	Pre	0.0990355
WT	Pre	0.103865
WT	Pre	0.0921238
WT	Pre	0.0464491
WT	Pre	0.085117
WT	Pre	0.103865
WT	Pre	0.154426
WT	Pre	0.0476141
WT	Pre	0.0476141
WT	Pre	0.0287112
WT	Pre	0.0630288
WT	Pre	0.059328
WT	Pre	0.0328026
WT	Pre	0.0628343
WT	Pre	0.0605257
WT	Pre	0.0480897
WT	Pre	0.0955416
WT	Pre	0.214775
WT	Pre	0.194538
WT	Pre	0.0345061
WT	Pre	0.193504
WT	Pre	0.0824749
WT	Pre	0.1805
WT	Pre	0.0726552
WT	Pre	0.228507
WT	Pre	0.0699912
WT	Pre	0.10049
WT	Pre	0.0430505
WT	Pre	0.0689661
WT	Pre	0.0990355
WT	Pre	0.103865
WT	Pre	0.0921238
WT	Pre	0.0464491
WT	Pre	0.085117
WT	Pre	0.103865
WT	Pre	0.154426
WT	Pre	0.0476141
WT	Pre	0.0476141
WT	Pre	0.0287112
WT	Pre	0.0630288
WT	Pre	0.059328
WT	Pre	0.0328026
WT	Pre	0.13979
WT	Pre	0.0425454
WT	Pre	0.133806
WT	Pre	0.0878664
WT	Pre	0.15755
WT	Pre	0.0975935
WT	Pre	0.1058
WT	Pre	0.112148
WT	Pre	0.144472
WT	Pre	0.0502074
WT	Pre	0.0211904
WT	Pre	0.0487048
WT	Pre	0.0406307
WT	Pre	0.0868917
WT	Pre	0.0502332
WT	Pre	0.0482213
WT	Pre	0.13819
WT	Pre	0.0770623
WT	Pre	0.038836
WT	Pre	0.0288994
WT	Pre	0.0242959
WT	Pre	0.047651
WT	Pre	0.135476
WT	Pre	0.0564482
WT	Pre	0.0429334
WT	Pre	0.115077
WT	Pre	0.0311649
WT	Pre	0.0502074
WT	Pre	0.0483265
WT	Pre	0.0430789
WT	Pre	0.0518605
WT	Pre	0.0487048
WT	Pre	0.0868917
WT	Pre	0.0406307
WT	Pre	0.0542244
WT	Pre	0.0502332
WT	Pre	0.0482213
WT	Pre	0.0770623
WT	Pre	0.0288994
WT	Pre	0.0242959
WT	Pre	0.047651
WT	Pre	0.0347578
WT	Pre	0.0872075
WT	Pre	0.0352121
WT	Pre	0.0514066
WT	Pre	0.157786
WT	Pre	0.0461285
WT	Pre	0.0433154
WT	Pre	0.0631487
WT	Pre	0.0854615
WT	Pre	0.115545
WT	Pre	0.0340186
WT	Pre	0.0681575
WT	Pre	0.0718366
WT	Pre	0.0439604
WT	Pre	0.0565366
WT	Pre	0.0670177
WT	Pre	0.0494731
WT	Pre	0.0326134
WT	Pre	0.109629
WT	Pre	0.133303
WT	Pre	0.100687
WT	Pre	0.0480779
WT	Pre	0.0543136
WT	Pre	0.0608417
WT	Pre	0.134657
WT	Pre	0.0710023
WT	Pre	0.0375348
WT	Pre	0.059404
WT	Pre	0.0847787
WT	Pre	0.0493364
WT	Pre	0.0252574
WT	Pre	0.0582433
WT	Pre	0.0949014
WT	Pre	0.0332504
WT	Pre	0.0490077
WT	Pre	0.0688599
WT	Pre	0.0435464
WT	Pre	0.128539
WT	Pre	0.123518
WT	Pre	0.0754408
WT	Pre	0.10597
WT	Pre	0.0417225
WT	Pre	0.0302153
WT	Pre	0.107469
WT	Pre	0.0455981
WT	Post	2.80245
WT	Post	1.57965
WT	Post	1.05858
WT	Post	1.41809
WT	Post	1.37007
WT	Post	1.24107
WT	Post	1.11089
WT	Post	1.56143
WT	Post	1.31136
WT	Post	1.21112
WT	Post	1.26013
WT	Post	1.34051
WT	Post	2.23919
WT	Post	1.54308
WT	Post	1.28601
WT	Post	1.18158
WT	Post	1.12515
WT	Post	2.40048
WT	Post	2.26715
WT	Post	3.16916
WT	Post	3.13602
WT	Post	2.40048
WT	Post	1.58615
WT	Post	2.28025
WT	Post	1.15796
WT	Post	3.05858
WT	Post	3.41809
WT	Post	2.37007
WT	Post	2.24107
WT	Post	1.11089
WT	Post	3.56143
WT	Post	5.31136
WT	Post	4.21112
WT	Post	2.26013
WT	Post	3.34051
WT	Post	2.23919
WT	Post	2.54308
WT	Post	3.28601
WT	Post	4.18158
WT	Post	2.12515
WT	Post	1.40048
WT	Post	3.26715
WT	Post	2.16916
WT	Post	2.13602
WT	Post	1.40048
WT	Post	2.58615
WT	Post	3.12723
WT	Post	1.12723
WT	Post	1.02361
WT	Post	4.08663
WT	Post	5.14142
WT	Post	2.08928
WT	Post	3.28025
WT	Post	2.15796
WT	Post	2.05858
WT	Post	2.41809
WT	Post	2.37007
WT	Post	3.24107
WT	Post	2.11089
WT	Post	3.56143
WT	Post	2.31136
WT	Post	2.21112
WT	Post	3.26013
WT	Post	1.34051
WT	Post	2.23919
WT	Post	3.54308
WT	Post	4.28601
WT	Post	2.18158
WT	Post	3.12515
WT	Post	0.400483
WT	Post	0.267154
WT	Post	0.169161
WT	Post	0.136016
WT	Post	0.400483
WT	Post	0.586154
WT	Post	0.12723
WT	Post	0.12723
WT	Post	0.0236146
WT	Post	0.0866336
WT	Post	0.141415
WT	Post	0.089279
WT	Post	0.244291
WT	Post	0.0818063
WT	Post	0.19917
WT	Post	0.185567
WT	Post	0.277778
WT	Post	0.142275
WT	Post	0.174246
WT	Post	0.155125
WT	Post	0.194931
WT	Post	0.104995
WT	Post	0.0735102
WT	Post	0.437752
WT	Post	0.17569
WT	Post	0.188117
WT	Post	0.225058
WT	Post	0.189391
WT	Post	0.169958
WT	Post	0.167086
WT	Post	0.0719382
WT	Post	0.170055
WT	Post	0.106586
WT	Post	0.226277
WT	Post	0.159331
WT	Post	0.416158
WT	Post	0.193236
WT	Post	0.38902
WT	Post	-0.00235161
WT	Post	0.104995
WT	Post	0.0893268
WT	Post	0.084637
WT	Post	0.0891027
WT	Post	0.437752
WT	Post	0.188117
WT	Post	0.17569
WT	Post	0.09598
WT	Post	0.225058
WT	Post	0.189391
WT	Post	0.167086
WT	Post	0.170055
WT	Post	0.106586
WT	Post	0.226277
WT	Post	0.12857
WT	Post	0.253197
WT	Post	0.171974
WT	Post	0.148544
WT	Post	1.95019
WT	Post	0.304442
WT	Post	0.231174
WT	Post	0.214506
WT	Post	0.218301
WT	Post	0.304672
WT	Post	0.191491
WT	Post	0.226976
WT	Post	0.39351
WT	Post	0.310291
WT	Post	0.29732
WT	Post	0.337053
WT	Post	0.152519
WT	Post	0.126083
WT	Post	0.505204
WT	Post	0.368455
WT	Post	0.592898
WT	Post	0.430328
WT	Post	0.372867
WT	Post	0.345207
WT	Post	0.335021
WT	Post	0.359231
WT	Post	0.24926
WT	Post	0.265604
WT	Post	0.329647
WT	Post	2.23653
WT	Post	3.1937
WT	Post	2.23146
WT	Post	2.20893
WT	Post	1.16435
WT	Post	1.15012
WT	Post	1.1851
WT	Post	1.16076
WT	Post	1.54023
WT	Post	1.35213
WT	Post	0.764958
WT	Post	0.426246
WT	Post	0.362297
WT	Post	2.19186
WT	Post	1.08684
WT	Post	3.35642
E180A	Pre	0.119739
E180A	Pre	0.135476
E180A	Pre	0.0564482
E180A	Pre	0.0314391
E180A	Pre	0.0429334
E180A	Pre	0.115077
E180A	Pre	0.0311649
E180A	Pre	0.0502074
E180A	Pre	0.0387467
E180A	Pre	0.0311649
E180A	Pre	0.0455202
E180A	Pre	0.0417092
E180A	Pre	0.0493556
E180A	Pre	0.0483265
E180A	Pre	0.0430789
E180A	Pre	0.0797462
E180A	Pre	0.0862422
E180A	Pre	0.158779
E180A	Pre	0.0608626
E180A	Pre	0.075595
E180A	Pre	0.0471869
E180A	Pre	0.0518605
E180A	Pre	0.0339452
E180A	Pre	0.0312459
E180A	Pre	0.0519785
E180A	Pre	0.0211904
E180A	Pre	0.0362095
E180A	Pre	0.0487048
E180A	Pre	0.0993989
E180A	Pre	0.0773061
E180A	Pre	0.0542244
E180A	Pre	0.0406307
E180A	Pre	0.0868917
E180A	Pre	0.0526427
E180A	Pre	0.0542244
E180A	Pre	0.0624457
E180A	Pre	0.0495144
E180A	Pre	0.0482213
E180A	Pre	0.0502332
E180A	Pre	0.0614773
E180A	Pre	0.13819
E180A	Pre	0.0770623
E180A	Pre	0.038836
E180A	Pre	0.0288994
E180A	Pre	0.0242959
E180A	Pre	0.047651
E180A	Pre	0.0347578
E180A	Pre	0.0299873
E180A	Pre	0.0360224
E180A	Pre	0.0276846
E180A	Pre	0.0581218
E180A	Pre	0.0514066
E180A	Pre	0.0352121
E180A	Pre	0.0872075
E180A	Pre	0.0461285
E180A	Pre	0.0854615
E180A	Pre	0.0272245
E180A	Pre	0.157786
E180A	Pre	0.0433154
E180A	Pre	0.0631487
E180A	Pre	0.061027
E180A	Pre	0.051689
E180A	Pre	0.0594431
E180A	Pre	0.0340186
E180A	Pre	0.0958904
E180A	Pre	0.115545
E180A	Pre	0.0518225
E180A	Pre	0.0681575
E180A	Pre	0.077304
E180A	Pre	0.109906
E180A	Pre	0.0355137
E180A	Pre	0.0511504
E180A	Pre	0.0565366
E180A	Pre	0.0718366
E180A	Pre	0.0419871
E180A	Pre	0.0419871
E180A	Pre	0.0439604
E180A	Pre	0.112951
E180A	Pre	0.0670177
E180A	Pre	0.0158602
E180A	Pre	0.0494731
E180A	Pre	0.0188415
E180A	Pre	0.0267244
E180A	Pre	0.0326134
E180A	Pre	0.0299847
E180A	Pre	0.0448581
E180A	Pre	0.0478143
E180A	Pre	0.0928445
E180A	Pre	0.109629
E180A	Pre	0.133303
E180A	Pre	0.0406167
E180A	Pre	0.127642
E180A	Pre	0.14708
E180A	Pre	0.120082
E180A	Pre	0.215436
E180A	Pre	0.145258
E180A	Pre	0.0675681
E180A	Pre	0.0302165
E180A	Pre	0.100687
E180A	Pre	0.0412632
E180A	Pre	0.0339908
E180A	Pre	0.0306672
E180A	Pre	0.0543136
E180A	Pre	0.0290832
E180A	Pre	0.0480779
E180A	Pre	0.103189
E180A	Pre	0.0410914
E180A	Pre	0.0991244
E180A	Pre	0.0608417
E180A	Pre	0.0326476
E180A	Pre	0.0839436
E180A	Pre	0.0270891
E180A	Pre	0.0327773
E180A	Pre	0.134657
E180A	Pre	0.039454
E180A	Pre	0.0208231
E180A	Pre	0.0290496
E180A	Pre	0.059404
E180A	Pre	0.0375348
E180A	Pre	0.041024
E180A	Pre	0.0471346
E180A	Pre	0.0341515
E180A	Pre	0.0374516
E180A	Pre	0.0710023
E180A	Pre	0.0229035
E180A	Pre	0.0847787
E180A	Pre	0.0185318
E180A	Pre	0.0949014
E180A	Pre	0.066979
E180A	Pre	0.0582433
E180A	Pre	0.0252574
E180A	Pre	0.0493364
E180A	Pre	0.0688599
E180A	Pre	0.0688599
E180A	Pre	0.0513214
E180A	Pre	0.0205063
E180A	Pre	0.0435464
E180A	Pre	0.0312719
E180A	Pre	0.0445147
E180A	Pre	0.0490077
E180A	Pre	0.042162
E180A	Pre	0.0332504
E180A	Pre	0.0270109
E180A	Pre	0.0627931
E180A	Pre	0.0406845
E180A	Pre	0.0734015
E180A	Pre	0.128539
E180A	Pre	0.0522151
E180A	Pre	0.0170297
E180A	Pre	0.0451328
E180A	Pre	0.10597
E180A	Pre	0.0277802
E180A	Pre	0.0754408
E180A	Pre	0.123518
E180A	Pre	0.0302153
E180A	Pre	0.0417225
E180A	Pre	0.0455981
E180A	Pre	0.107469
E180A	Pre	0.0671273
E180A	Pre	0.0811454
E180A	Post	0.153767
E180A	Post	0.159331
E180A	Post	0.416158
E180A	Post	0.0351058
E180A	Post	0.193236
E180A	Post	0.38902
E180A	Post	-0.00235161
E180A	Post	0.104995
E180A	Post	0.00993232
E180A	Post	-0.00235161
E180A	Post	-0.000860497
E180A	Post	0.00698145
E180A	Post	-0.0045364
E180A	Post	0.0893268
E180A	Post	0.084637
E180A	Post	0.103769
E180A	Post	0.162826
E180A	Post	0.183775
E180A	Post	0.0798688
E180A	Post	0.0791937
E180A	Post	0.0756516
E180A	Post	0.0891027
E180A	Post	0.00220488
E180A	Post	0.103979
E180A	Post	0.0121026
E180A	Post	0.0735102
E180A	Post	0.00614277
E180A	Post	0.437752
E180A	Post	0.127329
E180A	Post	0.144941
E180A	Post	0.09598
E180A	Post	0.17569
E180A	Post	0.188117
E180A	Post	0.103603
E180A	Post	0.09598
E180A	Post	0.169808
E180A	Post	0.0149628
E180A	Post	0.189391
E180A	Post	0.225058
E180A	Post	0.0658864
E180A	Post	0.169958
E180A	Post	0.167086
E180A	Post	0.0719382
E180A	Post	0.170055
E180A	Post	0.106586
E180A	Post	0.226277
E180A	Post	0.12857
E180A	Post	0.0377205
E180A	Post	0.0908608
E180A	Post	0.0209396
E180A	Post	0.0813384
E180A	Post	0.148544
E180A	Post	0.171974
E180A	Post	0.253197
E180A	Post	0.304442
E180A	Post	0.218301
E180A	Post	0.0159663
E180A	Post	1.95019
E180A	Post	0.231174
E180A	Post	0.214506
E180A	Post	0.154134
E180A	Post	0.130962
E180A	Post	0.136934
E180A	Post	0.191491
E180A	Post	-0.0272559
E180A	Post	0.304672
E180A	Post	0.20177
E180A	Post	0.226976
E180A	Post	0.189265
E180A	Post	0.186116
E180A	Post	0.0165741
E180A	Post	0.0713735
E180A	Post	0.29732
E180A	Post	0.39351
E180A	Post	0.0246207
E180A	Post	0.0246207
E180A	Post	0.310291
E180A	Post	0.122155
E180A	Post	0.337053
E180A	Post	0.027049
E180A	Post	0.152519
E180A	Post	0.0349227
E180A	Post	0.085438
E180A	Post	0.126083
E180A	Post	0.102922
E180A	Post	0.00727852
E180A	Post	0.0566026
E180A	Post	0.00903091
E180A	Post	0.505204
E180A	Post	0.368455
E180A	Post	0.000115659
E180A	Post	0.310397
E180A	Post	0.179791
E180A	Post	0.0820437
E180A	Post	0.42647
E180A	Post	0.184066
E180A	Post	0.129918
E180A	Post	0.035741
E180A	Post	0.592898
E180A	Post	0.127363
E180A	Post	0.0444412
E180A	Post	0.0456704
E180A	Post	0.372867
E180A	Post	0.0581654
E180A	Post	0.430328
E180A	Post	0.197972
E180A	Post	0.00959622
E180A	Post	0.0630004
E180A	Post	0.345207
E180A	Post	0.0740029
E180A	Post	0.0819395
E180A	Post	0.0307672
E180A	Post	0.0733176
E180A	Post	0.335021
E180A	Post	0.119393
E180A	Post	0.0196814
E180A	Post	0.00821467
E180A	Post	0.265604
E180A	Post	0.24926
E180A	Post	0.0631318
E180A	Post	0.0597263
E180A	Post	0.0413547
E180A	Post	0.0373944
E180A	Post	0.359231
E180A	Post	0.0233696
E180A	Post	0.329647
E180A	Post	0.0728673
E180A	Post	0.208932
E180A	Post	0.132985
E180A	Post	0.231455
E180A	Post	0.193702
E180A	Post	0.236528
E180A	Post	0.185101
E180A	Post	0.185101
E180A	Post	0.0529486
E180A	Post	0.0114933
E180A	Post	0.160761
E180A	Post	0.0108255
E180A	Post	0.0460598
E180A	Post	0.150116
E180A	Post	0.00656665
E180A	Post	0.164347
E180A	Post	0.0805407
E180A	Post	0.146804
E180A	Post	-0.00446988
E180A	Post	0.246082
E180A	Post	0.540229
E180A	Post	0.108396
E180A	Post	0.0108001
E180A	Post	0.177047
E180A	Post	0.426246
E180A	Post	0.0429579
E180A	Post	0.764958
E180A	Post	1.15213
E180A	Post	0.191863
E180A	Post	0.362297
E180A	Post	0.356417
E180A	Post	0.508684
E180A	Post	0.269356
E180A	Post	0.110085
E180A_Set2OE	Pre	0.0644739
E180A_Set2OE	Pre	0.0169011
E180A_Set2OE	Pre	0.130326
E180A_Set2OE	Pre	0.0294677
E180A_Set2OE	Pre	0.0550439
E180A_Set2OE	Pre	0.0156339
E180A_Set2OE	Pre	0.0132957
E180A_Set2OE	Pre	0.0594844
E180A_Set2OE	Pre	0.0642203
E180A_Set2OE	Pre	0.0564553
E180A_Set2OE	Pre	0.0266729
E180A_Set2OE	Pre	0.0328748
E180A_Set2OE	Pre	0.0269816
E180A_Set2OE	Pre	0.0439281
E180A_Set2OE	Pre	0.0268543
E180A_Set2OE	Pre	0.0256779
E180A_Set2OE	Pre	0.0411333
E180A_Set2OE	Pre	0.0419845
E180A_Set2OE	Pre	0.0145471
E180A_Set2OE	Pre	0.0449172
E180A_Set2OE	Pre	0.0343393
E180A_Set2OE	Pre	0.0216209
E180A_Set2OE	Pre	0.0384888
E180A_Set2OE	Pre	0.0235012
E180A_Set2OE	Pre	0.00729377
E180A_Set2OE	Pre	0.0140335
E180A_Set2OE	Pre	0.0260164
E180A_Set2OE	Pre	0.0402847
E180A_Set2OE	Pre	0.00729377
E180A_Set2OE	Pre	0.0140335
E180A_Set2OE	Pre	0.0287319
E180A_Set2OE	Pre	0.0402847
E180A_Set2OE	Pre	0.02985
E180A_Set2OE	Pre	0.0325541
E180A_Set2OE	Pre	0.0290021
E180A_Set2OE	Pre	0.0334656
E180A_Set2OE	Pre	0.0340907
E180A_Set2OE	Pre	0.0190698
E180A_Set2OE	Pre	0.0459854
E180A_Set2OE	Pre	0.02995
E180A_Set2OE	Pre	0.0351447
E180A_Set2OE	Pre	0.0320394
E180A_Set2OE	Pre	0.0106418
E180A_Set2OE	Pre	0.0330249
E180A_Set2OE	Pre	0.0159629
E180A_Set2OE	Pre	0.0727284
E180A_Set2OE	Pre	0.0346414
E180A_Set2OE	Pre	0.0220044
E180A_Set2OE	Pre	0.0323486
E180A_Set2OE	Pre	0.0460027
E180A_Set2OE	Pre	0.0559024
E180A_Set2OE	Pre	0.0151241
E180A_Set2OE	Pre	0.0257595
E180A_Set2OE	Pre	0.0265765
E180A_Set2OE	Pre	0.0129837
E180A_Set2OE	Pre	0.0151331
E180A_Set2OE	Pre	0.0340429
E180A_Set2OE	Pre	0.0297488
E180A_Set2OE	Pre	0.0269816
E180A_Set2OE	Pre	0.0257245
E180A_Set2OE	Pre	0.0354097
E180A_Set2OE	Pre	0.0430237
E180A_Set2OE	Pre	0.0364219
E180A_Set2OE	Pre	0.0151241
E180A_Set2OE	Pre	0.0257595
E180A_Set2OE	Pre	0.0299144
E180A_Set2OE	Pre	0.01521
E180A_Set2OE	Pre	0.0328748
E180A_Set2OE	Pre	0.031085
E180A_Set2OE	Pre	0.117673
E180A_Set2OE	Pre	0.0166965
E180A_Set2OE	Pre	0.0431345
E180A_Set2OE	Pre	0.0148958
E180A_Set2OE	Pre	0.0255661
E180A_Set2OE	Pre	0.0248192
E180A_Set2OE	Pre	0.0389036
E180A_Set2OE	Pre	0.029629
E180A_Set2OE	Pre	0.0168488
E180A_Set2OE	Pre	0.0186168
E180A_Set2OE	Pre	0.0195222
E180A_Set2OE	Pre	0.0114435
E180A_Set2OE	Pre	0.0647817
E180A_Set2OE	Pre	0.018464
E180A_Set2OE	Pre	0.105221
E180A_Set2OE	Pre	0.0676815
E180A_Set2OE	Pre	0.018715
E180A_Set2OE	Pre	0.025837
E180A_Set2OE	Pre	0.0843137
E180A_Set2OE	Pre	0.0465188
E180A_Set2OE	Pre	0.0311496
E180A_Set2OE	Pre	0.0203052
E180A_Set2OE	Pre	0.0544835
E180A_Set2OE	Pre	0.0277598
E180A_Set2OE	Pre	0.0228758
E180A_Set2OE	Pre	0.0453123
E180A_Set2OE	Pre	0.039387
E180A_Set2OE	Pre	0.0389383
E180A_Set2OE	Pre	0.0307163
E180A_Set2OE	Pre	0.0416304
E180A_Set2OE	Pre	0.0333597
E180A_Set2OE	Pre	0.0474551
E180A_Set2OE	Pre	0.0434161
E180A_Set2OE	Pre	0.0131065
E180A_Set2OE	Pre	0.0333005
E180A_Set2OE	Pre	0.0514398
E180A_Set2OE	Pre	0.0826884
E180A_Set2OE	Pre	0.0236216
E180A_Set2OE	Pre	0.0444509
E180A_Set2OE	Pre	0.0612825
E180A_Set2OE	Pre	0.0180815
E180A_Set2OE	Pre	0.0760124
E180A_Set2OE	Pre	0.124066
E180A_Set2OE	Pre	0.107783
E180A_Set2OE	Pre	0.0545995
E180A_Set2OE	Pre	0.0728189
E180A_Set2OE	Pre	0.0470296
E180A_Set2OE	Pre	0.0800729
E180A_Set2OE	Pre	0.0426788
E180A_Set2OE	Pre	0.0487548
E180A_Set2OE	Pre	0.0949103
E180A_Set2OE	Pre	0.0202094
E180A_Set2OE	Pre	0.0681638
E180A_Set2OE	Pre	0.0151978
E180A_Set2OE	Pre	0.0614487
E180A_Set2OE	Pre	0.0251882
E180A_Set2OE	Pre	0.0960751
E180A_Set2OE	Pre	0.0849428
E180A_Set2OE	Pre	0.0794529
E180A_Set2OE	Pre	0.106247
E180A_Set2OE	Pre	0.0122637
E180A_Set2OE	Pre	0.00958382
E180A_Set2OE	Pre	0.0374918
E180A_Set2OE	Pre	0.0304715
E180A_Set2OE	Pre	0.0397248
E180A_Set2OE	Pre	0.0268276
E180A_Set2OE	Pre	0.0493097
E180A_Set2OE	Pre	0.0539593
E180A_Set2OE	Pre	0.0446853
E180A_Set2OE	Pre	0.0833467
E180A_Set2OE	Post	1.36854
E180A_Set2OE	Post	1.21436
E180A_Set2OE	Post	1.64121
E180A_Set2OE	Post	1.18682
E180A_Set2OE	Post	1.51563
E180A_Set2OE	Post	3.03357
E180A_Set2OE	Post	2.0182
E180A_Set2OE	Post	1.6101
E180A_Set2OE	Post	2.21106
E180A_Set2OE	Post	1.86957
E180A_Set2OE	Post	2.03367
E180A_Set2OE	Post	2.0419
E180A_Set2OE	Post	1.25122
E180A_Set2OE	Post	1.33536
E180A_Set2OE	Post	2.03347
E180A_Set2OE	Post	2.03658
E180A_Set2OE	Post	3.07467
E180A_Set2OE	Post	4.0444
E180A_Set2OE	Post	5.05968
E180A_Set2OE	Post	3.09042
E180A_Set2OE	Post	2.21354
E180A_Set2OE	Post	1.09746
E180A_Set2OE	Post	2.12851
E180A_Set2OE	Post	3.10456
E180A_Set2OE	Post	2.07946
E180A_Set2OE	Post	2.0282
E180A_Set2OE	Post	3.00507
E180A_Set2OE	Post	4.16996
E180A_Set2OE	Post	1.07946
E180A_Set2OE	Post	1.0282
E180A_Set2OE	Post	1.06212
E180A_Set2OE	Post	1.16996
E180A_Set2OE	Post	2.29303
E180A_Set2OE	Post	1.06248
E180A_Set2OE	Post	1.03448
E180A_Set2OE	Post	2.10912
E180A_Set2OE	Post	1.0578
E180A_Set2OE	Post	3.02542
E180A_Set2OE	Post	1.05538
E180A_Set2OE	Post	1.05737
E180A_Set2OE	Post	1.31593
E180A_Set2OE	Post	1.06141
E180A_Set2OE	Post	1.01467
E180A_Set2OE	Post	-0.00979827
E180A_Set2OE	Post	1.97911
E180A_Set2OE	Post	1.04987
E180A_Set2OE	Post	2.05303
E180A_Set2OE	Post	3.14329
E180A_Set2OE	Post	2.01385
E180A_Set2OE	Post	1.03488
E180A_Set2OE	Post	5.05185
E180A_Set2OE	Post	1.08016
E180A_Set2OE	Post	2.62235
E180A_Set2OE	Post	2.04345
E180A_Set2OE	Post	3.02198
E180A_Set2OE	Post	1.04692
E180A_Set2OE	Post	1.80869
E180A_Set2OE	Post	1.34969
E180A_Set2OE	Post	0.251218
E180A_Set2OE	Post	0.147455
E180A_Set2OE	Post	0.0209234
E180A_Set2OE	Post	0.0533742
E180A_Set2OE	Post	0.0518485
E180A_Set2OE	Post	2.80156
E180A_Set2OE	Post	2.62235
E180A_Set2OE	Post	0.0468385
E180A_Set2OE	Post	0.0242225
E180A_Set2OE	Post	2.0419
E180A_Set2OE	Post	0.0381952
E180A_Set2OE	Post	2.94888
E180A_Set2OE	Post	1.01744
E180A_Set2OE	Post	0.02202
E180A_Set2OE	Post	0.00990379
E180A_Set2OE	Post	0.0556762
E180A_Set2OE	Post	0.0359657
E180A_Set2OE	Post	0.109674
E180A_Set2OE	Post	0.0308716
E180A_Set2OE	Post	-0.00548541
E180A_Set2OE	Post	0.0435945
E180A_Set2OE	Post	0.0140135
E180A_Set2OE	Post	1.00366
E180A_Set2OE	Post	0.373671
E180A_Set2OE	Post	0.116601
E180A_Set2OE	Post	1.31229
E180A_Set2OE	Post	0.115638
E180A_Set2OE	Post	0.00431214
E180A_Set2OE	Post	0.106093
E180A_Set2OE	Post	0.0437142
E180A_Set2OE	Post	0.0213129
E180A_Set2OE	Post	0.0333098
E180A_Set2OE	Post	1.04295
E180A_Set2OE	Post	0.126339
E180A_Set2OE	Post	0.0155945
E180A_Set2OE	Post	0.0374445
E180A_Set2OE	Post	0.0746746
E180A_Set2OE	Post	0.15388
E180A_Set2OE	Post	0.0286653
E180A_Set2OE	Post	0.0623631
E180A_Set2OE	Post	0.0660135
E180A_Set2OE	Post	0.0577072
E180A_Set2OE	Post	0.056773
E180A_Set2OE	Post	0.0449154
E180A_Set2OE	Post	0.0108309
E180A_Set2OE	Post	0.0499442
E180A_Set2OE	Post	1.02497
E180A_Set2OE	Post	3.15489
E180A_Set2OE	Post	0.0469005
E180A_Set2OE	Post	0.698564
E180A_Set2OE	Post	0.725937
E180A_Set2OE	Post	0.210886
E180A_Set2OE	Post	1.32419
E180A_Set2OE	Post	0.772744
E180A_Set2OE	Post	0.850367
E180A_Set2OE	Post	0.78168
E180A_Set2OE	Post	0.964297
E180A_Set2OE	Post	0.803515
E180A_Set2OE	Post	0.623136
E180A_Set2OE	Post	0.535435
E180A_Set2OE	Post	0.82286
E180A_Set2OE	Post	0.313071
E180A_Set2OE	Post	0.0392912
E180A_Set2OE	Post	0.799907
E180A_Set2OE	Post	0.0676744
E180A_Set2OE	Post	0.860135
E180A_Set2OE	Post	0.0184233
E180A_Set2OE	Post	-0.0179743
E180A_Set2OE	Post	-0.0279677
E180A_Set2OE	Post	-0.04941
E180A_Set2OE	Post	-0.0109697
E180A_Set2OE	Post	0.00800093
E180A_Set2OE	Post	0.0239712
E180A_Set2OE	Post	0.150549
E180A_Set2OE	Post	0.0843866
E180A_Set2OE	Post	1.37129
E180A_Set2OE	Post	0.0383221
E180A_Set2OE	Post	0.0608397
E180A_Set2OE	Post	0.136694
E180A_Set2OE	Post	0.112253
E180A_Set2OE	Post	1.9135
